# Supplementary material for: Genome-wide association study in quinoa reveals selection pattern typical for crops with a short breeding history
Source: eLife. 2022 Jul 8;11:e66873. doi: 10.7554/eLife.66873 (PMC9388097; doi:10.7554/eLife.66873)
Supplement: Figure 1—source data 1. [file elife-66873-fig1-data1.xlsx]

## Sheet: Figure 1a
Figure 1-source data 1
Figure 1-source data 1: PCA of 303 quinoa accessions. PC1 and PC2 represent the first two components of analysis, accounting for 23.35% and 9.45% of the total variation, respectively
id	PC1	PC2	pop	Country
10176	-0.0373474	0.0192002	highland	Unknown
10178	-0.0204052	0.0773786	highland	Unknown
10181	-0.0184557	0.141585	highland	Peru
10183	-0.0387549	-0.010064	highland	Unknown
10184	0.0242956	-0.00725147	lowland	Unknown
10190	0.101365	-0.0264637	lowland	Unknown
10191	0.0788231	-0.0171246	lowland	Unknown
S1A10	-0.0544796	-0.0616021	highland	Peru
S1A2	-0.058767	-0.0716237	highland	Peru
S1A3	-0.0597954	-0.07464	highland	Bolivia
S1A5	0.0875981	-0.022007	lowland	Unknown
S1A6	0.0979273	-0.0254373	lowland	United States
S1A7	-0.0172181	0.113974	highland	Peru
S1A8	0.0731609	-0.0115244	lowland	Chile
S1A9	0.0959802	-0.0195569	lowland	Chile
S1B1	0.0968738	-0.0257387	lowland	Bolivia
S1B3	0.0685442	-0.00387602	lowland	United States
S1B4	-0.0321707	-0.0301428	highland	Bolivia
S1B5	-0.0159318	0.136766	highland	Peru
S1B6	0.0541797	0.00926155	lowland	United States
S1B8	0.0805752	-0.0115932	lowland	Chile
S1B9	0.0932728	-0.0235652	lowland	Chile
S1C10	-0.056525	-0.0634571	highland	Peru
S1C1	0.0957307	-0.0256981	lowland	Unknown
S1C2	-0.058998	-0.0727672	highland	Peru
S1C3	-0.0578194	-0.0673868	highland	Peru
S1C4	-0.0541849	-0.0590066	highland	Peru
S1C6	0.0592718	-0.00161329	lowland	United States
S1C7	-0.0533081	-0.0602306	highland	Peru
S1C8	0.0527027	0.00846788	lowland	United States
S1C9	0.0938304	-0.0243607	lowland	Chile
S1D10	0.085881	-0.0200786	lowland	Chile
S1D11	0.0310124	0.0202774	lowland	United States
S1D1	0.0962761	-0.0251241	lowland	Chile
S1D2	-0.0493377	-0.0566225	highland	Peru
S1D3	0.0976587	-0.0243752	lowland	Unknown
S1D4	0.0896328	-0.0178276	lowland	Unknown
S1D5	0.100878	-0.0253131	lowland	United Kingdom
S1D6	0.0937609	-0.0236426	lowland	Unknown
S1D7	-0.0235045	0.0890965	highland	Peru
S1D8	-0.0176533	0.121019	highland	Peru
S1E11	-0.0580135	-0.0673995	highland	Peru
S1E1	0.0508713	-0.0100865	lowland	Unknown
S1E2	-0.0181232	0.143291	highland	Peru
S1E3	0.0916206	-0.022245	lowland	Chile
S1E4	0.0933237	-0.024092	lowland	Unknown
S1E5	-0.0209678	0.095903	highland	Peru
S1E6	0.0996538	-0.0258117	lowland	United States
S1E8	-0.0537679	-0.0650081	highland	Bolivia
S1E9	0.0661428	-0.0250816	lowland	Denmark
S1F10	-0.0552015	-0.063448	highland	Peru
S1F11	-0.0156805	0.134109	highland	Unknown
S1F1	0.0867895	-0.0246931	lowland	Unknown
S1F2	-0.0596344	-0.0671868	highland	Bolivia
S1F3	-0.0159171	0.12668	highland	Peru
S1F4	-0.0513301	-0.034561	highland	Peru
S1F5	-0.0263529	0.0904211	highland	Peru
S1F6	0.0730776	-0.0080659	lowland	United States
S1F7	0.0659408	-0.00419815	lowland	United States
S1F8	-0.0393826	-0.0046039	highland	Bolivia
S1F9	0.0821787	-0.0162916	lowland	Unknown
S1G10	0.0312947	-0.0209803	lowland	United States
S1G11	-0.0557818	-0.0627363	highland	Peru
S1G1	0.0982633	-0.0240868	lowland	Chile
S1G2	-0.0263923	0.0876089	highland	Peru
S1G3	0.0903947	-0.0173536	lowland	Unknown
S1G4	-0.060275	-0.0765832	highland	Peru
S1G5	0.10086	-0.0257544	lowland	Unknown
S1G6	0.0607673	0.00280148	lowland	United States
S1G7	0.0801197	-0.0198296	lowland	Chile
S1G8	0.0883553	-0.0206776	lowland	Chile
S1G9	0.0489642	0.00422826	lowland	United States
S1H10	-0.0536689	-0.0601265	highland	Peru
S1H11	-0.0549369	-0.0625038	highland	Peru
S1H1	0.0980859	-0.0243131	lowland	Unknown
S1H2	-0.0294764	0.00400436	highland	Bolivia
S1H3	-0.0514354	-0.0492124	highland	Peru
S1H4	-0.0596176	-0.0685231	highland	Peru
S1H5	0.0949176	-0.0226982	lowland	Chile
S1H6	0.0949449	-0.0244111	lowland	Chile
S1H7	0.037438	0.0126792	lowland	United States
S1H8	-0.0389266	-0.0341827	highland	Bolivia
S1H9	0.0845374	-0.0201611	lowland	Chile
S2A10	-0.0176962	0.0611035	highland	Peru
S2A1	-0.0280312	0.0207336	highland	Peru
S2A4	0.0885898	-0.0211975	lowland	United States
S2A5	-0.0589239	-0.0726182	highland	Peru
S2A6	0.0956632	-0.0235226	lowland	Unknown
S2A7	0.064662	-0.0186715	lowland	United States
S2A8	-0.0171639	0.105003	highland	Bolivia
S2A9	-0.0574979	-0.065726	highland	Peru
S2B10	-0.0589505	-0.0688524	highland	Bolivia
S2B1	0.0766332	-0.0125358	lowland	Chile
S2B2	0.0813912	-0.0192827	lowland	Chile
S2B3	-0.0390638	0.0074267	highland	Peru
S2B4	-0.0174616	0.0397399	highland	Peru
S2B5	-0.0526512	-0.0625112	highland	Peru
S2B6	-0.0367061	0.002458	highland	Bolivia
S2B7	-0.0172608	0.119943	highland	Peru
S2B8	-0.021263	0.14579	highland	Peru
S2B9	-0.0549186	-0.059445	highland	Peru
S2C10	0.0988659	-0.0261844	lowland	Argentina
S2C2	-0.0404141	-0.0135836	highland	Peru
S2C3	0.0312161	0.000983778	lowland	United States
S2C4	-0.0410343	-0.0247652	highland	Bolivia
S2C5	-0.0565541	-0.0623115	highland	Peru
S2C6	0.0622502	-0.0101752	lowland	United States
S2C7	-0.0563401	-0.0660787	highland	Peru
S2C9	-0.0298071	0.0164453	highland	Bolivia
S2D10	-0.0566239	-0.0679629	highland	Bolivia
S2D11	-0.0178196	0.127331	highland	Peru
S2D1	0.0967788	-0.0242319	lowland	Chile
S2D3	0.0838105	-0.0220893	lowland	Unknown
S2D4	0.0487541	0.0176883	lowland	United States
S2D5	0.0867402	-0.0176578	lowland	Argentina
S2D7	-0.0233985	0.0141605	highland	Peru
S2D8	-0.0471725	-0.0498292	highland	Peru
S2D9	0.0241566	-0.000717736	lowland	United States
S2E10	-0.0174406	0.102792	highland	Peru
S2E11	0.0866554	-0.018243	lowland	Chile
S2E1	0.0749073	-0.0146035	lowland	Unknown
S2E3	-0.0515894	-0.0630911	highland	Peru
S2E4	0.0380155	0.0515452	lowland	United States
S2E5	0.0806796	-0.0138928	lowland	Unknown
S2E6	0.0542334	-0.00326541	lowland	United States
S2E7	-0.0565697	-0.0656986	highland	Peru
S2E9	-0.0424843	0.00239484	highland	Peru
S2F10	-0.0480357	-0.0401911	highland	Peru
S2F11	0.0905068	-0.0195298	lowland	Chile
S2F1	0.0957246	-0.0235516	lowland	Chile
S2F2	-0.0183178	0.120424	highland	Peru
S2F3	0.0877368	-0.0174899	lowland	Unknown
S2F4	0.0944195	-0.0235206	lowland	Unknown
S2F5	0.0811098	-0.0189721	lowland	Chile
S2F7	-0.0571132	-0.0708364	highland	Peru
S2F8	-0.0128668	0.0854878	highland	Bolivia
S2G10	0.0896933	-0.0187492	lowland	Chile
S2G11	-0.0297071	0.0648347	highland	Peru
S2G1	0.0871325	-0.0169607	lowland	Chile
S2G2	0.094802	-0.0226083	lowland	Chile
S2G3	-0.0520003	-0.0637225	highland	Bolivia
S2G4	0.0315899	-0.00193698	lowland	United States
S2G5	-0.0285458	0.0224728	highland	Bolivia
S2G6	0.0846276	-0.0155506	lowland	United States
S2G8	-0.0548819	-0.0674169	highland	Bolivia
S2G9	-0.0299577	0.0216473	highland	Bolivia
S2H11	0.0999843	-0.024401	lowland	Chile
S2H2	-0.0210489	0.070951	highland	Peru
S2H3	0.0770091	-0.0183844	lowland	Chile
S2H4	-0.0249737	0.0627793	highland	Peru
S2H5	0.027536	0.0262103	lowland	United States
S2H6	-0.0519828	-0.0630714	highland	Peru
S2H7	-0.0163414	0.0585568	highland	Unknown
S2H8	-0.0190242	0.131326	highland	Peru
S2H9	-0.0328199	0.0535881	highland	Peru
S3A10	-0.0240814	0.0950414	highland	Peru
S3A3	-0.0552997	-0.064017	highland	Peru
S3A4	-0.0587021	-0.0675266	highland	United States
S3A5	-0.0483159	-0.0279992	highland	Unknown
S3A6	0.0948605	-0.0242353	lowland	Unknown
S3A7	0.0924146	-0.0201799	lowland	Peru
S3A8	-0.0509153	-0.0602498	highland	Bolivia
S3A9	-0.0255894	0.0351224	highland	Peru
S3B1	0.0225241	-0.0278757	lowland	Peru
S3B3	-0.0466066	0.00724635	highland	Peru
S3B4	-0.0456802	-0.0531384	highland	Unknown
S3B5	-0.0523476	-0.0582128	highland	Bolivia
S3B6	-0.0454762	-0.0108834	highland	Unknown
S3B8	-0.0344694	0.00682973	highland	Peru
S3B9	-0.0309278	0.0438364	highland	Peru
S3C10	-0.0573219	-0.0622875	highland	Peru
S3C1	0.0475521	-0.00633603	lowland	Switzerland
S3C2	-0.0562337	-0.0554087	highland	Peru
S3C3	-0.0233726	0.147	highland	Bolivia
S3C4	-0.0328929	0.0165646	highland	Peru
S3C5	-0.0424372	0.0276701	highland	Peru
S3C6	-0.0559901	-0.0559468	highland	Unknown
S3C7	-0.018789	0.138081	highland	Peru
S3C8	-0.0530221	-0.0507288	highland	Peru
S3D10	-0.0161001	0.123458	highland	Peru
S3D11	-0.0552591	-0.0655939	highland	Unknown
S3D1	-0.0589197	-0.0669954	highland	Peru
S3D3	-0.050624	-0.037583	highland	Peru
S3D4	-0.0146721	0.100971	highland	Chile
S3D5	0.0973742	-0.0253573	lowland	United States
S3D6	-0.0445741	-0.016416	highland	Chile
S3D7	-0.0448046	-0.0120065	highland	Bolivia
S3D8	-0.0586111	-0.0676761	highland	Bolivia
S3D9	-0.0646582	-0.0733807	highland	Peru
S3E10	-0.0168087	0.0105541	highland	Peru
S3E11	-0.0241716	0.0471061	highland	Peru
S3E1	-0.0193813	0.132723	highland	Peru
S3E3	-0.0440853	-0.0173066	highland	Peru
S3E4	0.0952014	-0.0223585	lowland	Bolivia
S3E5	0.0230533	-0.0137187	lowland	Chile
S3E6	0.0971045	-0.0226738	lowland	Peru
S3E7	-0.0372734	0.00242805	highland	Peru
S3E8	-0.049195	-0.0544626	highland	Peru
S3E9	-0.0608903	-0.0640182	highland	Peru
S3F10	-0.0299254	0.048458	highland	Peru
S3F1	0.0922732	-0.0233778	lowland	United States
S3F2	-0.040349	0.0293896	highland	Peru
S3F3	-0.0609256	-0.0676904	highland	Peru
S3F4	-0.0538675	-0.0574155	highland	Peru
S3F5	-0.0566193	-0.0528523	highland	Peru
S3F6	-0.0560297	-0.0662467	highland	Peru
S3F7	-0.0599509	-0.0686858	highland	Unknown
S3F8	-0.0339125	-0.00730933	highland	Peru
S3G1	-0.0351197	0.0337043	highland	Bolivia
S3G3	-0.0601969	-0.067962	highland	Bolivia
S3G4	0.0612469	-0.0136354	lowland	Peru
S3G5	-0.0243801	0.045991	highland	Peru
S3G6	0.0938351	-0.0240062	lowland	Ecuador
S3G8	-0.0244271	0.0806598	highland	Peru
S3G9	-0.0508854	-0.0375625	highland	Bolivia
S3H10	-0.0327899	0.066743	highland	Unknown
S3H3	-0.0485165	-0.0195426	highland	Peru
S3H4	0.0395851	-0.00535982	lowland	Peru
S3H5	0.0827714	-0.0204031	lowland	Peru
S3H7	-0.0199575	0.133558	highland	Unknown
S3H8	-0.0319313	0.0228904	highland	Peru
S3H9	-0.0182657	0.130448	highland	Bolivia
S4A10	-0.0138965	0.11156	highland	Peru
S4A1	-0.0571372	-0.0658964	highland	Bolivia
S4A2	-0.0269516	0.048308	highland	Peru
S4A3	-0.0319806	-0.000917847	highland	Peru
S4A4	-0.0472819	-0.0199644	highland	Peru
S4A5	-0.0577755	-0.0567333	highland	Peru
S4A7	0.0815818	-0.0236664	lowland	Unknown
S4A8	-0.0182581	0.12615	highland	Peru
S4A9	-0.055244	-0.06516	highland	Peru
S4B10	-0.0277779	0.0280469	highland	Bolivia
S4B1	-0.0410471	-0.0129945	highland	Peru
S4B2	-0.0369653	0.0277174	highland	Peru
S4B3	0.0152619	-0.00128705	lowland	Unknown
S4B4	-0.0214356	0.0238451	highland	Bolivia
S4B5	-0.0203392	0.144167	highland	Peru
S4B6	0.0970463	-0.0251924	lowland	Denmark
S4B7	0.0843605	-0.0202308	lowland	United States
S4B8	0.0820965	-0.0181121	lowland	Chile
S4B9	-0.0149313	0.0820004	highland	Bolivia
S4C10	-0.043715	-0.0150487	highland	Peru
S4C1	-0.0447318	-0.015963	highland	Peru
S4C2	-0.0209691	0.111992	highland	Peru
S4C3	-0.0311902	0.0362091	highland	Peru
S4C4	-0.0119968	0.0704977	highland	Unknown
S4C5	-0.05684	-0.0611237	highland	Peru
S4C6	-0.0341415	-0.00217296	highland	Peru
S4C7	-0.0136748	0.0986468	highland	Bolivia
S4C8	0.0948489	-0.02298	lowland	Argentina
S4C9	-0.0181223	0.0512509	highland	Bolivia
S4D10	-0.0434655	-0.0260997	highland	Unknown
S4D11	-0.0508316	-0.0590298	highland	Peru
S4D1	-0.0377629	-0.0160481	highland	Australia
S4D2	-0.0248111	0.0964249	highland	Peru
S4D3	-0.0463805	-0.0127418	highland	Peru
S4D4	-0.0358024	0.0186831	highland	Peru
S4D5	-0.0187643	0.0426124	highland	Bolivia
S4D6	-0.0559079	-0.0642415	highland	Peru
S4D7	-0.0578838	-0.0661455	highland	Peru
S4D8	0.0997583	-0.0257363	lowland	United Kingdom
S4D9	0.0872231	-0.0196805	lowland	Chile
S4E11	-0.0440073	-0.0483048	highland	Bolivia
S4E1	-0.0272629	0.0511531	highland	Unknown
S4E2	-0.0221146	0.141602	highland	Peru
S4E3	-0.0479328	-0.0222299	highland	Peru
S4E4	-0.030109	0.0759259	highland	Peru
S4E5	-0.0599709	-0.0666622	highland	Peru
S4E6	-0.0282258	0.0724718	highland	Peru
S4E7	-0.0474048	-0.0481415	highland	Bolivia
S4E8	-0.0203229	0.0703006	highland	Bolivia
S4E9	-0.0565076	-0.0648756	highland	Peru
S4F10	-0.00848561	0.0990874	highland	Argentina
S4F11	0.0839486	-0.0199514	lowland	United States
S4F1	-0.0210873	0.0327283	highland	Bolivia
S4F2	-0.0562445	-0.0557717	highland	Peru
S4F3	-0.0576957	-0.0698254	highland	Peru
S4F4	-0.0532611	-0.0580784	highland	Peru
S4F5	-0.012704	0.0899456	highland	Argentina
S4F6	-0.030603	0.0659076	highland	Unknown
S4F7	-0.027151	0.0303667	highland	Bolivia
S4F8	0.0592462	0.00246968	lowland	United States
S4F9	-0.0295744	0.0418477	highland	Bolivia
S4G10	-0.0286462	0.0522998	highland	Peru
S4G1	-0.0404684	-0.0131238	highland	Peru
S4G2	-0.0478945	-0.0447588	highland	Bolivia
S4G3	-0.0373312	0.0255554	highland	Peru
S4G4	-0.0357228	0.00649985	highland	Peru
S4G5	-0.0306688	0.028536	highland	Bolivia
S4G6	-0.0454778	-0.031704	highland	Peru
S4G7	-0.0403958	-0.031204	highland	Bolivia
S4G8	0.0911879	-0.022975	lowland	Chile
S4G9	-0.0560639	-0.0629321	highland	Peru
S4H10	-0.0497755	-0.0552248	highland	Peru
S4H11	-0.0121074	0.0972855	highland	Peru
S4H1	-0.0242993	0.0381901	highland	Unknown
S4H2	-0.0350899	0.0299905	highland	Peru
S4H3	-0.0159759	0.123404	highland	Peru
S4H4	-0.0340002	0.0347593	highland	Peru
S4H5	-0.0181115	0.0456698	highland	Peru
S4H6	-0.0406877	-0.0271539	highland	Bolivia
S4H8	-0.0471061	-0.0560122	highland	Peru
S4H9	0.0770384	-0.0181732	lowland	Chile
