# Supplementary material for: Genome-wide association study in quinoa reveals selection pattern typical for crops with a short breeding history
Source: eLife. 2022 Jul 8;11:e66873. doi: 10.7554/eLife.66873 (PMC9388097; doi:10.7554/eLife.66873)
Supplement: Figure 1—source data 2. [file elife-66873-fig1-data2.xlsx]

## Sheet: Sheet1
Fig. 1b-Source data 1b
Fig.1b: Subpopulation wise LD decay in Highland and Lowland population
Bin	LD	Population
10	0.669889	Lowland
20	0.597148	Lowland
30	0.5449	Lowland
40	0.497875	Lowland
50	0.460335	Lowland
60	0.428812	Lowland
70	0.40448	Lowland
80	0.381742	Lowland
90	0.360625	Lowland
100	0.344589	Lowland
200	0.305804	Lowland
300	0.289367	Lowland
400	0.284134	Lowland
500	0.281143	Lowland
600	0.278529	Lowland
700	0.274904	Lowland
800	0.272304	Lowland
900	0.27013	Lowland
1000	0.269202	Lowland
1100	0.267824	Lowland
1200	0.268562	Lowland
1300	0.267437	Lowland
1400	0.26584	Lowland
1500	0.26563	Lowland
1600	0.265927	Lowland
1700	0.264044	Lowland
1800	0.263028	Lowland
1900	0.261933	Lowland
2000	0.261555	Lowland
2100	0.261272	Lowland
2200	0.259756	Lowland
2300	0.259096	Lowland
2400	0.25973	Lowland
2500	0.258826	Lowland
2600	0.26	Lowland
2700	0.260232	Lowland
2800	0.258809	Lowland
2900	0.259988	Lowland
3000	0.257381	Lowland
3100	0.258431	Lowland
3200	0.258684	Lowland
3300	0.258303	Lowland
3400	0.257953	Lowland
3500	0.25633	Lowland
3600	0.257423	Lowland
3700	0.255667	Lowland
3800	0.25456	Lowland
3900	0.255005	Lowland
4000	0.254642	Lowland
4100	0.254765	Lowland
4200	0.254293	Lowland
4300	0.253588	Lowland
4400	0.254106	Lowland
4500	0.253124	Lowland
4600	0.252291	Lowland
4700	0.251049	Lowland
4800	0.250911	Lowland
4900	0.250394	Lowland
5000	0.250172	Lowland
5100	0.249946	Lowland
5200	0.249697	Lowland
5300	0.248703	Lowland
5400	0.248579	Lowland
5500	0.248081	Lowland
5600	0.247777	Lowland
5700	0.248429	Lowland
5800	0.247702	Lowland
5900	0.247245	Lowland
6000	0.248735	Lowland
6100	0.247642	Lowland
6200	0.247937	Lowland
6300	0.247503	Lowland
6400	0.247443	Lowland
6500	0.246447	Lowland
6600	0.244654	Lowland
6700	0.245123	Lowland
6800	0.244734	Lowland
6900	0.244153	Lowland
7000	0.244152	Lowland
7100	0.243489	Lowland
7200	0.242729	Lowland
7300	0.242327	Lowland
7400	0.242164	Lowland
7500	0.241945	Lowland
7600	0.241442	Lowland
7700	0.241432	Lowland
7800	0.240774	Lowland
7900	0.241349	Lowland
8000	0.240182	Lowland
8100	0.240181	Lowland
8200	0.240317	Lowland
8300	0.2405	Lowland
8400	0.240913	Lowland
8500	0.239752	Lowland
8600	0.239275	Lowland
8700	0.239846	Lowland
8800	0.239708	Lowland
8900	0.239943	Lowland
9000	0.240601	Lowland
9100	0.240467	Lowland
9200	0.23889	Lowland
9300	0.238984	Lowland
9400	0.237725	Lowland
9500	0.237961	Lowland
9600	0.238341	Lowland
9700	0.238192	Lowland
9800	0.237662	Lowland
9900	0.237103	Lowland
10000	0.237759	Lowland
10100	0.23746	Lowland
10200	0.236773	Lowland
10300	0.237271	Lowland
10400	0.23746	Lowland
10500	0.237827	Lowland
10600	0.237867	Lowland
10700	0.237344	Lowland
10800	0.236602	Lowland
10900	0.236688	Lowland
11000	0.237135	Lowland
11100	0.236544	Lowland
11200	0.235925	Lowland
11300	0.236083	Lowland
11400	0.235647	Lowland
11500	0.235392	Lowland
11600	0.235484	Lowland
11700	0.234937	Lowland
11800	0.234348	Lowland
11900	0.234964	Lowland
12000	0.235426	Lowland
12100	0.234121	Lowland
12200	0.232859	Lowland
12300	0.233974	Lowland
12400	0.234439	Lowland
12500	0.233812	Lowland
12600	0.232927	Lowland
12700	0.233314	Lowland
12800	0.233341	Lowland
12900	0.233184	Lowland
13000	0.232601	Lowland
13100	0.233397	Lowland
13200	0.232845	Lowland
13300	0.232744	Lowland
13400	0.231722	Lowland
13500	0.231154	Lowland
13600	0.230437	Lowland
13700	0.230958	Lowland
13800	0.231966	Lowland
13900	0.230439	Lowland
14000	0.231067	Lowland
14100	0.229962	Lowland
14200	0.230113	Lowland
14300	0.230399	Lowland
14400	0.231002	Lowland
14500	0.230601	Lowland
14600	0.229951	Lowland
14700	0.229476	Lowland
14800	0.229613	Lowland
14900	0.229049	Lowland
15000	0.229507	Lowland
15100	0.231241	Lowland
15200	0.229814	Lowland
15300	0.230237	Lowland
15400	0.229701	Lowland
15500	0.229169	Lowland
15600	0.229241	Lowland
15700	0.229143	Lowland
15800	0.228512	Lowland
15900	0.228547	Lowland
16000	0.229002	Lowland
16100	0.229368	Lowland
16200	0.228648	Lowland
16300	0.227758	Lowland
16400	0.228463	Lowland
16500	0.227954	Lowland
16600	0.228001	Lowland
16700	0.22747	Lowland
16800	0.226788	Lowland
16900	0.226542	Lowland
17000	0.227272	Lowland
17100	0.226692	Lowland
17200	0.22636	Lowland
17300	0.227311	Lowland
17400	0.228308	Lowland
17500	0.228393	Lowland
17600	0.22759	Lowland
17700	0.228668	Lowland
17800	0.22619	Lowland
17900	0.226048	Lowland
18000	0.226319	Lowland
18100	0.226666	Lowland
18200	0.225948	Lowland
18300	0.225051	Lowland
18400	0.225424	Lowland
18500	0.22653	Lowland
18600	0.227128	Lowland
18700	0.22655	Lowland
18800	0.225559	Lowland
18900	0.225382	Lowland
19000	0.225248	Lowland
19100	0.225689	Lowland
19200	0.225127	Lowland
19300	0.224769	Lowland
19400	0.223853	Lowland
19500	0.223895	Lowland
19600	0.223161	Lowland
19700	0.224007	Lowland
19800	0.22358	Lowland
19900	0.224673	Lowland
20000	0.224116	Lowland
20100	0.223479	Lowland
20200	0.223963	Lowland
20300	0.22377	Lowland
20400	0.224535	Lowland
20500	0.223608	Lowland
20600	0.22221	Lowland
20700	0.222841	Lowland
20800	0.223147	Lowland
20900	0.22219	Lowland
21000	0.222136	Lowland
21100	0.22379	Lowland
21200	0.222764	Lowland
21300	0.22247	Lowland
21400	0.222124	Lowland
21500	0.222156	Lowland
21600	0.223295	Lowland
21700	0.223593	Lowland
21800	0.222642	Lowland
21900	0.222684	Lowland
22000	0.222705	Lowland
22100	0.223051	Lowland
22200	0.223203	Lowland
22300	0.223266	Lowland
22400	0.222955	Lowland
22500	0.222485	Lowland
22600	0.222269	Lowland
22700	0.221592	Lowland
22800	0.221652	Lowland
22900	0.221277	Lowland
23000	0.220979	Lowland
23100	0.221806	Lowland
23200	0.220687	Lowland
23300	0.220557	Lowland
23400	0.220049	Lowland
23500	0.220377	Lowland
23600	0.220592	Lowland
23700	0.220376	Lowland
23800	0.21997	Lowland
23900	0.22066	Lowland
24000	0.220527	Lowland
24100	0.220094	Lowland
24200	0.219764	Lowland
24300	0.219013	Lowland
24400	0.220611	Lowland
24500	0.220732	Lowland
24600	0.219465	Lowland
24700	0.219616	Lowland
24800	0.218959	Lowland
24900	0.219667	Lowland
25000	0.219889	Lowland
25100	0.221262	Lowland
25200	0.221088	Lowland
25300	0.220344	Lowland
25400	0.219459	Lowland
25500	0.219625	Lowland
25600	0.22024	Lowland
25700	0.220709	Lowland
25800	0.22019	Lowland
25900	0.220267	Lowland
26000	0.219381	Lowland
26100	0.218969	Lowland
26200	0.217716	Lowland
26300	0.219411	Lowland
26400	0.219225	Lowland
26500	0.217559	Lowland
26600	0.21828	Lowland
26700	0.217996	Lowland
26800	0.21751	Lowland
26900	0.218037	Lowland
27000	0.218277	Lowland
27100	0.218058	Lowland
27200	0.21808	Lowland
27300	0.216922	Lowland
27400	0.217316	Lowland
27500	0.216448	Lowland
27600	0.216771	Lowland
27700	0.215784	Lowland
27800	0.216321	Lowland
27900	0.216463	Lowland
28000	0.216742	Lowland
28100	0.217102	Lowland
28200	0.215922	Lowland
28300	0.216152	Lowland
28400	0.216486	Lowland
28500	0.216513	Lowland
28600	0.216489	Lowland
28700	0.215828	Lowland
28800	0.215026	Lowland
28900	0.214589	Lowland
29000	0.215659	Lowland
29100	0.215113	Lowland
29200	0.214023	Lowland
29300	0.214665	Lowland
29400	0.215053	Lowland
29500	0.215149	Lowland
29600	0.214793	Lowland
29700	0.214241	Lowland
29800	0.214507	Lowland
29900	0.214789	Lowland
30000	0.214172	Lowland
30100	0.215631	Lowland
30200	0.215107	Lowland
30300	0.213869	Lowland
30400	0.212947	Lowland
30500	0.212821	Lowland
30600	0.213968	Lowland
30700	0.213582	Lowland
30800	0.213118	Lowland
30900	0.212687	Lowland
31000	0.212615	Lowland
31100	0.213743	Lowland
31200	0.213067	Lowland
31300	0.213747	Lowland
31400	0.212948	Lowland
31500	0.212238	Lowland
31600	0.212581	Lowland
31700	0.212236	Lowland
31800	0.212613	Lowland
31900	0.211194	Lowland
32000	0.21148	Lowland
32100	0.212069	Lowland
32200	0.212216	Lowland
32300	0.212237	Lowland
32400	0.212387	Lowland
32500	0.211457	Lowland
32600	0.211192	Lowland
32700	0.212062	Lowland
32800	0.211977	Lowland
32900	0.211572	Lowland
33000	0.211804	Lowland
33100	0.210784	Lowland
33200	0.210758	Lowland
33300	0.211129	Lowland
33400	0.211635	Lowland
33500	0.210782	Lowland
33600	0.211646	Lowland
33700	0.210802	Lowland
33800	0.210497	Lowland
33900	0.210994	Lowland
34000	0.210291	Lowland
34100	0.209851	Lowland
34200	0.209534	Lowland
34300	0.209889	Lowland
34400	0.210507	Lowland
34500	0.21062	Lowland
34600	0.21153	Lowland
34700	0.210854	Lowland
34800	0.210487	Lowland
34900	0.209911	Lowland
35000	0.210236	Lowland
35100	0.210171	Lowland
35200	0.209197	Lowland
35300	0.210036	Lowland
35400	0.210206	Lowland
35500	0.20948	Lowland
35600	0.209278	Lowland
35700	0.20864	Lowland
35800	0.20943	Lowland
35900	0.208677	Lowland
36000	0.208047	Lowland
36100	0.208185	Lowland
36200	0.207569	Lowland
36300	0.2079	Lowland
36400	0.207816	Lowland
36500	0.209142	Lowland
36600	0.207507	Lowland
36700	0.206939	Lowland
36800	0.20851	Lowland
36900	0.207335	Lowland
37000	0.20701	Lowland
37100	0.207338	Lowland
37200	0.207986	Lowland
37300	0.208245	Lowland
37400	0.208507	Lowland
37500	0.208131	Lowland
37600	0.208588	Lowland
37700	0.208673	Lowland
37800	0.207316	Lowland
37900	0.207323	Lowland
38000	0.207881	Lowland
38100	0.207988	Lowland
38200	0.207086	Lowland
38300	0.206552	Lowland
38400	0.206363	Lowland
38500	0.206606	Lowland
38600	0.206698	Lowland
38700	0.207502	Lowland
38800	0.207553	Lowland
38900	0.206936	Lowland
39000	0.205907	Lowland
39100	0.205757	Lowland
39200	0.20529	Lowland
39300	0.20645	Lowland
39400	0.206574	Lowland
39500	0.205628	Lowland
39600	0.205825	Lowland
39700	0.205125	Lowland
39800	0.206128	Lowland
39900	0.205752	Lowland
40000	0.206653	Lowland
40100	0.204937	Lowland
40200	0.20613	Lowland
40300	0.205576	Lowland
40400	0.205396	Lowland
40500	0.206416	Lowland
40600	0.205627	Lowland
40700	0.205144	Lowland
40800	0.206758	Lowland
40900	0.205837	Lowland
41000	0.205482	Lowland
41100	0.205624	Lowland
41200	0.205839	Lowland
41300	0.205526	Lowland
41400	0.205665	Lowland
41500	0.204396	Lowland
41600	0.204676	Lowland
41700	0.204381	Lowland
41800	0.205294	Lowland
41900	0.205435	Lowland
42000	0.205616	Lowland
42100	0.20529	Lowland
42200	0.204166	Lowland
42300	0.204488	Lowland
42400	0.205314	Lowland
42500	0.203994	Lowland
42600	0.203751	Lowland
42700	0.20314	Lowland
42800	0.203395	Lowland
42900	0.204097	Lowland
43000	0.203142	Lowland
43100	0.203898	Lowland
43200	0.203393	Lowland
43300	0.202968	Lowland
43400	0.203082	Lowland
43500	0.202825	Lowland
43600	0.202708	Lowland
43700	0.202603	Lowland
43800	0.201728	Lowland
43900	0.202844	Lowland
44000	0.202372	Lowland
44100	0.202355	Lowland
44200	0.20467	Lowland
44300	0.203021	Lowland
44400	0.20261	Lowland
44500	0.203127	Lowland
44600	0.202535	Lowland
44700	0.204301	Lowland
44800	0.202992	Lowland
44900	0.20228	Lowland
45000	0.202814	Lowland
45100	0.202892	Lowland
45200	0.202541	Lowland
45300	0.20256	Lowland
45400	0.20365	Lowland
45500	0.202834	Lowland
45600	0.202467	Lowland
45700	0.201289	Lowland
45800	0.201767	Lowland
45900	0.202588	Lowland
46000	0.201867	Lowland
46100	0.201864	Lowland
46200	0.202625	Lowland
46300	0.202255	Lowland
46400	0.201968	Lowland
46500	0.202339	Lowland
46600	0.201441	Lowland
46700	0.201518	Lowland
46800	0.201889	Lowland
46900	0.201553	Lowland
47000	0.200936	Lowland
47100	0.201237	Lowland
47200	0.201992	Lowland
47300	0.201063	Lowland
47400	0.200324	Lowland
47500	0.200064	Lowland
47600	0.201068	Lowland
47700	0.200173	Lowland
47800	0.201288	Lowland
47900	0.200998	Lowland
48000	0.201295	Lowland
48100	0.199648	Lowland
48200	0.200697	Lowland
48300	0.200452	Lowland
48400	0.200959	Lowland
48500	0.200628	Lowland
48600	0.202252	Lowland
48700	0.201178	Lowland
48800	0.199661	Lowland
48900	0.200432	Lowland
49000	0.199317	Lowland
49100	0.20022	Lowland
49200	0.200585	Lowland
49300	0.199607	Lowland
49400	0.199575	Lowland
49500	0.199343	Lowland
49600	0.199605	Lowland
49700	0.199765	Lowland
49800	0.199956	Lowland
49900	0.199845	Lowland
50000	0.20047	Lowland
50100	0.200844	Lowland
50200	0.199625	Lowland
50300	0.199448	Lowland
50400	0.198634	Lowland
50500	0.198309	Lowland
50600	0.198195	Lowland
50700	0.199148	Lowland
50800	0.198124	Lowland
50900	0.197197	Lowland
51000	0.198591	Lowland
51100	0.197225	Lowland
51200	0.198512	Lowland
51300	0.197717	Lowland
51400	0.197414	Lowland
51500	0.197016	Lowland
51600	0.198462	Lowland
51700	0.198258	Lowland
51800	0.199308	Lowland
51900	0.198284	Lowland
52000	0.198694	Lowland
52100	0.197968	Lowland
52200	0.197924	Lowland
52300	0.1982	Lowland
52400	0.198683	Lowland
52500	0.198117	Lowland
52600	0.199079	Lowland
52700	0.197869	Lowland
52800	0.198191	Lowland
52900	0.198718	Lowland
53000	0.19767	Lowland
53100	0.19733	Lowland
53200	0.195974	Lowland
53300	0.196154	Lowland
53400	0.195959	Lowland
53500	0.195886	Lowland
53600	0.196091	Lowland
53700	0.196485	Lowland
53800	0.196769	Lowland
53900	0.196522	Lowland
54000	0.195676	Lowland
54100	0.19606	Lowland
54200	0.195817	Lowland
54300	0.196836	Lowland
54400	0.197288	Lowland
54500	0.19697	Lowland
54600	0.196391	Lowland
54700	0.195655	Lowland
54800	0.19645	Lowland
54900	0.195669	Lowland
55000	0.194776	Lowland
55100	0.196415	Lowland
55200	0.196657	Lowland
55300	0.196576	Lowland
55400	0.19568	Lowland
55500	0.197053	Lowland
55600	0.196572	Lowland
55700	0.195939	Lowland
55800	0.195675	Lowland
55900	0.195835	Lowland
56000	0.195093	Lowland
56100	0.195713	Lowland
56200	0.194959	Lowland
56300	0.194129	Lowland
56400	0.19528	Lowland
56500	0.196078	Lowland
56600	0.195395	Lowland
56700	0.195859	Lowland
56800	0.195896	Lowland
56900	0.19527	Lowland
57000	0.195071	Lowland
57100	0.195482	Lowland
57200	0.194815	Lowland
57300	0.19432	Lowland
57400	0.194064	Lowland
57500	0.195651	Lowland
57600	0.194356	Lowland
57700	0.194046	Lowland
57800	0.193865	Lowland
57900	0.194023	Lowland
58000	0.194444	Lowland
58100	0.195109	Lowland
58200	0.194349	Lowland
58300	0.193697	Lowland
58400	0.193545	Lowland
58500	0.194542	Lowland
58600	0.194992	Lowland
58700	0.193227	Lowland
58800	0.193295	Lowland
58900	0.194183	Lowland
59000	0.194998	Lowland
59100	0.194256	Lowland
59200	0.19454	Lowland
59300	0.193869	Lowland
59400	0.193842	Lowland
59500	0.192938	Lowland
59600	0.192707	Lowland
59700	0.19385	Lowland
59800	0.193754	Lowland
59900	0.194336	Lowland
60000	0.193123	Lowland
60100	0.193346	Lowland
60200	0.194472	Lowland
60300	0.193225	Lowland
60400	0.19422	Lowland
60500	0.19263	Lowland
60600	0.193214	Lowland
60700	0.193199	Lowland
60800	0.191494	Lowland
60900	0.191582	Lowland
61000	0.191872	Lowland
61100	0.192929	Lowland
61200	0.193068	Lowland
61300	0.192353	Lowland
61400	0.191114	Lowland
61500	0.192681	Lowland
61600	0.192682	Lowland
61700	0.192364	Lowland
61800	0.192339	Lowland
61900	0.192731	Lowland
62000	0.191932	Lowland
62100	0.193237	Lowland
62200	0.191451	Lowland
62300	0.192108	Lowland
62400	0.192602	Lowland
62500	0.191819	Lowland
62600	0.192252	Lowland
62700	0.19248	Lowland
62800	0.191931	Lowland
62900	0.192447	Lowland
63000	0.192454	Lowland
63100	0.191807	Lowland
63200	0.191913	Lowland
63300	0.191973	Lowland
63400	0.191622	Lowland
63500	0.192154	Lowland
63600	0.191477	Lowland
63700	0.191922	Lowland
63800	0.191888	Lowland
63900	0.192116	Lowland
64000	0.193353	Lowland
64100	0.192543	Lowland
64200	0.190662	Lowland
64300	0.19045	Lowland
64400	0.190685	Lowland
64500	0.19134	Lowland
64600	0.191646	Lowland
64700	0.19024	Lowland
64800	0.190717	Lowland
64900	0.191321	Lowland
65000	0.191171	Lowland
65100	0.191039	Lowland
65200	0.190717	Lowland
65300	0.190466	Lowland
65400	0.191693	Lowland
65500	0.190557	Lowland
65600	0.190756	Lowland
65700	0.191533	Lowland
65800	0.190819	Lowland
65900	0.190652	Lowland
66000	0.191581	Lowland
66100	0.191139	Lowland
66200	0.190761	Lowland
66300	0.190684	Lowland
66400	0.190224	Lowland
66500	0.190349	Lowland
66600	0.189099	Lowland
66700	0.189149	Lowland
66800	0.189766	Lowland
66900	0.190223	Lowland
67000	0.189971	Lowland
67100	0.190068	Lowland
67200	0.190894	Lowland
67300	0.189686	Lowland
67400	0.188967	Lowland
67500	0.189807	Lowland
67600	0.190177	Lowland
67700	0.188666	Lowland
67800	0.189927	Lowland
67900	0.18863	Lowland
68000	0.1884	Lowland
68100	0.188628	Lowland
68200	0.188727	Lowland
68300	0.18903	Lowland
68400	0.188392	Lowland
68500	0.18896	Lowland
68600	0.188814	Lowland
68700	0.189229	Lowland
68800	0.187991	Lowland
68900	0.187699	Lowland
69000	0.188975	Lowland
69100	0.189565	Lowland
69200	0.188407	Lowland
69300	0.188898	Lowland
69400	0.188861	Lowland
69500	0.189496	Lowland
69600	0.189268	Lowland
69700	0.188694	Lowland
69800	0.188418	Lowland
69900	0.188762	Lowland
70000	0.189175	Lowland
70100	0.188745	Lowland
70200	0.18835	Lowland
70300	0.189277	Lowland
70400	0.188073	Lowland
70500	0.189193	Lowland
70600	0.188988	Lowland
70700	0.18934	Lowland
70800	0.187419	Lowland
70900	0.188229	Lowland
71000	0.187403	Lowland
71100	0.187138	Lowland
71200	0.187645	Lowland
71300	0.187855	Lowland
71400	0.186594	Lowland
71500	0.186898	Lowland
71600	0.18703	Lowland
71700	0.187824	Lowland
71800	0.187986	Lowland
71900	0.187034	Lowland
72000	0.187352	Lowland
72100	0.187669	Lowland
72200	0.188121	Lowland
72300	0.186914	Lowland
72400	0.187652	Lowland
72500	0.186477	Lowland
72600	0.186772	Lowland
72700	0.185981	Lowland
72800	0.187623	Lowland
72900	0.18725	Lowland
73000	0.186744	Lowland
73100	0.186747	Lowland
73200	0.186727	Lowland
73300	0.186139	Lowland
73400	0.186639	Lowland
73500	0.186633	Lowland
73600	0.186881	Lowland
73700	0.186089	Lowland
73800	0.186987	Lowland
73900	0.18659	Lowland
74000	0.187596	Lowland
74100	0.186713	Lowland
74200	0.186934	Lowland
74300	0.186429	Lowland
74400	0.18628	Lowland
74500	0.186206	Lowland
74600	0.186736	Lowland
74700	0.186711	Lowland
74800	0.186234	Lowland
74900	0.186169	Lowland
75000	0.184971	Lowland
75100	0.184126	Lowland
75200	0.18463	Lowland
75300	0.186023	Lowland
75400	0.186066	Lowland
75500	0.185543	Lowland
75600	0.1852	Lowland
75700	0.184626	Lowland
75800	0.185276	Lowland
75900	0.184739	Lowland
76000	0.184715	Lowland
76100	0.185299	Lowland
76200	0.184165	Lowland
76300	0.184937	Lowland
76400	0.185061	Lowland
76500	0.185153	Lowland
76600	0.185129	Lowland
76700	0.184355	Lowland
76800	0.184011	Lowland
76900	0.183746	Lowland
77000	0.184413	Lowland
77100	0.183938	Lowland
77200	0.184532	Lowland
77300	0.18434	Lowland
77400	0.184689	Lowland
77500	0.184063	Lowland
77600	0.183864	Lowland
77700	0.184245	Lowland
77800	0.184961	Lowland
77900	0.18482	Lowland
78000	0.183943	Lowland
78100	0.183202	Lowland
78200	0.182931	Lowland
78300	0.182972	Lowland
78400	0.182433	Lowland
78500	0.182704	Lowland
78600	0.182529	Lowland
78700	0.183415	Lowland
78800	0.183397	Lowland
78900	0.183535	Lowland
79000	0.183321	Lowland
79100	0.184255	Lowland
79200	0.184561	Lowland
79300	0.185335	Lowland
79400	0.184057	Lowland
79500	0.183119	Lowland
79600	0.183483	Lowland
79700	0.183227	Lowland
79800	0.183817	Lowland
79900	0.183686	Lowland
80000	0.183927	Lowland
80100	0.18444	Lowland
80200	0.184402	Lowland
80300	0.183146	Lowland
80400	0.183277	Lowland
80500	0.183491	Lowland
80600	0.184513	Lowland
80700	0.183968	Lowland
80800	0.183803	Lowland
80900	0.18314	Lowland
81000	0.183498	Lowland
81100	0.183085	Lowland
81200	0.184156	Lowland
81300	0.183443	Lowland
81400	0.182828	Lowland
81500	0.18226	Lowland
81600	0.183592	Lowland
81700	0.182927	Lowland
81800	0.182876	Lowland
81900	0.183778	Lowland
82000	0.18294	Lowland
82100	0.182919	Lowland
82200	0.184076	Lowland
82300	0.183287	Lowland
82400	0.182213	Lowland
82500	0.182903	Lowland
82600	0.182424	Lowland
82700	0.183124	Lowland
82800	0.183503	Lowland
82900	0.182492	Lowland
83000	0.182318	Lowland
83100	0.181833	Lowland
83200	0.181628	Lowland
83300	0.183305	Lowland
83400	0.182002	Lowland
83500	0.181759	Lowland
83600	0.181703	Lowland
83700	0.181259	Lowland
83800	0.181098	Lowland
83900	0.181694	Lowland
84000	0.181307	Lowland
84100	0.180928	Lowland
84200	0.180524	Lowland
84300	0.180247	Lowland
84400	0.180385	Lowland
84500	0.180774	Lowland
84600	0.180997	Lowland
84700	0.180684	Lowland
84800	0.1803	Lowland
84900	0.180901	Lowland
85000	0.180196	Lowland
85100	0.180759	Lowland
85200	0.181689	Lowland
85300	0.18089	Lowland
85400	0.1815	Lowland
85500	0.180561	Lowland
85600	0.181682	Lowland
85700	0.180983	Lowland
85800	0.180009	Lowland
85900	0.180528	Lowland
86000	0.179849	Lowland
86100	0.179398	Lowland
86200	0.181308	Lowland
86300	0.180378	Lowland
86400	0.180529	Lowland
86500	0.180214	Lowland
86600	0.181046	Lowland
86700	0.180193	Lowland
86800	0.180988	Lowland
86900	0.181243	Lowland
87000	0.181018	Lowland
87100	0.180611	Lowland
87200	0.181243	Lowland
87300	0.180622	Lowland
87400	0.179795	Lowland
87500	0.179773	Lowland
87600	0.179615	Lowland
87700	0.179863	Lowland
87800	0.180111	Lowland
87900	0.179969	Lowland
88000	0.180431	Lowland
88100	0.180346	Lowland
88200	0.179652	Lowland
88300	0.179842	Lowland
88400	0.179598	Lowland
88500	0.180121	Lowland
88600	0.179833	Lowland
88700	0.17866	Lowland
88800	0.17948	Lowland
88900	0.178794	Lowland
89000	0.178512	Lowland
89100	0.179506	Lowland
89200	0.179599	Lowland
89300	0.179292	Lowland
89400	0.178804	Lowland
89500	0.179396	Lowland
89600	0.178707	Lowland
89700	0.178406	Lowland
89800	0.179988	Lowland
89900	0.179283	Lowland
90000	0.179401	Lowland
90100	0.179308	Lowland
90200	0.178967	Lowland
90300	0.178028	Lowland
90400	0.17835	Lowland
90500	0.178311	Lowland
90600	0.178208	Lowland
90700	0.177433	Lowland
90800	0.177692	Lowland
90900	0.178175	Lowland
91000	0.177977	Lowland
91100	0.178412	Lowland
91200	0.177689	Lowland
91300	0.178004	Lowland
91400	0.178058	Lowland
91500	0.177982	Lowland
91600	0.177606	Lowland
91700	0.177685	Lowland
91800	0.179053	Lowland
91900	0.178248	Lowland
92000	0.178002	Lowland
92100	0.179169	Lowland
92200	0.177466	Lowland
92300	0.17773	Lowland
92400	0.178077	Lowland
92500	0.178193	Lowland
92600	0.178607	Lowland
92700	0.177764	Lowland
92800	0.177243	Lowland
92900	0.176906	Lowland
93000	0.177427	Lowland
93100	0.176577	Lowland
93200	0.176595	Lowland
93300	0.176023	Lowland
93400	0.176598	Lowland
93500	0.176725	Lowland
93600	0.175754	Lowland
93700	0.176622	Lowland
93800	0.17595	Lowland
93900	0.176811	Lowland
94000	0.17675	Lowland
94100	0.176044	Lowland
94200	0.176849	Lowland
94300	0.176175	Lowland
94400	0.176992	Lowland
94500	0.17651	Lowland
94600	0.176857	Lowland
94700	0.177508	Lowland
94800	0.176196	Lowland
94900	0.176122	Lowland
95000	0.176	Lowland
95100	0.176549	Lowland
95200	0.176672	Lowland
95300	0.175859	Lowland
95400	0.176819	Lowland
95500	0.176201	Lowland
95600	0.176471	Lowland
95700	0.175677	Lowland
95800	0.175935	Lowland
95900	0.175832	Lowland
96000	0.176249	Lowland
96100	0.176251	Lowland
96200	0.176588	Lowland
96300	0.177246	Lowland
96400	0.177448	Lowland
96500	0.176215	Lowland
96600	0.176241	Lowland
96700	0.176586	Lowland
96800	0.17698	Lowland
96900	0.177327	Lowland
97000	0.17689	Lowland
97100	0.176798	Lowland
97200	0.176649	Lowland
97300	0.175689	Lowland
97400	0.175944	Lowland
97500	0.176155	Lowland
97600	0.176533	Lowland
97700	0.176139	Lowland
97800	0.175502	Lowland
97900	0.175442	Lowland
98000	0.174418	Lowland
98100	0.174782	Lowland
98200	0.17491	Lowland
98300	0.174971	Lowland
98400	0.174054	Lowland
98500	0.173831	Lowland
98600	0.174126	Lowland
98700	0.174383	Lowland
98800	0.174021	Lowland
98900	0.174198	Lowland
99000	0.174069	Lowland
99100	0.17461	Lowland
99200	0.175128	Lowland
99300	0.174505	Lowland
99400	0.175013	Lowland
99500	0.173968	Lowland
99600	0.175574	Lowland
99700	0.175377	Lowland
99800	0.175374	Lowland
99900	0.17615	Lowland
100000	0.174792	Lowland
100100	0.174657	Lowland
100200	0.175245	Lowland
100300	0.17489	Lowland
100400	0.175418	Lowland
100500	0.174778	Lowland
100600	0.175289	Lowland
100700	0.175074	Lowland
100800	0.175212	Lowland
100900	0.174335	Lowland
101000	0.174919	Lowland
101100	0.175489	Lowland
101200	0.175734	Lowland
101300	0.175339	Lowland
101400	0.175437	Lowland
101500	0.175127	Lowland
101600	0.175826	Lowland
101700	0.175686	Lowland
101800	0.174547	Lowland
101900	0.174166	Lowland
102000	0.174163	Lowland
102100	0.174223	Lowland
102200	0.17353	Lowland
102300	0.173344	Lowland
102400	0.172876	Lowland
102500	0.173573	Lowland
102600	0.174211	Lowland
102700	0.174312	Lowland
102800	0.174248	Lowland
102900	0.173825	Lowland
103000	0.173976	Lowland
103100	0.172947	Lowland
103200	0.173474	Lowland
103300	0.173199	Lowland
103400	0.173064	Lowland
103500	0.172844	Lowland
103600	0.172813	Lowland
103700	0.173741	Lowland
103800	0.173224	Lowland
103900	0.174166	Lowland
104000	0.174192	Lowland
104100	0.173828	Lowland
104200	0.172901	Lowland
104300	0.173071	Lowland
104400	0.172803	Lowland
104500	0.172613	Lowland
104600	0.173514	Lowland
104700	0.172646	Lowland
104800	0.173103	Lowland
104900	0.173955	Lowland
105000	0.173393	Lowland
105100	0.172732	Lowland
105200	0.173376	Lowland
105300	0.173499	Lowland
105400	0.174122	Lowland
105500	0.173693	Lowland
105600	0.172614	Lowland
105700	0.173475	Lowland
105800	0.172025	Lowland
105900	0.174207	Lowland
106000	0.17372	Lowland
106100	0.173477	Lowland
106200	0.173246	Lowland
106300	0.173163	Lowland
106400	0.173265	Lowland
106500	0.172338	Lowland
106600	0.172003	Lowland
106700	0.171152	Lowland
106800	0.172397	Lowland
106900	0.172498	Lowland
107000	0.172269	Lowland
107100	0.171727	Lowland
107200	0.17058	Lowland
107300	0.171294	Lowland
107400	0.171566	Lowland
107500	0.170981	Lowland
107600	0.1722	Lowland
107700	0.172164	Lowland
107800	0.172473	Lowland
107900	0.171988	Lowland
108000	0.171812	Lowland
108100	0.172163	Lowland
108200	0.171679	Lowland
108300	0.171432	Lowland
108400	0.171111	Lowland
108500	0.170864	Lowland
108600	0.171188	Lowland
108700	0.171252	Lowland
108800	0.172279	Lowland
108900	0.172585	Lowland
109000	0.172139	Lowland
109100	0.171967	Lowland
109200	0.171374	Lowland
109300	0.171423	Lowland
109400	0.170874	Lowland
109500	0.171308	Lowland
109600	0.172618	Lowland
109700	0.172331	Lowland
109800	0.171783	Lowland
109900	0.172202	Lowland
110000	0.172293	Lowland
110100	0.171126	Lowland
110200	0.171952	Lowland
110300	0.172242	Lowland
110400	0.172183	Lowland
110500	0.1734	Lowland
110600	0.171649	Lowland
110700	0.17242	Lowland
110800	0.171155	Lowland
110900	0.171523	Lowland
111000	0.171984	Lowland
111100	0.172354	Lowland
111200	0.173025	Lowland
111300	0.171526	Lowland
111400	0.172088	Lowland
111500	0.172238	Lowland
111600	0.172397	Lowland
111700	0.172333	Lowland
111800	0.170821	Lowland
111900	0.171529	Lowland
112000	0.171146	Lowland
112100	0.170824	Lowland
112200	0.171333	Lowland
112300	0.171372	Lowland
112400	0.170879	Lowland
112500	0.171417	Lowland
112600	0.17103	Lowland
112700	0.170903	Lowland
112800	0.170455	Lowland
112900	0.170479	Lowland
113000	0.170518	Lowland
113100	0.17034	Lowland
113200	0.171158	Lowland
113300	0.171189	Lowland
113400	0.171368	Lowland
113500	0.170763	Lowland
113600	0.170545	Lowland
113700	0.171018	Lowland
113800	0.17127	Lowland
113900	0.1704	Lowland
114000	0.170755	Lowland
114100	0.170892	Lowland
114200	0.169927	Lowland
114300	0.169273	Lowland
114400	0.16967	Lowland
114500	0.169841	Lowland
114600	0.169613	Lowland
114700	0.170426	Lowland
114800	0.170015	Lowland
114900	0.169904	Lowland
115000	0.169015	Lowland
115100	0.168783	Lowland
115200	0.16989	Lowland
115300	0.169088	Lowland
115400	0.16958	Lowland
115500	0.170739	Lowland
115600	0.169306	Lowland
115700	0.169727	Lowland
115800	0.170024	Lowland
115900	0.168881	Lowland
116000	0.169134	Lowland
116100	0.169375	Lowland
116200	0.171133	Lowland
116300	0.170523	Lowland
116400	0.17001	Lowland
116500	0.17012	Lowland
116600	0.170141	Lowland
116700	0.169885	Lowland
116800	0.170151	Lowland
116900	0.170149	Lowland
117000	0.169386	Lowland
117100	0.169955	Lowland
117200	0.16998	Lowland
117300	0.170397	Lowland
117400	0.169948	Lowland
117500	0.170004	Lowland
117600	0.169954	Lowland
117700	0.169638	Lowland
117800	0.169649	Lowland
117900	0.170357	Lowland
118000	0.169701	Lowland
118100	0.169767	Lowland
118200	0.169659	Lowland
118300	0.170365	Lowland
118400	0.169852	Lowland
118500	0.169297	Lowland
118600	0.168822	Lowland
118700	0.168573	Lowland
118800	0.169517	Lowland
118900	0.169634	Lowland
119000	0.168889	Lowland
119100	0.169104	Lowland
119200	0.16788	Lowland
119300	0.16906	Lowland
119400	0.168769	Lowland
119500	0.16955	Lowland
119600	0.169786	Lowland
119700	0.168525	Lowland
119800	0.168766	Lowland
119900	0.16785	Lowland
120000	0.166924	Lowland
120100	0.167739	Lowland
120200	0.167118	Lowland
120300	0.166746	Lowland
120400	0.167537	Lowland
120500	0.167186	Lowland
120600	0.167581	Lowland
120700	0.168038	Lowland
120800	0.167117	Lowland
120900	0.167603	Lowland
121000	0.167482	Lowland
121100	0.16868	Lowland
121200	0.167085	Lowland
121300	0.166304	Lowland
121400	0.166725	Lowland
121500	0.166911	Lowland
121600	0.167054	Lowland
121700	0.166957	Lowland
121800	0.166839	Lowland
121900	0.166408	Lowland
122000	0.166916	Lowland
122100	0.167631	Lowland
122200	0.167126	Lowland
122300	0.167251	Lowland
122400	0.167264	Lowland
122500	0.167201	Lowland
122600	0.166727	Lowland
122700	0.16635	Lowland
122800	0.166743	Lowland
122900	0.16614	Lowland
123000	0.166939	Lowland
123100	0.167737	Lowland
123200	0.1667	Lowland
123300	0.166503	Lowland
123400	0.165527	Lowland
123500	0.166548	Lowland
123600	0.167092	Lowland
123700	0.166675	Lowland
123800	0.166643	Lowland
123900	0.166163	Lowland
124000	0.167463	Lowland
124100	0.167676	Lowland
124200	0.167028	Lowland
124300	0.166651	Lowland
124400	0.16623	Lowland
124500	0.16712	Lowland
124600	0.16709	Lowland
124700	0.167325	Lowland
124800	0.167766	Lowland
124900	0.166388	Lowland
125000	0.167066	Lowland
125100	0.165945	Lowland
125200	0.167182	Lowland
125300	0.167047	Lowland
125400	0.166236	Lowland
125500	0.166367	Lowland
125600	0.166339	Lowland
125700	0.165902	Lowland
125800	0.166067	Lowland
125900	0.165783	Lowland
126000	0.166558	Lowland
126100	0.165433	Lowland
126200	0.166208	Lowland
126300	0.165901	Lowland
126400	0.16613	Lowland
126500	0.166118	Lowland
126600	0.166505	Lowland
126700	0.166526	Lowland
126800	0.165749	Lowland
126900	0.165751	Lowland
127000	0.165262	Lowland
127100	0.165555	Lowland
127200	0.16511	Lowland
127300	0.16554	Lowland
127400	0.165079	Lowland
127500	0.164521	Lowland
127600	0.165544	Lowland
127700	0.165364	Lowland
127800	0.165506	Lowland
127900	0.165289	Lowland
128000	0.166195	Lowland
128100	0.165058	Lowland
128200	0.1652	Lowland
128300	0.164533	Lowland
128400	0.165379	Lowland
128500	0.165059	Lowland
128600	0.164582	Lowland
128700	0.164729	Lowland
128800	0.164714	Lowland
128900	0.164455	Lowland
129000	0.163872	Lowland
129100	0.164761	Lowland
129200	0.164869	Lowland
129300	0.164987	Lowland
129400	0.164969	Lowland
129500	0.164506	Lowland
129600	0.164947	Lowland
129700	0.165029	Lowland
129800	0.165059	Lowland
129900	0.164256	Lowland
130000	0.164533	Lowland
130100	0.164768	Lowland
130200	0.165191	Lowland
130300	0.16567	Lowland
130400	0.165596	Lowland
130500	0.166247	Lowland
130600	0.165502	Lowland
130700	0.166322	Lowland
130800	0.165956	Lowland
130900	0.16581	Lowland
131000	0.166001	Lowland
131100	0.164862	Lowland
131200	0.165732	Lowland
131300	0.165021	Lowland
131400	0.165101	Lowland
131500	0.165172	Lowland
131600	0.164549	Lowland
131700	0.16502	Lowland
131800	0.165609	Lowland
131900	0.165351	Lowland
132000	0.165371	Lowland
132100	0.164927	Lowland
132200	0.164923	Lowland
132300	0.164246	Lowland
132400	0.163529	Lowland
132500	0.165326	Lowland
132600	0.165166	Lowland
132700	0.165349	Lowland
132800	0.166199	Lowland
132900	0.164992	Lowland
133000	0.164135	Lowland
133100	0.164398	Lowland
133200	0.164193	Lowland
133300	0.164244	Lowland
133400	0.164432	Lowland
133500	0.164135	Lowland
133600	0.164264	Lowland
133700	0.163418	Lowland
133800	0.164313	Lowland
133900	0.165174	Lowland
134000	0.164496	Lowland
134100	0.16554	Lowland
134200	0.165287	Lowland
134300	0.165315	Lowland
134400	0.164642	Lowland
134500	0.164568	Lowland
134600	0.163871	Lowland
134700	0.164604	Lowland
134800	0.163852	Lowland
134900	0.164557	Lowland
135000	0.163922	Lowland
135100	0.164427	Lowland
135200	0.163696	Lowland
135300	0.164632	Lowland
135400	0.165155	Lowland
135500	0.164011	Lowland
135600	0.163576	Lowland
135700	0.163284	Lowland
135800	0.164305	Lowland
135900	0.163854	Lowland
136000	0.164248	Lowland
136100	0.163938	Lowland
136200	0.164144	Lowland
136300	0.164058	Lowland
136400	0.164435	Lowland
136500	0.164343	Lowland
136600	0.163018	Lowland
136700	0.163436	Lowland
136800	0.164279	Lowland
136900	0.163915	Lowland
137000	0.164018	Lowland
137100	0.163917	Lowland
137200	0.164412	Lowland
137300	0.162852	Lowland
137400	0.163717	Lowland
137500	0.16202	Lowland
137600	0.163426	Lowland
137700	0.162965	Lowland
137800	0.162916	Lowland
137900	0.161749	Lowland
138000	0.163384	Lowland
138100	0.163464	Lowland
138200	0.163523	Lowland
138300	0.163739	Lowland
138400	0.163615	Lowland
138500	0.163128	Lowland
138600	0.161825	Lowland
138700	0.163201	Lowland
138800	0.161977	Lowland
138900	0.16353	Lowland
139000	0.16356	Lowland
139100	0.162836	Lowland
139200	0.162558	Lowland
139300	0.162996	Lowland
139400	0.16277	Lowland
139500	0.161792	Lowland
139600	0.162718	Lowland
139700	0.164117	Lowland
139800	0.163366	Lowland
139900	0.16275	Lowland
140000	0.163465	Lowland
140100	0.162927	Lowland
140200	0.162612	Lowland
140300	0.162653	Lowland
140400	0.161876	Lowland
140500	0.163506	Lowland
140600	0.163003	Lowland
140700	0.164288	Lowland
140800	0.162964	Lowland
140900	0.163428	Lowland
141000	0.163172	Lowland
141100	0.162921	Lowland
141200	0.164052	Lowland
141300	0.163283	Lowland
141400	0.162355	Lowland
141500	0.162312	Lowland
141600	0.162022	Lowland
141700	0.162205	Lowland
141800	0.162368	Lowland
141900	0.16337	Lowland
142000	0.162882	Lowland
142100	0.163063	Lowland
142200	0.163875	Lowland
142300	0.163739	Lowland
142400	0.163744	Lowland
142500	0.163443	Lowland
142600	0.162248	Lowland
142700	0.162768	Lowland
142800	0.163185	Lowland
142900	0.163185	Lowland
143000	0.162538	Lowland
143100	0.162757	Lowland
143200	0.162571	Lowland
143300	0.162248	Lowland
143400	0.162167	Lowland
143500	0.162405	Lowland
143600	0.162213	Lowland
143700	0.162491	Lowland
143800	0.162288	Lowland
143900	0.161314	Lowland
144000	0.16234	Lowland
144100	0.161467	Lowland
144200	0.161135	Lowland
144300	0.16207	Lowland
144400	0.162562	Lowland
144500	0.163118	Lowland
144600	0.162561	Lowland
144700	0.161604	Lowland
144800	0.161577	Lowland
144900	0.162448	Lowland
145000	0.161925	Lowland
145100	0.161395	Lowland
145200	0.161541	Lowland
145300	0.161451	Lowland
145400	0.16203	Lowland
145500	0.161071	Lowland
145600	0.161575	Lowland
145700	0.162233	Lowland
145800	0.161979	Lowland
145900	0.161054	Lowland
146000	0.162061	Lowland
146100	0.162669	Lowland
146200	0.163186	Lowland
146300	0.162793	Lowland
146400	0.16235	Lowland
146500	0.162	Lowland
146600	0.162061	Lowland
146700	0.161716	Lowland
146800	0.161429	Lowland
146900	0.161582	Lowland
147000	0.161112	Lowland
147100	0.161192	Lowland
147200	0.161235	Lowland
147300	0.16168	Lowland
147400	0.161038	Lowland
147500	0.160888	Lowland
147600	0.161373	Lowland
147700	0.161223	Lowland
147800	0.161355	Lowland
147900	0.160954	Lowland
148000	0.16143	Lowland
148100	0.160807	Lowland
148200	0.161497	Lowland
148300	0.16161	Lowland
148400	0.161107	Lowland
148500	0.160652	Lowland
148600	0.160723	Lowland
148700	0.160075	Lowland
148800	0.161527	Lowland
148900	0.161011	Lowland
149000	0.159617	Lowland
149100	0.160824	Lowland
149200	0.160657	Lowland
149300	0.161506	Lowland
149400	0.160587	Lowland
149500	0.160794	Lowland
149600	0.16148	Lowland
149700	0.160621	Lowland
149800	0.16097	Lowland
149900	0.160355	Lowland
150000	0.1612	Lowland
150100	0.160861	Lowland
150200	0.159693	Lowland
150300	0.159639	Lowland
150400	0.159878	Lowland
150500	0.160167	Lowland
150600	0.160189	Lowland
150700	0.159619	Lowland
150800	0.159988	Lowland
150900	0.159545	Lowland
151000	0.159771	Lowland
151100	0.16055	Lowland
151200	0.159833	Lowland
151300	0.16008	Lowland
151400	0.16035	Lowland
151500	0.160848	Lowland
151600	0.159823	Lowland
151700	0.160103	Lowland
151800	0.1604	Lowland
151900	0.160639	Lowland
152000	0.160314	Lowland
152100	0.160751	Lowland
152200	0.160597	Lowland
152300	0.16029	Lowland
152400	0.159538	Lowland
152500	0.160877	Lowland
152600	0.159488	Lowland
152700	0.159941	Lowland
152800	0.15951	Lowland
152900	0.160806	Lowland
153000	0.159742	Lowland
153100	0.160227	Lowland
153200	0.159339	Lowland
153300	0.15901	Lowland
153400	0.159157	Lowland
153500	0.159537	Lowland
153600	0.159301	Lowland
153700	0.159369	Lowland
153800	0.160141	Lowland
153900	0.160467	Lowland
154000	0.160365	Lowland
154100	0.159655	Lowland
154200	0.1602	Lowland
154300	0.159747	Lowland
154400	0.16031	Lowland
154500	0.160286	Lowland
154600	0.160661	Lowland
154700	0.161479	Lowland
154800	0.15973	Lowland
154900	0.160651	Lowland
155000	0.160769	Lowland
155100	0.159955	Lowland
155200	0.159901	Lowland
155300	0.160886	Lowland
155400	0.159971	Lowland
155500	0.159472	Lowland
155600	0.160294	Lowland
155700	0.159062	Lowland
155800	0.158596	Lowland
155900	0.159238	Lowland
156000	0.159543	Lowland
156100	0.159372	Lowland
156200	0.158484	Lowland
156300	0.15927	Lowland
156400	0.158952	Lowland
156500	0.15984	Lowland
156600	0.158698	Lowland
156700	0.158688	Lowland
156800	0.158238	Lowland
156900	0.159519	Lowland
157000	0.159976	Lowland
157100	0.160109	Lowland
157200	0.158841	Lowland
157300	0.158378	Lowland
157400	0.158729	Lowland
157500	0.158303	Lowland
157600	0.158726	Lowland
157700	0.159021	Lowland
157800	0.158817	Lowland
157900	0.159475	Lowland
158000	0.159541	Lowland
158100	0.158271	Lowland
158200	0.159135	Lowland
158300	0.158785	Lowland
158400	0.159886	Lowland
158500	0.159054	Lowland
158600	0.159188	Lowland
158700	0.159812	Lowland
158800	0.158769	Lowland
158900	0.159069	Lowland
159000	0.157936	Lowland
159100	0.157488	Lowland
159200	0.158195	Lowland
159300	0.159013	Lowland
159400	0.158235	Lowland
159500	0.157843	Lowland
159600	0.15819	Lowland
159700	0.158957	Lowland
159800	0.158497	Lowland
159900	0.158193	Lowland
160000	0.158666	Lowland
160100	0.157114	Lowland
160200	0.157447	Lowland
160300	0.15838	Lowland
160400	0.157913	Lowland
160500	0.159093	Lowland
160600	0.157179	Lowland
160700	0.157548	Lowland
160800	0.157035	Lowland
160900	0.157863	Lowland
161000	0.158329	Lowland
161100	0.158026	Lowland
161200	0.158491	Lowland
161300	0.157148	Lowland
161400	0.157643	Lowland
161500	0.156329	Lowland
161600	0.156124	Lowland
161700	0.155693	Lowland
161800	0.156161	Lowland
161900	0.156103	Lowland
162000	0.155827	Lowland
162100	0.156793	Lowland
162200	0.156344	Lowland
162300	0.157022	Lowland
162400	0.157623	Lowland
162500	0.156464	Lowland
162600	0.156933	Lowland
162700	0.157567	Lowland
162800	0.157717	Lowland
162900	0.15739	Lowland
163000	0.157293	Lowland
163100	0.157573	Lowland
163200	0.157218	Lowland
163300	0.157051	Lowland
163400	0.157253	Lowland
163500	0.157348	Lowland
163600	0.156987	Lowland
163700	0.156994	Lowland
163800	0.157305	Lowland
163900	0.157173	Lowland
164000	0.156809	Lowland
164100	0.156057	Lowland
164200	0.155801	Lowland
164300	0.1562	Lowland
164400	0.156255	Lowland
164500	0.15695	Lowland
164600	0.155835	Lowland
164700	0.155425	Lowland
164800	0.157012	Lowland
164900	0.156439	Lowland
165000	0.15606	Lowland
165100	0.155356	Lowland
165200	0.155992	Lowland
165300	0.155741	Lowland
165400	0.157173	Lowland
165500	0.157078	Lowland
165600	0.15655	Lowland
165700	0.155809	Lowland
165800	0.156343	Lowland
165900	0.155605	Lowland
166000	0.155215	Lowland
166100	0.154844	Lowland
166200	0.155638	Lowland
166300	0.155661	Lowland
166400	0.155576	Lowland
166500	0.154995	Lowland
166600	0.155359	Lowland
166700	0.155027	Lowland
166800	0.155351	Lowland
166900	0.15454	Lowland
167000	0.154291	Lowland
167100	0.154139	Lowland
167200	0.15496	Lowland
167300	0.155461	Lowland
167400	0.155678	Lowland
167500	0.155684	Lowland
167600	0.156106	Lowland
167700	0.155525	Lowland
167800	0.155153	Lowland
167900	0.154985	Lowland
168000	0.155467	Lowland
168100	0.154793	Lowland
168200	0.155312	Lowland
168300	0.155073	Lowland
168400	0.1559	Lowland
168500	0.155497	Lowland
168600	0.154922	Lowland
168700	0.154557	Lowland
168800	0.155476	Lowland
168900	0.155647	Lowland
169000	0.156191	Lowland
169100	0.155329	Lowland
169200	0.154178	Lowland
169300	0.154849	Lowland
169400	0.154472	Lowland
169500	0.154538	Lowland
169600	0.154497	Lowland
169700	0.154383	Lowland
169800	0.154823	Lowland
169900	0.155934	Lowland
170000	0.155277	Lowland
170100	0.155694	Lowland
170200	0.155191	Lowland
170300	0.154661	Lowland
170400	0.155536	Lowland
170500	0.155096	Lowland
170600	0.154773	Lowland
170700	0.155093	Lowland
170800	0.154926	Lowland
170900	0.154631	Lowland
171000	0.154756	Lowland
171100	0.154549	Lowland
171200	0.154659	Lowland
171300	0.154713	Lowland
171400	0.153787	Lowland
171500	0.154365	Lowland
171600	0.154381	Lowland
171700	0.15441	Lowland
171800	0.154465	Lowland
171900	0.154856	Lowland
172000	0.154736	Lowland
172100	0.154538	Lowland
172200	0.155183	Lowland
172300	0.154982	Lowland
172400	0.154135	Lowland
172500	0.154839	Lowland
172600	0.154451	Lowland
172700	0.153997	Lowland
172800	0.153727	Lowland
172900	0.153759	Lowland
173000	0.154013	Lowland
173100	0.153551	Lowland
173200	0.154262	Lowland
173300	0.15412	Lowland
173400	0.154439	Lowland
173500	0.1542	Lowland
173600	0.153925	Lowland
173700	0.154641	Lowland
173800	0.154229	Lowland
173900	0.154395	Lowland
174000	0.15464	Lowland
174100	0.154615	Lowland
174200	0.154525	Lowland
174300	0.154234	Lowland
174400	0.15388	Lowland
174500	0.154508	Lowland
174600	0.154831	Lowland
174700	0.154046	Lowland
174800	0.153865	Lowland
174900	0.153471	Lowland
175000	0.154973	Lowland
175100	0.154752	Lowland
175200	0.153907	Lowland
175300	0.154142	Lowland
175400	0.154165	Lowland
175500	0.15403	Lowland
175600	0.154855	Lowland
175700	0.154736	Lowland
175800	0.154769	Lowland
175900	0.156024	Lowland
176000	0.155332	Lowland
176100	0.154644	Lowland
176200	0.153481	Lowland
176300	0.153428	Lowland
176400	0.153468	Lowland
176500	0.152974	Lowland
176600	0.153953	Lowland
176700	0.153144	Lowland
176800	0.154313	Lowland
176900	0.15337	Lowland
177000	0.153393	Lowland
177100	0.153544	Lowland
177200	0.153069	Lowland
177300	0.153416	Lowland
177400	0.153104	Lowland
177500	0.153542	Lowland
177600	0.153872	Lowland
177700	0.153302	Lowland
177800	0.153485	Lowland
177900	0.152952	Lowland
178000	0.154806	Lowland
178100	0.15428	Lowland
178200	0.154196	Lowland
178300	0.153683	Lowland
178400	0.152706	Lowland
178500	0.153795	Lowland
178600	0.154095	Lowland
178700	0.152859	Lowland
178800	0.152635	Lowland
178900	0.153027	Lowland
179000	0.153881	Lowland
179100	0.152876	Lowland
179200	0.152662	Lowland
179300	0.153645	Lowland
179400	0.153253	Lowland
179500	0.153852	Lowland
179600	0.152866	Lowland
179700	0.153065	Lowland
179800	0.154204	Lowland
179900	0.153279	Lowland
180000	0.153674	Lowland
180100	0.153904	Lowland
180200	0.153297	Lowland
180300	0.154571	Lowland
180400	0.15393	Lowland
180500	0.153623	Lowland
180600	0.153576	Lowland
180700	0.153476	Lowland
180800	0.152675	Lowland
180900	0.153093	Lowland
181000	0.152917	Lowland
181100	0.15272	Lowland
181200	0.153564	Lowland
181300	0.15364	Lowland
181400	0.153412	Lowland
181500	0.153982	Lowland
181600	0.153691	Lowland
181700	0.153811	Lowland
181800	0.153674	Lowland
181900	0.153925	Lowland
182000	0.153923	Lowland
182100	0.153488	Lowland
182200	0.153244	Lowland
182300	0.153265	Lowland
182400	0.153517	Lowland
182500	0.153925	Lowland
182600	0.153514	Lowland
182700	0.15283	Lowland
182800	0.153425	Lowland
182900	0.153515	Lowland
183000	0.153073	Lowland
183100	0.152702	Lowland
183200	0.151983	Lowland
183300	0.151998	Lowland
183400	0.153358	Lowland
183500	0.153057	Lowland
183600	0.15245	Lowland
183700	0.153212	Lowland
183800	0.15336	Lowland
183900	0.152242	Lowland
184000	0.153856	Lowland
184100	0.151991	Lowland
184200	0.153618	Lowland
184300	0.152955	Lowland
184400	0.153115	Lowland
184500	0.153312	Lowland
184600	0.152982	Lowland
184700	0.152614	Lowland
184800	0.1521	Lowland
184900	0.152086	Lowland
185000	0.152337	Lowland
185100	0.152468	Lowland
185200	0.152883	Lowland
185300	0.152339	Lowland
185400	0.152714	Lowland
185500	0.152407	Lowland
185600	0.152634	Lowland
185700	0.151932	Lowland
185800	0.152061	Lowland
185900	0.152988	Lowland
186000	0.152868	Lowland
186100	0.15313	Lowland
186200	0.152549	Lowland
186300	0.152376	Lowland
186400	0.152194	Lowland
186500	0.153028	Lowland
186600	0.152829	Lowland
186700	0.152996	Lowland
186800	0.152401	Lowland
186900	0.152297	Lowland
187000	0.152981	Lowland
187100	0.153243	Lowland
187200	0.152035	Lowland
187300	0.152908	Lowland
187400	0.153041	Lowland
187500	0.152429	Lowland
187600	0.152387	Lowland
187700	0.15346	Lowland
187800	0.15346	Lowland
187900	0.152545	Lowland
188000	0.152441	Lowland
188100	0.151684	Lowland
188200	0.152594	Lowland
188300	0.152759	Lowland
188400	0.152867	Lowland
188500	0.152553	Lowland
188600	0.152155	Lowland
188700	0.152291	Lowland
188800	0.152698	Lowland
188900	0.152194	Lowland
189000	0.152909	Lowland
189100	0.153128	Lowland
189200	0.152929	Lowland
189300	0.153138	Lowland
189400	0.153133	Lowland
189500	0.153362	Lowland
189600	0.152451	Lowland
189700	0.152372	Lowland
189800	0.151865	Lowland
189900	0.152238	Lowland
190000	0.152061	Lowland
190100	0.152216	Lowland
190200	0.152682	Lowland
190300	0.151628	Lowland
190400	0.152371	Lowland
190500	0.152169	Lowland
190600	0.152072	Lowland
190700	0.152237	Lowland
190800	0.152881	Lowland
190900	0.152857	Lowland
191000	0.152198	Lowland
191100	0.15207	Lowland
191200	0.152107	Lowland
191300	0.15256	Lowland
191400	0.151817	Lowland
191500	0.151975	Lowland
191600	0.151552	Lowland
191700	0.152138	Lowland
191800	0.152039	Lowland
191900	0.152275	Lowland
192000	0.151619	Lowland
192100	0.152526	Lowland
192200	0.151505	Lowland
192300	0.151872	Lowland
192400	0.151392	Lowland
192500	0.150914	Lowland
192600	0.15148	Lowland
192700	0.151573	Lowland
192800	0.15123	Lowland
192900	0.15106	Lowland
193000	0.152056	Lowland
193100	0.152399	Lowland
193200	0.153007	Lowland
193300	0.152119	Lowland
193400	0.151207	Lowland
193500	0.152045	Lowland
193600	0.150965	Lowland
193700	0.150602	Lowland
193800	0.150492	Lowland
193900	0.150637	Lowland
194000	0.150873	Lowland
194100	0.151386	Lowland
194200	0.151391	Lowland
194300	0.152233	Lowland
194400	0.151128	Lowland
194500	0.151322	Lowland
194600	0.152057	Lowland
194700	0.151569	Lowland
194800	0.151857	Lowland
194900	0.152166	Lowland
195000	0.151434	Lowland
195100	0.152314	Lowland
195200	0.15278	Lowland
195300	0.152089	Lowland
195400	0.152095	Lowland
195500	0.151457	Lowland
195600	0.151094	Lowland
195700	0.150671	Lowland
195800	0.151537	Lowland
195900	0.151177	Lowland
196000	0.150875	Lowland
196100	0.150994	Lowland
196200	0.150988	Lowland
196300	0.150951	Lowland
196400	0.151046	Lowland
196500	0.150975	Lowland
196600	0.151666	Lowland
196700	0.150291	Lowland
196800	0.151054	Lowland
196900	0.151488	Lowland
197000	0.150669	Lowland
197100	0.150272	Lowland
197200	0.15141	Lowland
197300	0.151201	Lowland
197400	0.150577	Lowland
197500	0.150166	Lowland
197600	0.151332	Lowland
197700	0.150852	Lowland
197800	0.150423	Lowland
197900	0.150035	Lowland
198000	0.15039	Lowland
198100	0.15058	Lowland
198200	0.15095	Lowland
198300	0.150598	Lowland
198400	0.150172	Lowland
198500	0.15096	Lowland
198600	0.150296	Lowland
198700	0.149495	Lowland
198800	0.15006	Lowland
[truncated: 4,023 more rows]
