# Supplementary material for: Genome-wide association study in quinoa reveals selection pattern typical for crops with a short breeding history
Source: eLife. 2022 Jul 8;11:e66873. doi: 10.7554/eLife.66873 (PMC9388097; doi:10.7554/eLife.66873)
Supplement: Figure 1—source data 3. — Model-based clustering was done in ADMIXTURE with different numbers of ancestral kinships. [file elife-66873-fig1-data3.xlsx]

## Sheet: Sheet1
Fig. 1c-Source data 1c
Fig.1c: Population structure is based on ten subsets of SNPs, each containing 50,000 SNPs from the whole-genome SNP data. Model-based clustering was done in ADMIXTURE with different numbers of ancestral kinships
id	country	Type	accession	Population	Ancestry	likely_assignment	assingment_prob	K_no_of_pop
10190	Unknown	lowland	Ku-2-Q5	K2	1	K2	1	k2
10191	Unknown	lowland	Ames	K2	1	K2	1	k2
S1A5	Unknown	lowland	NSL-86628	K2	1	K2	1	k2
S1A6	United States	lowland	Ames-13744	K2	1	K2	1	k2
S1A9	Chile	lowland	BO-16	K2	1	K2	1	k2
S1B1	Bolivia	lowland	PI-614927	K2	1	K2	1	k2
S1B9	Chile	lowland	PI-584524	K2	1	K2	1	k2
S1C1	Unknown	lowland	ICBA-Q5	K2	1	K2	1	k2
S1C9	Chile	lowland	PI-614885	K2	1	K2	1	k2
S1D10	Chile	lowland	BO-13	K2	1	K2	1	k2
S1D1	Chile	lowland	PI-614889	K2	1	K2	1	k2
S1D3	Unknown	lowland	E-DK-4	K2	1	K2	1	k2
S1D4	Unknown	lowland	CHEN-5	K2	1	K2	1	k2
S1D5	United Kingdom	lowland	RU-5	K2	1	K2	1	k2
S1D6	Unknown	lowland	Oro-de-Valle	K2	1	K2	1	k2
S1E3	Chile	lowland	Javi	K2	1	K2	1	k2
S1E4	Unknown	lowland	Indian Quinoa	K2	1	K2	1	k2
S1E6	United States	lowland	Ames-13745	K2	1	K2	1	k2
S1F9	Unknown	lowland	CHEN-33	K2	1	K2	1	k2
S1G1	Chile	lowland	BO-55	K2	1	K2	1	k2
S1G3	Unknown	lowland	Baer-II	K2	1	K2	1	k2
S1G5	Unknown	lowland	Brightest-Brilliant-Rainbow	K2	1	K2	1	k2
S1G7	Chile	lowland	PI-634917	K2	1	K2	1	k2
S1G8	Chile	lowland	PUC-mix-green	K2	1	K2	1	k2
S1H1	Unknown	lowland	Ames19047	K2	1	K2	1	k2
S1H5	Chile	lowland	PI-614887	K2	1	K2	1	k2
S1H6	Chile	lowland	BO-40	K2	1	K2	1	k2
S1H9	Chile	lowland	PI-634924	K2	1	K2	1	k2
S2D1	Chile	lowland	BO-46-2	K2	1	K2	1	k2
S2D3	Unknown	lowland	Redhead	K2	1	K2	1	k2
S2F11	Chile	lowland	BO-63	K2	1	K2	1	k2
S2F1	Chile	lowland	PI-634923	K2	1	K2	1	k2
S2F3	Unknown	lowland	CHEN-64	K2	1	K2	1	k2
S2F4	Unknown	lowland	PI584524	K2	1	K2	1	k2
S2G2	Chile	lowland	BO-03	K2	1	K2	1	k2
S2H11	Chile	lowland	PI-634919	K2	1	K2	1	k2
S3A6	Unknown	lowland	Bouchane-1	K2	1	K2	1	k2
S3D5	United States	lowland	Ames-13757	K2	1	K2	1	k2
S3E4	Bolivia	lowland	CHEN-140	K2	1	K2	1	k2
S3E6	Peru	lowland	D-11985	K2	1	K2	1	k2
S3F1	United States	lowland	Ames-13732	K2	1	K2	1	k2
S3G4	Peru	lowland	PI-510545	K2	1	K2	1	k2
S3G6	Ecuador	lowland	PI-674266	K2	1	K2	1	k2
S3H5	Peru	lowland	CHEN-344	K2	1	K2	1	k2
S4B6	Denmark	lowland	S4B6	K2	1	K2	1	k2
S4B7	United States	lowland	PI-665283	K2	1	K2	1	k2
S4B8	Chile	lowland	BO-17	K2	1	K2	1	k2
S4C8	Argentina	lowland	D-12282	K2	1	K2	1	k2
S4D8	United Kingdom	lowland	RU-2	K2	1	K2	1	k2
S4F11	United States	lowland	Ames-13737	K2	1	K2	1	k2
S4G8	Chile	lowland	Nde-09	K2	1	K2	1	k2
10190	Unknown	lowland	Ku-2-Q5	K3	0	K2	1	k2
10191	Unknown	lowland	Ames	K3	0	K2	1	k2
S1A5	Unknown	lowland	NSL-86628	K3	0	K2	1	k2
S1A6	United States	lowland	Ames-13744	K3	0	K2	1	k2
S1A9	Chile	lowland	BO-16	K3	0	K2	1	k2
S1B1	Bolivia	lowland	PI-614927	K3	0	K2	1	k2
S1B9	Chile	lowland	PI-584524	K3	0	K2	1	k2
S1C1	Unknown	lowland	ICBA-Q5	K3	0	K2	1	k2
S1C9	Chile	lowland	PI-614885	K3	0	K2	1	k2
S1D10	Chile	lowland	BO-13	K3	0	K2	1	k2
S1D1	Chile	lowland	PI-614889	K3	0	K2	1	k2
S1D3	Unknown	lowland	E-DK-4	K3	0	K2	1	k2
S1D4	Unknown	lowland	CHEN-5	K3	0	K2	1	k2
S1D5	United Kingdom	lowland	RU-5	K3	0	K2	1	k2
S1D6	Unknown	lowland	Oro-de-Valle	K3	0	K2	1	k2
S1E3	Chile	lowland	Javi	K3	0	K2	1	k2
S1E4	Unknown	lowland	Indian Quinoa	K3	0	K2	1	k2
S1E6	United States	lowland	Ames-13745	K3	0	K2	1	k2
S1F9	Unknown	lowland	CHEN-33	K3	0	K2	1	k2
S1G1	Chile	lowland	BO-55	K3	0	K2	1	k2
S1G3	Unknown	lowland	Baer-II	K3	0	K2	1	k2
S1G5	Unknown	lowland	Brightest-Brilliant-Rainbow	K3	0	K2	1	k2
S1G7	Chile	lowland	PI-634917	K3	0	K2	1	k2
S1G8	Chile	lowland	PUC-mix-green	K3	0	K2	1	k2
S1H1	Unknown	lowland	Ames19047	K3	0	K2	1	k2
S1H5	Chile	lowland	PI-614887	K3	0	K2	1	k2
S1H6	Chile	lowland	BO-40	K3	0	K2	1	k2
S1H9	Chile	lowland	PI-634924	K3	0	K2	1	k2
S2D1	Chile	lowland	BO-46-2	K3	0	K2	1	k2
S2D3	Unknown	lowland	Redhead	K3	0	K2	1	k2
S2F11	Chile	lowland	BO-63	K3	0	K2	1	k2
S2F1	Chile	lowland	PI-634923	K3	0	K2	1	k2
S2F3	Unknown	lowland	CHEN-64	K3	0	K2	1	k2
S2F4	Unknown	lowland	PI584524	K3	0	K2	1	k2
S2G2	Chile	lowland	BO-03	K3	0	K2	1	k2
S2H11	Chile	lowland	PI-634919	K3	0	K2	1	k2
S3A6	Unknown	lowland	Bouchane-1	K3	0	K2	1	k2
S3D5	United States	lowland	Ames-13757	K3	0	K2	1	k2
S3E4	Bolivia	lowland	CHEN-140	K3	0	K2	1	k2
S3E6	Peru	lowland	D-11985	K3	0	K2	1	k2
S3F1	United States	lowland	Ames-13732	K3	0	K2	1	k2
S3G4	Peru	lowland	PI-510545	K3	0	K2	1	k2
S3G6	Ecuador	lowland	PI-674266	K3	0	K2	1	k2
S3H5	Peru	lowland	CHEN-344	K3	0	K2	1	k2
S4B6	Denmark	lowland	S4B6	K3	0	K2	1	k2
S4B7	United States	lowland	PI-665283	K3	0	K2	1	k2
S4B8	Chile	lowland	BO-17	K3	0	K2	1	k2
S4C8	Argentina	lowland	D-12282	K3	0	K2	1	k2
S4D8	United Kingdom	lowland	RU-2	K3	0	K2	1	k2
S4F11	United States	lowland	Ames-13737	K3	0	K2	1	k2
S4G8	Chile	lowland	Nde-09	K3	0	K2	1	k2
S2G1	Chile	lowland	PI-614888	K2	0.9998	K2	0.9998	k2
S2G1	Chile	lowland	PI-614888	K3	0.0002	K2	0.9998	k2
S2A4	United States	lowland	Ames-13731	K2	0.9986	K2	0.9986	k2
S2A4	United States	lowland	Ames-13731	K3	0.0014	K2	0.9986	k2
S2F5	Chile	lowland	BO-30	K2	0.9984	K2	0.9984	k2
S2F5	Chile	lowland	BO-30	K3	0.0016	K2	0.9984	k2
S2C10	Argentina	lowland	D-11889	K2	0.9968	K2	0.9968	k2
S2C10	Argentina	lowland	D-11889	K3	0.0032	K2	0.9968	k2
S2A6	Unknown	lowland	NSL-91567	K2	0.9951	K2	0.9951	k2
S2A6	Unknown	lowland	NSL-91567	K3	0.0049	K2	0.9951	k2
S4H9	Chile	lowland	BO-11	K2	0.9946	K2	0.9946	k2
S4H9	Chile	lowland	BO-11	K3	0.0054	K2	0.9946	k2
S2H3	Chile	lowland	PI-634925	K2	0.9941	K2	0.9941	k2
S2H3	Chile	lowland	PI-634925	K3	0.0059	K2	0.9941	k2
S2E1	Unknown	lowland	NSL-86649	K2	0.9898	K2	0.9898	k2
S2E1	Unknown	lowland	NSL-86649	K3	0.0102	K2	0.9898	k2
S4D9	Chile	lowland	PI-614882	K2	0.9895	K2	0.9895	k2
S4D9	Chile	lowland	PI-614882	K3	0.0105	K2	0.9895	k2
S2B2	Chile	lowland	BO-32	K2	0.9869	K2	0.9869	k2
S2B2	Chile	lowland	BO-32	K3	0.0131	K2	0.9869	k2
S2D5	Argentina	lowland	PI-614883	K2	0.9828	K2	0.9828	k2
S2D5	Argentina	lowland	PI-614883	K3	0.0172	K2	0.9828	k2
S2G10	Chile	lowland	BO-51	K2	0.9781	K2	0.9781	k2
S2G10	Chile	lowland	BO-51	K3	0.0219	K2	0.9781	k2
S2E11	Chile	lowland	BO-42	K2	0.9779	K2	0.9779	k2
S2E11	Chile	lowland	BO-42	K3	0.0221	K2	0.9779	k2
S2B1	Chile	lowland	PI-614880	K2	0.9692	K2	0.9692	k2
S2B1	Chile	lowland	PI-614880	K3	0.0308	K2	0.9692	k2
S3A7	Peru	lowland	D-12177	K2	0.9633	K2	0.9633	k2
S3A7	Peru	lowland	D-12177	K3	0.0367	K2	0.9633	k2
S4A7	Unknown	lowland	EMBRAPA-Brazil	K2	0.9321	K2	0.9321	k2
S4A7	Unknown	lowland	EMBRAPA-Brazil	K3	0.0679	K2	0.9321	k2
S2G6	United States	lowland	Ames-13761	K2	0.9142	K2	0.9142	k2
S2G6	United States	lowland	Ames-13761	K3	0.0858	K2	0.9142	k2
S1F1	Unknown	lowland	Moroccan Yellow	K2	0.9085	K2	0.9085	k2
S1F1	Unknown	lowland	Moroccan Yellow	K3	0.0915	K2	0.9085	k2
S1B8	Chile	lowland	Ames-13743	K2	0.9046	K2	0.9046	k2
S1B8	Chile	lowland	Ames-13743	K3	0.0954	K2	0.9046	k2
S2E5	Unknown	lowland	Bouchane-4	K2	0.8935	K2	0.8935	k2
S2E5	Unknown	lowland	Bouchane-4	K3	0.1065	K2	0.8935	k2
S1A8	Chile	lowland	BO-58	K2	0.862	K2	0.862	k2
S1A8	Chile	lowland	BO-58	K3	0.138	K2	0.862	k2
S1F6	United States	lowland	Ames-13721	K2	0.8519	K2	0.8519	k2
S1F6	United States	lowland	Ames-13721	K3	0.1481	K2	0.8519	k2
S1F7	United States	lowland	Ames-13738	K2	0.8195	K2	0.8195	k2
S1F7	United States	lowland	Ames-13738	K3	0.1805	K2	0.8195	k2
S2A7	United States	lowland	Ames-13758	K2	0.804	K2	0.804	k2
S2A7	United States	lowland	Ames-13758	K3	0.196	K2	0.804	k2
10179	Unknown	wild	C. berliandieri boscianum	K2	0.8018	K2	0.8018	k2
10179	Unknown	wild	C. berliandieri boscianum	K3	0.1982	K2	0.8018	k2
10186	Unknown	wild	C. berliandieri zschacker	K2	0.8	K2	0.8	k2
10186	Unknown	wild	C. berliandieri zschacker	K3	0.2	K2	0.8	k2
10180	Unknown	wild	C. berliandieri macro	K2	0.7921	K2	0.7921	k2
10180	Unknown	wild	C. berliandieri macro	K3	0.2079	K2	0.7921	k2
S1B3	United States	lowland	Ames-13734	K2	0.7904	K2	0.7904	k2
S1B3	United States	lowland	Ames-13734	K3	0.2096	K2	0.7904	k2
10192	Unknown	wild	C. berliandieri sinuatum	K2	0.7841	K2	0.7841	k2
10192	Unknown	wild	C. berliandieri sinuatum	K3	0.2159	K2	0.7841	k2
S1E9	Denmark	lowland	Vikinga	K2	0.7705	K2	0.7705	k2
S1E9	Denmark	lowland	Vikinga	K3	0.2295	K2	0.7705	k2
10187	Unknown	wild	C. berliandieri nuttaliae	K2	0.7695	K2	0.7695	k2
10187	Unknown	wild	C. berliandieri nuttaliae	K3	0.2305	K2	0.7695	k2
S2C6	United States	lowland	Ames-13751	K2	0.7538	K2	0.7538	k2
S2C6	United States	lowland	Ames-13751	K3	0.2462	K2	0.7538	k2
S4F8	United States	lowland	Ames-13742	K2	0.731	K2	0.731	k2
S4F8	United States	lowland	Ames-13742	K3	0.269	K2	0.731	k2
S2E6	United States	lowland	Ames-13740	K2	0.7272	K2	0.7272	k2
S2E6	United States	lowland	Ames-13740	K3	0.2728	K2	0.7272	k2
S1C6	United States	lowland	Ames-13722	K2	0.7202	K2	0.7202	k2
S1C6	United States	lowland	Ames-13722	K3	0.2798	K2	0.7202	k2
S1G6	United States	lowland	Ames-13753	K2	0.7195	K2	0.7195	k2
S1G6	United States	lowland	Ames-13753	K3	0.2805	K2	0.7195	k2
S1E1	Unknown	lowland	Bouchane-3	K2	0.6934	K2	0.6934	k2
S1E1	Unknown	lowland	Bouchane-3	K3	0.3066	K2	0.6934	k2
10185	Unknown	wild	C.hircinum BYU 1101	K2	0.6904	K2	0.6904	k2
10185	Unknown	wild	C.hircinum BYU 1101	K3	0.3096	K2	0.6904	k2
S1B6	United States	lowland	Ames-13735	K2	0.6783	K2	0.6783	k2
S1B6	United States	lowland	Ames-13735	K3	0.3217	K2	0.6783	k2
S1C8	United States	lowland	Ames-13730	K2	0.6594	K2	0.6594	k2
S1C8	United States	lowland	Ames-13730	K3	0.3406	K2	0.6594	k2
S1G9	United States	lowland	Ames-13727	K2	0.6584	K2	0.6584	k2
S1G9	United States	lowland	Ames-13727	K3	0.3416	K2	0.6584	k2
S3H4	Peru	lowland	CHEN-391	K2	0.6318	K2	0.6318	k2
S3H4	Peru	lowland	CHEN-391	K3	0.3682	K2	0.6318	k2
S2D4	United States	lowland	Ames-13750	K2	0.6258	K2	0.6258	k2
S2D4	United States	lowland	Ames-13750	K3	0.3742	K2	0.6258	k2
S3C1	Switzerland	lowland	CHEN-7	K2	0.6238	K2	0.6238	k2
S3C1	Switzerland	lowland	CHEN-7	K3	0.3762	K2	0.6238	k2
S1H7	United States	lowland	Ames-13749	K2	0.5814	K2	0.5814	k2
S1H7	United States	lowland	Ames-13749	K3	0.4186	K2	0.5814	k2
S2E4	United States	lowland	Ames-13755	K2	0.5554	K2	0.5554	k2
S2E4	United States	lowland	Ames-13755	K3	0.4446	K2	0.5554	k2
S1G10	United States	lowland	Ames-13760	K2	0.5517	K2	0.5517	k2
S1G10	United States	lowland	Ames-13760	K3	0.4483	K2	0.5517	k2
S2G4	United States	lowland	Ames-13754	K2	0.5328	K2	0.5328	k2
S2G4	United States	lowland	Ames-13754	K3	0.4672	K2	0.5328	k2
S1D11	United States	lowland	Ames-13726	K2	0.5164	K2	0.5164	k2
S1D11	United States	lowland	Ames-13726	K3	0.4836	K2	0.5164	k2
S2C3	United States	lowland	Ames-13728	K2	0.5154	K2	0.5154	k2
S2C3	United States	lowland	Ames-13728	K3	0.4846	K2	0.5154	k2
10183	Unknown	highland	Salcedo	K2	0	K3	1	k2
S1A10	Peru	highland	CHEN-404	K2	0	K3	1	k2
S1C10	Peru	highland	CHEN-382	K2	0	K3	1	k2
S1E11	Peru	highland	D-12175	K2	0	K3	1	k2
S1F10	Peru	highland	PI-510543	K2	0	K3	1	k2
S1F2	Bolivia	highland	D-12196	K2	0	K3	1	k2
S1H10	Peru	highland	D-12405	K2	0	K3	1	k2
S1H11	Peru	highland	D-12411	K2	0	K3	1	k2
S2A9	Peru	highland	D-12416	K2	0	K3	1	k2
S2B9	Peru	highland	D-11943	K2	0	K3	1	k2
S2C7	Peru	highland	D-11924	K2	0	K3	1	k2
S3A3	Peru	highland	CHEN-89	K2	0	K3	1	k2
S3A4	United States	highland	Ames-13725	K2	0	K3	1	k2
S3A8	Bolivia	highland	PI-614914	K2	0	K3	1	k2
S3B3	Peru	highland	D-12120	K2	0	K3	1	k2
S3B4	Unknown	highland	NSL-92331	K2	0	K3	1	k2
S3B5	Bolivia	highland	PI-478418	K2	0	K3	1	k2
S3B8	Peru	highland	D-11986	K2	0	K3	1	k2
S3C10	Peru	highland	CHEN-417	K2	0	K3	1	k2
S3C2	Peru	highland	D-12021	K2	0	K3	1	k2
S3C6	Unknown	highland	Kancolla	K2	0	K3	1	k2
S3C8	Peru	highland	Salcedo-Inia	K2	0	K3	1	k2
S3D11	Unknown	highland	Ratuqui	K2	0	K3	1	k2
S3D1	Peru	highland	D-12361	K2	0	K3	1	k2
S3D3	Peru	highland	CHEN-430	K2	0	K3	1	k2
S3D8	Bolivia	highland	CHEN-199	K2	0	K3	1	k2
S3D9	Peru	highland	D-12114	K2	0	K3	1	k2
S3E8	Peru	highland	D-11893	K2	0	K3	1	k2
S3E9	Peru	highland	D-12256	K2	0	K3	1	k2
S3F10	Peru	highland	D-10003	K2	0	K3	1	k2
S3F2	Peru	highland	CHEN-411	K2	0	K3	1	k2
S3F3	Peru	highland	CHEN-354	K2	0	K3	1	k2
S3F4	Peru	highland	CHEN-450	K2	0	K3	1	k2
S3F5	Peru	highland	CHEN-416	K2	0	K3	1	k2
S3F7	Unknown	highland	D-9992	K2	0	K3	1	k2
S3F8	Peru	highland	D-12251	K2	0	K3	1	k2
S3G3	Bolivia	highland	D-12181	K2	0	K3	1	k2
S3G9	Bolivia	highland	D-12329	K2	0	K3	1	k2
S3H3	Peru	highland	03-21-072RM	K2	0	K3	1	k2
S4A1	Bolivia	highland	CHEN-151	K2	0	K3	1	k2
S4A5	Peru	highland	PI-510537	K2	0	K3	1	k2
S4A9	Peru	highland	D-11953	K2	0	K3	1	k2
S4B1	Peru	highland	D-12027	K2	0	K3	1	k2
S4C10	Peru	highland	D-12135	K2	0	K3	1	k2
S4C1	Peru	highland	CHEN-383	K2	0	K3	1	k2
S4C5	Peru	highland	PI-510546	K2	0	K3	1	k2
S4D10	Unknown	highland	Kamiri	K2	0	K3	1	k2
S4D11	Peru	highland	D-12162	K2	0	K3	1	k2
S4D1	Australia	highland	PI-665272	K2	0	K3	1	k2
S4D6	Peru	highland	D-12362	K2	0	K3	1	k2
S4D7	Peru	highland	D-12222	K2	0	K3	1	k2
S4E11	Bolivia	highland	CHEN-144	K2	0	K3	1	k2
S4E1	Unknown	highland	D-9998	K2	0	K3	1	k2
S4E3	Peru	highland	CHEN-433	K2	0	K3	1	k2
S4E5	Peru	highland	PI-510551	K2	0	K3	1	k2
S4E7	Bolivia	highland	PI-478414	K2	0	K3	1	k2
S4E9	Peru	highland	D-12201	K2	0	K3	1	k2
S4F2	Peru	highland	D-12182	K2	0	K3	1	k2
S4F3	Peru	highland	D-11918	K2	0	K3	1	k2
S4F4	Peru	highland	CHEN-112	K2	0	K3	1	k2
S4G6	Peru	highland	CHEN-425	K2	0	K3	1	k2
S4G9	Peru	highland	CHEN-322	K2	0	K3	1	k2
S4H10	Peru	highland	CHEN-413	K2	0	K3	1	k2
S4H6	Bolivia	highland	CHEN-197	K2	0	K3	1	k2
10183	Unknown	highland	Salcedo	K3	1	K3	1	k2
S1A10	Peru	highland	CHEN-404	K3	1	K3	1	k2
S1C10	Peru	highland	CHEN-382	K3	1	K3	1	k2
S1E11	Peru	highland	D-12175	K3	1	K3	1	k2
S1F10	Peru	highland	PI-510543	K3	1	K3	1	k2
S1F2	Bolivia	highland	D-12196	K3	1	K3	1	k2
S1H10	Peru	highland	D-12405	K3	1	K3	1	k2
S1H11	Peru	highland	D-12411	K3	1	K3	1	k2
S2A9	Peru	highland	D-12416	K3	1	K3	1	k2
S2B9	Peru	highland	D-11943	K3	1	K3	1	k2
S2C7	Peru	highland	D-11924	K3	1	K3	1	k2
S3A3	Peru	highland	CHEN-89	K3	1	K3	1	k2
S3A4	United States	highland	Ames-13725	K3	1	K3	1	k2
S3A8	Bolivia	highland	PI-614914	K3	1	K3	1	k2
S3B3	Peru	highland	D-12120	K3	1	K3	1	k2
S3B4	Unknown	highland	NSL-92331	K3	1	K3	1	k2
S3B5	Bolivia	highland	PI-478418	K3	1	K3	1	k2
S3B8	Peru	highland	D-11986	K3	1	K3	1	k2
S3C10	Peru	highland	CHEN-417	K3	1	K3	1	k2
S3C2	Peru	highland	D-12021	K3	1	K3	1	k2
S3C6	Unknown	highland	Kancolla	K3	1	K3	1	k2
S3C8	Peru	highland	Salcedo-Inia	K3	1	K3	1	k2
S3D11	Unknown	highland	Ratuqui	K3	1	K3	1	k2
S3D1	Peru	highland	D-12361	K3	1	K3	1	k2
S3D3	Peru	highland	CHEN-430	K3	1	K3	1	k2
S3D8	Bolivia	highland	CHEN-199	K3	1	K3	1	k2
S3D9	Peru	highland	D-12114	K3	1	K3	1	k2
S3E8	Peru	highland	D-11893	K3	1	K3	1	k2
S3E9	Peru	highland	D-12256	K3	1	K3	1	k2
S3F10	Peru	highland	D-10003	K3	1	K3	1	k2
S3F2	Peru	highland	CHEN-411	K3	1	K3	1	k2
S3F3	Peru	highland	CHEN-354	K3	1	K3	1	k2
S3F4	Peru	highland	CHEN-450	K3	1	K3	1	k2
S3F5	Peru	highland	CHEN-416	K3	1	K3	1	k2
S3F7	Unknown	highland	D-9992	K3	1	K3	1	k2
S3F8	Peru	highland	D-12251	K3	1	K3	1	k2
S3G3	Bolivia	highland	D-12181	K3	1	K3	1	k2
S3G9	Bolivia	highland	D-12329	K3	1	K3	1	k2
S3H3	Peru	highland	03-21-072RM	K3	1	K3	1	k2
S4A1	Bolivia	highland	CHEN-151	K3	1	K3	1	k2
S4A5	Peru	highland	PI-510537	K3	1	K3	1	k2
S4A9	Peru	highland	D-11953	K3	1	K3	1	k2
S4B1	Peru	highland	D-12027	K3	1	K3	1	k2
S4C10	Peru	highland	D-12135	K3	1	K3	1	k2
S4C1	Peru	highland	CHEN-383	K3	1	K3	1	k2
S4C5	Peru	highland	PI-510546	K3	1	K3	1	k2
S4D10	Unknown	highland	Kamiri	K3	1	K3	1	k2
S4D11	Peru	highland	D-12162	K3	1	K3	1	k2
S4D1	Australia	highland	PI-665272	K3	1	K3	1	k2
S4D6	Peru	highland	D-12362	K3	1	K3	1	k2
S4D7	Peru	highland	D-12222	K3	1	K3	1	k2
S4E11	Bolivia	highland	CHEN-144	K3	1	K3	1	k2
S4E1	Unknown	highland	D-9998	K3	1	K3	1	k2
S4E3	Peru	highland	CHEN-433	K3	1	K3	1	k2
S4E5	Peru	highland	PI-510551	K3	1	K3	1	k2
S4E7	Bolivia	highland	PI-478414	K3	1	K3	1	k2
S4E9	Peru	highland	D-12201	K3	1	K3	1	k2
S4F2	Peru	highland	D-12182	K3	1	K3	1	k2
S4F3	Peru	highland	D-11918	K3	1	K3	1	k2
S4F4	Peru	highland	CHEN-112	K3	1	K3	1	k2
S4G6	Peru	highland	CHEN-425	K3	1	K3	1	k2
S4G9	Peru	highland	CHEN-322	K3	1	K3	1	k2
S4H10	Peru	highland	CHEN-413	K3	1	K3	1	k2
S4H6	Bolivia	highland	CHEN-197	K3	1	K3	1	k2
S1A2	Peru	highland	CHEN-349	K2	0.0001	K3	0.9999	k2
S3B6	Unknown	highland	Bouchane-2	K2	0.0001	K3	0.9999	k2
S3H10	Unknown	highland	CICA-127	K2	0.0001	K3	0.9999	k2
S1A2	Peru	highland	CHEN-349	K3	0.9999	K3	0.9999	k2
S3B6	Unknown	highland	Bouchane-2	K3	0.9999	K3	0.9999	k2
S3H10	Unknown	highland	CICA-127	K3	0.9999	K3	0.9999	k2
S1H4	Peru	highland	D-12220	K2	0.0002	K3	0.9998	k2
S3C5	Peru	highland	D-12350	K2	0.0002	K3	0.9998	k2
S3E3	Peru	highland	D-12309	K2	0.0002	K3	0.9998	k2
S1H4	Peru	highland	D-12220	K3	0.9998	K3	0.9998	k2
S3C5	Peru	highland	D-12350	K3	0.9998	K3	0.9998	k2
S3E3	Peru	highland	D-12309	K3	0.9998	K3	0.9998	k2
S3D6	Chile	highland	BO-60	K2	0.0003	K3	0.9997	k2
S4G2	Bolivia	highland	D-12413	K2	0.0003	K3	0.9997	k2
S3D6	Chile	highland	BO-60	K3	0.9997	K3	0.9997	k2
S4G2	Bolivia	highland	D-12413	K3	0.9997	K3	0.9997	k2
S1G11	Peru	highland	D-12184	K2	0.0004	K3	0.9996	k2
S3D7	Bolivia	highland	D-12424	K2	0.0004	K3	0.9996	k2
S3F6	Peru	highland	D-12353	K2	0.0004	K3	0.9996	k2
S4E4	Peru	highland	CHEN-401	K2	0.0004	K3	0.9996	k2
S1G11	Peru	highland	D-12184	K3	0.9996	K3	0.9996	k2
S3D7	Bolivia	highland	D-12424	K3	0.9996	K3	0.9996	k2
S3F6	Peru	highland	D-12353	K3	0.9996	K3	0.9996	k2
S4E4	Peru	highland	CHEN-401	K3	0.9996	K3	0.9996	k2
S3H8	Peru	highland	CHEN-427	K2	0.0005	K3	0.9995	k2
S3H8	Peru	highland	CHEN-427	K3	0.9995	K3	0.9995	k2
S4G1	Peru	highland	CHEN-339	K2	0.0007	K3	0.9993	k2
S4G1	Peru	highland	CHEN-339	K3	0.9993	K3	0.9993	k2
S4D3	Peru	highland	D-12389	K2	0.0009	K3	0.9991	k2
S4D3	Peru	highland	D-12389	K3	0.9991	K3	0.9991	k2
S4A4	Peru	highland	D-12122	K2	0.001	K3	0.999	k2
S4A4	Peru	highland	D-12122	K3	0.999	K3	0.999	k2
S1B4	Bolivia	highland	CHEN-160	K2	0.0011	K3	0.9989	k2
S1B4	Bolivia	highland	CHEN-160	K3	0.9989	K3	0.9989	k2
S2E7	Peru	highland	CHEN-342	K2	0.0012	K3	0.9988	k2
S2E7	Peru	highland	CHEN-342	K3	0.9988	K3	0.9988	k2
S3C3	Bolivia	highland	CHEN-155	K2	0.0013	K3	0.9987	k2
S4E2	Peru	highland	D-12179	K2	0.0013	K3	0.9987	k2
S3C3	Bolivia	highland	CHEN-155	K3	0.9987	K3	0.9987	k2
S4E2	Peru	highland	D-12179	K3	0.9987	K3	0.9987	k2
S1A3	Bolivia	highland	D-12420	K2	0.0016	K3	0.9984	k2
S1E8	Bolivia	highland	CHEN-126	K2	0.0016	K3	0.9984	k2
S1A3	Bolivia	highland	D-12420	K3	0.9984	K3	0.9984	k2
S1E8	Bolivia	highland	CHEN-126	K3	0.9984	K3	0.9984	k2
S3B9	Peru	highland	CHEN-299	K2	0.0017	K3	0.9983	k2
S3B9	Peru	highland	CHEN-299	K3	0.9983	K3	0.9983	k2
10181	Peru	highland	CICA	K2	0.0018	K3	0.9982	k2
S2B10	Bolivia	highland	CHEN-220	K2	0.0018	K3	0.9982	k2
10181	Peru	highland	CICA	K3	0.9982	K3	0.9982	k2
S2B10	Bolivia	highland	CHEN-220	K3	0.9982	K3	0.9982	k2
S1C4	Peru	highland	D-12211	K2	0.0019	K3	0.9981	k2
S1C4	Peru	highland	D-12211	K3	0.9981	K3	0.9981	k2
S3A5	Unknown	highland	D-12279	K2	0.002	K3	0.998	k2
S3A5	Unknown	highland	D-12279	K3	0.998	K3	0.998	k2
S2A5	Peru	highland	CHEN-256	K2	0.0022	K3	0.9978	k2
S2A5	Peru	highland	CHEN-256	K3	0.9978	K3	0.9978	k2
S4H8	Peru	highland	D-12320	K2	0.0027	K3	0.9973	k2
S4H8	Peru	highland	D-12320	K3	0.9973	K3	0.9973	k2
S1C2	Peru	highland	D-12243	K2	0.0031	K3	0.9969	k2
S1C2	Peru	highland	D-12243	K3	0.9969	K3	0.9969	k2
S3A10	Peru	highland	D-12074	K2	0.0034	K3	0.9966	k2
S3A10	Peru	highland	D-12074	K3	0.9966	K3	0.9966	k2
S4G7	Bolivia	highland	CHEN-161	K2	0.0037	K3	0.9963	k2
S4G7	Bolivia	highland	CHEN-161	K3	0.9963	K3	0.9963	k2
S4H2	Peru	highland	D-11927	K2	0.0039	K3	0.9961	k2
S4H2	Peru	highland	D-11927	K3	0.9961	K3	0.9961	k2
S1G4	Peru	highland	D-12345	K2	0.004	K3	0.996	k2
S1G4	Peru	highland	D-12345	K3	0.996	K3	0.996	k2
S4G10	Peru	highland	CHEN-384	K2	0.0042	K3	0.9958	k2
S4G10	Peru	highland	CHEN-384	K3	0.9958	K3	0.9958	k2
S2F7	Peru	highland	PI-596498	K2	0.0045	K3	0.9955	k2
S2H9	Peru	highland	CHEN-361	K2	0.0045	K3	0.9955	k2
S2F7	Peru	highland	PI-596498	K3	0.9955	K3	0.9955	k2
S2H9	Peru	highland	CHEN-361	K3	0.9955	K3	0.9955	k2
10176	Unknown	highland	Pasankalla	K2	0.0046	K3	0.9954	k2
S2G8	Bolivia	highland	D-12166	K2	0.0046	K3	0.9954	k2
10176	Unknown	highland	Pasankalla	K3	0.9954	K3	0.9954	k2
S2G8	Bolivia	highland	D-12166	K3	0.9954	K3	0.9954	k2
S2G3	Bolivia	highland	CHEN-222	K2	0.0049	K3	0.9951	k2
S2G3	Bolivia	highland	CHEN-222	K3	0.9951	K3	0.9951	k2
S2E9	Peru	highland	CHEN-437	K2	0.0054	K3	0.9946	k2
S2E9	Peru	highland	CHEN-437	K3	0.9946	K3	0.9946	k2
S4E6	Peru	highland	CHEN-330	K2	0.0055	K3	0.9945	k2
S4E6	Peru	highland	CHEN-330	K3	0.9945	K3	0.9945	k2
S1C3	Peru	highland	D-12205	K2	0.0057	K3	0.9943	k2
S1C3	Peru	highland	D-12205	K3	0.9943	K3	0.9943	k2
S4A2	Peru	highland	CHEN-358	K2	0.006	K3	0.994	k2
S4A2	Peru	highland	CHEN-358	K3	0.994	K3	0.994	k2
S2C5	Peru	highland	D-12387	K2	0.0065	K3	0.9935	k2
S2C5	Peru	highland	D-12387	K3	0.9935	K3	0.9935	k2
S3G1	Bolivia	highland	D-12431	K2	0.0068	K3	0.9932	k2
S3G1	Bolivia	highland	D-12431	K3	0.9932	K3	0.9932	k2
S2E3	Peru	highland	D-12119	K2	0.0073	K3	0.9927	k2
S2E3	Peru	highland	D-12119	K3	0.9927	K3	0.9927	k2
S1C7	Peru	highland	D-12167	K2	0.0081	K3	0.9919	k2
S1C7	Peru	highland	D-12167	K3	0.9919	K3	0.9919	k2
S2D8	Peru	highland	PI-510549	K2	0.0085	K3	0.9915	k2
S2D8	Peru	highland	PI-510549	K3	0.9915	K3	0.9915	k2
S2D10	Bolivia	highland	D-12409	K2	0.0087	K3	0.9913	k2
S2D10	Bolivia	highland	D-12409	K3	0.9913	K3	0.9913	k2
S2B5	Peru	highland	CHEN-205	K2	0.0089	K3	0.9911	k2
S2B5	Peru	highland	CHEN-205	K3	0.9911	K3	0.9911	k2
S3D10	Peru	highland	CHEN-397	K2	0.009	K3	0.991	k2
S3D10	Peru	highland	CHEN-397	K3	0.991	K3	0.991	k2
S2H6	Peru	highland	D-12289	K2	0.0093	K3	0.9907	k2
S4G3	Peru	highland	CHEN-110	K2	0.0093	K3	0.9907	k2
S2H6	Peru	highland	D-12289	K3	0.9907	K3	0.9907	k2
S4G3	Peru	highland	CHEN-110	K3	0.9907	K3	0.9907	k2
S2C2	Peru	highland	CHEN-65	K2	0.0095	K3	0.9905	k2
S2C2	Peru	highland	CHEN-65	K3	0.9905	K3	0.9905	k2
S2C9	Bolivia	highland	CHEN-71	K2	0.0098	K3	0.9902	k2
S2C9	Bolivia	highland	CHEN-71	K3	0.9902	K3	0.9902	k2
S4G5	Bolivia	highland	PI-614934	K2	0.01	K3	0.99	k2
S4G5	Bolivia	highland	PI-614934	K3	0.99	K3	0.99	k2
S4B2	Peru	highland	CHEN-212	K2	0.0102	K3	0.9898	k2
S4B2	Peru	highland	CHEN-212	K3	0.9898	K3	0.9898	k2
S3C7	Peru	highland	D-12268	K2	0.0104	K3	0.9896	k2
S3C7	Peru	highland	D-12268	K3	0.9896	K3	0.9896	k2
S4H1	Unknown	highland	D-9977	K2	0.0105	K3	0.9895	k2
S4H1	Unknown	highland	D-9977	K3	0.9895	K3	0.9895	k2
S1F4	Peru	highland	CHEN-424	K2	0.0106	K3	0.9894	k2
S1F4	Peru	highland	CHEN-424	K3	0.9894	K3	0.9894	k2
S4F9	Bolivia	highland	PI-614920	K2	0.0115	K3	0.9885	k2
S4F9	Bolivia	highland	PI-614920	K3	0.9885	K3	0.9885	k2
S1H3	Peru	highland	CHEN-420	K2	0.0116	K3	0.9884	k2
S1H3	Peru	highland	CHEN-420	K3	0.9884	K3	0.9884	k2
S4H4	Peru	highland	D-12020	K2	0.0121	K3	0.9879	k2
S4H4	Peru	highland	D-12020	K3	0.9879	K3	0.9879	k2
S1F8	Bolivia	highland	D-12037	K2	0.0123	K3	0.9877	k2
S1F8	Bolivia	highland	D-12037	K3	0.9877	K3	0.9877	k2
S4C3	Peru	highland	CHEN-412	K2	0.0126	K3	0.9874	k2
S4C3	Peru	highland	CHEN-412	K3	0.9874	K3	0.9874	k2
S2F10	Peru	highland	D-12354	K2	0.0134	K3	0.9866	k2
S2F10	Peru	highland	D-12354	K3	0.9866	K3	0.9866	k2
S3A9	Peru	highland	D-12060	K2	0.0136	K3	0.9864	k2
S3A9	Peru	highland	D-12060	K3	0.9864	K3	0.9864	k2
S1D2	Peru	highland	CHEN-465	K2	0.0139	K3	0.9861	k2
S4C2	Peru	highland	CHEN-429	K2	0.0139	K3	0.9861	k2
S1D2	Peru	highland	CHEN-465	K3	0.9861	K3	0.9861	k2
S4C2	Peru	highland	CHEN-429	K3	0.9861	K3	0.9861	k2
S2B3	Peru	highland	D-12079	K2	0.014	K3	0.986	k2
S2B3	Peru	highland	D-12079	K3	0.986	K3	0.986	k2
S4G4	Peru	highland	CHEN-350	K2	0.0142	K3	0.9858	k2
S4G4	Peru	highland	CHEN-350	K3	0.9858	K3	0.9858	k2
S2C4	Bolivia	highland	CHEN-159	K2	0.0151	K3	0.9849	k2
S4B10	Bolivia	highland	D-12346	K2	0.0151	K3	0.9849	k2
S2C4	Bolivia	highland	CHEN-159	K3	0.9849	K3	0.9849	k2
S4B10	Bolivia	highland	D-12346	K3	0.9849	K3	0.9849	k2
S4D2	Peru	highland	CHEN-390	K2	0.0155	K3	0.9845	k2
S4D2	Peru	highland	CHEN-390	K3	0.9845	K3	0.9845	k2
10178	Unknown	highland	LP.Q2 quinoa (kurmi)	K2	0.0169	K3	0.9831	k2
10178	Unknown	highland	LP.Q2 quinoa (kurmi)	K3	0.9831	K3	0.9831	k2
S1H8	Bolivia	highland	D-12208	K2	0.0176	K3	0.9824	k2
S1H8	Bolivia	highland	D-12208	K3	0.9824	K3	0.9824	k2
S3H7	Unknown	highland	ICBA-Q3	K2	0.0177	K3	0.9823	k2
S3H7	Unknown	highland	ICBA-Q3	K3	0.9823	K3	0.9823	k2
S3C4	Peru	highland	D-12393	K2	0.0189	K3	0.9811	k2
S3C4	Peru	highland	D-12393	K3	0.9811	K3	0.9811	k2
S4D4	Peru	highland	CHEN-333	K2	0.0197	K3	0.9803	k2
S4D4	Peru	highland	CHEN-333	K3	0.9803	K3	0.9803	k2
S3G8	Peru	highland	CHEN-182	K2	0.0206	K3	0.9794	k2
S3G8	Peru	highland	CHEN-182	K3	0.9794	K3	0.9794	k2
S4F7	Bolivia	highland	D-12395	K2	0.0213	K3	0.9787	k2
S4F7	Bolivia	highland	D-12395	K3	0.9787	K3	0.9787	k2
S4F6	Unknown	highland	D-9985	K2	0.0217	K3	0.9783	k2
S4F6	Unknown	highland	D-9985	K3	0.9783	K3	0.9783	k2
S4F1	Bolivia	highland	PI-614919	K2	0.0231	K3	0.9769	k2
S4F1	Bolivia	highland	PI-614919	K3	0.9769	K3	0.9769	k2
S4A3	Peru	highland	CHEN-376	K2	0.0234	K3	0.9766	k2
S4A3	Peru	highland	CHEN-376	K3	0.9766	K3	0.9766	k2
S2B8	Peru	highland	CHEN-91	K2	0.0238	K3	0.9762	k2
S2B8	Peru	highland	CHEN-91	K3	0.9762	K3	0.9762	k2
S3H9	Bolivia	highland	CHEN-141	K2	0.024	K3	0.976	k2
S3H9	Bolivia	highland	CHEN-141	K3	0.976	K3	0.976	k2
S4A10	Peru	highland	D-11935	K2	0.0241	K3	0.9759	k2
S4A10	Peru	highland	D-11935	K3	0.9759	K3	0.9759	k2
S4B5	Peru	highland	CHEN-400	K2	0.0249	K3	0.9751	k2
S4B5	Peru	highland	CHEN-400	K3	0.9751	K3	0.9751	k2
S3E7	Peru	highland	CHEN-297	K2	0.025	K3	0.975	k2
S3E7	Peru	highland	CHEN-297	K3	0.975	K3	0.975	k2
S4C6	Peru	highland	CHEN-69	K2	0.0255	K3	0.9745	k2
S4C6	Peru	highland	CHEN-69	K3	0.9745	K3	0.9745	k2
S2B4	Peru	highland	CHEN-423	K2	0.0261	K3	0.9739	k2
S2B6	Bolivia	highland	PI-614929	K2	0.0261	K3	0.9739	k2
S2B4	Peru	highland	CHEN-423	K3	0.9739	K3	0.9739	k2
S2B6	Bolivia	highland	PI-614929	K3	0.9739	K3	0.9739	k2
S1F11	Unknown	highland	D-9973	K2	0.0275	K3	0.9725	k2
S1F11	Unknown	highland	D-9973	K3	0.9725	K3	0.9725	k2
S4H11	Peru	highland	D-12229	K2	0.028	K3	0.972	k2
S4H11	Peru	highland	D-12229	K3	0.972	K3	0.972	k2
S2G9	Bolivia	highland	CHEN-219	K2	0.0288	K3	0.9712	k2
S2G9	Bolivia	highland	CHEN-219	K3	0.9712	K3	0.9712	k2
S4H5	Peru	highland	D-12081	K2	0.0309	K3	0.9691	k2
S4H5	Peru	highland	D-12081	K3	0.9691	K3	0.9691	k2
S2G11	Peru	highland	CHEN-225	K2	0.0311	K3	0.9689	k2
S2G11	Peru	highland	CHEN-225	K3	0.9689	K3	0.9689	k2
S3E1	Peru	highland	CHEN-406	K2	0.0314	K3	0.9686	k2
S3E1	Peru	highland	CHEN-406	K3	0.9686	K3	0.9686	k2
S1F5	Peru	highland	CHEN-470	K2	0.0319	K3	0.9681	k2
S2A10	Peru	highland	CHEN-224	K2	0.0319	K3	0.9681	k2
S1F5	Peru	highland	CHEN-470	K3	0.9681	K3	0.9681	k2
S2A10	Peru	highland	CHEN-224	K3	0.9681	K3	0.9681	k2
S4H3	Peru	highland	D-12082	K2	0.0321	K3	0.9679	k2
S4H3	Peru	highland	D-12082	K3	0.9679	K3	0.9679	k2
S2H8	Peru	highland	D-12176	K2	0.0338	K3	0.9662	k2
S2H8	Peru	highland	D-12176	K3	0.9662	K3	0.9662	k2
S2A1	Peru	highland	D-12183	K2	0.0344	K3	0.9656	k2
S2A1	Peru	highland	D-12183	K3	0.9656	K3	0.9656	k2
S4C4	Unknown	highland	D-9994	K2	0.0345	K3	0.9655	k2
S4C4	Unknown	highland	D-9994	K3	0.9655	K3	0.9655	k2
S3E11	Peru	highland	D-12363	K2	0.0349	K3	0.9651	k2
S3E11	Peru	highland	D-12363	K3	0.9651	K3	0.9651	k2
S2B7	Peru	highland	D-10005	K2	0.0356	K3	0.9644	k2
S2B7	Peru	highland	D-10005	K3	0.9644	K3	0.9644	k2
S1E2	Peru	highland	D-11980	K2	0.0381	K3	0.9619	k2
S1E2	Peru	highland	D-11980	K3	0.9619	K3	0.9619	k2
S4B4	Bolivia	highland	CHEN-142	K2	0.0385	K3	0.9615	k2
S4B4	Bolivia	highland	CHEN-142	K3	0.9615	K3	0.9615	k2
S2H4	Peru	highland	CHEN-319	K2	0.0402	K3	0.9598	k2
S2H4	Peru	highland	CHEN-319	K3	0.9598	K3	0.9598	k2
S2H2	Peru	highland	CHEN-415	K2	0.0411	K3	0.9589	k2
S2H2	Peru	highland	CHEN-415	K3	0.9589	K3	0.9589	k2
S1G2	Peru	highland	CHEN-298	K2	0.0422	K3	0.9578	k2
S1G2	Peru	highland	CHEN-298	K3	0.9578	K3	0.9578	k2
S4A8	Peru	highland	CHEN-109	K2	0.0466	K3	0.9534	k2
S4A8	Peru	highland	CHEN-109	K3	0.9534	K3	0.9534	k2
S1F3	Peru	highland	D-12036	K2	0.0476	K3	0.9524	k2
S1F3	Peru	highland	D-12036	K3	0.9524	K3	0.9524	k2
S2G5	Bolivia	highland	CHEN-226	K2	0.0508	K3	0.9492	k2
S2G5	Bolivia	highland	CHEN-226	K3	0.9492	K3	0.9492	k2
S2F2	Peru	highland	CHEN-218	K2	0.0525	K3	0.9475	k2
S2F2	Peru	highland	CHEN-218	K3	0.9475	K3	0.9475	k2
S1D7	Peru	highland	D-12357	K2	0.0532	K3	0.9468	k2
S1D7	Peru	highland	D-12357	K3	0.9468	K3	0.9468	k2
S3D4	Chile	highland	BO-52	K2	0.0549	K3	0.9451	k2
S3D4	Chile	highland	BO-52	K3	0.9451	K3	0.9451	k2
S2A8	Bolivia	highland	CHEN-162	K2	0.0562	K3	0.9438	k2
S2A8	Bolivia	highland	CHEN-162	K3	0.9438	K3	0.9438	k2
S1E5	Peru	highland	CHEN-291	K2	0.0615	K3	0.9385	k2
S1E5	Peru	highland	CHEN-291	K3	0.9385	K3	0.9385	k2
S2D11	Peru	highland	D-12397	K2	0.0622	K3	0.9378	k2
S2D11	Peru	highland	D-12397	K3	0.9378	K3	0.9378	k2
S1D8	Peru	highland	D-12087	K2	0.0627	K3	0.9373	k2
S1D8	Peru	highland	D-12087	K3	0.9373	K3	0.9373	k2
S1A7	Peru	highland	CHEN-389	K2	0.064	K3	0.936	k2
S1A7	Peru	highland	CHEN-389	K3	0.936	K3	0.936	k2
S1B5	Peru	highland	CHEN-90	K2	0.0649	K3	0.9351	k2
S1B5	Peru	highland	CHEN-90	K3	0.9351	K3	0.9351	k2
S3E10	Peru	highland	PI-510532	K2	0.0689	K3	0.9311	k2
S3E10	Peru	highland	PI-510532	K3	0.9311	K3	0.9311	k2
S4C9	Bolivia	highland	PI-478408	K2	0.0696	K3	0.9304	k2
S4C9	Bolivia	highland	PI-478408	K3	0.9304	K3	0.9304	k2
S4E8	Bolivia	highland	PI-665277	K2	0.0716	K3	0.9284	k2
S4E8	Bolivia	highland	PI-665277	K3	0.9284	K3	0.9284	k2
S2E10	Peru	highland	D-11965	K2	0.0732	K3	0.9268	k2
S2E10	Peru	highland	D-11965	K3	0.9268	K3	0.9268	k2
S4C7	Bolivia	highland	D-12253	K2	0.0745	K3	0.9255	k2
S4C7	Bolivia	highland	D-12253	K3	0.9255	K3	0.9255	k2
S1H2	Bolivia	highland	PI-665276	K2	0.0754	K3	0.9246	k2
S1H2	Bolivia	highland	PI-665276	K3	0.9246	K3	0.9246	k2
S3G5	Peru	highland	CHEN-302	K2	0.0788	K3	0.9212	k2
S3G5	Peru	highland	CHEN-302	K3	0.9212	K3	0.9212	k2
S4B9	Bolivia	highland	CHEN-174	K2	0.0806	K3	0.9194	k2
S4B9	Bolivia	highland	CHEN-174	K3	0.9194	K3	0.9194	k2
S2H7	NA	highland	PI-614884	K2	0.0872	K3	0.9128	k2
S2H7	NA	highland	PI-614884	K3	0.9128	K3	0.9128	k2
S2D7	Peru	highland	PI-510533	K2	0.0889	K3	0.9111	k2
S2D7	Peru	highland	PI-510533	K3	0.9111	K3	0.9111	k2
S4D5	Bolivia	highland	PI-614915	K2	0.0907	K3	0.9093	k2
S4D5	Bolivia	highland	PI-614915	K3	0.9093	K3	0.9093	k2
S2F8	Bolivia	highland	CHEN-128	K2	0.0913	K3	0.9087	k2
S2F8	Bolivia	highland	CHEN-128	K3	0.9087	K3	0.9087	k2
S4F5	Argentina	highland	PI-587173	K2	0.1145	K3	0.8855	k2
S4F5	Argentina	highland	PI-587173	K3	0.8855	K3	0.8855	k2
S4F10	Argentina	highland	PI-614881	K2	0.1271	K3	0.8729	k2
S4F10	Argentina	highland	PI-614881	K3	0.8729	K3	0.8729	k2
10177	Unknown	wild	C.hircinum BYU 566	K2	0.3648	K3	0.6352	k2
10177	Unknown	wild	C.hircinum BYU 566	K3	0.6352	K3	0.6352	k2
S4B3	Unknown	lowland	G-205	K2	0.4223	K3	0.5777	k2
S4B3	Unknown	lowland	G-205	K3	0.5777	K3	0.5777	k2
S2D9	United States	lowland	Ames-13733	K2	0.4537	K3	0.5463	k2
S2D9	United States	lowland	Ames-13733	K3	0.5463	K3	0.5463	k2
S3B1	Peru	lowland	D-12123	K2	0.4623	K3	0.5377	k2
S3B1	Peru	lowland	D-12123	K3	0.5377	K3	0.5377	k2
10184	Unknown	lowland	G-200-Q3 quinoa	K2	0.4628	K3	0.5372	k2
10184	Unknown	lowland	G-200-Q3 quinoa	K3	0.5372	K3	0.5372	k2
S2H5	United States	lowland	Ames-13748	K2	0.4629	K3	0.5371	k2
S2H5	United States	lowland	Ames-13748	K3	0.5371	K3	0.5371	k2
S3E5	Chile	lowland	PI-634918	K2	0.4724	K3	0.5276	k2
S3E5	Chile	lowland	PI-634918	K3	0.5276	K3	0.5276	k2
10179	Unknown	wild	C. berliandieri boscianum	K2	0.9999	K2	0.9999	k8
10180	Unknown	wild	C. berliandieri macro	K2	0.9999	K2	0.9999	k8
10186	Unknown	wild	C. berliandieri zschacker	K2	0.9999	K2	0.9999	k8
10187	Unknown	wild	C. berliandieri nuttaliae	K2	0.9999	K2	0.9999	k8
10192	Unknown	wild	C. berliandieri sinuatum	K2	0.9999	K2	0.9999	k8
10179	Unknown	wild	C. berliandieri boscianum	K3	0	K2	0.9999	k8
10180	Unknown	wild	C. berliandieri macro	K3	0	K2	0.9999	k8
10186	Unknown	wild	C. berliandieri zschacker	K3	0	K2	0.9999	k8
10187	Unknown	wild	C. berliandieri nuttaliae	K3	0	K2	0.9999	k8
10192	Unknown	wild	C. berliandieri sinuatum	K3	0	K2	0.9999	k8
10179	Unknown	wild	C. berliandieri boscianum	K4	0	K2	0.9999	k8
10180	Unknown	wild	C. berliandieri macro	K4	0	K2	0.9999	k8
10186	Unknown	wild	C. berliandieri zschacker	K4	0	K2	0.9999	k8
10187	Unknown	wild	C. berliandieri nuttaliae	K4	0	K2	0.9999	k8
10192	Unknown	wild	C. berliandieri sinuatum	K4	0	K2	0.9999	k8
10179	Unknown	wild	C. berliandieri boscianum	K5	0	K2	0.9999	k8
10180	Unknown	wild	C. berliandieri macro	K5	0	K2	0.9999	k8
10186	Unknown	wild	C. berliandieri zschacker	K5	0	K2	0.9999	k8
10187	Unknown	wild	C. berliandieri nuttaliae	K5	0	K2	0.9999	k8
10192	Unknown	wild	C. berliandieri sinuatum	K5	0	K2	0.9999	k8
10179	Unknown	wild	C. berliandieri boscianum	K6	0	K2	0.9999	k8
10180	Unknown	wild	C. berliandieri macro	K6	0	K2	0.9999	k8
10186	Unknown	wild	C. berliandieri zschacker	K6	0	K2	0.9999	k8
10187	Unknown	wild	C. berliandieri nuttaliae	K6	0	K2	0.9999	k8
10192	Unknown	wild	C. berliandieri sinuatum	K6	0	K2	0.9999	k8
10179	Unknown	wild	C. berliandieri boscianum	K7	0	K2	0.9999	k8
10180	Unknown	wild	C. berliandieri macro	K7	0	K2	0.9999	k8
10186	Unknown	wild	C. berliandieri zschacker	K7	0	K2	0.9999	k8
10187	Unknown	wild	C. berliandieri nuttaliae	K7	0	K2	0.9999	k8
10192	Unknown	wild	C. berliandieri sinuatum	K7	0	K2	0.9999	k8
10179	Unknown	wild	C. berliandieri boscianum	K8	0	K2	0.9999	k8
10180	Unknown	wild	C. berliandieri macro	K8	0	K2	0.9999	k8
10186	Unknown	wild	C. berliandieri zschacker	K8	0	K2	0.9999	k8
10187	Unknown	wild	C. berliandieri nuttaliae	K8	0	K2	0.9999	k8
10192	Unknown	wild	C. berliandieri sinuatum	K8	0	K2	0.9999	k8
10179	Unknown	wild	C. berliandieri boscianum	K9	0	K2	0.9999	k8
10180	Unknown	wild	C. berliandieri macro	K9	0	K2	0.9999	k8
10186	Unknown	wild	C. berliandieri zschacker	K9	0	K2	0.9999	k8
10187	Unknown	wild	C. berliandieri nuttaliae	K9	0	K2	0.9999	k8
10192	Unknown	wild	C. berliandieri sinuatum	K9	0	K2	0.9999	k8
10185	Unknown	wild	C.hircinum BYU 1101	K2	0.7532	K2	0.7532	k8
10185	Unknown	wild	C.hircinum BYU 1101	K3	0	K2	0.7532	k8
10185	Unknown	wild	C.hircinum BYU 1101	K4	0.0442	K2	0.7532	k8
10185	Unknown	wild	C.hircinum BYU 1101	K5	0.1071	K2	0.7532	k8
10185	Unknown	wild	C.hircinum BYU 1101	K6	0.0807	K2	0.7532	k8
10185	Unknown	wild	C.hircinum BYU 1101	K7	0.0143	K2	0.7532	k8
10185	Unknown	wild	C.hircinum BYU 1101	K8	0.0005	K2	0.7532	k8
10185	Unknown	wild	C.hircinum BYU 1101	K9	0	K2	0.7532	k8
S1A2	Peru	highland	CHEN-349	K2	0	K3	0.9999	k8
S1C10	Peru	highland	CHEN-382	K2	0	K3	0.9999	k8
S1H10	Peru	highland	D-12405	K2	0	K3	0.9999	k8
S1H11	Peru	highland	D-12411	K2	0	K3	0.9999	k8
S3E9	Peru	highland	D-12256	K2	0	K3	0.9999	k8
S3G3	Bolivia	highland	D-12181	K2	0	K3	0.9999	k8
S4D11	Peru	highland	D-12162	K2	0	K3	0.9999	k8
S4D6	Peru	highland	D-12362	K2	0	K3	0.9999	k8
S4D7	Peru	highland	D-12222	K2	0	K3	0.9999	k8
S4H10	Peru	highland	CHEN-413	K2	0	K3	0.9999	k8
S1A2	Peru	highland	CHEN-349	K3	0.9999	K3	0.9999	k8
S1C10	Peru	highland	CHEN-382	K3	0.9999	K3	0.9999	k8
S1H10	Peru	highland	D-12405	K3	0.9999	K3	0.9999	k8
S1H11	Peru	highland	D-12411	K3	0.9999	K3	0.9999	k8
S3E9	Peru	highland	D-12256	K3	0.9999	K3	0.9999	k8
S3G3	Bolivia	highland	D-12181	K3	0.9999	K3	0.9999	k8
S4D11	Peru	highland	D-12162	K3	0.9999	K3	0.9999	k8
S4D6	Peru	highland	D-12362	K3	0.9999	K3	0.9999	k8
S4D7	Peru	highland	D-12222	K3	0.9999	K3	0.9999	k8
S4H10	Peru	highland	CHEN-413	K3	0.9999	K3	0.9999	k8
S1A2	Peru	highland	CHEN-349	K4	0	K3	0.9999	k8
S1C10	Peru	highland	CHEN-382	K4	0	K3	0.9999	k8
S1H10	Peru	highland	D-12405	K4	0	K3	0.9999	k8
S1H11	Peru	highland	D-12411	K4	0	K3	0.9999	k8
S3E9	Peru	highland	D-12256	K4	0	K3	0.9999	k8
S3G3	Bolivia	highland	D-12181	K4	0	K3	0.9999	k8
S4D11	Peru	highland	D-12162	K4	0	K3	0.9999	k8
S4D6	Peru	highland	D-12362	K4	0	K3	0.9999	k8
S4D7	Peru	highland	D-12222	K4	0	K3	0.9999	k8
S4H10	Peru	highland	CHEN-413	K4	0	K3	0.9999	k8
S1A2	Peru	highland	CHEN-349	K5	0	K3	0.9999	k8
S1C10	Peru	highland	CHEN-382	K5	0	K3	0.9999	k8
S1H10	Peru	highland	D-12405	K5	0	K3	0.9999	k8
S1H11	Peru	highland	D-12411	K5	0	K3	0.9999	k8
S3E9	Peru	highland	D-12256	K5	0	K3	0.9999	k8
S3G3	Bolivia	highland	D-12181	K5	0	K3	0.9999	k8
S4D11	Peru	highland	D-12162	K5	0	K3	0.9999	k8
S4D6	Peru	highland	D-12362	K5	0	K3	0.9999	k8
S4D7	Peru	highland	D-12222	K5	0	K3	0.9999	k8
S4H10	Peru	highland	CHEN-413	K5	0	K3	0.9999	k8
S1A2	Peru	highland	CHEN-349	K6	0	K3	0.9999	k8
S1C10	Peru	highland	CHEN-382	K6	0	K3	0.9999	k8
S1H10	Peru	highland	D-12405	K6	0	K3	0.9999	k8
S1H11	Peru	highland	D-12411	K6	0	K3	0.9999	k8
S3E9	Peru	highland	D-12256	K6	0	K3	0.9999	k8
S3G3	Bolivia	highland	D-12181	K6	0	K3	0.9999	k8
S4D11	Peru	highland	D-12162	K6	0	K3	0.9999	k8
S4D6	Peru	highland	D-12362	K6	0	K3	0.9999	k8
S4D7	Peru	highland	D-12222	K6	0	K3	0.9999	k8
S4H10	Peru	highland	CHEN-413	K6	0	K3	0.9999	k8
S1A2	Peru	highland	CHEN-349	K7	0	K3	0.9999	k8
S1C10	Peru	highland	CHEN-382	K7	0	K3	0.9999	k8
S1H10	Peru	highland	D-12405	K7	0	K3	0.9999	k8
S1H11	Peru	highland	D-12411	K7	0	K3	0.9999	k8
S3E9	Peru	highland	D-12256	K7	0	K3	0.9999	k8
S3G3	Bolivia	highland	D-12181	K7	0	K3	0.9999	k8
S4D11	Peru	highland	D-12162	K7	0	K3	0.9999	k8
S4D6	Peru	highland	D-12362	K7	0	K3	0.9999	k8
S4D7	Peru	highland	D-12222	K7	0	K3	0.9999	k8
S4H10	Peru	highland	CHEN-413	K7	0	K3	0.9999	k8
S1A2	Peru	highland	CHEN-349	K8	0	K3	0.9999	k8
S1C10	Peru	highland	CHEN-382	K8	0	K3	0.9999	k8
S1H10	Peru	highland	D-12405	K8	0	K3	0.9999	k8
S1H11	Peru	highland	D-12411	K8	0	K3	0.9999	k8
S3E9	Peru	highland	D-12256	K8	0	K3	0.9999	k8
S3G3	Bolivia	highland	D-12181	K8	0	K3	0.9999	k8
S4D11	Peru	highland	D-12162	K8	0	K3	0.9999	k8
S4D6	Peru	highland	D-12362	K8	0	K3	0.9999	k8
S4D7	Peru	highland	D-12222	K8	0	K3	0.9999	k8
S4H10	Peru	highland	CHEN-413	K8	0	K3	0.9999	k8
S1A2	Peru	highland	CHEN-349	K9	0	K3	0.9999	k8
S1C10	Peru	highland	CHEN-382	K9	0	K3	0.9999	k8
S1H10	Peru	highland	D-12405	K9	0	K3	0.9999	k8
S1H11	Peru	highland	D-12411	K9	0	K3	0.9999	k8
S3E9	Peru	highland	D-12256	K9	0	K3	0.9999	k8
S3G3	Bolivia	highland	D-12181	K9	0	K3	0.9999	k8
S4D11	Peru	highland	D-12162	K9	0	K3	0.9999	k8
S4D6	Peru	highland	D-12362	K9	0	K3	0.9999	k8
S4D7	Peru	highland	D-12222	K9	0	K3	0.9999	k8
S4H10	Peru	highland	CHEN-413	K9	0	K3	0.9999	k8
S2E7	Peru	highland	CHEN-342	K2	0	K3	0.9992	k8
S2E7	Peru	highland	CHEN-342	K3	0.9992	K3	0.9992	k8
S2E7	Peru	highland	CHEN-342	K4	0	K3	0.9992	k8
S2E7	Peru	highland	CHEN-342	K5	0.0007	K3	0.9992	k8
S2E7	Peru	highland	CHEN-342	K6	0	K3	0.9992	k8
S2E7	Peru	highland	CHEN-342	K7	0	K3	0.9992	k8
S2E7	Peru	highland	CHEN-342	K8	0	K3	0.9992	k8
S2E7	Peru	highland	CHEN-342	K9	0	K3	0.9992	k8
S1C4	Peru	highland	D-12211	K2	0	K3	0.9986	k8
S1C4	Peru	highland	D-12211	K3	0.9986	K3	0.9986	k8
S1C4	Peru	highland	D-12211	K4	0	K3	0.9986	k8
S1C4	Peru	highland	D-12211	K5	0.0014	K3	0.9986	k8
S1C4	Peru	highland	D-12211	K6	0	K3	0.9986	k8
S1C4	Peru	highland	D-12211	K7	0	K3	0.9986	k8
S1C4	Peru	highland	D-12211	K8	0	K3	0.9986	k8
S1C4	Peru	highland	D-12211	K9	0	K3	0.9986	k8
S1C3	Peru	highland	D-12205	K2	0	K3	0.9956	k8
S1C3	Peru	highland	D-12205	K3	0.9956	K3	0.9956	k8
S1C3	Peru	highland	D-12205	K4	0	K3	0.9956	k8
S1C3	Peru	highland	D-12205	K5	0.0043	K3	0.9956	k8
S1C3	Peru	highland	D-12205	K6	0	K3	0.9956	k8
S1C3	Peru	highland	D-12205	K7	0	K3	0.9956	k8
S1C3	Peru	highland	D-12205	K8	0	K3	0.9956	k8
S1C3	Peru	highland	D-12205	K9	0	K3	0.9956	k8
S2E3	Peru	highland	D-12119	K2	0	K3	0.9902	k8
S2E3	Peru	highland	D-12119	K3	0.9902	K3	0.9902	k8
S2E3	Peru	highland	D-12119	K4	0	K3	0.9902	k8
S2E3	Peru	highland	D-12119	K5	0.0098	K3	0.9902	k8
S2E3	Peru	highland	D-12119	K6	0	K3	0.9902	k8
S2E3	Peru	highland	D-12119	K7	0	K3	0.9902	k8
S2E3	Peru	highland	D-12119	K8	0	K3	0.9902	k8
S2E3	Peru	highland	D-12119	K9	0	K3	0.9902	k8
S1C7	Peru	highland	D-12167	K2	0	K3	0.9841	k8
S1C7	Peru	highland	D-12167	K3	0.9841	K3	0.9841	k8
S1C7	Peru	highland	D-12167	K4	0	K3	0.9841	k8
S1C7	Peru	highland	D-12167	K5	0.0158	K3	0.9841	k8
S1C7	Peru	highland	D-12167	K6	0	K3	0.9841	k8
S1C7	Peru	highland	D-12167	K7	0	K3	0.9841	k8
S1C7	Peru	highland	D-12167	K8	0	K3	0.9841	k8
S1C7	Peru	highland	D-12167	K9	0	K3	0.9841	k8
S2A9	Peru	highland	D-12416	K2	0	K3	0.9787	k8
S2A9	Peru	highland	D-12416	K3	0.9787	K3	0.9787	k8
S2A9	Peru	highland	D-12416	K4	0	K3	0.9787	k8
S2A9	Peru	highland	D-12416	K5	0	K3	0.9787	k8
S2A9	Peru	highland	D-12416	K6	0	K3	0.9787	k8
S2A9	Peru	highland	D-12416	K7	0	K3	0.9787	k8
S2A9	Peru	highland	D-12416	K8	0	K3	0.9787	k8
S2A9	Peru	highland	D-12416	K9	0.0212	K3	0.9787	k8
S1G4	Peru	highland	D-12345	K2	0	K3	0.957	k8
S1G4	Peru	highland	D-12345	K3	0.957	K3	0.957	k8
S1G4	Peru	highland	D-12345	K4	0	K3	0.957	k8
S1G4	Peru	highland	D-12345	K5	0.0012	K3	0.957	k8
S1G4	Peru	highland	D-12345	K6	0	K3	0.957	k8
S1G4	Peru	highland	D-12345	K7	0	K3	0.957	k8
S1G4	Peru	highland	D-12345	K8	0	K3	0.957	k8
S1G4	Peru	highland	D-12345	K9	0.0417	K3	0.957	k8
S1E11	Peru	highland	D-12175	K2	0	K3	0.9501	k8
S1E11	Peru	highland	D-12175	K3	0.9501	K3	0.9501	k8
S1E11	Peru	highland	D-12175	K4	0	K3	0.9501	k8
S1E11	Peru	highland	D-12175	K5	0	K3	0.9501	k8
S1E11	Peru	highland	D-12175	K6	0	K3	0.9501	k8
S1E11	Peru	highland	D-12175	K7	0	K3	0.9501	k8
S1E11	Peru	highland	D-12175	K8	0	K3	0.9501	k8
S1E11	Peru	highland	D-12175	K9	0.0499	K3	0.9501	k8
S3C6	Unknown	highland	Kancolla	K2	0	K3	0.9133	k8
S3C6	Unknown	highland	Kancolla	K3	0.9133	K3	0.9133	k8
S3C6	Unknown	highland	Kancolla	K4	0	K3	0.9133	k8
S3C6	Unknown	highland	Kancolla	K5	0	K3	0.9133	k8
S3C6	Unknown	highland	Kancolla	K6	0	K3	0.9133	k8
S3C6	Unknown	highland	Kancolla	K7	0.0524	K3	0.9133	k8
S3C6	Unknown	highland	Kancolla	K8	0	K3	0.9133	k8
S3C6	Unknown	highland	Kancolla	K9	0.0342	K3	0.9133	k8
S2F7	Peru	highland	PI-596498	K2	0	K3	0.9081	k8
S2F7	Peru	highland	PI-596498	K3	0.9081	K3	0.9081	k8
S2F7	Peru	highland	PI-596498	K4	0	K3	0.9081	k8
S2F7	Peru	highland	PI-596498	K5	0.0058	K3	0.9081	k8
S2F7	Peru	highland	PI-596498	K6	0	K3	0.9081	k8
S2F7	Peru	highland	PI-596498	K7	0	K3	0.9081	k8
S2F7	Peru	highland	PI-596498	K8	0	K3	0.9081	k8
S2F7	Peru	highland	PI-596498	K9	0.086	K3	0.9081	k8
S3B5	Bolivia	highland	PI-478418	K2	0	K3	0.8878	k8
S3B5	Bolivia	highland	PI-478418	K3	0.8878	K3	0.8878	k8
S3B5	Bolivia	highland	PI-478418	K4	0	K3	0.8878	k8
S3B5	Bolivia	highland	PI-478418	K5	0	K3	0.8878	k8
S3B5	Bolivia	highland	PI-478418	K6	0	K3	0.8878	k8
S3B5	Bolivia	highland	PI-478418	K7	0	K3	0.8878	k8
S3B5	Bolivia	highland	PI-478418	K8	0	K3	0.8878	k8
S3B5	Bolivia	highland	PI-478418	K9	0.1121	K3	0.8878	k8
S4F2	Peru	highland	D-12182	K2	0	K3	0.8648	k8
S4F2	Peru	highland	D-12182	K3	0.8648	K3	0.8648	k8
S4F2	Peru	highland	D-12182	K4	0.0356	K3	0.8648	k8
S4F2	Peru	highland	D-12182	K5	0	K3	0.8648	k8
S4F2	Peru	highland	D-12182	K6	0	K3	0.8648	k8
S4F2	Peru	highland	D-12182	K7	0.0127	K3	0.8648	k8
S4F2	Peru	highland	D-12182	K8	0	K3	0.8648	k8
S4F2	Peru	highland	D-12182	K9	0.0869	K3	0.8648	k8
S3D11	Unknown	highland	Ratuqui	K2	0	K3	0.8639	k8
S3D11	Unknown	highland	Ratuqui	K3	0.8639	K3	0.8639	k8
S3D11	Unknown	highland	Ratuqui	K4	0	K3	0.8639	k8
S3D11	Unknown	highland	Ratuqui	K5	0	K3	0.8639	k8
S3D11	Unknown	highland	Ratuqui	K6	0	K3	0.8639	k8
S3D11	Unknown	highland	Ratuqui	K7	0	K3	0.8639	k8
S3D11	Unknown	highland	Ratuqui	K8	0	K3	0.8639	k8
S3D11	Unknown	highland	Ratuqui	K9	0.136	K3	0.8639	k8
S2A5	Peru	highland	CHEN-256	K2	0	K3	0.8474	k8
S2A5	Peru	highland	CHEN-256	K3	0.8474	K3	0.8474	k8
S2A5	Peru	highland	CHEN-256	K4	0	K3	0.8474	k8
S2A5	Peru	highland	CHEN-256	K5	0.0037	K3	0.8474	k8
S2A5	Peru	highland	CHEN-256	K6	0	K3	0.8474	k8
S2A5	Peru	highland	CHEN-256	K7	0	K3	0.8474	k8
S2A5	Peru	highland	CHEN-256	K8	0	K3	0.8474	k8
S2A5	Peru	highland	CHEN-256	K9	0.1488	K3	0.8474	k8
S4E7	Bolivia	highland	PI-478414	K2	0	K3	0.8204	k8
S4E7	Bolivia	highland	PI-478414	K3	0.8204	K3	0.8204	k8
S4E7	Bolivia	highland	PI-478414	K4	0.0123	K3	0.8204	k8
S4E7	Bolivia	highland	PI-478414	K5	0	K3	0.8204	k8
S4E7	Bolivia	highland	PI-478414	K6	0	K3	0.8204	k8
S4E7	Bolivia	highland	PI-478414	K7	0.0379	K3	0.8204	k8
S4E7	Bolivia	highland	PI-478414	K8	0.0003	K3	0.8204	k8
S4E7	Bolivia	highland	PI-478414	K9	0.129	K3	0.8204	k8
S4A4	Peru	highland	D-12122	K2	0	K3	0.7813	k8
S4A4	Peru	highland	D-12122	K3	0.7813	K3	0.7813	k8
S4A4	Peru	highland	D-12122	K4	0	K3	0.7813	k8
S4A4	Peru	highland	D-12122	K5	0	K3	0.7813	k8
S4A4	Peru	highland	D-12122	K6	0	K3	0.7813	k8
S4A4	Peru	highland	D-12122	K7	0	K3	0.7813	k8
S4A4	Peru	highland	D-12122	K8	0.2187	K3	0.7813	k8
S4A4	Peru	highland	D-12122	K9	0	K3	0.7813	k8
S4B1	Peru	highland	D-12027	K2	0	K3	0.7256	k8
S4B1	Peru	highland	D-12027	K3	0.7256	K3	0.7256	k8
S4B1	Peru	highland	D-12027	K4	0	K3	0.7256	k8
S4B1	Peru	highland	D-12027	K5	0	K3	0.7256	k8
S4B1	Peru	highland	D-12027	K6	0	K3	0.7256	k8
S4B1	Peru	highland	D-12027	K7	0	K3	0.7256	k8
S4B1	Peru	highland	D-12027	K8	0.2571	K3	0.7256	k8
S4B1	Peru	highland	D-12027	K9	0.0173	K3	0.7256	k8
S3A4	United States	highland	Ames-13725	K2	0	K3	0.6595	k8
S3A4	United States	highland	Ames-13725	K3	0.6595	K3	0.6595	k8
S3A4	United States	highland	Ames-13725	K4	0	K3	0.6595	k8
S3A4	United States	highland	Ames-13725	K5	0	K3	0.6595	k8
S3A4	United States	highland	Ames-13725	K6	0	K3	0.6595	k8
S3A4	United States	highland	Ames-13725	K7	0	K3	0.6595	k8
S3A4	United States	highland	Ames-13725	K8	0	K3	0.6595	k8
S3A4	United States	highland	Ames-13725	K9	0.3404	K3	0.6595	k8
S4G6	Peru	highland	CHEN-425	K2	0	K3	0.6578	k8
S4G6	Peru	highland	CHEN-425	K3	0.6578	K3	0.6578	k8
S4G6	Peru	highland	CHEN-425	K4	0.3421	K3	0.6578	k8
S4G6	Peru	highland	CHEN-425	K5	0	K3	0.6578	k8
S4G6	Peru	highland	CHEN-425	K6	0	K3	0.6578	k8
S4G6	Peru	highland	CHEN-425	K7	0	K3	0.6578	k8
S4G6	Peru	highland	CHEN-425	K8	0	K3	0.6578	k8
S4G6	Peru	highland	CHEN-425	K9	0	K3	0.6578	k8
S1G11	Peru	highland	D-12184	K2	0	K3	0.5934	k8
S1G11	Peru	highland	D-12184	K3	0.5934	K3	0.5934	k8
S1G11	Peru	highland	D-12184	K4	0	K3	0.5934	k8
S1G11	Peru	highland	D-12184	K5	0.0042	K3	0.5934	k8
S1G11	Peru	highland	D-12184	K6	0	K3	0.5934	k8
S1G11	Peru	highland	D-12184	K7	0	K3	0.5934	k8
S1G11	Peru	highland	D-12184	K8	0	K3	0.5934	k8
S1G11	Peru	highland	D-12184	K9	0.4023	K3	0.5934	k8
S4G2	Bolivia	highland	D-12413	K2	0	K3	0.5895	k8
S4G2	Bolivia	highland	D-12413	K3	0.5895	K3	0.5895	k8
S4G2	Bolivia	highland	D-12413	K4	0.0682	K3	0.5895	k8
S4G2	Bolivia	highland	D-12413	K5	0.002	K3	0.5895	k8
S4G2	Bolivia	highland	D-12413	K6	0	K3	0.5895	k8
S4G2	Bolivia	highland	D-12413	K7	0.0888	K3	0.5895	k8
S4G2	Bolivia	highland	D-12413	K8	0.0014	K3	0.5895	k8
S4G2	Bolivia	highland	D-12413	K9	0.2501	K3	0.5895	k8
S1F4	Peru	highland	CHEN-424	K2	0	K3	0.5842	k8
S1F4	Peru	highland	CHEN-424	K3	0.5842	K3	0.5842	k8
S1F4	Peru	highland	CHEN-424	K4	0.3661	K3	0.5842	k8
S1F4	Peru	highland	CHEN-424	K5	0.0108	K3	0.5842	k8
S1F4	Peru	highland	CHEN-424	K6	0	K3	0.5842	k8
S1F4	Peru	highland	CHEN-424	K7	0	K3	0.5842	k8
S1F4	Peru	highland	CHEN-424	K8	0	K3	0.5842	k8
S1F4	Peru	highland	CHEN-424	K9	0.0388	K3	0.5842	k8
S1H3	Peru	highland	CHEN-420	K2	0	K3	0.5639	k8
S1H3	Peru	highland	CHEN-420	K3	0.5639	K3	0.5639	k8
S1H3	Peru	highland	CHEN-420	K4	0.1016	K3	0.5639	k8
S1H3	Peru	highland	CHEN-420	K5	0.019	K3	0.5639	k8
S1H3	Peru	highland	CHEN-420	K6	0	K3	0.5639	k8
S1H3	Peru	highland	CHEN-420	K7	0.1043	K3	0.5639	k8
S1H3	Peru	highland	CHEN-420	K8	0	K3	0.5639	k8
S1H3	Peru	highland	CHEN-420	K9	0.2112	K3	0.5639	k8
S4D10	Unknown	highland	Kamiri	K2	0	K3	0.4084	k8
S4D10	Unknown	highland	Kamiri	K3	0.4084	K3	0.4084	k8
S4D10	Unknown	highland	Kamiri	K4	0.0963	K3	0.4084	k8
S4D10	Unknown	highland	Kamiri	K5	0	K3	0.4084	k8
S4D10	Unknown	highland	Kamiri	K6	0	K3	0.4084	k8
S4D10	Unknown	highland	Kamiri	K7	0.2436	K3	0.4084	k8
S4D10	Unknown	highland	Kamiri	K8	0.0125	K3	0.4084	k8
S4D10	Unknown	highland	Kamiri	K9	0.2392	K3	0.4084	k8
S4G1	Peru	highland	CHEN-339	K2	0	K3	0.393	k8
S4G1	Peru	highland	CHEN-339	K3	0.393	K3	0.393	k8
S4G1	Peru	highland	CHEN-339	K4	0.2147	K3	0.393	k8
S4G1	Peru	highland	CHEN-339	K5	0	K3	0.393	k8
S4G1	Peru	highland	CHEN-339	K6	0	K3	0.393	k8
S4G1	Peru	highland	CHEN-339	K7	0.3258	K3	0.393	k8
S4G1	Peru	highland	CHEN-339	K8	0.0002	K3	0.393	k8
S4G1	Peru	highland	CHEN-339	K9	0.0663	K3	0.393	k8
S2A1	Peru	highland	D-12183	K2	0	K4	0.9999	k8
S3C5	Peru	highland	D-12350	K2	0	K4	0.9999	k8
S3F2	Peru	highland	CHEN-411	K2	0	K4	0.9999	k8
S4B2	Peru	highland	CHEN-212	K2	0	K4	0.9999	k8
S4G3	Peru	highland	CHEN-110	K2	0	K4	0.9999	k8
S4H2	Peru	highland	D-11927	K2	0	K4	0.9999	k8
S2A1	Peru	highland	D-12183	K3	0	K4	0.9999	k8
S3C5	Peru	highland	D-12350	K3	0	K4	0.9999	k8
S3F2	Peru	highland	CHEN-411	K3	0	K4	0.9999	k8
S4B2	Peru	highland	CHEN-212	K3	0	K4	0.9999	k8
S4G3	Peru	highland	CHEN-110	K3	0	K4	0.9999	k8
S4H2	Peru	highland	D-11927	K3	0	K4	0.9999	k8
S2A1	Peru	highland	D-12183	K4	0.9999	K4	0.9999	k8
S3C5	Peru	highland	D-12350	K4	0.9999	K4	0.9999	k8
S3F2	Peru	highland	CHEN-411	K4	0.9999	K4	0.9999	k8
S4B2	Peru	highland	CHEN-212	K4	0.9999	K4	0.9999	k8
S4G3	Peru	highland	CHEN-110	K4	0.9999	K4	0.9999	k8
S4H2	Peru	highland	D-11927	K4	0.9999	K4	0.9999	k8
S2A1	Peru	highland	D-12183	K5	0	K4	0.9999	k8
S3C5	Peru	highland	D-12350	K5	0	K4	0.9999	k8
S3F2	Peru	highland	CHEN-411	K5	0	K4	0.9999	k8
S4B2	Peru	highland	CHEN-212	K5	0	K4	0.9999	k8
S4G3	Peru	highland	CHEN-110	K5	0	K4	0.9999	k8
S4H2	Peru	highland	D-11927	K5	0	K4	0.9999	k8
S2A1	Peru	highland	D-12183	K6	0	K4	0.9999	k8
S3C5	Peru	highland	D-12350	K6	0	K4	0.9999	k8
S3F2	Peru	highland	CHEN-411	K6	0	K4	0.9999	k8
S4B2	Peru	highland	CHEN-212	K6	0	K4	0.9999	k8
S4G3	Peru	highland	CHEN-110	K6	0	K4	0.9999	k8
S4H2	Peru	highland	D-11927	K6	0	K4	0.9999	k8
S2A1	Peru	highland	D-12183	K7	0	K4	0.9999	k8
S3C5	Peru	highland	D-12350	K7	0	K4	0.9999	k8
S3F2	Peru	highland	CHEN-411	K7	0	K4	0.9999	k8
S4B2	Peru	highland	CHEN-212	K7	0	K4	0.9999	k8
S4G3	Peru	highland	CHEN-110	K7	0	K4	0.9999	k8
S4H2	Peru	highland	D-11927	K7	0	K4	0.9999	k8
S2A1	Peru	highland	D-12183	K8	0	K4	0.9999	k8
S3C5	Peru	highland	D-12350	K8	0	K4	0.9999	k8
S3F2	Peru	highland	CHEN-411	K8	0	K4	0.9999	k8
S4B2	Peru	highland	CHEN-212	K8	0	K4	0.9999	k8
S4G3	Peru	highland	CHEN-110	K8	0	K4	0.9999	k8
S4H2	Peru	highland	D-11927	K8	0	K4	0.9999	k8
S2A1	Peru	highland	D-12183	K9	0	K4	0.9999	k8
S3C5	Peru	highland	D-12350	K9	0	K4	0.9999	k8
S3F2	Peru	highland	CHEN-411	K9	0	K4	0.9999	k8
S4B2	Peru	highland	CHEN-212	K9	0	K4	0.9999	k8
S4G3	Peru	highland	CHEN-110	K9	0	K4	0.9999	k8
S4H2	Peru	highland	D-11927	K9	0	K4	0.9999	k8
S4B4	Bolivia	highland	CHEN-142	K2	0	K4	0.9938	k8
S4B4	Bolivia	highland	CHEN-142	K3	0	K4	0.9938	k8
S4B4	Bolivia	highland	CHEN-142	K4	0.9938	K4	0.9938	k8
S4B4	Bolivia	highland	CHEN-142	K5	0.0011	K4	0.9938	k8
S4B4	Bolivia	highland	CHEN-142	K6	0	K4	0.9938	k8
S4B4	Bolivia	highland	CHEN-142	K7	0	K4	0.9938	k8
S4B4	Bolivia	highland	CHEN-142	K8	0.005	K4	0.9938	k8
S4B4	Bolivia	highland	CHEN-142	K9	0	K4	0.9938	k8
S4D4	Peru	highland	CHEN-333	K2	0	K4	0.9393	k8
S4D4	Peru	highland	CHEN-333	K3	0.0606	K4	0.9393	k8
S4D4	Peru	highland	CHEN-333	K4	0.9393	K4	0.9393	k8
S4D4	Peru	highland	CHEN-333	K5	0	K4	0.9393	k8
S4D4	Peru	highland	CHEN-333	K6	0	K4	0.9393	k8
S4D4	Peru	highland	CHEN-333	K7	0	K4	0.9393	k8
S4D4	Peru	highland	CHEN-333	K8	0	K4	0.9393	k8
S4D4	Peru	highland	CHEN-333	K9	0	K4	0.9393	k8
10176	Unknown	highland	Pasankalla	K2	0	K4	0.8898	k8
10176	Unknown	highland	Pasankalla	K3	0.1085	K4	0.8898	k8
10176	Unknown	highland	Pasankalla	K4	0.8898	K4	0.8898	k8
10176	Unknown	highland	Pasankalla	K5	0	K4	0.8898	k8
10176	Unknown	highland	Pasankalla	K6	0	K4	0.8898	k8
10176	Unknown	highland	Pasankalla	K7	0.0011	K4	0.8898	k8
10176	Unknown	highland	Pasankalla	K8	0	K4	0.8898	k8
10176	Unknown	highland	Pasankalla	K9	0.0005	K4	0.8898	k8
S4H1	Unknown	highland	D-9977	K2	0	K4	0.8103	k8
S4H1	Unknown	highland	D-9977	K3	0	K4	0.8103	k8
S4H1	Unknown	highland	D-9977	K4	0.8103	K4	0.8103	k8
S4H1	Unknown	highland	D-9977	K5	0	K4	0.8103	k8
S4H1	Unknown	highland	D-9977	K6	0	K4	0.8103	k8
S4H1	Unknown	highland	D-9977	K7	0	K4	0.8103	k8
S4H1	Unknown	highland	D-9977	K8	0.1896	K4	0.8103	k8
S4H1	Unknown	highland	D-9977	K9	0	K4	0.8103	k8
S4F6	Unknown	highland	D-9985	K2	0	K4	0.6677	k8
S4F6	Unknown	highland	D-9985	K3	0	K4	0.6677	k8
S4F6	Unknown	highland	D-9985	K4	0.6677	K4	0.6677	k8
S4F6	Unknown	highland	D-9985	K5	0	K4	0.6677	k8
S4F6	Unknown	highland	D-9985	K6	0	K4	0.6677	k8
S4F6	Unknown	highland	D-9985	K7	0	K4	0.6677	k8
S4F6	Unknown	highland	D-9985	K8	0.3322	K4	0.6677	k8
S4F6	Unknown	highland	D-9985	K9	0	K4	0.6677	k8
S3H10	Unknown	highland	CICA-127	K2	0	K4	0.6638	k8
S3H10	Unknown	highland	CICA-127	K3	0	K4	0.6638	k8
S3H10	Unknown	highland	CICA-127	K4	0.6638	K4	0.6638	k8
S3H10	Unknown	highland	CICA-127	K5	0	K4	0.6638	k8
S3H10	Unknown	highland	CICA-127	K6	0	K4	0.6638	k8
S3H10	Unknown	highland	CICA-127	K7	0	K4	0.6638	k8
S3H10	Unknown	highland	CICA-127	K8	0.3362	K4	0.6638	k8
S3H10	Unknown	highland	CICA-127	K9	0	K4	0.6638	k8
S2G11	Peru	highland	CHEN-225	K2	0	K4	0.6617	k8
S2G11	Peru	highland	CHEN-225	K3	0	K4	0.6617	k8
S2G11	Peru	highland	CHEN-225	K4	0.6617	K4	0.6617	k8
S2G11	Peru	highland	CHEN-225	K5	0.0039	K4	0.6617	k8
S2G11	Peru	highland	CHEN-225	K6	0	K4	0.6617	k8
S2G11	Peru	highland	CHEN-225	K7	0	K4	0.6617	k8
S2G11	Peru	highland	CHEN-225	K8	0.3343	K4	0.6617	k8
S2G11	Peru	highland	CHEN-225	K9	0	K4	0.6617	k8
S2B4	Peru	highland	CHEN-423	K2	0	K4	0.6375	k8
S2B4	Peru	highland	CHEN-423	K3	0	K4	0.6375	k8
S2B4	Peru	highland	CHEN-423	K4	0.6375	K4	0.6375	k8
S2B4	Peru	highland	CHEN-423	K5	0	K4	0.6375	k8
S2B4	Peru	highland	CHEN-423	K6	0	K4	0.6375	k8
S2B4	Peru	highland	CHEN-423	K7	0	K4	0.6375	k8
S2B4	Peru	highland	CHEN-423	K8	0.3625	K4	0.6375	k8
S2B4	Peru	highland	CHEN-423	K9	0	K4	0.6375	k8
S3B6	Unknown	highland	Bouchane-2	K2	0	K4	0.621	k8
S3B6	Unknown	highland	Bouchane-2	K3	0.3098	K4	0.621	k8
S3B6	Unknown	highland	Bouchane-2	K4	0.621	K4	0.621	k8
S3B6	Unknown	highland	Bouchane-2	K5	0	K4	0.621	k8
S3B6	Unknown	highland	Bouchane-2	K6	0	K4	0.621	k8
S3B6	Unknown	highland	Bouchane-2	K7	0	K4	0.621	k8
S3B6	Unknown	highland	Bouchane-2	K8	0	K4	0.621	k8
S3B6	Unknown	highland	Bouchane-2	K9	0.0691	K4	0.621	k8
S3D7	Bolivia	highland	D-12424	K2	0	K4	0.5967	k8
S3D7	Bolivia	highland	D-12424	K3	0.2967	K4	0.5967	k8
S3D7	Bolivia	highland	D-12424	K4	0.5967	K4	0.5967	k8
S3D7	Bolivia	highland	D-12424	K5	0	K4	0.5967	k8
S3D7	Bolivia	highland	D-12424	K6	0	K4	0.5967	k8
S3D7	Bolivia	highland	D-12424	K7	0	K4	0.5967	k8
S3D7	Bolivia	highland	D-12424	K8	0	K4	0.5967	k8
S3D7	Bolivia	highland	D-12424	K9	0.1066	K4	0.5967	k8
S3D6	Chile	highland	BO-60	K2	0	K4	0.5849	k8
S3D6	Chile	highland	BO-60	K3	0.415	K4	0.5849	k8
S3D6	Chile	highland	BO-60	K4	0.5849	K4	0.5849	k8
S3D6	Chile	highland	BO-60	K5	0	K4	0.5849	k8
S3D6	Chile	highland	BO-60	K6	0	K4	0.5849	k8
S3D6	Chile	highland	BO-60	K7	0	K4	0.5849	k8
S3D6	Chile	highland	BO-60	K8	0	K4	0.5849	k8
S3D6	Chile	highland	BO-60	K9	0	K4	0.5849	k8
S2C2	Peru	highland	CHEN-65	K2	0	K4	0.5846	k8
S2C2	Peru	highland	CHEN-65	K3	0.4154	K4	0.5846	k8
S2C2	Peru	highland	CHEN-65	K4	0.5846	K4	0.5846	k8
S2C2	Peru	highland	CHEN-65	K5	0	K4	0.5846	k8
S2C2	Peru	highland	CHEN-65	K6	0	K4	0.5846	k8
S2C2	Peru	highland	CHEN-65	K7	0	K4	0.5846	k8
S2C2	Peru	highland	CHEN-65	K8	0	K4	0.5846	k8
S2C2	Peru	highland	CHEN-65	K9	0	K4	0.5846	k8
S4A3	Peru	highland	CHEN-376	K2	0	K4	0.5774	k8
S4A3	Peru	highland	CHEN-376	K3	0.3216	K4	0.5774	k8
S4A3	Peru	highland	CHEN-376	K4	0.5774	K4	0.5774	k8
S4A3	Peru	highland	CHEN-376	K5	0.007	K4	0.5774	k8
S4A3	Peru	highland	CHEN-376	K6	0.0007	K4	0.5774	k8
S4A3	Peru	highland	CHEN-376	K7	0.076	K4	0.5774	k8
S4A3	Peru	highland	CHEN-376	K8	0.0173	K4	0.5774	k8
S4A3	Peru	highland	CHEN-376	K9	0	K4	0.5774	k8
S4E4	Peru	highland	CHEN-401	K2	0	K4	0.5626	k8
S4E4	Peru	highland	CHEN-401	K3	0	K4	0.5626	k8
S4E4	Peru	highland	CHEN-401	K4	0.5626	K4	0.5626	k8
S4E4	Peru	highland	CHEN-401	K5	0	K4	0.5626	k8
S4E4	Peru	highland	CHEN-401	K6	0	K4	0.5626	k8
S4E4	Peru	highland	CHEN-401	K7	0	K4	0.5626	k8
S4E4	Peru	highland	CHEN-401	K8	0.4374	K4	0.5626	k8
S4E4	Peru	highland	CHEN-401	K9	0	K4	0.5626	k8
S4H5	Peru	highland	D-12081	K2	0	K4	0.5566	k8
S4H5	Peru	highland	D-12081	K3	0.0218	K4	0.5566	k8
S4H5	Peru	highland	D-12081	K4	0.5566	K4	0.5566	k8
S4H5	Peru	highland	D-12081	K5	0	K4	0.5566	k8
S4H5	Peru	highland	D-12081	K6	0	K4	0.5566	k8
S4H5	Peru	highland	D-12081	K7	0	K4	0.5566	k8
S4H5	Peru	highland	D-12081	K8	0.4216	K4	0.5566	k8
S4H5	Peru	highland	D-12081	K9	0	K4	0.5566	k8
S4D3	Peru	highland	D-12389	K2	0	K4	0.5524	k8
S4D3	Peru	highland	D-12389	K3	0.4475	K4	0.5524	k8
S4D3	Peru	highland	D-12389	K4	0.5524	K4	0.5524	k8
S4D3	Peru	highland	D-12389	K5	0	K4	0.5524	k8
S4D3	Peru	highland	D-12389	K6	0	K4	0.5524	k8
S4D3	Peru	highland	D-12389	K7	0	K4	0.5524	k8
S4D3	Peru	highland	D-12389	K8	0	K4	0.5524	k8
S4D3	Peru	highland	D-12389	K9	0	K4	0.5524	k8
S3H3	Peru	highland	03-21-072RM	K2	0	K4	0.5098	k8
S3H3	Peru	highland	03-21-072RM	K3	0.4901	K4	0.5098	k8
S3H3	Peru	highland	03-21-072RM	K4	0.5098	K4	0.5098	k8
S3H3	Peru	highland	03-21-072RM	K5	0	K4	0.5098	k8
S3H3	Peru	highland	03-21-072RM	K6	0	K4	0.5098	k8
S3H3	Peru	highland	03-21-072RM	K7	0	K4	0.5098	k8
S3H3	Peru	highland	03-21-072RM	K8	0	K4	0.5098	k8
S3H3	Peru	highland	03-21-072RM	K9	0	K4	0.5098	k8
S4G10	Peru	highland	CHEN-384	K2	0	K4	0.5092	k8
S4G10	Peru	highland	CHEN-384	K3	0.1006	K4	0.5092	k8
S4G10	Peru	highland	CHEN-384	K4	0.5092	K4	0.5092	k8
S4G10	Peru	highland	CHEN-384	K5	0	K4	0.5092	k8
S4G10	Peru	highland	CHEN-384	K6	0	K4	0.5092	k8
S4G10	Peru	highland	CHEN-384	K7	0	K4	0.5092	k8
S4G10	Peru	highland	CHEN-384	K8	0.3902	K4	0.5092	k8
S4G10	Peru	highland	CHEN-384	K9	0	K4	0.5092	k8
S4D1	Australia	highland	PI-665272	K2	0	K4	0.509	k8
S4D1	Australia	highland	PI-665272	K3	0.4909	K4	0.509	k8
S4D1	Australia	highland	PI-665272	K4	0.509	K4	0.509	k8
S4D1	Australia	highland	PI-665272	K5	0	K4	0.509	k8
S4D1	Australia	highland	PI-665272	K6	0	K4	0.509	k8
S4D1	Australia	highland	PI-665272	K7	0	K4	0.509	k8
S4D1	Australia	highland	PI-665272	K8	0	K4	0.509	k8
S4D1	Australia	highland	PI-665272	K9	0	K4	0.509	k8
S4C1	Peru	highland	CHEN-383	K2	0	K4	0.4859	k8
S4C1	Peru	highland	CHEN-383	K3	0.4766	K4	0.4859	k8
S4C1	Peru	highland	CHEN-383	K4	0.4859	K4	0.4859	k8
S4C1	Peru	highland	CHEN-383	K5	0	K4	0.4859	k8
S4C1	Peru	highland	CHEN-383	K6	0	K4	0.4859	k8
S4C1	Peru	highland	CHEN-383	K7	0.0303	K4	0.4859	k8
S4C1	Peru	highland	CHEN-383	K8	0.0053	K4	0.4859	k8
S4C1	Peru	highland	CHEN-383	K9	0.0019	K4	0.4859	k8
S4E3	Peru	highland	CHEN-433	K2	0	K4	0.4745	k8
S4E3	Peru	highland	CHEN-433	K3	0.426	K4	0.4745	k8
S4E3	Peru	highland	CHEN-433	K4	0.4745	K4	0.4745	k8
S4E3	Peru	highland	CHEN-433	K5	0	K4	0.4745	k8
S4E3	Peru	highland	CHEN-433	K6	0	K4	0.4745	k8
S4E3	Peru	highland	CHEN-433	K7	0	K4	0.4745	k8
S4E3	Peru	highland	CHEN-433	K8	0	K4	0.4745	k8
S4E3	Peru	highland	CHEN-433	K9	0.0994	K4	0.4745	k8
S4A2	Peru	highland	CHEN-358	K2	0	K4	0.4278	k8
S4A2	Peru	highland	CHEN-358	K3	0.1214	K4	0.4278	k8
S4A2	Peru	highland	CHEN-358	K4	0.4278	K4	0.4278	k8
S4A2	Peru	highland	CHEN-358	K5	0	K4	0.4278	k8
S4A2	Peru	highland	CHEN-358	K6	0	K4	0.4278	k8
S4A2	Peru	highland	CHEN-358	K7	0	K4	0.4278	k8
S4A2	Peru	highland	CHEN-358	K8	0.4138	K4	0.4278	k8
S4A2	Peru	highland	CHEN-358	K9	0.037	K4	0.4278	k8
S3B3	Peru	highland	D-12120	K2	0	K4	0.3407	k8
S3B3	Peru	highland	D-12120	K3	0.2959	K4	0.3407	k8
S3B3	Peru	highland	D-12120	K4	0.3407	K4	0.3407	k8
S3B3	Peru	highland	D-12120	K5	0	K4	0.3407	k8
S3B3	Peru	highland	D-12120	K6	0	K4	0.3407	k8
S3B3	Peru	highland	D-12120	K7	0.0477	K4	0.3407	k8
S3B3	Peru	highland	D-12120	K8	0.1673	K4	0.3407	k8
S3B3	Peru	highland	D-12120	K9	0.1483	K4	0.3407	k8
S4C3	Peru	highland	CHEN-412	K2	0	K4	0.3289	k8
S4C3	Peru	highland	CHEN-412	K3	0.0504	K4	0.3289	k8
S4C3	Peru	highland	CHEN-412	K4	0.3289	K4	0.3289	k8
S4C3	Peru	highland	CHEN-412	K5	0	K4	0.3289	k8
S4C3	Peru	highland	CHEN-412	K6	0	K4	0.3289	k8
S4C3	Peru	highland	CHEN-412	K7	0.3017	K4	0.3289	k8
S4C3	Peru	highland	CHEN-412	K8	0.1923	K4	0.3289	k8
S4C3	Peru	highland	CHEN-412	K9	0.1266	K4	0.3289	k8
S2B3	Peru	highland	D-12079	K2	0	K4	0.2727	k8
S2B3	Peru	highland	D-12079	K3	0.2105	K4	0.2727	k8
S2B3	Peru	highland	D-12079	K4	0.2727	K4	0.2727	k8
S2B3	Peru	highland	D-12079	K5	0.0086	K4	0.2727	k8
S2B3	Peru	highland	D-12079	K6	0.003	K4	0.2727	k8
S2B3	Peru	highland	D-12079	K7	0	K4	0.2727	k8
S2B3	Peru	highland	D-12079	K8	0.2368	K4	0.2727	k8
S2B3	Peru	highland	D-12079	K9	0.2683	K4	0.2727	k8
S1A5	Unknown	lowland	NSL-86628	K2	0	K5	0.9999	k8
S1A6	United States	lowland	Ames-13744	K2	0	K5	0.9999	k8
S1B9	Chile	lowland	PI-584524	K2	0	K5	0.9999	k8
S1C1	Unknown	lowland	ICBA-Q5	K2	0	K5	0.9999	k8
S1D1	Chile	lowland	PI-614889	K2	0	K5	0.9999	k8
S1D6	Unknown	lowland	Oro-de-Valle	K2	0	K5	0.9999	k8
S1E3	Chile	lowland	Javi	K2	0	K5	0.9999	k8
S1E4	Unknown	lowland	Indian Quinoa	K2	0	K5	0.9999	k8
S1E6	United States	lowland	Ames-13745	K2	0	K5	0.9999	k8
S1G1	Chile	lowland	BO-55	K2	0	K5	0.9999	k8
S1G5	Unknown	lowland	Brightest-Brilliant-Rainbow	K2	0	K5	0.9999	k8
S1G7	Chile	lowland	PI-634917	K2	0	K5	0.9999	k8
S1G8	Chile	lowland	PUC-mix-green	K2	0	K5	0.9999	k8
S1H1	Unknown	lowland	Ames19047	K2	0	K5	0.9999	k8
S1H5	Chile	lowland	PI-614887	K2	0	K5	0.9999	k8
S1H6	Chile	lowland	BO-40	K2	0	K5	0.9999	k8
S2D1	Chile	lowland	BO-46-2	K2	0	K5	0.9999	k8
S2F1	Chile	lowland	PI-634923	K2	0	K5	0.9999	k8
S2F4	Unknown	lowland	PI584524	K2	0	K5	0.9999	k8
S3A6	Unknown	lowland	Bouchane-1	K2	0	K5	0.9999	k8
S3F1	United States	lowland	Ames-13732	K2	0	K5	0.9999	k8
S3H5	Peru	lowland	CHEN-344	K2	0	K5	0.9999	k8
S4B7	United States	lowland	PI-665283	K2	0	K5	0.9999	k8
S4F11	United States	lowland	Ames-13737	K2	0	K5	0.9999	k8
S4G8	Chile	lowland	Nde-09	K2	0	K5	0.9999	k8
S1A5	Unknown	lowland	NSL-86628	K3	0	K5	0.9999	k8
S1A6	United States	lowland	Ames-13744	K3	0	K5	0.9999	k8
S1B9	Chile	lowland	PI-584524	K3	0	K5	0.9999	k8
S1C1	Unknown	lowland	ICBA-Q5	K3	0	K5	0.9999	k8
S1D1	Chile	lowland	PI-614889	K3	0	K5	0.9999	k8
S1D6	Unknown	lowland	Oro-de-Valle	K3	0	K5	0.9999	k8
S1E3	Chile	lowland	Javi	K3	0	K5	0.9999	k8
S1E4	Unknown	lowland	Indian Quinoa	K3	0	K5	0.9999	k8
S1E6	United States	lowland	Ames-13745	K3	0	K5	0.9999	k8
S1G1	Chile	lowland	BO-55	K3	0	K5	0.9999	k8
S1G5	Unknown	lowland	Brightest-Brilliant-Rainbow	K3	0	K5	0.9999	k8
S1G7	Chile	lowland	PI-634917	K3	0	K5	0.9999	k8
S1G8	Chile	lowland	PUC-mix-green	K3	0	K5	0.9999	k8
S1H1	Unknown	lowland	Ames19047	K3	0	K5	0.9999	k8
S1H5	Chile	lowland	PI-614887	K3	0	K5	0.9999	k8
S1H6	Chile	lowland	BO-40	K3	0	K5	0.9999	k8
S2D1	Chile	lowland	BO-46-2	K3	0	K5	0.9999	k8
S2F1	Chile	lowland	PI-634923	K3	0	K5	0.9999	k8
S2F4	Unknown	lowland	PI584524	K3	0	K5	0.9999	k8
S3A6	Unknown	lowland	Bouchane-1	K3	0	K5	0.9999	k8
S3F1	United States	lowland	Ames-13732	K3	0	K5	0.9999	k8
S3H5	Peru	lowland	CHEN-344	K3	0	K5	0.9999	k8
S4B7	United States	lowland	PI-665283	K3	0	K5	0.9999	k8
S4F11	United States	lowland	Ames-13737	K3	0	K5	0.9999	k8
S4G8	Chile	lowland	Nde-09	K3	0	K5	0.9999	k8
S1A5	Unknown	lowland	NSL-86628	K4	0	K5	0.9999	k8
S1A6	United States	lowland	Ames-13744	K4	0	K5	0.9999	k8
S1B9	Chile	lowland	PI-584524	K4	0	K5	0.9999	k8
S1C1	Unknown	lowland	ICBA-Q5	K4	0	K5	0.9999	k8
S1D1	Chile	lowland	PI-614889	K4	0	K5	0.9999	k8
S1D6	Unknown	lowland	Oro-de-Valle	K4	0	K5	0.9999	k8
S1E3	Chile	lowland	Javi	K4	0	K5	0.9999	k8
S1E4	Unknown	lowland	Indian Quinoa	K4	0	K5	0.9999	k8
S1E6	United States	lowland	Ames-13745	K4	0	K5	0.9999	k8
S1G1	Chile	lowland	BO-55	K4	0	K5	0.9999	k8
S1G5	Unknown	lowland	Brightest-Brilliant-Rainbow	K4	0	K5	0.9999	k8
S1G7	Chile	lowland	PI-634917	K4	0	K5	0.9999	k8
S1G8	Chile	lowland	PUC-mix-green	K4	0	K5	0.9999	k8
S1H1	Unknown	lowland	Ames19047	K4	0	K5	0.9999	k8
S1H5	Chile	lowland	PI-614887	K4	0	K5	0.9999	k8
S1H6	Chile	lowland	BO-40	K4	0	K5	0.9999	k8
S2D1	Chile	lowland	BO-46-2	K4	0	K5	0.9999	k8
S2F1	Chile	lowland	PI-634923	K4	0	K5	0.9999	k8
S2F4	Unknown	lowland	PI584524	K4	0	K5	0.9999	k8
S3A6	Unknown	lowland	Bouchane-1	K4	0	K5	0.9999	k8
S3F1	United States	lowland	Ames-13732	K4	0	K5	0.9999	k8
S3H5	Peru	lowland	CHEN-344	K4	0	K5	0.9999	k8
S4B7	United States	lowland	PI-665283	K4	0	K5	0.9999	k8
S4F11	United States	lowland	Ames-13737	K4	0	K5	0.9999	k8
S4G8	Chile	lowland	Nde-09	K4	0	K5	0.9999	k8
S1A5	Unknown	lowland	NSL-86628	K5	0.9999	K5	0.9999	k8
S1A6	United States	lowland	Ames-13744	K5	0.9999	K5	0.9999	k8
S1B9	Chile	lowland	PI-584524	K5	0.9999	K5	0.9999	k8
S1C1	Unknown	lowland	ICBA-Q5	K5	0.9999	K5	0.9999	k8
S1D1	Chile	lowland	PI-614889	K5	0.9999	K5	0.9999	k8
S1D6	Unknown	lowland	Oro-de-Valle	K5	0.9999	K5	0.9999	k8
S1E3	Chile	lowland	Javi	K5	0.9999	K5	0.9999	k8
S1E4	Unknown	lowland	Indian Quinoa	K5	0.9999	K5	0.9999	k8
S1E6	United States	lowland	Ames-13745	K5	0.9999	K5	0.9999	k8
S1G1	Chile	lowland	BO-55	K5	0.9999	K5	0.9999	k8
S1G5	Unknown	lowland	Brightest-Brilliant-Rainbow	K5	0.9999	K5	0.9999	k8
S1G7	Chile	lowland	PI-634917	K5	0.9999	K5	0.9999	k8
S1G8	Chile	lowland	PUC-mix-green	K5	0.9999	K5	0.9999	k8
S1H1	Unknown	lowland	Ames19047	K5	0.9999	K5	0.9999	k8
S1H5	Chile	lowland	PI-614887	K5	0.9999	K5	0.9999	k8
S1H6	Chile	lowland	BO-40	K5	0.9999	K5	0.9999	k8
S2D1	Chile	lowland	BO-46-2	K5	0.9999	K5	0.9999	k8
S2F1	Chile	lowland	PI-634923	K5	0.9999	K5	0.9999	k8
S2F4	Unknown	lowland	PI584524	K5	0.9999	K5	0.9999	k8
S3A6	Unknown	lowland	Bouchane-1	K5	0.9999	K5	0.9999	k8
S3F1	United States	lowland	Ames-13732	K5	0.9999	K5	0.9999	k8
S3H5	Peru	lowland	CHEN-344	K5	0.9999	K5	0.9999	k8
S4B7	United States	lowland	PI-665283	K5	0.9999	K5	0.9999	k8
S4F11	United States	lowland	Ames-13737	K5	0.9999	K5	0.9999	k8
S4G8	Chile	lowland	Nde-09	K5	0.9999	K5	0.9999	k8
S1A5	Unknown	lowland	NSL-86628	K6	0	K5	0.9999	k8
S1A6	United States	lowland	Ames-13744	K6	0	K5	0.9999	k8
S1B9	Chile	lowland	PI-584524	K6	0	K5	0.9999	k8
S1C1	Unknown	lowland	ICBA-Q5	K6	0	K5	0.9999	k8
S1D1	Chile	lowland	PI-614889	K6	0	K5	0.9999	k8
S1D6	Unknown	lowland	Oro-de-Valle	K6	0	K5	0.9999	k8
S1E3	Chile	lowland	Javi	K6	0	K5	0.9999	k8
S1E4	Unknown	lowland	Indian Quinoa	K6	0	K5	0.9999	k8
S1E6	United States	lowland	Ames-13745	K6	0	K5	0.9999	k8
S1G1	Chile	lowland	BO-55	K6	0	K5	0.9999	k8
S1G5	Unknown	lowland	Brightest-Brilliant-Rainbow	K6	0	K5	0.9999	k8
S1G7	Chile	lowland	PI-634917	K6	0	K5	0.9999	k8
S1G8	Chile	lowland	PUC-mix-green	K6	0	K5	0.9999	k8
S1H1	Unknown	lowland	Ames19047	K6	0	K5	0.9999	k8
S1H5	Chile	lowland	PI-614887	K6	0	K5	0.9999	k8
S1H6	Chile	lowland	BO-40	K6	0	K5	0.9999	k8
S2D1	Chile	lowland	BO-46-2	K6	0	K5	0.9999	k8
S2F1	Chile	lowland	PI-634923	K6	0	K5	0.9999	k8
S2F4	Unknown	lowland	PI584524	K6	0	K5	0.9999	k8
S3A6	Unknown	lowland	Bouchane-1	K6	0	K5	0.9999	k8
S3F1	United States	lowland	Ames-13732	K6	0	K5	0.9999	k8
S3H5	Peru	lowland	CHEN-344	K6	0	K5	0.9999	k8
S4B7	United States	lowland	PI-665283	K6	0	K5	0.9999	k8
S4F11	United States	lowland	Ames-13737	K6	0	K5	0.9999	k8
S4G8	Chile	lowland	Nde-09	K6	0	K5	0.9999	k8
S1A5	Unknown	lowland	NSL-86628	K7	0	K5	0.9999	k8
S1A6	United States	lowland	Ames-13744	K7	0	K5	0.9999	k8
S1B9	Chile	lowland	PI-584524	K7	0	K5	0.9999	k8
S1C1	Unknown	lowland	ICBA-Q5	K7	0	K5	0.9999	k8
S1D1	Chile	lowland	PI-614889	K7	0	K5	0.9999	k8
S1D6	Unknown	lowland	Oro-de-Valle	K7	0	K5	0.9999	k8
S1E3	Chile	lowland	Javi	K7	0	K5	0.9999	k8
S1E4	Unknown	lowland	Indian Quinoa	K7	0	K5	0.9999	k8
S1E6	United States	lowland	Ames-13745	K7	0	K5	0.9999	k8
S1G1	Chile	lowland	BO-55	K7	0	K5	0.9999	k8
S1G5	Unknown	lowland	Brightest-Brilliant-Rainbow	K7	0	K5	0.9999	k8
S1G7	Chile	lowland	PI-634917	K7	0	K5	0.9999	k8
S1G8	Chile	lowland	PUC-mix-green	K7	0	K5	0.9999	k8
S1H1	Unknown	lowland	Ames19047	K7	0	K5	0.9999	k8
S1H5	Chile	lowland	PI-614887	K7	0	K5	0.9999	k8
S1H6	Chile	lowland	BO-40	K7	0	K5	0.9999	k8
S2D1	Chile	lowland	BO-46-2	K7	0	K5	0.9999	k8
S2F1	Chile	lowland	PI-634923	K7	0	K5	0.9999	k8
S2F4	Unknown	lowland	PI584524	K7	0	K5	0.9999	k8
S3A6	Unknown	lowland	Bouchane-1	K7	0	K5	0.9999	k8
S3F1	United States	lowland	Ames-13732	K7	0	K5	0.9999	k8
S3H5	Peru	lowland	CHEN-344	K7	0	K5	0.9999	k8
S4B7	United States	lowland	PI-665283	K7	0	K5	0.9999	k8
S4F11	United States	lowland	Ames-13737	K7	0	K5	0.9999	k8
S4G8	Chile	lowland	Nde-09	K7	0	K5	0.9999	k8
S1A5	Unknown	lowland	NSL-86628	K8	0	K5	0.9999	k8
S1A6	United States	lowland	Ames-13744	K8	0	K5	0.9999	k8
S1B9	Chile	lowland	PI-584524	K8	0	K5	0.9999	k8
S1C1	Unknown	lowland	ICBA-Q5	K8	0	K5	0.9999	k8
S1D1	Chile	lowland	PI-614889	K8	0	K5	0.9999	k8
S1D6	Unknown	lowland	Oro-de-Valle	K8	0	K5	0.9999	k8
S1E3	Chile	lowland	Javi	K8	0	K5	0.9999	k8
S1E4	Unknown	lowland	Indian Quinoa	K8	0	K5	0.9999	k8
S1E6	United States	lowland	Ames-13745	K8	0	K5	0.9999	k8
S1G1	Chile	lowland	BO-55	K8	0	K5	0.9999	k8
S1G5	Unknown	lowland	Brightest-Brilliant-Rainbow	K8	0	K5	0.9999	k8
S1G7	Chile	lowland	PI-634917	K8	0	K5	0.9999	k8
S1G8	Chile	lowland	PUC-mix-green	K8	0	K5	0.9999	k8
S1H1	Unknown	lowland	Ames19047	K8	0	K5	0.9999	k8
S1H5	Chile	lowland	PI-614887	K8	0	K5	0.9999	k8
S1H6	Chile	lowland	BO-40	K8	0	K5	0.9999	k8
S2D1	Chile	lowland	BO-46-2	K8	0	K5	0.9999	k8
S2F1	Chile	lowland	PI-634923	K8	0	K5	0.9999	k8
S2F4	Unknown	lowland	PI584524	K8	0	K5	0.9999	k8
S3A6	Unknown	lowland	Bouchane-1	K8	0	K5	0.9999	k8
S3F1	United States	lowland	Ames-13732	K8	0	K5	0.9999	k8
S3H5	Peru	lowland	CHEN-344	K8	0	K5	0.9999	k8
S4B7	United States	lowland	PI-665283	K8	0	K5	0.9999	k8
S4F11	United States	lowland	Ames-13737	K8	0	K5	0.9999	k8
S4G8	Chile	lowland	Nde-09	K8	0	K5	0.9999	k8
S1A5	Unknown	lowland	NSL-86628	K9	0	K5	0.9999	k8
S1A6	United States	lowland	Ames-13744	K9	0	K5	0.9999	k8
S1B9	Chile	lowland	PI-584524	K9	0	K5	0.9999	k8
S1C1	Unknown	lowland	ICBA-Q5	K9	0	K5	0.9999	k8
S1D1	Chile	lowland	PI-614889	K9	0	K5	0.9999	k8
S1D6	Unknown	lowland	Oro-de-Valle	K9	0	K5	0.9999	k8
S1E3	Chile	lowland	Javi	K9	0	K5	0.9999	k8
S1E4	Unknown	lowland	Indian Quinoa	K9	0	K5	0.9999	k8
S1E6	United States	lowland	Ames-13745	K9	0	K5	0.9999	k8
S1G1	Chile	lowland	BO-55	K9	0	K5	0.9999	k8
S1G5	Unknown	lowland	Brightest-Brilliant-Rainbow	K9	0	K5	0.9999	k8
S1G7	Chile	lowland	PI-634917	K9	0	K5	0.9999	k8
S1G8	Chile	lowland	PUC-mix-green	K9	0	K5	0.9999	k8
S1H1	Unknown	lowland	Ames19047	K9	0	K5	0.9999	k8
S1H5	Chile	lowland	PI-614887	K9	0	K5	0.9999	k8
S1H6	Chile	lowland	BO-40	K9	0	K5	0.9999	k8
S2D1	Chile	lowland	BO-46-2	K9	0	K5	0.9999	k8
S2F1	Chile	lowland	PI-634923	K9	0	K5	0.9999	k8
S2F4	Unknown	lowland	PI584524	K9	0	K5	0.9999	k8
S3A6	Unknown	lowland	Bouchane-1	K9	0	K5	0.9999	k8
S3F1	United States	lowland	Ames-13732	K9	0	K5	0.9999	k8
S3H5	Peru	lowland	CHEN-344	K9	0	K5	0.9999	k8
S4B7	United States	lowland	PI-665283	K9	0	K5	0.9999	k8
S4F11	United States	lowland	Ames-13737	K9	0	K5	0.9999	k8
S4G8	Chile	lowland	Nde-09	K9	0	K5	0.9999	k8
S2A4	United States	lowland	Ames-13731	K2	0	K5	0.9996	k8
S2A4	United States	lowland	Ames-13731	K3	0	K5	0.9996	k8
S2A4	United States	lowland	Ames-13731	K4	0	K5	0.9996	k8
S2A4	United States	lowland	Ames-13731	K5	0.9996	K5	0.9996	k8
S2A4	United States	lowland	Ames-13731	K6	0	K5	0.9996	k8
S2A4	United States	lowland	Ames-13731	K7	0	K5	0.9996	k8
S2A4	United States	lowland	Ames-13731	K8	0	K5	0.9996	k8
S2A4	United States	lowland	Ames-13731	K9	0.0004	K5	0.9996	k8
S2D3	Unknown	lowland	Redhead	K2	0	K5	0.9977	k8
S2D3	Unknown	lowland	Redhead	K3	0	K5	0.9977	k8
S2D3	Unknown	lowland	Redhead	K4	0	K5	0.9977	k8
S2D3	Unknown	lowland	Redhead	K5	0.9977	K5	0.9977	k8
S2D3	Unknown	lowland	Redhead	K6	0.0023	K5	0.9977	k8
S2D3	Unknown	lowland	Redhead	K7	0	K5	0.9977	k8
S2D3	Unknown	lowland	Redhead	K8	0	K5	0.9977	k8
S2D3	Unknown	lowland	Redhead	K9	0	K5	0.9977	k8
S2A6	Unknown	lowland	NSL-91567	K2	0	K5	0.9969	k8
S2A6	Unknown	lowland	NSL-91567	K3	0.0002	K5	0.9969	k8
S2A6	Unknown	lowland	NSL-91567	K4	0	K5	0.9969	k8
S2A6	Unknown	lowland	NSL-91567	K5	0.9969	K5	0.9969	k8
S2A6	Unknown	lowland	NSL-91567	K6	0	K5	0.9969	k8
S2A6	Unknown	lowland	NSL-91567	K7	0	K5	0.9969	k8
S2A6	Unknown	lowland	NSL-91567	K8	0	K5	0.9969	k8
S2A6	Unknown	lowland	NSL-91567	K9	0.0029	K5	0.9969	k8
S2C10	Argentina	lowland	D-11889	K2	0	K5	0.9966	k8
S2C10	Argentina	lowland	D-11889	K3	0	K5	0.9966	k8
S2C10	Argentina	lowland	D-11889	K4	0	K5	0.9966	k8
S2C10	Argentina	lowland	D-11889	K5	0.9966	K5	0.9966	k8
S2C10	Argentina	lowland	D-11889	K6	0	K5	0.9966	k8
S2C10	Argentina	lowland	D-11889	K7	0	K5	0.9966	k8
S2C10	Argentina	lowland	D-11889	K8	0	K5	0.9966	k8
S2C10	Argentina	lowland	D-11889	K9	0.0033	K5	0.9966	k8
S2H3	Chile	lowland	PI-634925	K2	0.0139	K5	0.9845	k8
S2H3	Chile	lowland	PI-634925	K3	0.0001	K5	0.9845	k8
S2H3	Chile	lowland	PI-634925	K4	0	K5	0.9845	k8
S2H3	Chile	lowland	PI-634925	K5	0.9845	K5	0.9845	k8
S2H3	Chile	lowland	PI-634925	K6	0	K5	0.9845	k8
S2H3	Chile	lowland	PI-634925	K7	0	K5	0.9845	k8
S2H3	Chile	lowland	PI-634925	K8	0.0014	K5	0.9845	k8
S2H3	Chile	lowland	PI-634925	K9	0	K5	0.9845	k8
S1C9	Chile	lowland	PI-614885	K2	0	K5	0.9841	k8
S1C9	Chile	lowland	PI-614885	K3	0	K5	0.9841	k8
S1C9	Chile	lowland	PI-614885	K4	0	K5	0.9841	k8
S1C9	Chile	lowland	PI-614885	K5	0.9841	K5	0.9841	k8
S1C9	Chile	lowland	PI-614885	K6	0.0158	K5	0.9841	k8
S1C9	Chile	lowland	PI-614885	K7	0	K5	0.9841	k8
S1C9	Chile	lowland	PI-614885	K8	0	K5	0.9841	k8
S1C9	Chile	lowland	PI-614885	K9	0	K5	0.9841	k8
S4C8	Argentina	lowland	D-12282	K2	0	K5	0.9726	k8
S4C8	Argentina	lowland	D-12282	K3	0	K5	0.9726	k8
S4C8	Argentina	lowland	D-12282	K4	0	K5	0.9726	k8
S4C8	Argentina	lowland	D-12282	K5	0.9726	K5	0.9726	k8
S4C8	Argentina	lowland	D-12282	K6	0.0262	K5	0.9726	k8
S4C8	Argentina	lowland	D-12282	K7	0	K5	0.9726	k8
S4C8	Argentina	lowland	D-12282	K8	0.0011	K5	0.9726	k8
S4C8	Argentina	lowland	D-12282	K9	0	K5	0.9726	k8
S2H11	Chile	lowland	PI-634919	K2	0	K5	0.972	k8
S2H11	Chile	lowland	PI-634919	K3	0	K5	0.972	k8
S2H11	Chile	lowland	PI-634919	K4	0	K5	0.972	k8
S2H11	Chile	lowland	PI-634919	K5	0.972	K5	0.972	k8
S2H11	Chile	lowland	PI-634919	K6	0.0279	K5	0.972	k8
S2H11	Chile	lowland	PI-634919	K7	0	K5	0.972	k8
S2H11	Chile	lowland	PI-634919	K8	0	K5	0.972	k8
S2H11	Chile	lowland	PI-634919	K9	0	K5	0.972	k8
S1B1	Bolivia	lowland	PI-614927	K2	0	K5	0.97	k8
S1B1	Bolivia	lowland	PI-614927	K3	0	K5	0.97	k8
S1B1	Bolivia	lowland	PI-614927	K4	0	K5	0.97	k8
S1B1	Bolivia	lowland	PI-614927	K5	0.97	K5	0.97	k8
S1B1	Bolivia	lowland	PI-614927	K6	0.03	K5	0.97	k8
S1B1	Bolivia	lowland	PI-614927	K7	0	K5	0.97	k8
S1B1	Bolivia	lowland	PI-614927	K8	0	K5	0.97	k8
S1B1	Bolivia	lowland	PI-614927	K9	0	K5	0.97	k8
S2E11	Chile	lowland	BO-42	K2	0	K5	0.9573	k8
S2E11	Chile	lowland	BO-42	K3	0	K5	0.9573	k8
S2E11	Chile	lowland	BO-42	K4	0	K5	0.9573	k8
S2E11	Chile	lowland	BO-42	K5	0.9573	K5	0.9573	k8
S2E11	Chile	lowland	BO-42	K6	0.0105	K5	0.9573	k8
S2E11	Chile	lowland	BO-42	K7	0	K5	0.9573	k8
S2E11	Chile	lowland	BO-42	K8	0.0322	K5	0.9573	k8
S2E11	Chile	lowland	BO-42	K9	0	K5	0.9573	k8
S4H9	Chile	lowland	BO-11	K2	0	K5	0.9503	k8
S4H9	Chile	lowland	BO-11	K3	0	K5	0.9503	k8
S4H9	Chile	lowland	BO-11	K4	0.0011	K5	0.9503	k8
S4H9	Chile	lowland	BO-11	K5	0.9503	K5	0.9503	k8
S4H9	Chile	lowland	BO-11	K6	0.0437	K5	0.9503	k8
S4H9	Chile	lowland	BO-11	K7	0	K5	0.9503	k8
S4H9	Chile	lowland	BO-11	K8	0.0006	K5	0.9503	k8
S4H9	Chile	lowland	BO-11	K9	0.0042	K5	0.9503	k8
S4B8	Chile	lowland	BO-17	K2	0	K5	0.9326	k8
S4B8	Chile	lowland	BO-17	K3	0	K5	0.9326	k8
S4B8	Chile	lowland	BO-17	K4	0	K5	0.9326	k8
S4B8	Chile	lowland	BO-17	K5	0.9326	K5	0.9326	k8
S4B8	Chile	lowland	BO-17	K6	0.0673	K5	0.9326	k8
S4B8	Chile	lowland	BO-17	K7	0	K5	0.9326	k8
S4B8	Chile	lowland	BO-17	K8	0	K5	0.9326	k8
S4B8	Chile	lowland	BO-17	K9	0	K5	0.9326	k8
S3G6	Ecuador	lowland	PI-674266	K2	0	K5	0.895	k8
S3G6	Ecuador	lowland	PI-674266	K3	0	K5	0.895	k8
S3G6	Ecuador	lowland	PI-674266	K4	0	K5	0.895	k8
S3G6	Ecuador	lowland	PI-674266	K5	0.895	K5	0.895	k8
S3G6	Ecuador	lowland	PI-674266	K6	0.1049	K5	0.895	k8
S3G6	Ecuador	lowland	PI-674266	K7	0	K5	0.895	k8
S3G6	Ecuador	lowland	PI-674266	K8	0	K5	0.895	k8
S3G6	Ecuador	lowland	PI-674266	K9	0	K5	0.895	k8
S1D3	Unknown	lowland	E-DK-4	K2	0	K5	0.8942	k8
S1D3	Unknown	lowland	E-DK-4	K3	0	K5	0.8942	k8
S1D3	Unknown	lowland	E-DK-4	K4	0	K5	0.8942	k8
S1D3	Unknown	lowland	E-DK-4	K5	0.8942	K5	0.8942	k8
S1D3	Unknown	lowland	E-DK-4	K6	0.1057	K5	0.8942	k8
S1D3	Unknown	lowland	E-DK-4	K7	0	K5	0.8942	k8
S1D3	Unknown	lowland	E-DK-4	K8	0	K5	0.8942	k8
S1D3	Unknown	lowland	E-DK-4	K9	0	K5	0.8942	k8
S3A7	Peru	lowland	D-12177	K2	0	K5	0.8928	k8
S3A7	Peru	lowland	D-12177	K3	0	K5	0.8928	k8
S3A7	Peru	lowland	D-12177	K4	0	K5	0.8928	k8
S3A7	Peru	lowland	D-12177	K5	0.8928	K5	0.8928	k8
S3A7	Peru	lowland	D-12177	K6	0.0501	K5	0.8928	k8
S3A7	Peru	lowland	D-12177	K7	0.0571	K5	0.8928	k8
S3A7	Peru	lowland	D-12177	K8	0	K5	0.8928	k8
S3A7	Peru	lowland	D-12177	K9	0	K5	0.8928	k8
S1H9	Chile	lowland	PI-634924	K2	0	K5	0.8809	k8
S1H9	Chile	lowland	PI-634924	K3	0	K5	0.8809	k8
S1H9	Chile	lowland	PI-634924	K4	0	K5	0.8809	k8
S1H9	Chile	lowland	PI-634924	K5	0.8809	K5	0.8809	k8
S1H9	Chile	lowland	PI-634924	K6	0.1191	K5	0.8809	k8
S1H9	Chile	lowland	PI-634924	K7	0	K5	0.8809	k8
S1H9	Chile	lowland	PI-634924	K8	0	K5	0.8809	k8
S1H9	Chile	lowland	PI-634924	K9	0	K5	0.8809	k8
10191	Unknown	lowland	Ames	K2	0	K5	0.8757	k8
10191	Unknown	lowland	Ames	K3	0	K5	0.8757	k8
10191	Unknown	lowland	Ames	K4	0	K5	0.8757	k8
10191	Unknown	lowland	Ames	K5	0.8757	K5	0.8757	k8
10191	Unknown	lowland	Ames	K6	0.1242	K5	0.8757	k8
10191	Unknown	lowland	Ames	K7	0	K5	0.8757	k8
10191	Unknown	lowland	Ames	K8	0	K5	0.8757	k8
10191	Unknown	lowland	Ames	K9	0	K5	0.8757	k8
S2G6	United States	lowland	Ames-13761	K2	0	K5	0.8064	k8
S2G6	United States	lowland	Ames-13761	K3	0	K5	0.8064	k8
S2G6	United States	lowland	Ames-13761	K4	0	K5	0.8064	k8
S2G6	United States	lowland	Ames-13761	K5	0.8064	K5	0.8064	k8
S2G6	United States	lowland	Ames-13761	K6	0.0796	K5	0.8064	k8
S2G6	United States	lowland	Ames-13761	K7	0.1139	K5	0.8064	k8
S2G6	United States	lowland	Ames-13761	K8	0	K5	0.8064	k8
S2G6	United States	lowland	Ames-13761	K9	0	K5	0.8064	k8
S4D9	Chile	lowland	PI-614882	K2	0	K5	0.8056	k8
S4D9	Chile	lowland	PI-614882	K3	0.0053	K5	0.8056	k8
S4D9	Chile	lowland	PI-614882	K4	0	K5	0.8056	k8
S4D9	Chile	lowland	PI-614882	K5	0.8056	K5	0.8056	k8
S4D9	Chile	lowland	PI-614882	K6	0.1845	K5	0.8056	k8
S4D9	Chile	lowland	PI-614882	K7	0	K5	0.8056	k8
S4D9	Chile	lowland	PI-614882	K8	0.0002	K5	0.8056	k8
S4D9	Chile	lowland	PI-614882	K9	0.0044	K5	0.8056	k8
S1D5	United Kingdom	lowland	RU-5	K2	0	K5	0.8054	k8
S1D5	United Kingdom	lowland	RU-5	K3	0	K5	0.8054	k8
S1D5	United Kingdom	lowland	RU-5	K4	0	K5	0.8054	k8
S1D5	United Kingdom	lowland	RU-5	K5	0.8054	K5	0.8054	k8
S1D5	United Kingdom	lowland	RU-5	K6	0.1945	K5	0.8054	k8
S1D5	United Kingdom	lowland	RU-5	K7	0	K5	0.8054	k8
S1D5	United Kingdom	lowland	RU-5	K8	0	K5	0.8054	k8
S1D5	United Kingdom	lowland	RU-5	K9	0	K5	0.8054	k8
S2A7	United States	lowland	Ames-13758	K2	0	K5	0.8013	k8
S2A7	United States	lowland	Ames-13758	K3	0.0059	K5	0.8013	k8
S2A7	United States	lowland	Ames-13758	K4	0.0103	K5	0.8013	k8
S2A7	United States	lowland	Ames-13758	K5	0.8013	K5	0.8013	k8
S2A7	United States	lowland	Ames-13758	K6	0	K5	0.8013	k8
S2A7	United States	lowland	Ames-13758	K7	0.092	K5	0.8013	k8
S2A7	United States	lowland	Ames-13758	K8	0.003	K5	0.8013	k8
S2A7	United States	lowland	Ames-13758	K9	0.0874	K5	0.8013	k8
S1B8	Chile	lowland	Ames-13743	K2	0	K5	0.7988	k8
S1B8	Chile	lowland	Ames-13743	K3	0	K5	0.7988	k8
S1B8	Chile	lowland	Ames-13743	K4	0	K5	0.7988	k8
S1B8	Chile	lowland	Ames-13743	K5	0.7988	K5	0.7988	k8
S1B8	Chile	lowland	Ames-13743	K6	0.0703	K5	0.7988	k8
S1B8	Chile	lowland	Ames-13743	K7	0.1309	K5	0.7988	k8
S1B8	Chile	lowland	Ames-13743	K8	0	K5	0.7988	k8
S1B8	Chile	lowland	Ames-13743	K9	0	K5	0.7988	k8
S1F6	United States	lowland	Ames-13721	K2	0	K5	0.7952	k8
S1F6	United States	lowland	Ames-13721	K3	0.0135	K5	0.7952	k8
S1F6	United States	lowland	Ames-13721	K4	0	K5	0.7952	k8
S1F6	United States	lowland	Ames-13721	K5	0.7952	K5	0.7952	k8
S1F6	United States	lowland	Ames-13721	K6	0.0441	K5	0.7952	k8
S1F6	United States	lowland	Ames-13721	K7	0.0503	K5	0.7952	k8
S1F6	United States	lowland	Ames-13721	K8	0.0807	K5	0.7952	k8
S1F6	United States	lowland	Ames-13721	K9	0.0163	K5	0.7952	k8
S1D10	Chile	lowland	BO-13	K2	0	K5	0.7882	k8
S1D10	Chile	lowland	BO-13	K3	0	K5	0.7882	k8
S1D10	Chile	lowland	BO-13	K4	0	K5	0.7882	k8
S1D10	Chile	lowland	BO-13	K5	0.7882	K5	0.7882	k8
S1D10	Chile	lowland	BO-13	K6	0.2118	K5	0.7882	k8
S1D10	Chile	lowland	BO-13	K7	0	K5	0.7882	k8
S1D10	Chile	lowland	BO-13	K8	0	K5	0.7882	k8
S1D10	Chile	lowland	BO-13	K9	0	K5	0.7882	k8
S1B3	United States	lowland	Ames-13734	K2	0	K5	0.7511	k8
S1B3	United States	lowland	Ames-13734	K3	0	K5	0.7511	k8
S1B3	United States	lowland	Ames-13734	K4	0	K5	0.7511	k8
S1B3	United States	lowland	Ames-13734	K5	0.7511	K5	0.7511	k8
S1B3	United States	lowland	Ames-13734	K6	0	K5	0.7511	k8
S1B3	United States	lowland	Ames-13734	K7	0.2488	K5	0.7511	k8
S1B3	United States	lowland	Ames-13734	K8	0	K5	0.7511	k8
S1B3	United States	lowland	Ames-13734	K9	0	K5	0.7511	k8
S4B6	Denmark	lowland	S4B6	K2	0	K5	0.733	k8
S4B6	Denmark	lowland	S4B6	K3	0	K5	0.733	k8
S4B6	Denmark	lowland	S4B6	K4	0	K5	0.733	k8
S4B6	Denmark	lowland	S4B6	K5	0.733	K5	0.733	k8
S4B6	Denmark	lowland	S4B6	K6	0.267	K5	0.733	k8
S4B6	Denmark	lowland	S4B6	K7	0	K5	0.733	k8
S4B6	Denmark	lowland	S4B6	K8	0	K5	0.733	k8
S4B6	Denmark	lowland	S4B6	K9	0	K5	0.733	k8
S3E4	Bolivia	lowland	CHEN-140	K2	0	K5	0.7037	k8
S3E4	Bolivia	lowland	CHEN-140	K3	0	K5	0.7037	k8
S3E4	Bolivia	lowland	CHEN-140	K4	0	K5	0.7037	k8
S3E4	Bolivia	lowland	CHEN-140	K5	0.7037	K5	0.7037	k8
S3E4	Bolivia	lowland	CHEN-140	K6	0.2962	K5	0.7037	k8
S3E4	Bolivia	lowland	CHEN-140	K7	0	K5	0.7037	k8
S3E4	Bolivia	lowland	CHEN-140	K8	0	K5	0.7037	k8
S3E4	Bolivia	lowland	CHEN-140	K9	0	K5	0.7037	k8
S2E6	United States	lowland	Ames-13740	K2	0	K5	0.6963	k8
S2E6	United States	lowland	Ames-13740	K3	0	K5	0.6963	k8
S2E6	United States	lowland	Ames-13740	K4	0	K5	0.6963	k8
S2E6	United States	lowland	Ames-13740	K5	0.6963	K5	0.6963	k8
S2E6	United States	lowland	Ames-13740	K6	0	K5	0.6963	k8
S2E6	United States	lowland	Ames-13740	K7	0.3036	K5	0.6963	k8
S2E6	United States	lowland	Ames-13740	K8	0	K5	0.6963	k8
S2E6	United States	lowland	Ames-13740	K9	0	K5	0.6963	k8
S3D5	United States	lowland	Ames-13757	K2	0	K5	0.695	k8
S3D5	United States	lowland	Ames-13757	K3	0	K5	0.695	k8
S3D5	United States	lowland	Ames-13757	K4	0	K5	0.695	k8
S3D5	United States	lowland	Ames-13757	K5	0.695	K5	0.695	k8
S3D5	United States	lowland	Ames-13757	K6	0.3049	K5	0.695	k8
S3D5	United States	lowland	Ames-13757	K7	0	K5	0.695	k8
S3D5	United States	lowland	Ames-13757	K8	0	K5	0.695	k8
S3D5	United States	lowland	Ames-13757	K9	0	K5	0.695	k8
10190	Unknown	lowland	Ku-2-Q5	K2	0	K5	0.6934	k8
10190	Unknown	lowland	Ku-2-Q5	K3	0	K5	0.6934	k8
10190	Unknown	lowland	Ku-2-Q5	K4	0	K5	0.6934	k8
10190	Unknown	lowland	Ku-2-Q5	K5	0.6934	K5	0.6934	k8
10190	Unknown	lowland	Ku-2-Q5	K6	0.3065	K5	0.6934	k8
10190	Unknown	lowland	Ku-2-Q5	K7	0	K5	0.6934	k8
10190	Unknown	lowland	Ku-2-Q5	K8	0	K5	0.6934	k8
10190	Unknown	lowland	Ku-2-Q5	K9	0	K5	0.6934	k8
S4F8	United States	lowland	Ames-13742	K2	0	K5	0.6868	k8
S4F8	United States	lowland	Ames-13742	K3	0	K5	0.6868	k8
S4F8	United States	lowland	Ames-13742	K4	0	K5	0.6868	k8
S4F8	United States	lowland	Ames-13742	K5	0.6868	K5	0.6868	k8
S4F8	United States	lowland	Ames-13742	K6	0	K5	0.6868	k8
S4F8	United States	lowland	Ames-13742	K7	0.3131	K5	0.6868	k8
S4F8	United States	lowland	Ames-13742	K8	0	K5	0.6868	k8
S4F8	United States	lowland	Ames-13742	K9	0	K5	0.6868	k8
S1F1	Unknown	lowland	Moroccan Yellow	K2	0	K5	0.6805	k8
S1F1	Unknown	lowland	Moroccan Yellow	K3	0.0246	K5	0.6805	k8
S1F1	Unknown	lowland	Moroccan Yellow	K4	0	K5	0.6805	k8
S1F1	Unknown	lowland	Moroccan Yellow	K5	0.6805	K5	0.6805	k8
S1F1	Unknown	lowland	Moroccan Yellow	K6	0.227	K5	0.6805	k8
S1F1	Unknown	lowland	Moroccan Yellow	K7	0.0384	K5	0.6805	k8
S1F1	Unknown	lowland	Moroccan Yellow	K8	0.0014	K5	0.6805	k8
S1F1	Unknown	lowland	Moroccan Yellow	K9	0.0282	K5	0.6805	k8
S1C6	United States	lowland	Ames-13722	K2	0	K5	0.6728	k8
S1C6	United States	lowland	Ames-13722	K3	0	K5	0.6728	k8
S1C6	United States	lowland	Ames-13722	K4	0	K5	0.6728	k8
S1C6	United States	lowland	Ames-13722	K5	0.6728	K5	0.6728	k8
S1C6	United States	lowland	Ames-13722	K6	0	K5	0.6728	k8
S1C6	United States	lowland	Ames-13722	K7	0.3271	K5	0.6728	k8
S1C6	United States	lowland	Ames-13722	K8	0	K5	0.6728	k8
S1C6	United States	lowland	Ames-13722	K9	0	K5	0.6728	k8
S1G6	United States	lowland	Ames-13753	K2	0	K5	0.6659	k8
S1G6	United States	lowland	Ames-13753	K3	0	K5	0.6659	k8
S1G6	United States	lowland	Ames-13753	K4	0	K5	0.6659	k8
S1G6	United States	lowland	Ames-13753	K5	0.6659	K5	0.6659	k8
S1G6	United States	lowland	Ames-13753	K6	0	K5	0.6659	k8
S1G6	United States	lowland	Ames-13753	K7	0.3341	K5	0.6659	k8
S1G6	United States	lowland	Ames-13753	K8	0	K5	0.6659	k8
S1G6	United States	lowland	Ames-13753	K9	0	K5	0.6659	k8
S2C6	United States	lowland	Ames-13751	K2	0	K5	0.6604	k8
S2C6	United States	lowland	Ames-13751	K3	0.0415	K5	0.6604	k8
S2C6	United States	lowland	Ames-13751	K4	0	K5	0.6604	k8
S2C6	United States	lowland	Ames-13751	K5	0.6604	K5	0.6604	k8
S2C6	United States	lowland	Ames-13751	K6	0.0783	K5	0.6604	k8
S2C6	United States	lowland	Ames-13751	K7	0.1994	K5	0.6604	k8
S2C6	United States	lowland	Ames-13751	K8	0	K5	0.6604	k8
S2C6	United States	lowland	Ames-13751	K9	0.0205	K5	0.6604	k8
S4D8	United Kingdom	lowland	RU-2	K2	0	K5	0.6574	k8
S4D8	United Kingdom	lowland	RU-2	K3	0	K5	0.6574	k8
S4D8	United Kingdom	lowland	RU-2	K4	0	K5	0.6574	k8
S4D8	United Kingdom	lowland	RU-2	K5	0.6574	K5	0.6574	k8
S4D8	United Kingdom	lowland	RU-2	K6	0.3425	K5	0.6574	k8
S4D8	United Kingdom	lowland	RU-2	K7	0	K5	0.6574	k8
S4D8	United Kingdom	lowland	RU-2	K8	0	K5	0.6574	k8
S4D8	United Kingdom	lowland	RU-2	K9	0	K5	0.6574	k8
S1F7	United States	lowland	Ames-13738	K2	0	K5	0.6415	k8
S1F7	United States	lowland	Ames-13738	K3	0	K5	0.6415	k8
S1F7	United States	lowland	Ames-13738	K4	0	K5	0.6415	k8
S1F7	United States	lowland	Ames-13738	K5	0.6415	K5	0.6415	k8
S1F7	United States	lowland	Ames-13738	K6	0.1464	K5	0.6415	k8
S1F7	United States	lowland	Ames-13738	K7	0.2121	K5	0.6415	k8
S1F7	United States	lowland	Ames-13738	K8	0	K5	0.6415	k8
S1F7	United States	lowland	Ames-13738	K9	0	K5	0.6415	k8
S3H4	Peru	lowland	CHEN-391	K2	0	K5	0.6207	k8
S3H4	Peru	lowland	CHEN-391	K3	0.1134	K5	0.6207	k8
S3H4	Peru	lowland	CHEN-391	K4	0.0248	K5	0.6207	k8
S3H4	Peru	lowland	CHEN-391	K5	0.6207	K5	0.6207	k8
S3H4	Peru	lowland	CHEN-391	K6	0	K5	0.6207	k8
S3H4	Peru	lowland	CHEN-391	K7	0.2055	K5	0.6207	k8
S3H4	Peru	lowland	CHEN-391	K8	0.0357	K5	0.6207	k8
S3H4	Peru	lowland	CHEN-391	K9	0	K5	0.6207	k8
S1G9	United States	lowland	Ames-13727	K2	0	K5	0.6183	k8
S1G9	United States	lowland	Ames-13727	K3	0	K5	0.6183	k8
S1G9	United States	lowland	Ames-13727	K4	0.0227	K5	0.6183	k8
S1G9	United States	lowland	Ames-13727	K5	0.6183	K5	0.6183	k8
S1G9	United States	lowland	Ames-13727	K6	0	K5	0.6183	k8
S1G9	United States	lowland	Ames-13727	K7	0.359	K5	0.6183	k8
S1G9	United States	lowland	Ames-13727	K8	0	K5	0.6183	k8
S1G9	United States	lowland	Ames-13727	K9	0	K5	0.6183	k8
S1B6	United States	lowland	Ames-13735	K2	0	K5	0.6167	k8
S1B6	United States	lowland	Ames-13735	K3	0	K5	0.6167	k8
S1B6	United States	lowland	Ames-13735	K4	0	K5	0.6167	k8
S1B6	United States	lowland	Ames-13735	K5	0.6167	K5	0.6167	k8
S1B6	United States	lowland	Ames-13735	K6	0	K5	0.6167	k8
S1B6	United States	lowland	Ames-13735	K7	0.3833	K5	0.6167	k8
S1B6	United States	lowland	Ames-13735	K8	0	K5	0.6167	k8
S1B6	United States	lowland	Ames-13735	K9	0	K5	0.6167	k8
S2G2	Chile	lowland	BO-03	K2	0	K5	0.6166	k8
S2G2	Chile	lowland	BO-03	K3	0	K5	0.6166	k8
S2G2	Chile	lowland	BO-03	K4	0	K5	0.6166	k8
S2G2	Chile	lowland	BO-03	K5	0.6166	K5	0.6166	k8
S2G2	Chile	lowland	BO-03	K6	0.3834	K5	0.6166	k8
S2G2	Chile	lowland	BO-03	K7	0	K5	0.6166	k8
S2G2	Chile	lowland	BO-03	K8	0	K5	0.6166	k8
S2G2	Chile	lowland	BO-03	K9	0	K5	0.6166	k8
S1C8	United States	lowland	Ames-13730	K2	0	K5	0.6019	k8
S1C8	United States	lowland	Ames-13730	K3	0	K5	0.6019	k8
S1C8	United States	lowland	Ames-13730	K4	0	K5	0.6019	k8
S1C8	United States	lowland	Ames-13730	K5	0.6019	K5	0.6019	k8
S1C8	United States	lowland	Ames-13730	K6	0	K5	0.6019	k8
S1C8	United States	lowland	Ames-13730	K7	0.398	K5	0.6019	k8
S1C8	United States	lowland	Ames-13730	K8	0	K5	0.6019	k8
S1C8	United States	lowland	Ames-13730	K9	0	K5	0.6019	k8
S2F11	Chile	lowland	BO-63	K2	0	K5	0.579	k8
S2F11	Chile	lowland	BO-63	K3	0	K5	0.579	k8
S2F11	Chile	lowland	BO-63	K4	0	K5	0.579	k8
S2F11	Chile	lowland	BO-63	K5	0.579	K5	0.579	k8
S2F11	Chile	lowland	BO-63	K6	0.4209	K5	0.579	k8
S2F11	Chile	lowland	BO-63	K7	0	K5	0.579	k8
S2F11	Chile	lowland	BO-63	K8	0	K5	0.579	k8
S2F11	Chile	lowland	BO-63	K9	0	K5	0.579	k8
S2D4	United States	lowland	Ames-13750	K2	0	K5	0.5382	k8
S2D4	United States	lowland	Ames-13750	K3	0	K5	0.5382	k8
S2D4	United States	lowland	Ames-13750	K4	0	K5	0.5382	k8
S2D4	United States	lowland	Ames-13750	K5	0.5382	K5	0.5382	k8
S2D4	United States	lowland	Ames-13750	K6	0.0352	K5	0.5382	k8
S2D4	United States	lowland	Ames-13750	K7	0.3531	K5	0.5382	k8
S2D4	United States	lowland	Ames-13750	K8	0.0734	K5	0.5382	k8
S2D4	United States	lowland	Ames-13750	K9	0	K5	0.5382	k8
S1A8	Chile	lowland	BO-58	K2	0	K5	0.534	k8
S1A8	Chile	lowland	BO-58	K3	0.0043	K5	0.534	k8
S1A8	Chile	lowland	BO-58	K4	0	K5	0.534	k8
S1A8	Chile	lowland	BO-58	K5	0.534	K5	0.534	k8
S1A8	Chile	lowland	BO-58	K6	0.3166	K5	0.534	k8
S1A8	Chile	lowland	BO-58	K7	0.144	K5	0.534	k8
S1A8	Chile	lowland	BO-58	K8	0	K5	0.534	k8
S1A8	Chile	lowland	BO-58	K9	0.001	K5	0.534	k8
S1H7	United States	lowland	Ames-13749	K2	0	K5	0.5175	k8
S1H7	United States	lowland	Ames-13749	K3	0	K5	0.5175	k8
S1H7	United States	lowland	Ames-13749	K4	0	K5	0.5175	k8
S1H7	United States	lowland	Ames-13749	K5	0.5175	K5	0.5175	k8
S1H7	United States	lowland	Ames-13749	K6	0	K5	0.5175	k8
S1H7	United States	lowland	Ames-13749	K7	0.4825	K5	0.5175	k8
S1H7	United States	lowland	Ames-13749	K8	0	K5	0.5175	k8
S1H7	United States	lowland	Ames-13749	K9	0	K5	0.5175	k8
S2E4	United States	lowland	Ames-13755	K2	0	K5	0.5172	k8
S2E4	United States	lowland	Ames-13755	K3	0	K5	0.5172	k8
S2E4	United States	lowland	Ames-13755	K4	0	K5	0.5172	k8
S2E4	United States	lowland	Ames-13755	K5	0.5172	K5	0.5172	k8
S2E4	United States	lowland	Ames-13755	K6	0	K5	0.5172	k8
S2E4	United States	lowland	Ames-13755	K7	0.0068	K5	0.5172	k8
S2E4	United States	lowland	Ames-13755	K8	0.476	K5	0.5172	k8
S2E4	United States	lowland	Ames-13755	K9	0	K5	0.5172	k8
S3G4	Peru	lowland	PI-510545	K2	0	K5	0.5096	k8
S3G4	Peru	lowland	PI-510545	K3	0	K5	0.5096	k8
S3G4	Peru	lowland	PI-510545	K4	0	K5	0.5096	k8
S3G4	Peru	lowland	PI-510545	K5	0.5096	K5	0.5096	k8
S3G4	Peru	lowland	PI-510545	K6	0.4903	K5	0.5096	k8
S3G4	Peru	lowland	PI-510545	K7	0	K5	0.5096	k8
S3G4	Peru	lowland	PI-510545	K8	0	K5	0.5096	k8
S3G4	Peru	lowland	PI-510545	K9	0	K5	0.5096	k8
S2G10	Chile	lowland	BO-51	K2	0.0084	K5	0.4977	k8
S2G10	Chile	lowland	BO-51	K3	0	K5	0.4977	k8
S2G10	Chile	lowland	BO-51	K4	0	K5	0.4977	k8
S2G10	Chile	lowland	BO-51	K5	0.4977	K5	0.4977	k8
S2G10	Chile	lowland	BO-51	K6	0.4938	K5	0.4977	k8
S2G10	Chile	lowland	BO-51	K7	0	K5	0.4977	k8
S2G10	Chile	lowland	BO-51	K8	0	K5	0.4977	k8
S2G10	Chile	lowland	BO-51	K9	0	K5	0.4977	k8
S2E5	Unknown	lowland	Bouchane-4	K2	0	K5	0.4891	k8
S2E5	Unknown	lowland	Bouchane-4	K3	0	K5	0.4891	k8
S2E5	Unknown	lowland	Bouchane-4	K4	0	K5	0.4891	k8
S2E5	Unknown	lowland	Bouchane-4	K5	0.4891	K5	0.4891	k8
S2E5	Unknown	lowland	Bouchane-4	K6	0.3954	K5	0.4891	k8
S2E5	Unknown	lowland	Bouchane-4	K7	0.1154	K5	0.4891	k8
S2E5	Unknown	lowland	Bouchane-4	K8	0	K5	0.4891	k8
S2E5	Unknown	lowland	Bouchane-4	K9	0	K5	0.4891	k8
S2C3	United States	lowland	Ames-13728	K2	0	K5	0.4886	k8
S2C3	United States	lowland	Ames-13728	K3	0	K5	0.4886	k8
S2C3	United States	lowland	Ames-13728	K4	0	K5	0.4886	k8
S2C3	United States	lowland	Ames-13728	K5	0.4886	K5	0.4886	k8
S2C3	United States	lowland	Ames-13728	K6	0	K5	0.4886	k8
S2C3	United States	lowland	Ames-13728	K7	0.3769	K5	0.4886	k8
S2C3	United States	lowland	Ames-13728	K8	0.0251	K5	0.4886	k8
S2C3	United States	lowland	Ames-13728	K9	0.1094	K5	0.4886	k8
S1E9	Denmark	lowland	Vikinga	K2	0	K5	0.4441	k8
S1E9	Denmark	lowland	Vikinga	K3	0.0771	K5	0.4441	k8
S1E9	Denmark	lowland	Vikinga	K4	0.0346	K5	0.4441	k8
S1E9	Denmark	lowland	Vikinga	K5	0.4441	K5	0.4441	k8
S1E9	Denmark	lowland	Vikinga	K6	0.3467	K5	0.4441	k8
S1E9	Denmark	lowland	Vikinga	K7	0.0458	K5	0.4441	k8
S1E9	Denmark	lowland	Vikinga	K8	0	K5	0.4441	k8
S1E9	Denmark	lowland	Vikinga	K9	0.0517	K5	0.4441	k8
S3B1	Peru	lowland	D-12123	K2	0	K5	0.4308	k8
S3B1	Peru	lowland	D-12123	K3	0.0043	K5	0.4308	k8
S3B1	Peru	lowland	D-12123	K4	0	K5	0.4308	k8
S3B1	Peru	lowland	D-12123	K5	0.4308	K5	0.4308	k8
S3B1	Peru	lowland	D-12123	K6	0.0467	K5	0.4308	k8
S3B1	Peru	lowland	D-12123	K7	0.1833	K5	0.4308	k8
S3B1	Peru	lowland	D-12123	K8	0	K5	0.4308	k8
S3B1	Peru	lowland	D-12123	K9	0.3349	K5	0.4308	k8
S3C1	Switzerland	lowland	CHEN-7	K2	0	K5	0.4214	k8
S3C1	Switzerland	lowland	CHEN-7	K3	0.0516	K5	0.4214	k8
S3C1	Switzerland	lowland	CHEN-7	K4	0.1329	K5	0.4214	k8
S3C1	Switzerland	lowland	CHEN-7	K5	0.4214	K5	0.4214	k8
S3C1	Switzerland	lowland	CHEN-7	K6	0.191	K5	0.4214	k8
S3C1	Switzerland	lowland	CHEN-7	K7	0.203	K5	0.4214	k8
S3C1	Switzerland	lowland	CHEN-7	K8	0	K5	0.4214	k8
S3C1	Switzerland	lowland	CHEN-7	K9	0	K5	0.4214	k8
S1G10	United States	lowland	Ames-13760	K2	0	K5	0.4124	k8
S1G10	United States	lowland	Ames-13760	K3	0.2525	K5	0.4124	k8
S1G10	United States	lowland	Ames-13760	K4	0.029	K5	0.4124	k8
S1G10	United States	lowland	Ames-13760	K5	0.4124	K5	0.4124	k8
S1G10	United States	lowland	Ames-13760	K6	0.1507	K5	0.4124	k8
S1G10	United States	lowland	Ames-13760	K7	0.1497	K5	0.4124	k8
S1G10	United States	lowland	Ames-13760	K8	0	K5	0.4124	k8
S1G10	United States	lowland	Ames-13760	K9	0.0057	K5	0.4124	k8
S3E5	Chile	lowland	PI-634918	K2	0	K5	0.3898	k8
S3E5	Chile	lowland	PI-634918	K3	0.2727	K5	0.3898	k8
S3E5	Chile	lowland	PI-634918	K4	0	K5	0.3898	k8
S3E5	Chile	lowland	PI-634918	K5	0.3898	K5	0.3898	k8
S3E5	Chile	lowland	PI-634918	K6	0.085	K5	0.3898	k8
S3E5	Chile	lowland	PI-634918	K7	0.2341	K5	0.3898	k8
S3E5	Chile	lowland	PI-634918	K8	0.0183	K5	0.3898	k8
S3E5	Chile	lowland	PI-634918	K9	0	K5	0.3898	k8
S1D4	Unknown	lowland	CHEN-5	K2	0	K6	0.9999	k8
S1F9	Unknown	lowland	CHEN-33	K2	0	K6	0.9999	k8
S2D5	Argentina	lowland	PI-614883	K2	0	K6	0.9999	k8
S2E1	Unknown	lowland	NSL-86649	K2	0	K6	0.9999	k8
S2F3	Unknown	lowland	CHEN-64	K2	0	K6	0.9999	k8
S2G1	Chile	lowland	PI-614888	K2	0	K6	0.9999	k8
S1D4	Unknown	lowland	CHEN-5	K3	0	K6	0.9999	k8
S1F9	Unknown	lowland	CHEN-33	K3	0	K6	0.9999	k8
S2D5	Argentina	lowland	PI-614883	K3	0	K6	0.9999	k8
S2E1	Unknown	lowland	NSL-86649	K3	0	K6	0.9999	k8
S2F3	Unknown	lowland	CHEN-64	K3	0	K6	0.9999	k8
S2G1	Chile	lowland	PI-614888	K3	0	K6	0.9999	k8
S1D4	Unknown	lowland	CHEN-5	K4	0	K6	0.9999	k8
S1F9	Unknown	lowland	CHEN-33	K4	0	K6	0.9999	k8
S2D5	Argentina	lowland	PI-614883	K4	0	K6	0.9999	k8
S2E1	Unknown	lowland	NSL-86649	K4	0	K6	0.9999	k8
S2F3	Unknown	lowland	CHEN-64	K4	0	K6	0.9999	k8
S2G1	Chile	lowland	PI-614888	K4	0	K6	0.9999	k8
S1D4	Unknown	lowland	CHEN-5	K5	0	K6	0.9999	k8
S1F9	Unknown	lowland	CHEN-33	K5	0	K6	0.9999	k8
S2D5	Argentina	lowland	PI-614883	K5	0	K6	0.9999	k8
S2E1	Unknown	lowland	NSL-86649	K5	0	K6	0.9999	k8
S2F3	Unknown	lowland	CHEN-64	K5	0	K6	0.9999	k8
S2G1	Chile	lowland	PI-614888	K5	0	K6	0.9999	k8
S1D4	Unknown	lowland	CHEN-5	K6	0.9999	K6	0.9999	k8
S1F9	Unknown	lowland	CHEN-33	K6	0.9999	K6	0.9999	k8
S2D5	Argentina	lowland	PI-614883	K6	0.9999	K6	0.9999	k8
S2E1	Unknown	lowland	NSL-86649	K6	0.9999	K6	0.9999	k8
S2F3	Unknown	lowland	CHEN-64	K6	0.9999	K6	0.9999	k8
S2G1	Chile	lowland	PI-614888	K6	0.9999	K6	0.9999	k8
S1D4	Unknown	lowland	CHEN-5	K7	0	K6	0.9999	k8
S1F9	Unknown	lowland	CHEN-33	K7	0	K6	0.9999	k8
S2D5	Argentina	lowland	PI-614883	K7	0	K6	0.9999	k8
S2E1	Unknown	lowland	NSL-86649	K7	0	K6	0.9999	k8
S2F3	Unknown	lowland	CHEN-64	K7	0	K6	0.9999	k8
S2G1	Chile	lowland	PI-614888	K7	0	K6	0.9999	k8
S1D4	Unknown	lowland	CHEN-5	K8	0	K6	0.9999	k8
S1F9	Unknown	lowland	CHEN-33	K8	0	K6	0.9999	k8
S2D5	Argentina	lowland	PI-614883	K8	0	K6	0.9999	k8
S2E1	Unknown	lowland	NSL-86649	K8	0	K6	0.9999	k8
S2F3	Unknown	lowland	CHEN-64	K8	0	K6	0.9999	k8
S2G1	Chile	lowland	PI-614888	K8	0	K6	0.9999	k8
S1D4	Unknown	lowland	CHEN-5	K9	0	K6	0.9999	k8
S1F9	Unknown	lowland	CHEN-33	K9	0	K6	0.9999	k8
S2D5	Argentina	lowland	PI-614883	K9	0	K6	0.9999	k8
S2E1	Unknown	lowland	NSL-86649	K9	0	K6	0.9999	k8
S2F3	Unknown	lowland	CHEN-64	K9	0	K6	0.9999	k8
S2G1	Chile	lowland	PI-614888	K9	0	K6	0.9999	k8
S2B1	Chile	lowland	PI-614880	K2	0	K6	0.8301	k8
S2B1	Chile	lowland	PI-614880	K3	0	K6	0.8301	k8
S2B1	Chile	lowland	PI-614880	K4	0	K6	0.8301	k8
S2B1	Chile	lowland	PI-614880	K5	0.1699	K6	0.8301	k8
S2B1	Chile	lowland	PI-614880	K6	0.8301	K6	0.8301	k8
S2B1	Chile	lowland	PI-614880	K7	0	K6	0.8301	k8
S2B1	Chile	lowland	PI-614880	K8	0	K6	0.8301	k8
S2B1	Chile	lowland	PI-614880	K9	0	K6	0.8301	k8
S1G3	Unknown	lowland	Baer-II	K2	0	K6	0.8181	k8
S1G3	Unknown	lowland	Baer-II	K3	0	K6	0.8181	k8
S1G3	Unknown	lowland	Baer-II	K4	0	K6	0.8181	k8
S1G3	Unknown	lowland	Baer-II	K5	0.1818	K6	0.8181	k8
S1G3	Unknown	lowland	Baer-II	K6	0.8181	K6	0.8181	k8
S1G3	Unknown	lowland	Baer-II	K7	0	K6	0.8181	k8
S1G3	Unknown	lowland	Baer-II	K8	0	K6	0.8181	k8
S1G3	Unknown	lowland	Baer-II	K9	0	K6	0.8181	k8
S2B2	Chile	lowland	BO-32	K2	0	K6	0.6162	k8
S2B2	Chile	lowland	BO-32	K3	0	K6	0.6162	k8
S2B2	Chile	lowland	BO-32	K4	0	K6	0.6162	k8
S2B2	Chile	lowland	BO-32	K5	0.3838	K6	0.6162	k8
S2B2	Chile	lowland	BO-32	K6	0.6162	K6	0.6162	k8
S2B2	Chile	lowland	BO-32	K7	0	K6	0.6162	k8
S2B2	Chile	lowland	BO-32	K8	0	K6	0.6162	k8
S2B2	Chile	lowland	BO-32	K9	0	K6	0.6162	k8
S4A7	Unknown	lowland	EMBRAPA-Brazil	K2	0	K6	0.5561	k8
S4A7	Unknown	lowland	EMBRAPA-Brazil	K3	0	K6	0.5561	k8
S4A7	Unknown	lowland	EMBRAPA-Brazil	K4	0	K6	0.5561	k8
S4A7	Unknown	lowland	EMBRAPA-Brazil	K5	0.3974	K6	0.5561	k8
S4A7	Unknown	lowland	EMBRAPA-Brazil	K6	0.5561	K6	0.5561	k8
S4A7	Unknown	lowland	EMBRAPA-Brazil	K7	0	K6	0.5561	k8
S4A7	Unknown	lowland	EMBRAPA-Brazil	K8	0	K6	0.5561	k8
S4A7	Unknown	lowland	EMBRAPA-Brazil	K9	0.0464	K6	0.5561	k8
S3E6	Peru	lowland	D-11985	K2	0	K6	0.5528	k8
S3E6	Peru	lowland	D-11985	K3	0	K6	0.5528	k8
S3E6	Peru	lowland	D-11985	K4	0	K6	0.5528	k8
S3E6	Peru	lowland	D-11985	K5	0.4471	K6	0.5528	k8
S3E6	Peru	lowland	D-11985	K6	0.5528	K6	0.5528	k8
S3E6	Peru	lowland	D-11985	K7	0	K6	0.5528	k8
S3E6	Peru	lowland	D-11985	K8	0	K6	0.5528	k8
S3E6	Peru	lowland	D-11985	K9	0	K6	0.5528	k8
S2F5	Chile	lowland	BO-30	K2	0	K6	0.5501	k8
S2F5	Chile	lowland	BO-30	K3	0	K6	0.5501	k8
S2F5	Chile	lowland	BO-30	K4	0	K6	0.5501	k8
S2F5	Chile	lowland	BO-30	K5	0.4498	K6	0.5501	k8
S2F5	Chile	lowland	BO-30	K6	0.5501	K6	0.5501	k8
S2F5	Chile	lowland	BO-30	K7	0	K6	0.5501	k8
S2F5	Chile	lowland	BO-30	K8	0	K6	0.5501	k8
S2F5	Chile	lowland	BO-30	K9	0	K6	0.5501	k8
S1A9	Chile	lowland	BO-16	K2	0	K6	0.5137	k8
S1A9	Chile	lowland	BO-16	K3	0	K6	0.5137	k8
S1A9	Chile	lowland	BO-16	K4	0	K6	0.5137	k8
S1A9	Chile	lowland	BO-16	K5	0.4862	K6	0.5137	k8
S1A9	Chile	lowland	BO-16	K6	0.5137	K6	0.5137	k8
S1A9	Chile	lowland	BO-16	K7	0	K6	0.5137	k8
S1A9	Chile	lowland	BO-16	K8	0	K6	0.5137	k8
S1A9	Chile	lowland	BO-16	K9	0	K6	0.5137	k8
S1E1	Unknown	lowland	Bouchane-3	K2	0	K6	0.4117	k8
S1E1	Unknown	lowland	Bouchane-3	K3	0.0681	K6	0.4117	k8
S1E1	Unknown	lowland	Bouchane-3	K4	0	K6	0.4117	k8
S1E1	Unknown	lowland	Bouchane-3	K5	0.2745	K6	0.4117	k8
S1E1	Unknown	lowland	Bouchane-3	K6	0.4117	K6	0.4117	k8
S1E1	Unknown	lowland	Bouchane-3	K7	0.2398	K6	0.4117	k8
S1E1	Unknown	lowland	Bouchane-3	K8	0	K6	0.4117	k8
S1E1	Unknown	lowland	Bouchane-3	K9	0.0058	K6	0.4117	k8
S3B9	Peru	highland	CHEN-299	K2	0	K7	0.9999	k8
S3B9	Peru	highland	CHEN-299	K3	0	K7	0.9999	k8
S3B9	Peru	highland	CHEN-299	K4	0	K7	0.9999	k8
S3B9	Peru	highland	CHEN-299	K5	0	K7	0.9999	k8
S3B9	Peru	highland	CHEN-299	K6	0	K7	0.9999	k8
S3B9	Peru	highland	CHEN-299	K7	0.9999	K7	0.9999	k8
S3B9	Peru	highland	CHEN-299	K8	0	K7	0.9999	k8
S3B9	Peru	highland	CHEN-299	K9	0	K7	0.9999	k8
S3E11	Peru	highland	D-12363	K2	0	K7	0.9968	k8
S3E11	Peru	highland	D-12363	K3	0.0002	K7	0.9968	k8
S3E11	Peru	highland	D-12363	K4	0	K7	0.9968	k8
S3E11	Peru	highland	D-12363	K5	0	K7	0.9968	k8
S3E11	Peru	highland	D-12363	K6	0	K7	0.9968	k8
S3E11	Peru	highland	D-12363	K7	0.9968	K7	0.9968	k8
S3E11	Peru	highland	D-12363	K8	0	K7	0.9968	k8
S3E11	Peru	highland	D-12363	K9	0.0029	K7	0.9968	k8
S3A9	Peru	highland	D-12060	K2	0	K7	0.9853	k8
S3A9	Peru	highland	D-12060	K3	0.0054	K7	0.9853	k8
S3A9	Peru	highland	D-12060	K4	0	K7	0.9853	k8
S3A9	Peru	highland	D-12060	K5	0	K7	0.9853	k8
S3A9	Peru	highland	D-12060	K6	0	K7	0.9853	k8
S3A9	Peru	highland	D-12060	K7	0.9853	K7	0.9853	k8
S3A9	Peru	highland	D-12060	K8	0	K7	0.9853	k8
S3A9	Peru	highland	D-12060	K9	0.0092	K7	0.9853	k8
S4F9	Bolivia	highland	PI-614920	K2	0	K7	0.9768	k8
S4F9	Bolivia	highland	PI-614920	K3	0	K7	0.9768	k8
S4F9	Bolivia	highland	PI-614920	K4	0	K7	0.9768	k8
S4F9	Bolivia	highland	PI-614920	K5	0	K7	0.9768	k8
S4F9	Bolivia	highland	PI-614920	K6	0	K7	0.9768	k8
S4F9	Bolivia	highland	PI-614920	K7	0.9768	K7	0.9768	k8
S4F9	Bolivia	highland	PI-614920	K8	0	K7	0.9768	k8
S4F9	Bolivia	highland	PI-614920	K9	0.0231	K7	0.9768	k8
S4F1	Bolivia	highland	PI-614919	K2	0	K7	0.9721	k8
S4F1	Bolivia	highland	PI-614919	K3	0	K7	0.9721	k8
S4F1	Bolivia	highland	PI-614919	K4	0	K7	0.9721	k8
S4F1	Bolivia	highland	PI-614919	K5	0	K7	0.9721	k8
S4F1	Bolivia	highland	PI-614919	K6	0	K7	0.9721	k8
S4F1	Bolivia	highland	PI-614919	K7	0.9721	K7	0.9721	k8
S4F1	Bolivia	highland	PI-614919	K8	0	K7	0.9721	k8
S4F1	Bolivia	highland	PI-614919	K9	0.0278	K7	0.9721	k8
S4D5	Bolivia	highland	PI-614915	K2	0	K7	0.9704	k8
[truncated: 1,103 more rows]
