# Supplementary material for: Genome-wide association study in quinoa reveals selection pattern typical for crops with a short breeding history
Source: eLife. 2022 Jul 8;11:e66873. doi: 10.7554/eLife.66873 (PMC9388097; doi:10.7554/eLife.66873)
Supplement: Figure 2—source data 1. [file elife-66873-fig2-data1.xlsx]

## Sheet: Sheet1
Fig. 2-Source data 2
Fig. 2: Maximum likelihood tree of 303 quinoa and seven wild Chenopodium accessions from the diversity panel. This is a tree file and this can be visualize by any phylogenetic tree visualization softwares.
(((((((((((((((((((((((((10176_10176:0.0543496602,(((((S2A1_S2A1:0.0088813533,S3C5_S3C5:0.0084444246)100:0.0058740546,S4B2_S4B2:0.0140182293)100:0.0100990411,(S3F2_S3F2:0.0142540125,((S4B4_S4B4:0.0319771804,S4H1_S4H1:0.0465916032)78:0.0086244552,(S4D4_S4D4:0.0131677364,(S4G3_S4G3:0.0176916871,S4H2_S4H2:0.0139119779)52:0.0047439021)52:0.0032373955)80:0.0066216531)80:0.0079024082)100:0.0087233912,(…
