# Supplementary material for: Genome-wide association study in quinoa reveals selection pattern typical for crops with a short breeding history
Source: eLife. 2022 Jul 8;11:e66873. doi: 10.7554/eLife.66873 (PMC9388097; doi:10.7554/eLife.66873)
Supplement: Figure 3—source data 1. [file elife-66873-fig3-data1.xlsx]

## Sheet: Sheet1
Fig. 3a-Source data 3a
Fig. 3: Genomic regions associated with important agronomic traits (a) Significant marker-trait associations for days to flowering, days to maturity, plant height, and panicle density on chromosome Cq2A.
Marker	Chr	Pos	p	Trait
2.77014	2	3869	0.806783	DTF
2.82986	2	3955	0.364396	DTF
2.91528	2	4078	0.703385	DTF
3.51042	2	4935	0.173723	DTF
3.68056	2	5180	0.848925	DTF
3.69375	2	5199	0.563835	DTF
3.74514	2	5273	0.605168	DTF
3.75556	2	5288	0.231937	DTF
3.77431	2	5315	0.148463	DTF
3.78819	2	5335	0.140219	DTF
3.87639	2	5462	0.736952	DTF
3.97153	2	5599	0.865656	DTF
02:17792	2	17792	0.627408	DTF
02:17866	2	17866	0.977686	DTF
02:18153	2	18153	0.0903072	DTF
02:18576	2	18576	0.88554	DTF
02:18908	2	18908	0.891526	DTF
02:19129	2	19129	0.688673	DTF
02:19188	2	19188	0.391519	DTF
02:19259	2	19259	0.359606	DTF
02:19288	2	19288	0.939505	DTF
02:19316	2	19316	0.566577	DTF
02:19362	2	19362	0.958307	DTF
02:19597	2	19597	0.789954	DTF
02:19672	2	19672	0.824971	DTF
02:19706	2	19706	0.479173	DTF
02:19751	2	19751	0.243288	DTF
02:19781	2	19781	0.118599	DTF
02:19870	2	19870	0.603344	DTF
02:20265	2	20265	0.0901528	DTF
02:20416	2	20416	0.833525	DTF
02:20439	2	20439	0.4433	DTF
02:20559	2	20559	0.630668	DTF
02:20632	2	20632	0.164228	DTF
02:20633	2	20633	0.164228	DTF
02:21190	2	21190	0.591422	DTF
02:21233	2	21233	0.855851	DTF
02:21273	2	21273	0.784079	DTF
02:21405	2	21405	0.15273	DTF
02:21621	2	21621	0.585955	DTF
02:21625	2	21625	0.66102	DTF
02:21820	2	21820	0.603595	DTF
02:21944	2	21944	0.940163	DTF
02:22003	2	22003	0.303941	DTF
02:22072	2	22072	0.389753	DTF
02:22303	2	22303	0.245383	DTF
02:22460	2	22460	0.994321	DTF
02:22484	2	22484	0.834129	DTF
02:22486	2	22486	0.834129	DTF
02:22571	2	22571	0.110078	DTF
02:22651	2	22651	0.38198	DTF
02:23155	2	23155	0.613186	DTF
02:23368	2	23368	0.308946	DTF
02:23483	2	23483	0.780331	DTF
02:23523	2	23523	0.453802	DTF
02:23558	2	23558	0.220308	DTF
02:24013	2	24013	0.929383	DTF
02:24031	2	24031	0.665063	DTF
02:24044	2	24044	0.0182826	DTF
02:24244	2	24244	0.585914	DTF
02:24451	2	24451	0.179707	DTF
02:24629	2	24629	0.785659	DTF
02:24873	2	24873	0.524901	DTF
02:24992	2	24992	0.201673	DTF
02:25001	2	25001	0.335963	DTF
02:25106	2	25106	0.43856	DTF
02:25494	2	25494	0.418873	DTF
02:25519	2	25519	0.699999	DTF
02:25925	2	25925	0.055647	DTF
02:26028	2	26028	0.411735	DTF
02:26060	2	26060	0.188953	DTF
02:26118	2	26118	0.587704	DTF
02:26134	2	26134	0.735009	DTF
02:26166	2	26166	0.913304	DTF
02:26167	2	26167	0.831875	DTF
02:26450	2	26450	0.8073	DTF
02:26718	2	26718	0.289914	DTF
02:26839	2	26839	0.740388	DTF
02:26966	2	26966	0.994245	DTF
02:27106	2	27106	0.400221	DTF
02:27289	2	27289	0.339863	DTF
02:27401	2	27401	0.99708	DTF
02:27491	2	27491	0.756596	DTF
02:27614	2	27614	0.93636	DTF
02:27683	2	27683	0.507646	DTF
02:27832	2	27832	0.648699	DTF
02:27838	2	27838	0.43153	DTF
02:27869	2	27869	0.525154	DTF
02:28024	2	28024	0.36539	DTF
02:28025	2	28025	0.115395	DTF
02:28086	2	28086	0.456256	DTF
02:28159	2	28159	0.999512	DTF
02:28426	2	28426	0.710217	DTF
02:28514	2	28514	0.0998606	DTF
02:28516	2	28516	0.534735	DTF
02:28526	2	28526	0.0140188	DTF
02:28544	2	28544	0.564681	DTF
02:28570	2	28570	0.0666293	DTF
02:28615	2	28615	0.419661	DTF
02:28727	2	28727	0.232981	DTF
02:28817	2	28817	0.593342	DTF
02:28862	2	28862	0.548676	DTF
02:28977	2	28977	0.380211	DTF
02:29049	2	29049	0.941717	DTF
02:29072	2	29072	0.715978	DTF
02:29103	2	29103	0.888958	DTF
02:29179	2	29179	0.925205	DTF
02:29237	2	29237	0.983458	DTF
02:29260	2	29260	0.536251	DTF
02:29264	2	29264	0.833294	DTF
02:29325	2	29325	0.721196	DTF
02:29350	2	29350	0.998792	DTF
02:29411	2	29411	0.835758	DTF
02:29462	2	29462	0.730519	DTF
02:29474	2	29474	0.528413	DTF
02:29640	2	29640	0.739992	DTF
02:29801	2	29801	0.914402	DTF
02:29818	2	29818	0.444871	DTF
02:29873	2	29873	0.866361	DTF
02:30005	2	30005	0.126713	DTF
02:30053	2	30053	0.0326014	DTF
02:30162	2	30162	0.265047	DTF
02:30189	2	30189	0.318577	DTF
02:30284	2	30284	0.250659	DTF
02:30361	2	30361	0.92643	DTF
02:30394	2	30394	0.656361	DTF
02:30399	2	30399	0.674279	DTF
02:30599	2	30599	0.388717	DTF
02:30783	2	30783	0.804778	DTF
02:30816	2	30816	0.867422	DTF
02:30856	2	30856	0.43597	DTF
02:31167	2	31167	0.941049	DTF
02:31234	2	31234	0.896446	DTF
02:31309	2	31309	0.570496	DTF
02:31336	2	31336	0.790517	DTF
02:31343	2	31343	0.375511	DTF
02:31354	2	31354	0.573213	DTF
02:31378	2	31378	0.649814	DTF
02:31456	2	31456	0.850968	DTF
02:31563	2	31563	0.194608	DTF
02:31578	2	31578	0.296198	DTF
02:31664	2	31664	0.0233641	DTF
02:32154	2	32154	0.936164	DTF
02:32160	2	32160	0.999648	DTF
02:32273	2	32273	0.341605	DTF
02:32320	2	32320	0.103246	DTF
02:32322	2	32322	0.0586411	DTF
02:32450	2	32450	0.945098	DTF
02:32504	2	32504	0.70497	DTF
02:32507	2	32507	0.16828	DTF
02:32577	2	32577	0.611151	DTF
02:32591	2	32591	0.228079	DTF
02:32696	2	32696	0.342547	DTF
02:32941	2	32941	0.645089	DTF
02:33312	2	33312	0.866074	DTF
02:33382	2	33382	0.325422	DTF
02:33517	2	33517	0.19861	DTF
02:33644	2	33644	0.935309	DTF
02:33676	2	33676	0.0996524	DTF
02:33692	2	33692	0.288665	DTF
02:33693	2	33693	0.288665	DTF
02:33708	2	33708	0.823142	DTF
02:33724	2	33724	0.163876	DTF
02:33943	2	33943	0.852874	DTF
02:33961	2	33961	0.997938	DTF
02:34201	2	34201	0.74172	DTF
02:34234	2	34234	0.956452	DTF
02:34261	2	34261	0.0832284	DTF
02:34345	2	34345	0.328567	DTF
02:34503	2	34503	0.827617	DTF
02:34902	2	34902	0.797859	DTF
02:34940	2	34940	0.798848	DTF
02:35068	2	35068	0.486615	DTF
02:35099	2	35099	0.811866	DTF
02:35212	2	35212	0.914287	DTF
02:35745	2	35745	0.830172	DTF
02:35764	2	35764	0.920965	DTF
02:35810	2	35810	0.321912	DTF
02:35827	2	35827	0.691997	DTF
02:35976	2	35976	0.862732	DTF
02:36024	2	36024	0.406085	DTF
02:36030	2	36030	0.23633	DTF
02:36087	2	36087	0.161888	DTF
02:36191	2	36191	0.614163	DTF
02:36193	2	36193	0.763644	DTF
02:36269	2	36269	0.372277	DTF
02:36409	2	36409	0.178089	DTF
02:36431	2	36431	0.541373	DTF
02:36539	2	36539	0.653886	DTF
02:36540	2	36540	0.653886	DTF
02:36543	2	36543	0.850742	DTF
02:36582	2	36582	0.849366	DTF
02:36630	2	36630	0.918452	DTF
02:36632	2	36632	0.0546534	DTF
02:36707	2	36707	0.369509	DTF
02:36751	2	36751	0.81589	DTF
02:36785	2	36785	0.427821	DTF
02:37294	2	37294	0.434406	DTF
02:37295	2	37295	0.645943	DTF
02:37312	2	37312	0.546711	DTF
02:37524	2	37524	0.78838	DTF
02:37617	2	37617	0.856175	DTF
02:37756	2	37756	0.503716	DTF
02:37792	2	37792	0.730928	DTF
02:37978	2	37978	0.229613	DTF
02:38025	2	38025	0.165744	DTF
02:38127	2	38127	0.439826	DTF
02:38218	2	38218	0.412357	DTF
02:38222	2	38222	0.194724	DTF
02:38230	2	38230	0.717583	DTF
02:38245	2	38245	0.0333369	DTF
02:38452	2	38452	0.0386887	DTF
02:38466	2	38466	0.0735264	DTF
02:38478	2	38478	0.0146442	DTF
02:38488	2	38488	0.0405685	DTF
02:38507	2	38507	0.809557	DTF
02:38544	2	38544	0.0585048	DTF
02:38630	2	38630	0.615092	DTF
02:38649	2	38649	0.693267	DTF
02:38662	2	38662	0.263202	DTF
02:38691	2	38691	0.984461	DTF
02:38709	2	38709	0.875419	DTF
02:38720	2	38720	0.229789	DTF
02:38734	2	38734	0.321248	DTF
02:38766	2	38766	0.933501	DTF
02:38812	2	38812	0.785734	DTF
02:38836	2	38836	0.895531	DTF
02:38858	2	38858	0.119635	DTF
02:38863	2	38863	0.180225	DTF
02:38883	2	38883	0.78707	DTF
02:39062	2	39062	0.542437	DTF
02:39183	2	39183	0.0666586	DTF
02:39301	2	39301	0.0493095	DTF
02:39404	2	39404	0.564029	DTF
02:39427	2	39427	0.766112	DTF
02:39474	2	39474	0.568356	DTF
02:39487	2	39487	0.669582	DTF
02:39503	2	39503	0.743833	DTF
02:39555	2	39555	0.761458	DTF
02:39560	2	39560	0.657465	DTF
02:39610	2	39610	0.309222	DTF
02:39615	2	39615	0.904019	DTF
02:39624	2	39624	0.961862	DTF
02:39632	2	39632	0.967584	DTF
02:39678	2	39678	0.55501	DTF
02:39688	2	39688	0.612829	DTF
02:39874	2	39874	0.170764	DTF
02:39886	2	39886	0.707705	DTF
02:39916	2	39916	0.370658	DTF
02:40000	2	40000	0.812966	DTF
02:40235	2	40235	0.199475	DTF
02:40274	2	40274	0.981935	DTF
02:40359	2	40359	0.710552	DTF
02:40368	2	40368	0.642622	DTF
02:40403	2	40403	0.820491	DTF
02:40510	2	40510	0.980611	DTF
02:40578	2	40578	0.792407	DTF
02:40623	2	40623	0.22218	DTF
02:40627	2	40627	0.890464	DTF
02:40687	2	40687	0.830216	DTF
02:40747	2	40747	0.883312	DTF
02:40748	2	40748	0.883312	DTF
02:40776	2	40776	0.593921	DTF
02:40781	2	40781	0.467743	DTF
02:40815	2	40815	0.970257	DTF
02:40817	2	40817	0.941433	DTF
02:40995	2	40995	0.139883	DTF
02:41152	2	41152	0.718536	DTF
02:41164	2	41164	0.823988	DTF
02:41167	2	41167	0.119074	DTF
02:41170	2	41170	0.94795	DTF
02:41185	2	41185	0.959317	DTF
02:41195	2	41195	0.193273	DTF
02:41303	2	41303	0.586579	DTF
02:41322	2	41322	0.547768	DTF
02:41358	2	41358	0.676682	DTF
02:41369	2	41369	0.403469	DTF
02:41464	2	41464	0.107228	DTF
02:41472	2	41472	0.973414	DTF
02:41473	2	41473	0.979597	DTF
02:41578	2	41578	0.0192052	DTF
02:41597	2	41597	0.190713	DTF
02:41634	2	41634	0.708023	DTF
02:41680	2	41680	0.241575	DTF
02:41746	2	41746	0.688079	DTF
02:41763	2	41763	0.513827	DTF
02:41765	2	41765	0.371993	DTF
02:41774	2	41774	0.286402	DTF
02:41822	2	41822	0.115386	DTF
02:41823	2	41823	0.322942	DTF
02:41829	2	41829	0.314639	DTF
02:41835	2	41835	0.423125	DTF
02:41873	2	41873	0.456142	DTF
02:41974	2	41974	0.857128	DTF
02:41976	2	41976	0.0992179	DTF
02:42016	2	42016	0.710588	DTF
02:42066	2	42066	0.95287	DTF
02:42108	2	42108	0.439935	DTF
02:42115	2	42115	0.0170004	DTF
02:42183	2	42183	0.590681	DTF
02:42208	2	42208	0.880187	DTF
02:42225	2	42225	0.312726	DTF
02:42227	2	42227	0.782603	DTF
02:42238	2	42238	0.717378	DTF
02:42249	2	42249	0.580488	DTF
02:42279	2	42279	0.465522	DTF
02:42280	2	42280	0.483212	DTF
02:42358	2	42358	0.0660419	DTF
02:42360	2	42360	0.708881	DTF
02:42364	2	42364	0.0294878	DTF
02:42367	2	42367	0.32223	DTF
02:42371	2	42371	0.332461	DTF
02:42373	2	42373	0.0977388	DTF
02:42381	2	42381	0.595328	DTF
02:42391	2	42391	0.927376	DTF
02:42487	2	42487	0.966957	DTF
02:42508	2	42508	0.614577	DTF
02:42527	2	42527	0.988357	DTF
02:42633	2	42633	0.436901	DTF
02:42634	2	42634	0.436901	DTF
02:42722	2	42722	0.730817	DTF
02:42749	2	42749	0.724767	DTF
02:42769	2	42769	0.756025	DTF
02:42806	2	42806	0.22479	DTF
02:42839	2	42839	0.224174	DTF
02:42853	2	42853	0.676593	DTF
02:42936	2	42936	0.713072	DTF
02:43008	2	43008	0.198948	DTF
02:43024	2	43024	0.998346	DTF
02:43041	2	43041	0.563943	DTF
02:43047	2	43047	0.545674	DTF
02:43052	2	43052	0.474449	DTF
02:43182	2	43182	0.0970673	DTF
02:43235	2	43235	0.250304	DTF
02:43240	2	43240	0.0076494	DTF
02:43289	2	43289	0.503344	DTF
02:43325	2	43325	0.70338	DTF
02:43345	2	43345	0.621725	DTF
02:43346	2	43346	0.977458	DTF
02:43377	2	43377	0.962141	DTF
02:43428	2	43428	0.143918	DTF
02:43480	2	43480	0.99848	DTF
02:43523	2	43523	0.316038	DTF
02:43530	2	43530	0.619817	DTF
02:43615	2	43615	0.152849	DTF
02:43638	2	43638	0.848315	DTF
02:43655	2	43655	0.431704	DTF
02:43678	2	43678	0.933814	DTF
02:43684	2	43684	0.810401	DTF
02:43688	2	43688	0.394972	DTF
02:43689	2	43689	0.545183	DTF
02:43763	2	43763	0.657753	DTF
02:43776	2	43776	0.309748	DTF
02:43786	2	43786	0.698307	DTF
02:43852	2	43852	0.682329	DTF
02:43910	2	43910	0.623588	DTF
02:43915	2	43915	0.874034	DTF
02:43952	2	43952	0.716877	DTF
02:43954	2	43954	0.768345	DTF
02:43962	2	43962	0.423522	DTF
02:43972	2	43972	0.567828	DTF
02:44029	2	44029	0.430043	DTF
02:44175	2	44175	0.174374	DTF
02:44235	2	44235	0.0314906	DTF
02:44270	2	44270	0.973364	DTF
02:44288	2	44288	0.491106	DTF
02:44357	2	44357	0.66125	DTF
02:44396	2	44396	0.368092	DTF
02:44402	2	44402	0.96195	DTF
02:44469	2	44469	0.613391	DTF
02:44589	2	44589	0.619045	DTF
02:44631	2	44631	0.41974	DTF
02:44768	2	44768	0.896043	DTF
02:45032	2	45032	0.77046	DTF
02:45096	2	45096	0.673986	DTF
02:45194	2	45194	0.338788	DTF
02:45322	2	45322	0.323553	DTF
02:45352	2	45352	0.295721	DTF
02:45364	2	45364	0.499579	DTF
02:45384	2	45384	0.402862	DTF
02:45400	2	45400	0.456262	DTF
02:45484	2	45484	0.364658	DTF
02:45530	2	45530	0.795399	DTF
02:45541	2	45541	0.50456	DTF
02:45567	2	45567	0.0474953	DTF
02:45663	2	45663	0.870745	DTF
02:45664	2	45664	0.478496	DTF
02:45738	2	45738	0.694339	DTF
02:45760	2	45760	0.689105	DTF
02:45870	2	45870	0.704911	DTF
02:45935	2	45935	0.326213	DTF
02:45949	2	45949	0.156174	DTF
02:45976	2	45976	0.172989	DTF
02:46001	2	46001	0.426545	DTF
02:46051	2	46051	0.0317618	DTF
02:46070	2	46070	0.959915	DTF
02:46168	2	46168	0.0969685	DTF
02:46173	2	46173	0.198865	DTF
02:46174	2	46174	0.625552	DTF
02:46240	2	46240	0.161053	DTF
02:46242	2	46242	0.274438	DTF
02:46267	2	46267	0.539622	DTF
02:46332	2	46332	0.594741	DTF
02:46341	2	46341	0.988052	DTF
02:46368	2	46368	0.624869	DTF
02:46387	2	46387	0.952231	DTF
02:46920	2	46920	0.356314	DTF
02:46974	2	46974	0.414498	DTF
02:47006	2	47006	0.168329	DTF
02:47022	2	47022	0.66508	DTF
02:47029	2	47029	0.837082	DTF
02:47062	2	47062	0.896354	DTF
02:47100	2	47100	0.996097	DTF
02:47131	2	47131	0.392672	DTF
02:47138	2	47138	0.233359	DTF
02:47324	2	47324	0.713605	DTF
02:47444	2	47444	0.269484	DTF
02:47584	2	47584	0.706456	DTF
02:47682	2	47682	0.321503	DTF
02:47732	2	47732	0.105072	DTF
02:47743	2	47743	0.201016	DTF
02:47802	2	47802	0.867702	DTF
02:47837	2	47837	0.505624	DTF
02:47998	2	47998	0.105134	DTF
02:48138	2	48138	0.678046	DTF
02:48141	2	48141	0.486103	DTF
02:48165	2	48165	0.388083	DTF
02:48593	2	48593	0.99166	DTF
02:48712	2	48712	0.278409	DTF
02:48729	2	48729	0.406204	DTF
02:48791	2	48791	0.724595	DTF
02:48814	2	48814	0.600763	DTF
02:48862	2	48862	0.116015	DTF
02:49001	2	49001	0.59371	DTF
02:49030	2	49030	0.762893	DTF
02:49034	2	49034	0.336465	DTF
02:49042	2	49042	0.341079	DTF
02:49082	2	49082	0.772411	DTF
02:49147	2	49147	0.860987	DTF
02:49178	2	49178	0.941299	DTF
02:49211	2	49211	0.896836	DTF
02:49213	2	49213	0.204245	DTF
02:49234	2	49234	0.535177	DTF
02:49265	2	49265	0.461866	DTF
02:49403	2	49403	0.363982	DTF
02:49430	2	49430	0.384097	DTF
02:49494	2	49494	0.323213	DTF
02:49550	2	49550	0.850156	DTF
02:49554	2	49554	0.518461	DTF
02:49604	2	49604	0.779502	DTF
02:49633	2	49633	0.460489	DTF
02:49636	2	49636	0.858928	DTF
02:49998	2	49998	0.5068	DTF
02:50001	2	50001	0.732904	DTF
02:50117	2	50117	0.0208863	DTF
02:50242	2	50242	0.333193	DTF
02:50331	2	50331	0.0789459	DTF
02:50360	2	50360	0.235276	DTF
02:50383	2	50383	0.606458	DTF
02:50418	2	50418	0.483125	DTF
02:50451	2	50451	0.887109	DTF
02:50584	2	50584	0.453235	DTF
02:50654	2	50654	0.592048	DTF
02:50681	2	50681	0.493481	DTF
02:50778	2	50778	0.50769	DTF
02:50779	2	50779	0.808441	DTF
02:50798	2	50798	0.197051	DTF
02:50852	2	50852	0.35555	DTF
02:50866	2	50866	0.194701	DTF
02:51006	2	51006	0.339022	DTF
02:51040	2	51040	0.343862	DTF
02:51112	2	51112	0.673824	DTF
02:51197	2	51197	0.908746	DTF
02:51205	2	51205	0.633906	DTF
02:51228	2	51228	0.844617	DTF
02:51336	2	51336	0.508352	DTF
02:51376	2	51376	0.0775238	DTF
02:51388	2	51388	0.951113	DTF
02:51594	2	51594	0.239631	DTF
02:51621	2	51621	0.782783	DTF
02:51659	2	51659	0.612008	DTF
02:51670	2	51670	0.327763	DTF
02:51678	2	51678	0.417146	DTF
02:51717	2	51717	0.358068	DTF
02:51719	2	51719	0.45079	DTF
02:51720	2	51720	0.45079	DTF
02:51724	2	51724	0.53004	DTF
02:51735	2	51735	0.503205	DTF
02:51781	2	51781	0.520129	DTF
02:51803	2	51803	0.256185	DTF
02:51806	2	51806	0.249862	DTF
02:51829	2	51829	0.587096	DTF
02:51954	2	51954	0.217201	DTF
02:52002	2	52002	0.984759	DTF
02:52160	2	52160	0.995828	DTF
02:52272	2	52272	0.125144	DTF
02:52274	2	52274	0.635796	DTF
02:52322	2	52322	0.335005	DTF
02:52413	2	52413	0.158445	DTF
02:52500	2	52500	0.105157	DTF
02:52547	2	52547	0.82601	DTF
02:52566	2	52566	0.705372	DTF
02:52606	2	52606	0.651887	DTF
02:52734	2	52734	0.160966	DTF
02:52796	2	52796	0.380937	DTF
02:52810	2	52810	0.241999	DTF
02:52821	2	52821	0.360193	DTF
02:52854	2	52854	0.588297	DTF
02:52917	2	52917	0.407391	DTF
02:52934	2	52934	0.390516	DTF
02:53014	2	53014	0.921737	DTF
02:53019	2	53019	0.690458	DTF
02:53102	2	53102	0.119131	DTF
02:53139	2	53139	0.647035	DTF
02:53172	2	53172	0.479055	DTF
02:53232	2	53232	0.859212	DTF
02:53405	2	53405	0.898718	DTF
02:53479	2	53479	0.764528	DTF
02:53486	2	53486	0.322146	DTF
02:53490	2	53490	0.372615	DTF
02:53534	2	53534	0.866856	DTF
02:53556	2	53556	0.672095	DTF
02:53658	2	53658	0.265792	DTF
02:53712	2	53712	0.886103	DTF
02:53725	2	53725	0.917104	DTF
02:53737	2	53737	0.719963	DTF
02:53813	2	53813	0.389918	DTF
02:53845	2	53845	0.487223	DTF
02:53856	2	53856	0.299949	DTF
02:53871	2	53871	0.207287	DTF
02:53898	2	53898	0.912846	DTF
02:53913	2	53913	0.637034	DTF
02:54133	2	54133	0.181625	DTF
02:54176	2	54176	0.993117	DTF
02:54261	2	54261	0.95958	DTF
02:54340	2	54340	0.753288	DTF
02:54363	2	54363	0.189507	DTF
02:54389	2	54389	0.805572	DTF
02:54390	2	54390	0.950863	DTF
02:54399	2	54399	0.820553	DTF
02:54526	2	54526	0.460904	DTF
02:54550	2	54550	0.956108	DTF
02:54643	2	54643	0.211261	DTF
02:54646	2	54646	0.635076	DTF
02:55054	2	55054	0.443305	DTF
02:55055	2	55055	0.177377	DTF
02:55120	2	55120	0.350634	DTF
02:55290	2	55290	0.787143	DTF
02:55307	2	55307	0.834956	DTF
02:55335	2	55335	0.489915	DTF
02:55360	2	55360	0.29887	DTF
02:55453	2	55453	0.324186	DTF
02:55598	2	55598	0.363427	DTF
02:55828	2	55828	0.756883	DTF
02:55840	2	55840	0.838608	DTF
02:55858	2	55858	0.832899	DTF
02:55940	2	55940	0.719703	DTF
02:56186	2	56186	0.857075	DTF
02:56265	2	56265	0.413234	DTF
02:56316	2	56316	0.223188	DTF
02:56368	2	56368	0.880966	DTF
02:56372	2	56372	0.0700005	DTF
02:56439	2	56439	0.907221	DTF
02:56486	2	56486	0.9873	DTF
02:56607	2	56607	0.313422	DTF
02:56718	2	56718	0.226431	DTF
02:56761	2	56761	0.71466	DTF
02:56779	2	56779	0.268859	DTF
02:56873	2	56873	0.997608	DTF
02:56893	2	56893	0.738726	DTF
02:57597	2	57597	0.969768	DTF
02:57617	2	57617	0.576328	DTF
02:57652	2	57652	0.259281	DTF
02:57657	2	57657	0.216767	DTF
02:57683	2	57683	0.191248	DTF
02:57711	2	57711	0.295083	DTF
02:57792	2	57792	0.745964	DTF
02:57898	2	57898	0.67053	DTF
02:58047	2	58047	0.768196	DTF
02:58088	2	58088	0.506659	DTF
02:58098	2	58098	0.934313	DTF
02:58105	2	58105	0.274924	DTF
02:58114	2	58114	0.956447	DTF
02:58231	2	58231	0.484476	DTF
02:58249	2	58249	0.332538	DTF
02:58267	2	58267	0.441783	DTF
02:58320	2	58320	0.976199	DTF
02:58644	2	58644	0.561159	DTF
02:58654	2	58654	0.414185	DTF
02:58703	2	58703	0.0251312	DTF
02:58704	2	58704	0.379074	DTF
02:58705	2	58705	0.654186	DTF
02:58777	2	58777	0.409335	DTF
02:58788	2	58788	0.399278	DTF
02:58888	2	58888	0.830608	DTF
02:58973	2	58973	0.952457	DTF
02:58989	2	58989	0.783379	DTF
02:59010	2	59010	0.888984	DTF
02:59041	2	59041	0.985972	DTF
02:59058	2	59058	0.146613	DTF
02:59086	2	59086	0.855037	DTF
02:59106	2	59106	0.251619	DTF
02:59175	2	59175	0.632983	DTF
02:59176	2	59176	0.632983	DTF
02:59181	2	59181	0.347997	DTF
02:59195	2	59195	0.447838	DTF
02:59202	2	59202	0.71007	DTF
02:59235	2	59235	0.533153	DTF
02:59300	2	59300	0.296653	DTF
02:59306	2	59306	0.249002	DTF
02:59417	2	59417	0.0647714	DTF
02:59418	2	59418	0.0636884	DTF
02:59425	2	59425	0.847884	DTF
02:59482	2	59482	0.336625	DTF
02:59564	2	59564	0.224007	DTF
02:59601	2	59601	0.278851	DTF
02:59645	2	59645	0.781937	DTF
02:59723	2	59723	0.448364	DTF
02:59889	2	59889	0.747336	DTF
02:59933	2	59933	0.206976	DTF
02:59935	2	59935	0.557093	DTF
02:59939	2	59939	0.403552	DTF
02:59951	2	59951	0.311623	DTF
02:60001	2	60001	0.508257	DTF
02:60067	2	60067	0.19403	DTF
02:60104	2	60104	0.111398	DTF
02:60171	2	60171	0.719051	DTF
02:60194	2	60194	0.719075	DTF
02:60267	2	60267	0.159092	DTF
02:60303	2	60303	0.383954	DTF
02:60326	2	60326	0.103412	DTF
02:60409	2	60409	0.959472	DTF
02:60546	2	60546	0.403039	DTF
02:60585	2	60585	0.710463	DTF
02:60588	2	60588	0.710463	DTF
02:60595	2	60595	0.217728	DTF
02:60693	2	60693	0.288958	DTF
02:60740	2	60740	0.762667	DTF
02:60745	2	60745	0.704679	DTF
02:60746	2	60746	0.708812	DTF
02:60863	2	60863	0.267761	DTF
02:60882	2	60882	0.261754	DTF
02:60920	2	60920	0.523429	DTF
02:60989	2	60989	0.213376	DTF
02:61039	2	61039	0.448789	DTF
02:61062	2	61062	0.743255	DTF
02:61064	2	61064	0.482032	DTF
02:61131	2	61131	0.865368	DTF
02:61163	2	61163	0.403625	DTF
02:61184	2	61184	0.867169	DTF
02:61308	2	61308	0.634116	DTF
02:61309	2	61309	0.833252	DTF
02:61348	2	61348	0.827464	DTF
02:61369	2	61369	0.502179	DTF
02:61386	2	61386	0.865351	DTF
02:61398	2	61398	0.183869	DTF
02:61426	2	61426	0.206516	DTF
02:61455	2	61455	0.71461	DTF
02:61489	2	61489	0.489726	DTF
02:61509	2	61509	0.885817	DTF
02:61528	2	61528	0.623567	DTF
02:61602	2	61602	0.64298	DTF
02:61635	2	61635	0.837066	DTF
02:61646	2	61646	0.794456	DTF
02:61673	2	61673	0.809038	DTF
02:61738	2	61738	0.24819	DTF
02:61749	2	61749	0.995548	DTF
02:61758	2	61758	0.179387	DTF
02:61780	2	61780	0.614521	DTF
02:61835	2	61835	0.516461	DTF
02:61858	2	61858	0.434034	DTF
02:61911	2	61911	0.715765	DTF
02:61934	2	61934	0.535752	DTF
02:61973	2	61973	0.658298	DTF
02:61979	2	61979	0.802914	DTF
02:61981	2	61981	0.802914	DTF
02:62009	2	62009	0.784058	DTF
02:62071	2	62071	0.254744	DTF
02:62078	2	62078	0.241342	DTF
02:62159	2	62159	0.109886	DTF
02:62160	2	62160	0.406806	DTF
02:62161	2	62161	0.404816	DTF
02:62171	2	62171	0.0948081	DTF
02:62187	2	62187	0.0341586	DTF
02:62236	2	62236	0.73802	DTF
02:62248	2	62248	0.836509	DTF
02:62302	2	62302	0.981441	DTF
02:62579	2	62579	0.764597	DTF
02:62664	2	62664	0.685695	DTF
02:62674	2	62674	0.685695	DTF
02:62688	2	62688	0.473145	DTF
02:62951	2	62951	0.911105	DTF
02:62974	2	62974	0.671201	DTF
02:63105	2	63105	0.56055	DTF
02:63594	2	63594	0.626411	DTF
02:63597	2	63597	0.524568	DTF
02:63645	2	63645	0.376909	DTF
02:63863	2	63863	0.52775	DTF
02:63882	2	63882	0.52134	DTF
02:63985	2	63985	0.871687	DTF
02:64025	2	64025	0.665053	DTF
02:64193	2	64193	0.839407	DTF
02:64195	2	64195	0.430474	DTF
02:64221	2	64221	0.298081	DTF
02:64674	2	64674	0.532379	DTF
02:64693	2	64693	0.487877	DTF
02:64734	2	64734	0.186328	DTF
02:64893	2	64893	0.728616	DTF
02:64906	2	64906	0.257995	DTF
02:64914	2	64914	0.0604385	DTF
02:65384	2	65384	0.276651	DTF
02:65448	2	65448	0.973765	DTF
02:65451	2	65451	0.983665	DTF
02:65475	2	65475	0.7838	DTF
02:65480	2	65480	0.703124	DTF
02:65501	2	65501	0.505914	DTF
02:65509	2	65509	0.454769	DTF
02:65515	2	65515	0.386925	DTF
02:65518	2	65518	0.397172	DTF
02:65522	2	65522	0.519725	DTF
02:65525	2	65525	0.486868	DTF
02:65558	2	65558	0.610538	DTF
02:65602	2	65602	0.265138	DTF
02:65615	2	65615	0.432102	DTF
02:65617	2	65617	0.417617	DTF
02:65632	2	65632	0.353257	DTF
02:65652	2	65652	0.155014	DTF
02:65713	2	65713	0.482124	DTF
02:65720	2	65720	0.861713	DTF
02:65725	2	65725	0.895827	DTF
02:65734	2	65734	0.329035	DTF
02:65736	2	65736	0.0916406	DTF
02:65821	2	65821	0.506685	DTF
02:65827	2	65827	0.429985	DTF
02:65828	2	65828	0.429985	DTF
02:65830	2	65830	0.521021	DTF
02:65848	2	65848	0.597089	DTF
02:65950	2	65950	0.433704	DTF
02:66003	2	66003	0.566931	DTF
02:66144	2	66144	0.924072	DTF
02:66249	2	66249	0.904273	DTF
02:66270	2	66270	0.523599	DTF
02:66272	2	66272	0.535577	DTF
02:66489	2	66489	0.622523	DTF
02:66499	2	66499	0.975099	DTF
02:66500	2	66500	0.975099	DTF
02:66507	2	66507	0.516849	DTF
02:66523	2	66523	0.898049	DTF
02:66560	2	66560	0.634025	DTF
02:66689	2	66689	0.885478	DTF
02:66765	2	66765	0.693815	DTF
02:66830	2	66830	0.52128	DTF
02:66845	2	66845	0.894747	DTF
02:66849	2	66849	0.943448	DTF
02:66934	2	66934	0.620451	DTF
02:67044	2	67044	0.365709	DTF
02:67046	2	67046	0.15465	DTF
02:67077	2	67077	0.690816	DTF
02:67208	2	67208	0.921068	DTF
02:67229	2	67229	0.808225	DTF
02:67238	2	67238	0.319149	DTF
02:67403	2	67403	0.742465	DTF
02:67500	2	67500	0.74672	DTF
02:67576	2	67576	0.465459	DTF
02:67706	2	67706	0.37577	DTF
02:67812	2	67812	0.777094	DTF
02:67831	2	67831	0.918537	DTF
02:67858	2	67858	0.659697	DTF
02:67974	2	67974	0.980545	DTF
02:68127	2	68127	0.827853	DTF
02:68361	2	68361	0.679122	DTF
02:68383	2	68383	0.965329	DTF
02:68397	2	68397	0.8227	DTF
02:68457	2	68457	0.256205	DTF
02:68512	2	68512	0.739262	DTF
02:68559	2	68559	0.447585	DTF
02:68614	2	68614	0.636295	DTF
02:68653	2	68653	0.974901	DTF
02:68699	2	68699	0.66832	DTF
02:68916	2	68916	0.418029	DTF
02:68918	2	68918	0.767865	DTF
02:69080	2	69080	0.545213	DTF
02:69117	2	69117	0.725579	DTF
02:69128	2	69128	0.563653	DTF
02:69138	2	69138	0.21472	DTF
02:69159	2	69159	0.834715	DTF
02:69208	2	69208	0.754117	DTF
02:69251	2	69251	0.0612496	DTF
02:70320	2	70320	0.111865	DTF
02:70333	2	70333	0.101052	DTF
02:70443	2	70443	0.425588	DTF
02:70479	2	70479	0.400942	DTF
02:70501	2	70501	0.893932	DTF
02:70524	2	70524	0.409593	DTF
02:70644	2	70644	0.728078	DTF
02:70651	2	70651	0.844759	DTF
02:70676	2	70676	0.805317	DTF
02:70684	2	70684	0.460369	DTF
02:70689	2	70689	0.374839	DTF
02:70709	2	70709	0.167161	DTF
02:70751	2	70751	0.0986433	DTF
02:70833	2	70833	0.274467	DTF
02:70851	2	70851	0.309616	DTF
02:70857	2	70857	0.185757	DTF
02:70861	2	70861	0.12086	DTF
02:70985	2	70985	0.13039	DTF
02:71003	2	71003	0.753243	DTF
02:71094	2	71094	0.245545	DTF
02:71148	2	71148	0.97047	DTF
02:71180	2	71180	0.247043	DTF
02:71213	2	71213	0.862169	DTF
02:71278	2	71278	0.380826	DTF
02:71301	2	71301	0.344351	DTF
02:71302	2	71302	0.204413	DTF
02:71326	2	71326	0.622748	DTF
02:71445	2	71445	0.55756	DTF
02:71456	2	71456	0.100552	DTF
02:71477	2	71477	0.140173	DTF
02:71508	2	71508	0.613304	DTF
02:71635	2	71635	0.699712	DTF
02:71668	2	71668	0.736489	DTF
02:71670	2	71670	0.823717	DTF
02:71671	2	71671	0.605746	DTF
02:71714	2	71714	0.304157	DTF
02:71721	2	71721	0.767959	DTF
02:71881	2	71881	0.552895	DTF
02:71883	2	71883	0.488845	DTF
02:71946	2	71946	0.766105	DTF
02:71999	2	71999	0.612809	DTF
02:72040	2	72040	0.231311	DTF
02:72065	2	72065	0.737539	DTF
02:72066	2	72066	0.454583	DTF
02:72101	2	72101	0.662725	DTF
02:72208	2	72208	0.972298	DTF
02:72214	2	72214	0.387819	DTF
02:72250	2	72250	0.139615	DTF
02:72257	2	72257	0.534067	DTF
02:72393	2	72393	0.980911	DTF
02:72394	2	72394	0.0266964	DTF
02:72407	2	72407	0.244756	DTF
02:72412	2	72412	0.351054	DTF
02:72414	2	72414	0.263109	DTF
02:72420	2	72420	0.865461	DTF
02:72423	2	72423	0.743719	DTF
02:72430	2	72430	0.643343	DTF
02:72450	2	72450	0.966682	DTF
02:72453	2	72453	0.660145	DTF
02:72502	2	72502	0.983804	DTF
02:84220	2	84220	0.505763	DTF
02:84262	2	84262	0.819765	DTF
02:84266	2	84266	0.706168	DTF
02:84269	2	84269	0.713494	DTF
02:84307	2	84307	0.958872	DTF
02:84369	2	84369	0.26798	DTF
02:84384	2	84384	0.494762	DTF
02:84385	2	84385	0.494762	DTF
02:84393	2	84393	0.832236	DTF
02:84445	2	84445	0.521966	DTF
02:84574	2	84574	0.15318	DTF
02:84593	2	84593	0.237523	DTF
02:84675	2	84675	0.496317	DTF
02:84848	2	84848	0.32187	DTF
02:84850	2	84850	0.298411	DTF
02:84851	2	84851	0.298411	DTF
02:84863	2	84863	0.639517	DTF
02:84955	2	84955	0.255625	DTF
02:85012	2	85012	0.136568	DTF
02:85020	2	85020	0.842651	DTF
02:85124	2	85124	0.406671	DTF
02:85134	2	85134	0.150968	DTF
02:85148	2	85148	0.502119	DTF
02:85161	2	85161	0.804209	DTF
02:85176	2	85176	0.648323	DTF
02:85271	2	85271	0.81057	DTF
02:85300	2	85300	0.580312	DTF
02:85350	2	85350	0.972135	DTF
02:85366	2	85366	0.887639	DTF
02:85386	2	85386	0.978368	DTF
02:85446	2	85446	0.44906	DTF
02:85559	2	85559	0.290773	DTF
02:85601	2	85601	0.115395	DTF
02:85611	2	85611	0.0581793	DTF
02:85672	2	85672	0.718626	DTF
02:85743	2	85743	0.848666	DTF
02:85753	2	85753	0.746849	DTF
02:85800	2	85800	0.638518	DTF
02:85835	2	85835	0.20888	DTF
02:85866	2	85866	0.817053	DTF
02:85887	2	85887	0.613313	DTF
02:85896	2	85896	0.547672	DTF
02:85917	2	85917	0.577358	DTF
02:85926	2	85926	0.995185	DTF
02:85959	2	85959	0.880857	DTF
02:86036	2	86036	0.669854	DTF
02:86056	2	86056	0.330085	DTF
02:86060	2	86060	0.375005	DTF
02:86111	2	86111	0.137632	DTF
02:86112	2	86112	0.37781	DTF
02:86127	2	86127	0.537257	DTF
02:86134	2	86134	0.950345	DTF
02:86163	2	86163	0.297647	DTF
02:86215	2	86215	0.158348	DTF
02:86257	2	86257	0.7395	DTF
02:86261	2	86261	0.606623	DTF
02:86268	2	86268	0.718858	DTF
02:86292	2	86292	0.327694	DTF
02:86435	2	86435	0.331131	DTF
02:86438	2	86438	0.296157	DTF
02:86445	2	86445	0.848214	DTF
02:86446	2	86446	0.834789	DTF
02:86449	2	86449	0.253564	DTF
02:86468	2	86468	0.245345	DTF
02:86535	2	86535	0.617835	DTF
02:86597	2	86597	0.404453	DTF
02:86631	2	86631	0.814901	DTF
02:86652	2	86652	0.427551	DTF
02:86658	2	86658	0.477578	DTF
02:86661	2	86661	0.0722143	DTF
02:86666	2	86666	0.978513	DTF
02:86759	2	86759	0.757205	DTF
02:86765	2	86765	0.442675	DTF
02:86782	2	86782	0.962695	DTF
02:86822	2	86822	0.664103	DTF
02:86823	2	86823	0.777224	DTF
02:86824	2	86824	0.427042	DTF
02:86859	2	86859	0.693617	DTF
02:86995	2	86995	0.722668	DTF
02:87005	2	87005	0.97282	DTF
02:87073	2	87073	0.334221	DTF
02:87084	2	87084	0.525411	DTF
02:87132	2	87132	0.525566	DTF
02:87134	2	87134	0.724955	DTF
02:87160	2	87160	0.571206	DTF
02:87218	2	87218	0.795024	DTF
02:87242	2	87242	0.943655	DTF
02:87256	2	87256	0.158806	DTF
02:87286	2	87286	0.370943	DTF
02:87352	2	87352	0.783792	DTF
02:87374	2	87374	0.382378	DTF
02:87432	2	87432	0.452677	DTF
02:87491	2	87491	0.433146	DTF
02:87544	2	87544	0.309813	DTF
02:87545	2	87545	0.944611	DTF
02:87571	2	87571	0.885288	DTF
02:87596	2	87596	0.390737	DTF
02:87614	2	87614	0.271299	DTF
02:87621	2	87621	0.942129	DTF
02:87639	2	87639	0.98913	DTF
02:87643	2	87643	0.569156	DTF
02:87744	2	87744	0.800781	DTF
02:87872	2	87872	0.961782	DTF
02:87885	2	87885	0.677609	DTF
02:87905	2	87905	0.722688	DTF
02:87978	2	87978	0.713431	DTF
02:87998	2	87998	0.00739403	DTF
02:88063	2	88063	0.343682	DTF
02:88102	2	88102	0.437447	DTF
02:88147	2	88147	0.534486	DTF
02:88287	2	88287	0.953649	DTF
02:88325	2	88325	0.191515	DTF
02:88359	2	88359	0.972453	DTF
02:88364	2	88364	0.473998	DTF
02:88381	2	88381	0.452191	DTF
02:88483	2	88483	0.771739	DTF
02:88567	2	88567	0.314458	DTF
02:88715	2	88715	0.276183	DTF
02:88797	2	88797	0.80923	DTF
02:88992	2	88992	0.134898	DTF
02:89090	2	89090	0.693579	DTF
02:89120	2	89120	0.50169	DTF
02:89153	2	89153	0.210663	DTF
02:89380	2	89380	0.660804	DTF
02:89412	2	89412	0.862541	DTF
02:89430	2	89430	0.881852	DTF
02:89463	2	89463	0.62464	DTF
02:89506	2	89506	0.929704	DTF
02:89548	2	89548	0.93253	DTF
02:89583	2	89583	0.204007	DTF
02:89607	2	89607	0.389706	DTF
02:89768	2	89768	0.524116	DTF
02:89834	2	89834	0.382827	DTF
02:89882	2	89882	0.836782	DTF
02:89974	2	89974	0.432674	DTF
02:90015	2	90015	0.154029	DTF
02:90062	2	90062	0.662144	DTF
02:90073	2	90073	0.313331	DTF
02:90081	2	90081	0.633412	DTF
02:90144	2	90144	0.540452	DTF
02:90262	2	90262	0.513708	DTF
02:90484	2	90484	0.406773	DTF
02:90486	2	90486	0.0593855	DTF
02:90591	2	90591	0.622732	DTF
02:90772	2	90772	0.0252065	DTF
02:90811	2	90811	0.0143558	DTF
02:90952	2	90952	0.855036	DTF
02:91022	2	91022	0.424848	DTF
02:91076	2	91076	0.955769	DTF
02:91079	2	91079	0.0394555	DTF
02:91096	2	91096	0.970222	DTF
02:91142	2	91142	0.21831	DTF
02:91217	2	91217	0.927036	DTF
02:91252	2	91252	0.337624	DTF
02:91254	2	91254	0.942234	DTF
02:91274	2	91274	0.42476	DTF
02:91315	2	91315	0.135483	DTF
02:91591	2	91591	0.35678	DTF
02:91647	2	91647	0.877087	DTF
02:91745	2	91745	0.119438	DTF
02:91809	2	91809	0.937221	DTF
02:91837	2	91837	0.024462	DTF
02:91847	2	91847	0.369807	DTF
02:91934	2	91934	0.477311	DTF
02:91936	2	91936	0.763669	DTF
02:92082	2	92082	0.784638	DTF
02:92084	2	92084	0.919449	DTF
02:92167	2	92167	0.58838	DTF
02:92269	2	92269	0.529216	DTF
02:92372	2	92372	0.992238	DTF
02:92435	2	92435	0.694981	DTF
02:92503	2	92503	0.173749	DTF
02:92558	2	92558	0.662309	DTF
02:92567	2	92567	0.753998	DTF
02:92572	2	92572	0.520458	DTF
02:92591	2	92591	0.840889	DTF
02:92608	2	92608	0.507255	DTF
02:92878	2	92878	0.103608	DTF
02:92911	2	92911	0.121717	DTF
02:92912	2	92912	0.140634	DTF
02:93291	2	93291	0.405882	DTF
02:93457	2	93457	0.429107	DTF
02:93551	2	93551	0.686196	DTF
02:93567	2	93567	0.825495	DTF
02:93570	2	93570	0.773175	DTF
02:93642	2	93642	0.115241	DTF
02:93702	2	93702	0.398691	DTF
02:93705	2	93705	0.675472	DTF
02:93817	2	93817	0.343719	DTF
02:93826	2	93826	0.482937	DTF
02:93839	2	93839	0.0418982	DTF
02:93856	2	93856	0.261935	DTF
02:93861	2	93861	0.097541	DTF
02:93893	2	93893	0.302048	DTF
02:93927	2	93927	0.310041	DTF
02:94269	2	94269	0.567807	DTF
02:94280	2	94280	0.425136	DTF
02:94329	2	94329	0.98943	DTF
02:94568	2	94568	0.325783	DTF
02:94588	2	94588	0.679427	DTF
02:95049	2	95049	0.9001	DTF
02:95599	2	95599	0.603524	DTF
02:96330	2	96330	0.278125	DTF
02:96777	2	96777	0.551809	DTF
02:96784	2	96784	0.824657	DTF
02:97230	2	97230	0.838142	DTF
02:97329	2	97329	0.700526	DTF
02:97371	2	97371	0.180552	DTF
02:97505	2	97505	0.326152	DTF
02:98097	2	98097	0.575524	DTF
02:98101	2	98101	0.843734	DTF
02:98289	2	98289	0.265137	DTF
02:98439	2	98439	0.864224	DTF
02:98445	2	98445	0.490852	DTF
02:99129	2	99129	0.0753604	DTF
02:99266	2	99266	0.474529	DTF
02:99585	2	99585	0.694073	DTF
02:100120	2	100120	0.592171	DTF
02:100197	2	100197	0.371876	DTF
02:100276	2	100276	0.0950346	DTF
02:101155	2	101155	0.388768	DTF
02:101173	2	101173	0.441578	DTF
02:101247	2	101247	0.56589	DTF
02:101261	2	101261	0.722158	DTF
02:101279	2	101279	0.231021	DTF
02:101305	2	101305	0.276492	DTF
02:101377	2	101377	0.873832	DTF
02:103779	2	103779	0.929994	DTF
02:103787	2	103787	0.407601	DTF
02:103960	2	103960	0.199989	DTF
02:103978	2	103978	0.682987	DTF
02:104019	2	104019	0.0037233	DTF
02:104145	2	104145	0.798722	DTF
02:104235	2	104235	0.968041	DTF
02:104298	2	104298	0.36418	DTF
02:104365	2	104365	0.631811	DTF
02:104588	2	104588	0.583346	DTF
02:104608	2	104608	0.672495	DTF
02:104643	2	104643	0.0109372	DTF
02:104645	2	104645	0.685329	DTF
02:104648	2	104648	0.426586	DTF
02:104709	2	104709	0.779618	DTF
02:104748	2	104748	0.916211	DTF
02:104884	2	104884	0.213311	DTF
02:104959	2	104959	0.229214	DTF
02:104968	2	104968	0.949766	DTF
02:104982	2	104982	0.317487	DTF
02:105014	2	105014	0.110274	DTF
02:105072	2	105072	0.441254	DTF
02:105073	2	105073	0.083762	DTF
02:105089	2	105089	0.508784	DTF
02:105130	2	105130	0.12734	DTF
02:105155	2	105155	0.755834	DTF
02:105168	2	105168	0.0324311	DTF
02:105557	2	105557	0.440471	DTF
02:105573	2	105573	0.102109	DTF
02:105662	2	105662	0.817559	DTF
02:105663	2	105663	0.799454	DTF
02:105762	2	105762	0.843873	DTF
02:105792	2	105792	0.790717	DTF
02:105794	2	105794	0.204325	DTF
02:105964	2	105964	0.965397	DTF
02:106004	2	106004	0.873033	DTF
02:106062	2	106062	0.51973	DTF
02:106067	2	106067	0.736278	DTF
02:106213	2	106213	0.661448	DTF
02:106215	2	106215	0.706217	DTF
02:106273	2	106273	0.873058	DTF
02:106339	2	106339	0.125077	DTF
02:106452	2	106452	0.0754429	DTF
02:106467	2	106467	0.812407	DTF
02:106517	2	106517	0.88314	DTF
02:106547	2	106547	0.69217	DTF
02:106570	2	106570	0.533105	DTF
02:106629	2	106629	0.445662	DTF
02:107406	2	107406	0.665636	DTF
02:107434	2	107434	0.972712	DTF
02:107450	2	107450	0.716649	DTF
02:107456	2	107456	0.111518	DTF
02:107463	2	107463	0.533341	DTF
02:107465	2	107465	0.533341	DTF
02:107500	2	107500	0.882125	DTF
02:107568	2	107568	0.817133	DTF
02:107789	2	107789	0.357042	DTF
02:107819	2	107819	0.692434	DTF
02:107861	2	107861	0.884564	DTF
02:107986	2	107986	0.481202	DTF
02:108053	2	108053	0.194612	DTF
02:108083	2	108083	0.303345	DTF
02:108293	2	108293	0.598479	DTF
02:108456	2	108456	0.518887	DTF
02:108515	2	108515	0.709048	DTF
02:108617	2	108617	0.844386	DTF
02:108638	2	108638	0.830078	DTF
02:108660	2	108660	0.730626	DTF
02:108662	2	108662	0.758742	DTF
02:108954	2	108954	0.030096	DTF
02:108955	2	108955	0.537248	DTF
02:109072	2	109072	0.512265	DTF
02:109106	2	109106	0.62968	DTF
02:109188	2	109188	0.373975	DTF
02:109194	2	109194	0.39906	DTF
02:109338	2	109338	0.713661	DTF
02:109421	2	109421	0.253919	DTF
02:109690	2	109690	0.392139	DTF
02:109693	2	109693	0.229676	DTF
02:110055	2	110055	0.202179	DTF
02:110078	2	110078	0.409202	DTF
02:110126	2	110126	0.203455	DTF
02:110149	2	110149	0.467014	DTF
02:110156	2	110156	0.0466511	DTF
02:110184	2	110184	0.257339	DTF
02:110203	2	110203	0.827275	DTF
02:110220	2	110220	0.16177	DTF
02:110223	2	110223	0.129136	DTF
02:110295	2	110295	0.682047	DTF
02:110339	2	110339	0.244681	DTF
02:110602	2	110602	0.0821402	DTF
02:110604	2	110604	0.14485	DTF
02:110620	2	110620	0.125188	DTF
02:110636	2	110636	0.77921	DTF
02:110638	2	110638	0.0973858	DTF
02:110650	2	110650	0.912162	DTF
02:110794	2	110794	0.546908	DTF
02:110816	2	110816	0.0692581	DTF
02:110824	2	110824	0.695141	DTF
02:110836	2	110836	0.373264	DTF
02:110841	2	110841	0.177081	DTF
02:110843	2	110843	0.178522	DTF
02:110897	2	110897	0.932945	DTF
02:110910	2	110910	0.736347	DTF
02:110913	2	110913	0.37656	DTF
02:111085	2	111085	0.217072	DTF
02:111119	2	111119	0.347375	DTF
02:111137	2	111137	0.137513	DTF
02:111143	2	111143	0.805936	DTF
02:111162	2	111162	0.862629	DTF
02:111165	2	111165	0.302367	DTF
02:111167	2	111167	0.3718	DTF
02:111212	2	111212	0.479829	DTF
02:111218	2	111218	0.755732	DTF
02:111230	2	111230	0.920235	DTF
02:111257	2	111257	0.436525	DTF
02:111316	2	111316	0.75276	DTF
02:111318	2	111318	0.026348	DTF
02:111320	2	111320	0.75276	DTF
02:111339	2	111339	0.629978	DTF
02:111366	2	111366	0.312543	DTF
02:111367	2	111367	0.567472	DTF
02:111373	2	111373	0.890163	DTF
02:111377	2	111377	0.307604	DTF
02:111663	2	111663	0.945542	DTF
02:111752	2	111752	0.994317	DTF
02:111769	2	111769	0.0722135	DTF
02:111827	2	111827	0.920529	DTF
02:111895	2	111895	0.340171	DTF
02:111981	2	111981	0.373291	DTF
02:112060	2	112060	0.987459	DTF
02:112067	2	112067	0.93213	DTF
02:112225	2	112225	0.974589	DTF
02:113034	2	113034	0.27452	DTF
02:113038	2	113038	0.0593791	DTF
02:113067	2	113067	0.385138	DTF
02:113157	2	113157	0.929452	DTF
02:113180	2	113180	0.96547	DTF
02:113216	2	113216	0.832841	DTF
02:113374	2	113374	0.49006	DTF
02:114662	2	114662	0.732925	DTF
02:114786	2	114786	0.316123	DTF
02:114824	2	114824	0.137613	DTF
02:114847	2	114847	0.985865	DTF
02:114874	2	114874	0.254538	DTF
02:114876	2	114876	0.266415	DTF
02:114877	2	114877	0.335692	DTF
02:114886	2	114886	0.187305	DTF
02:114894	2	114894	0.101681	DTF
02:115065	2	115065	0.180619	DTF
02:115092	2	115092	0.568598	DTF
02:115191	2	115191	0.757167	DTF
02:115213	2	115213	0.676698	DTF
02:115482	2	115482	0.675414	DTF
02:115547	2	115547	0.070833	DTF
02:115650	2	115650	0.338317	DTF
02:115782	2	115782	0.986414	DTF
02:115805	2	115805	0.0119594	DTF
02:115841	2	115841	0.608413	DTF
02:115981	2	115981	0.0600723	DTF
02:116101	2	116101	0.0294105	DTF
02:116107	2	116107	0.0458875	DTF
02:116169	2	116169	0.0308416	DTF
02:116171	2	116171	0.0304097	DTF
02:116206	2	116206	0.0895574	DTF
02:116207	2	116207	0.0895574	DTF
02:116306	2	116306	0.0305679	DTF
02:116336	2	116336	0.00785556	DTF
02:116549	2	116549	0.251869	DTF
02:116570	2	116570	0.0814954	DTF
02:116702	2	116702	0.0122152	DTF
02:116725	2	116725	0.760944	DTF
02:116758	2	116758	0.136207	DTF
02:116808	2	116808	0.449657	DTF
02:116874	2	116874	0.85756	DTF
02:117008	2	117008	0.210685	DTF
02:117126	2	117126	0.0909634	DTF
02:117316	2	117316	0.825829	DTF
02:117390	2	117390	0.826725	DTF
02:117403	2	117403	0.685968	DTF
02:117658	2	117658	0.796006	DTF
02:117664	2	117664	0.770954	DTF
02:117740	2	117740	0.330307	DTF
02:117799	2	117799	0.742085	DTF
02:117801	2	117801	0.951062	DTF
02:118017	2	118017	0.858428	DTF
02:118123	2	118123	0.385966	DTF
02:118206	2	118206	0.478711	DTF
02:118215	2	118215	0.841966	DTF
02:118251	2	118251	0.567421	DTF
02:118268	2	118268	0.676825	DTF
02:118323	2	118323	0.391725	DTF
02:118460	2	118460	0.812889	DTF
02:118461	2	118461	0.823373	DTF
02:118703	2	118703	0.99509	DTF
02:118871	2	118871	0.388203	DTF
02:119030	2	119030	0.690844	DTF
02:119037	2	119037	0.568231	DTF
02:119048	2	119048	0.609341	DTF
02:119125	2	119125	0.863479	DTF
02:119283	2	119283	0.0996895	DTF
02:119395	2	119395	0.0763224	DTF
02:119565	2	119565	0.40802	DTF
02:119600	2	119600	0.134425	DTF
02:119623	2	119623	0.527987	DTF
02:119699	2	119699	0.0529273	DTF
02:119726	2	119726	0.721203	DTF
02:119731	2	119731	0.101113	DTF
02:119787	2	119787	0.0494907	DTF
02:119841	2	119841	0.100938	DTF
02:119844	2	119844	0.387297	DTF
02:119845	2	119845	0.387297	DTF
02:119847	2	119847	0.0998187	DTF
02:119979	2	119979	0.0033705	DTF
02:120030	2	120030	0.33827	DTF
02:120122	2	120122	0.700182	DTF
02:120146	2	120146	0.104223	DTF
02:120195	2	120195	0.400621	DTF
02:120424	2	120424	0.0512862	DTF
02:120452	2	120452	0.0833549	DTF
02:120477	2	120477	0.089769	DTF
02:120485	2	120485	0.757496	DTF
02:120510	2	120510	0.79846	DTF
02:120588	2	120588	0.562045	DTF
02:120611	2	120611	0.942704	DTF
02:120644	2	120644	0.474508	DTF
02:121077	2	121077	0.536065	DTF
02:121130	2	121130	0.516087	DTF
02:121286	2	121286	0.705506	DTF
02:121403	2	121403	0.228121	DTF
02:121565	2	121565	0.406857	DTF
02:121783	2	121783	0.52759	DTF
02:121999	2	121999	0.502207	DTF
02:122000	2	122000	0.502207	DTF
02:122133	2	122133	0.876442	DTF
02:122432	2	122432	0.351985	DTF
02:122439	2	122439	0.151846	DTF
02:122671	2	122671	0.397029	DTF
02:122703	2	122703	0.74165	DTF
02:122768	2	122768	0.537048	DTF
02:122772	2	122772	0.55094	DTF
02:122777	2	122777	0.55094	DTF
02:122811	2	122811	0.88388	DTF
02:122819	2	122819	0.712711	DTF
02:122820	2	122820	0.924217	DTF
02:122831	2	122831	0.312183	DTF
02:122847	2	122847	0.36537	DTF
02:122854	2	122854	0.414536	DTF
02:122955	2	122955	0.800394	DTF
02:123386	2	123386	0.821975	DTF
02:123426	2	123426	0.132702	DTF
02:123444	2	123444	0.794993	DTF
02:123564	2	123564	0.0334495	DTF
02:123618	2	123618	0.73414	DTF
02:123655	2	123655	0.569644	DTF
02:123667	2	123667	0.613796	DTF
02:123686	2	123686	0.429702	DTF
02:123690	2	123690	0.421615	DTF
02:123703	2	123703	0.221859	DTF
02:123706	2	123706	0.477552	DTF
02:123715	2	123715	0.503157	DTF
02:123729	2	123729	0.661979	DTF
02:123748	2	123748	0.105135	DTF
02:123752	2	123752	0.104578	DTF
02:123757	2	123757	0.082689	DTF
02:123769	2	123769	0.315118	DTF
02:123778	2	123778	0.193531	DTF
02:123782	2	123782	0.263702	DTF
02:123797	2	123797	0.123511	DTF
02:123805	2	123805	0.117006	DTF
02:123815	2	123815	0.0261376	DTF
02:123859	2	123859	0.584848	DTF
02:124133	2	124133	0.773953	DTF
02:124264	2	124264	0.275529	DTF
02:124299	2	124299	0.249575	DTF
02:124521	2	124521	0.837997	DTF
02:124525	2	124525	0.490983	DTF
02:126401	2	126401	0.575179	DTF
02:127331	2	127331	0.896683	DTF
02:128942	2	128942	0.657514	DTF
02:130176	2	130176	0.0797491	DTF
02:131053	2	131053	0.10053	DTF
02:131196	2	131196	0.0506878	DTF
02:131864	2	131864	0.0757462	DTF
02:132053	2	132053	0.841714	DTF
02:132537	2	132537	0.688228	DTF
02:132810	2	132810	0.215085	DTF
02:132853	2	132853	0.745518	DTF
02:134159	2	134159	0.430515	DTF
02:136445	2	136445	0.269344	DTF
02:136518	2	136518	0.37062	DTF
02:137353	2	137353	0.35348	DTF
02:137544	2	137544	0.663391	DTF
02:137657	2	137657	0.0219539	DTF
02:138447	2	138447	0.830083	DTF
02:138546	2	138546	0.930957	DTF
02:138587	2	138587	0.744521	DTF
02:141281	2	141281	0.517711	DTF
02:142071	2	142071	0.417087	DTF
02:142705	2	142705	0.104972	DTF
02:142872	2	142872	0.21184	DTF
02:142916	2	142916	0.142942	DTF
02:143748	2	143748	0.848481	DTF
02:143871	2	143871	0.837626	DTF
02:145604	2	145604	0.333463	DTF
02:146101	2	146101	0.997217	DTF
02:146132	2	146132	0.00406346	DTF
02:147148	2	147148	0.652494	DTF
02:150448	2	150448	0.0105886	DTF
02:150538	2	150538	0.0848494	DTF
02:150666	2	150666	0.87656	DTF
02:150826	2	150826	0.625257	DTF
02:153219	2	153219	0.990811	DTF
02:153423	2	153423	0.069641	DTF
02:153533	2	153533	0.938383	DTF
02:153627	2	153627	0.204137	DTF
02:153789	2	153789	0.140955	DTF
02:153851	2	153851	0.335009	DTF
02:154055	2	154055	0.652188	DTF
02:154081	2	154081	0.204888	DTF
02:154294	2	154294	0.0951039	DTF
02:154385	2	154385	0.587997	DTF
02:154443	2	154443	0.825325	DTF
02:155129	2	155129	0.859604	DTF
02:155702	2	155702	0.876642	DTF
02:155849	2	155849	0.427402	DTF
02:155891	2	155891	0.712512	DTF
02:158227	2	158227	0.42269	DTF
02:158519	2	158519	0.859324	DTF
02:159185	2	159185	0.46404	DTF
02:162167	2	162167	0.152398	DTF
02:162251	2	162251	0.831364	DTF
02:163095	2	163095	0.456186	DTF
02:163191	2	163191	0.35826	DTF
02:163314	2	163314	0.215545	DTF
02:163530	2	163530	0.453602	DTF
02:163697	2	163697	0.281799	DTF
02:163703	2	163703	0.928004	DTF
02:163716	2	163716	0.766228	DTF
02:164000	2	164000	0.383558	DTF
02:164183	2	164183	0.154508	DTF
02:169464	2	169464	0.629344	DTF
02:170951	2	170951	0.803566	DTF
02:170968	2	170968	0.328233	DTF
02:171045	2	171045	0.630295	DTF
02:171099	2	171099	0.848117	DTF
02:171113	2	171113	0.841943	DTF
02:171261	2	171261	0.817887	DTF
02:172470	2	172470	0.925764	DTF
02:172595	2	172595	0.860882	DTF
02:173310	2	173310	0.212183	DTF
02:173312	2	173312	0.174399	DTF
02:173612	2	173612	0.296516	DTF
02:173625	2	173625	0.163711	DTF
02:173631	2	173631	0.111532	DTF
02:173637	2	173637	0.0997755	DTF
02:173656	2	173656	0.138639	DTF
02:173719	2	173719	0.29676	DTF
02:174301	2	174301	0.0396934	DTF
02:174582	2	174582	0.959695	DTF
02:174688	2	174688	0.355187	DTF
02:174689	2	174689	0.415723	DTF
02:174697	2	174697	0.24383	DTF
02:174714	2	174714	0.800169	DTF
02:174775	2	174775	0.568923	DTF
02:174796	2	174796	0.937462	DTF
02:174798	2	174798	0.935538	DTF
02:174943	2	174943	0.963342	DTF
02:175070	2	175070	0.91054	DTF
02:175079	2	175079	0.759306	DTF
02:175087	2	175087	0.0719389	DTF
02:175096	2	175096	0.94614	DTF
02:175098	2	175098	0.893277	DTF
02:175134	2	175134	0.680831	DTF
02:175202	2	175202	0.999418	DTF
02:175228	2	175228	0.210275	DTF
02:175250	2	175250	0.280523	DTF
02:175262	2	175262	0.57792	DTF
02:175336	2	175336	0.318232	DTF
02:175342	2	175342	0.374596	DTF
02:175344	2	175344	0.374596	DTF
02:175464	2	175464	0.48991	DTF
02:175471	2	175471	0.488267	DTF
02:175537	2	175537	0.744243	DTF
02:175564	2	175564	0.290787	DTF
02:175763	2	175763	0.973634	DTF
02:175789	2	175789	0.786433	DTF
02:175823	2	175823	0.944124	DTF
02:175855	2	175855	0.651731	DTF
02:175869	2	175869	0.926708	DTF
02:175870	2	175870	0.613394	DTF
02:175875	2	175875	0.791368	DTF
02:175901	2	175901	0.686317	DTF
02:175923	2	175923	0.841057	DTF
02:175937	2	175937	0.783258	DTF
02:175954	2	175954	0.572175	DTF
02:176411	2	176411	0.130853	DTF
02:176995	2	176995	0.390696	DTF
02:177013	2	177013	0.463585	DTF
02:177016	2	177016	0.629248	DTF
02:177020	2	177020	0.707807	DTF
02:177024	2	177024	0.580247	DTF
02:177029	2	177029	0.90879	DTF
02:177748	2	177748	0.283939	DTF
02:177982	2	177982	0.636181	DTF
02:178113	2	178113	0.862297	DTF
02:178123	2	178123	0.765494	DTF
02:178155	2	178155	0.328211	DTF
02:178230	2	178230	0.672217	DTF
02:178257	2	178257	0.908283	DTF
02:178760	2	178760	0.172064	DTF
02:178761	2	178761	0.322671	DTF
02:180720	2	180720	0.933818	DTF
02:180723	2	180723	0.940142	DTF
02:180751	2	180751	0.945217	DTF
02:180754	2	180754	0.980823	DTF
02:180806	2	180806	0.79944	DTF
02:180809	2	180809	0.857919	DTF
02:180832	2	180832	0.973764	DTF
02:180847	2	180847	0.189246	DTF
02:180862	2	180862	0.0246615	DTF
02:180878	2	180878	0.533741	DTF
02:180902	2	180902	0.050522	DTF
02:180908	2	180908	0.0952938	DTF
02:180910	2	180910	0.0749587	DTF
02:181800	2	181800	0.638546	DTF
02:181947	2	181947	0.847693	DTF
02:183661	2	183661	0.0469398	DTF
02:183707	2	183707	0.51335	DTF
02:183854	2	183854	0.75472	DTF
02:183902	2	183902	0.427234	DTF
02:184695	2	184695	0.667061	DTF
02:184730	2	184730	0.643421	DTF
02:185919	2	185919	0.149392	DTF
02:185935	2	185935	0.833287	DTF
02:185952	2	185952	0.711484	DTF
02:186735	2	186735	0.716407	DTF
02:190737	2	190737	0.97266	DTF
02:190741	2	190741	0.972682	DTF
02:190789	2	190789	0.892024	DTF
02:190825	2	190825	0.442132	DTF
02:191200	2	191200	0.261103	DTF
02:192714	2	192714	0.859783	DTF
02:192893	2	192893	0.491157	DTF
02:193402	2	193402	0.046742	DTF
02:193437	2	193437	0.833958	DTF
02:193643	2	193643	0.126561	DTF
02:193950	2	193950	0.664492	DTF
02:193995	2	193995	0.745107	DTF
02:194019	2	194019	0.652467	DTF
02:194069	2	194069	0.598742	DTF
02:194183	2	194183	0.0523251	DTF
02:194524	2	194524	0.274525	DTF
02:194681	2	194681	0.538806	DTF
02:194747	2	194747	0.916381	DTF
02:194749	2	194749	0.3564	DTF
02:194924	2	194924	0.164284	DTF
02:195002	2	195002	0.504722	DTF
02:195019	2	195019	0.730581	DTF
02:195439	2	195439	0.676776	DTF
02:195704	2	195704	0.509408	DTF
02:195764	2	195764	0.248496	DTF
02:195886	2	195886	0.63432	DTF
02:196163	2	196163	0.65673	DTF
02:196347	2	196347	0.832027	DTF
02:196394	2	196394	0.962318	DTF
02:196854	2	196854	0.644697	DTF
02:197095	2	197095	0.755757	DTF
02:197161	2	197161	0.824871	DTF
02:197552	2	197552	0.841929	DTF
02:197659	2	197659	0.860032	DTF
02:197871	2	197871	0.683433	DTF
02:197922	2	197922	0.57113	DTF
02:198158	2	198158	0.675451	DTF
02:198793	2	198793	0.0508482	DTF
02:198814	2	198814	0.844413	DTF
02:198891	2	198891	0.394411	DTF
02:199014	2	199014	0.28717	DTF
02:202767	2	202767	0.615334	DTF
02:203652	2	203652	0.83897	DTF
02:203940	2	203940	0.161577	DTF
02:204163	2	204163	0.620358	DTF
02:207112	2	207112	0.692897	DTF
02:207144	2	207144	0.534317	DTF
02:207159	2	207159	0.131934	DTF
02:207340	2	207340	0.548881	DTF
02:207359	2	207359	0.696026	DTF
02:207395	2	207395	0.580925	DTF
02:207567	2	207567	0.897746	DTF
02:208698	2	208698	0.0202413	DTF
02:208723	2	208723	0.355126	DTF
02:208749	2	208749	0.64468	DTF
02:208766	2	208766	0.38258	DTF
02:208820	2	208820	0.210158	DTF
02:208826	2	208826	0.107999	DTF
02:211702	2	211702	0.650065	DTF
02:211755	2	211755	0.723399	DTF
02:214049	2	214049	0.51194	DTF
02:214056	2	214056	0.772439	DTF
02:214118	2	214118	0.220053	DTF
02:217832	2	217832	0.349157	DTF
02:217933	2	217933	0.240153	DTF
02:218579	2	218579	0.293556	DTF
02:218768	2	218768	0.314136	DTF
02:218790	2	218790	0.514083	DTF
02:218868	2	218868	0.512814	DTF
02:218883	2	218883	0.593157	DTF
02:220435	2	220435	0.534548	DTF
02:220444	2	220444	0.469412	DTF
02:220551	2	220551	0.0336719	DTF
02:225348	2	225348	0.354232	DTF
02:225460	2	225460	0.337622	DTF
02:225464	2	225464	0.404392	DTF
02:225472	2	225472	0.336762	DTF
02:225769	2	225769	0.903755	DTF
02:225834	2	225834	0.132431	DTF
02:225941	2	225941	0.30647	DTF
02:226014	2	226014	0.0206737	DTF
02:226061	2	226061	0.602674	DTF
02:226292	2	226292	0.824839	DTF
02:226295	2	226295	0.674084	DTF
02:226998	2	226998	0.806401	DTF
02:231088	2	231088	0.928243	DTF
02:231152	2	231152	0.677442	DTF
02:231268	2	231268	0.169836	DTF
02:231367	2	231367	0.506463	DTF
02:231387	2	231387	0.627177	DTF
02:231426	2	231426	0.953604	DTF
02:231441	2	231441	0.965469	DTF
02:231469	2	231469	0.361188	DTF
02:231520	2	231520	0.290999	DTF
02:233373	2	233373	0.810989	DTF
02:236573	2	236573	0.449354	DTF
02:236616	2	236616	0.406516	DTF
02:237799	2	237799	0.113634	DTF
02:237998	2	237998	0.431365	DTF
02:238086	2	238086	0.630782	DTF
02:238153	2	238153	0.618728	DTF
02:238685	2	238685	0.510897	DTF
02:239169	2	239169	0.225456	DTF
02:239403	2	239403	0.296958	DTF
02:239850	2	239850	0.831882	DTF
02:239946	2	239946	0.185534	DTF
02:240084	2	240084	0.806693	DTF
02:240915	2	240915	0.321298	DTF
02:240986	2	240986	0.18326	DTF
02:242723	2	242723	0.180867	DTF
02:245329	2	245329	0.287109	DTF
02:245358	2	245358	0.799907	DTF
02:251063	2	251063	0.355544	DTF
02:251066	2	251066	0.51437	DTF
02:251098	2	251098	0.209347	DTF
02:251267	2	251267	0.401743	DTF
02:251276	2	251276	0.0930318	DTF
02:251503	2	251503	0.0946139	DTF
02:254284	2	254284	0.180742	DTF
02:254659	2	254659	0.220415	DTF
02:254705	2	254705	0.989901	DTF
02:254745	2	254745	0.811395	DTF
02:255586	2	255586	0.477614	DTF
02:256856	2	256856	0.101558	DTF
02:256907	2	256907	0.158107	DTF
02:256914	2	256914	0.906308	DTF
02:256935	2	256935	0.612867	DTF
02:256936	2	256936	0.736226	DTF
02:258240	2	258240	0.194207	DTF
02:258316	2	258316	0.011149	DTF
02:258319	2	258319	0.0122272	DTF
02:258374	2	258374	0.037985	DTF
02:258377	2	258377	0.0338242	DTF
02:259858	2	259858	0.245727	DTF
02:261656	2	261656	0.813018	DTF
02:261657	2	261657	0.810087	DTF
02:261666	2	261666	0.218009	DTF
02:261678	2	261678	0.567275	DTF
02:261822	2	261822	0.55702	DTF
02:261849	2	261849	0.585269	DTF
02:261886	2	261886	0.080671	DTF
02:262045	2	262045	0.611585	DTF
02:262870	2	262870	0.561272	DTF
02:263754	2	263754	0.333558	DTF
02:263824	2	263824	0.189799	DTF
02:266607	2	266607	0.0153749	DTF
02:266685	2	266685	0.228635	DTF
02:266758	2	266758	0.498503	DTF
02:266796	2	266796	0.479797	DTF
02:269273	2	269273	0.263527	DTF
02:269752	2	269752	0.38523	DTF
02:270702	2	270702	0.113609	DTF
02:270733	2	270733	0.808838	DTF
02:275194	2	275194	0.481419	DTF
02:275290	2	275290	0.379636	DTF
02:276834	2	276834	0.264046	DTF
02:276854	2	276854	0.0292082	DTF
02:278149	2	278149	0.356224	DTF
02:278171	2	278171	0.340028	DTF
02:278174	2	278174	0.205572	DTF
02:278610	2	278610	0.544135	DTF
02:278626	2	278626	0.822548	DTF
02:279096	2	279096	0.854834	DTF
02:285115	2	285115	0.80189	DTF
02:285962	2	285962	0.502319	DTF
02:286591	2	286591	0.307721	DTF
02:287749	2	287749	0.707004	DTF
02:287968	2	287968	0.676672	DTF
02:291618	2	291618	0.183486	DTF
02:292165	2	292165	0.783674	DTF
02:294471	2	294471	0.931143	DTF
02:294826	2	294826	0.0333992	DTF
02:296157	2	296157	0.647694	DTF
02:296384	2	296384	0.368495	DTF
02:296751	2	296751	0.72599	DTF
02:296903	2	296903	0.715563	DTF
02:297052	2	297052	0.813514	DTF
02:297279	2	297279	0.174677	DTF
02:298732	2	298732	0.607678	DTF
02:298999	2	298999	0.689063	DTF
02:301654	2	301654	0.310252	DTF
02:302097	2	302097	0.80099	DTF
02:303413	2	303413	0.620085	DTF
02:303564	2	303564	0.204877	DTF
02:303586	2	303586	0.552245	DTF
02:305576	2	305576	0.847595	DTF
02:307681	2	307681	0.660485	DTF
02:312675	2	312675	0.867736	DTF
02:313904	2	313904	0.36228	DTF
02:315431	2	315431	0.0514835	DTF
02:316083	2	316083	0.869695	DTF
02:316186	2	316186	0.444774	DTF
02:316354	2	316354	0.400368	DTF
02:317533	2	317533	0.367979	DTF
02:318820	2	318820	0.0881389	DTF
02:319830	2	319830	0.10988	DTF
02:320071	2	320071	0.0903906	DTF
02:320674	2	320674	0.655969	DTF
02:322472	2	322472	0.62404	DTF
02:327387	2	327387	0.838605	DTF
02:327558	2	327558	0.833682	DTF
02:328482	2	328482	0.00695598	DTF
02:329445	2	329445	0.0783056	DTF
02:331300	2	331300	0.107571	DTF
02:331393	2	331393	0.219825	DTF
02:331800	2	331800	0.775901	DTF
02:332097	2	332097	0.634931	DTF
02:332168	2	332168	0.695451	DTF
02:332651	2	332651	0.788393	DTF
02:332660	2	332660	0.105753	DTF
02:332744	2	332744	0.166162	DTF
02:333712	2	333712	0.225569	DTF
02:334020	2	334020	0.489143	DTF
02:334047	2	334047	0.904615	DTF
02:334133	2	334133	0.488475	DTF
02:334311	2	334311	0.946204	DTF
02:335117	2	335117	0.990892	DTF
02:335151	2	335151	0.693082	DTF
02:335353	2	335353	0.738296	DTF
02:336563	2	336563	0.765648	DTF
02:336765	2	336765	0.887543	DTF
02:338855	2	338855	0.713753	DTF
02:340422	2	340422	0.0881582	DTF
02:340788	2	340788	0.727757	DTF
02:343039	2	343039	0.0853483	DTF
02:346763	2	346763	0.137836	DTF
02:346797	2	346797	0.125991	DTF
02:346875	2	346875	0.445853	DTF
02:346921	2	346921	0.117352	DTF
02:346949	2	346949	0.473312	DTF
02:349064	2	349064	0.910032	DTF
02:350380	2	350380	0.694033	DTF
02:350744	2	350744	0.838239	DTF
02:350770	2	350770	0.509199	DTF
02:350941	2	350941	0.638344	DTF
02:350953	2	350953	0.407488	DTF
02:350985	2	350985	0.757841	DTF
02:351003	2	351003	0.821256	DTF
02:351241	2	351241	0.0820366	DTF
02:351330	2	351330	0.01981	DTF
02:355261	2	355261	0.330788	DTF
02:355290	2	355290	0.843101	DTF
02:355444	2	355444	0.201176	DTF
02:355485	2	355485	0.664684	DTF
02:356169	2	356169	0.239494	DTF
02:357803	2	357803	0.683971	DTF
02:357992	2	357992	0.43873	DTF
02:359744	2	359744	0.199633	DTF
02:369060	2	369060	0.447798	DTF
02:369106	2	369106	0.586189	DTF
02:369252	2	369252	0.583958	DTF
02:369265	2	369265	0.0771565	DTF
02:369266	2	369266	0.0792251	DTF
02:369268	2	369268	0.40174	DTF
02:370156	2	370156	0.859283	DTF
02:370190	2	370190	0.880689	DTF
02:370349	2	370349	0.950899	DTF
02:370357	2	370357	0.528881	DTF
02:370454	2	370454	0.897073	DTF
02:370465	2	370465	0.93138	DTF
02:370598	2	370598	0.507075	DTF
02:370603	2	370603	0.983542	DTF
02:370635	2	370635	0.81131	DTF
02:370642	2	370642	0.112455	DTF
02:370647	2	370647	0.11782	DTF
02:370669	2	370669	0.779228	DTF
02:370670	2	370670	0.0683898	DTF
02:370681	2	370681	0.853375	DTF
02:370682	2	370682	0.109595	DTF
02:370688	2	370688	0.112992	DTF
02:370689	2	370689	0.112992	DTF
02:373971	2	373971	0.735238	DTF
02:373985	2	373985	0.638191	DTF
02:374099	2	374099	0.147244	DTF
02:374487	2	374487	0.581819	DTF
02:374501	2	374501	0.60153	DTF
02:374507	2	374507	0.525163	DTF
02:375049	2	375049	0.319725	DTF
02:375067	2	375067	0.706907	DTF
02:375678	2	375678	0.861193	DTF
02:375690	2	375690	0.680957	DTF
02:375815	2	375815	0.511001	DTF
02:375865	2	375865	0.436909	DTF
02:376007	2	376007	0.701187	DTF
02:376060	2	376060	0.108835	DTF
02:376542	2	376542	0.398766	DTF
02:376586	2	376586	0.867476	DTF
02:377278	2	377278	0.918823	DTF
02:377419	2	377419	0.285773	DTF
02:377568	2	377568	0.947932	DTF
02:377662	2	377662	0.444187	DTF
02:377676	2	377676	0.130992	DTF
02:377822	2	377822	0.891101	DTF
02:378181	2	378181	0.433701	DTF
02:378242	2	378242	0.566592	DTF
02:378286	2	378286	0.882479	DTF
02:378739	2	378739	0.197711	DTF
02:378807	2	378807	0.974881	DTF
02:378873	2	378873	0.760448	DTF
02:384079	2	384079	0.3606	DTF
02:384141	2	384141	0.283582	DTF
02:384161	2	384161	0.28386	DTF
02:384243	2	384243	0.504833	DTF
02:384259	2	384259	0.940028	DTF
02:384573	2	384573	0.802494	DTF
02:385177	2	385177	0.658659	DTF
02:385187	2	385187	0.281744	DTF
02:385253	2	385253	0.402176	DTF
02:385343	2	385343	0.825414	DTF
02:385418	2	385418	0.780571	DTF
02:387491	2	387491	0.619844	DTF
02:387723	2	387723	0.719497	DTF
02:388590	2	388590	0.42235	DTF
02:388616	2	388616	0.36582	DTF
02:388634	2	388634	0.723273	DTF
02:389696	2	389696	0.629499	DTF
02:389905	2	389905	0.603353	DTF
02:391461	2	391461	0.768703	DTF
02:391990	2	391990	0.371239	DTF
02:391992	2	391992	0.544401	DTF
02:391994	2	391994	0.504294	DTF
02:391996	2	391996	0.501856	DTF
02:397952	2	397952	0.974735	DTF
02:398480	2	398480	0.34951	DTF
02:401030	2	401030	0.356685	DTF
02:402566	2	402566	0.61817	DTF
02:402945	2	402945	0.983737	DTF
02:403354	2	403354	0.537828	DTF
02:403669	2	403669	0.961687	DTF
02:406782	2	406782	0.339438	DTF
02:407899	2	407899	0.991101	DTF
02:408563	2	408563	0.428845	DTF
02:408741	2	408741	0.261578	DTF
02:410871	2	410871	0.396339	DTF
02:410878	2	410878	0.960817	DTF
02:410882	2	410882	0.374759	DTF
02:410886	2	410886	0.671181	DTF
02:411051	2	411051	0.638563	DTF
02:411380	2	411380	0.793146	DTF
02:411696	2	411696	0.37791	DTF
02:411961	2	411961	0.825291	DTF
02:412467	2	412467	0.698581	DTF
02:412525	2	412525	0.804819	DTF
02:413699	2	413699	0.453783	DTF
02:415910	2	415910	0.990414	DTF
02:416241	2	416241	0.961567	DTF
02:416314	2	416314	0.0893776	DTF
02:416336	2	416336	0.203859	DTF
02:416547	2	416547	0.692062	DTF
02:416972	2	416972	0.245051	DTF
02:418253	2	418253	0.977591	DTF
02:418271	2	418271	0.95602	DTF
02:418669	2	418669	0.711581	DTF
02:418864	2	418864	0.487176	DTF
02:418877	2	418877	0.456974	DTF
02:418971	2	418971	0.249677	DTF
02:419021	2	419021	0.953105	DTF
02:419049	2	419049	0.976878	DTF
02:419055	2	419055	0.953677	DTF
02:419063	2	419063	0.725336	DTF
02:419064	2	419064	0.728917	DTF
02:419093	2	419093	0.376737	DTF
02:419103	2	419103	0.697906	DTF
02:419248	2	419248	0.724071	DTF
02:419463	2	419463	0.454124	DTF
02:419475	2	419475	0.776603	DTF
02:419522	2	419522	0.650127	DTF
02:419569	2	419569	0.758665	DTF
02:419928	2	419928	0.791381	DTF
02:420019	2	420019	0.303456	DTF
02:420067	2	420067	0.930926	DTF
02:420329	2	420329	0.712432	DTF
02:420700	2	420700	0.630804	DTF
02:420719	2	420719	0.617717	DTF
02:421436	2	421436	0.899272	DTF
02:421566	2	421566	0.916579	DTF
02:421643	2	421643	0.203884	DTF
02:422748	2	422748	0.777279	DTF
02:422761	2	422761	0.00570914	DTF
02:422783	2	422783	0.864226	DTF
02:424832	2	424832	0.682099	DTF
02:424866	2	424866	0.749438	DTF
02:424910	2	424910	0.62505	DTF
02:424926	2	424926	0.654977	DTF
02:425003	2	425003	0.70243	DTF
02:425921	2	425921	0.773991	DTF
02:425922	2	425922	0.776621	DTF
02:427311	2	427311	0.758867	DTF
02:427710	2	427710	0.0788482	DTF
02:427770	2	427770	0.299675	DTF
02:427823	2	427823	0.406157	DTF
02:427916	2	427916	0.757068	DTF
02:428505	2	428505	0.551235	DTF
02:428677	2	428677	0.474387	DTF
02:428856	2	428856	0.759037	DTF
02:428948	2	428948	0.450441	DTF
02:429116	2	429116	0.143693	DTF
02:431507	2	431507	0.424156	DTF
02:431519	2	431519	0.802074	DTF
02:432066	2	432066	0.704814	DTF
02:434944	2	434944	0.114446	DTF
02:435440	2	435440	0.29902	DTF
02:435479	2	435479	0.461602	DTF
02:435492	2	435492	0.0612161	DTF
02:435514	2	435514	0.154825	DTF
02:435566	2	435566	0.720267	DTF
02:435813	2	435813	0.845486	DTF
02:435834	2	435834	0.498495	DTF
02:435998	2	435998	0.650999	DTF
02:436020	2	436020	0.936376	DTF
02:436159	2	436159	0.612529	DTF
02:436439	2	436439	0.756628	DTF
02:436558	2	436558	0.188295	DTF
02:436701	2	436701	0.919912	DTF
02:436832	2	436832	0.916022	DTF
02:437235	2	437235	0.520972	DTF
02:437405	2	437405	0.591196	DTF
02:437472	2	437472	0.134892	DTF
02:437490	2	437490	0.825064	DTF
02:438878	2	438878	0.0542564	DTF
02:439782	2	439782	0.608646	DTF
02:439814	2	439814	0.190567	DTF
02:440084	2	440084	0.724168	DTF
02:440433	2	440433	0.914126	DTF
02:440442	2	440442	0.94689	DTF
02:440443	2	440443	0.996565	DTF
02:443116	2	443116	0.332673	DTF
02:443272	2	443272	0.738067	DTF
02:444398	2	444398	0.52354	DTF
02:444413	2	444413	0.256608	DTF
02:444886	2	444886	0.408005	DTF
02:444940	2	444940	0.89616	DTF
02:445518	2	445518	0.592109	DTF
02:446086	2	446086	0.912128	DTF
02:446273	2	446273	0.33634	DTF
02:446315	2	446315	0.205738	DTF
02:446330	2	446330	0.294346	DTF
02:446391	2	446391	0.321378	DTF
02:446461	2	446461	0.968473	DTF
02:446525	2	446525	0.206554	DTF
02:446755	2	446755	0.225003	DTF
02:446899	2	446899	0.467822	DTF
02:447067	2	447067	0.513595	DTF
02:447352	2	447352	0.907111	DTF
02:447488	2	447488	0.313725	DTF
02:447594	2	447594	0.60873	DTF
02:452432	2	452432	0.880301	DTF
02:453950	2	453950	0.65631	DTF
02:453979	2	453979	0.850406	DTF
02:454128	2	454128	0.182953	DTF
02:457670	2	457670	0.66858	DTF
02:457691	2	457691	0.353193	DTF
02:458180	2	458180	0.886363	DTF
02:459581	2	459581	0.262891	DTF
02:460368	2	460368	0.119714	DTF
02:462469	2	462469	0.863215	DTF
02:463225	2	463225	0.723112	DTF
02:464277	2	464277	0.642298	DTF
02:465789	2	465789	0.497881	DTF
02:466658	2	466658	0.521369	DTF
02:467584	2	467584	0.744141	DTF
02:467866	2	467866	0.503296	DTF
02:468083	2	468083	0.92188	DTF
02:469097	2	469097	0.592616	DTF
02:469972	2	469972	0.563547	DTF
02:471561	2	471561	0.119805	DTF
02:472006	2	472006	0.0342585	DTF
02:472013	2	472013	0.805841	DTF
02:473060	2	473060	0.0540359	DTF
02:473143	2	473143	0.351345	DTF
02:478460	2	478460	0.778234	DTF
02:483220	2	483220	0.832728	DTF
02:485613	2	485613	0.992488	DTF
02:488469	2	488469	0.999694	DTF
02:488880	2	488880	0.724887	DTF
02:491920	2	491920	0.713166	DTF
02:493487	2	493487	0.925192	DTF
02:493733	2	493733	0.959281	DTF
02:494561	2	494561	0.982634	DTF
02:494833	2	494833	0.48363	DTF
02:495695	2	495695	0.267407	DTF
02:495764	2	495764	0.428935	DTF
02:496140	2	496140	0.922387	DTF
02:496405	2	496405	0.682099	DTF
02:496850	2	496850	0.613685	DTF
[truncated: 586,664+ more rows]
