# Supplementary material for: Genome-wide association study in quinoa reveals selection pattern typical for crops with a short breeding history
Source: eLife. 2022 Jul 8;11:e66873. doi: 10.7554/eLife.66873 (PMC9388097; doi:10.7554/eLife.66873)
Supplement: Figure 3—source data 2. [file elife-66873-fig3-data2.xlsx]

## Sheet: Sheet1
Fig. 3b-Source data 3b
Fig. 3: Boxplots showing the average performance for four traits over two years, depending on single nucleotide variation (C or G allele) within locus Cq2A_ 8093547.
ID	SCQ2A_8093547	Hap	QP	year	Unit	Trait
10176	G	G	QP-276	Y_2018	74.4286	DTF
10176	G	G	QP-276	Y_2019	82.2857	DTF
10178	G	G	QP-164	Y_2018	61.6392	DTF
10178	G	G	QP-164	Y_2019	65.874	DTF
S1A10	G	G	QP-076	Y_2018	66.619	DTF
S1A10	G	G	QP-076	Y_2019	77.4286	DTF
S1A2	G	G	QP-014	Y_2018	78.9375	DTF
S1A2	G	G	QP-014	Y_2019	81.8571	DTF
S1A3	G	G	QP-022	Y_2018	67.7738	DTF
S1A3	G	G	QP-022	Y_2019	74.8804	DTF
S1A5	C	C	QP-038	Y_2018	57.648	DTF
S1A5	C	C	QP-038	Y_2019	66.0476	DTF
S1A6	C	C	QP-046	Y_2018	54.8095	DTF
S1A6	C	C	QP-046	Y_2019	57.0476	DTF
S1A8	C	C	QP-061	Y_2018	55.5238	DTF
S1A8	C	C	QP-061	Y_2019	63.0476	DTF
S1A9	G	G	QP-068	Y_2018	67.7143	DTF
S1A9	G	G	QP-068	Y_2019	70.7507	DTF
S1B1	C	C	QP-006	Y_2018	60	DTF
S1B1	C	C	QP-006	Y_2019	63.5714	DTF
S1B3	C	C	QP-021	Y_2018	78.4286	DTF
S1B3	C	C	QP-021	Y_2019	82.5238	DTF
S1B4	G	G	QP-029	Y_2018	57.8127	DTF
S1B4	G	G	QP-029	Y_2019	59.9524	DTF
S1B5	G	G	QP-037	Y_2019	72.0476	DTF
S1B5	G	G	QP-037	Y_2018	73.0706	DTF
S1B6	C	C	QP-045	Y_2018	57.0545	DTF
S1B6	C	C	QP-045	Y_2019	63.381	DTF
S1B8	C	C	QP-060	Y_2018	46.7143	DTF
S1B8	C	C	QP-060	Y_2019	57.7143	DTF
S1C1	C	C	QP-005	Y_2018	53.8571	DTF
S1C1	C	C	QP-005	Y_2019	61.619	DTF
S1C10	G	G	QP-074	Y_2018	72.619	DTF
S1C10	G	G	QP-074	Y_2019	79.5029	DTF
S1C2	G	G	QP-013	Y_2018	65.7143	DTF
S1C2	G	G	QP-013	Y_2019	76.8244	DTF
S1C3	G	G	QP-020	Y_2018	67.5238	DTF
S1C3	G	G	QP-020	Y_2019	73.9724	DTF
S1C4	G	G	QP-028	Y_2018	64	DTF
S1C4	G	G	QP-028	Y_2019	66.5714	DTF
S1C6	C	C	QP-044	Y_2018	60.3875	DTF
S1C6	C	C	QP-044	Y_2019	65.381	DTF
S1C7	G	G	QP-052	Y_2018	70.3436	DTF
S1C7	G	G	QP-052	Y_2019	70.5714	DTF
S1C9	C	C	QP-066	Y_2018	57.6667	DTF
S1C9	C	C	QP-066	Y_2019	63.1429	DTF
S1D1	C	C	QP-004	Y_2018	54	DTF
S1D1	C	C	QP-004	Y_2019	57.7619	DTF
S1D10	C	C	QP-073	Y_2018	57.2383	DTF
S1D10	C	C	QP-073	Y_2019	65.0952	DTF
S1D11	G	G	QP-081	Y_2018	61.3333	DTF
S1D11	G	G	QP-081	Y_2019	66.4473	DTF
S1D2	G	G	QP-012	Y_2018	60.1429	DTF
S1D2	G	G	QP-012	Y_2019	65.3333	DTF
S1D3	C	C	QP-019	Y_2018	58.2857	DTF
S1D3	C	C	QP-019	Y_2019	59.4529	DTF
S1D4	G	G	QP-027	Y_2018	55.1906	DTF
S1D4	G	G	QP-027	Y_2019	58.9048	DTF
S1D5	C	C	QP-035	Y_2018	52.9048	DTF
S1D5	C	C	QP-035	Y_2019	57.381	DTF
S1D6	C	C	QP-043	Y_2018	53.8571	DTF
S1D6	C	C	QP-043	Y_2019	59.3333	DTF
S1D8	G	G	QP-058	Y_2018	82.619	DTF
S1D8	G	G	QP-058	Y_2019	86.5714	DTF
S1E1	C	C	QP-003	Y_2018	47.6667	DTF
S1E1	C	C	QP-003	Y_2019	60.4762	DTF
S1E11	G	G	QP-080	Y_2019	81.1905	DTF
S1E11	G	G	QP-080	Y_2018	82.4286	DTF
S1E2	G	G	QP-011	Y_2018	62.5238	DTF
S1E2	G	G	QP-011	Y_2019	75.4286	DTF
S1E3	C	C	QP-018	Y_2018	57.3942	DTF
S1E3	C	C	QP-018	Y_2019	65.1905	DTF
S1E4	C	C	QP-026	Y_2018	56.1429	DTF
S1E4	C	C	QP-026	Y_2019	60.2381	DTF
S1E5	G	G	QP-034	Y_2018	61.5714	DTF
S1E5	G	G	QP-034	Y_2019	67.0952	DTF
S1E6	C	C	QP-042	Y_2018	55.6667	DTF
S1E6	C	C	QP-042	Y_2019	58.5714	DTF
S1E8	G	G	QP-057	Y_2018	72.2832	DTF
S1E8	G	G	QP-057	Y_2019	77.1429	DTF
S1E9	C	C	QP-065	Y_2018	48.8095	DTF
S1E9	C	C	QP-065	Y_2019	54.1429	DTF
S1F1	C	C	QP-002	Y_2018	49	DTF
S1F1	C	C	QP-002	Y_2019	54.9524	DTF
S1F10	G	G	QP-071	Y_2018	59.0476	DTF
S1F10	G	G	QP-071	Y_2019	62.3333	DTF
S1F11	G	G	QP-079	Y_2018	66.1905	DTF
S1F11	G	G	QP-079	Y_2019	72.1111	DTF
S1F2	G	G	QP-010	Y_2018	64.0952	DTF
S1F2	G	G	QP-010	Y_2019	67.8954	DTF
S1F3	G	G	QP-017	Y_2018	65.7309	DTF
S1F3	G	G	QP-017	Y_2019	73.4762	DTF
S1F4	G	G	QP-025	Y_2018	81.8889	DTF
S1F4	G	G	QP-025	Y_2019	82	DTF
S1F5	G	G	QP-033	Y_2018	78.5238	DTF
S1F5	G	G	QP-033	Y_2019	80.8571	DTF
S1F6	C	C	QP-041	Y_2018	49.4286	DTF
S1F6	C	C	QP-041	Y_2019	57.9524	DTF
S1F7	C	C	QP-049	Y_2018	67.3333	DTF
S1F7	C	C	QP-049	Y_2019	73.5461	DTF
S1F8	G	G	QP-056	Y_2018	54.8571	DTF
S1F8	G	G	QP-056	Y_2019	58.0476	DTF
S1F9	G	G	QP-064	Y_2018	53.534	DTF
S1F9	G	G	QP-064	Y_2019	59.7619	DTF
S1G1	C	C	QP-001	Y_2018	60.8571	DTF
S1G1	C	C	QP-001	Y_2019	68.7143	DTF
S1G10	G	G	QP-070	Y_2018	71.6667	DTF
S1G10	G	G	QP-070	Y_2019	71.8095	DTF
S1G11	G	G	QP-078	Y_2018	54.8781	DTF
S1G11	G	G	QP-078	Y_2019	57.9031	DTF
S1G3	G	G	QP-016	Y_2018	54.8095	DTF
S1G3	G	G	QP-016	Y_2019	63	DTF
S1G4	G	G	QP-024	Y_2019	76.9338	DTF
S1G4	G	G	QP-024	Y_2018	77.8724	DTF
S1G5	C	C	QP-032	Y_2018	54.2381	DTF
S1G5	C	C	QP-032	Y_2019	60.1905	DTF
S1G6	G	G	QP-040	Y_2019	77.5301	DTF
S1G6	G	G	QP-040	Y_2018	78.381	DTF
S1G7	C	C	QP-048	Y_2018	55.9524	DTF
S1G7	C	C	QP-048	Y_2019	62.0476	DTF
S1G8	C	C	QP-055	Y_2018	59.741	DTF
S1G8	C	C	QP-055	Y_2019	64.7619	DTF
S1G9	C	C	QP-063	Y_2018	55.619	DTF
S1G9	C	C	QP-063	Y_2019	62.381	DTF
S1H11	G	G	QP-077	Y_2018	63.9524	DTF
S1H11	G	G	QP-077	Y_2019	70.687	DTF
S1H2	G	G	QP-008	Y_2018	54.8095	DTF
S1H2	G	G	QP-008	Y_2019	60.0952	DTF
S1H3	G	G	QP-015	Y_2018	74.7394	DTF
S1H3	G	G	QP-015	Y_2019	76.2745	DTF
S1H4	G	G	QP-023	Y_2018	58.0952	DTF
S1H4	G	G	QP-023	Y_2019	62.2381	DTF
S1H6	C	C	QP-039	Y_2018	62.0952	DTF
S1H6	C	C	QP-039	Y_2019	65.8707	DTF
S1H7	C	C	QP-047	Y_2018	58.8095	DTF
S1H8	G	G	QP-054	Y_2018	57.619	DTF
S1H8	G	G	QP-054	Y_2019	63.381	DTF
S1H9	C	C	QP-062	Y_2018	78.0952	DTF
S1H9	C	C	QP-062	Y_2019	83.7143	DTF
S2A1	G	G	QP-101	Y_2018	73.9048	DTF
S2A1	G	G	QP-101	Y_2019	82.0476	DTF
S2A4	C	C	QP-123	Y_2018	60	DTF
S2A4	C	C	QP-123	Y_2019	66.8095	DTF
S2A5	G	G	QP-131	Y_2018	69.7619	DTF
S2A5	G	G	QP-131	Y_2019	75.5862	DTF
S2A6	C	C	QP-139	Y_2018	55.0952	DTF
S2A6	C	C	QP-139	Y_2019	63.0572	DTF
S2A7	G	G	QP-147	Y_2018	71.6108	DTF
S2A7	G	G	QP-147	Y_2019	75.8095	DTF
S2A8	G	G	QP-155	Y_2018	74.2857	DTF
S2A8	G	G	QP-155	Y_2019	82.1429	DTF
S2A9	G	G	QP-163	Y_2018	77.8095	DTF
S2A9	G	G	QP-163	Y_2019	80.2228	DTF
S2B1	G	G	QP-100	Y_2018	67.5714	DTF
S2B1	G	G	QP-100	Y_2019	74.619	DTF
S2B10	G	G	QP-170	Y_2018	68.0952	DTF
S2B10	G	G	QP-170	Y_2019	71.5714	DTF
S2B2	C	C	QP-107	Y_2018	56.8095	DTF
S2B2	C	C	QP-107	Y_2019	60.4762	DTF
S2B3	G	G	QP-115	Y_2018	101.034	DTF
S2B3	G	G	QP-115	Y_2019	101.476	DTF
S2B4	G	G	QP-122	Y_2018	74.3333	DTF
S2B4	G	G	QP-122	Y_2019	77.3979	DTF
S2B5	G	G	QP-130	Y_2019	78.6246	DTF
S2B5	G	G	QP-130	Y_2018	84.4886	DTF
S2B6	G	G	QP-138	Y_2018	52.5238	DTF
S2B6	G	G	QP-138	Y_2019	60.3658	DTF
S2B7	G	G	QP-146	Y_2018	65	DTF
S2B7	G	G	QP-146	Y_2019	74.3043	DTF
S2B8	G	G	QP-154	Y_2018	70.4286	DTF
S2B8	G	G	QP-154	Y_2019	80.0476	DTF
S2B9	G	G	QP-162	Y_2018	73.8099	DTF
S2B9	G	G	QP-162	Y_2019	79.9863	DTF
S2C10	C	C	QP-169	Y_2018	56.2275	DTF
S2C10	C	C	QP-169	Y_2019	61.2853	DTF
S2C2	G	G	QP-106	Y_2018	84.1266	DTF
S2C2	G	G	QP-106	Y_2019	84.7803	DTF
S2C4	G	G	QP-121	Y_2018	64.2413	DTF
S2C4	G	G	QP-121	Y_2019	70.2857	DTF
S2C5	G	G	QP-129	Y_2018	57.5238	DTF
S2C5	G	G	QP-129	Y_2019	63.619	DTF
S2C6	G	G	QP-137	Y_2018	63.3333	DTF
S2C6	G	G	QP-137	Y_2019	64.8571	DTF
S2C7	G	G	QP-145	Y_2018	56.5238	DTF
S2C7	G	G	QP-145	Y_2019	63.4286	DTF
S2C9	G	G	QP-161	Y_2018	57.3636	DTF
S2C9	G	G	QP-161	Y_2019	63.567	DTF
S2D1	C	C	QP-098	Y_2018	61	DTF
S2D1	C	C	QP-098	Y_2019	70.078	DTF
S2D10	G	G	QP-168	Y_2018	72.3472	DTF
S2D10	G	G	QP-168	Y_2019	72.7619	DTF
S2D11	G	G	QP-177	Y_2018	73.1429	DTF
S2D11	G	G	QP-177	Y_2019	81.3333	DTF
S2D3	C	C	QP-113	Y_2018	53.0952	DTF
S2D3	C	C	QP-113	Y_2019	61.1905	DTF
S2D5	G	G	QP-128	Y_2018	50.3333	DTF
S2D5	G	G	QP-128	Y_2019	56.9048	DTF
S2D7	G	G	QP-144	Y_2018	102.838	DTF
S2D7	G	G	QP-144	Y_2019	110.659	DTF
S2D8	G	G	QP-152	Y_2018	51.7619	DTF
S2D8	G	G	QP-152	Y_2019	58.4762	DTF
S2D9	G	G	QP-160	Y_2018	62.4762	DTF
S2D9	G	G	QP-160	Y_2019	68.9048	DTF
S2E1	G	G	QP-097	Y_2018	54.8095	DTF
S2E1	G	G	QP-097	Y_2019	60.2857	DTF
S2E10	G	G	QP-167	Y_2019	74.7333	DTF
S2E10	G	G	QP-167	Y_2018	80.9048	DTF
S2E11	C	C	QP-176	Y_2018	58.9488	DTF
S2E11	C	C	QP-176	Y_2019	63.9738	DTF
S2E3	G	G	QP-112	Y_2018	77.9048	DTF
S2E3	G	G	QP-112	Y_2019	103.155	DTF
S2E5	C	C	QP-127	Y_2018	43.619	DTF
S2E5	C	C	QP-127	Y_2019	54.1429	DTF
S2E6	C	C	QP-135	Y_2018	56.8095	DTF
S2E6	C	C	QP-135	Y_2019	62.4286	DTF
S2E7	G	G	QP-143	Y_2018	70.1905	DTF
S2E7	G	G	QP-143	Y_2019	73.3333	DTF
S2E9	G	G	QP-159	Y_2019	79.6207	DTF
S2E9	G	G	QP-159	Y_2018	84.3779	DTF
S2F1	C	C	QP-096	Y_2018	53.6474	DTF
S2F1	C	C	QP-096	Y_2019	58.4967	DTF
S2F10	G	G	QP-166	Y_2018	73.9405	DTF
S2F10	G	G	QP-166	Y_2019	75.2381	DTF
S2F11	C	C	QP-175	Y_2018	55	DTF
S2F11	C	C	QP-175	Y_2019	59.0476	DTF
S2F2	G	G	QP-104	Y_2018	63	DTF
S2F2	G	G	QP-104	Y_2019	66.4787	DTF
S2F3	G	G	QP-111	Y_2018	55.6555	DTF
S2F3	G	G	QP-111	Y_2019	62.619	DTF
S2F4	C	C	QP-067	Y_2018	67.9524	DTF
S2F4	C	C	QP-067	Y_2019	70.3333	DTF
S2F5	C	C	QP-126	Y_2018	56.619	DTF
S2F5	C	C	QP-126	Y_2019	61.8095	DTF
S2F7	G	G	QP-142	Y_2019	75.2612	DTF
S2F7	G	G	QP-142	Y_2018	76.9524	DTF
S2F8	G	G	QP-150	Y_2018	64.0952	DTF
S2F8	G	G	QP-150	Y_2019	71.1835	DTF
S2G1	G	G	QP-095	Y_2018	54.2381	DTF
S2G1	G	G	QP-095	Y_2019	60.4286	DTF
S2G10	C	C	QP-165	Y_2018	60.0083	DTF
S2G10	C	C	QP-165	Y_2019	65.2381	DTF
S2G11	G	G	QP-174	Y_2018	86.1712	DTF
S2G11	G	G	QP-174	Y_2019	89.8095	DTF
S2G2	C	C	QP-103	Y_2018	47.7619	DTF
S2G2	C	C	QP-103	Y_2019	54.5714	DTF
S2G3	G	G	QP-110	Y_2019	64.017	DTF
S2G3	G	G	QP-110	Y_2018	64.5238	DTF
S2G4	G	G	QP-118	Y_2018	77.781	DTF
S2G4	G	G	QP-118	Y_2019	80.5817	DTF
S2G5	G	G	QP-125	Y_2018	68.9048	DTF
S2G5	G	G	QP-125	Y_2019	73.7207	DTF
S2G6	G	G	QP-133	Y_2018	58.1594	DTF
S2G6	G	G	QP-133	Y_2019	68.686	DTF
S2G8	G	G	QP-149	Y_2018	63.5714	DTF
S2G8	G	G	QP-149	Y_2019	69.8571	DTF
S2G9	G	G	QP-157	Y_2018	58.9342	DTF
S2G9	G	G	QP-157	Y_2019	67.6562	DTF
S2H11	C	C	QP-172	Y_2018	56.5676	DTF
S2H11	C	C	QP-172	Y_2019	62.2381	DTF
S2H2	G	G	QP-102	Y_2018	73.5238	DTF
S2H2	G	G	QP-102	Y_2019	77.8571	DTF
S2H3	C	C	QP-109	Y_2018	56.1429	DTF
S2H3	C	C	QP-109	Y_2019	62.4497	DTF
S2H4	G	G	QP-117	Y_2019	86.4762	DTF
S2H4	G	G	QP-117	Y_2018	91	DTF
S2H5	G	G	QP-124	Y_2018	92.2156	DTF
S2H5	G	G	QP-124	Y_2019	96.8176	DTF
S2H6	G	G	QP-132	Y_2018	79.3129	DTF
S2H6	G	G	QP-132	Y_2019	80.2698	DTF
S2H7	G	G	QP-140	Y_2018	54.0952	DTF
S2H7	G	G	QP-140	Y_2019	59.8787	DTF
S2H8	G	G	QP-148	Y_2018	75.0476	DTF
S2H8	G	G	QP-148	Y_2019	78.8749	DTF
S2H9	G	G	QP-156	Y_2018	68.3101	DTF
S2H9	G	G	QP-156	Y_2019	74.8571	DTF
S3A10	G	G	QP-264	Y_2018	92.0136	DTF
S3A10	G	G	QP-264	Y_2019	95.6227	DTF
S3A3	G	G	QP-208	Y_2019	83.9217	DTF
S3A3	G	G	QP-208	Y_2018	85.4286	DTF
S3A4	G	G	QP-216	Y_2018	88.6566	DTF
S3A4	G	G	QP-216	Y_2019	91.9524	DTF
S3A5	G	G	QP-224	Y_2018	59.4762	DTF
S3A5	G	G	QP-224	Y_2019	67.2381	DTF
S3A6	C	C	QP-232	Y_2018	44.4286	DTF
S3A6	C	C	QP-232	Y_2019	55.4169	DTF
S3A7	C	C	QP-240	Y_2018	66.9048	DTF
S3A7	C	C	QP-240	Y_2019	77.0387	DTF
S3A8	G	G	QP-248	Y_2018	62.1939	DTF
S3A8	G	G	QP-248	Y_2019	68.9184	DTF
S3A9	G	G	QP-256	Y_2018	77.8117	DTF
S3A9	G	G	QP-256	Y_2019	84.7018	DTF
S3B1	G	G	QP-195	Y_2018	66.0476	DTF
S3B1	G	G	QP-195	Y_2019	72.2381	DTF
S3B3	G	G	QP-207	Y_2018	84.4162	DTF
S3B3	G	G	QP-207	Y_2019	87.4286	DTF
S3B4	G	G	QP-215	Y_2018	55.1311	DTF
S3B4	G	G	QP-215	Y_2019	58.9524	DTF
S3B5	G	G	QP-223	Y_2018	96.6841	DTF
S3B5	G	G	QP-223	Y_2019	103.557	DTF
S3B6	G	G	QP-231	Y_2018	47.5238	DTF
S3B6	G	G	QP-231	Y_2019	53.3229	DTF
S3B8	G	G	QP-247	Y_2019	71.964	DTF
S3B8	G	G	QP-247	Y_2018	105.271	DTF
S3B9	G	G	QP-255	Y_2018	56.2381	DTF
S3B9	G	G	QP-255	Y_2019	65.6691	DTF
S3C1	C	C	QP-194	Y_2018	58.4286	DTF
S3C1	C	C	QP-194	Y_2019	66.0789	DTF
S3C10	G	G	QP-262	Y_2018	60.0476	DTF
S3C10	G	G	QP-262	Y_2019	67.7473	DTF
S3C2	G	G	QP-311	Y_2018	79.6667	DTF
S3C2	G	G	QP-311	Y_2019	83	DTF
S3C3	G	G	QP-206	Y_2018	60.619	DTF
S3C3	G	G	QP-206	Y_2019	66.7967	DTF
S3C4	G	G	QP-214	Y_2018	65.0476	DTF
S3C4	G	G	QP-214	Y_2019	68.1905	DTF
S3C5	G	G	QP-222	Y_2018	79.2381	DTF
S3C5	G	G	QP-222	Y_2019	84.8849	DTF
S3C6	G	G	QP-230	Y_2019	92.7867	DTF
S3C6	G	G	QP-230	Y_2018	95.2323	DTF
S3C7	G	G	QP-238	Y_2018	60.8073	DTF
S3C7	G	G	QP-238	Y_2019	64.8638	DTF
S3C8	G	G	QP-246	Y_2018	53.7619	DTF
S3C8	G	G	QP-246	Y_2019	64.8603	DTF
S3D1	G	G	QP-193	Y_2018	70.2077	DTF
S3D1	G	G	QP-193	Y_2019	78.9898	DTF
S3D10	G	G	QP-261	Y_2018	64.9524	DTF
S3D10	G	G	QP-261	Y_2019	68.619	DTF
S3D11	G	G	QP-269	Y_2018	70.9048	DTF
S3D11	G	G	QP-269	Y_2019	73.5883	DTF
S3D3	G	G	QP-205	Y_2018	53.7202	DTF
S3D3	G	G	QP-205	Y_2019	66.1147	DTF
S3D4	G	G	QP-213	Y_2018	60.0952	DTF
S3D4	G	G	QP-213	Y_2019	69.619	DTF
S3D5	G	G	QP-221	Y_2018	84.6651	DTF
S3D5	G	G	QP-221	Y_2019	85.1585	DTF
S3D6	G	G	QP-229	Y_2018	59.0952	DTF
S3D6	G	G	QP-229	Y_2019	67.9774	DTF
S3D7	G	G	QP-237	Y_2018	58.0752	DTF
S3D7	G	G	QP-237	Y_2019	65.3307	DTF
S3D8	G	G	QP-245	Y_2018	66.1429	DTF
S3D8	G	G	QP-245	Y_2019	71.0952	DTF
S3D9	G	G	QP-253	Y_2018	68.381	DTF
S3D9	G	G	QP-253	Y_2019	73.9524	DTF
S3E1	G	G	QP-192	Y_2018	69.7619	DTF
S3E1	G	G	QP-192	Y_2019	73.3339	DTF
S3E10	G	G	QP-260	Y_2018	104.411	DTF
S3E10	G	G	QP-260	Y_2019	108.344	DTF
S3E11	G	G	QP-268	Y_2019	86.0191	DTF
S3E11	G	G	QP-268	Y_2018	94.3333	DTF
S3E3	G	G	QP-204	Y_2018	58.2857	DTF
S3E4	G	G	QP-212	Y_2018	78.2857	DTF
S3E4	G	G	QP-212	Y_2019	86.9636	DTF
S3E5	C	C	QP-220	Y_2018	48.4286	DTF
S3E5	C	C	QP-220	Y_2019	55.9048	DTF
S3E6	G	G	QP-228	Y_2018	89.458	DTF
S3E6	G	G	QP-228	Y_2019	91.6667	DTF
S3E7	G	G	QP-236	Y_2019	87.6174	DTF
S3E7	G	G	QP-236	Y_2018	93.7468	DTF
S3E8	G	G	QP-244	Y_2018	58.0476	DTF
S3E8	G	G	QP-244	Y_2019	65.461	DTF
S3E9	G	G	QP-252	Y_2018	76.4101	DTF
S3E9	G	G	QP-252	Y_2019	78.8889	DTF
S3F1	C	C	QP-191	Y_2019	75.832	DTF
S3F1	C	C	QP-191	Y_2018	83.2588	DTF
S3F10	G	G	QP-259	Y_2018	69.1905	DTF
S3F10	G	G	QP-259	Y_2019	83.3731	DTF
S3F2	G	G	QP-199	Y_2018	68.2027	DTF
S3F2	G	G	QP-199	Y_2019	71.8119	DTF
S3F3	G	G	QP-203	Y_2018	72	DTF
S3F3	G	G	QP-203	Y_2019	78.5136	DTF
S3F4	G	G	QP-211	Y_2019	77.1895	DTF
S3F4	G	G	QP-211	Y_2018	78.3917	DTF
S3F5	G	G	QP-219	Y_2018	75.6667	DTF
S3F5	G	G	QP-219	Y_2019	82.3333	DTF
S3F6	G	G	QP-227	Y_2019	80.0476	DTF
S3F6	G	G	QP-227	Y_2018	85.5366	DTF
S3F7	G	G	QP-235	Y_2018	66	DTF
S3F7	G	G	QP-235	Y_2019	80.8571	DTF
S3F8	G	G	QP-243	Y_2018	69	DTF
S3F8	G	G	QP-243	Y_2019	76.4346	DTF
S3G1	G	G	QP-190	Y_2018	56.3333	DTF
S3G1	G	G	QP-190	Y_2019	63.5238	DTF
S3G3	G	G	QP-202	Y_2018	78.5238	DTF
S3G3	G	G	QP-202	Y_2019	80.2632	DTF
S3G5	G	G	QP-218	Y_2018	65.8571	DTF
S3G5	G	G	QP-218	Y_2019	76	DTF
S3G6	C	C	QP-226	Y_2018	119.33	DTF
S3G6	C	C	QP-226	Y_2019	122.223	DTF
S3G8	G	G	QP-242	Y_2018	61.4762	DTF
S3G8	G	G	QP-242	Y_2019	70.1405	DTF
S3G9	G	G	QP-250	Y_2018	51.4404	DTF
S3H10	G	G	QP-257	Y_2019	83.3314	DTF
S3H10	G	G	QP-257	Y_2018	85.2381	DTF
S3H3	G	G	QP-201	Y_2019	81.0315	DTF
S3H3	G	G	QP-201	Y_2018	81.5714	DTF
S3H4	G	G	QP-209	Y_2018	81.0024	DTF
S3H4	G	G	QP-209	Y_2019	82.6667	DTF
S3H7	G	G	QP-233	Y_2018	49.1298	DTF
S3H7	G	G	QP-233	Y_2019	58.6667	DTF
S3H8	G	G	QP-241	Y_2018	62.4049	DTF
S3H8	G	G	QP-241	Y_2019	65.6667	DTF
S3H9	G	G	QP-249	Y_2018	51.5714	DTF
S3H9	G	G	QP-249	Y_2019	59.6799	DTF
S4A1	G	G	QP-288	Y_2018	77.5514	DTF
S4A1	G	G	QP-288	Y_2019	79.9524	DTF
S4A10	G	G	QP-280	Y_2018	71.1429	DTF
S4A10	G	G	QP-280	Y_2019	75.5641	DTF
S4A2	G	G	QP-296	Y_2019	82.131	DTF
S4A2	G	G	QP-296	Y_2018	82.8825	DTF
S4A3	G	G	QP-304	Y_2018	73.1905	DTF
S4A3	G	G	QP-304	Y_2019	75.6588	DTF
S4A4	G	G	QP-317	Y_2019	70.3626	DTF
S4A4	G	G	QP-317	Y_2018	74.0818	DTF
S4A5	G	G	QP-325	Y_2018	62.1429	DTF
S4A5	G	G	QP-325	Y_2019	66.0476	DTF
S4A7	G	G	QP-084	Y_2018	47.6667	DTF
S4A7	G	G	QP-084	Y_2019	54.7143	DTF
S4A8	G	G	QP-092	Y_2018	80.2131	DTF
S4A8	G	G	QP-092	Y_2019	85.6667	DTF
S4A9	G	G	QP-188	Y_2018	73.0476	DTF
S4A9	G	G	QP-188	Y_2019	80.0833	DTF
S4B1	G	G	QP-287	Y_2019	84.1612	DTF
S4B1	G	G	QP-287	Y_2018	84.3333	DTF
S4B10	G	G	QP-279	Y_2018	56.1619	DTF
S4B10	G	G	QP-279	Y_2019	63.9854	DTF
S4B2	G	G	QP-295	Y_2018	75.9524	DTF
S4B2	G	G	QP-295	Y_2019	87.9048	DTF
S4B4	G	G	QP-316	Y_2018	59.2857	DTF
S4B4	G	G	QP-316	Y_2019	68.6667	DTF
S4B5	G	G	QP-324	Y_2018	68.0952	DTF
S4B5	G	G	QP-324	Y_2019	74.619	DTF
S4B6	C	C	QP-179	Y_2018	48.8571	DTF
S4B6	C	C	QP-179	Y_2019	52.1429	DTF
S4B7	C	C	QP-083	Y_2018	62.4609	DTF
S4B7	C	C	QP-083	Y_2019	68.7143	DTF
S4B8	C	C	QP-091	Y_2018	68.619	DTF
S4B8	C	C	QP-091	Y_2019	76.0624	DTF
S4B9	G	G	QP-187	Y_2018	62.0952	DTF
S4B9	G	G	QP-187	Y_2019	72.5714	DTF
S4C1	G	G	QP-286	Y_2019	77.2278	DTF
S4C1	G	G	QP-286	Y_2018	78.9048	DTF
S4C10	G	G	QP-278	Y_2018	61.0952	DTF
S4C10	G	G	QP-278	Y_2019	68.4762	DTF
S4C2	G	G	QP-294	Y_2019	77.1429	DTF
S4C2	G	G	QP-294	Y_2018	78.619	DTF
S4C3	G	G	QP-302	Y_2018	66.8307	DTF
S4C3	G	G	QP-302	Y_2019	72.8095	DTF
S4C4	G	G	QP-315	Y_2019	79.4015	DTF
S4C4	G	G	QP-315	Y_2018	79.619	DTF
S4C5	G	G	QP-323	Y_2018	70.1611	DTF
S4C5	G	G	QP-323	Y_2019	72.5771	DTF
S4C6	G	G	QP-334	Y_2018	71.6737	DTF
S4C6	G	G	QP-334	Y_2019	72.9635	DTF
S4C7	G	G	QP-082	Y_2019	81.2536	DTF
S4C7	G	G	QP-082	Y_2018	84.0952	DTF
S4C8	C	C	QP-090	Y_2018	57.4286	DTF
S4C8	C	C	QP-090	Y_2019	72.7867	DTF
S4C9	G	G	QP-186	Y_2018	58.2758	DTF
S4C9	G	G	QP-186	Y_2019	68.0879	DTF
S4D1	G	G	QP-285	Y_2018	74.3333	DTF
S4D1	G	G	QP-285	Y_2019	83.8079	DTF
S4D10	G	G	QP-277	Y_2018	63.7879	DTF
S4D10	G	G	QP-277	Y_2019	69.619	DTF
S4D11	G	G	QP-271	Y_2018	81.7143	DTF
S4D11	G	G	QP-271	Y_2019	81.8095	DTF
S4D2	G	G	QP-293	Y_2018	62.1905	DTF
S4D2	G	G	QP-293	Y_2019	69.9012	DTF
S4D3	G	G	QP-301	Y_2018	93.0952	DTF
S4D3	G	G	QP-301	Y_2019	97.8095	DTF
S4D5	G	G	QP-322	Y_2018	41.3577	DTF
S4D5	G	G	QP-322	Y_2019	64.9724	DTF
S4D6	G	G	QP-333	Y_2018	73.9524	DTF
S4D6	G	G	QP-333	Y_2019	80.2536	DTF
S4D7	G	G	QP-328	Y_2018	68.4762	DTF
S4D7	G	G	QP-328	Y_2019	79.619	DTF
S4D8	C	C	QP-089	Y_2018	50.381	DTF
S4D8	C	C	QP-089	Y_2019	56.1353	DTF
S4D9	C	C	QP-185	Y_2018	67.1893	DTF
S4D9	C	C	QP-185	Y_2019	74.2648	DTF
S4E1	G	G	QP-284	Y_2018	68.6504	DTF
S4E1	G	G	QP-284	Y_2019	75.3987	DTF
S4E11	G	G	QP-270	Y_2018	65.5714	DTF
S4E11	G	G	QP-270	Y_2019	69.2446	DTF
S4E2	G	G	QP-292	Y_2018	77.6789	DTF
S4E2	G	G	QP-292	Y_2019	78.8463	DTF
S4E3	G	G	QP-300	Y_2018	85.0971	DTF
S4E3	G	G	QP-300	Y_2019	90.6893	DTF
S4E4	G	G	QP-308	Y_2018	73.5238	DTF
S4E4	G	G	QP-308	Y_2019	81.4063	DTF
S4E5	G	G	QP-321	Y_2018	59.1249	DTF
S4E5	G	G	QP-321	Y_2019	61.3333	DTF
S4E6	G	G	QP-332	Y_2018	70.3483	DTF
S4E6	G	G	QP-332	Y_2019	74.8538	DTF
S4E7	G	G	QP-327	Y_2018	56.9524	DTF
S4E7	G	G	QP-327	Y_2019	67.8541	DTF
S4E8	G	G	QP-088	Y_2019	78.1905	DTF
S4E8	G	G	QP-088	Y_2018	90.4286	DTF
S4E9	G	G	QP-184	Y_2018	72.4969	DTF
S4E9	G	G	QP-184	Y_2019	75.4762	DTF
S4F1	G	G	QP-283	Y_2018	56.6667	DTF
S4F1	G	G	QP-283	Y_2019	62.6978	DTF
S4F10	G	G	QP-275	Y_2018	71.9048	DTF
S4F10	G	G	QP-275	Y_2019	76.4286	DTF
S4F11	C	C	QP-180	Y_2018	64.0952	DTF
S4F11	C	C	QP-180	Y_2019	69.5351	DTF
S4F2	G	G	QP-291	Y_2018	64.7815	DTF
S4F2	G	G	QP-291	Y_2019	71.1869	DTF
S4F3	G	G	QP-299	Y_2018	81.9431	DTF
S4F3	G	G	QP-299	Y_2019	82.1126	DTF
S4F4	G	G	QP-307	Y_2018	66.3333	DTF
S4F4	G	G	QP-307	Y_2019	72.3534	DTF
S4F5	G	G	QP-320	Y_2018	83	DTF
S4F5	G	G	QP-320	Y_2019	85.7729	DTF
S4F6	G	G	QP-331	Y_2018	63.2381	DTF
S4F6	G	G	QP-331	Y_2019	72	DTF
S4F7	G	G	QP-326	Y_2018	52.4506	DTF
S4F7	G	G	QP-326	Y_2019	66.0017	DTF
S4F8	G	G	QP-087	Y_2018	64.4762	DTF
S4F8	G	G	QP-087	Y_2019	72.0617	DTF
S4F9	G	G	QP-183	Y_2018	58.4762	DTF
S4F9	G	G	QP-183	Y_2019	64.4176	DTF
S4G1	G	G	QP-282	Y_2019	76.0753	DTF
S4G1	G	G	QP-282	Y_2018	81.8095	DTF
S4G10	G	G	QP-274	Y_2018	64.3333	DTF
S4G10	G	G	QP-274	Y_2019	69.3914	DTF
S4G2	G	G	QP-290	Y_2018	72	DTF
S4G2	G	G	QP-290	Y_2019	72.5908	DTF
S4G3	G	G	QP-298	Y_2018	99.2193	DTF
S4G3	G	G	QP-298	Y_2019	103.185	DTF
S4G4	G	G	QP-306	Y_2018	72.0914	DTF
S4G4	G	G	QP-306	Y_2019	73.0952	DTF
S4G5	G	G	QP-319	Y_2018	63.5048	DTF
S4G5	G	G	QP-319	Y_2019	69.8722	DTF
S4G6	G	G	QP-330	Y_2019	89.7595	DTF
S4G6	G	G	QP-330	Y_2018	94.1634	DTF
S4G7	G	G	QP-309	Y_2018	73.7619	DTF
S4G7	G	G	QP-309	Y_2019	80.619	DTF
S4G8	C	C	QP-086	Y_2018	56.4286	DTF
S4G8	C	C	QP-086	Y_2019	62.1905	DTF
S4G9	G	G	QP-182	Y_2018	64.0476	DTF
S4G9	G	G	QP-182	Y_2019	71.1111	DTF
S4H1	G	G	QP-281	Y_2018	103.492	DTF
S4H1	G	G	QP-281	Y_2019	104.382	DTF
S4H10	G	G	QP-273	Y_2019	84.9524	DTF
S4H10	G	G	QP-273	Y_2018	85.5016	DTF
S4H11	G	G	QP-178	Y_2018	68.9048	DTF
S4H11	G	G	QP-178	Y_2019	78.5714	DTF
S4H2	G	G	QP-289	Y_2019	74.3418	DTF
S4H2	G	G	QP-289	Y_2018	90.5227	DTF
S4H3	G	G	QP-297	Y_2018	79.5714	DTF
S4H3	G	G	QP-297	Y_2019	84.0476	DTF
S4H4	G	G	QP-305	Y_2018	64.6667	DTF
S4H4	G	G	QP-305	Y_2019	70.578	DTF
S4H5	G	G	QP-318	Y_2019	114.969	DTF
S4H5	G	G	QP-318	Y_2018	120.93	DTF
S4H6	G	G	QP-329	Y_2018	68.381	DTF
S4H6	G	G	QP-329	Y_2019	72.7619	DTF
S4H8	G	G	QP-085	Y_2018	54.7619	DTF
S4H8	G	G	QP-085	Y_2019	61.7619	DTF
S4H9	C	C	QP-181	Y_2018	50.9048	DTF
S4H9	C	C	QP-181	Y_2019	56.3333	DTF
10176	G	G	QP-276	Y_2018	250	DTM
10176	G	G	QP-276	Y_2019	250	DTM
10178	G	G	QP-164	Y_2018	249.999	DTM
10178	G	G	QP-164	Y_2019	249.999	DTM
10183	G	G	QP-345	Y_2019	250	DTM
10183	G	G	QP-345	Y_2018	250	DTM
S1A10	G	G	QP-076	Y_2019	250	DTM
S1A10	G	G	QP-076	Y_2018	250	DTM
S1A2	G	G	QP-014	Y_2019	250	DTM
S1A2	G	G	QP-014	Y_2018	250	DTM
S1A3	G	G	QP-022	Y_2018	250	DTM
S1A3	G	G	QP-022	Y_2019	250	DTM
S1A5	C	C	QP-038	Y_2019	135.667	DTM
S1A5	C	C	QP-038	Y_2018	159.389	DTM
S1A6	C	C	QP-046	Y_2019	133.334	DTM
S1A6	C	C	QP-046	Y_2018	136.876	DTM
S1A8	C	C	QP-061	Y_2019	142.667	DTM
S1A8	C	C	QP-061	Y_2018	159.312	DTM
S1A9	G	G	QP-068	Y_2018	167.194	DTM
S1A9	G	G	QP-068	Y_2019	184.052	DTM
S1B1	C	C	QP-006	Y_2019	131	DTM
S1B1	C	C	QP-006	Y_2018	134.463	DTM
S1B3	C	C	QP-021	Y_2019	219.667	DTM
S1B3	C	C	QP-021	Y_2018	242.739	DTM
S1B4	G	G	QP-029	Y_2018	250	DTM
S1B4	G	G	QP-029	Y_2019	250	DTM
S1B5	G	G	QP-037	Y_2019	250	DTM
S1B5	G	G	QP-037	Y_2018	250.001	DTM
S1B6	C	C	QP-045	Y_2019	189.333	DTM
S1B6	C	C	QP-045	Y_2018	222.333	DTM
S1B8	C	C	QP-060	Y_2019	128.143	DTM
S1B8	C	C	QP-060	Y_2018	142.339	DTM
S1C1	C	C	QP-005	Y_2019	127.001	DTM
S1C1	C	C	QP-005	Y_2018	144.146	DTM
S1C10	G	G	QP-074	Y_2019	250	DTM
S1C10	G	G	QP-074	Y_2018	250	DTM
S1C2	G	G	QP-013	Y_2019	250	DTM
S1C2	G	G	QP-013	Y_2018	250	DTM
S1C3	G	G	QP-020	Y_2019	250	DTM
S1C3	G	G	QP-020	Y_2018	250	DTM
S1C4	G	G	QP-028	Y_2019	250	DTM
S1C4	G	G	QP-028	Y_2018	250	DTM
S1C6	C	C	QP-044	Y_2019	142.667	DTM
S1C6	C	C	QP-044	Y_2018	159.681	DTM
S1C7	G	G	QP-052	Y_2019	250	DTM
S1C7	G	G	QP-052	Y_2018	250.001	DTM
S1C9	C	C	QP-066	Y_2019	144.998	DTM
S1C9	C	C	QP-066	Y_2018	160.333	DTM
S1D1	C	C	QP-004	Y_2019	122.998	DTM
S1D1	C	C	QP-004	Y_2018	132.568	DTM
S1D10	C	C	QP-073	Y_2019	154.333	DTM
S1D10	C	C	QP-073	Y_2018	169.005	DTM
S1D11	G	G	QP-081	Y_2019	250	DTM
S1D11	G	G	QP-081	Y_2018	250	DTM
S1D2	G	G	QP-012	Y_2019	250	DTM
S1D2	G	G	QP-012	Y_2018	250	DTM
S1D3	C	C	QP-019	Y_2019	131	DTM
S1D3	C	C	QP-019	Y_2018	142.173	DTM
S1D4	G	G	QP-027	Y_2019	145	DTM
S1D4	G	G	QP-027	Y_2018	162	DTM
S1D5	C	C	QP-035	Y_2019	131.003	DTM
S1D5	C	C	QP-035	Y_2018	141.286	DTM
S1D6	C	C	QP-043	Y_2019	123.667	DTM
S1D6	C	C	QP-043	Y_2018	140.666	DTM
S1D8	G	G	QP-058	Y_2018	250	DTM
S1D8	G	G	QP-058	Y_2019	250	DTM
S1E1	C	C	QP-003	Y_2019	131	DTM
S1E1	C	C	QP-003	Y_2018	167.299	DTM
S1E11	G	G	QP-080	Y_2019	250	DTM
S1E11	G	G	QP-080	Y_2018	250	DTM
S1E2	G	G	QP-011	Y_2019	250	DTM
S1E2	G	G	QP-011	Y_2018	250	DTM
S1E3	C	C	QP-018	Y_2019	137.998	DTM
S1E3	C	C	QP-018	Y_2018	146.725	DTM
S1E4	C	C	QP-026	Y_2019	135.667	DTM
S1E4	C	C	QP-026	Y_2018	152.93	DTM
S1E5	G	G	QP-034	Y_2019	250	DTM
S1E5	G	G	QP-034	Y_2018	250	DTM
S1E6	C	C	QP-042	Y_2019	126.998	DTM
S1E6	C	C	QP-042	Y_2018	136.959	DTM
S1E8	G	G	QP-057	Y_2019	250	DTM
S1E8	G	G	QP-057	Y_2018	250	DTM
S1E9	C	C	QP-065	Y_2019	121.298	DTM
S1E9	C	C	QP-065	Y_2018	138.829	DTM
S1F1	C	C	QP-002	Y_2019	110.874	DTM
S1F1	C	C	QP-002	Y_2018	133.783	DTM
S1F10	G	G	QP-071	Y_2019	250	DTM
S1F10	G	G	QP-071	Y_2018	250	DTM
S1F11	G	G	QP-079	Y_2019	250	DTM
S1F11	G	G	QP-079	Y_2018	250	DTM
S1F2	G	G	QP-010	Y_2019	250	DTM
S1F2	G	G	QP-010	Y_2018	250	DTM
S1F3	G	G	QP-017	Y_2018	250	DTM
S1F3	G	G	QP-017	Y_2019	250	DTM
S1F4	G	G	QP-025	Y_2018	249.999	DTM
S1F4	G	G	QP-025	Y_2019	250	DTM
S1F5	G	G	QP-033	Y_2019	250	DTM
S1F5	G	G	QP-033	Y_2018	250	DTM
S1F6	C	C	QP-041	Y_2019	131.618	DTM
S1F6	C	C	QP-041	Y_2018	148.341	DTM
S1F7	C	C	QP-049	Y_2019	154.334	DTM
S1F7	C	C	QP-049	Y_2018	199.415	DTM
S1F8	G	G	QP-056	Y_2019	250	DTM
S1F8	G	G	QP-056	Y_2018	250	DTM
S1F9	G	G	QP-064	Y_2019	147.332	DTM
S1F9	G	G	QP-064	Y_2018	158.004	DTM
S1G1	C	C	QP-001	Y_2019	154.333	DTM
S1G1	C	C	QP-001	Y_2018	160	DTM
S1G10	G	G	QP-070	Y_2019	250	DTM
S1G10	G	G	QP-070	Y_2018	250	DTM
S1G11	G	G	QP-078	Y_2019	250	DTM
S1G11	G	G	QP-078	Y_2018	250	DTM
S1G3	G	G	QP-016	Y_2018	166.667	DTM
S1G3	G	G	QP-016	Y_2019	201.374	DTM
S1G4	G	G	QP-024	Y_2019	250	DTM
S1G4	G	G	QP-024	Y_2018	250	DTM
S1G5	C	C	QP-032	Y_2019	123.001	DTM
S1G5	C	C	QP-032	Y_2018	138.262	DTM
S1G6	G	G	QP-040	Y_2019	159.598	DTM
S1G6	G	G	QP-040	Y_2018	250	DTM
S1G7	C	C	QP-048	Y_2019	138	DTM
S1G7	C	C	QP-048	Y_2018	161.997	DTM
S1G8	C	C	QP-055	Y_2019	154.336	DTM
S1G8	C	C	QP-055	Y_2018	155.957	DTM
S1G9	C	C	QP-063	Y_2019	142.667	DTM
S1G9	C	C	QP-063	Y_2018	162.001	DTM
S1H11	G	G	QP-077	Y_2018	250	DTM
S1H11	G	G	QP-077	Y_2019	250.001	DTM
S1H2	G	G	QP-008	Y_2019	250	DTM
S1H2	G	G	QP-008	Y_2018	250	DTM
S1H3	G	G	QP-015	Y_2018	249.999	DTM
S1H3	G	G	QP-015	Y_2019	250	DTM
S1H4	G	G	QP-023	Y_2019	250	DTM
S1H4	G	G	QP-023	Y_2018	250	DTM
S1H5	C	C	QP-030	Y_2018	158.439	DTM
S1H5	C	C	QP-030	Y_2019	159	DTM
S1H6	C	C	QP-039	Y_2018	175.875	DTM
S1H6	C	C	QP-039	Y_2019	184.649	DTM
S1H7	C	C	QP-047	Y_2018	166.335	DTM
S1H8	G	G	QP-054	Y_2019	250	DTM
S1H8	G	G	QP-054	Y_2018	250	DTM
S1H9	C	C	QP-062	Y_2019	152.374	DTM
S1H9	C	C	QP-062	Y_2018	171.338	DTM
S2A1	G	G	QP-101	Y_2019	250	DTM
S2A1	G	G	QP-101	Y_2018	250	DTM
S2A4	C	C	QP-123	Y_2019	141.874	DTM
S2A4	C	C	QP-123	Y_2018	164.327	DTM
S2A5	G	G	QP-131	Y_2019	250	DTM
S2A5	G	G	QP-131	Y_2018	250	DTM
S2A6	C	C	QP-139	Y_2019	119.001	DTM
S2A6	C	C	QP-139	Y_2018	133.406	DTM
S2A7	G	G	QP-147	Y_2018	241.556	DTM
S2A7	G	G	QP-147	Y_2019	250	DTM
S2A8	G	G	QP-155	Y_2019	250	DTM
S2A8	G	G	QP-155	Y_2018	250	DTM
S2A9	G	G	QP-163	Y_2018	250	DTM
S2A9	G	G	QP-163	Y_2019	250	DTM
S2B1	G	G	QP-100	Y_2019	148.874	DTM
S2B1	G	G	QP-100	Y_2018	169.33	DTM
S2B10	G	G	QP-170	Y_2019	250	DTM
S2B10	G	G	QP-170	Y_2018	250	DTM
S2B2	C	C	QP-107	Y_2018	137.126	DTM
S2B2	C	C	QP-107	Y_2019	146.851	DTM
S2B3	G	G	QP-115	Y_2018	250	DTM
S2B3	G	G	QP-115	Y_2019	250	DTM
S2B4	G	G	QP-122	Y_2018	250	DTM
S2B4	G	G	QP-122	Y_2019	250	DTM
S2B5	G	G	QP-130	Y_2019	250	DTM
S2B5	G	G	QP-130	Y_2018	250	DTM
S2B6	G	G	QP-138	Y_2019	250	DTM
S2B6	G	G	QP-138	Y_2018	250	DTM
S2B7	G	G	QP-146	Y_2019	250	DTM
S2B7	G	G	QP-146	Y_2018	250	DTM
S2B8	G	G	QP-154	Y_2019	250	DTM
S2B8	G	G	QP-154	Y_2018	250	DTM
S2B9	G	G	QP-162	Y_2018	250	DTM
S2B9	G	G	QP-162	Y_2019	250	DTM
S2C10	C	C	QP-169	Y_2019	131	DTM
S2C10	C	C	QP-169	Y_2018	142.667	DTM
S2C2	G	G	QP-106	Y_2019	250.001	DTM
S2C2	G	G	QP-106	Y_2018	250.001	DTM
S2C4	G	G	QP-121	Y_2019	250	DTM
S2C4	G	G	QP-121	Y_2018	250.001	DTM
S2C5	G	G	QP-129	Y_2019	250	DTM
S2C5	G	G	QP-129	Y_2018	250	DTM
S2C6	G	G	QP-137	Y_2018	186.802	DTM
S2C6	G	G	QP-137	Y_2019	219.79	DTM
S2C7	G	G	QP-145	Y_2019	250	DTM
S2C7	G	G	QP-145	Y_2018	250	DTM
S2C9	G	G	QP-161	Y_2018	250	DTM
S2C9	G	G	QP-161	Y_2019	250	DTM
S2D1	C	C	QP-098	Y_2019	189.31	DTM
S2D1	C	C	QP-098	Y_2018	222.245	DTM
S2D10	G	G	QP-168	Y_2019	250	DTM
S2D10	G	G	QP-168	Y_2018	250	DTM
S2D11	G	G	QP-177	Y_2019	250	DTM
S2D11	G	G	QP-177	Y_2018	250	DTM
S2D3	C	C	QP-113	Y_2019	131.374	DTM
S2D3	C	C	QP-113	Y_2018	140.167	DTM
S2D5	G	G	QP-128	Y_2018	148.851	DTM
S2D5	G	G	QP-128	Y_2019	175.333	DTM
S2D7	G	G	QP-144	Y_2018	250	DTM
S2D7	G	G	QP-144	Y_2019	250	DTM
S2D8	G	G	QP-152	Y_2019	249.997	DTM
S2D8	G	G	QP-152	Y_2018	250	DTM
S2D9	G	G	QP-160	Y_2019	250	DTM
S2D9	G	G	QP-160	Y_2018	250	DTM
S2E1	G	G	QP-097	Y_2019	150.335	DTM
S2E1	G	G	QP-097	Y_2018	154.675	DTM
S2E10	G	G	QP-167	Y_2018	250	DTM
S2E10	G	G	QP-167	Y_2019	250	DTM
S2E11	C	C	QP-176	Y_2019	143.994	DTM
S2E11	C	C	QP-176	Y_2018	157.667	DTM
S2E3	G	G	QP-112	Y_2019	249.921	DTM
S2E3	G	G	QP-112	Y_2018	250	DTM
S2E5	C	C	QP-127	Y_2018	116.481	DTM
S2E5	C	C	QP-127	Y_2019	123	DTM
S2E6	C	C	QP-135	Y_2018	233.138	DTM
S2E6	C	C	QP-135	Y_2019	250	DTM
S2E7	G	G	QP-143	Y_2019	250	DTM
S2E7	G	G	QP-143	Y_2018	250	DTM
S2E9	G	G	QP-159	Y_2019	250	DTM
S2E9	G	G	QP-159	Y_2018	250	DTM
S2F1	C	C	QP-096	Y_2019	135.672	DTM
S2F1	C	C	QP-096	Y_2018	141.269	DTM
S2F10	G	G	QP-166	Y_2019	250	DTM
S2F10	G	G	QP-166	Y_2018	250.001	DTM
S2F11	C	C	QP-175	Y_2018	146.666	DTM
S2F11	C	C	QP-175	Y_2019	154.333	DTM
S2F2	G	G	QP-104	Y_2019	250	DTM
S2F2	G	G	QP-104	Y_2018	250	DTM
S2F3	G	G	QP-111	Y_2019	147.333	DTM
S2F3	G	G	QP-111	Y_2018	191.977	DTM
S2F4	C	C	QP-067	Y_2018	168.997	DTM
S2F4	C	C	QP-067	Y_2019	189.317	DTM
S2F5	C	C	QP-126	Y_2019	131	DTM
S2F5	C	C	QP-126	Y_2018	144.336	DTM
S2F7	G	G	QP-142	Y_2019	250	DTM
S2F7	G	G	QP-142	Y_2018	250	DTM
S2F8	G	G	QP-150	Y_2019	250	DTM
S2F8	G	G	QP-150	Y_2018	250	DTM
S2G1	G	G	QP-095	Y_2019	152	DTM
S2G1	G	G	QP-095	Y_2018	166.667	DTM
S2G10	C	C	QP-165	Y_2019	149.666	DTM
S2G10	C	C	QP-165	Y_2018	151.071	DTM
S2G11	G	G	QP-174	Y_2018	250	DTM
S2G11	G	G	QP-174	Y_2019	250	DTM
S2G2	C	C	QP-103	Y_2019	119.374	DTM
S2G2	C	C	QP-103	Y_2018	123.124	DTM
S2G3	G	G	QP-110	Y_2019	249.701	DTM
S2G3	G	G	QP-110	Y_2018	250	DTM
S2G4	G	G	QP-118	Y_2019	250	DTM
S2G4	G	G	QP-118	Y_2018	250.001	DTM
S2G5	G	G	QP-125	Y_2019	250	DTM
S2G5	G	G	QP-125	Y_2018	250	DTM
S2G6	G	G	QP-133	Y_2019	144.998	DTM
S2G6	G	G	QP-133	Y_2018	165.889	DTM
S2G8	G	G	QP-149	Y_2019	250	DTM
S2G8	G	G	QP-149	Y_2018	250	DTM
S2G9	G	G	QP-157	Y_2018	249.999	DTM
S2G9	G	G	QP-157	Y_2019	250	DTM
S2H11	C	C	QP-172	Y_2019	142.667	DTM
S2H11	C	C	QP-172	Y_2018	157.655	DTM
S2H2	G	G	QP-102	Y_2019	250	DTM
S2H2	G	G	QP-102	Y_2018	250	DTM
S2H3	C	C	QP-109	Y_2019	135.668	DTM
S2H3	C	C	QP-109	Y_2018	160	DTM
S2H4	G	G	QP-117	Y_2019	250	DTM
S2H4	G	G	QP-117	Y_2018	250	DTM
S2H5	G	G	QP-124	Y_2018	250	DTM
S2H5	G	G	QP-124	Y_2019	250.001	DTM
S2H6	G	G	QP-132	Y_2018	249.999	DTM
S2H6	G	G	QP-132	Y_2019	250	DTM
S2H7	G	G	QP-140	Y_2019	187.321	DTM
S2H7	G	G	QP-140	Y_2018	250	DTM
S2H8	G	G	QP-148	Y_2019	250	DTM
S2H8	G	G	QP-148	Y_2018	250	DTM
S2H9	G	G	QP-156	Y_2019	250	DTM
S2H9	G	G	QP-156	Y_2018	250	DTM
S3A10	G	G	QP-264	Y_2019	250	DTM
S3A10	G	G	QP-264	Y_2018	250	DTM
S3A3	G	G	QP-208	Y_2019	250	DTM
S3A3	G	G	QP-208	Y_2018	250	DTM
S3A4	G	G	QP-216	Y_2018	249.999	DTM
S3A4	G	G	QP-216	Y_2019	250	DTM
S3A5	G	G	QP-224	Y_2019	152.374	DTM
S3A5	G	G	QP-224	Y_2018	164.338	DTM
S3A6	C	C	QP-232	Y_2018	141.84	DTM
S3A6	C	C	QP-232	Y_2019	175.284	DTM
S3A7	C	C	QP-240	Y_2019	250	DTM
S3A7	C	C	QP-240	Y_2018	250	DTM
S3A8	G	G	QP-248	Y_2019	250	DTM
S3A8	G	G	QP-248	Y_2018	250.001	DTM
S3A9	G	G	QP-256	Y_2019	250	DTM
S3A9	G	G	QP-256	Y_2018	250	DTM
S3B1	G	G	QP-195	Y_2019	250	DTM
S3B1	G	G	QP-195	Y_2018	250	DTM
S3B3	G	G	QP-207	Y_2019	250	DTM
S3B3	G	G	QP-207	Y_2018	250	DTM
S3B4	G	G	QP-215	Y_2019	149.667	DTM
S3B4	G	G	QP-215	Y_2018	158.674	DTM
S3B5	G	G	QP-223	Y_2019	250	DTM
S3B5	G	G	QP-223	Y_2018	250	DTM
S3B6	G	G	QP-231	Y_2018	108.888	DTM
S3B6	G	G	QP-231	Y_2019	111	DTM
S3B8	G	G	QP-247	Y_2019	250	DTM
S3B8	G	G	QP-247	Y_2018	250	DTM
S3B9	G	G	QP-255	Y_2019	250	DTM
S3B9	G	G	QP-255	Y_2018	250	DTM
S3C1	C	C	QP-194	Y_2019	138	DTM
S3C1	C	C	QP-194	Y_2018	159.656	DTM
S3C10	G	G	QP-262	Y_2018	250	DTM
S3C10	G	G	QP-262	Y_2019	250	DTM
S3C2	G	G	QP-311	Y_2019	250	DTM
S3C2	G	G	QP-311	Y_2018	250	DTM
S3C3	G	G	QP-206	Y_2019	250	DTM
S3C3	G	G	QP-206	Y_2018	250	DTM
S3C4	G	G	QP-214	Y_2019	250	DTM
S3C4	G	G	QP-214	Y_2018	250	DTM
S3C5	G	G	QP-222	Y_2019	250	DTM
S3C5	G	G	QP-222	Y_2018	250	DTM
S3C6	G	G	QP-230	Y_2019	249.999	DTM
S3C6	G	G	QP-230	Y_2018	250.002	DTM
S3C7	G	G	QP-238	Y_2019	249.999	DTM
S3C7	G	G	QP-238	Y_2018	250	DTM
S3C8	G	G	QP-246	Y_2019	250	DTM
S3C8	G	G	QP-246	Y_2018	250	DTM
S3D1	G	G	QP-193	Y_2018	250	DTM
S3D1	G	G	QP-193	Y_2019	250	DTM
S3D10	G	G	QP-261	Y_2019	250	DTM
S3D10	G	G	QP-261	Y_2018	250	DTM
S3D11	G	G	QP-269	Y_2019	249.999	DTM
S3D11	G	G	QP-269	Y_2018	250	DTM
S3D3	G	G	QP-205	Y_2019	249.998	DTM
S3D3	G	G	QP-205	Y_2018	250.005	DTM
S3D4	G	G	QP-213	Y_2019	149.668	DTM
S3D4	G	G	QP-213	Y_2018	159.656	DTM
S3D5	G	G	QP-221	Y_2019	250	DTM
S3D5	G	G	QP-221	Y_2018	250	DTM
S3D6	G	G	QP-229	Y_2019	142.667	DTM
S3D6	G	G	QP-229	Y_2018	159.667	DTM
S3D7	G	G	QP-237	Y_2018	250.001	DTM
S3D7	G	G	QP-237	Y_2019	250.003	DTM
S3D8	G	G	QP-245	Y_2019	250	DTM
S3D8	G	G	QP-245	Y_2018	250	DTM
S3D9	G	G	QP-253	Y_2019	250	DTM
S3D9	G	G	QP-253	Y_2018	250	DTM
S3E1	G	G	QP-192	Y_2019	250	DTM
S3E1	G	G	QP-192	Y_2018	250	DTM
S3E10	G	G	QP-260	Y_2019	250	DTM
S3E10	G	G	QP-260	Y_2018	250.001	DTM
S3E11	G	G	QP-268	Y_2019	250	DTM
S3E11	G	G	QP-268	Y_2018	250	DTM
S3E3	G	G	QP-204	Y_2018	250	DTM
S3E4	G	G	QP-212	Y_2019	250	DTM
S3E4	G	G	QP-212	Y_2018	250	DTM
S3E5	C	C	QP-220	Y_2018	144.336	DTM
S3E5	C	C	QP-220	Y_2019	161	DTM
S3E6	G	G	QP-228	Y_2019	250	DTM
S3E6	G	G	QP-228	Y_2018	250.001	DTM
S3E7	G	G	QP-236	Y_2019	250	DTM
S3E7	G	G	QP-236	Y_2018	250	DTM
S3E8	G	G	QP-244	Y_2019	250	DTM
S3E8	G	G	QP-244	Y_2018	250	DTM
S3E9	G	G	QP-252	Y_2018	249.999	DTM
S3E9	G	G	QP-252	Y_2019	250	DTM
S3F1	C	C	QP-191	Y_2019	250	DTM
S3F1	C	C	QP-191	Y_2018	250.003	DTM
S3F10	G	G	QP-259	Y_2019	249.999	DTM
S3F10	G	G	QP-259	Y_2018	250	DTM
S3F2	G	G	QP-199	Y_2019	249.999	DTM
S3F2	G	G	QP-199	Y_2018	249.999	DTM
S3F3	G	G	QP-203	Y_2019	250	DTM
S3F3	G	G	QP-203	Y_2018	250	DTM
S3F4	G	G	QP-211	Y_2019	250	DTM
S3F4	G	G	QP-211	Y_2018	250	DTM
S3F5	G	G	QP-219	Y_2019	250	DTM
S3F5	G	G	QP-219	Y_2018	250	DTM
S3F6	G	G	QP-227	Y_2019	250	DTM
S3F6	G	G	QP-227	Y_2018	250.001	DTM
S3F7	G	G	QP-235	Y_2019	250	DTM
S3F7	G	G	QP-235	Y_2018	250	DTM
S3F8	G	G	QP-243	Y_2018	250	DTM
S3F8	G	G	QP-243	Y_2019	250	DTM
S3G1	G	G	QP-190	Y_2019	250	DTM
S3G1	G	G	QP-190	Y_2018	250	DTM
S3G3	G	G	QP-202	Y_2019	250	DTM
S3G3	G	G	QP-202	Y_2018	250	DTM
S3G5	G	G	QP-218	Y_2019	250	DTM
S3G5	G	G	QP-218	Y_2018	250	DTM
S3G6	C	C	QP-226	Y_2019	250	DTM
S3G6	C	C	QP-226	Y_2018	250	DTM
S3G8	G	G	QP-242	Y_2019	250	DTM
S3G8	G	G	QP-242	Y_2018	250	DTM
S3G9	G	G	QP-250	Y_2018	250	DTM
S3H10	G	G	QP-257	Y_2019	250	DTM
S3H10	G	G	QP-257	Y_2018	250.001	DTM
S3H3	G	G	QP-201	Y_2019	250	DTM
S3H3	G	G	QP-201	Y_2018	250	DTM
S3H4	G	G	QP-209	Y_2019	250	DTM
S3H4	G	G	QP-209	Y_2018	250.001	DTM
S3H7	G	G	QP-233	Y_2019	133.334	DTM
S3H7	G	G	QP-233	Y_2018	144.33	DTM
S3H8	G	G	QP-241	Y_2018	250	DTM
S3H8	G	G	QP-241	Y_2019	250	DTM
S3H9	G	G	QP-249	Y_2019	249.999	DTM
S3H9	G	G	QP-249	Y_2018	250	DTM
S4A1	G	G	QP-288	Y_2018	250	DTM
S4A1	G	G	QP-288	Y_2019	250	DTM
S4A10	G	G	QP-280	Y_2019	250	DTM
S4A10	G	G	QP-280	Y_2018	250	DTM
S4A2	G	G	QP-296	Y_2018	249.999	DTM
S4A2	G	G	QP-296	Y_2019	250	DTM
S4A3	G	G	QP-304	Y_2019	250	DTM
S4A3	G	G	QP-304	Y_2018	250	DTM
S4A4	G	G	QP-317	Y_2018	249.999	DTM
S4A4	G	G	QP-317	Y_2019	250	DTM
S4A5	G	G	QP-325	Y_2019	250	DTM
S4A5	G	G	QP-325	Y_2018	250	DTM
S4A7	G	G	QP-084	Y_2019	130.702	DTM
S4A7	G	G	QP-084	Y_2018	135.683	DTM
S4A8	G	G	QP-092	Y_2019	250	DTM
S4A8	G	G	QP-092	Y_2018	250.001	DTM
S4A9	G	G	QP-188	Y_2019	250	DTM
S4A9	G	G	QP-188	Y_2018	250	DTM
S4B1	G	G	QP-287	Y_2019	250	DTM
S4B1	G	G	QP-287	Y_2018	250	DTM
S4B10	G	G	QP-279	Y_2018	250.001	DTM
S4B10	G	G	QP-279	Y_2019	250.002	DTM
S4B2	G	G	QP-295	Y_2019	250	DTM
S4B2	G	G	QP-295	Y_2018	250	DTM
S4B3	C	C	QP-272	Y_2019	250	DTM
S4B3	C	C	QP-272	Y_2018	250	DTM
S4B4	G	G	QP-316	Y_2019	250	DTM
S4B4	G	G	QP-316	Y_2018	250	DTM
S4B5	G	G	QP-324	Y_2019	250	DTM
S4B5	G	G	QP-324	Y_2018	250.001	DTM
S4B6	C	C	QP-179	Y_2019	117.669	DTM
S4B6	C	C	QP-179	Y_2018	171.57	DTM
S4B7	C	C	QP-083	Y_2018	167.111	DTM
S4B7	C	C	QP-083	Y_2019	186.968	DTM
S4B8	C	C	QP-091	Y_2019	142.688	DTM
S4B8	C	C	QP-091	Y_2018	163.419	DTM
S4B9	G	G	QP-187	Y_2019	250	DTM
S4B9	G	G	QP-187	Y_2018	250	DTM
S4C1	G	G	QP-286	Y_2019	250	DTM
S4C1	G	G	QP-286	Y_2018	250	DTM
S4C10	G	G	QP-278	Y_2019	250	DTM
S4C10	G	G	QP-278	Y_2018	250	DTM
S4C2	G	G	QP-294	Y_2019	250	DTM
S4C2	G	G	QP-294	Y_2018	250	DTM
S4C3	G	G	QP-302	Y_2018	250	DTM
S4C3	G	G	QP-302	Y_2019	250	DTM
S4C4	G	G	QP-315	Y_2019	250	DTM
S4C4	G	G	QP-315	Y_2018	250	DTM
S4C5	G	G	QP-323	Y_2018	250	DTM
S4C5	G	G	QP-323	Y_2019	250	DTM
S4C6	G	G	QP-334	Y_2018	249.999	DTM
S4C6	G	G	QP-334	Y_2019	250	DTM
S4C7	G	G	QP-082	Y_2019	250	DTM
S4C7	G	G	QP-082	Y_2018	250	DTM
S4C8	C	C	QP-090	Y_2019	142.662	DTM
S4C8	C	C	QP-090	Y_2018	162.33	DTM
S4C9	G	G	QP-186	Y_2019	249.999	DTM
S4C9	G	G	QP-186	Y_2018	250	DTM
S4D1	G	G	QP-285	Y_2018	250	DTM
S4D1	G	G	QP-285	Y_2019	250.15	DTM
S4D10	G	G	QP-277	Y_2018	249.999	DTM
S4D10	G	G	QP-277	Y_2019	250	DTM
S4D11	G	G	QP-271	Y_2019	250	DTM
S4D11	G	G	QP-271	Y_2018	250	DTM
S4D2	G	G	QP-293	Y_2019	250	DTM
S4D2	G	G	QP-293	Y_2018	250	DTM
S4D3	G	G	QP-301	Y_2019	250	DTM
S4D3	G	G	QP-301	Y_2018	250	DTM
S4D5	G	G	QP-322	Y_2019	250	DTM
S4D5	G	G	QP-322	Y_2018	250.001	DTM
S4D6	G	G	QP-333	Y_2018	250	DTM
S4D6	G	G	QP-333	Y_2019	250.002	DTM
S4D7	G	G	QP-328	Y_2019	250	DTM
S4D7	G	G	QP-328	Y_2018	250	DTM
S4D8	C	C	QP-089	Y_2019	117.667	DTM
S4D8	C	C	QP-089	Y_2018	120.7	DTM
S4D9	C	C	QP-185	Y_2019	250	DTM
S4D9	C	C	QP-185	Y_2018	250.001	DTM
S4E1	G	G	QP-284	Y_2019	250	DTM
S4E1	G	G	QP-284	Y_2018	250	DTM
S4E11	G	G	QP-270	Y_2018	250	DTM
S4E11	G	G	QP-270	Y_2019	250	DTM
S4E2	G	G	QP-292	Y_2018	250	DTM
S4E2	G	G	QP-292	Y_2019	250	DTM
S4E3	G	G	QP-300	Y_2019	249.999	DTM
S4E3	G	G	QP-300	Y_2018	250	DTM
S4E4	G	G	QP-308	Y_2019	250	DTM
S4E4	G	G	QP-308	Y_2018	250	DTM
S4E5	G	G	QP-321	Y_2019	250	DTM
S4E5	G	G	QP-321	Y_2018	250	DTM
S4E6	G	G	QP-332	Y_2018	250	DTM
S4E6	G	G	QP-332	Y_2019	250	DTM
S4E7	G	G	QP-327	Y_2018	250	DTM
S4E7	G	G	QP-327	Y_2019	250	DTM
S4E8	G	G	QP-088	Y_2019	250	DTM
S4E8	G	G	QP-088	Y_2018	250	DTM
S4E9	G	G	QP-184	Y_2019	250	DTM
S4E9	G	G	QP-184	Y_2018	250.001	DTM
S4F1	G	G	QP-283	Y_2019	250	DTM
S4F1	G	G	QP-283	Y_2018	250	DTM
S4F10	G	G	QP-275	Y_2019	250	DTM
S4F10	G	G	QP-275	Y_2018	250	DTM
S4F11	C	C	QP-180	Y_2019	147.334	DTM
S4F11	C	C	QP-180	Y_2018	166.679	DTM
S4F2	G	G	QP-291	Y_2018	250	DTM
S4F2	G	G	QP-291	Y_2019	250	DTM
S4F3	G	G	QP-299	Y_2019	249.999	DTM
S4F3	G	G	QP-299	Y_2018	250	DTM
S4F4	G	G	QP-307	Y_2019	250	DTM
S4F4	G	G	QP-307	Y_2018	250	DTM
S4F5	G	G	QP-320	Y_2019	250	DTM
S4F5	G	G	QP-320	Y_2018	250	DTM
S4F6	G	G	QP-331	Y_2019	250	DTM
S4F6	G	G	QP-331	Y_2018	250	DTM
S4F7	G	G	QP-326	Y_2019	250	DTM
S4F7	G	G	QP-326	Y_2018	250	DTM
S4F8	G	G	QP-087	Y_2019	151.998	DTM
S4F8	G	G	QP-087	Y_2018	198.29	DTM
S4F9	G	G	QP-183	Y_2019	250	DTM
S4F9	G	G	QP-183	Y_2018	250	DTM
S4G1	G	G	QP-282	Y_2019	250	DTM
S4G1	G	G	QP-282	Y_2018	250	DTM
S4G10	G	G	QP-274	Y_2019	250	DTM
S4G10	G	G	QP-274	Y_2018	250	DTM
S4G2	G	G	QP-290	Y_2018	250	DTM
S4G2	G	G	QP-290	Y_2019	250.002	DTM
S4G3	G	G	QP-298	Y_2018	250	DTM
S4G3	G	G	QP-298	Y_2019	250	DTM
S4G4	G	G	QP-306	Y_2019	250	DTM
S4G4	G	G	QP-306	Y_2018	250	DTM
S4G5	G	G	QP-319	Y_2019	250.001	DTM
S4G5	G	G	QP-319	Y_2018	250.002	DTM
S4G6	G	G	QP-330	Y_2018	249.945	DTM
S4G6	G	G	QP-330	Y_2019	250	DTM
S4G7	G	G	QP-309	Y_2019	250	DTM
S4G7	G	G	QP-309	Y_2018	250	DTM
S4G8	C	C	QP-086	Y_2019	138	DTM
S4G8	C	C	QP-086	Y_2018	157.671	DTM
S4G9	G	G	QP-182	Y_2019	250	DTM
S4G9	G	G	QP-182	Y_2018	250	DTM
S4H1	G	G	QP-281	Y_2019	250	DTM
S4H1	G	G	QP-281	Y_2018	250	DTM
S4H10	G	G	QP-273	Y_2019	250	DTM
S4H10	G	G	QP-273	Y_2018	250	DTM
S4H11	G	G	QP-178	Y_2019	250	DTM
S4H11	G	G	QP-178	Y_2018	250	DTM
S4H2	G	G	QP-289	Y_2019	250	DTM
S4H2	G	G	QP-289	Y_2018	250	DTM
S4H3	G	G	QP-297	Y_2019	250	DTM
S4H3	G	G	QP-297	Y_2018	250	DTM
S4H4	G	G	QP-305	Y_2019	250	DTM
S4H4	G	G	QP-305	Y_2018	250	DTM
S4H5	G	G	QP-318	Y_2019	250	DTM
S4H5	G	G	QP-318	Y_2018	250	DTM
S4H6	G	G	QP-329	Y_2019	250	DTM
S4H6	G	G	QP-329	Y_2018	250	DTM
S4H8	G	G	QP-085	Y_2019	250	DTM
S4H8	G	G	QP-085	Y_2018	250	DTM
S4H9	C	C	QP-181	Y_2019	135.67	DTM
S4H9	C	C	QP-181	Y_2018	155.008	DTM
10176	G	G	QP-276	Y_2018	191.696	PH
10176	G	G	QP-276	Y_2019	219.79	PH
10178	G	G	QP-164	Y_2019	183.151	PH
10178	G	G	QP-164	Y_2018	190.258	PH
S1A10	G	G	QP-076	Y_2019	179.462	PH
S1A10	G	G	QP-076	Y_2018	185.073	PH
S1A2	G	G	QP-014	Y_2018	222.786	PH
S1A2	G	G	QP-014	Y_2019	236.619	PH
S1A3	G	G	QP-022	Y_2019	126.167	PH
S1A3	G	G	QP-022	Y_2018	175.22	PH
S1A5	C	C	QP-038	Y_2018	141.111	PH
S1A5	C	C	QP-038	Y_2019	152.429	PH
S1A6	C	C	QP-046	Y_2019	127.447	PH
S1A6	C	C	QP-046	Y_2018	135.279	PH
S1A8	C	C	QP-061	Y_2018	128.491	PH
S1A8	C	C	QP-061	Y_2019	161.333	PH
S1A9	G	G	QP-068	Y_2018	142.127	PH
S1A9	G	G	QP-068	Y_2019	162.982	PH
S1B1	C	C	QP-006	Y_2018	117.593	PH
S1B1	C	C	QP-006	Y_2019	138.117	PH
S1B3	C	C	QP-021	Y_2018	155.091	PH
S1B3	C	C	QP-021	Y_2019	175.81	PH
S1B4	G	G	QP-029	Y_2018	125.333	PH
S1B4	G	G	QP-029	Y_2019	140.998	PH
S1B5	G	G	QP-037	Y_2018	181.59	PH
S1B5	G	G	QP-037	Y_2019	209	PH
S1B6	C	C	QP-045	Y_2018	134.111	PH
S1B6	C	C	QP-045	Y_2019	135.286	PH
S1B8	C	C	QP-060	Y_2019	91.1905	PH
S1B8	C	C	QP-060	Y_2018	100.908	PH
S1C1	C	C	QP-005	Y_2018	112.527	PH
S1C1	C	C	QP-005	Y_2019	131.831	PH
S1C10	G	G	QP-074	Y_2019	160.791	PH
S1C10	G	G	QP-074	Y_2018	188.584	PH
S1C2	G	G	QP-013	Y_2019	165.822	PH
S1C2	G	G	QP-013	Y_2018	166.63	PH
S1C3	G	G	QP-020	Y_2019	148.679	PH
S1C3	G	G	QP-020	Y_2018	157.56	PH
S1C4	G	G	QP-028	Y_2018	156.333	PH
S1C4	G	G	QP-028	Y_2019	176.429	PH
S1C6	C	C	QP-044	Y_2019	108.143	PH
S1C6	C	C	QP-044	Y_2018	122.762	PH
S1C7	G	G	QP-052	Y_2019	171.333	PH
S1C7	G	G	QP-052	Y_2018	173.247	PH
S1C9	C	C	QP-066	Y_2018	128.22	PH
S1C9	C	C	QP-066	Y_2019	160.009	PH
S1D1	C	C	QP-004	Y_2018	97.8342	PH
S1D1	C	C	QP-004	Y_2019	124.836	PH
S1D10	C	C	QP-073	Y_2018	129.797	PH
S1D10	C	C	QP-073	Y_2019	141.905	PH
S1D11	G	G	QP-081	Y_2018	144.411	PH
S1D11	G	G	QP-081	Y_2019	171.106	PH
S1D2	G	G	QP-012	Y_2019	159.857	PH
S1D2	G	G	QP-012	Y_2018	186.744	PH
S1D3	C	C	QP-019	Y_2018	130.649	PH
S1D3	C	C	QP-019	Y_2019	147.821	PH
S1D4	G	G	QP-027	Y_2018	122.667	PH
S1D4	G	G	QP-027	Y_2019	139.714	PH
S1D5	C	C	QP-035	Y_2018	97.3936	PH
S1D5	C	C	QP-035	Y_2019	120.986	PH
S1D6	C	C	QP-043	Y_2018	126.907	PH
S1D6	C	C	QP-043	Y_2019	139.333	PH
S1D8	G	G	QP-058	Y_2018	231.163	PH
S1D8	G	G	QP-058	Y_2019	232.014	PH
S1E1	C	C	QP-003	Y_2018	85.1959	PH
S1E1	C	C	QP-003	Y_2019	98.6658	PH
S1E11	G	G	QP-080	Y_2019	167.912	PH
S1E11	G	G	QP-080	Y_2018	191.984	PH
S1E2	G	G	QP-011	Y_2019	199.476	PH
S1E2	G	G	QP-011	Y_2018	208.177	PH
S1E3	C	C	QP-018	Y_2018	141.213	PH
S1E3	C	C	QP-018	Y_2019	172.949	PH
S1E4	C	C	QP-026	Y_2018	131.792	PH
S1E4	C	C	QP-026	Y_2019	145.857	PH
S1E5	G	G	QP-034	Y_2019	168	PH
S1E5	G	G	QP-034	Y_2018	191.116	PH
S1E6	C	C	QP-042	Y_2019	130.119	PH
S1E6	C	C	QP-042	Y_2018	133.819	PH
S1E8	G	G	QP-057	Y_2019	157.143	PH
S1E8	G	G	QP-057	Y_2018	196.677	PH
S1E9	C	C	QP-065	Y_2018	75.4118	PH
S1E9	C	C	QP-065	Y_2019	98.8372	PH
S1F1	C	C	QP-002	Y_2018	93.9406	PH
S1F1	C	C	QP-002	Y_2019	111.931	PH
S1F10	G	G	QP-071	Y_2019	161.476	PH
S1F10	G	G	QP-071	Y_2018	169.451	PH
S1F11	G	G	QP-079	Y_2019	213.556	PH
S1F11	G	G	QP-079	Y_2018	221.494	PH
S1F2	G	G	QP-010	Y_2019	148.747	PH
S1F2	G	G	QP-010	Y_2018	184.643	PH
S1F3	G	G	QP-017	Y_2019	184	PH
S1F3	G	G	QP-017	Y_2018	193.163	PH
S1F4	G	G	QP-025	Y_2019	185.476	PH
S1F4	G	G	QP-025	Y_2018	193.875	PH
S1F5	G	G	QP-033	Y_2018	220.805	PH
S1F5	G	G	QP-033	Y_2019	237	PH
S1F6	C	C	QP-041	Y_2019	94.3225	PH
S1F6	C	C	QP-041	Y_2018	95.4209	PH
S1F7	C	C	QP-049	Y_2018	171.633	PH
S1F7	C	C	QP-049	Y_2019	191.164	PH
S1F8	G	G	QP-056	Y_2018	131.082	PH
S1F8	G	G	QP-056	Y_2019	142.772	PH
S1F9	G	G	QP-064	Y_2018	124.067	PH
S1F9	G	G	QP-064	Y_2019	146.45	PH
S1G1	C	C	QP-001	Y_2018	137.663	PH
S1G1	C	C	QP-001	Y_2019	164.462	PH
S1G10	G	G	QP-070	Y_2018	191.825	PH
S1G10	G	G	QP-070	Y_2019	197.208	PH
S1G11	G	G	QP-078	Y_2019	161.952	PH
S1G11	G	G	QP-078	Y_2018	175.278	PH
S1G3	G	G	QP-016	Y_2018	150.99	PH
S1G3	G	G	QP-016	Y_2019	160.717	PH
S1G4	G	G	QP-024	Y_2019	153.905	PH
S1G4	G	G	QP-024	Y_2018	185.266	PH
S1G5	C	C	QP-032	Y_2018	130.5	PH
S1G5	C	C	QP-032	Y_2019	134.664	PH
S1G6	G	G	QP-040	Y_2019	113.499	PH
S1G6	G	G	QP-040	Y_2018	136.38	PH
S1G7	C	C	QP-048	Y_2018	149.374	PH
S1G7	C	C	QP-048	Y_2019	165.952	PH
S1G8	C	C	QP-055	Y_2018	130.828	PH
S1G8	C	C	QP-055	Y_2019	157.74	PH
S1G9	C	C	QP-063	Y_2019	161.762	PH
S1G9	C	C	QP-063	Y_2018	165.123	PH
S1H11	G	G	QP-077	Y_2018	147.744	PH
S1H11	G	G	QP-077	Y_2019	181.753	PH
S1H2	G	G	QP-008	Y_2018	131.926	PH
S1H2	G	G	QP-008	Y_2019	136.443	PH
S1H3	G	G	QP-015	Y_2019	177.648	PH
S1H3	G	G	QP-015	Y_2018	181.971	PH
S1H4	G	G	QP-023	Y_2019	142.143	PH
S1H4	G	G	QP-023	Y_2018	179.567	PH
S1H6	C	C	QP-039	Y_2018	146.345	PH
S1H6	C	C	QP-039	Y_2019	163.941	PH
S1H7	C	C	QP-047	Y_2018	161.227	PH
S1H8	G	G	QP-054	Y_2019	150.524	PH
S1H8	G	G	QP-054	Y_2018	176.963	PH
S1H9	C	C	QP-062	Y_2019	160.146	PH
S1H9	C	C	QP-062	Y_2018	165.744	PH
S2A1	G	G	QP-101	Y_2019	217.381	PH
S2A1	G	G	QP-101	Y_2018	232.886	PH
S2A4	C	C	QP-123	Y_2018	143.858	PH
S2A4	C	C	QP-123	Y_2019	153.574	PH
S2A5	G	G	QP-131	Y_2019	165.526	PH
S2A5	G	G	QP-131	Y_2018	185.918	PH
S2A6	C	C	QP-139	Y_2018	92.6584	PH
S2A6	C	C	QP-139	Y_2019	104.926	PH
S2A7	G	G	QP-147	Y_2018	176.333	PH
S2A7	G	G	QP-147	Y_2019	188.81	PH
S2A8	G	G	QP-155	Y_2019	223.238	PH
S2A8	G	G	QP-155	Y_2018	236.311	PH
S2A9	G	G	QP-163	Y_2018	167.217	PH
S2A9	G	G	QP-163	Y_2019	173.651	PH
S2B1	G	G	QP-100	Y_2018	158.143	PH
S2B1	G	G	QP-100	Y_2019	167.003	PH
S2B10	G	G	QP-170	Y_2019	143.166	PH
S2B10	G	G	QP-170	Y_2018	155.896	PH
S2B2	C	C	QP-107	Y_2018	98.8975	PH
S2B2	C	C	QP-107	Y_2019	109.012	PH
S2B3	G	G	QP-115	Y_2018	215.833	PH
S2B3	G	G	QP-115	Y_2019	225.19	PH
S2B4	G	G	QP-122	Y_2018	177.46	PH
S2B4	G	G	QP-122	Y_2019	178.522	PH
S2B5	G	G	QP-130	Y_2019	187.217	PH
S2B5	G	G	QP-130	Y_2018	195.731	PH
S2B6	G	G	QP-138	Y_2019	134.455	PH
S2B6	G	G	QP-138	Y_2018	185.776	PH
S2B7	G	G	QP-146	Y_2019	187.381	PH
S2B7	G	G	QP-146	Y_2018	208.214	PH
S2B8	G	G	QP-154	Y_2018	209.6	PH
S2B8	G	G	QP-154	Y_2019	220.333	PH
S2B9	G	G	QP-162	Y_2018	175.194	PH
S2B9	G	G	QP-162	Y_2019	195.646	PH
S2C10	C	C	QP-169	Y_2018	127.889	PH
S2C10	C	C	QP-169	Y_2019	144.441	PH
S2C2	G	G	QP-106	Y_2018	177.501	PH
S2C2	G	G	QP-106	Y_2019	189.971	PH
S2C4	G	G	QP-121	Y_2019	177.168	PH
S2C4	G	G	QP-121	Y_2018	180.921	PH
S2C5	G	G	QP-129	Y_2019	126.829	PH
S2C5	G	G	QP-129	Y_2018	160.534	PH
S2C6	G	G	QP-137	Y_2018	169.422	PH
S2C6	G	G	QP-137	Y_2019	188.746	PH
S2C7	G	G	QP-145	Y_2019	133.626	PH
S2C7	G	G	QP-145	Y_2018	167.698	PH
S2C9	G	G	QP-161	Y_2019	144.988	PH
S2C9	G	G	QP-161	Y_2018	184.167	PH
S2D1	C	C	QP-098	Y_2018	155.264	PH
S2D1	C	C	QP-098	Y_2019	179.202	PH
S2D10	G	G	QP-168	Y_2019	132.905	PH
S2D10	G	G	QP-168	Y_2018	153.833	PH
S2D11	G	G	QP-177	Y_2019	232.333	PH
S2D11	G	G	QP-177	Y_2018	243.006	PH
S2D3	C	C	QP-113	Y_2018	135.372	PH
S2D3	C	C	QP-113	Y_2019	156.789	PH
S2D5	G	G	QP-128	Y_2018	125.799	PH
S2D5	G	G	QP-128	Y_2019	137.095	PH
S2D7	G	G	QP-144	Y_2018	188.574	PH
S2D7	G	G	QP-144	Y_2019	230.005	PH
S2D8	G	G	QP-152	Y_2019	130.531	PH
S2D8	G	G	QP-152	Y_2018	146.008	PH
S2D9	G	G	QP-160	Y_2018	174.813	PH
S2D9	G	G	QP-160	Y_2019	193.162	PH
S2E1	G	G	QP-097	Y_2018	125.482	PH
S2E1	G	G	QP-097	Y_2019	133.62	PH
S2E10	G	G	QP-167	Y_2018	213.588	PH
S2E10	G	G	QP-167	Y_2019	231.347	PH
S2E11	C	C	QP-176	Y_2019	151.554	PH
S2E11	C	C	QP-176	Y_2018	158.667	PH
S2E3	G	G	QP-112	Y_2019	73.6578	PH
S2E3	G	G	QP-112	Y_2018	167.875	PH
S2E5	C	C	QP-127	Y_2018	77.819	PH
S2E5	C	C	QP-127	Y_2019	92.6667	PH
S2E6	C	C	QP-135	Y_2018	155.948	PH
S2E6	C	C	QP-135	Y_2019	166.184	PH
S2E7	G	G	QP-143	Y_2019	184.667	PH
S2E7	G	G	QP-143	Y_2018	192.691	PH
S2E9	G	G	QP-159	Y_2019	169.286	PH
S2E9	G	G	QP-159	Y_2018	187.248	PH
S2F1	C	C	QP-096	Y_2018	119.86	PH
S2F1	C	C	QP-096	Y_2019	153.29	PH
S2F10	G	G	QP-166	Y_2019	195.381	PH
S2F10	G	G	QP-166	Y_2018	210.799	PH
S2F11	C	C	QP-175	Y_2019	130.333	PH
S2F11	C	C	QP-175	Y_2018	134.57	PH
S2F2	G	G	QP-104	Y_2018	202.48	PH
S2F2	G	G	QP-104	Y_2019	213.611	PH
S2F3	G	G	QP-111	Y_2018	139.25	PH
S2F3	G	G	QP-111	Y_2019	157.619	PH
S2F4	C	C	QP-067	Y_2018	157.796	PH
S2F4	C	C	QP-067	Y_2019	182.447	PH
S2F5	C	C	QP-126	Y_2018	139.056	PH
S2F5	C	C	QP-126	Y_2019	153.762	PH
S2F7	G	G	QP-142	Y_2019	196.238	PH
S2F7	G	G	QP-142	Y_2018	212.05	PH
S2F8	G	G	QP-150	Y_2018	199.032	PH
S2F8	G	G	QP-150	Y_2019	203.732	PH
S2G1	G	G	QP-095	Y_2018	158.596	PH
S2G1	G	G	QP-095	Y_2019	179.333	PH
S2G10	C	C	QP-165	Y_2018	122.215	PH
S2G10	C	C	QP-165	Y_2019	124.498	PH
S2G11	G	G	QP-174	Y_2018	258.5	PH
S2G11	G	G	QP-174	Y_2019	274.143	PH
S2G2	C	C	QP-103	Y_2018	69.7634	PH
S2G2	C	C	QP-103	Y_2019	97.9063	PH
S2G3	G	G	QP-110	Y_2019	190.452	PH
S2G3	G	G	QP-110	Y_2018	211.595	PH
S2G4	G	G	QP-118	Y_2018	151.739	PH
S2G4	G	G	QP-118	Y_2019	199.611	PH
S2G5	G	G	QP-125	Y_2019	184.011	PH
S2G5	G	G	QP-125	Y_2018	215.497	PH
S2G6	G	G	QP-133	Y_2018	169.222	PH
S2G6	G	G	QP-133	Y_2019	214.691	PH
S2G8	G	G	QP-149	Y_2019	110.47	PH
S2G8	G	G	QP-149	Y_2018	142.811	PH
S2G9	G	G	QP-157	Y_2019	147.778	PH
S2G9	G	G	QP-157	Y_2018	179.394	PH
S2H11	C	C	QP-172	Y_2018	137.343	PH
S2H11	C	C	QP-172	Y_2019	148.714	PH
S2H2	G	G	QP-102	Y_2018	207.716	PH
S2H2	G	G	QP-102	Y_2019	217.905	PH
S2H3	C	C	QP-109	Y_2019	155.738	PH
S2H3	C	C	QP-109	Y_2018	158.722	PH
S2H4	G	G	QP-117	Y_2018	223.037	PH
S2H4	G	G	QP-117	Y_2019	240.238	PH
S2H5	G	G	QP-124	Y_2019	157.588	PH
S2H5	G	G	QP-124	Y_2018	183.58	PH
S2H6	G	G	QP-132	Y_2019	149.722	PH
S2H6	G	G	QP-132	Y_2018	150.303	PH
S2H7	G	G	QP-140	Y_2018	121.771	PH
S2H7	G	G	QP-140	Y_2019	142.056	PH
S2H8	G	G	QP-148	Y_2019	219.608	PH
S2H8	G	G	QP-148	Y_2018	234.895	PH
S2H9	G	G	QP-156	Y_2019	223.857	PH
S2H9	G	G	QP-156	Y_2018	225.072	PH
S3A10	G	G	QP-264	Y_2019	260.667	PH
S3A10	G	G	QP-264	Y_2018	297.138	PH
S3A3	G	G	QP-208	Y_2018	222.237	PH
S3A3	G	G	QP-208	Y_2019	222.898	PH
S3A4	G	G	QP-216	Y_2018	203.72	PH
S3A4	G	G	QP-216	Y_2019	229.762	PH
S3A5	G	G	QP-224	Y_2018	147.425	PH
S3A5	G	G	QP-224	Y_2019	197.146	PH
S3A6	C	C	QP-232	Y_2018	109.048	PH
S3A6	C	C	QP-232	Y_2019	125.897	PH
S3A7	C	C	QP-240	Y_2018	190.606	PH
S3A7	C	C	QP-240	Y_2019	211.794	PH
S3A8	G	G	QP-248	Y_2019	122.807	PH
S3A8	G	G	QP-248	Y_2018	140.091	PH
S3A9	G	G	QP-256	Y_2018	209.588	PH
S3A9	G	G	QP-256	Y_2019	215.81	PH
S3B1	G	G	QP-195	Y_2018	220.944	PH
S3B1	G	G	QP-195	Y_2019	232.988	PH
S3B3	G	G	QP-207	Y_2018	188.335	PH
S3B3	G	G	QP-207	Y_2019	211.952	PH
S3B4	G	G	QP-215	Y_2018	129.661	PH
S3B4	G	G	QP-215	Y_2019	156	PH
S3B5	G	G	QP-223	Y_2019	205.116	PH
S3B5	G	G	QP-223	Y_2018	220.833	PH
S3B6	G	G	QP-231	Y_2018	65.2946	PH
S3B6	G	G	QP-231	Y_2019	101.441	PH
S3B8	G	G	QP-247	Y_2019	198.025	PH
S3B8	G	G	QP-247	Y_2018	202.997	PH
S3B9	G	G	QP-255	Y_2019	155.238	PH
S3B9	G	G	QP-255	Y_2018	161.783	PH
S3C1	C	C	QP-194	Y_2018	129.616	PH
S3C1	C	C	QP-194	Y_2019	160	PH
S3C10	G	G	QP-262	Y_2019	200.305	PH
S3C10	G	G	QP-262	Y_2018	213.759	PH
S3C2	G	G	QP-311	Y_2018	228.542	PH
S3C2	G	G	QP-311	Y_2019	261.095	PH
S3C3	G	G	QP-206	Y_2018	159.29	PH
S3C3	G	G	QP-206	Y_2019	163.82	PH
S3C4	G	G	QP-214	Y_2019	172.159	PH
S3C4	G	G	QP-214	Y_2018	172.838	PH
S3C5	G	G	QP-222	Y_2019	168.143	PH
S3C5	G	G	QP-222	Y_2018	191.779	PH
S3C6	G	G	QP-230	Y_2019	75.2349	PH
S3C6	G	G	QP-230	Y_2018	89.0887	PH
S3C7	G	G	QP-238	Y_2019	136.038	PH
S3C7	G	G	QP-238	Y_2018	167.278	PH
S3C8	G	G	QP-246	Y_2019	151.173	PH
S3C8	G	G	QP-246	Y_2018	162.857	PH
S3D1	G	G	QP-193	Y_2018	212.944	PH
S3D1	G	G	QP-193	Y_2019	217.222	PH
S3D10	G	G	QP-261	Y_2018	188.129	PH
S3D10	G	G	QP-261	Y_2019	203.619	PH
S3D11	G	G	QP-269	Y_2019	175.916	PH
S3D11	G	G	QP-269	Y_2018	199.39	PH
S3D3	G	G	QP-205	Y_2018	163.072	PH
S3D3	G	G	QP-205	Y_2019	174.386	PH
S3D4	G	G	QP-213	Y_2018	147.199	PH
S3D4	G	G	QP-213	Y_2019	166.098	PH
S3D5	G	G	QP-221	Y_2019	221.634	PH
S3D5	G	G	QP-221	Y_2018	242.056	PH
S3D6	G	G	QP-229	Y_2018	123.751	PH
S3D6	G	G	QP-229	Y_2019	148.095	PH
S3D7	G	G	QP-237	Y_2018	146.176	PH
S3D7	G	G	QP-237	Y_2019	152.031	PH
S3D8	G	G	QP-245	Y_2019	143.714	PH
S3D8	G	G	QP-245	Y_2018	160.93	PH
S3D9	G	G	QP-253	Y_2019	173.143	PH
S3D9	G	G	QP-253	Y_2018	199.641	PH
S3E1	G	G	QP-192	Y_2019	190.857	PH
S3E1	G	G	QP-192	Y_2018	216.69	PH
S3E10	G	G	QP-260	Y_2018	217.469	PH
S3E10	G	G	QP-260	Y_2019	229.459	PH
S3E11	G	G	QP-268	Y_2018	199.87	PH
S3E11	G	G	QP-268	Y_2019	209.761	PH
S3E3	G	G	QP-204	Y_2018	194.421	PH
S3E4	G	G	QP-212	Y_2018	235.073	PH
S3E4	G	G	QP-212	Y_2019	253.061	PH
S3E5	C	C	QP-220	Y_2018	92.6044	PH
S3E5	C	C	QP-220	Y_2019	102.01	PH
S3E6	G	G	QP-228	Y_2018	195.338	PH
S3E6	G	G	QP-228	Y_2019	201.006	PH
S3E7	G	G	QP-236	Y_2018	243.526	PH
S3E7	G	G	QP-236	Y_2019	244.312	PH
S3E8	G	G	QP-244	Y_2018	171.775	PH
S3E8	G	G	QP-244	Y_2019	177.416	PH
S3E9	G	G	QP-252	Y_2019	181.592	PH
S3E9	G	G	QP-252	Y_2018	210.656	PH
S3F1	C	C	QP-191	Y_2018	154.557	PH
S3F1	C	C	QP-191	Y_2019	162.813	PH
S3F10	G	G	QP-259	Y_2019	179.726	PH
S3F10	G	G	QP-259	Y_2018	201.139	PH
S3F2	G	G	QP-199	Y_2018	199.833	PH
S3F2	G	G	QP-199	Y_2019	202.772	PH
S3F3	G	G	QP-203	Y_2018	212.686	PH
S3F3	G	G	QP-203	Y_2019	237.667	PH
S3F4	G	G	QP-211	Y_2019	180.905	PH
S3F4	G	G	QP-211	Y_2018	184.25	PH
S3F5	G	G	QP-219	Y_2019	230.857	PH
S3F5	G	G	QP-219	Y_2018	235.189	PH
S3F6	G	G	QP-227	Y_2019	200	PH
S3F6	G	G	QP-227	Y_2018	232.602	PH
S3F7	G	G	QP-235	Y_2019	186.905	PH
S3F7	G	G	QP-235	Y_2018	212.241	PH
S3F8	G	G	QP-243	Y_2019	133.816	PH
S3F8	G	G	QP-243	Y_2018	143.911	PH
S3G1	G	G	QP-190	Y_2018	175.689	PH
S3G1	G	G	QP-190	Y_2019	177.333	PH
S3G3	G	G	QP-202	Y_2019	185.51	PH
S3G3	G	G	QP-202	Y_2018	207.126	PH
S3G5	G	G	QP-218	Y_2019	177.714	PH
S3G5	G	G	QP-218	Y_2018	181.001	PH
S3G6	C	C	QP-226	Y_2018	243.461	PH
S3G6	C	C	QP-226	Y_2019	246.762	PH
S3G8	G	G	QP-242	Y_2019	168.145	PH
S3G8	G	G	QP-242	Y_2018	180.266	PH
S3G9	G	G	QP-250	Y_2018	127.167	PH
S3H10	G	G	QP-257	Y_2019	216.619	PH
S3H10	G	G	QP-257	Y_2018	217.378	PH
S3H3	G	G	QP-201	Y_2018	174.764	PH
S3H3	G	G	QP-201	Y_2019	204.444	PH
S3H4	G	G	QP-209	Y_2019	187.101	PH
S3H4	G	G	QP-209	Y_2018	191.146	PH
S3H7	G	G	QP-233	Y_2018	139.599	PH
S3H7	G	G	QP-233	Y_2019	140.202	PH
S3H8	G	G	QP-241	Y_2019	148.209	PH
S3H8	G	G	QP-241	Y_2018	177.069	PH
S3H9	G	G	QP-249	Y_2019	120.237	PH
S3H9	G	G	QP-249	Y_2018	130.836	PH
S4A1	G	G	QP-288	Y_2018	177.222	PH
S4A1	G	G	QP-288	Y_2019	188.81	PH
S4A10	G	G	QP-280	Y_2019	234.655	PH
S4A10	G	G	QP-280	Y_2018	242.014	PH
S4A2	G	G	QP-296	Y_2019	235.273	PH
S4A2	G	G	QP-296	Y_2018	263.909	PH
S4A3	G	G	QP-304	Y_2018	200.875	PH
S4A3	G	G	QP-304	Y_2019	201.286	PH
S4A4	G	G	QP-317	Y_2019	184.003	PH
S4A4	G	G	QP-317	Y_2018	185.708	PH
S4A5	G	G	QP-325	Y_2019	159.11	PH
S4A5	G	G	QP-325	Y_2018	186.575	PH
S4A7	G	G	QP-084	Y_2018	85.9999	PH
S4A7	G	G	QP-084	Y_2019	109.701	PH
S4A8	G	G	QP-092	Y_2019	227.571	PH
S4A8	G	G	QP-092	Y_2018	237.102	PH
S4A9	G	G	QP-188	Y_2019	177.857	PH
S4A9	G	G	QP-188	Y_2018	199.57	PH
S4B1	G	G	QP-287	Y_2018	176.802	PH
S4B1	G	G	QP-287	Y_2019	190.012	PH
S4B10	G	G	QP-279	Y_2019	158.92	PH
S4B10	G	G	QP-279	Y_2018	178.073	PH
S4B2	G	G	QP-295	Y_2018	255.854	PH
S4B2	G	G	QP-295	Y_2019	263.286	PH
S4B4	G	G	QP-316	Y_2018	185.778	PH
S4B4	G	G	QP-316	Y_2019	217.095	PH
S4B5	G	G	QP-324	Y_2018	200.203	PH
S4B5	G	G	QP-324	Y_2019	220.948	PH
S4B6	C	C	QP-179	Y_2018	88.8045	PH
S4B6	C	C	QP-179	Y_2019	111.043	PH
S4B7	C	C	QP-083	Y_2018	130.722	PH
S4B7	C	C	QP-083	Y_2019	177.325	PH
S4B8	C	C	QP-091	Y_2018	138.563	PH
S4B8	C	C	QP-091	Y_2019	157.005	PH
S4B9	G	G	QP-187	Y_2018	197.647	PH
S4B9	G	G	QP-187	Y_2019	230.524	PH
S4C1	G	G	QP-286	Y_2018	201.163	PH
S4C1	G	G	QP-286	Y_2019	201.627	PH
S4C10	G	G	QP-278	Y_2019	133.857	PH
S4C10	G	G	QP-278	Y_2018	148.955	PH
S4C2	G	G	QP-294	Y_2018	199.714	PH
S4C2	G	G	QP-294	Y_2019	237.048	PH
S4C3	G	G	QP-302	Y_2019	158.143	PH
S4C3	G	G	QP-302	Y_2018	200.803	PH
S4C4	G	G	QP-315	Y_2018	168.851	PH
S4C4	G	G	QP-315	Y_2019	203.143	PH
S4C5	G	G	QP-323	Y_2019	158.233	PH
S4C5	G	G	QP-323	Y_2018	158.667	PH
S4C6	G	G	QP-334	Y_2018	139.752	PH
S4C6	G	G	QP-334	Y_2019	142.953	PH
S4C7	G	G	QP-082	Y_2019	238.326	PH
S4C7	G	G	QP-082	Y_2018	243.444	PH
S4C8	C	C	QP-090	Y_2018	142.677	PH
S4C8	C	C	QP-090	Y_2019	150.161	PH
S4C9	G	G	QP-186	Y_2019	163.192	PH
S4C9	G	G	QP-186	Y_2018	164.944	PH
S4D1	G	G	QP-285	Y_2019	191.221	PH
S4D1	G	G	QP-285	Y_2018	204.487	PH
S4D10	G	G	QP-277	Y_2019	152.493	PH
S4D10	G	G	QP-277	Y_2018	174.572	PH
S4D11	G	G	QP-271	Y_2019	171.286	PH
S4D11	G	G	QP-271	Y_2018	182.842	PH
S4D2	G	G	QP-293	Y_2018	213.233	PH
S4D2	G	G	QP-293	Y_2019	255.827	PH
S4D3	G	G	QP-301	Y_2019	219.333	PH
S4D3	G	G	QP-301	Y_2018	253.076	PH
S4D5	G	G	QP-322	Y_2019	136.722	PH
S4D5	G	G	QP-322	Y_2018	139.213	PH
S4D6	G	G	QP-333	Y_2018	161.041	PH
S4D6	G	G	QP-333	Y_2019	177.278	PH
S4D7	G	G	QP-328	Y_2019	175.619	PH
S4D7	G	G	QP-328	Y_2018	200.834	PH
S4D8	C	C	QP-089	Y_2018	84.4021	PH
S4D8	C	C	QP-089	Y_2019	104.524	PH
S4D9	C	C	QP-185	Y_2018	174.595	PH
S4D9	C	C	QP-185	Y_2019	203.219	PH
S4E1	G	G	QP-284	Y_2019	171.373	PH
S4E1	G	G	QP-284	Y_2018	182.111	PH
S4E11	G	G	QP-270	Y_2019	147.853	PH
S4E11	G	G	QP-270	Y_2018	195.689	PH
S4E2	G	G	QP-292	Y_2018	220.944	PH
S4E2	G	G	QP-292	Y_2019	241.667	PH
S4E3	G	G	QP-300	Y_2019	239.079	PH
S4E3	G	G	QP-300	Y_2018	245.585	PH
S4E4	G	G	QP-308	Y_2018	225.402	PH
S4E4	G	G	QP-308	Y_2019	254.333	PH
S4E5	G	G	QP-321	Y_2019	157.421	PH
S4E5	G	G	QP-321	Y_2018	178.444	PH
S4E6	G	G	QP-332	Y_2018	184.667	PH
S4E6	G	G	QP-332	Y_2019	211.297	PH
S4E7	G	G	QP-327	Y_2019	176.309	PH
S4E7	G	G	QP-327	Y_2018	192.843	PH
S4E8	G	G	QP-088	Y_2018	196.465	PH
S4E8	G	G	QP-088	Y_2019	209.81	PH
S4E9	G	G	QP-184	Y_2018	168.145	PH
S4E9	G	G	QP-184	Y_2019	168.619	PH
S4F1	G	G	QP-283	Y_2019	122.852	PH
S4F1	G	G	QP-283	Y_2018	129.29	PH
S4F10	G	G	QP-275	Y_2018	212.156	PH
S4F10	G	G	QP-275	Y_2019	259.19	PH
S4F11	C	C	QP-180	Y_2018	120.775	PH
S4F11	C	C	QP-180	Y_2019	187.277	PH
S4F2	G	G	QP-291	Y_2019	182.667	PH
S4F2	G	G	QP-291	Y_2018	194.722	PH
S4F3	G	G	QP-299	Y_2019	168.297	PH
S4F3	G	G	QP-299	Y_2018	209.389	PH
S4F4	G	G	QP-307	Y_2019	172.298	PH
S4F4	G	G	QP-307	Y_2018	190.012	PH
S4F5	G	G	QP-320	Y_2018	224.412	PH
S4F5	G	G	QP-320	Y_2019	246.905	PH
S4F6	G	G	QP-331	Y_2018	213.355	PH
S4F6	G	G	QP-331	Y_2019	250.27	PH
S4F7	G	G	QP-326	Y_2019	149.635	PH
S4F7	G	G	QP-326	Y_2018	163.002	PH
S4F8	G	G	QP-087	Y_2018	138.72	PH
S4F8	G	G	QP-087	Y_2019	151.352	PH
S4F9	G	G	QP-183	Y_2018	157.938	PH
S4F9	G	G	QP-183	Y_2019	159.261	PH
S4G1	G	G	QP-282	Y_2018	206.536	PH
S4G1	G	G	QP-282	Y_2019	211.845	PH
S4G10	G	G	QP-274	Y_2018	203.795	PH
S4G10	G	G	QP-274	Y_2019	211.854	PH
S4G2	G	G	QP-290	Y_2019	197.733	PH
S4G2	G	G	QP-290	Y_2018	218.925	PH
S4G3	G	G	QP-298	Y_2019	255.142	PH
S4G3	G	G	QP-298	Y_2018	292.293	PH
S4G4	G	G	QP-306	Y_2019	156.762	PH
S4G4	G	G	QP-306	Y_2018	161.786	PH
S4G5	G	G	QP-319	Y_2019	130.779	PH
S4G5	G	G	QP-319	Y_2018	165.34	PH
S4G6	G	G	QP-330	Y_2018	222.798	PH
S4G6	G	G	QP-330	Y_2019	241.327	PH
S4G7	G	G	QP-309	Y_2018	184.789	PH
S4G7	G	G	QP-309	Y_2019	234.381	PH
S4G8	C	C	QP-086	Y_2018	112.693	PH
S4G8	C	C	QP-086	Y_2019	127.556	PH
S4G9	G	G	QP-182	Y_2019	162.416	PH
S4G9	G	G	QP-182	Y_2018	175.648	PH
S4H1	G	G	QP-281	Y_2019	260.229	PH
S4H1	G	G	QP-281	Y_2018	270.845	PH
S4H10	G	G	QP-273	Y_2019	190.714	PH
S4H10	G	G	QP-273	Y_2018	211.417	PH
S4H11	G	G	QP-178	Y_2018	220.07	PH
S4H11	G	G	QP-178	Y_2019	227.095	PH
S4H2	G	G	QP-289	Y_2019	240.562	PH
S4H2	G	G	QP-289	Y_2018	251.445	PH
S4H3	G	G	QP-297	Y_2018	217.652	PH
S4H3	G	G	QP-297	Y_2019	233.238	PH
S4H4	G	G	QP-305	Y_2019	195.968	PH
S4H4	G	G	QP-305	Y_2018	199.031	PH
S4H5	G	G	QP-318	Y_2018	221.881	PH
S4H5	G	G	QP-318	Y_2019	226.275	PH
S4H6	G	G	QP-329	Y_2019	158.857	PH
S4H6	G	G	QP-329	Y_2018	195.894	PH
S4H8	G	G	QP-085	Y_2019	143.286	PH
S4H8	G	G	QP-085	Y_2018	174.114	PH
S4H9	C	C	QP-181	Y_2019	123.136	PH
S4H9	C	C	QP-181	Y_2018	137.488	PH
10176	G	G	QP-276	Y_2018	61.3133	PL
10176	G	G	QP-276	Y_2019	85.384	PL
10178	G	G	QP-164	Y_2019	80.5533	PL
10178	G	G	QP-164	Y_2018	82.6724	PL
S1A10	G	G	QP-076	Y_2018	77.0678	PL
S1A10	G	G	QP-076	Y_2019	89.6757	PL
S1A2	G	G	QP-014	Y_2018	68.4133	PL
S1A2	G	G	QP-014	Y_2019	92.8571	PL
S1A3	G	G	QP-022	Y_2019	49.4453	PL
S1A3	G	G	QP-022	Y_2018	76.7386	PL
S1A5	C	C	QP-038	Y_2019	36.619	PL
S1A5	C	C	QP-038	Y_2018	40.7778	PL
S1A6	C	C	QP-046	Y_2019	34.1029	PL
S1A6	C	C	QP-046	Y_2018	45.0911	PL
S1A8	C	C	QP-061	Y_2018	40.6057	PL
S1A8	C	C	QP-061	Y_2019	44.9048	PL
S1A9	G	G	QP-068	Y_2018	37.0246	PL
S1A9	G	G	QP-068	Y_2019	48.3077	PL
S1B1	C	C	QP-006	Y_2018	41.2142	PL
S1B1	C	C	QP-006	Y_2019	47.7818	PL
S1B3	C	C	QP-021	Y_2018	44.469	PL
S1B3	C	C	QP-021	Y_2019	52	PL
S1B4	G	G	QP-029	Y_2018	52.2222	PL
S1B4	G	G	QP-029	Y_2019	63.4321	PL
S1B5	G	G	QP-037	Y_2018	56.323	PL
S1B5	G	G	QP-037	Y_2019	70.4762	PL
S1B6	C	C	QP-045	Y_2019	34.0476	PL
S1B6	C	C	QP-045	Y_2018	35.2778	PL
S1B8	C	C	QP-060	Y_2019	28.381	PL
S1B8	C	C	QP-060	Y_2018	32.7336	PL
S1C1	C	C	QP-005	Y_2018	40.0327	PL
S1C1	C	C	QP-005	Y_2019	43.9936	PL
S1C10	G	G	QP-074	Y_2019	71.1196	PL
S1C10	G	G	QP-074	Y_2018	76.3526	PL
S1C2	G	G	QP-013	Y_2018	64.8431	PL
S1C2	G	G	QP-013	Y_2019	75.0655	PL
S1C3	G	G	QP-020	Y_2018	55.5908	PL
S1C3	G	G	QP-020	Y_2019	61.0708	PL
S1C4	G	G	QP-028	Y_2018	63.5205	PL
S1C4	G	G	QP-028	Y_2019	84.2857	PL
S1C6	C	C	QP-044	Y_2018	32.1155	PL
S1C6	C	C	QP-044	Y_2019	33.4762	PL
S1C7	G	G	QP-052	Y_2018	68.414	PL
S1C7	G	G	QP-052	Y_2019	75.3333	PL
S1C9	C	C	QP-066	Y_2018	36.1362	PL
S1C9	C	C	QP-066	Y_2019	46.4274	PL
S1D1	C	C	QP-004	Y_2018	32.0011	PL
S1D1	C	C	QP-004	Y_2019	36.0784	PL
S1D10	C	C	QP-073	Y_2019	36.5238	PL
S1D10	C	C	QP-073	Y_2018	39.0391	PL
S1D11	G	G	QP-081	Y_2018	52.6108	PL
S1D11	G	G	QP-081	Y_2019	66.0382	PL
S1D2	G	G	QP-012	Y_2019	68.4762	PL
S1D2	G	G	QP-012	Y_2018	76.5831	PL
S1D3	C	C	QP-019	Y_2018	41.5867	PL
S1D3	C	C	QP-019	Y_2019	45.5196	PL
S1D4	G	G	QP-027	Y_2019	36.6667	PL
S1D4	G	G	QP-027	Y_2018	36.6667	PL
S1D5	C	C	QP-035	Y_2018	36.9807	PL
S1D5	C	C	QP-035	Y_2019	40.4392	PL
S1D6	C	C	QP-043	Y_2019	48.0952	PL
S1D6	C	C	QP-043	Y_2018	49.2628	PL
S1D8	G	G	QP-058	Y_2018	64.1113	PL
S1D8	G	G	QP-058	Y_2019	66.4894	PL
S1E1	C	C	QP-003	Y_2018	31.0293	PL
S1E1	C	C	QP-003	Y_2019	38.3237	PL
S1E11	G	G	QP-080	Y_2019	75.9645	PL
S1E11	G	G	QP-080	Y_2018	76.9876	PL
S1E2	G	G	QP-011	Y_2019	68.4762	PL
S1E2	G	G	QP-011	Y_2018	81.7421	PL
S1E3	C	C	QP-018	Y_2018	42.9458	PL
S1E3	C	C	QP-018	Y_2019	53.2524	PL
S1E4	C	C	QP-026	Y_2019	37.5714	PL
S1E4	C	C	QP-026	Y_2018	39.1484	PL
S1E5	G	G	QP-034	Y_2018	52.9556	PL
S1E5	G	G	QP-034	Y_2019	58.4762	PL
S1E6	C	C	QP-042	Y_2019	44.3793	PL
S1E6	C	C	QP-042	Y_2018	47.0155	PL
S1E8	G	G	QP-057	Y_2019	69.9048	PL
S1E8	G	G	QP-057	Y_2018	81.7419	PL
S1E9	C	C	QP-065	Y_2018	24.9592	PL
S1E9	C	C	QP-065	Y_2019	29.2813	PL
S1F1	C	C	QP-002	Y_2018	29.3499	PL
S1F1	C	C	QP-002	Y_2019	31.0783	PL
S1F10	G	G	QP-071	Y_2018	62.844	PL
S1F10	G	G	QP-071	Y_2019	68	PL
S1F11	G	G	QP-079	Y_2018	77.6331	PL
S1F11	G	G	QP-079	Y_2019	81.6667	PL
S1F2	G	G	QP-010	Y_2019	61.221	PL
S1F2	G	G	QP-010	Y_2018	74.971	PL
S1F3	G	G	QP-017	Y_2019	68.5714	PL
S1F3	G	G	QP-017	Y_2018	75.6404	PL
S1F4	G	G	QP-025	Y_2018	61.6082	PL
S1F4	G	G	QP-025	Y_2019	73.5238	PL
S1F5	G	G	QP-033	Y_2018	61.9161	PL
S1F5	G	G	QP-033	Y_2019	84.2857	PL
S1F6	C	C	QP-041	Y_2019	29.5038	PL
S1F6	C	C	QP-041	Y_2018	32.5934	PL
S1F7	C	C	QP-049	Y_2018	59.2408	PL
S1F7	C	C	QP-049	Y_2019	67.1386	PL
S1F8	G	G	QP-056	Y_2018	53.8474	PL
S1F8	G	G	QP-056	Y_2019	69.968	PL
S1F9	G	G	QP-064	Y_2018	33.0538	PL
S1F9	G	G	QP-064	Y_2019	44.6079	PL
S1G1	C	C	QP-001	Y_2018	44.2045	PL
S1G1	C	C	QP-001	Y_2019	58.4445	PL
S1G10	G	G	QP-070	Y_2018	56.8004	PL
S1G10	G	G	QP-070	Y_2019	68.7555	PL
S1G11	G	G	QP-078	Y_2019	80.9307	PL
S1G11	G	G	QP-078	Y_2018	88.3333	PL
S1G3	G	G	QP-016	Y_2018	51.8654	PL
S1G3	G	G	QP-016	Y_2019	52.7212	PL
S1G4	G	G	QP-024	Y_2019	67.3333	PL
S1G4	G	G	QP-024	Y_2018	73.8423	PL
S1G5	C	C	QP-032	Y_2019	38.8975	PL
S1G5	C	C	QP-032	Y_2018	50.4287	PL
S1G6	G	G	QP-040	Y_2019	24.1612	PL
S1G6	G	G	QP-040	Y_2018	37.1895	PL
S1G7	C	C	QP-048	Y_2018	49.1107	PL
S1G7	C	C	QP-048	Y_2019	50.2381	PL
S1G8	C	C	QP-055	Y_2018	34.8762	PL
S1G8	C	C	QP-055	Y_2019	53.2257	PL
S1G9	C	C	QP-063	Y_2019	46.4286	PL
S1G9	C	C	QP-063	Y_2018	53.174	PL
S1H11	G	G	QP-077	Y_2018	62.4921	PL
S1H11	G	G	QP-077	Y_2019	80.8734	PL
S1H2	G	G	QP-008	Y_2018	62.9353	PL
S1H2	G	G	QP-008	Y_2019	64.5084	PL
S1H3	G	G	QP-015	Y_2018	67.7381	PL
S1H3	G	G	QP-015	Y_2019	82.4787	PL
S1H4	G	G	QP-023	Y_2019	63.9048	PL
S1H4	G	G	QP-023	Y_2018	79.6165	PL
S1H6	C	C	QP-039	Y_2018	38.6485	PL
S1H6	C	C	QP-039	Y_2019	54.5535	PL
S1H7	C	C	QP-047	Y_2018	52.7719	PL
S1H8	G	G	QP-054	Y_2019	65.0476	PL
S1H8	G	G	QP-054	Y_2018	82.0072	PL
S1H9	C	C	QP-062	Y_2018	41.4984	PL
S1H9	C	C	QP-062	Y_2019	48.691	PL
S2A1	G	G	QP-101	Y_2018	72.0228	PL
S2A1	G	G	QP-101	Y_2019	78.4762	PL
S2A4	C	C	QP-123	Y_2018	43.0791	PL
S2A4	C	C	QP-123	Y_2019	43.364	PL
S2A5	G	G	QP-131	Y_2018	70.2932	PL
S2A5	G	G	QP-131	Y_2019	78.8312	PL
S2A6	C	C	QP-139	Y_2019	27.1077	PL
S2A6	C	C	QP-139	Y_2018	35.659	PL
S2A7	G	G	QP-147	Y_2018	52.0556	PL
S2A7	G	G	QP-147	Y_2019	68.381	PL
S2A8	G	G	QP-155	Y_2019	86.5714	PL
S2A8	G	G	QP-155	Y_2018	105.057	PL
S2A9	G	G	QP-163	Y_2018	63.6511	PL
S2A9	G	G	QP-163	Y_2019	68.8919	PL
S2B1	G	G	QP-100	Y_2019	54.4354	PL
S2B1	G	G	QP-100	Y_2018	55.6902	PL
S2B10	G	G	QP-170	Y_2019	61.787	PL
S2B10	G	G	QP-170	Y_2018	65.4168	PL
S2B2	C	C	QP-107	Y_2019	28.2035	PL
S2B2	C	C	QP-107	Y_2018	33.0641	PL
S2B3	G	G	QP-115	Y_2018	56.3333	PL
S2B3	G	G	QP-115	Y_2019	81.0476	PL
S2B4	G	G	QP-122	Y_2018	62.9086	PL
S2B4	G	G	QP-122	Y_2019	80.8277	PL
S2B5	G	G	QP-130	Y_2019	72.6653	PL
S2B5	G	G	QP-130	Y_2018	74.1719	PL
S2B6	G	G	QP-138	Y_2019	56.8127	PL
S2B6	G	G	QP-138	Y_2018	90.1812	PL
S2B7	G	G	QP-146	Y_2018	61.4379	PL
S2B7	G	G	QP-146	Y_2019	66.0952	PL
S2B8	G	G	QP-154	Y_2018	64.2967	PL
S2B8	G	G	QP-154	Y_2019	75.1429	PL
S2B9	G	G	QP-162	Y_2018	68.9533	PL
S2B9	G	G	QP-162	Y_2019	81.7645	PL
S2C10	C	C	QP-169	Y_2018	43.2778	PL
S2C10	C	C	QP-169	Y_2019	47.5806	PL
S2C2	G	G	QP-106	Y_2018	47.373	PL
S2C2	G	G	QP-106	Y_2019	67.9602	PL
S2C4	G	G	QP-121	Y_2019	70.7947	PL
S2C4	G	G	QP-121	Y_2018	79.0089	PL
S2C5	G	G	QP-129	Y_2019	63.1292	PL
S2C5	G	G	QP-129	Y_2018	74.5419	PL
S2C6	G	G	QP-137	Y_2018	48.6523	PL
S2C6	G	G	QP-137	Y_2019	67.5467	PL
S2C7	G	G	QP-145	Y_2019	64.1637	PL
S2C7	G	G	QP-145	Y_2018	73.3461	PL
S2C9	G	G	QP-161	Y_2019	61.9758	PL
S2C9	G	G	QP-161	Y_2018	82.8889	PL
S2D1	C	C	QP-098	Y_2018	46.278	PL
S2D1	C	C	QP-098	Y_2019	56.7154	PL
S2D10	G	G	QP-168	Y_2019	58.2381	PL
S2D10	G	G	QP-168	Y_2018	67	PL
S2D11	G	G	QP-177	Y_2019	93.5714	PL
S2D11	G	G	QP-177	Y_2018	94.4036	PL
S2D3	C	C	QP-113	Y_2018	42.2209	PL
S2D3	C	C	QP-113	Y_2019	50.7212	PL
S2D5	G	G	QP-128	Y_2019	32.7143	PL
S2D5	G	G	QP-128	Y_2018	35.5535	PL
S2D7	G	G	QP-144	Y_2018	45.5928	PL
S2D7	G	G	QP-144	Y_2019	70.4007	PL
S2D8	G	G	QP-152	Y_2019	69.8219	PL
S2D8	G	G	QP-152	Y_2018	69.9655	PL
S2D9	G	G	QP-160	Y_2018	57.6939	PL
S2D9	G	G	QP-160	Y_2019	67.3103	PL
S2E1	G	G	QP-097	Y_2019	36.6137	PL
S2E1	G	G	QP-097	Y_2018	37.7538	PL
S2E10	G	G	QP-167	Y_2018	70.734	PL
S2E10	G	G	QP-167	Y_2019	103.165	PL
S2E11	C	C	QP-176	Y_2019	45.1373	PL
S2E11	C	C	QP-176	Y_2018	47.7778	PL
S2E3	G	G	QP-112	Y_2019	22.3383	PL
S2E3	G	G	QP-112	Y_2018	55.1901	PL
S2E5	C	C	QP-127	Y_2018	27.0076	PL
S2E5	C	C	QP-127	Y_2019	28.9048	PL
S2E6	C	C	QP-135	Y_2018	53.3965	PL
S2E6	C	C	QP-135	Y_2019	61.346	PL
S2E7	G	G	QP-143	Y_2018	74.1362	PL
S2E7	G	G	QP-143	Y_2019	75.9524	PL
S2E9	G	G	QP-159	Y_2018	79.3145	PL
S2E9	G	G	QP-159	Y_2019	83.619	PL
S2F1	C	C	QP-096	Y_2018	33.0372	PL
S2F1	C	C	QP-096	Y_2019	55.2172	PL
S2F10	G	G	QP-166	Y_2018	82.9584	PL
S2F10	G	G	QP-166	Y_2019	89.1905	PL
S2F11	C	C	QP-175	Y_2018	37.258	PL
S2F11	C	C	QP-175	Y_2019	44.8095	PL
S2F2	G	G	QP-104	Y_2018	60.6449	PL
S2F2	G	G	QP-104	Y_2019	74.9088	PL
S2F3	G	G	QP-111	Y_2018	38.9849	PL
S2F3	G	G	QP-111	Y_2019	46.381	PL
S2F4	C	C	QP-067	Y_2018	44.9789	PL
S2F4	C	C	QP-067	Y_2019	52.1362	PL
S2F5	C	C	QP-126	Y_2018	37.3945	PL
S2F5	C	C	QP-126	Y_2019	53.619	PL
S2F7	G	G	QP-142	Y_2018	80.8824	PL
S2F7	G	G	QP-142	Y_2019	89.5714	PL
S2F8	G	G	QP-150	Y_2018	86.1626	PL
S2F8	G	G	QP-150	Y_2019	88.7111	PL
S2G1	G	G	QP-095	Y_2018	50.9738	PL
S2G1	G	G	QP-095	Y_2019	61.7619	PL
S2G10	C	C	QP-165	Y_2018	35.8331	PL
S2G10	C	C	QP-165	Y_2019	39.991	PL
S2G11	G	G	QP-174	Y_2018	64.1667	PL
S2G11	G	G	QP-174	Y_2019	96.7143	PL
S2G2	C	C	QP-103	Y_2018	24.6671	PL
S2G2	C	C	QP-103	Y_2019	26.7545	PL
S2G3	G	G	QP-110	Y_2019	82.2572	PL
S2G3	G	G	QP-110	Y_2018	84.1144	PL
S2G4	G	G	QP-118	Y_2018	44.4907	PL
S2G4	G	G	QP-118	Y_2019	81.2778	PL
S2G5	G	G	QP-125	Y_2019	76.3247	PL
S2G5	G	G	QP-125	Y_2018	83.9043	PL
S2G6	G	G	QP-133	Y_2018	56.7222	PL
S2G6	G	G	QP-133	Y_2019	66.9354	PL
S2G8	G	G	QP-149	Y_2019	49.4366	PL
S2G8	G	G	QP-149	Y_2018	60.9296	PL
S2G9	G	G	QP-157	Y_2019	66.7222	PL
S2G9	G	G	QP-157	Y_2018	84.3676	PL
S2H11	C	C	QP-172	Y_2018	40.4118	PL
S2H11	C	C	QP-172	Y_2019	43.1429	PL
S2H2	G	G	QP-102	Y_2018	73.5183	PL
S2H2	G	G	QP-102	Y_2019	88.0476	PL
S2H3	C	C	QP-109	Y_2019	40.6111	PL
S2H3	C	C	QP-109	Y_2018	46.5649	PL
S2H4	G	G	QP-117	Y_2018	48.5559	PL
S2H4	G	G	QP-117	Y_2019	80.5238	PL
S2H5	G	G	QP-124	Y_2018	62.0961	PL
S2H5	G	G	QP-124	Y_2019	70.0622	PL
S2H6	G	G	QP-132	Y_2018	63.6339	PL
S2H6	G	G	QP-132	Y_2019	68.6667	PL
S2H7	G	G	QP-140	Y_2019	50.3411	PL
S2H7	G	G	QP-140	Y_2018	53.2746	PL
S2H8	G	G	QP-148	Y_2018	85.0506	PL
S2H8	G	G	QP-148	Y_2019	98.6779	PL
S2H9	G	G	QP-156	Y_2019	89.9524	PL
S2H9	G	G	QP-156	Y_2018	96.2077	PL
S3A10	G	G	QP-264	Y_2018	57.1944	PL
S3A10	G	G	QP-264	Y_2019	89.381	PL
S3A3	G	G	QP-208	Y_2018	58.9726	PL
S3A3	G	G	QP-208	Y_2019	81.3768	PL
S3A4	G	G	QP-216	Y_2018	59.6783	PL
S3A4	G	G	QP-216	Y_2019	60.2381	PL
S3A5	G	G	QP-224	Y_2018	43.5286	PL
S3A5	G	G	QP-224	Y_2019	63.0069	PL
S3A6	C	C	QP-232	Y_2019	36.0841	PL
S3A6	C	C	QP-232	Y_2018	37.5053	PL
S3A7	C	C	QP-240	Y_2018	59.9432	PL
S3A7	C	C	QP-240	Y_2019	72.6908	PL
S3A8	G	G	QP-248	Y_2018	49.6434	PL
S3A8	G	G	QP-248	Y_2019	60.7078	PL
S3A9	G	G	QP-256	Y_2018	78.676	PL
S3A9	G	G	QP-256	Y_2019	82	PL
S3B1	G	G	QP-195	Y_2018	71.5332	PL
S3B1	G	G	QP-195	Y_2019	83.1452	PL
S3B3	G	G	QP-207	Y_2018	62.0175	PL
S3B3	G	G	QP-207	Y_2019	90.8095	PL
S3B4	G	G	QP-215	Y_2018	32.7238	PL
S3B4	G	G	QP-215	Y_2019	46.2857	PL
S3B5	G	G	QP-223	Y_2018	77	PL
S3B5	G	G	QP-223	Y_2019	88.8312	PL
S3B6	G	G	QP-231	Y_2018	21.5837	PL
S3B6	G	G	QP-231	Y_2019	26.9529	PL
S3B8	G	G	QP-247	Y_2018	51.5859	PL
S3B8	G	G	QP-247	Y_2019	74.0177	PL
S3B9	G	G	QP-255	Y_2019	75.8095	PL
S3B9	G	G	QP-255	Y_2018	81.0933	PL
S3C1	C	C	QP-194	Y_2018	36.6702	PL
S3C1	C	C	QP-194	Y_2019	43.0476	PL
S3C10	G	G	QP-262	Y_2019	86.0255	PL
[truncated: 253 more rows]
