# Supplementary material for: Genome-wide association study in quinoa reveals selection pattern typical for crops with a short breeding history
Source: eLife. 2022 Jul 8;11:e66873. doi: 10.7554/eLife.66873 (PMC9388097; doi:10.7554/eLife.66873)
Supplement: Figure 3—source data 3. [file elife-66873-fig3-data3.xlsx]

## Sheet: Sheet1
Fig. 3c-Source data 3c
Fig.3c: Local Manhattan plot from region 8.04 - 8.14 Mb on chromosome Cq2A associated with PC1 of the days to flowering, days to maturity, plant height, and panicle length
Marker	Pos	p	REF	ALT
2_8093547	8093547	5.86e-13	C	G
2_8080505	8080505	6.2e-12	G	C
2_8080510	8080510	7.54e-12	C	A
2_8101350	8101350	1e-11	C	T
2_8116642	8116642	1.09e-11	T	C
2_8101405	8101405	9.47e-11	G	A
2_8091446	8091446	1.04e-10	A	C
2_8095642	8095642	1.41e-10	C	T
2_8102563	8102563	1.66e-10	C	T
2_8101359	8101359	1.74e-10	A	G
2_8090474	8090474	2.72e-10	T	C
2_8115444	8115444	3.31e-10	G	A
2_8090512	8090512	3.58e-10	C	A
2_8092767	8092767	4.55e-10	G	A
2_8093529	8093529	5.24e-10	T	C
2_8098058	8098058	6.28e-10	A	C
2_8092111	8092111	7.6e-10	T	A
2_8105846	8105846	7.73e-10	G	A
2_8110071	8110071	9.03e-10	C	T
2_8080707	8080707	9.32e-10	A	C
2_8080517	8080517	9.37e-10	G	A
2_8102530	8102530	1.02e-09	A	G
2_8092770	8092770	1.16e-09	A	T
2_8080706	8080706	1.22e-09	A	G
2_8103985	8103985	1.29e-09	G	A
2_8104433	8104433	1.93e-09	G	A
2_8088548	8088548	1.94e-09	C	A
2_8093485	8093485	1.99e-09	C	T
2_8093443	8093443	2.19e-09	T	A
2_8091617	8091617	2.46e-09	T	G
2_8095656	8095656	2.51e-09	A	C
2_8095650	8095650	2.7e-09	T	C
2_8102372	8102372	2.89e-09	C	T
2_8091745	8091745	2.92e-09	G	A
2_8133976	8133976	2.95e-09	G	A
2_8101129	8101129	3.49e-09	G	C
2_8115470	8115470	3.79e-09	A	C
2_8115471	8115471	3.79e-09	T	C
2_8090684	8090684	3.9e-09	T	G
2_8090614	8090614	4.03e-09	A	C
2_8100362	8100362	4.25e-09	C	G
2_8100740	8100740	4.42e-09	A	G
2_8105539	8105539	4.95e-09	C	T
2_8086774	8086774	5.11e-09	G	A
2_8116733	8116733	5.18e-09	A	G
2_8101949	8101949	5.21e-09	G	A
2_8103082	8103082	5.77e-09	A	C
2_8080697	8080697	6.8e-09	T	C
2_8080689	8080689	7.39e-09	A	G
2_8080691	8080691	7.39e-09	T	G
2_8092739	8092739	7.59e-09	G	A
2_8101414	8101414	7.6e-09	A	G
2_8137455	8137455	7.76e-09	C	T
2_8100769	8100769	8.03e-09	G	A
2_8088438	8088438	8.27e-09	T	G
2_8092545	8092545	8.98e-09	C	T
2_8093181	8093181	9.71e-09	C	A
2_8103514	8103514	9.77e-09	C	A
2_8090430	8090430	1.22e-08	G	T
2_8092442	8092442	1.26e-08	T	C
2_8092470	8092470	1.3e-08	T	C
2_8105045	8105045	1.3e-08	A	C
2_8100824	8100824	1.77e-08	G	A
2_8102695	8102695	2.12e-08	G	A
2_8092791	8092791	2.2e-08	A	T
2_8098368	8098368	2.48e-08	G	A
2_8088607	8088607	2.54e-08	G	A
2_8101026	8101026	2.55e-08	A	G
2_8104427	8104427	2.56e-08	C	T
2_8101001	8101001	2.62e-08	A	G
2_8116664	8116664	2.62e-08	C	T
2_8112121	8112121	2.65e-08	T	A
2_8112137	8112137	2.81e-08	A	G
2_8137928	8137928	2.99e-08	G	A
2_8113265	8113265	3.26e-08	T	G
2_8104773	8104773	3.36e-08	A	T
2_8088428	8088428	3.43e-08	A	G
2_8092408	8092408	3.67e-08	A	T
2_8103734	8103734	3.8e-08	T	C
2_8103741	8103741	3.86e-08	C	T
2_8090049	8090049	3.93e-08	G	T
2_8105521	8105521	4.01e-08	A	G
2_8104537	8104537	4.03e-08	C	T
2_8088627	8088627	4.62e-08	C	T
2_8101912	8101912	4.69e-08	G	A
2_8114820	8114820	4.81e-08	C	T
2_8092835	8092835	5.14e-08	T	C
2_8105140	8105140	5.16e-08	G	A
2_8116626	8116626	6.81e-08	G	C
2_8090653	8090653	6.85e-08	T	C
2_8100988	8100988	6.88e-08	G	A
2_8115621	8115621	7.89e-08	C	T
2_8115362	8115362	8.14e-08	G	T
2_8096902	8096902	8.67e-08	C	T
2_8112095	8112095	9.14e-08	A	G
2_8092409	8092409	9.32e-08	A	G
2_8116510	8116510	9.56e-08	C	G
2_8097511	8097511	9.9e-08	T	C
2_8111657	8111657	1.09e-07	T	C
2_8112202	8112202	1.11e-07	T	C
2_8139292	8139292	1.25e-07	G	A
2_8114856	8114856	1.31e-07	A	G
2_8080536	8080536	1.36e-07	G	A
2_8104079	8104079	1.53e-07	T	G
2_8090579	8090579	1.61e-07	A	G
2_8140192	8140192	1.77e-07	C	T
2_8092678	8092678	1.83e-07	T	A
2_8089503	8089503	1.92e-07	G	T
2_8120797	8120797	2.11e-07	A	C
2_8143502	8143502	2.38e-07	T	C
2_8088946	8088946	2.56e-07	A	G
2_8083242	8083242	2.6e-07	C	T
2_8113712	8113712	2.61e-07	A	G
2_8118388	8118388	2.78e-07	T	C
2_8103150	8103150	3.03e-07	C	A
2_8103153	8103153	3.03e-07	C	T
2_8092231	8092231	3.12e-07	G	T
2_8102628	8102628	3.31e-07	C	T
2_8100517	8100517	3.33e-07	C	T
2_8087067	8087067	3.42e-07	T	A
2_8112232	8112232	3.43e-07	T	C
2_8112234	8112234	3.43e-07	G	A
2_8102644	8102644	3.83e-07	T	G
2_8092198	8092198	3.93e-07	A	G
2_8086999	8086999	4.39e-07	T	A
2_8112240	8112240	4.44e-07	C	T
2_8100801	8100801	4.5e-07	G	A
2_8111634	8111634	4.85e-07	C	T
2_8139322	8139322	5.14e-07	T	C
2_8080642	8080642	5.24e-07	C	T
2_8104612	8104612	5.25e-07	A	G
2_8112167	8112167	5.26e-07	A	C
2_8081365	8081365	5.61e-07	G	A
2_8105579	8105579	5.64e-07	T	C
2_8052334	8052334	5.71e-07	T	C
2_8089602	8089602	5.88e-07	T	C
2_8111611	8111611	6.19e-07	T	G
2_8105049	8105049	6.65e-07	C	T
2_8112737	8112737	6.87e-07	T	C
2_8099002	8099002	7.19e-07	T	C
2_8142666	8142666	7.36e-07	G	T
2_8114984	8114984	7.94e-07	T	C
2_8093035	8093035	8.42e-07	A	G
2_8120066	8120066	8.57e-07	T	C
2_8096468	8096468	8.81e-07	C	A
2_8080661	8080661	8.96e-07	A	G
2_8091344	8091344	8.97e-07	G	A
2_8103050	8103050	9.52e-07	C	T
2_8113766	8113766	9.63e-07	A	G
2_8081438	8081438	1e-06	A	T
2_8077013	8077013	1.02e-06	T	C
2_8092915	8092915	1.05e-06	C	T
2_8100705	8100705	1.06e-06	G	A
2_8096793	8096793	1.08e-06	T	C
2_8100532	8100532	1.08e-06	G	A
2_8111963	8111963	1.08e-06	C	T
2_8089893	8089893	1.09e-06	G	A
2_8105025	8105025	1.15e-06	C	G
2_8138397	8138397	1.2e-06	C	T
2_8081418	8081418	1.24e-06	A	G
2_8080667	8080667	1.26e-06	C	T
2_8080666	8080666	1.27e-06	A	C
2_8112022	8112022	1.29e-06	C	G
2_8142809	8142809	1.31e-06	T	G
2_8080659	8080659	1.41e-06	A	G
2_8111563	8111563	1.41e-06	T	C
2_8088003	8088003	1.64e-06	T	A
2_8100528	8100528	1.66e-06	C	A
2_8111972	8111972	1.67e-06	C	T
2_8090227	8090227	1.68e-06	G	A
2_8089238	8089238	1.78e-06	T	C
2_8119968	8119968	1.8e-06	C	T
2_8090354	8090354	1.84e-06	G	A
2_8099059	8099059	1.9e-06	A	T
2_8100429	8100429	1.91e-06	T	G
2_8081432	8081432	1.97e-06	G	A
2_8084325	8084325	2.01e-06	A	G
2_8104360	8104360	2.05e-06	G	A
2_8100858	8100858	2.06e-06	A	G
2_8081452	8081452	2.2e-06	A	T
2_8052945	8052945	2.22e-06	A	G
2_8098901	8098901	2.65e-06	C	T
2_8100276	8100276	2.79e-06	A	C
2_8111952	8111952	2.88e-06	T	C
2_8093010	8093010	2.9e-06	C	T
2_8103146	8103146	3.16e-06	T	C
2_8084393	8084393	3.43e-06	T	C
2_8088352	8088352	3.46e-06	C	T
2_8116316	8116316	3.56e-06	C	G
2_8089386	8089386	3.61e-06	T	A
2_8081408	8081408	3.62e-06	A	T
2_8100297	8100297	3.67e-06	C	T
2_8115515	8115515	3.88e-06	T	C
2_8105918	8105918	3.9e-06	T	G
2_8088974	8088974	3.96e-06	T	C
2_8085540	8085540	4.15e-06	A	G
2_8105693	8105693	5.03e-06	G	A
2_8103147	8103147	5.19e-06	G	A
2_8089348	8089348	5.84e-06	G	A
2_8092173	8092173	5.91e-06	A	G
2_8115566	8115566	6.01e-06	T	C
2_8105284	8105284	6.15e-06	G	A
2_8115711	8115711	7.21e-06	C	T
2_8097486	8097486	7.4e-06	T	C
2_8052372	8052372	7.82e-06	A	G
2_8092631	8092631	7.85e-06	G	A
2_8110271	8110271	8.22e-06	T	C
2_8110267	8110267	8.84e-06	G	A
2_8105309	8105309	1.07e-05	T	C
2_8086245	8086245	1.2e-05	G	A
2_8111742	8111742	1.22e-05	C	T
2_8095731	8095731	1.29e-05	T	C
2_8110866	8110866	1.41e-05	C	G
2_8121172	8121172	1.45e-05	C	A
2_8092372	8092372	1.47e-05	T	C
2_8080629	8080629	2.06e-05	T	C
2_8084398	8084398	2.08e-05	A	G
2_8090939	8090939	2.12e-05	G	A
2_8065500	8065500	2.6e-05	C	T
2_8080587	8080587	2.77e-05	A	G
2_8090903	8090903	2.77e-05	G	A
2_8050717	8050717	3.1e-05	C	A
2_8064600	8064600	3.11e-05	C	A
2_8112759	8112759	3.11e-05	C	A
2_8049462	8049462	3.17e-05	A	C
2_8111935	8111935	3.27e-05	A	G
2_8085355	8085355	3.46e-05	A	T
2_8100888	8100888	3.48e-05	A	G
2_8059862	8059862	3.75e-05	G	A
2_8115056	8115056	3.76e-05	C	T
2_8105417	8105417	3.87e-05	G	A
2_8065458	8065458	4.01e-05	C	T
2_8104959	8104959	4.34e-05	G	T
2_8116829	8116829	4.67e-05	C	A
2_8084024	8084024	4.85e-05	A	T
2_8130597	8130597	4.97e-05	G	T
2_8110873	8110873	5.05e-05	G	T
2_8074445	8074445	5.25e-05	T	C
2_8090886	8090886	5.45e-05	A	T
2_8092889	8092889	5.73e-05	C	T
2_8113029	8113029	5.8e-05	A	G
2_8112620	8112620	6.03e-05	A	G
2_8096881	8096881	6.21e-05	T	C
2_8114439	8114439	7.01e-05	T	C
2_8092892	8092892	7.32e-05	A	G
2_8085850	8085850	7.67e-05	C	A
2_8080588	8080588	7.92e-05	A	G
2_8108666	8108666	8.52e-05	C	T
2_8096391	8096391	8.77e-05	G	A
2_8066734	8066734	9.69e-05	T	A
2_8111698	8111698	9.86e-05	A	T
2_8104092	8104092	0.000103778	T	C
2_8137756	8137756	0.000106832	G	A
2_8095219	8095219	0.000107569	C	T
2_8113789	8113789	0.00011522	T	C
2_8044138	8044138	0.000127609	T	C
2_8080593	8080593	0.000128343	G	T
2_8138172	8138172	0.000137526	T	C
2_8118371	8118371	0.000141467	G	T
2_8110818	8110818	0.000157654	A	T
2_8076719	8076719	0.000157741	A	C
2_8110913	8110913	0.000160734	T	C
2_8049719	8049719	0.000161324	T	G
2_8092363	8092363	0.000162439	G	A
2_8095287	8095287	0.000183092	G	A
2_8070602	8070602	0.000188306	A	G
2_8115152	8115152	0.000194771	A	C
2_8104109	8104109	0.00020408	T	A
2_8110255	8110255	0.00020493	A	G
2_8110254	8110254	0.000210527	T	C
2_8134921	8134921	0.000226582	G	A
2_8103090	8103090	0.00023278	T	A
2_8084067	8084067	0.000238032	A	C
2_8095164	8095164	0.00026336	T	A
2_8086766	8086766	0.000281487	T	C
2_8049584	8049584	0.000286985	A	C
2_8142581	8142581	0.000296419	A	G
2_8115042	8115042	0.000299286	C	A
2_8049585	8049585	0.000324113	A	T
2_8096295	8096295	0.000335182	G	A
2_8065401	8065401	0.000374866	A	T
2_8086078	8086078	0.000381101	G	A
2_8087031	8087031	0.000415825	G	T
2_8142375	8142375	0.000457881	A	G
2_8096695	8096695	0.000702048	G	A
2_8121228	8121228	0.000716196	C	T
2_8105009	8105009	0.000768987	T	C
2_8064744	8064744	0.000803879	G	A
2_8111835	8111835	0.000920262	T	A
2_8103952	8103952	0.000934635	T	C
2_8081482	8081482	0.00101077	T	C
2_8078181	8078181	0.00107145	T	A
2_8044382	8044382	0.00109013	C	T
2_8045597	8045597	0.00144695	C	T
2_8070657	8070657	0.00152907	G	T
2_8064883	8064883	0.0016967	A	C
2_8110299	8110299	0.00178073	A	T
2_8137696	8137696	0.00194597	T	C
2_8099531	8099531	0.00226671	G	A
2_8102356	8102356	0.00254131	G	A
2_8104436	8104436	0.00255816	G	A
2_8104358	8104358	0.00289845	C	A
2_8100604	8100604	0.00368364	C	A
2_8105652	8105652	0.0037205	G	A
2_8139621	8139621	0.00419658	T	C
2_8120792	8120792	0.00446967	A	G
2_8096404	8096404	0.00448071	G	A
2_8061647	8061647	0.00449332	A	G
2_8084323	8084323	0.00503473	G	A
2_8052790	8052790	0.00530625	A	G
2_8104450	8104450	0.00560989	C	T
2_8070008	8070008	0.00572887	C	T
2_8060774	8060774	0.00632815	G	T
2_8111824	8111824	0.00689487	T	C
2_8088774	8088774	0.00804322	C	T
2_8130565	8130565	0.00817643	G	T
2_8065776	8065776	0.0102042	T	C
2_8098312	8098312	0.0105758	G	T
2_8076158	8076158	0.0111418	G	A
2_8088427	8088427	0.0136525	C	T
2_8120085	8120085	0.0144275	C	T
2_8112787	8112787	0.0148125	T	A
2_8120847	8120847	0.0162851	A	C
2_8133096	8133096	0.0228185	A	T
2_8076513	8076513	0.0246176	G	A
2_8044029	8044029	0.0260104	C	A
2_8076777	8076777	0.0271848	T	G
2_8130472	8130472	0.0286084	C	T
2_8100768	8100768	0.0293906	C	T
2_8098418	8098418	0.0320966	G	A
2_8045609	8045609	0.0369753	G	A
2_8118476	8118476	0.0387949	A	T
2_8133278	8133278	0.0398427	T	C
2_8093478	8093478	0.0445862	T	C
2_8133035	8133035	0.0449992	A	T
2_8110955	8110955	0.0518369	C	T
2_8076897	8076897	0.0525206	G	A
2_8063647	8063647	0.0552417	T	G
2_8049946	8049946	0.0700828	T	C
2_8098756	8098756	0.0702132	G	A
2_8049901	8049901	0.0731987	C	A
2_8067727	8067727	0.0738204	G	T
2_8044216	8044216	0.0772104	C	A
2_8088580	8088580	0.0775836	T	C
2_8047897	8047897	0.0805853	C	T
2_8102054	8102054	0.0807542	T	A
2_8066904	8066904	0.082066	A	G
2_8114415	8114415	0.0830727	C	T
2_8105136	8105136	0.0839513	A	G
2_8049418	8049418	0.0881115	C	A
2_8121329	8121329	0.0881371	G	T
2_8130525	8130525	0.0890604	C	T
2_8051996	8051996	0.0907884	A	G
2_8141225	8141225	0.121468	C	A
2_8104291	8104291	0.121561	G	A
2_8113308	8113308	0.122219	C	A
2_8104140	8104140	0.140716	C	G
2_8103117	8103117	0.150979	C	T
2_8111909	8111909	0.151854	G	A
2_8084674	8084674	0.156953	G	C
2_8104132	8104132	0.159627	G	A
2_8048841	8048841	0.160981	G	A
2_8080736	8080736	0.163508	G	A
2_8063186	8063186	0.167545	T	C
2_8105566	8105566	0.177983	A	T
2_8088155	8088155	0.180569	A	G
2_8121295	8121295	0.185532	G	A
2_8130543	8130543	0.18938	T	A
2_8098878	8098878	0.191423	C	G
2_8068056	8068056	0.19941	G	A
2_8111868	8111868	0.216961	C	T
2_8066899	8066899	0.226387	G	A
2_8095099	8095099	0.257302	T	C
2_8100991	8100991	0.25797	G	T
2_8099530	8099530	0.263476	A	G
2_8105968	8105968	0.264733	G	A
2_8105222	8105222	0.266341	C	T
2_8091575	8091575	0.275295	A	G
2_8101042	8101042	0.285882	G	A
2_8116558	8116558	0.290334	G	T
2_8072208	8072208	0.293311	C	A
2_8116559	8116559	0.2958	C	T
2_8100894	8100894	0.298382	A	G
2_8104664	8104664	0.30845	C	T
2_8104600	8104600	0.309688	T	C
2_8098154	8098154	0.316863	G	C
2_8086199	8086199	0.340102	G	A
2_8121327	8121327	0.341215	G	A
2_8130553	8130553	0.341524	A	C
2_8052333	8052333	0.347126	C	T
2_8100869	8100869	0.348253	C	T
2_8130514	8130514	0.358805	C	G
2_8114382	8114382	0.374318	C	A
2_8103406	8103406	0.378935	C	A
2_8054278	8054278	0.379534	C	T
2_8100628	8100628	0.388341	T	C
2_8095802	8095802	0.391726	T	G
2_8083246	8083246	0.397522	C	A
2_8114929	8114929	0.404775	A	G
2_8049949	8049949	0.40737	C	T
2_8101037	8101037	0.409032	A	T
2_8052703	8052703	0.41468	C	T
2_8069144	8069144	0.415213	A	G
2_8105062	8105062	0.417407	A	T
2_8054326	8054326	0.421831	A	T
2_8048892	8048892	0.426231	C	T
2_8044549	8044549	0.438366	G	A
2_8121291	8121291	0.438643	T	A
2_8105695	8105695	0.438957	C	T
2_8068569	8068569	0.442363	C	A
2_8100714	8100714	0.447129	C	T
2_8095428	8095428	0.456322	G	A
2_8116517	8116517	0.468765	A	T
2_8101884	8101884	0.474458	C	T
2_8100975	8100975	0.481442	G	A
2_8100876	8100876	0.494937	G	A
2_8111598	8111598	0.50219	G	C
2_8132904	8132904	0.521507	T	A
2_8103286	8103286	0.525945	G	T
2_8103866	8103866	0.535534	T	C
2_8091918	8091918	0.549995	G	T
2_8093451	8093451	0.550993	C	T
2_8070685	8070685	0.558986	C	T
2_8140431	8140431	0.56046	G	A
2_8089417	8089417	0.571979	T	G
2_8086243	8086243	0.576832	A	G
2_8115771	8115771	0.588656	A	G
2_8092574	8092574	0.58932	C	A
2_8100703	8100703	0.595109	C	A
2_8101477	8101477	0.599267	G	T
2_8069878	8069878	0.601677	G	A
2_8050064	8050064	0.603	C	T
2_8115737	8115737	0.604163	C	T
2_8103643	8103643	0.604558	T	G
2_8100902	8100902	0.604635	G	T
2_8101261	8101261	0.605958	G	A
2_8104038	8104038	0.608481	G	T
2_8083162	8083162	0.61174	A	C
2_8097493	8097493	0.613644	A	G
2_8048806	8048806	0.626538	G	A
2_8070324	8070324	0.627156	G	A
2_8110755	8110755	0.628678	G	A
2_8110801	8110801	0.630501	A	T
2_8121063	8121063	0.636747	T	A
2_8101965	8101965	0.655587	C	T
2_8101197	8101197	0.663095	G	A
2_8111753	8111753	0.663735	G	C
2_8103564	8103564	0.667749	G	A
2_8102417	8102417	0.671096	C	T
2_8100492	8100492	0.671308	G	T
2_8120850	8120850	0.675407	C	A
2_8069630	8069630	0.680038	A	C
2_8099549	8099549	0.689806	T	A
2_8084301	8084301	0.706358	G	A
2_8110119	8110119	0.709558	G	A
2_8083093	8083093	0.729841	C	G
2_8101784	8101784	0.736348	A	G
2_8110958	8110958	0.736779	A	T
2_8085503	8085503	0.738022	T	C
2_8049786	8049786	0.742893	G	A
2_8098755	8098755	0.76645	T	A
2_8101275	8101275	0.777011	C	A
2_8043738	8043738	0.777168	G	A
2_8110092	8110092	0.778542	G	T
2_8070578	8070578	0.782383	G	A
2_8095749	8095749	0.799768	G	A
2_8104972	8104972	0.805492	A	C
2_8110956	8110956	0.808049	G	T
2_8102793	8102793	0.816514	C	T
2_8105691	8105691	0.819692	C	T
2_8093823	8093823	0.822931	G	A
2_8100477	8100477	0.832812	C	T
2_8103066	8103066	0.83474	G	A
2_8110434	8110434	0.848472	G	A
2_8100404	8100404	0.853096	C	T
2_8100522	8100522	0.857817	G	C
2_8102293	8102293	0.863025	C	T
2_8098482	8098482	0.88479	C	T
2_8101887	8101887	0.886908	C	T
2_8121178	8121178	0.887495	T	C
2_8080498	8080498	0.889361	C	T
2_8110044	8110044	0.897092	C	T
2_8105895	8105895	0.901694	C	T
2_8100361	8100361	0.901853	C	T
2_8100249	8100249	0.902409	C	T
2_8086655	8086655	0.930293	G	A
2_8050016	8050016	0.931588	G	A
2_8115580	8115580	0.9468	G	A
2_8103120	8103120	0.969167	G	T
2_8069048	8069048	0.969938	G	C
2_8081353	8081353	0.971605	T	A
2_8081354	8081354	0.971605	T	A
2_8098191	8098191	0.974471	C	A
2_8105821	8105821	0.980667	A	G
2_8090181	8090181	0.983763	C	T
2_8050132	8050132	0.987792	G	A
2_8099084	8099084	0.997516	A	C
2_8100907	8100907	0.997792	G	A
2_8111574	8111574	0.998162	A	G
2_8083104	8083104	0.999527	C	T
