# Supplementary material for: Genome-wide association study in quinoa reveals selection pattern typical for crops with a short breeding history
Source: eLife. 2022 Jul 8;11:e66873. doi: 10.7554/eLife.66873 (PMC9388097; doi:10.7554/eLife.66873)
Supplement: Figure 4—source data 1. — Green and blue dots are depicting the CqPP2C5 and CqRING. [file elife-66873-fig4-data1.xlsx]

## Sheet: Sheet1
Fig. 4a-Source data 4a
Fig. 4: Identification of candidate genes for thousand seed weight. (a) Manhattan plot from chromosome Cq8B. Green and blue dots are depicting the CqPP2C5 and the CqRING CqRING gene, respectively.
Marker	Chr	Pos	p	important
17_6185	17	6185	0.149658	na
17_6201	17	6201	0.934278	na
17_6338	17	6338	0.654185	na
17_6917	17	6917	0.9234	na
17_14203	17	14203	0.313715	na
17_14251	17	14251	0.765246	na
17_14357	17	14357	0.133013	na
17_14797	17	14797	0.00597577	na
17_15520	17	15520	0.533617	na
17_15602	17	15602	0.899924	na
17_15715	17	15715	0.631225	na
17_15724	17	15724	0.0624002	na
17_15925	17	15925	0.161308	na
17_15984	17	15984	0.929435	na
17_16272	17	16272	0.446874	na
17_16309	17	16309	0.943553	na
17_16310	17	16310	0.922605	na
17_16390	17	16390	0.556405	na
17_23715	17	23715	0.991736	na
17_24635	17	24635	0.915624	na
17_27229	17	27229	0.879141	na
17_27688	17	27688	0.512823	na
17_28549	17	28549	0.129888	na
17_37890	17	37890	0.39944	na
17_38826	17	38826	0.204986	na
17_39512	17	39512	0.236259	na
17_40046	17	40046	0.264182	na
17_40069	17	40069	0.238439	na
17_41302	17	41302	0.323497	na
17_46911	17	46911	0.283724	na
17_46920	17	46920	0.919239	na
17_47144	17	47144	0.340784	na
17_47854	17	47854	0.551197	na
17_49990	17	49990	0.392911	na
17_50044	17	50044	0.0667599	na
17_50408	17	50408	0.150942	na
17_51921	17	51921	0.545362	na
17_51926	17	51926	0.988826	na
17_52364	17	52364	0.908767	na
17_54292	17	54292	0.317383	na
17_54592	17	54592	0.0927542	na
17_56133	17	56133	0.821265	na
17_56296	17	56296	0.0316911	na
17_56347	17	56347	0.422421	na
17_57285	17	57285	0.0069855	na
17_57958	17	57958	0.726009	na
17_57975	17	57975	0.772432	na
17_58641	17	58641	0.0818538	na
17_61908	17	61908	0.45915	na
17_63838	17	63838	0.812743	na
17_64309	17	64309	0.403143	na
17_67038	17	67038	0.0794359	na
17_67335	17	67335	0.180555	na
17_67336	17	67336	0.059738	na
17_75437	17	75437	0.238528	na
17_77989	17	77989	0.657805	na
17_78454	17	78454	0.850657	na
17_78739	17	78739	0.102608	na
17_78861	17	78861	0.0428374	na
17_80663	17	80663	0.303825	na
17_82756	17	82756	0.992237	na
17_83802	17	83802	0.22904	na
17_87190	17	87190	0.0528774	na
17_88250	17	88250	0.196307	na
17_89285	17	89285	0.0825846	na
17_90344	17	90344	0.455493	na
17_97287	17	97287	0.00735032	na
17_97337	17	97337	0.0229399	na
17_97885	17	97885	0.154877	na
17_99905	17	99905	0.561627	na
17_100579	17	100579	0.383193	na
17_102595	17	102595	0.948399	na
17_104386	17	104386	0.795657	na
17_107962	17	107962	0.54128	na
17_110091	17	110091	0.242095	na
17_110975	17	110975	0.665252	na
17_111019	17	111019	0.993165	na
17_116204	17	116204	0.268562	na
17_117352	17	117352	0.852512	na
17_117631	17	117631	0.111451	na
17_117727	17	117727	0.388644	na
17_118352	17	118352	0.564765	na
17_123076	17	123076	0.837925	na
17_138595	17	138595	0.0919902	na
17_142355	17	142355	0.0630387	na
17_148070	17	148070	0.914711	na
17_149300	17	149300	0.483809	na
17_149626	17	149626	0.342908	na
17_149972	17	149972	0.131535	na
17_152739	17	152739	0.941185	na
17_153092	17	153092	0.282073	na
17_154203	17	154203	0.235318	na
17_155299	17	155299	0.406195	na
17_156081	17	156081	0.326797	na
17_156208	17	156208	0.705814	na
17_156256	17	156256	0.829402	na
17_156317	17	156317	0.660358	na
17_156322	17	156322	0.463256	na
17_156334	17	156334	0.641204	na
17_156338	17	156338	0.684425	na
17_156370	17	156370	0.350547	na
17_156389	17	156389	0.180205	na
17_156922	17	156922	0.831077	na
17_157131	17	157131	0.831684	na
17_157481	17	157481	0.595473	na
17_157500	17	157500	0.841964	na
17_157538	17	157538	0.962905	na
17_157569	17	157569	0.524462	na
17_157572	17	157572	0.516572	na
17_157579	17	157579	0.624425	na
17_158052	17	158052	0.135983	na
17_158310	17	158310	0.949402	na
17_158335	17	158335	0.760124	na
17_158434	17	158434	0.835978	na
17_158437	17	158437	0.617116	na
17_158469	17	158469	0.23524	na
17_158476	17	158476	0.732818	na
17_158479	17	158479	0.732818	na
17_158482	17	158482	0.588512	na
17_158610	17	158610	0.531649	na
17_158679	17	158679	0.954984	na
17_158695	17	158695	0.38231	na
17_158716	17	158716	0.493245	na
17_158725	17	158725	0.848299	na
17_158785	17	158785	0.624172	na
17_158800	17	158800	0.683211	na
17_159501	17	159501	0.433894	na
17_160153	17	160153	0.775022	na
17_160214	17	160214	0.881763	na
17_160215	17	160215	0.881763	na
17_160245	17	160245	0.552662	na
17_160253	17	160253	0.616424	na
17_160636	17	160636	0.828197	na
17_160642	17	160642	0.800791	na
17_161073	17	161073	0.269054	na
17_161406	17	161406	0.27519	na
17_161471	17	161471	0.926797	na
17_161472	17	161472	0.0814194	na
17_161687	17	161687	0.692719	na
17_161690	17	161690	0.993527	na
17_161692	17	161692	0.752006	na
17_163006	17	163006	0.128173	na
17_163197	17	163197	0.225925	na
17_166948	17	166948	0.105755	na
17_167307	17	167307	0.296445	na
17_167599	17	167599	0.0494453	na
17_168451	17	168451	0.797507	na
17_168782	17	168782	0.359283	na
17_168785	17	168785	0.349726	na
17_169318	17	169318	0.958511	na
17_170331	17	170331	0.596113	na
17_172851	17	172851	0.0675219	na
17_173628	17	173628	0.196984	na
17_174582	17	174582	0.0325975	na
17_175257	17	175257	0.892439	na
17_175309	17	175309	0.288052	na
17_177964	17	177964	0.922955	na
17_183350	17	183350	0.363188	na
17_183405	17	183405	0.0778198	na
17_183583	17	183583	0.811359	na
17_183670	17	183670	0.32817	na
17_185311	17	185311	0.769642	na
17_185378	17	185378	0.751635	na
17_186100	17	186100	0.98448	na
17_188672	17	188672	0.807149	na
17_188702	17	188702	0.527815	na
17_191735	17	191735	0.0930456	na
17_194271	17	194271	0.30663	na
17_195048	17	195048	0.0478495	na
17_195805	17	195805	0.0432603	na
17_196722	17	196722	0.213071	na
17_196817	17	196817	0.980428	na
17_196821	17	196821	0.99582	na
17_197462	17	197462	0.00132817	na
17_198664	17	198664	0.201324	na
17_199014	17	199014	0.0180532	na
17_199386	17	199386	0.369595	na
17_199527	17	199527	0.0793039	na
17_200148	17	200148	0.888849	na
17_200260	17	200260	0.383062	na
17_200324	17	200324	0.508223	na
17_200713	17	200713	0.50288	na
17_201559	17	201559	0.126904	na
17_201561	17	201561	0.140271	na
17_202141	17	202141	0.520559	na
17_202935	17	202935	0.00832817	na
17_203021	17	203021	0.505392	na
17_204717	17	204717	0.304683	na
17_211822	17	211822	0.631171	na
17_211834	17	211834	0.454792	na
17_216624	17	216624	0.471304	na
17_216642	17	216642	0.035393	na
17_216715	17	216715	0.0677123	na
17_216728	17	216728	0.193056	na
17_216734	17	216734	0.242942	na
17_216736	17	216736	0.229264	na
17_216745	17	216745	0.498879	na
17_216755	17	216755	0.67814	na
17_218705	17	218705	0.796643	na
17_219090	17	219090	0.687318	na
17_225481	17	225481	0.0175317	na
17_225622	17	225622	0.997097	na
17_225721	17	225721	0.676423	na
17_226194	17	226194	0.323761	na
17_226511	17	226511	0.400221	na
17_226590	17	226590	0.0864661	na
17_226596	17	226596	0.0259608	na
17_226735	17	226735	0.0726764	na
17_227710	17	227710	0.817788	na
17_227812	17	227812	0.0696139	na
17_228131	17	228131	0.446588	na
17_228268	17	228268	0.0428756	na
17_228434	17	228434	0.447307	na
17_228546	17	228546	0.437098	na
17_228782	17	228782	0.626354	na
17_232232	17	232232	0.657184	na
17_232374	17	232374	0.920511	na
17_232855	17	232855	0.800865	na
17_233018	17	233018	0.786493	na
17_235137	17	235137	0.760953	na
17_235397	17	235397	0.332977	na
17_235417	17	235417	0.0899904	na
17_235426	17	235426	0.273817	na
17_236068	17	236068	0.834637	na
17_236108	17	236108	0.791056	na
17_236195	17	236195	0.918069	na
17_236200	17	236200	0.885908	na
17_236309	17	236309	0.873753	na
17_236864	17	236864	0.273377	na
17_237006	17	237006	0.286761	na
17_237136	17	237136	0.13801	na
17_237188	17	237188	0.148667	na
17_237327	17	237327	0.94534	na
17_237446	17	237446	0.865322	na
17_237834	17	237834	0.74801	na
17_237955	17	237955	0.0809032	na
17_238193	17	238193	0.50956	na
17_238752	17	238752	0.420496	na
17_238772	17	238772	0.313722	na
17_239923	17	239923	0.0685633	na
17_244353	17	244353	0.506873	na
17_245936	17	245936	0.0603936	na
17_251069	17	251069	0.132354	na
17_252223	17	252223	0.733741	na
17_252287	17	252287	0.434283	na
17_262697	17	262697	0.104692	na
17_262728	17	262728	0.252636	na
17_262749	17	262749	0.058997	na
17_262754	17	262754	0.144752	na
17_262884	17	262884	0.0107721	na
17_264002	17	264002	0.30068	na
17_264165	17	264165	0.268163	na
17_265426	17	265426	0.894231	na
17_265446	17	265446	0.576927	na
17_265493	17	265493	0.593212	na
17_268560	17	268560	0.609995	na
17_268629	17	268629	0.990876	na
17_268643	17	268643	0.361579	na
17_277447	17	277447	0.17942	na
17_277492	17	277492	0.788575	na
17_277520	17	277520	0.317041	na
17_277553	17	277553	0.518145	na
17_277564	17	277564	0.269781	na
17_277583	17	277583	0.417121	na
17_277587	17	277587	0.355314	na
17_278049	17	278049	0.945546	na
17_278066	17	278066	0.991265	na
17_278082	17	278082	0.819152	na
17_278204	17	278204	0.421745	na
17_278215	17	278215	0.686194	na
17_278544	17	278544	0.769174	na
17_278551	17	278551	0.477543	na
17_278594	17	278594	0.928152	na
17_278596	17	278596	0.935576	na
17_278875	17	278875	0.891186	na
17_278909	17	278909	0.4402	na
17_278910	17	278910	0.4402	na
17_278918	17	278918	0.733491	na
17_278924	17	278924	0.546206	na
17_278931	17	278931	0.470636	na
17_278933	17	278933	0.843215	na
17_278958	17	278958	0.718224	na
17_278983	17	278983	0.951989	na
17_279277	17	279277	0.838513	na
17_279515	17	279515	0.186131	na
17_279583	17	279583	0.633338	na
17_280695	17	280695	0.441406	na
17_280745	17	280745	0.590304	na
17_280786	17	280786	0.571336	na
17_280870	17	280870	0.0156369	na
17_280871	17	280871	0.538279	na
17_280927	17	280927	0.49695	na
17_280940	17	280940	0.177907	na
17_280952	17	280952	0.931296	na
17_280977	17	280977	0.961568	na
17_280988	17	280988	0.758605	na
17_281011	17	281011	0.964833	na
17_281059	17	281059	0.384128	na
17_281239	17	281239	0.187895	na
17_281339	17	281339	0.947614	na
17_281440	17	281440	0.452617	na
17_281497	17	281497	0.908012	na
17_281571	17	281571	0.182882	na
17_281588	17	281588	0.172057	na
17_281607	17	281607	0.140379	na
17_281609	17	281609	0.152883	na
17_281633	17	281633	0.803701	na
17_281662	17	281662	0.968561	na
17_281667	17	281667	0.255186	na
17_281669	17	281669	0.950063	na
17_281687	17	281687	0.208015	na
17_281693	17	281693	0.580652	na
17_281708	17	281708	0.444775	na
17_281712	17	281712	0.379209	na
17_281714	17	281714	0.8371	na
17_281720	17	281720	0.656385	na
17_281865	17	281865	0.594655	na
17_281868	17	281868	0.621492	na
17_281883	17	281883	0.210237	na
17_281911	17	281911	0.39214	na
17_281989	17	281989	0.736277	na
17_281990	17	281990	0.151803	na
17_282060	17	282060	0.579137	na
17_282114	17	282114	0.85813	na
17_282169	17	282169	0.379329	na
17_282471	17	282471	0.247714	na
17_282568	17	282568	0.578682	na
17_282628	17	282628	0.470045	na
17_282635	17	282635	0.762252	na
17_282639	17	282639	0.517612	na
17_282654	17	282654	0.523569	na
17_282665	17	282665	0.319631	na
17_294389	17	294389	0.937939	na
17_294393	17	294393	0.35344	na
17_294401	17	294401	0.467182	na
17_294415	17	294415	0.890391	na
17_294459	17	294459	0.52045	na
17_294486	17	294486	0.545718	na
17_294489	17	294489	0.527922	na
17_294500	17	294500	0.346999	na
17_294505	17	294505	0.25159	na
17_294515	17	294515	0.505419	na
17_294556	17	294556	0.566645	na
17_294640	17	294640	0.531835	na
17_294756	17	294756	0.481551	na
17_294805	17	294805	0.479832	na
17_295001	17	295001	0.8518	na
17_295002	17	295002	0.935478	na
17_295018	17	295018	0.625318	na
17_295097	17	295097	0.750559	na
17_295189	17	295189	0.362395	na
17_295293	17	295293	0.559134	na
17_295402	17	295402	0.646513	na
17_295459	17	295459	0.977353	na
17_295473	17	295473	0.918561	na
17_295481	17	295481	0.327123	na
17_295484	17	295484	0.820513	na
17_295496	17	295496	0.90622	na
17_295547	17	295547	0.426047	na
17_295666	17	295666	0.732888	na
17_295750	17	295750	0.417588	na
17_295777	17	295777	0.227076	na
17_295828	17	295828	0.264114	na
17_295939	17	295939	0.24151	na
17_295946	17	295946	0.400076	na
17_295956	17	295956	0.256155	na
17_295963	17	295963	0.243679	na
17_295972	17	295972	0.190259	na
17_295978	17	295978	0.869455	na
17_295993	17	295993	0.596433	na
17_296091	17	296091	0.866675	na
17_296116	17	296116	0.943595	na
17_296126	17	296126	0.84189	na
17_296133	17	296133	0.290311	na
17_296134	17	296134	0.308715	na
17_296143	17	296143	0.287903	na
17_296419	17	296419	0.557064	na
17_297006	17	297006	0.123588	na
17_297249	17	297249	0.269164	na
17_299821	17	299821	0.926418	na
17_301729	17	301729	0.81494	na
17_301922	17	301922	0.793725	na
17_302241	17	302241	0.192811	na
17_302483	17	302483	0.925169	na
17_302503	17	302503	0.346215	na
17_303537	17	303537	0.290528	na
17_306984	17	306984	0.753302	na
17_311849	17	311849	0.733261	na
17_311957	17	311957	0.422085	na
17_312518	17	312518	0.175706	na
17_316448	17	316448	0.0979167	na
17_318270	17	318270	0.867903	na
17_318319	17	318319	0.136447	na
17_319951	17	319951	0.0102341	na
17_322577	17	322577	0.311546	na
17_323981	17	323981	0.0802492	na
17_324158	17	324158	0.149645	na
17_325226	17	325226	0.0539059	na
17_325236	17	325236	0.592765	na
17_332342	17	332342	0.872715	na
17_332343	17	332343	0.872715	na
17_333356	17	333356	0.489118	na
17_334150	17	334150	0.032429	na
17_334154	17	334154	0.0405224	na
17_335103	17	335103	0.309581	na
17_335525	17	335525	0.692999	na
17_336008	17	336008	0.113107	na
17_336057	17	336057	0.0168405	na
17_336300	17	336300	0.257831	na
17_337908	17	337908	0.638735	na
17_337942	17	337942	0.819515	na
17_337986	17	337986	0.286255	na
17_338014	17	338014	0.358981	na
17_338739	17	338739	0.240157	na
17_338749	17	338749	0.267709	na
17_338791	17	338791	0.211293	na
17_339079	17	339079	0.750935	na
17_339208	17	339208	0.785771	na
17_339546	17	339546	0.490675	na
17_339737	17	339737	0.0662298	na
17_340139	17	340139	0.225601	na
17_340281	17	340281	0.269951	na
17_340480	17	340480	0.828148	na
17_340627	17	340627	0.364482	na
17_340741	17	340741	0.315153	na
17_341120	17	341120	0.726314	na
17_342970	17	342970	0.0698225	na
17_343083	17	343083	0.627032	na
17_343857	17	343857	0.0513267	na
17_344524	17	344524	0.273615	na
17_349100	17	349100	0.531628	na
17_359295	17	359295	0.987352	na
17_359519	17	359519	0.384428	na
17_370306	17	370306	0.231588	na
17_373638	17	373638	0.79857	na
17_374895	17	374895	0.46883	na
17_374900	17	374900	0.410416	na
17_374967	17	374967	0.291833	na
17_376667	17	376667	0.952965	na
17_376938	17	376938	0.231223	na
17_377272	17	377272	0.509508	na
17_377493	17	377493	0.42746	na
17_377800	17	377800	0.968692	na
17_378329	17	378329	0.163069	na
17_379238	17	379238	0.224769	na
17_379589	17	379589	0.192064	na
17_379965	17	379965	0.118765	na
17_380455	17	380455	0.494702	na
17_380756	17	380756	0.000107813	na
17_382640	17	382640	0.731887	na
17_383727	17	383727	0.749896	na
17_384348	17	384348	0.714128	na
17_385395	17	385395	0.672669	na
17_387666	17	387666	0.411046	na
17_388580	17	388580	0.648279	na
17_389044	17	389044	0.0727345	na
17_389058	17	389058	0.461203	na
17_389078	17	389078	0.816806	na
17_391565	17	391565	0.476661	na
17_391821	17	391821	0.36847	na
17_392374	17	392374	0.145783	na
17_393464	17	393464	0.740786	na
17_393603	17	393603	0.330428	na
17_393609	17	393609	0.337488	na
17_393849	17	393849	0.970011	na
17_394496	17	394496	0.868435	na
17_395750	17	395750	0.907789	na
17_395788	17	395788	0.263356	na
17_395790	17	395790	0.644282	na
17_395953	17	395953	0.908192	na
17_397828	17	397828	0.673069	na
17_398269	17	398269	0.464697	na
17_398478	17	398478	0.963678	na
17_398618	17	398618	0.673559	na
17_399252	17	399252	0.875857	na
17_399265	17	399265	0.507056	na
17_399444	17	399444	0.694852	na
17_400083	17	400083	0.335591	na
17_400186	17	400186	0.307018	na
17_400193	17	400193	0.57157	na
17_402078	17	402078	0.956729	na
17_403090	17	403090	0.738485	na
17_403174	17	403174	0.0522525	na
17_403377	17	403377	0.126364	na
17_404065	17	404065	0.23214	na
17_404174	17	404174	0.325366	na
17_404246	17	404246	0.242908	na
17_404307	17	404307	0.247462	na
17_404807	17	404807	0.714912	na
17_405547	17	405547	0.585609	na
17_405767	17	405767	0.0694315	na
17_406018	17	406018	0.114959	na
17_406967	17	406967	0.289076	na
17_407352	17	407352	0.220198	na
17_408744	17	408744	0.670273	na
17_409495	17	409495	0.756528	na
17_409625	17	409625	0.317775	na
17_410346	17	410346	0.801263	na
17_410439	17	410439	0.814391	na
17_410783	17	410783	0.50401	na
17_411643	17	411643	0.6255	na
17_412663	17	412663	0.237288	na
17_412751	17	412751	0.433936	na
17_412787	17	412787	0.245333	na
17_413872	17	413872	0.0513412	na
17_415512	17	415512	0.689058	na
17_416036	17	416036	0.944568	na
17_416384	17	416384	0.899712	na
17_418521	17	418521	0.447871	na
17_418765	17	418765	0.956356	na
17_418802	17	418802	0.997032	na
17_420295	17	420295	0.162526	na
17_420472	17	420472	0.577331	na
17_420478	17	420478	0.671247	na
17_421638	17	421638	0.954813	na
17_421771	17	421771	0.508217	na
17_421790	17	421790	0.775761	na
17_421938	17	421938	0.376992	na
17_422007	17	422007	0.370875	na
17_422331	17	422331	0.238698	na
17_422560	17	422560	0.721552	na
17_422575	17	422575	0.355632	na
17_424324	17	424324	0.230846	na
17_424456	17	424456	0.214117	na
17_424846	17	424846	0.344196	na
17_424907	17	424907	0.55514	na
17_424926	17	424926	0.924516	na
17_425252	17	425252	0.293155	na
17_425260	17	425260	0.477302	na
17_425310	17	425310	0.909825	na
17_425396	17	425396	0.597667	na
17_425486	17	425486	0.928516	na
17_425487	17	425487	0.776116	na
17_425634	17	425634	0.621478	na
17_425645	17	425645	0.858039	na
17_425658	17	425658	0.623083	na
17_425713	17	425713	0.924245	na
17_425848	17	425848	0.5653	na
17_425851	17	425851	0.593501	na
17_425897	17	425897	0.504039	na
17_425961	17	425961	0.450244	na
17_425969	17	425969	0.711388	na
17_426039	17	426039	0.206698	na
17_426125	17	426125	0.680017	na
17_426154	17	426154	0.271063	na
17_426203	17	426203	0.773614	na
17_426204	17	426204	0.783527	na
17_426209	17	426209	0.723809	na
17_426223	17	426223	0.460004	na
17_426372	17	426372	0.48682	na
17_426373	17	426373	0.543375	na
17_427738	17	427738	0.759382	na
17_427761	17	427761	0.249013	na
17_428031	17	428031	0.533601	na
17_428365	17	428365	0.783078	na
17_428366	17	428366	0.845396	na
17_429255	17	429255	0.841955	na
17_429917	17	429917	0.420553	na
17_430037	17	430037	0.324871	na
17_430840	17	430840	0.103326	na
17_430881	17	430881	0.797648	na
17_431142	17	431142	0.462506	na
17_431408	17	431408	0.361698	na
17_431639	17	431639	0.665283	na
17_431796	17	431796	0.420359	na
17_431888	17	431888	0.539258	na
17_432421	17	432421	0.949941	na
17_434106	17	434106	0.115853	na
17_434115	17	434115	0.122508	na
17_434118	17	434118	0.13473	na
17_434119	17	434119	0.108658	na
17_434361	17	434361	0.259663	na
17_435051	17	435051	0.430405	na
17_435099	17	435099	0.97566	na
17_435471	17	435471	0.727635	na
17_435778	17	435778	0.66093	na
17_436147	17	436147	0.941749	na
17_436738	17	436738	0.528457	na
17_436891	17	436891	0.394914	na
17_437064	17	437064	0.438103	na
17_437337	17	437337	0.27785	na
17_437363	17	437363	0.851889	na
17_437424	17	437424	0.910851	na
17_437425	17	437425	0.910851	na
17_437520	17	437520	0.868994	na
17_438263	17	438263	0.479257	na
17_438271	17	438271	0.49762	na
17_442841	17	442841	0.326506	na
17_444911	17	444911	0.580537	na
17_445722	17	445722	0.304621	na
17_446635	17	446635	0.658499	na
17_448733	17	448733	0.697173	na
17_449708	17	449708	0.1931	na
17_449881	17	449881	0.699454	na
17_450737	17	450737	0.88181	na
17_450738	17	450738	0.88181	na
17_450830	17	450830	0.618832	na
17_450882	17	450882	0.239776	na
17_451133	17	451133	0.238451	na
17_451317	17	451317	0.866057	na
17_451880	17	451880	0.787565	na
17_452028	17	452028	0.264461	na
17_452546	17	452546	0.732896	na
17_452670	17	452670	0.923113	na
17_454857	17	454857	0.327147	na
17_455891	17	455891	0.0142842	na
17_456739	17	456739	0.435307	na
17_456793	17	456793	0.930829	na
17_458638	17	458638	0.860052	na
17_458775	17	458775	0.346837	na
17_460428	17	460428	0.505782	na
17_460594	17	460594	0.550453	na
17_460757	17	460757	0.462912	na
17_461863	17	461863	0.69283	na
17_463180	17	463180	0.834377	na
17_463296	17	463296	0.848667	na
17_463857	17	463857	0.450041	na
17_463858	17	463858	0.409571	na
17_465687	17	465687	0.220902	na
17_466002	17	466002	0.0974302	na
17_467142	17	467142	0.783435	na
17_467148	17	467148	0.735191	na
17_469916	17	469916	0.751404	na
17_469926	17	469926	0.328773	na
17_469964	17	469964	0.809483	na
17_472368	17	472368	0.659454	na
17_472479	17	472479	0.839973	na
17_472486	17	472486	0.859744	na
17_472489	17	472489	0.414608	na
17_472492	17	472492	0.474131	na
17_472500	17	472500	0.783711	na
17_472504	17	472504	0.989644	na
17_472513	17	472513	0.991254	na
17_472526	17	472526	0.669102	na
17_472542	17	472542	0.20083	na
17_472554	17	472554	0.217089	na
17_472561	17	472561	0.039899	na
17_472563	17	472563	0.812459	na
17_472567	17	472567	0.039899	na
17_472586	17	472586	0.722717	na
17_472594	17	472594	0.38117	na
17_472595	17	472595	0.0925764	na
17_472618	17	472618	0.218702	na
17_472633	17	472633	0.501791	na
17_472646	17	472646	0.616227	na
17_472683	17	472683	0.0563784	na
17_472691	17	472691	0.682092	na
17_472697	17	472697	0.0707462	na
17_472712	17	472712	0.863906	na
17_472744	17	472744	0.451319	na
17_472759	17	472759	0.724243	na
17_472788	17	472788	0.0442879	na
17_472806	17	472806	0.0972971	na
17_472846	17	472846	0.127593	na
17_472878	17	472878	0.140756	na
17_472893	17	472893	0.120831	na
17_473035	17	473035	0.649487	na
17_473505	17	473505	0.170139	na
17_474139	17	474139	0.343602	na
17_474220	17	474220	0.279589	na
17_474998	17	474998	0.954051	na
17_475448	17	475448	0.213707	na
17_475512	17	475512	0.26664	na
17_476160	17	476160	0.239916	na
17_476305	17	476305	0.491435	na
17_476777	17	476777	0.276904	na
17_478430	17	478430	0.798185	na
17_479949	17	479949	0.634721	na
17_480463	17	480463	0.768341	na
17_480466	17	480466	0.591229	na
17_480575	17	480575	0.73785	na
17_480924	17	480924	0.616395	na
17_481004	17	481004	0.912236	na
17_482050	17	482050	0.855633	na
17_482123	17	482123	0.696311	na
17_482223	17	482223	0.483264	na
17_482341	17	482341	0.228116	na
17_482520	17	482520	0.335478	na
17_482598	17	482598	0.44143	na
17_482609	17	482609	0.684508	na
17_482801	17	482801	0.969232	na
17_483849	17	483849	0.378777	na
17_484045	17	484045	0.091685	na
17_484173	17	484173	0.7935	na
17_485322	17	485322	0.341506	na
17_485457	17	485457	0.609265	na
17_485662	17	485662	0.474223	na
17_487367	17	487367	0.168022	na
17_487377	17	487377	0.844793	na
17_488707	17	488707	0.284175	na
17_488802	17	488802	0.691035	na
17_488899	17	488899	0.509689	na
17_489651	17	489651	0.888946	na
17_490170	17	490170	0.40363	na
17_490412	17	490412	0.472367	na
17_490744	17	490744	0.216054	na
17_491406	17	491406	0.456121	na
17_491818	17	491818	0.923849	na
17_491955	17	491955	0.589834	na
17_492276	17	492276	0.523077	na
17_492675	17	492675	0.341538	na
17_493138	17	493138	0.461664	na
17_494897	17	494897	0.091518	na
17_495200	17	495200	0.168434	na
17_495289	17	495289	0.502176	na
17_495469	17	495469	0.557513	na
17_495684	17	495684	0.293272	na
17_495789	17	495789	0.727975	na
17_495799	17	495799	0.155913	na
17_495924	17	495924	0.985213	na
17_495980	17	495980	0.903608	na
17_497223	17	497223	0.410178	na
17_497870	17	497870	0.936754	na
17_497955	17	497955	0.68369	na
17_499508	17	499508	0.911603	na
17_499568	17	499568	0.53253	na
17_499638	17	499638	0.567032	na
17_499867	17	499867	0.39919	na
17_499911	17	499911	0.173011	na
17_500078	17	500078	0.16096	na
17_500729	17	500729	0.475375	na
17_500772	17	500772	0.414136	na
17_500829	17	500829	0.520374	na
17_501618	17	501618	0.0342033	na
17_502193	17	502193	0.205991	na
17_502879	17	502879	0.140714	na
17_502923	17	502923	0.379054	na
17_505449	17	505449	0.224715	na
17_507614	17	507614	0.961198	na
17_507617	17	507617	0.964764	na
17_507692	17	507692	0.484459	na
17_507832	17	507832	0.638713	na
17_508124	17	508124	0.396689	na
17_508196	17	508196	0.204815	na
17_508319	17	508319	0.357435	na
17_508406	17	508406	0.406566	na
17_509194	17	509194	0.403936	na
17_509199	17	509199	0.366236	na
17_509201	17	509201	0.366236	na
17_509206	17	509206	0.247872	na
17_509215	17	509215	0.513032	na
17_509220	17	509220	0.505334	na
17_510363	17	510363	0.182356	na
17_510427	17	510427	0.226576	na
17_511476	17	511476	0.714342	na
17_511655	17	511655	0.955384	na
17_513781	17	513781	0.543208	na
17_513791	17	513791	0.952952	na
17_513833	17	513833	0.199736	na
17_514907	17	514907	0.936191	na
17_515724	17	515724	0.207341	na
17_515764	17	515764	0.798863	na
17_516390	17	516390	0.472684	na
17_517000	17	517000	0.635134	na
17_517029	17	517029	0.760648	na
17_518314	17	518314	0.238644	na
17_520327	17	520327	0.344232	na
17_520383	17	520383	0.443324	na
17_521614	17	521614	0.405092	na
17_521660	17	521660	0.68721	na
17_522366	17	522366	0.818964	na
17_523074	17	523074	0.765249	na
17_524885	17	524885	0.211872	na
17_524909	17	524909	0.698782	na
17_524981	17	524981	0.663328	na
17_524982	17	524982	0.684432	na
17_524986	17	524986	0.727177	na
17_524992	17	524992	0.968482	na
17_525689	17	525689	0.768695	na
17_527366	17	527366	0.725247	na
17_527620	17	527620	0.256192	na
17_528076	17	528076	0.808258	na
17_530568	17	530568	0.335457	na
17_530921	17	530921	0.975309	na
17_531640	17	531640	0.596587	na
17_532992	17	532992	0.756636	na
17_533166	17	533166	0.574651	na
17_533795	17	533795	0.996854	na
17_533927	17	533927	0.633805	na
17_534052	17	534052	0.525672	na
17_534472	17	534472	0.7427	na
17_534582	17	534582	0.997549	na
17_536979	17	536979	0.45905	na
17_539506	17	539506	0.175635	na
17_541673	17	541673	0.673868	na
17_545741	17	545741	0.254625	na
17_550306	17	550306	0.888453	na
17_551291	17	551291	0.361463	na
17_552917	17	552917	0.261592	na
17_553110	17	553110	0.173784	na
17_553909	17	553909	0.257443	na
17_554212	17	554212	0.8263	na
17_556438	17	556438	0.92063	na
17_556612	17	556612	0.212171	na
17_557243	17	557243	0.393583	na
17_557415	17	557415	0.690151	na
17_557483	17	557483	0.466923	na
17_557487	17	557487	0.444034	na
17_557962	17	557962	0.761036	na
17_558019	17	558019	0.14683	na
17_558052	17	558052	0.71805	na
17_558055	17	558055	0.458378	na
17_558082	17	558082	0.336796	na
17_558189	17	558189	0.35382	na
17_558245	17	558245	0.676547	na
17_559653	17	559653	0.118538	na
17_560112	17	560112	0.709661	na
17_560629	17	560629	0.434048	na
17_563390	17	563390	0.758808	na
17_563527	17	563527	0.837736	na
17_564139	17	564139	0.82139	na
17_564286	17	564286	0.0155414	na
17_565387	17	565387	0.759787	na
17_566103	17	566103	0.438042	na
17_566337	17	566337	0.635583	na
17_566485	17	566485	0.536286	na
17_566848	17	566848	0.490755	na
17_567018	17	567018	0.340345	na
17_567606	17	567606	0.214203	na
17_569316	17	569316	0.519327	na
17_569864	17	569864	0.912405	na
17_572765	17	572765	0.264658	na
17_572852	17	572852	0.757356	na
17_572891	17	572891	0.245492	na
17_573008	17	573008	0.111496	na
17_574785	17	574785	0.376085	na
17_575201	17	575201	0.749904	na
17_575390	17	575390	0.33119	na
17_578192	17	578192	0.273797	na
17_578837	17	578837	0.749931	na
17_583155	17	583155	0.692865	na
17_583806	17	583806	0.996293	na
17_584070	17	584070	0.0729117	na
17_584141	17	584141	0.448392	na
17_585440	17	585440	0.645997	na
17_586184	17	586184	0.969028	na
17_587064	17	587064	0.504069	na
17_589551	17	589551	0.102271	na
17_590573	17	590573	0.516127	na
17_593675	17	593675	0.824079	na
17_594266	17	594266	0.557208	na
17_595340	17	595340	0.346343	na
17_595427	17	595427	0.682764	na
17_596219	17	596219	0.796377	na
17_596361	17	596361	0.566095	na
17_596835	17	596835	0.411681	na
17_596910	17	596910	0.271716	na
17_597251	17	597251	0.528163	na
17_597255	17	597255	0.419154	na
17_597654	17	597654	0.876001	na
17_598694	17	598694	0.836734	na
17_598792	17	598792	0.177481	na
17_598829	17	598829	0.422043	na
17_599018	17	599018	0.132103	na
17_601451	17	601451	0.429281	na
17_601862	17	601862	0.898553	na
17_603129	17	603129	0.383861	na
17_603134	17	603134	0.529967	na
17_603447	17	603447	0.0897057	na
17_603702	17	603702	0.315779	na
17_604452	17	604452	0.3492	na
17_609008	17	609008	0.300852	na
17_613329	17	613329	0.899311	na
17_613392	17	613392	0.506228	na
17_614988	17	614988	0.172175	na
17_616862	17	616862	0.390749	na
17_619155	17	619155	0.397472	na
17_619925	17	619925	0.318065	na
17_620025	17	620025	0.093019	na
17_620028	17	620028	0.192272	na
17_624129	17	624129	0.949202	na
17_624134	17	624134	0.999473	na
17_626071	17	626071	0.511333	na
17_627034	17	627034	0.25655	na
17_627968	17	627968	0.333236	na
17_632756	17	632756	0.374489	na
17_632758	17	632758	0.464983	na
17_633099	17	633099	0.865091	na
17_633176	17	633176	0.31139	na
17_633530	17	633530	0.435185	na
17_633534	17	633534	0.210748	na
17_633646	17	633646	0.520025	na
17_634355	17	634355	0.624531	na
17_634667	17	634667	0.566345	na
17_634734	17	634734	0.400954	na
17_635398	17	635398	0.947844	na
17_635749	17	635749	0.502905	na
17_639727	17	639727	0.252962	na
17_640843	17	640843	0.670885	na
17_640849	17	640849	0.445022	na
17_640850	17	640850	0.445022	na
17_641956	17	641956	0.264513	na
17_642086	17	642086	0.647785	na
17_642342	17	642342	0.487194	na
17_643801	17	643801	0.669754	na
17_643881	17	643881	0.738512	na
17_643981	17	643981	0.791437	na
17_643989	17	643989	0.492374	na
17_644099	17	644099	0.338746	na
17_645269	17	645269	0.418533	na
17_645558	17	645558	0.852046	na
17_646398	17	646398	0.153448	na
17_646598	17	646598	0.924028	na
17_647313	17	647313	0.16019	na
17_648950	17	648950	0.299686	na
17_649285	17	649285	0.154239	na
17_649378	17	649378	0.359204	na
17_649709	17	649709	0.430623	na
17_650092	17	650092	0.388869	na
17_650190	17	650190	0.397605	na
17_650763	17	650763	0.702341	na
17_651453	17	651453	0.848644	na
17_652113	17	652113	0.0430753	na
17_652129	17	652129	0.723683	na
17_652589	17	652589	0.274811	na
17_654457	17	654457	0.182994	na
17_654519	17	654519	0.408848	na
17_654542	17	654542	0.988382	na
17_656312	17	656312	0.358523	na
17_656393	17	656393	0.787316	na
17_656562	17	656562	0.385952	na
17_666652	17	666652	0.387948	na
17_666705	17	666705	0.258969	na
17_667982	17	667982	0.0481364	na
17_668050	17	668050	0.0308957	na
17_668588	17	668588	0.262036	na
17_669647	17	669647	0.903248	na
17_671661	17	671661	0.183658	na
17_677933	17	677933	0.2732	na
17_677949	17	677949	0.5371	na
17_678343	17	678343	0.248448	na
17_679518	17	679518	0.315241	na
17_680336	17	680336	0.535537	na
17_680368	17	680368	0.0460764	na
17_685772	17	685772	0.476644	na
17_686166	17	686166	0.384854	na
17_687390	17	687390	0.576748	na
17_687636	17	687636	0.00187884	na
17_688528	17	688528	0.234964	na
17_688789	17	688789	0.128005	na
17_690881	17	690881	0.599254	na
17_691105	17	691105	0.531439	na
17_692184	17	692184	0.113499	na
17_694025	17	694025	0.542715	na
17_696458	17	696458	0.114433	na
17_696652	17	696652	0.53966	na
17_696681	17	696681	0.58309	na
17_698056	17	698056	0.722965	na
17_702140	17	702140	0.139841	na
17_703248	17	703248	0.935109	na
17_703249	17	703249	0.670791	na
17_714086	17	714086	0.293695	na
17_714089	17	714089	0.238692	na
17_714099	17	714099	0.415051	na
17_714998	17	714998	0.140884	na
17_715535	17	715535	0.435578	na
17_715594	17	715594	0.686273	na
17_717500	17	717500	0.507331	na
17_717517	17	717517	0.0340387	na
17_717519	17	717519	0.0340387	na
17_717774	17	717774	0.549952	na
17_718004	17	718004	0.366781	na
17_718084	17	718084	0.20259	na
17_718126	17	718126	0.208178	na
17_718198	17	718198	0.750929	na
17_718301	17	718301	0.545473	na
17_718406	17	718406	0.401986	na
17_718757	17	718757	0.820814	na
17_719303	17	719303	0.485148	na
17_720693	17	720693	0.401948	na
17_721622	17	721622	0.139434	na
17_733855	17	733855	0.312854	na
17_735228	17	735228	0.290629	na
17_737075	17	737075	0.0277213	na
17_743424	17	743424	0.638753	na
17_743475	17	743475	0.218491	na
17_743536	17	743536	0.21543	na
17_753361	17	753361	0.229299	na
17_753483	17	753483	0.291704	na
17_757843	17	757843	0.091452	na
17_768839	17	768839	0.287737	na
17_769628	17	769628	0.511035	na
17_770220	17	770220	0.109659	na
17_771906	17	771906	0.429531	na
17_771999	17	771999	0.655451	na
17_772850	17	772850	0.199189	na
17_774348	17	774348	0.397235	na
17_774402	17	774402	0.347235	na
17_775364	17	775364	0.0652088	na
17_775500	17	775500	0.72549	na
17_775572	17	775572	0.587135	na
17_775828	17	775828	0.689788	na
17_775833	17	775833	0.668799	na
17_777415	17	777415	0.623524	na
17_777497	17	777497	0.579696	na
17_777505	17	777505	0.243787	na
17_777955	17	777955	0.674072	na
17_778343	17	778343	0.22563	na
17_778466	17	778466	0.262269	na
17_778467	17	778467	0.427768	na
17_778693	17	778693	0.233576	na
17_778855	17	778855	0.305269	na
17_779082	17	779082	0.139545	na
17_780542	17	780542	0.582966	na
17_780563	17	780563	0.584646	na
17_780656	17	780656	0.225138	na
17_780804	17	780804	0.721718	na
17_781012	17	781012	0.724171	na
17_781636	17	781636	0.654882	na
17_781994	17	781994	0.374337	na
17_782168	17	782168	0.639799	na
17_782170	17	782170	0.577042	na
17_782179	17	782179	0.698222	na
17_785813	17	785813	0.992781	na
17_785852	17	785852	0.880301	na
17_785853	17	785853	0.88119	na
17_785867	17	785867	0.729033	na
17_786517	17	786517	0.737822	na
17_786565	17	786565	0.562945	na
17_786783	17	786783	0.229104	na
17_788431	17	788431	0.284463	na
17_789053	17	789053	0.722127	na
17_789102	17	789102	0.518978	na
17_789855	17	789855	0.305178	na
17_790188	17	790188	0.248539	na
17_790450	17	790450	0.409706	na
17_790546	17	790546	0.0623577	na
17_790598	17	790598	0.0474909	na
17_790820	17	790820	0.923924	na
17_790821	17	790821	0.942248	na
17_791614	17	791614	0.0999899	na
17_791643	17	791643	0.0587104	na
17_791952	17	791952	0.174252	na
17_792186	17	792186	0.389147	na
17_792188	17	792188	0.117527	na
17_792239	17	792239	0.16609	na
17_799597	17	799597	0.88452	na
17_799618	17	799618	0.494573	na
17_799749	17	799749	0.908525	na
17_799946	17	799946	0.189433	na
17_800890	17	800890	0.0548634	na
17_801462	17	801462	0.0504847	na
17_801594	17	801594	0.0257878	na
17_801642	17	801642	0.153446	na
17_802462	17	802462	0.525307	na
17_802474	17	802474	0.970298	na
17_802645	17	802645	0.879684	na
17_802685	17	802685	0.457715	na
17_803146	17	803146	0.664278	na
17_803165	17	803165	0.847568	na
17_803166	17	803166	0.925717	na
17_803289	17	803289	0.116001	na
17_803331	17	803331	0.448053	na
17_803444	17	803444	0.892945	na
17_804577	17	804577	0.217682	na
17_804695	17	804695	0.0851906	na
17_806137	17	806137	0.110585	na
17_807640	17	807640	0.850745	na
17_808009	17	808009	0.355571	na
17_810380	17	810380	0.365006	na
17_810486	17	810486	0.15822	na
17_810709	17	810709	0.37827	na
17_811089	17	811089	0.149143	na
17_811249	17	811249	0.209351	na
17_811521	17	811521	0.416083	na
17_811853	17	811853	0.727452	na
17_812201	17	812201	0.483767	na
17_812221	17	812221	0.887983	na
17_812464	17	812464	0.548453	na
17_814730	17	814730	0.233061	na
17_814964	17	814964	0.168375	na
17_815339	17	815339	0.224275	na
17_815638	17	815638	0.740621	na
17_815918	17	815918	0.999666	na
17_816028	17	816028	0.931309	na
17_816043	17	816043	0.951635	na
17_816245	17	816245	0.665581	na
17_816475	17	816475	0.687071	na
17_817037	17	817037	0.709663	na
17_818065	17	818065	0.240467	na
17_818112	17	818112	0.828539	na
17_818402	17	818402	0.784633	na
17_818709	17	818709	0.670726	na
17_819478	17	819478	0.250036	na
17_819924	17	819924	0.464224	na
17_821442	17	821442	0.54979	na
17_821939	17	821939	0.420423	na
17_822893	17	822893	0.46987	na
17_824056	17	824056	0.159469	na
17_824497	17	824497	0.206721	na
17_825004	17	825004	0.790427	na
17_825117	17	825117	0.785385	na
17_826326	17	826326	0.175409	na
17_826438	17	826438	0.602433	na
17_826766	17	826766	0.486337	na
17_826802	17	826802	0.719067	na
17_826919	17	826919	0.684653	na
17_827329	17	827329	0.416362	na
17_827417	17	827417	0.333882	na
17_827473	17	827473	0.835052	na
17_827634	17	827634	0.325774	na
17_827678	17	827678	0.76445	na
17_827679	17	827679	0.764209	na
17_827713	17	827713	0.26601	na
17_827728	17	827728	0.0837588	na
17_828048	17	828048	0.462829	na
17_828182	17	828182	0.625579	na
17_828199	17	828199	0.280239	na
17_828315	17	828315	0.597095	na
17_828551	17	828551	0.820114	na
17_828562	17	828562	0.603044	na
17_829086	17	829086	0.421649	na
17_830004	17	830004	0.643892	na
17_830254	17	830254	0.17854	na
17_830893	17	830893	0.103757	na
17_830917	17	830917	0.721267	na
17_831926	17	831926	0.786207	na
17_832678	17	832678	0.496767	na
17_832980	17	832980	0.782361	na
17_833212	17	833212	0.650839	na
17_833352	17	833352	0.875322	na
17_833368	17	833368	0.734712	na
17_833384	17	833384	0.30083	na
17_833950	17	833950	0.819837	na
17_834285	17	834285	0.518463	na
17_835112	17	835112	0.490781	na
17_835114	17	835114	0.588744	na
17_835266	17	835266	0.805192	na
17_835782	17	835782	0.547414	na
17_835783	17	835783	0.588535	na
17_836726	17	836726	0.479021	na
17_836829	17	836829	0.697767	na
17_837189	17	837189	0.762323	na
17_837639	17	837639	0.943312	na
17_838901	17	838901	0.00154839	na
17_839291	17	839291	0.376775	na
17_839587	17	839587	0.998114	na
17_839793	17	839793	0.359094	na
17_839967	17	839967	0.55243	na
17_840298	17	840298	0.961474	na
17_841741	17	841741	0.36578	na
17_842259	17	842259	0.270925	na
17_842308	17	842308	0.540584	na
17_842581	17	842581	0.337282	na
17_843394	17	843394	0.705855	na
17_844757	17	844757	0.635635	na
17_845975	17	845975	0.522655	na
17_846105	17	846105	0.308293	na
17_847574	17	847574	0.533812	na
17_847575	17	847575	0.809156	na
17_848150	17	848150	0.671289	na
17_848187	17	848187	0.997485	na
17_849202	17	849202	0.791318	na
17_849436	17	849436	0.197432	na
17_849735	17	849735	0.621402	na
17_850778	17	850778	0.508682	na
17_850786	17	850786	0.493256	na
17_850788	17	850788	0.487742	na
17_850813	17	850813	0.43315	na
17_850827	17	850827	0.304196	na
17_850865	17	850865	0.234109	na
17_853643	17	853643	0.382892	na
17_854365	17	854365	0.515732	na
17_855003	17	855003	0.815223	na
17_855668	17	855668	0.39209	na
17_855723	17	855723	0.788418	na
17_856246	17	856246	0.843657	na
17_856381	17	856381	0.101632	na
17_856552	17	856552	0.394002	na
17_856599	17	856599	0.00808493	na
17_856606	17	856606	0.0273327	na
17_857509	17	857509	0.238249	na
17_857600	17	857600	0.81484	na
17_858321	17	858321	0.666451	na
17_858450	17	858450	0.414649	na
17_858874	17	858874	0.840774	na
17_859281	17	859281	0.965123	na
17_859293	17	859293	0.761859	na
17_860502	17	860502	0.650889	na
17_861993	17	861993	0.453413	na
17_863480	17	863480	0.851149	na
17_863502	17	863502	0.549237	na
17_864615	17	864615	0.349373	na
17_864617	17	864617	0.337716	na
17_864621	17	864621	0.228481	na
17_864768	17	864768	0.0814954	na
17_866488	17	866488	0.0236517	na
17_866503	17	866503	0.339212	na
17_866933	17	866933	0.890971	na
17_867364	17	867364	0.972736	na
17_867583	17	867583	0.0561824	na
17_868042	17	868042	0.497095	na
17_871422	17	871422	0.693446	na
17_872878	17	872878	0.610426	na
17_876346	17	876346	0.253472	na
17_878851	17	878851	0.840233	na
17_878894	17	878894	0.570533	na
17_882990	17	882990	0.505784	na
17_895751	17	895751	0.672918	na
17_898133	17	898133	0.549012	na
17_898801	17	898801	0.759465	na
17_901038	17	901038	0.915796	na
17_901064	17	901064	0.104911	na
17_910339	17	910339	0.549552	na
17_915312	17	915312	0.153138	na
17_916883	17	916883	0.188116	na
17_917012	17	917012	0.313445	na
17_918513	17	918513	0.465051	na
17_918716	17	918716	0.539197	na
17_921279	17	921279	0.0874518	na
17_922771	17	922771	0.496877	na
17_922775	17	922775	0.898219	na
17_923020	17	923020	0.544772	na
17_923752	17	923752	0.788645	na
17_924173	17	924173	0.141717	na
17_929468	17	929468	0.31837	na
17_929504	17	929504	0.916702	na
17_930937	17	930937	0.925208	na
17_931220	17	931220	0.81637	na
17_932210	17	932210	0.146161	na
17_932608	17	932608	0.819483	na
17_933298	17	933298	0.986364	na
17_934225	17	934225	0.738125	na
17_934477	17	934477	0.042536	na
17_934967	17	934967	0.491378	na
17_935036	17	935036	0.453183	na
17_935158	17	935158	0.638753	na
17_935705	17	935705	0.33642	na
17_935752	17	935752	0.208372	na
17_935881	17	935881	0.823109	na
17_938387	17	938387	0.576594	na
17_938398	17	938398	0.154633	na
17_938526	17	938526	0.359425	na
17_940488	17	940488	0.408303	na
17_943649	17	943649	0.496339	na
17_943859	17	943859	0.324816	na
17_944683	17	944683	0.881576	na
17_945279	17	945279	0.642686	na
17_945331	17	945331	0.526096	na
17_945441	17	945441	0.161152	na
17_945848	17	945848	0.53903	na
17_946523	17	946523	0.809327	na
17_948632	17	948632	0.307997	na
17_948787	17	948787	0.447873	na
17_949562	17	949562	0.291334	na
17_949576	17	949576	0.824385	na
17_949626	17	949626	0.423081	na
17_951749	17	951749	0.432791	na
17_953655	17	953655	0.315203	na
17_953660	17	953660	0.409832	na
17_953771	17	953771	0.752771	na
17_953773	17	953773	0.492501	na
17_953776	17	953776	0.678187	na
17_953825	17	953825	0.582568	na
17_953847	17	953847	0.6246	na
17_953968	17	953968	0.00767749	na
17_954008	17	954008	0.99302	na
17_954029	17	954029	0.699093	na
17_954064	17	954064	0.305365	na
17_954099	17	954099	0.0260397	na
17_954141	17	954141	0.337343	na
17_954162	17	954162	0.322691	na
17_955206	17	955206	0.352396	na
17_955213	17	955213	0.369526	na
17_955251	17	955251	0.458654	na
17_955270	17	955270	0.247939	na
17_955271	17	955271	0.249725	na
17_956737	17	956737	0.879791	na
17_956762	17	956762	0.341331	na
17_960915	17	960915	0.0916849	na
17_961722	17	961722	0.742347	na
17_961731	17	961731	0.682923	na
17_962136	17	962136	0.085241	na
17_962322	17	962322	0.327123	na
17_962468	17	962468	0.360799	na
17_962864	17	962864	0.321922	na
17_962988	17	962988	0.922652	na
17_964222	17	964222	0.880111	na
17_965962	17	965962	0.639524	na
17_966401	17	966401	0.315988	na
17_968685	17	968685	0.110604	na
17_968949	17	968949	0.44815	na
17_971515	17	971515	0.85797	na
17_971693	17	971693	0.850166	na
17_971819	17	971819	0.624796	na
17_971938	17	971938	0.902939	na
17_982438	17	982438	0.446273	na
17_982472	17	982472	0.855666	na
17_983696	17	983696	0.861523	na
17_985245	17	985245	0.41321	na
17_985614	17	985614	0.539222	na
17_987284	17	987284	0.180708	na
17_988106	17	988106	0.737562	na
17_988334	17	988334	0.572285	na
17_988628	17	988628	0.837548	na
17_990410	17	990410	0.693681	na
17_994215	17	994215	0.801704	na
17_994441	17	994441	0.39259	na
17_994515	17	994515	0.89001	na
17_994522	17	994522	0.29157	na
17_994537	17	994537	0.350021	na
17_994546	17	994546	0.475564	na
17_994772	17	994772	0.32388	na
17_995248	17	995248	0.572113	na
17_995299	17	995299	0.346514	na
17_995514	17	995514	0.949911	na
17_999024	17	999024	0.0753194	na
17_999850	17	999850	0.302415	na
17_1000204	17	1000204	0.246751	na
17_1000600	17	1000600	0.16789	na
17_1001912	17	1001912	0.6363	na
17_1001994	17	1001994	0.441089	na
17_1002033	17	1002033	0.14377	na
17_1002036	17	1002036	0.889548	na
17_1002081	17	1002081	0.845499	na
17_1003480	17	1003480	0.0749717	na
17_1004648	17	1004648	0.130353	na
17_1005216	17	1005216	0.647867	na
17_1009698	17	1009698	0.495295	na
17_1011238	17	1011238	0.626002	na
17_1012061	17	1012061	0.0358188	na
17_1013013	17	1013013	0.288078	na
17_1013832	17	1013832	0.636386	na
17_1013938	17	1013938	0.706918	na
17_1014502	17	1014502	0.200446	na
17_1014544	17	1014544	0.780021	na
17_1014729	17	1014729	0.624868	na
17_1016148	17	1016148	0.570237	na
17_1017692	17	1017692	0.638985	na
17_1017700	17	1017700	0.705322	na
17_1017737	17	1017737	0.798906	na
17_1018411	17	1018411	0.483487	na
17_1019177	17	1019177	0.44416	na
17_1019916	17	1019916	0.521822	na
17_1020853	17	1020853	0.842731	na
17_1021213	17	1021213	0.506935	na
17_1021681	17	1021681	0.0971465	na
17_1021964	17	1021964	0.958612	na
17_1022129	17	1022129	0.42927	na
17_1022375	17	1022375	0.924562	na
17_1022716	17	1022716	0.903075	na
17_1022767	17	1022767	0.878491	na
17_1022919	17	1022919	0.743806	na
17_1023407	17	1023407	0.190138	na
17_1023452	17	1023452	0.324886	na
17_1023519	17	1023519	0.282067	na
17_1023610	17	1023610	0.890027	na
17_1024073	17	1024073	0.515353	na
17_1024103	17	1024103	0.850842	na
17_1024176	17	1024176	0.750779	na
17_1024424	17	1024424	0.366425	na
17_1024786	17	1024786	0.66397	na
17_1024873	17	1024873	0.805308	na
17_1024874	17	1024874	0.825065	na
17_1025311	17	1025311	0.554245	na
17_1026639	17	1026639	0.355063	na
17_1027398	17	1027398	0.807564	na
17_1027432	17	1027432	0.687624	na
17_1027476	17	1027476	0.985343	na
17_1027624	17	1027624	0.283152	na
17_1027650	17	1027650	0.379881	na
17_1027654	17	1027654	0.246994	na
17_1035320	17	1035320	0.738471	na
17_1035463	17	1035463	0.838637	na
17_1037270	17	1037270	0.788962	na
17_1037409	17	1037409	0.594677	na
17_1037877	17	1037877	0.181871	na
17_1038453	17	1038453	0.110496	na
17_1040317	17	1040317	0.256116	na
17_1041359	17	1041359	0.79636	na
17_1041364	17	1041364	0.816627	na
17_1041678	17	1041678	0.932516	na
17_1041704	17	1041704	0.958717	na
17_1042494	17	1042494	0.899061	na
17_1042962	17	1042962	0.94005	na
17_1043774	17	1043774	0.544087	na
17_1043868	17	1043868	0.86641	na
17_1043940	17	1043940	0.62423	na
17_1043979	17	1043979	0.990539	na
17_1044126	17	1044126	0.492496	na
17_1044604	17	1044604	0.723283	na
17_1044635	17	1044635	0.850148	na
17_1044999	17	1044999	0.175491	na
17_1045608	17	1045608	0.980004	na
17_1045966	17	1045966	0.753361	na
17_1046949	17	1046949	0.350446	na
17_1047495	17	1047495	0.596838	na
17_1050689	17	1050689	0.88714	na
17_1050933	17	1050933	0.609728	na
17_1050974	17	1050974	0.412019	na
17_1050983	17	1050983	0.693897	na
17_1051016	17	1051016	0.31683	na
17_1051029	17	1051029	0.914844	na
17_1051037	17	1051037	0.884299	na
17_1051052	17	1051052	0.723562	na
17_1051095	17	1051095	0.421167	na
17_1051166	17	1051166	0.351673	na
17_1051172	17	1051172	0.335193	na
17_1051179	17	1051179	0.229152	na
17_1051180	17	1051180	0.229152	na
17_1051187	17	1051187	0.159341	na
17_1051214	17	1051214	0.17275	na
17_1051217	17	1051217	0.17275	na
17_1051224	17	1051224	0.177542	na
17_1051229	17	1051229	0.177542	na
17_1051232	17	1051232	0.177542	na
17_1051236	17	1051236	0.0861688	na
17_1051239	17	1051239	0.0574618	na
17_1051240	17	1051240	0.0574618	na
17_1051246	17	1051246	0.315415	na
17_1051265	17	1051265	0.516965	na
17_1051272	17	1051272	0.214141	na
17_1051276	17	1051276	0.169335	na
17_1051277	17	1051277	0.169335	na
17_1051292	17	1051292	0.228017	na
17_1051301	17	1051301	0.616128	na
17_1051312	17	1051312	0.157592	na
17_1051331	17	1051331	0.560664	na
17_1051348	17	1051348	0.819783	na
17_1051358	17	1051358	0.419097	na
17_1051370	17	1051370	0.70338	na
17_1051392	17	1051392	0.915254	na
17_1051418	17	1051418	0.518609	na
17_1051421	17	1051421	0.679725	na
17_1051422	17	1051422	0.679725	na
17_1051430	17	1051430	0.902058	na
17_1051436	17	1051436	0.455031	na
17_1051445	17	1051445	0.769768	na
17_1051448	17	1051448	0.578077	na
17_1051460	17	1051460	0.712532	na
17_1051484	17	1051484	0.888713	na
17_1051500	17	1051500	0.792895	na
17_1051505	17	1051505	0.772036	na
17_1051508	17	1051508	0.772036	na
17_1051510	17	1051510	0.756875	na
17_1051511	17	1051511	0.854709	na
17_1051512	17	1051512	0.854709	na
17_1051522	17	1051522	0.929656	na
17_1051523	17	1051523	0.839268	na
17_1051527	17	1051527	0.771789	na
17_1051528	17	1051528	0.583289	na
17_1051533	17	1051533	0.89673	na
17_1051544	17	1051544	0.397395	na
17_1051545	17	1051545	0.375132	na
17_1051546	17	1051546	0.375132	na
17_1051553	17	1051553	0.264266	na
17_1051557	17	1051557	0.264266	na
17_1051562	17	1051562	0.132849	na
17_1051564	17	1051564	0.1739	na
17_1051565	17	1051565	0.1739	na
17_1051585	17	1051585	0.893273	na
17_1051586	17	1051586	0.880114	na
17_1051601	17	1051601	0.482185	na
17_1051632	17	1051632	0.496803	na
17_1051639	17	1051639	0.547324	na
17_1051646	17	1051646	0.723498	na
17_1051657	17	1051657	0.902824	na
17_1051682	17	1051682	0.587406	na
17_1051687	17	1051687	0.526983	na
17_1051694	17	1051694	0.682349	na
17_1051706	17	1051706	0.917264	na
17_1051712	17	1051712	0.330685	na
17_1051715	17	1051715	0.678722	na
17_1051732	17	1051732	0.953977	na
17_1051736	17	1051736	0.561227	na
17_1051741	17	1051741	0.566715	na
17_1051743	17	1051743	0.627732	na
17_1051744	17	1051744	0.679831	na
17_1051748	17	1051748	0.332231	na
17_1051752	17	1051752	0.271167	na
17_1051753	17	1051753	0.271167	na
17_1051765	17	1051765	0.449485	na
17_1051766	17	1051766	0.538483	na
17_1051769	17	1051769	0.433063	na
17_1051820	17	1051820	0.0551575	na
17_1051838	17	1051838	0.00746323	na
17_1052123	17	1052123	0.136857	na
17_1052125	17	1052125	0.14105	na
17_1052165	17	1052165	0.737862	na
17_1052200	17	1052200	0.635139	na
17_1052204	17	1052204	0.385581	na
17_1052206	17	1052206	0.207259	na
17_1052209	17	1052209	0.180087	na
17_1052234	17	1052234	0.305781	na
17_1052239	17	1052239	0.355677	na
17_1052294	17	1052294	0.149676	na
17_1052314	17	1052314	0.111982	na
17_1052353	17	1052353	0.33376	na
17_1052366	17	1052366	0.53959	na
17_1052401	17	1052401	0.504109	na
17_1052421	17	1052421	0.906007	na
17_1052440	17	1052440	0.785373	na
17_1052465	17	1052465	0.300883	na
17_1052485	17	1052485	0.408182	na
17_1052487	17	1052487	0.478481	na
17_1052491	17	1052491	0.219572	na
17_1052531	17	1052531	0.440165	na
17_1052571	17	1052571	0.538534	na
17_1052575	17	1052575	0.882838	na
17_1052586	17	1052586	0.917602	na
17_1052597	17	1052597	0.669949	na
17_1052642	17	1052642	0.627908	na
17_1052652	17	1052652	0.954657	na
17_1052662	17	1052662	0.563844	na
17_1052664	17	1052664	0.776647	na
17_1052684	17	1052684	0.331445	na
17_1052752	17	1052752	0.572161	na
17_1052779	17	1052779	0.465643	na
17_1052780	17	1052780	0.465643	na
17_1052783	17	1052783	0.620648	na
17_1052836	17	1052836	0.606765	na
17_1052837	17	1052837	0.648209	na
17_1052852	17	1052852	0.389931	na
17_1052857	17	1052857	0.380293	na
17_1052880	17	1052880	0.777151	na
17_1053088	17	1053088	0.955595	na
17_1053107	17	1053107	0.734262	na
17_1053117	17	1053117	0.937547	na
17_1053122	17	1053122	0.126856	na
17_1053124	17	1053124	0.116957	na
17_1053136	17	1053136	0.223202	na
17_1053202	17	1053202	0.125535	na
17_1053242	17	1053242	0.07363	na
17_1053257	17	1053257	0.116007	na
17_1053494	17	1053494	0.289676	na
17_1053511	17	1053511	0.670596	na
17_1053512	17	1053512	0.686814	na
17_1053529	17	1053529	0.499489	na
17_1053545	17	1053545	0.705812	na
17_1053548	17	1053548	0.645837	na
17_1053551	17	1053551	0.667163	na
17_1053590	17	1053590	0.499911	na
17_1053595	17	1053595	0.186922	na
17_1053640	17	1053640	0.462702	na
17_1053643	17	1053643	0.401654	na
17_1053662	17	1053662	0.399038	na
17_1054072	17	1054072	0.653498	na
17_1054213	17	1054213	0.231411	na
17_1054216	17	1054216	0.233508	na
17_1054217	17	1054217	0.24983	na
17_1054263	17	1054263	0.875055	na
17_1054267	17	1054267	0.606082	na
17_1054281	17	1054281	0.432706	na
17_1054286	17	1054286	0.402123	na
17_1054290	17	1054290	0.333985	na
17_1054342	17	1054342	0.480266	na
17_1054346	17	1054346	0.405671	na
17_1054356	17	1054356	0.56458	na
17_1054640	17	1054640	0.579282	na
17_1054773	17	1054773	0.98679	na
17_1054868	17	1054868	0.097188	na
17_1054881	17	1054881	0.189942	na
17_1054883	17	1054883	0.146829	na
17_1054895	17	1054895	0.0793021	na
17_1054920	17	1054920	0.562452	na
17_1054921	17	1054921	0.593443	na
17_1055065	17	1055065	0.881712	na
17_1055075	17	1055075	0.603399	na
17_1055079	17	1055079	0.477864	na
17_1055093	17	1055093	0.759563	na
17_1055292	17	1055292	0.54129	na
17_1055341	17	1055341	0.665086	na
17_1055370	17	1055370	0.115318	na
17_1055693	17	1055693	0.73263	na
17_1055698	17	1055698	0.783743	na
17_1055705	17	1055705	0.604862	na
17_1055707	17	1055707	0.569568	na
17_1055725	17	1055725	0.697753	na
17_1055734	17	1055734	0.63406	na
17_1055736	17	1055736	0.788735	na
17_1055794	17	1055794	0.851892	na
17_1055817	17	1055817	0.701936	na
17_1056052	17	1056052	0.81964	na
17_1056060	17	1056060	0.37841	na
17_1056064	17	1056064	0.685863	na
17_1056076	17	1056076	0.628069	na
17_1056098	17	1056098	0.709391	na
17_1056131	17	1056131	0.318957	na
17_1056155	17	1056155	0.257657	na
17_1056161	17	1056161	0.360776	na
17_1056166	17	1056166	0.450081	na
17_1056181	17	1056181	0.305999	na
17_1056232	17	1056232	0.328712	na
17_1056235	17	1056235	0.221775	na
17_1056265	17	1056265	0.195118	na
17_1056269	17	1056269	0.292607	na
17_1056298	17	1056298	0.776966	na
17_1056313	17	1056313	0.826671	na
17_1056322	17	1056322	0.719635	na
17_1056328	17	1056328	0.873048	na
17_1056330	17	1056330	0.873048	na
17_1056389	17	1056389	0.43176	na
17_1056392	17	1056392	0.256979	na
17_1056393	17	1056393	0.24969	na
17_1056396	17	1056396	0.29357	na
17_1056467	17	1056467	0.237663	na
17_1056478	17	1056478	0.60403	na
17_1056484	17	1056484	0.540783	na
17_1056487	17	1056487	0.480014	na
17_1056488	17	1056488	0.480014	na
17_1056489	17	1056489	0.480014	na
17_1056559	17	1056559	0.532609	na
17_1056569	17	1056569	0.155132	na
17_1056570	17	1056570	0.155132	na
17_1056573	17	1056573	0.243359	na
17_1056589	17	1056589	0.700192	na
17_1056652	17	1056652	0.563704	na
17_1056664	17	1056664	0.960434	na
17_1056679	17	1056679	0.589695	na
17_1056693	17	1056693	0.592977	na
17_1056699	17	1056699	0.462408	na
17_1056704	17	1056704	0.472994	na
17_1056705	17	1056705	0.530153	na
17_1056718	17	1056718	0.774091	na
17_1056727	17	1056727	0.901464	na
17_1056733	17	1056733	0.998526	na
17_1056747	17	1056747	0.927149	na
17_1056772	17	1056772	0.538071	na
17_1056775	17	1056775	0.497617	na
17_1056780	17	1056780	0.349465	na
17_1056809	17	1056809	0.713635	na
17_1056820	17	1056820	0.951921	na
17_1056836	17	1056836	0.730866	na
17_1056841	17	1056841	0.697855	na
17_1056843	17	1056843	0.91123	na
17_1056851	17	1056851	0.599685	na
17_1056870	17	1056870	0.281486	na
17_1056919	17	1056919	0.584671	na
17_1056920	17	1056920	0.584671	na
17_1056937	17	1056937	0.879379	na
17_1056943	17	1056943	0.67851	na
17_1056985	17	1056985	0.465215	na
17_1057005	17	1057005	0.996266	na
17_1057026	17	1057026	0.741235	na
17_1057028	17	1057028	0.741235	na
17_1057044	17	1057044	0.925137	na
17_1057075	17	1057075	0.215016	na
17_1057096	17	1057096	0.427984	na
17_1057113	17	1057113	0.597526	na
17_1057138	17	1057138	0.365283	na
17_1057192	17	1057192	0.0541513	na
17_1057195	17	1057195	0.0538844	na
17_1057231	17	1057231	0.0124235	na
17_1057244	17	1057244	0.0429896	na
17_1057246	17	1057246	0.0429896	na
17_1057249	17	1057249	0.0429896	na
17_1057278	17	1057278	0.0763889	na
17_1057282	17	1057282	0.116415	na
17_1057288	17	1057288	0.115781	na
17_1057292	17	1057292	0.115781	na
17_1057300	17	1057300	0.0607646	na
17_1057303	17	1057303	0.0491216	na
17_1057321	17	1057321	0.0355186	na
17_1057333	17	1057333	0.0163746	na
17_1057389	17	1057389	0.495972	na
17_1057397	17	1057397	0.604451	na
17_1057403	17	1057403	0.75555	na
17_1057404	17	1057404	0.984563	na
17_1057408	17	1057408	0.717477	na
17_1057462	17	1057462	0.34886	na
17_1057504	17	1057504	0.0242527	na
17_1057521	17	1057521	0.167551	na
17_1057522	17	1057522	0.129902	na
17_1057570	17	1057570	0.182375	na
17_1057571	17	1057571	0.182375	na
17_1057600	17	1057600	0.0945313	na
17_1057605	17	1057605	0.140994	na
17_1057624	17	1057624	0.0293114	na
17_1057660	17	1057660	0.585864	na
17_1057773	17	1057773	0.8189	na
17_1057775	17	1057775	0.652023	na
17_1057823	17	1057823	0.567668	na
17_1057832	17	1057832	0.387712	na
17_1057847	17	1057847	0.657221	na
17_1057857	17	1057857	0.418018	na
17_1057859	17	1057859	0.322721	na
17_1057863	17	1057863	0.291223	na
17_1057868	17	1057868	0.378227	na
17_1057884	17	1057884	0.294418	na
17_1057886	17	1057886	0.294418	na
17_1057926	17	1057926	0.630114	na
17_1057971	17	1057971	0.0938864	na
17_1057974	17	1057974	0.125432	na
17_1058001	17	1058001	0.786719	na
17_1058004	17	1058004	0.786719	na
17_1058010	17	1058010	0.914348	na
17_1058037	17	1058037	0.907625	na
17_1058064	17	1058064	0.667258	na
17_1058068	17	1058068	0.667258	na
17_1058070	17	1058070	0.667258	na
17_1058100	17	1058100	0.575974	na
17_1058123	17	1058123	0.652244	na
17_1058153	17	1058153	0.327288	na
17_1058178	17	1058178	0.979905	na
17_1058208	17	1058208	0.749095	na
17_1058226	17	1058226	0.575329	na
17_1058265	17	1058265	0.29621	na
17_1058266	17	1058266	0.29621	na
17_1058279	17	1058279	0.333019	na
17_1058301	17	1058301	0.39807	na
17_1058313	17	1058313	0.610896	na
17_1058346	17	1058346	0.07673	na
17_1058357	17	1058357	0.129612	na
17_1058369	17	1058369	0.308556	na
17_1058370	17	1058370	0.308556	na
17_1058372	17	1058372	0.455297	na
17_1058400	17	1058400	0.179921	na
17_1058421	17	1058421	0.354593	na
17_1058520	17	1058520	0.339834	na
17_1058527	17	1058527	0.39199	na
17_1058535	17	1058535	0.866347	na
17_1058544	17	1058544	0.131626	na
17_1059342	17	1059342	0.827601	na
17_1060825	17	1060825	0.96784	na
17_1060962	17	1060962	0.620664	na
17_1061810	17	1061810	0.949852	na
17_1062290	17	1062290	0.203899	na
17_1062411	17	1062411	0.482969	na
17_1062665	17	1062665	0.811339	na
17_1063657	17	1063657	0.77837	na
17_1064986	17	1064986	0.493696	na
17_1076508	17	1076508	0.922319	na
17_1076747	17	1076747	0.72832	na
17_1076813	17	1076813	0.705853	na
17_1076814	17	1076814	0.705853	na
17_1077311	17	1077311	0.0377739	na
17_1077371	17	1077371	0.417353	na
17_1077382	17	1077382	0.469382	na
17_1077385	17	1077385	0.708018	na
17_1077389	17	1077389	0.829642	na
17_1077414	17	1077414	0.217348	na
17_1077423	17	1077423	0.204646	na
17_1077431	17	1077431	0.214039	na
17_1077444	17	1077444	0.117301	na
17_1077448	17	1077448	0.138226	na
17_1077460	17	1077460	0.0372965	na
17_1077476	17	1077476	0.077302	na
17_1077485	17	1077485	0.176223	na
17_1077499	17	1077499	0.212999	na
17_1077503	17	1077503	0.224131	na
17_1077504	17	1077504	0.224131	na
17_1077508	17	1077508	0.197621	na
17_1078052	17	1078052	0.299976	na
17_1079206	17	1079206	0.605172	na
17_1079434	17	1079434	0.17607	na
17_1082114	17	1082114	0.217736	na
17_1082569	17	1082569	0.293018	na
17_1082624	17	1082624	0.835893	na
17_1082819	17	1082819	0.425927	na
17_1083087	17	1083087	0.55869	na
17_1083088	17	1083088	0.59493	na
17_1083092	17	1083092	0.595682	na
17_1083095	17	1083095	0.521928	na
17_1083099	17	1083099	0.561239	na
17_1083100	17	1083100	0.568628	na
17_1083110	17	1083110	0.615282	na
17_1083112	17	1083112	0.643648	na
17_1083114	17	1083114	0.643648	na
17_1083120	17	1083120	0.605638	na
17_1084803	17	1084803	0.98727	na
17_1092010	17	1092010	0.832927	na
17_1092262	17	1092262	0.369008	na
17_1092452	17	1092452	0.66267	na
17_1093909	17	1093909	0.770017	na
17_1094110	17	1094110	0.608178	na
17_1097545	17	1097545	0.611972	na
17_1097622	17	1097622	0.0611847	na
17_1097642	17	1097642	0.240636	na
17_1097648	17	1097648	0.213597	na
17_1097656	17	1097656	0.354209	na
17_1097696	17	1097696	0.372082	na
17_1097703	17	1097703	0.357843	na
17_1100106	17	1100106	0.808143	na
17_1102324	17	1102324	0.854408	na
17_1102396	17	1102396	0.312846	na
17_1102426	17	1102426	0.799079	na
17_1102432	17	1102432	0.599076	na
17_1102442	17	1102442	0.758456	na
17_1102600	17	1102600	0.993535	na
17_1102612	17	1102612	0.811599	na
17_1102640	17	1102640	0.564105	na
17_1105509	17	1105509	0.724832	na
17_1105936	17	1105936	0.859127	na
17_1107824	17	1107824	0.935177	na
17_1108166	17	1108166	0.925785	na
17_1109955	17	1109955	0.509666	na
17_1110648	17	1110648	0.593117	na
17_1111404	17	1111404	0.686939	na
17_1114497	17	1114497	0.964731	na
17_1115615	17	1115615	0.744143	na
17_1116354	17	1116354	0.183926	na
17_1116380	17	1116380	0.420513	na
17_1117028	17	1117028	0.344806	na
17_1117772	17	1117772	0.398373	na
17_1117777	17	1117777	0.255634	na
17_1117783	17	1117783	0.208924	na
17_1117784	17	1117784	0.275154	na
17_1117911	17	1117911	0.385607	na
17_1117921	17	1117921	0.360821	na
17_1118083	17	1118083	0.816667	na
17_1120579	17	1120579	0.865718	na
17_1121369	17	1121369	0.031169	na
17_1122089	17	1122089	0.675986	na
17_1122118	17	1122118	0.975804	na
17_1122412	17	1122412	0.490082	na
17_1122463	17	1122463	0.272053	na
17_1123065	17	1123065	0.860025	na
17_1123073	17	1123073	0.983116	na
17_1124104	17	1124104	0.251147	na
17_1124305	17	1124305	0.618108	na
17_1124401	17	1124401	0.131837	na
17_1127992	17	1127992	0.473131	na
17_1128036	17	1128036	0.859187	na
17_1128314	17	1128314	0.86169	na
17_1128870	17	1128870	0.499776	na
17_1129711	17	1129711	0.485562	na
17_1129814	17	1129814	0.385503	na
17_1129821	17	1129821	0.461574	na
17_1130039	17	1130039	0.124411	na
17_1130060	17	1130060	0.759652	na
17_1130077	17	1130077	0.894705	na
17_1130112	17	1130112	0.229956	na
17_1130115	17	1130115	0.186054	na
17_1130128	17	1130128	0.113454	na
17_1130165	17	1130165	0.642366	na
17_1130213	17	1130213	0.486186	na
17_1130215	17	1130215	0.460682	na
17_1130217	17	1130217	0.461283	na
17_1130224	17	1130224	0.405253	na
17_1130319	17	1130319	0.832139	na
17_1130415	17	1130415	0.13948	na
17_1131182	17	1131182	0.130958	na
17_1131218	17	1131218	0.650451	na
17_1131246	17	1131246	0.649569	na
17_1131316	17	1131316	0.76005	na
17_1133999	17	1133999	0.382103	na
17_1135080	17	1135080	0.590822	na
17_1136707	17	1136707	0.681808	na
17_1136726	17	1136726	0.658728	na
17_1137469	17	1137469	0.913974	na
17_1137803	17	1137803	0.690783	na
17_1137815	17	1137815	0.0959612	na
17_1139115	17	1139115	0.167647	na
17_1139911	17	1139911	0.720969	na
17_1140084	17	1140084	0.650298	na
17_1140407	17	1140407	0.909656	na
17_1140481	17	1140481	0.61686	na
17_1141442	17	1141442	0.917113	na
17_1141452	17	1141452	0.279241	na
17_1141553	17	1141553	0.878128	na
17_1141944	17	1141944	0.912502	na
17_1143412	17	1143412	0.335748	na
17_1143846	17	1143846	0.947032	na
17_1144289	17	1144289	0.931384	na
17_1144345	17	1144345	0.467643	na
17_1147104	17	1147104	0.708074	na
17_1148899	17	1148899	0.640124	na
17_1149018	17	1149018	0.846133	na
17_1149107	17	1149107	0.902396	na
17_1150659	17	1150659	0.757276	na
17_1155982	17	1155982	0.517885	na
17_1155991	17	1155991	0.225247	na
17_1156971	17	1156971	0.817903	na
17_1157899	17	1157899	0.267704	na
17_1159300	17	1159300	0.693857	na
17_1159694	17	1159694	0.394697	na
17_1159884	17	1159884	0.923683	na
17_1161930	17	1161930	0.378375	na
17_1163995	17	1163995	0.957101	na
17_1164355	17	1164355	0.893008	na
17_1164527	17	1164527	0.962862	na
17_1164692	17	1164692	0.857081	na
17_1165035	17	1165035	0.892476	na
17_1165862	17	1165862	0.388664	na
17_1167446	17	1167446	0.461044	na
17_1167461	17	1167461	0.0449015	na
17_1169005	17	1169005	0.19007	na
17_1169870	17	1169870	0.256412	na
17_1169878	17	1169878	0.256412	na
17_1173911	17	1173911	0.85345	na
17_1174676	17	1174676	0.758557	na
17_1175698	17	1175698	0.775271	na
17_1175713	17	1175713	0.543084	na
17_1176016	17	1176016	0.923504	na
17_1176209	17	1176209	0.968468	na
17_1176435	17	1176435	0.104434	na
17_1176584	17	1176584	0.433563	na
17_1179524	17	1179524	0.716015	na
17_1179908	17	1179908	0.345424	na
17_1183693	17	1183693	0.645683	na
17_1183749	17	1183749	0.980631	na
17_1183752	17	1183752	0.919481	na
17_1185494	17	1185494	0.00100674	na
17_1185809	17	1185809	0.145916	na
17_1185811	17	1185811	0.164807	na
17_1185816	17	1185816	0.0643492	na
17_1185845	17	1185845	0.270856	na
17_1185855	17	1185855	0.265017	na
17_1185862	17	1185862	0.337845	na
17_1185870	17	1185870	0.165577	na
17_1185882	17	1185882	0.142178	na
17_1185897	17	1185897	0.273785	na
17_1185898	17	1185898	0.0496639	na
17_1185901	17	1185901	0.273754	na
17_1185905	17	1185905	0.0900481	na
17_1185910	17	1185910	0.0738793	na
17_1185968	17	1185968	0.558113	na
17_1185996	17	1185996	0.16524	na
17_1186045	17	1186045	0.494314	na
17_1186084	17	1186084	0.0391662	na
17_1186100	17	1186100	0.0621631	na
17_1186375	17	1186375	0.447186	na
17_1187079	17	1187079	0.0621005	na
17_1190816	17	1190816	0.818195	na
17_1192352	17	1192352	0.650363	na
17_1193543	17	1193543	0.993177	na
17_1196157	17	1196157	0.164099	na
17_1198860	17	1198860	0.411185	na
17_1198865	17	1198865	0.5874	na
17_1198893	17	1198893	0.881537	na
17_1198925	17	1198925	0.364581	na
17_1198926	17	1198926	0.428341	na
17_1199044	17	1199044	0.712706	na
17_1199148	17	1199148	0.592108	na
17_1199557	17	1199557	0.334932	na
17_1199829	17	1199829	0.541951	na
17_1200006	17	1200006	0.174626	na
17_1200008	17	1200008	0.170709	na
17_1200067	17	1200067	0.123067	na
17_1201709	17	1201709	0.899781	na
17_1201737	17	1201737	0.494263	na
17_1201767	17	1201767	0.757246	na
17_1201796	17	1201796	0.884517	na
17_1203446	17	1203446	0.632297	na
17_1204420	17	1204420	0.646129	na
17_1206123	17	1206123	0.910179	na
17_1207192	17	1207192	0.642871	na
17_1207205	17	1207205	0.69165	na
17_1207726	17	1207726	0.573014	na
17_1208918	17	1208918	0.502805	na
17_1210438	17	1210438	0.896576	na
17_1210455	17	1210455	0.795606	na
17_1210553	17	1210553	0.482069	na
17_1210859	17	1210859	0.641179	na
17_1210862	17	1210862	0.474515	na
17_1210884	17	1210884	0.362742	na
17_1211909	17	1211909	0.27157	na
17_1212816	17	1212816	0.305235	na
17_1214433	17	1214433	0.639317	na
17_1214664	17	1214664	0.976044	na
17_1214909	17	1214909	0.815712	na
17_1214974	17	1214974	0.421446	na
17_1216946	17	1216946	0.855083	na
17_1216977	17	1216977	0.959564	na
17_1217215	17	1217215	0.433639	na
17_1219375	17	1219375	0.136142	na
17_1219395	17	1219395	0.464046	na
17_1222922	17	1222922	0.373971	na
17_1223122	17	1223122	0.371654	na
17_1223559	17	1223559	0.33385	na
17_1223564	17	1223564	0.337926	na
17_1223568	17	1223568	0.490272	na
17_1223615	17	1223615	0.852308	na
17_1223630	17	1223630	0.842257	na
17_1223631	17	1223631	0.883305	na
17_1223773	17	1223773	0.722232	na
17_1225233	17	1225233	0.454924	na
17_1225267	17	1225267	0.63139	na
17_1225378	17	1225378	0.882827	na
17_1226404	17	1226404	0.137666	na
17_1226610	17	1226610	0.906281	na
17_1230981	17	1230981	0.931887	na
17_1233224	17	1233224	0.969766	na
17_1233620	17	1233620	0.891015	na
17_1234297	17	1234297	0.182696	na
17_1234813	17	1234813	0.149046	na
17_1235602	17	1235602	0.829329	na
17_1237294	17	1237294	0.696163	na
17_1237388	17	1237388	0.388692	na
17_1243038	17	1243038	0.448241	na
17_1244073	17	1244073	0.282587	na
17_1244877	17	1244877	0.405662	na
17_1245741	17	1245741	0.813338	na
17_1247457	17	1247457	0.379191	na
17_1247527	17	1247527	0.725218	na
17_1249314	17	1249314	0.468829	na
17_1250197	17	1250197	0.829228	na
17_1252164	17	1252164	0.642115	na
17_1254993	17	1254993	0.692837	na
17_1255792	17	1255792	0.804097	na
17_1256082	17	1256082	0.698481	na
17_1257531	17	1257531	0.248415	na
17_1260292	17	1260292	0.184329	na
17_1260717	17	1260717	0.823991	na
17_1260730	17	1260730	0.341781	na
17_1261875	17	1261875	0.631151	na
17_1261924	17	1261924	0.206082	na
[truncated: 173,443 more rows]
