# Supplementary material for: Genome-wide association study in quinoa reveals selection pattern typical for crops with a short breeding history
Source: eLife. 2022 Jul 8;11:e66873. doi: 10.7554/eLife.66873 (PMC9388097; doi:10.7554/eLife.66873)
Supplement: Figure 4—source data 2. — Green and blue dots are depicting the CqPP2C5. [file elife-66873-fig4-data2.xlsx]

## Sheet: Sheet1
Fig. 4b-Source data 4b
Fig. 4b. Manhattan plot from chromosome Cq8B. Green and blue dots are depicting the CqPP2C5
Marker	Chr	Pos	p	Gene
17_63183971	17	63183971	0.860139	na
17_63186542	17	63186542	0.918234	na
17_63187959	17	63187959	0.402713	na
17_63187964	17	63187964	0.669348	na
17_63187979	17	63187979	0.537778	na
17_63189209	17	63189209	0.758006	na
17_63189212	17	63189212	0.0681271	na
17_63189267	17	63189267	0.0961885	na
17_63189308	17	63189308	0.667575	na
17_63191756	17	63191756	0.344124	na
17_63191763	17	63191763	0.872005	na
17_63191848	17	63191848	0.128166	na
17_63191862	17	63191862	0.618564	na
17_63191922	17	63191922	0.772668	na
17_63191957	17	63191957	0.739712	na
17_63191978	17	63191978	0.111475	na
17_63192130	17	63192130	0.734044	na
17_63192170	17	63192170	0.619143	na
17_63192213	17	63192213	0.413768	na
17_63192300	17	63192300	0.0971884	na
17_63192385	17	63192385	0.964407	na
17_63192401	17	63192401	0.333339	na
17_63192467	17	63192467	0.802083	na
17_63196877	17	63196877	0.644754	na
17_63199120	17	63199120	0.698725	na
17_63199197	17	63199197	0.690483	na
17_63199198	17	63199198	0.690483	na
17_63199201	17	63199201	0.644014	na
17_63199253	17	63199253	0.453787	na
17_63199263	17	63199263	0.840886	na
17_63199646	17	63199646	0.515274	na
17_63199672	17	63199672	0.321095	na
17_63202203	17	63202203	0.633433	na
17_63202245	17	63202245	0.00318824	na
17_63202327	17	63202327	0.15075	na
17_63202604	17	63202604	0.893713	na
17_63203191	17	63203191	0.425791	na
17_63204824	17	63204824	0.772307	na
17_63204875	17	63204875	0.197411	na
17_63206570	17	63206570	0.300808	na
17_63207481	17	63207481	0.932954	na
17_63208690	17	63208690	0.226929	na
17_63208741	17	63208741	0.564726	na
17_63208746	17	63208746	0.593336	na
17_63208756	17	63208756	0.870053	na
17_63209341	17	63209341	0.0899756	na
17_63209459	17	63209459	0.0867985	na
17_63209526	17	63209526	0.102907	na
17_63212685	17	63212685	0.343327	na
17_63215807	17	63215807	0.84695	na
17_63215864	17	63215864	0.213914	na
17_63215912	17	63215912	0.609547	na
17_63216262	17	63216262	0.917429	na
17_63216351	17	63216351	0.148468	na
17_63216425	17	63216425	0.875911	na
17_63216493	17	63216493	0.705417	na
17_63216645	17	63216645	0.18541	na
17_63216668	17	63216668	0.994986	na
17_63216756	17	63216756	0.260666	na
17_63216904	17	63216904	0.173608	na
17_63217277	17	63217277	0.828325	na
17_63217635	17	63217635	0.702922	na
17_63217653	17	63217653	0.403539	na
17_63218166	17	63218166	0.383559	na
17_63218252	17	63218252	0.798934	na
17_63218342	17	63218342	0.576252	na
17_63218368	17	63218368	0.458091	na
17_63218436	17	63218436	0.904344	na
17_63218553	17	63218553	0.238635	na
17_63219726	17	63219726	0.542734	na
17_63220333	17	63220333	0.378672	na
17_63220344	17	63220344	0.488866	na
17_63220659	17	63220659	0.210132	na
17_63220769	17	63220769	0.432874	na
17_63221219	17	63221219	0.185249	na
17_63221279	17	63221279	0.801966	na
17_63221387	17	63221387	0.588422	na
17_63221551	17	63221551	0.92137	na
17_63223034	17	63223034	0.77224	na
17_63223086	17	63223086	0.326792	na
17_63223236	17	63223236	0.686505	na
17_63223301	17	63223301	0.694846	na
17_63223930	17	63223930	6.91e-06	na
17_63224292	17	63224292	0.00944398	na
17_63225124	17	63225124	1.26e-05	na
17_63225292	17	63225292	5.72e-06	na
17_63225445	17	63225445	0.000617723	na
17_63225536	17	63225536	2.1e-06	na
17_63225573	17	63225573	0.642024	na
17_63225658	17	63225658	4.23e-07	na
17_63226119	17	63226119	5.3e-05	na
17_63226120	17	63226120	0.286344	na
17_63226240	17	63226240	3.82e-05	na
17_63226255	17	63226255	0.882933	na
17_63229302	17	63229302	4.52e-05	na
17_63229326	17	63229326	9.23e-08	na
17_63229487	17	63229487	0.00332311	na
17_63229554	17	63229554	7.11e-05	na
17_63229980	17	63229980	0.000558979	na
17_63230060	17	63230060	0.00775264	na
17_63230074	17	63230074	0.559107	na
17_63230443	17	63230443	0.000278992	na
17_63230458	17	63230458	0.000606117	na
17_63230602	17	63230602	0.797606	na
17_63230677	17	63230677	5.74e-05	na
17_63230772	17	63230772	0.000358912	na
17_63230852	17	63230852	0.990164	na
17_63230880	17	63230880	0.89016	na
17_63230898	17	63230898	0.000680998	na
17_63230899	17	63230899	0.00100087	na
17_63231321	17	63231321	2.3e-05	PP2C5
17_63232551	17	63232551	7.94e-05	PP2C5
17_63233231	17	63233231	0.428363	PP2C5
17_63233417	17	63233417	3.04e-05	PP2C5
17_63233423	17	63233423	1.24e-08	PP2C5
17_63233896	17	63233896	0.000458054	PP2C5
17_63234164	17	63234164	6.32e-05	PP2C5
17_63234281	17	63234281	1.04e-05	PP2C5
17_63234796	17	63234796	8.14e-08	PP2C5
17_63234804	17	63234804	0.315174	PP2C5
17_63235187	17	63235187	0.00126475	PP2C5
17_63235745	17	63235745	0.539699	PP2C5
17_63236887	17	63236887	9.57e-06	PP2C5
17_63236990	17	63236990	1.29e-07	PP2C5
17_63241536	17	63241536	5.21e-05	na
17_63242563	17	63242563	7.35e-06	na
17_63242611	17	63242611	4.85e-06	na
17_63243572	17	63243572	5.8e-05	na
17_63243597	17	63243597	0.354982	na
17_63244447	17	63244447	0.00783413	na
17_63244567	17	63244567	0.00214928	na
17_63244784	17	63244784	0.00532471	na
17_63245023	17	63245023	0.00403118	na
17_63246187	17	63246187	0.00085061	na
17_63246417	17	63246417	1.87e-05	na
17_63247205	17	63247205	0.0527152	na
17_63248009	17	63248009	0.273287	na
17_63248052	17	63248052	0.379714	na
17_63253591	17	63253591	0.576888	na
17_63253634	17	63253634	0.877055	na
17_63253638	17	63253638	0.444605	na
17_63253654	17	63253654	0.337014	na
17_63253699	17	63253699	0.383608	na
17_63257554	17	63257554	0.0449849	na
17_63257825	17	63257825	0.339369	na
17_63257902	17	63257902	0.135644	na
17_63257924	17	63257924	0.627917	na
17_63265116	17	63265116	0.048726	na
17_63265138	17	63265138	0.111335	na
17_63265144	17	63265144	0.198705	na
17_63265756	17	63265756	0.525675	na
17_63265875	17	63265875	0.157715	na
17_63265974	17	63265974	0.0022435	na
17_63266172	17	63266172	0.410023	na
17_63266886	17	63266886	0.509462	na
17_63267355	17	63267355	0.13845	na
17_63267427	17	63267427	0.0286037	na
17_63268038	17	63268038	0.0150987	na
17_63268264	17	63268264	0.152254	na
17_63270042	17	63270042	0.00522174	na
17_63271891	17	63271891	0.12924	na
17_63272256	17	63272256	0.0170398	na
17_63272432	17	63272432	0.000376001	na
17_63272723	17	63272723	0.593173	na
17_63272781	17	63272781	0.00350902	na
17_63272859	17	63272859	0.953919	na
17_63275705	17	63275705	0.064358	na
17_63278598	17	63278598	0.0176138	na
17_63278616	17	63278616	0.0743033	na
17_63278859	17	63278859	0.0130626	na
17_63278894	17	63278894	0.0600084	na
17_63278922	17	63278922	0.119564	na
17_63278948	17	63278948	0.215389	na
17_63280758	17	63280758	0.57628	na
17_63280879	17	63280879	0.0153061	na
17_63281366	17	63281366	0.0384229	na
17_63281549	17	63281549	0.498323	na
17_63281554	17	63281554	0.723757	na
17_63281613	17	63281613	0.393327	na
17_63281623	17	63281623	0.514042	na
17_63281638	17	63281638	0.807133	na
17_63282435	17	63282435	0.16611	na
17_63283287	17	63283287	0.127831	na
17_63283292	17	63283292	0.494045	na
17_63283340	17	63283340	0.68681	na
17_64825426	17	64825426	0.000213664	na
17_64825503	17	64825503	0.000133849	na
17_64826442	17	64826442	1.16e-06	na
17_64826506	17	64826506	0.333051	na
17_64826970	17	64826970	9.51e-09	na
17_64828510	17	64828510	0.000168447	na
17_64828515	17	64828515	7.33e-07	na
17_64828523	17	64828523	5.26e-05	na
17_64828869	17	64828869	0.359214	na
17_64828935	17	64828935	8.18e-10	na
17_64828954	17	64828954	2.38e-07	na
17_64828965	17	64828965	0.097428	na
17_64829041	17	64829041	0.43706	na
17_64829343	17	64829343	0.593095	na
17_64829381	17	64829381	6.67e-06	na
17_64830231	17	64830231	3.85e-06	na
17_64830274	17	64830274	1.05e-05	na
17_64830298	17	64830298	1.21e-06	na
17_64830331	17	64830331	1.49e-07	na
17_64830471	17	64830471	5.1e-10	na
17_64830510	17	64830510	0.651496	na
17_64830768	17	64830768	3.44e-06	na
17_64830817	17	64830817	4.6e-06	na
17_64833563	17	64833563	1.93e-05	na
17_64834880	17	64834880	0.355634	na
17_64835659	17	64835659	0.0877113	na
17_64836366	17	64836366	1.47e-06	na
17_64836614	17	64836614	1.94e-08	na
17_64837889	17	64837889	0.183713	na
17_64837905	17	64837905	0.861179	na
17_64837909	17	64837909	1.71e-06	na
17_64838173	17	64838173	0.830706	na
17_64838476	17	64838476	0.880824	na
17_64838656	17	64838656	1.62e-07	na
17_64839207	17	64839207	0.0964706	na
17_64839213	17	64839213	0.0671712	na
17_64839511	17	64839511	6.69e-07	na
17_64839645	17	64839645	1.77e-06	na
17_64839647	17	64839647	0.137327	na
17_64839679	17	64839679	0.185201	na
17_64839705	17	64839705	3.65e-05	na
17_64839736	17	64839736	0.867874	na
17_64840590	17	64840590	4.65e-06	na
17_64840800	17	64840800	0.39376	RING
17_64840864	17	64840864	5.9e-07	RING
17_64841096	17	64841096	1.36e-07	RING
17_64841574	17	64841574	6.18e-05	RING
17_64841599	17	64841599	0.965273	RING
17_64842006	17	64842006	0.328591	RING
17_64842031	17	64842031	0.537644	RING
17_64842133	17	64842133	2.83e-07	RING
17_64842135	17	64842135	8.01e-06	RING
17_64842165	17	64842165	1.5e-05	RING
17_64842272	17	64842272	1.99e-08	RING
17_64842332	17	64842332	0.191164	RING
17_64842637	17	64842637	0.375879	RING
17_64842676	17	64842676	0.0852451	RING
17_64842721	17	64842721	0.107264	RING
17_64842823	17	64842823	5.05e-10	RING
17_64842833	17	64842833	9.73e-09	RING
17_64842959	17	64842959	0.528113	RING
17_64843506	17	64843506	1.67e-08	RING
17_64843550	17	64843550	0.400352	RING
17_64843644	17	64843644	2.67e-07	RING
17_64844620	17	64844620	1.76e-06	na
17_64844855	17	64844855	0.183833	na
17_64844974	17	64844974	0.519205	na
17_64845021	17	64845021	0.75053	na
17_64848144	17	64848144	0.235863	na
17_64848202	17	64848202	4.27e-05	na
17_64848302	17	64848302	0.157278	na
17_64848491	17	64848491	0.925558	na
17_64848492	17	64848492	0.925558	na
17_64850406	17	64850406	0.602328	na
17_64850433	17	64850433	0.0727261	na
17_64850538	17	64850538	0.722903	na
17_64850585	17	64850585	1.38e-06	na
17_64850605	17	64850605	5e-05	na
17_64850688	17	64850688	0.733811	na
17_64850708	17	64850708	0.0877284	na
17_64850840	17	64850840	0.32509	na
17_64850872	17	64850872	0.705742	na
17_64850993	17	64850993	0.273045	na
17_64851082	17	64851082	2.76e-08	na
17_64851099	17	64851099	2.68e-07	na
17_64851113	17	64851113	2.9e-07	na
17_64852391	17	64852391	0.561123	na
17_64852480	17	64852480	0.573807	na
17_64852493	17	64852493	0.537386	na
17_64852510	17	64852510	0.875312	na
17_64852623	17	64852623	0.2513	na
17_64852767	17	64852767	0.95871	na
17_64852898	17	64852898	9.2e-07	na
17_64852913	17	64852913	0.000109037	na
17_64852933	17	64852933	0.835149	na
17_64853028	17	64853028	2.5e-08	na
17_64853077	17	64853077	0.607772	na
17_64853884	17	64853884	0.549952	na
17_64854132	17	64854132	2.76e-05	na
17_64854649	17	64854649	1.79e-06	na
17_64854727	17	64854727	9.82e-05	na
17_64854846	17	64854846	0.000285573	na
17_64854961	17	64854961	0.568977	na
17_64854970	17	64854970	0.354381	na
17_64855013	17	64855013	5.33e-07	na
17_64855041	17	64855041	0.595042	na
17_64855061	17	64855061	0.451941	na
17_64855062	17	64855062	0.482082	na
17_64855187	17	64855187	0.972487	na
17_64855218	17	64855218	1.24e-06	na
17_64855242	17	64855242	9.18e-05	na
17_64855384	17	64855384	5.21e-06	na
17_64855427	17	64855427	3.64e-06	na
17_64855538	17	64855538	4.77e-06	na
17_64855729	17	64855729	1.7e-07	na
17_64855740	17	64855740	0.589139	na
17_64855814	17	64855814	0.00214915	na
17_64855898	17	64855898	0.650791	na
17_64855901	17	64855901	0.994739	na
17_64855943	17	64855943	0.651649	na
17_64856120	17	64856120	3.78e-06	na
17_64856132	17	64856132	0.0904563	na
17_64856361	17	64856361	0.388244	na
17_64856373	17	64856373	4.67e-08	na
17_64856416	17	64856416	4.85e-06	na
17_64856569	17	64856569	0.900769	na
17_64856655	17	64856655	0.232794	na
17_64856821	17	64856821	0.000200857	na
17_64856842	17	64856842	0.334772	na
17_64856904	17	64856904	0.400549	na
17_64856919	17	64856919	1.93e-08	na
17_64857048	17	64857048	1.24e-05	na
17_64857241	17	64857241	0.29036	na
17_64857250	17	64857250	1.18e-07	na
17_64857251	17	64857251	1.18e-07	na
17_64857269	17	64857269	3.68e-08	na
17_64857398	17	64857398	0.14964	na
17_64857406	17	64857406	0.548368	na
17_64857569	17	64857569	0.822277	na
17_64858650	17	64858650	1.57e-06	na
17_64858673	17	64858673	0.302676	na
17_64858781	17	64858781	3.61e-07	na
17_64859004	17	64859004	0.000112405	na
17_64859083	17	64859083	7.29e-06	na
17_64859159	17	64859159	0.927397	na
17_64859324	17	64859324	0.177304	na
17_64859330	17	64859330	3.45e-06	na
17_64859348	17	64859348	9.13e-05	na
17_64859430	17	64859430	0.260339	na
17_64859561	17	64859561	0.374898	na
17_64859629	17	64859629	4.2e-07	na
17_64859736	17	64859736	0.163164	na
17_64859742	17	64859742	0.607621	na
17_64859769	17	64859769	4.79e-05	na
17_64859774	17	64859774	1.7e-07	na
17_64859813	17	64859813	0.303937	na
17_64859861	17	64859861	0.161465	na
17_64859991	17	64859991	3.53e-06	na
17_64860001	17	64860001	1.91e-05	na
17_64860014	17	64860014	8.32e-06	na
17_64860153	17	64860153	0.14415	na
17_64860208	17	64860208	0.403575	na
17_64860220	17	64860220	0.712083	na
17_64860279	17	64860279	3.11e-05	na
17_64860360	17	64860360	4.27e-07	na
17_64861451	17	64861451	8.35e-06	na
17_64861482	17	64861482	0.55565	na
17_64861528	17	64861528	0.541682	na
17_64861538	17	64861538	0.000932374	na
17_64861634	17	64861634	0.000615531	na
17_64862480	17	64862480	0.545941	na
17_64884343	17	64884343	0.122897	na
17_64884391	17	64884391	0.208526	na
17_64884864	17	64884864	0.0165053	na
