# Supplementary material for: Genome-wide association study in quinoa reveals selection pattern typical for crops with a short breeding history
Source: eLife. 2022 Jul 8;11:e66873. doi: 10.7554/eLife.66873 (PMC9388097; doi:10.7554/eLife.66873)
Supplement: Figure 4—source data 3. [file elife-66873-fig4-data3.xlsx]

## Sheet: Sheet1
Fig. 4c-Source data 4c
Fig.4: . Differences in thousand seed weight between five CqPP2C (d) and seven CqRING haplotypes (e).
ID	Hap	QP	year	TKW	Gene
10176	Hap1	QP-276	Y_2018	1.92	RING
10183	Hap1	QP-345	Y_2018	1.47333	RING
S1A10	Hap1	QP-076	Y_2018	1.26667	RING
S1A2	Hap1	QP-014	Y_2018	1.06667	RING
S1A3	Hap1	QP-022	Y_2018	1.46	RING
S1B4	Hap1	QP-029	Y_2018	1.12885	RING
S1C4	Hap1	QP-028	Y_2018	1.3223	RING
S1D2	Hap1	QP-012	Y_2018	1.12667	RING
S1E8	Hap1	QP-057	Y_2018	1.40667	RING
S1F2	Hap1	QP-010	Y_2018	1.24667	RING
S1G11	Hap1	QP-078	Y_2018	1.39333	RING
S1H2	Hap1	QP-008	Y_2018	1.11885	RING
S1H4	Hap1	QP-023	Y_2018	1.32	RING
S2B9	Hap1	QP-162	Y_2018	1.47333	RING
S2C2	Hap1	QP-106	Y_2018	NA	RING
S2C4	Hap1	QP-121	Y_2018	1.54667	RING
S2C7	Hap1	QP-145	Y_2018	1.27333	RING
S2G3	Hap1	QP-110	Y_2018	1.18667	RING
S3A10	Hap1	QP-264	Y_2018	NA	RING
S3A4	Hap1	QP-216	Y_2018	1.9	RING
S3A8	Hap1	QP-248	Y_2018	2.02	RING
S3D1	Hap1	QP-193	Y_2018	2.01333	RING
S3D8	Hap1	QP-245	Y_2018	1.02667	RING
S3D9	Hap1	QP-253	Y_2018	1.25333	RING
S3E8	Hap1	QP-244	Y_2018	1.19333	RING
S3F4	Hap1	QP-211	Y_2018	1.68	RING
S3F7	Hap1	QP-235	Y_2018	2.08	RING
S3F8	Hap1	QP-243	Y_2018	1.33225	RING
S3H3	Hap1	QP-201	Y_2018	0.9223	RING
S3H8	Hap1	QP-241	Y_2018	1.46	RING
S4A1	Hap1	QP-288	Y_2018	1.34667	RING
S4A4	Hap1	QP-317	Y_2018	1.32667	RING
S4A5	Hap1	QP-325	Y_2018	1.57333	RING
S4C10	Hap1	QP-278	Y_2018	1.37333	RING
S4D7	Hap1	QP-328	Y_2018	1.07333	RING
S4E11	Hap1	QP-270	Y_2018	1.34667	RING
S4E7	Hap1	QP-327	Y_2018	1.46	RING
S4E9	Hap1	QP-184	Y_2018	1.26667	RING
S4F3	Hap1	QP-299	Y_2018	0.986667	RING
S4G2	Hap1	QP-290	Y_2018	1.37388	RING
S4G5	Hap1	QP-319	Y_2018	1.8023	RING
S4H8	Hap1	QP-085	Y_2018	1.28	RING
S3B6	Hap2	QP-231	Y_2018	2.63333	RING
S3E3	Hap2	QP-204	Y_2018	1.62667	RING
S4A9	Hap2	QP-188	Y_2018	1.20667	RING
S4C1	Hap2	QP-286	Y_2018	0.83885	RING
S1C10	Hap3	QP-074	Y_2018	1.08667	RING
S1C7	Hap3	QP-052	Y_2018	1.00667	RING
S1E11	Hap3	QP-080	Y_2018	0.906667	RING
S1G4	Hap3	QP-024	Y_2018	0.90885	RING
S2A9	Hap3	QP-163	Y_2018	1.09885	RING
S2B5	Hap3	QP-130	Y_2018	1.55333	RING
S2E7	Hap3	QP-143	Y_2018	1.07333	RING
S3C6	Hap3	QP-230	Y_2018	NA	RING
S3D11	Hap3	QP-269	Y_2018	2.22667	RING
S3E9	Hap3	QP-252	Y_2018	1.27333	RING
S3G3	Hap3	QP-202	Y_2018	0.88885	RING
S4B1	Hap3	QP-287	Y_2018	NA	RING
S4D6	Hap3	QP-333	Y_2018	1.46388	RING
S4F2	Hap3	QP-291	Y_2018	1.46667	RING
S4G9	Hap3	QP-182	Y_2018	1.30667	RING
S4H10	Hap3	QP-273	Y_2018	0.96885	RING
S4H4	Hap3	QP-305	Y_2018	1.46667	RING
10178	Hap4	QP-164	Y_2018	1.80545	RING
S1A5	Hap4	QP-038	Y_2018	2.54667	RING
S1A8	Hap4	QP-061	Y_2018	2.52	RING
S1A9	Hap4	QP-068	Y_2018	1.68667	RING
S1B3	Hap4	QP-021	Y_2018	1.54667	RING
S1B8	Hap4	QP-060	Y_2018	2.91333	RING
S1C6	Hap4	QP-044	Y_2018	2.58	RING
S1H6	Hap4	QP-039	Y_2018	1.61333	RING
S2D1	Hap4	QP-098	Y_2018	1.42667	RING
S2D11	Hap4	QP-177	Y_2018	1.55333	RING
S2E11	Hap4	QP-176	Y_2018	2.22667	RING
S2F8	Hap4	QP-150	Y_2018	1.83333	RING
S2G6	Hap4	QP-133	Y_2018	2.56667	RING
S2H11	Hap4	QP-172	Y_2018	2.19333	RING
S2H2	Hap4	QP-102	Y_2018	2.11333	RING
S2H8	Hap4	QP-148	Y_2018	2.02	RING
S2H9	Hap4	QP-156	Y_2018	1.54	RING
S3C3	Hap4	QP-206	Y_2018	1.18667	RING
S3D4	Hap4	QP-213	Y_2018	2.16667	RING
S3E4	Hap4	QP-212	Y_2018	1.68885	RING
S3E6	Hap4	QP-228	Y_2018	1.44	RING
S3F1	Hap4	QP-191	Y_2018	1.74667	RING
S3H4	Hap4	QP-209	Y_2018	0.932249	RING
S4A10	Hap4	QP-280	Y_2018	2.24667	RING
S4A7	Hap4	QP-084	Y_2018	2.24667	RING
S4A8	Hap4	QP-092	Y_2018	1.52667	RING
S4B7	Hap4	QP-083	Y_2018	1.74	RING
S4B8	Hap4	QP-091	Y_2018	1.76885	RING
S4B9	Hap4	QP-187	Y_2018	1.95333	RING
S4C8	Hap4	QP-090	Y_2018	2.28	RING
S4D9	Hap4	QP-185	Y_2018	1.92	RING
S4E8	Hap4	QP-088	Y_2018	NA	RING
S4F10	Hap4	QP-275	Y_2018	1.87333	RING
S4F11	Hap4	QP-180	Y_2018	1.73333	RING
S4F5	Hap4	QP-320	Y_2018	1.49225	RING
S4F8	Hap4	QP-087	Y_2018	2.15333	RING
S4G8	Hap4	QP-086	Y_2018	2.55333	RING
S4H11	Hap4	QP-178	Y_2018	2.06667	RING
S4H3	Hap4	QP-297	Y_2018	2.34	RING
S4H9	Hap4	QP-181	Y_2018	2.42667	RING
S1F5	Hap5	QP-033	Y_2018	NA	RING
S2A1	Hap5	QP-101	Y_2018	1.60885	RING
S2B4	Hap5	QP-122	Y_2018	1.61885	RING
S3A5	Hap5	QP-224	Y_2018	2.56	RING
S3C5	Hap5	QP-222	Y_2018	0.993333	RING
S3D7	Hap5	QP-237	Y_2018	1.33333	RING
S3F2	Hap5	QP-199	Y_2018	1.97333	RING
S3H10	Hap5	QP-257	Y_2018	1.81333	RING
S4B2	Hap5	QP-295	Y_2018	1.18885	RING
S4B4	Hap5	QP-316	Y_2018	NA	RING
S4F6	Hap5	QP-331	Y_2018	1.57225	RING
S4G10	Hap5	QP-274	Y_2018	NA	RING
S4H1	Hap5	QP-281	Y_2018	NA	RING
S4H2	Hap5	QP-289	Y_2018	NA	RING
S1A7	Hap6	QP-053	Y_2018	1.9	RING
S1B5	Hap6	QP-037	Y_2018	2.16667	RING
S1D11	Hap6	QP-081	Y_2018	1.64	RING
S1F7	Hap6	QP-049	Y_2018	2.43333	RING
S1G6	Hap6	QP-040	Y_2018	1.8	RING
S1G9	Hap6	QP-063	Y_2018	2.84667	RING
S2D4	Hap6	QP-120	Y_2018	1.76667	RING
S2H5	Hap6	QP-124	Y_2018	1.25333	RING
S2H7	Hap6	QP-140	Y_2018	2.10667	RING
S3A9	Hap6	QP-256	Y_2018	1.9	RING
S3B8	Hap6	QP-247	Y_2018	NA	RING
S3B9	Hap6	QP-255	Y_2018	1.33333	RING
S3C1	Hap6	QP-194	Y_2018	2.39333	RING
S3C7	Hap6	QP-238	Y_2018	1.26	RING
S3E11	Hap6	QP-268	Y_2018	0.983876	RING
S3F10	Hap6	QP-259	Y_2018	1.08667	RING
S3G5	Hap6	QP-218	Y_2018	1.25333	RING
S3G8	Hap6	QP-242	Y_2018	1.76727	RING
S3H7	Hap6	QP-233	Y_2018	3.48	RING
S3H9	Hap6	QP-249	Y_2018	1.8823	RING
S4C7	Hap6	QP-082	Y_2018	1.73885	RING
S4D2	Hap6	QP-293	Y_2018	1.85333	RING
S4E2	Hap6	QP-292	Y_2018	2.2423	RING
S4E4	Hap6	QP-308	Y_2018	2.04	RING
S4F1	Hap6	QP-283	Y_2018	2.5	RING
S4F7	Hap6	QP-326	Y_2018	1.44667	RING
S4F9	Hap6	QP-183	Y_2018	2.46727	RING
S4G4	Hap6	QP-306	Y_2018	NA	RING
S1A6	Hap7	QP-046	Y_2018	3.42667	RING
S1B1	Hap7	QP-006	Y_2018	3.31333	RING
S1C1	Hap7	QP-005	Y_2018	3.37333	RING
S1D10	Hap7	QP-073	Y_2018	2.16667	RING
S1D3	Hap7	QP-019	Y_2018	2.67333	RING
S1D4	Hap7	QP-027	Y_2018	1.47333	RING
S1D5	Hap7	QP-035	Y_2018	2.50667	RING
S1D6	Hap7	QP-043	Y_2018	3.49333	RING
S1E1	Hap7	QP-003	Y_2018	2.57333	RING
S1E4	Hap7	QP-026	Y_2018	2.7	RING
S1E9	Hap7	QP-065	Y_2018	2.92	RING
S1F1	Hap7	QP-002	Y_2018	2.92667	RING
S1F9	Hap7	QP-064	Y_2018	1.58	RING
S1G10	Hap7	QP-070	Y_2018	1.32667	RING
S1G3	Hap7	QP-016	Y_2018	1.94	RING
S1G5	Hap7	QP-032	Y_2018	2.96	RING
S1G8	Hap7	QP-055	Y_2018	2.66	RING
S2B2	Hap7	QP-107	Y_2018	1.94667	RING
S2C10	Hap7	QP-169	Y_2018	3.14	RING
S2C6	Hap7	QP-137	Y_2018	2.07333	RING
S2D3	Hap7	QP-113	Y_2018	3.26667	RING
S2D5	Hap7	QP-128	Y_2018	1.75333	RING
S2E1	Hap7	QP-097	Y_2018	1.54667	RING
S2F1	Hap7	QP-096	Y_2018	3.01333	RING
S2F3	Hap7	QP-111	Y_2018	1.50667	RING
S2G1	Hap7	QP-095	Y_2018	1.66727	RING
S2G2	Hap7	QP-103	Y_2018	2.9	RING
S2G4	Hap7	QP-118	Y_2018	2.10667	RING
S2H3	Hap7	QP-109	Y_2018	2.64667	RING
S3A6	Hap7	QP-232	Y_2018	2.54667	RING
S3D5	Hap7	QP-221	Y_2018	2.24667	RING
S3E5	Hap7	QP-220	Y_2018	2.57333	RING
S3G4	Hap7	QP-210	Y_2018	1.08667	RING
S3G6	Hap7	QP-226	Y_2018	NA	RING
S4B6	Hap7	QP-179	Y_2018	3.09333	RING
S4D8	Hap7	QP-089	Y_2018	2.4	RING
10176	Hap1	QP-276	Y_2019	1.52	RING
10183	Hap1	QP-345	Y_2019	1.46667	RING
S1A10	Hap1	QP-076	Y_2019	1.49333	RING
S1A2	Hap1	QP-014	Y_2019	1.34667	RING
S1A3	Hap1	QP-022	Y_2019	1.44	RING
S1B4	Hap1	QP-029	Y_2019	1.16	RING
S1C4	Hap1	QP-028	Y_2019	1.37333	RING
S1D2	Hap1	QP-012	Y_2019	1.13333	RING
S1E8	Hap1	QP-057	Y_2019	1.50667	RING
S1F2	Hap1	QP-010	Y_2019	1.38667	RING
S1G11	Hap1	QP-078	Y_2019	1.55333	RING
S1H2	Hap1	QP-008	Y_2019	1.06667	RING
S1H4	Hap1	QP-023	Y_2019	1.27333	RING
S2B9	Hap1	QP-162	Y_2019	1.74	RING
S2C2	Hap1	QP-106	Y_2019	1.89333	RING
S2C4	Hap1	QP-121	Y_2019	1.56	RING
S2C7	Hap1	QP-145	Y_2019	1.34	RING
S2G3	Hap1	QP-110	Y_2019	1.27703	RING
S3A10	Hap1	QP-264	Y_2019	1.49778	RING
S3A4	Hap1	QP-216	Y_2019	1.90667	RING
S3A8	Hap1	QP-248	Y_2019	2.15333	RING
S3D1	Hap1	QP-193	Y_2019	1.75333	RING
S3D8	Hap1	QP-245	Y_2019	1.38	RING
S3D9	Hap1	QP-253	Y_2019	1.26667	RING
S3E8	Hap1	QP-244	Y_2019	1.08	RING
S3F4	Hap1	QP-211	Y_2019	1.89333	RING
S3F7	Hap1	QP-235	Y_2019	2.24667	RING
S3F8	Hap1	QP-243	Y_2019	1.40667	RING
S3H3	Hap1	QP-201	Y_2019	1.45333	RING
S3H8	Hap1	QP-241	Y_2019	1.31333	RING
S4A1	Hap1	QP-288	Y_2019	1.54667	RING
S4A4	Hap1	QP-317	Y_2019	1.48	RING
S4A5	Hap1	QP-325	Y_2019	1.76	RING
S4C10	Hap1	QP-278	Y_2019	1.35333	RING
S4D7	Hap1	QP-328	Y_2019	1.21333	RING
S4E11	Hap1	QP-270	Y_2019	1.36667	RING
S4E7	Hap1	QP-327	Y_2019	1.41333	RING
S4E9	Hap1	QP-184	Y_2019	1.59333	RING
S4F3	Hap1	QP-299	Y_2019	1.20667	RING
S4G2	Hap1	QP-290	Y_2019	1.41333	RING
S4G5	Hap1	QP-319	Y_2019	1.82111	RING
S4H8	Hap1	QP-085	Y_2019	1.29333	RING
S3B6	Hap2	QP-231	Y_2019	2.5	RING
S3E3	Hap2	QP-204	Y_2019	NA	RING
S4A9	Hap2	QP-188	Y_2019	1.39333	RING
S4C1	Hap2	QP-286	Y_2019	1.20667	RING
S1C10	Hap3	QP-074	Y_2019	1.34667	RING
S1C7	Hap3	QP-052	Y_2019	1.06	RING
S1E11	Hap3	QP-080	Y_2019	1.36667	RING
S1G4	Hap3	QP-024	Y_2019	1.29333	RING
S2A9	Hap3	QP-163	Y_2019	1.38	RING
S2B5	Hap3	QP-130	Y_2019	1.62667	RING
S2E7	Hap3	QP-143	Y_2019	1.32667	RING
S3C6	Hap3	QP-230	Y_2019	1.11186	RING
S3D11	Hap3	QP-269	Y_2019	2.1	RING
S3E9	Hap3	QP-252	Y_2019	1.33333	RING
S3G3	Hap3	QP-202	Y_2019	1.00667	RING
S4B1	Hap3	QP-287	Y_2019	1.45333	RING
S4D6	Hap3	QP-333	Y_2019	1.33333	RING
S4F2	Hap3	QP-291	Y_2019	1.58667	RING
S4G9	Hap3	QP-182	Y_2019	1.42	RING
S4H10	Hap3	QP-273	Y_2019	1.36667	RING
S4H4	Hap3	QP-305	Y_2019	1.73333	RING
10178	Hap4	QP-164	Y_2019	2.12667	RING
S1A5	Hap4	QP-038	Y_2019	2.42	RING
S1A8	Hap4	QP-061	Y_2019	2.5	RING
S1A9	Hap4	QP-068	Y_2019	1.68	RING
S1B3	Hap4	QP-021	Y_2019	1.92	RING
S1B8	Hap4	QP-060	Y_2019	2.97333	RING
S1C6	Hap4	QP-044	Y_2019	2.37333	RING
S1H6	Hap4	QP-039	Y_2019	1.84	RING
S2D1	Hap4	QP-098	Y_2019	1.68667	RING
S2D11	Hap4	QP-177	Y_2019	1.75333	RING
S2E11	Hap4	QP-176	Y_2019	2.49333	RING
S2F8	Hap4	QP-150	Y_2019	1.72	RING
S2G6	Hap4	QP-133	Y_2019	2.48667	RING
S2H11	Hap4	QP-172	Y_2019	2.06	RING
S2H2	Hap4	QP-102	Y_2019	2.02667	RING
S2H8	Hap4	QP-148	Y_2019	1.95333	RING
S2H9	Hap4	QP-156	Y_2019	1.38	RING
S3C3	Hap4	QP-206	Y_2019	1.26	RING
S3D4	Hap4	QP-213	Y_2019	2.27333	RING
S3E4	Hap4	QP-212	Y_2019	1.88667	RING
S3E6	Hap4	QP-228	Y_2019	1.5	RING
S3F1	Hap4	QP-191	Y_2019	1.83333	RING
S3H4	Hap4	QP-209	Y_2019	1.4	RING
S4A10	Hap4	QP-280	Y_2019	1.81333	RING
S4A7	Hap4	QP-084	Y_2019	2.44	RING
S4A8	Hap4	QP-092	Y_2019	1.80667	RING
S4B7	Hap4	QP-083	Y_2019	1.75333	RING
S4B8	Hap4	QP-091	Y_2019	1.78667	RING
S4B9	Hap4	QP-187	Y_2019	1.84	RING
S4C8	Hap4	QP-090	Y_2019	2.03333	RING
S4D9	Hap4	QP-185	Y_2019	2.14667	RING
S4E8	Hap4	QP-088	Y_2019	1.66667	RING
S4F10	Hap4	QP-275	Y_2019	1.65333	RING
S4F11	Hap4	QP-180	Y_2019	2.04	RING
S4F5	Hap4	QP-320	Y_2019	1.87333	RING
S4F8	Hap4	QP-087	Y_2019	2.34667	RING
S4G8	Hap4	QP-086	Y_2019	2.27333	RING
S4H11	Hap4	QP-178	Y_2019	2.02	RING
S4H3	Hap4	QP-297	Y_2019	2.46	RING
S4H9	Hap4	QP-181	Y_2019	2.48667	RING
S1F5	Hap5	QP-033	Y_2019	1.78	RING
S2A1	Hap5	QP-101	Y_2019	1.90667	RING
S2B4	Hap5	QP-122	Y_2019	1.71333	RING
S3A5	Hap5	QP-224	Y_2019	2.31111	RING
S3C5	Hap5	QP-222	Y_2019	1.44	RING
S3D7	Hap5	QP-237	Y_2019	1.54667	RING
S3F2	Hap5	QP-199	Y_2019	2.08	RING
S3H10	Hap5	QP-257	Y_2019	1.75333	RING
S4B2	Hap5	QP-295	Y_2019	1.61111	RING
S4B4	Hap5	QP-316	Y_2019	1.48	RING
S4F6	Hap5	QP-331	Y_2019	1.48667	RING
S4G10	Hap5	QP-274	Y_2019	1.96667	RING
S4H1	Hap5	QP-281	Y_2019	1.70111	RING
S4H2	Hap5	QP-289	Y_2019	2.04667	RING
S1A7	Hap6	QP-053	Y_2019	1.92	RING
S1B5	Hap6	QP-037	Y_2019	2.01333	RING
S1D11	Hap6	QP-081	Y_2019	2.2	RING
S1F7	Hap6	QP-049	Y_2019	2.68	RING
S1G6	Hap6	QP-040	Y_2019	2.14594	RING
S1G9	Hap6	QP-063	Y_2019	2.60667	RING
S2D4	Hap6	QP-120	Y_2019	1.76	RING
S2H5	Hap6	QP-124	Y_2019	1.56	RING
S2H7	Hap6	QP-140	Y_2019	2.24667	RING
S3A9	Hap6	QP-256	Y_2019	1.90667	RING
S3B8	Hap6	QP-247	Y_2019	1.92667	RING
S3B9	Hap6	QP-255	Y_2019	1.49333	RING
S3C1	Hap6	QP-194	Y_2019	2.21333	RING
S3C7	Hap6	QP-238	Y_2019	1.35333	RING
S3E11	Hap6	QP-268	Y_2019	1.38667	RING
S3F10	Hap6	QP-259	Y_2019	1.40667	RING
S3G5	Hap6	QP-218	Y_2019	1.36	RING
S3G8	Hap6	QP-242	Y_2019	1.52667	RING
S3H7	Hap6	QP-233	Y_2019	2.74	RING
S3H9	Hap6	QP-249	Y_2019	1.72667	RING
S4C7	Hap6	QP-082	Y_2019	1.94667	RING
S4D2	Hap6	QP-293	Y_2019	2.21333	RING
S4E2	Hap6	QP-292	Y_2019	2.18667	RING
S4E4	Hap6	QP-308	Y_2019	1.84667	RING
S4F1	Hap6	QP-283	Y_2019	2.3	RING
S4F7	Hap6	QP-326	Y_2019	1.57333	RING
S4F9	Hap6	QP-183	Y_2019	2.34667	RING
S4G4	Hap6	QP-306	Y_2019	1.54	RING
S1A6	Hap7	QP-046	Y_2019	3.17333	RING
S1B1	Hap7	QP-006	Y_2019	3.34667	RING
S1C1	Hap7	QP-005	Y_2019	3.08667	RING
S1D10	Hap7	QP-073	Y_2019	2.26667	RING
S1D3	Hap7	QP-019	Y_2019	2.62	RING
S1D4	Hap7	QP-027	Y_2019	1.58667	RING
S1D5	Hap7	QP-035	Y_2019	2.32	RING
S1D6	Hap7	QP-043	Y_2019	3.42	RING
S1E1	Hap7	QP-003	Y_2019	2.33333	RING
S1E4	Hap7	QP-026	Y_2019	2.83333	RING
S1E9	Hap7	QP-065	Y_2019	2.84667	RING
S1F1	Hap7	QP-002	Y_2019	2.72111	RING
S1F9	Hap7	QP-064	Y_2019	1.7	RING
S1G10	Hap7	QP-070	Y_2019	1.5	RING
S1G3	Hap7	QP-016	Y_2019	1.97111	RING
S1G5	Hap7	QP-032	Y_2019	2.74	RING
S1G8	Hap7	QP-055	Y_2019	2.69333	RING
S2B2	Hap7	QP-107	Y_2019	1.75111	RING
S2C10	Hap7	QP-169	Y_2019	3.25333	RING
S2C6	Hap7	QP-137	Y_2019	1.79333	RING
S2D3	Hap7	QP-113	Y_2019	3.08111	RING
S2D5	Hap7	QP-128	Y_2019	1.59333	RING
S2E1	Hap7	QP-097	Y_2019	1.61333	RING
S2F1	Hap7	QP-096	Y_2019	2.89333	RING
S2F3	Hap7	QP-111	Y_2019	1.57333	RING
S2G1	Hap7	QP-095	Y_2019	1.68667	RING
S2G2	Hap7	QP-103	Y_2019	3.16111	RING
S2G4	Hap7	QP-118	Y_2019	1.96667	RING
S2H3	Hap7	QP-109	Y_2019	3.01333	RING
S3A6	Hap7	QP-232	Y_2019	2.67333	RING
S3D5	Hap7	QP-221	Y_2019	2.38667	RING
S3E5	Hap7	QP-220	Y_2019	2.46	RING
S3G4	Hap7	QP-210	Y_2019	1.43333	RING
S3G6	Hap7	QP-226	Y_2019	1.69111	RING
S4B6	Hap7	QP-179	Y_2019	2.84	RING
S4D8	Hap7	QP-089	Y_2019	2.19333	RING
S1B5	Hap1	QP-037	Y_2018	2.16667	PP2C
S2H2	Hap1	QP-102	Y_2018	2.11333	PP2C
S2H4	Hap1	QP-117	Y_2018	1.77225	PP2C
S2B8	Hap1	QP-154	Y_2018	2.08667	PP2C
10178	Hap1	QP-164	Y_2018	1.80545	PP2C
S2E10	Hap1	QP-167	Y_2018	NA	PP2C
S2A10	Hap1	QP-171	Y_2018	1.25333	PP2C
S3C5	Hap1	QP-222	Y_2018	0.993333	PP2C
S3B6	Hap1	QP-231	Y_2018	2.63333	PP2C
S3C7	Hap1	QP-238	Y_2018	1.26	PP2C
S3G8	Hap1	QP-242	Y_2018	1.76727	PP2C
S3D10	Hap1	QP-261	Y_2018	2.06667	PP2C
10176	Hap1	QP-276	Y_2018	1.92	PP2C
S4B2	Hap1	QP-295	Y_2018	1.18885	PP2C
S4A3	Hap1	QP-304	Y_2018	0.907275	PP2C
S4B5	Hap1	QP-324	Y_2018	2.2	PP2C
S4E6	Hap1	QP-332	Y_2018	2.28667	PP2C
S2G5	Hap2	QP-125	Y_2018	1.80667	PP2C
S2A8	Hap2	QP-155	Y_2018	1.79333	PP2C
S3E10	Hap2	QP-260	Y_2018	NA	PP2C
S4F5	Hap2	QP-320	Y_2018	1.49225	PP2C
S1F1	Hap3	QP-002	Y_2018	2.92667	PP2C
S1E1	Hap3	QP-003	Y_2018	2.57333	PP2C
S1D1	Hap3	QP-004	Y_2018	3.43333	PP2C
S1F3	Hap3	QP-017	Y_2018	2.08667	PP2C
S1E3	Hap3	QP-018	Y_2018	3.00667	PP2C
S1D3	Hap3	QP-019	Y_2018	2.67333	PP2C
S1E4	Hap3	QP-026	Y_2018	2.7	PP2C
S1D5	Hap3	QP-035	Y_2018	2.50667	PP2C
S1F6	Hap3	QP-041	Y_2018	2.8	PP2C
S1E6	Hap3	QP-042	Y_2018	3.19333	PP2C
S1D6	Hap3	QP-043	Y_2018	3.49333	PP2C
S1B6	Hap3	QP-045	Y_2018	2.36667	PP2C
S1A6	Hap3	QP-046	Y_2018	3.42667	PP2C
S1H7	Hap3	QP-047	Y_2018	1.82	PP2C
S1F7	Hap3	QP-049	Y_2018	2.43333	PP2C
S1H8	Hap3	QP-054	Y_2018	1.96	PP2C
S1D8	Hap3	QP-058	Y_2018	1.50667	PP2C
S1C8	Hap3	QP-059	Y_2018	2.28667	PP2C
S1G9	Hap3	QP-063	Y_2018	2.84667	PP2C
S1E9	Hap3	QP-065	Y_2018	2.92	PP2C
S1F11	Hap3	QP-079	Y_2018	2.06667	PP2C
S1D11	Hap3	QP-081	Y_2018	1.64	PP2C
S4E8	Hap3	QP-088	Y_2018	NA	PP2C
S4A8	Hap3	QP-092	Y_2018	1.52667	PP2C
S2F1	Hap3	QP-096	Y_2018	3.01333	PP2C
S2B2	Hap3	QP-107	Y_2018	1.94667	PP2C
S2D3	Hap3	QP-113	Y_2018	3.26667	PP2C
S2G4	Hap3	QP-118	Y_2018	2.10667	PP2C
S2D4	Hap3	QP-120	Y_2018	1.76667	PP2C
S2F5	Hap3	QP-126	Y_2018	2.46	PP2C
S2G6	Hap3	QP-133	Y_2018	2.56667	PP2C
S2A6	Hap3	QP-139	Y_2018	2.79333	PP2C
S2H7	Hap3	QP-140	Y_2018	2.10667	PP2C
S2H9	Hap3	QP-156	Y_2018	1.54	PP2C
S2C10	Hap3	QP-169	Y_2018	3.14	PP2C
S2F11	Hap3	QP-175	Y_2018	3.46	PP2C
S2D11	Hap3	QP-177	Y_2018	1.55333	PP2C
S4H11	Hap3	QP-178	Y_2018	2.06667	PP2C
S4B6	Hap3	QP-179	Y_2018	3.09333	PP2C
S4B9	Hap3	QP-187	Y_2018	1.95333	PP2C
S3E1	Hap3	QP-192	Y_2018	1.20667	PP2C
S3C1	Hap3	QP-194	Y_2018	2.39333	PP2C
S3C4	Hap3	QP-214	Y_2018	1.50667	PP2C
S3E5	Hap3	QP-220	Y_2018	2.57333	PP2C
S3A6	Hap3	QP-232	Y_2018	2.54667	PP2C
S3B8	Hap3	QP-247	Y_2018	NA	PP2C
S3H9	Hap3	QP-249	Y_2018	1.8823	PP2C
S3B9	Hap3	QP-255	Y_2018	1.33333	PP2C
S3A9	Hap3	QP-256	Y_2018	1.9	PP2C
S3E11	Hap3	QP-268	Y_2018	0.983876	PP2C
S4G10	Hap3	QP-274	Y_2018	NA	PP2C
S4F10	Hap3	QP-275	Y_2018	1.87333	PP2C
S4B10	Hap3	QP-279	Y_2018	NA	PP2C
S4A10	Hap3	QP-280	Y_2018	2.24667	PP2C
S4F1	Hap3	QP-283	Y_2018	2.5	PP2C
S4H3	Hap3	QP-297	Y_2018	2.34	PP2C
S4E4	Hap3	QP-308	Y_2018	2.04	PP2C
S1F2	Hap4	QP-010	Y_2018	1.24667	PP2C
S1C2	Hap4	QP-013	Y_2018	1.23333	PP2C
S1H3	Hap4	QP-015	Y_2018	NA	PP2C
S1C3	Hap4	QP-020	Y_2018	0.906667	PP2C
S1A3	Hap4	QP-022	Y_2018	1.46	PP2C
S1H4	Hap4	QP-023	Y_2018	1.32	PP2C
S1G4	Hap4	QP-024	Y_2018	0.90885	PP2C
S1C4	Hap4	QP-028	Y_2018	1.3223	PP2C
S1B4	Hap4	QP-029	Y_2018	1.12885	PP2C
S1C7	Hap4	QP-052	Y_2018	1.00667	PP2C
S1E8	Hap4	QP-057	Y_2018	1.40667	PP2C
S1H10	Hap4	QP-069	Y_2018	1.42667	PP2C
S1G10	Hap4	QP-070	Y_2018	1.32667	PP2C
S1F10	Hap4	QP-071	Y_2018	1.25333	PP2C
S1C10	Hap4	QP-074	Y_2018	1.08667	PP2C
S1A10	Hap4	QP-076	Y_2018	1.26667	PP2C
S1H11	Hap4	QP-077	Y_2018	1.31333	PP2C
S1E11	Hap4	QP-080	Y_2018	0.906667	PP2C
S2F2	Hap4	QP-104	Y_2018	2.13333	PP2C
S2C2	Hap4	QP-106	Y_2018	NA	PP2C
S2B4	Hap4	QP-122	Y_2018	1.61885	PP2C
S2C5	Hap4	QP-129	Y_2018	1.25333	PP2C
S2B5	Hap4	QP-130	Y_2018	1.55333	PP2C
S2A5	Hap4	QP-131	Y_2018	1.16	PP2C
S2B6	Hap4	QP-138	Y_2018	1.65333	PP2C
S2F7	Hap4	QP-142	Y_2018	1.16667	PP2C
S2C7	Hap4	QP-145	Y_2018	1.27333	PP2C
S2G8	Hap4	QP-149	Y_2018	1.38667	PP2C
S2D8	Hap4	QP-152	Y_2018	1.31333	PP2C
S2C9	Hap4	QP-161	Y_2018	1.68667	PP2C
S2A9	Hap4	QP-163	Y_2018	1.09885	PP2C
S2F10	Hap4	QP-166	Y_2018	1.23333	PP2C
S2D10	Hap4	QP-168	Y_2018	1.38545	PP2C
S2B10	Hap4	QP-170	Y_2018	1.33885	PP2C
S4G9	Hap4	QP-182	Y_2018	1.30667	PP2C
S4A9	Hap4	QP-188	Y_2018	1.20667	PP2C
S3D1	Hap4	QP-193	Y_2018	2.01333	PP2C
S3F2	Hap4	QP-199	Y_2018	1.97333	PP2C
S3G3	Hap4	QP-202	Y_2018	0.88885	PP2C
S3E3	Hap4	QP-204	Y_2018	1.62667	PP2C
S3B3	Hap4	QP-207	Y_2018	1.04667	PP2C
S3A3	Hap4	QP-208	Y_2018	0.745451	PP2C
S3F4	Hap4	QP-211	Y_2018	1.68	PP2C
S3B4	Hap4	QP-215	Y_2018	1.54	PP2C
S3A4	Hap4	QP-216	Y_2018	1.9	PP2C
S3G5	Hap4	QP-218	Y_2018	1.25333	PP2C
S3F5	Hap4	QP-219	Y_2018	1.43333	PP2C
S3F6	Hap4	QP-227	Y_2018	0.906667	PP2C
S3D6	Hap4	QP-229	Y_2018	2.34667	PP2C
S3D7	Hap4	QP-237	Y_2018	1.33333	PP2C
S3H8	Hap4	QP-241	Y_2018	1.46	PP2C
S3F8	Hap4	QP-243	Y_2018	1.33225	PP2C
S3E8	Hap4	QP-244	Y_2018	1.19333	PP2C
S3D8	Hap4	QP-245	Y_2018	1.02667	PP2C
S3A8	Hap4	QP-248	Y_2018	2.02	PP2C
S3E9	Hap4	QP-252	Y_2018	1.27333	PP2C
S3D9	Hap4	QP-253	Y_2018	1.25333	PP2C
S3H10	Hap4	QP-257	Y_2018	1.81333	PP2C
S3C10	Hap4	QP-262	Y_2018	2.02	PP2C
S3A10	Hap4	QP-264	Y_2018	NA	PP2C
S3D11	Hap4	QP-269	Y_2018	2.22667	PP2C
S4E11	Hap4	QP-270	Y_2018	1.34667	PP2C
S4D11	Hap4	QP-271	Y_2018	1.19333	PP2C
S4B1	Hap4	QP-287	Y_2018	NA	PP2C
S4A1	Hap4	QP-288	Y_2018	1.34667	PP2C
S4H2	Hap4	QP-289	Y_2018	NA	PP2C
S4G2	Hap4	QP-290	Y_2018	1.37388	PP2C
S4G3	Hap4	QP-298	Y_2018	NA	PP2C
S4F3	Hap4	QP-299	Y_2018	0.986667	PP2C
S4D3	Hap4	QP-301	Y_2018	NA	PP2C
S4C3	Hap4	QP-302	Y_2018	1.65885	PP2C
S4H4	Hap4	QP-305	Y_2018	1.46667	PP2C
S3C2	Hap4	QP-311	Y_2018	NA	PP2C
S4B4	Hap4	QP-316	Y_2018	NA	PP2C
S4H5	Hap4	QP-318	Y_2018	NA	PP2C
S4G5	Hap4	QP-319	Y_2018	1.8023	PP2C
S4A5	Hap4	QP-325	Y_2018	1.57333	PP2C
S4E7	Hap4	QP-327	Y_2018	1.46	PP2C
S4H6	Hap4	QP-329	Y_2018	1.33333	PP2C
S4F6	Hap4	QP-331	Y_2018	1.57225	PP2C
S4D6	Hap4	QP-333	Y_2018	1.46388	PP2C
10183	Hap4	QP-345	Y_2018	1.47333	PP2C
S1G1	Hap5	QP-001	Y_2018	2.36	PP2C
S1B1	Hap5	QP-006	Y_2018	3.31333	PP2C
S1G3	Hap5	QP-016	Y_2018	1.94	PP2C
S1B3	Hap5	QP-021	Y_2018	1.54667	PP2C
S1D4	Hap5	QP-027	Y_2018	1.47333	PP2C
S1H6	Hap5	QP-039	Y_2018	1.61333	PP2C
S1B8	Hap5	QP-060	Y_2018	2.91333	PP2C
S1A8	Hap5	QP-061	Y_2018	2.52	PP2C
S1H9	Hap5	QP-062	Y_2018	1.59333	PP2C
S1F9	Hap5	QP-064	Y_2018	1.58	PP2C
S1C9	Hap5	QP-066	Y_2018	2.15333	PP2C
S1A9	Hap5	QP-068	Y_2018	1.68667	PP2C
S4A7	Hap5	QP-084	Y_2018	2.24667	PP2C
S4G8	Hap5	QP-086	Y_2018	2.55333	PP2C
S4F8	Hap5	QP-087	Y_2018	2.15333	PP2C
S4C8	Hap5	QP-090	Y_2018	2.28	PP2C
S2D1	Hap5	QP-098	Y_2018	1.42667	PP2C
S2C3	Hap5	QP-114	Y_2018	1.98	PP2C
S2D5	Hap5	QP-128	Y_2018	1.75333	PP2C
S2A7	Hap5	QP-147	Y_2018	2.07727	PP2C
S4F11	Hap5	QP-180	Y_2018	1.73333	PP2C
S4H9	Hap5	QP-181	Y_2018	2.42667	PP2C
S4D9	Hap5	QP-185	Y_2018	1.92	PP2C
S3F1	Hap5	QP-191	Y_2018	1.74667	PP2C
S3H4	Hap5	QP-209	Y_2018	0.932249	PP2C
S3G4	Hap5	QP-210	Y_2018	1.08667	PP2C
S1B5	Hap1	QP-037	Y_2019	2.01333	PP2C
S2H2	Hap1	QP-102	Y_2019	2.02667	PP2C
S2H4	Hap1	QP-117	Y_2019	2.00667	PP2C
S2B8	Hap1	QP-154	Y_2019	1.96667	PP2C
10178	Hap1	QP-164	Y_2019	2.12667	PP2C
S2E10	Hap1	QP-167	Y_2019	1.29333	PP2C
S2A10	Hap1	QP-171	Y_2019	2.09333	PP2C
S3C5	Hap1	QP-222	Y_2019	1.44	PP2C
S3B6	Hap1	QP-231	Y_2019	2.5	PP2C
S3C7	Hap1	QP-238	Y_2019	1.35333	PP2C
S3G8	Hap1	QP-242	Y_2019	1.52667	PP2C
S3D10	Hap1	QP-261	Y_2019	1.72	PP2C
10176	Hap1	QP-276	Y_2019	1.52	PP2C
S4B2	Hap1	QP-295	Y_2019	1.61111	PP2C
S4A3	Hap1	QP-304	Y_2019	0.806667	PP2C
S4B5	Hap1	QP-324	Y_2019	2.27333	PP2C
S4E6	Hap1	QP-332	Y_2019	2.30667	PP2C
S2G5	Hap2	QP-125	Y_2019	1.56667	PP2C
S2A8	Hap2	QP-155	Y_2019	1.86	PP2C
S3E10	Hap2	QP-260	Y_2019	1.02	PP2C
S4F5	Hap2	QP-320	Y_2019	1.87333	PP2C
S1F1	Hap3	QP-002	Y_2019	2.72111	PP2C
S1E1	Hap3	QP-003	Y_2019	2.33333	PP2C
S1D1	Hap3	QP-004	Y_2019	2.82667	PP2C
S1F3	Hap3	QP-017	Y_2019	2.03333	PP2C
S1E3	Hap3	QP-018	Y_2019	2.92	PP2C
S1D3	Hap3	QP-019	Y_2019	2.62	PP2C
S1E4	Hap3	QP-026	Y_2019	2.83333	PP2C
S1D5	Hap3	QP-035	Y_2019	2.32	PP2C
S1F6	Hap3	QP-041	Y_2019	2.52	PP2C
S1E6	Hap3	QP-042	Y_2019	2.88	PP2C
S1D6	Hap3	QP-043	Y_2019	3.42	PP2C
S1B6	Hap3	QP-045	Y_2019	2.30667	PP2C
S1A6	Hap3	QP-046	Y_2019	3.17333	PP2C
S1H7	Hap3	QP-047	Y_2019	NA	PP2C
S1F7	Hap3	QP-049	Y_2019	2.68	PP2C
S1H8	Hap3	QP-054	Y_2019	2.04	PP2C
S1D8	Hap3	QP-058	Y_2019	1.82667	PP2C
S1C8	Hap3	QP-059	Y_2019	2.25333	PP2C
S1G9	Hap3	QP-063	Y_2019	2.60667	PP2C
S1E9	Hap3	QP-065	Y_2019	2.84667	PP2C
S1F11	Hap3	QP-079	Y_2019	2.2	PP2C
S1D11	Hap3	QP-081	Y_2019	2.2	PP2C
S4E8	Hap3	QP-088	Y_2019	1.66667	PP2C
S4A8	Hap3	QP-092	Y_2019	1.80667	PP2C
S2F1	Hap3	QP-096	Y_2019	2.89333	PP2C
S2B2	Hap3	QP-107	Y_2019	1.75111	PP2C
S2D3	Hap3	QP-113	Y_2019	3.08111	PP2C
S2G4	Hap3	QP-118	Y_2019	1.96667	PP2C
S2D4	Hap3	QP-120	Y_2019	1.76	PP2C
S2F5	Hap3	QP-126	Y_2019	2.41333	PP2C
S2G6	Hap3	QP-133	Y_2019	2.48667	PP2C
S2A6	Hap3	QP-139	Y_2019	2.79333	PP2C
S2H7	Hap3	QP-140	Y_2019	2.24667	PP2C
S2H9	Hap3	QP-156	Y_2019	1.38	PP2C
S2C10	Hap3	QP-169	Y_2019	3.25333	PP2C
S2F11	Hap3	QP-175	Y_2019	3.16	PP2C
S2D11	Hap3	QP-177	Y_2019	1.75333	PP2C
S4H11	Hap3	QP-178	Y_2019	2.02	PP2C
S4B6	Hap3	QP-179	Y_2019	2.84	PP2C
S4B9	Hap3	QP-187	Y_2019	1.84	PP2C
S3E1	Hap3	QP-192	Y_2019	1.78	PP2C
S3C1	Hap3	QP-194	Y_2019	2.21333	PP2C
S3C4	Hap3	QP-214	Y_2019	1.54	PP2C
S3E5	Hap3	QP-220	Y_2019	2.46	PP2C
S3A6	Hap3	QP-232	Y_2019	2.67333	PP2C
S3B8	Hap3	QP-247	Y_2019	1.92667	PP2C
S3H9	Hap3	QP-249	Y_2019	1.72667	PP2C
S3B9	Hap3	QP-255	Y_2019	1.49333	PP2C
S3A9	Hap3	QP-256	Y_2019	1.90667	PP2C
S3E11	Hap3	QP-268	Y_2019	1.38667	PP2C
S4G10	Hap3	QP-274	Y_2019	1.96667	PP2C
S4F10	Hap3	QP-275	Y_2019	1.65333	PP2C
S4B10	Hap3	QP-279	Y_2019	1.62667	PP2C
S4A10	Hap3	QP-280	Y_2019	1.81333	PP2C
S4F1	Hap3	QP-283	Y_2019	2.3	PP2C
S4H3	Hap3	QP-297	Y_2019	2.46	PP2C
S4E4	Hap3	QP-308	Y_2019	1.84667	PP2C
S1F2	Hap4	QP-010	Y_2019	1.38667	PP2C
S1C2	Hap4	QP-013	Y_2019	1.29333	PP2C
S1H3	Hap4	QP-015	Y_2019	1.32	PP2C
S1C3	Hap4	QP-020	Y_2019	0.94	PP2C
S1A3	Hap4	QP-022	Y_2019	1.44	PP2C
S1H4	Hap4	QP-023	Y_2019	1.27333	PP2C
S1G4	Hap4	QP-024	Y_2019	1.29333	PP2C
S1C4	Hap4	QP-028	Y_2019	1.37333	PP2C
S1B4	Hap4	QP-029	Y_2019	1.16	PP2C
S1C7	Hap4	QP-052	Y_2019	1.06	PP2C
S1E8	Hap4	QP-057	Y_2019	1.50667	PP2C
S1H10	Hap4	QP-069	Y_2019	1.49333	PP2C
S1G10	Hap4	QP-070	Y_2019	1.5	PP2C
S1F10	Hap4	QP-071	Y_2019	1.28	PP2C
S1C10	Hap4	QP-074	Y_2019	1.34667	PP2C
S1A10	Hap4	QP-076	Y_2019	1.49333	PP2C
S1H11	Hap4	QP-077	Y_2019	1.62	PP2C
S1E11	Hap4	QP-080	Y_2019	1.36667	PP2C
S2F2	Hap4	QP-104	Y_2019	2.04	PP2C
S2C2	Hap4	QP-106	Y_2019	1.89333	PP2C
S2B4	Hap4	QP-122	Y_2019	1.71333	PP2C
S2C5	Hap4	QP-129	Y_2019	1.36667	PP2C
S2B5	Hap4	QP-130	Y_2019	1.62667	PP2C
S2A5	Hap4	QP-131	Y_2019	1.63333	PP2C
S2B6	Hap4	QP-138	Y_2019	1.78667	PP2C
S2F7	Hap4	QP-142	Y_2019	1.67333	PP2C
S2C7	Hap4	QP-145	Y_2019	1.34	PP2C
S2G8	Hap4	QP-149	Y_2019	1.33333	PP2C
S2D8	Hap4	QP-152	Y_2019	1.44	PP2C
S2C9	Hap4	QP-161	Y_2019	1.8	PP2C
S2A9	Hap4	QP-163	Y_2019	1.38	PP2C
S2F10	Hap4	QP-166	Y_2019	1.37333	PP2C
S2D10	Hap4	QP-168	Y_2019	1.56	PP2C
S2B10	Hap4	QP-170	Y_2019	1.46	PP2C
S4G9	Hap4	QP-182	Y_2019	1.42	PP2C
S4A9	Hap4	QP-188	Y_2019	1.39333	PP2C
S3D1	Hap4	QP-193	Y_2019	1.75333	PP2C
S3F2	Hap4	QP-199	Y_2019	2.08	PP2C
S3G3	Hap4	QP-202	Y_2019	1.00667	PP2C
S3E3	Hap4	QP-204	Y_2019	NA	PP2C
S3B3	Hap4	QP-207	Y_2019	1.42667	PP2C
S3A3	Hap4	QP-208	Y_2019	1.44	PP2C
S3F4	Hap4	QP-211	Y_2019	1.89333	PP2C
S3B4	Hap4	QP-215	Y_2019	1.68667	PP2C
S3A4	Hap4	QP-216	Y_2019	1.90667	PP2C
S3G5	Hap4	QP-218	Y_2019	1.36	PP2C
S3F5	Hap4	QP-219	Y_2019	1.62667	PP2C
S3F6	Hap4	QP-227	Y_2019	1.23333	PP2C
S3D6	Hap4	QP-229	Y_2019	2.35333	PP2C
S3D7	Hap4	QP-237	Y_2019	1.54667	PP2C
S3H8	Hap4	QP-241	Y_2019	1.31333	PP2C
S3F8	Hap4	QP-243	Y_2019	1.40667	PP2C
S3E8	Hap4	QP-244	Y_2019	1.08	PP2C
S3D8	Hap4	QP-245	Y_2019	1.38	PP2C
S3A8	Hap4	QP-248	Y_2019	2.15333	PP2C
S3E9	Hap4	QP-252	Y_2019	1.33333	PP2C
S3D9	Hap4	QP-253	Y_2019	1.26667	PP2C
S3H10	Hap4	QP-257	Y_2019	1.75333	PP2C
S3C10	Hap4	QP-262	Y_2019	1.82667	PP2C
S3A10	Hap4	QP-264	Y_2019	1.49778	PP2C
S3D11	Hap4	QP-269	Y_2019	2.1	PP2C
S4E11	Hap4	QP-270	Y_2019	1.36667	PP2C
S4D11	Hap4	QP-271	Y_2019	1.56	PP2C
S4B1	Hap4	QP-287	Y_2019	1.45333	PP2C
S4A1	Hap4	QP-288	Y_2019	1.54667	PP2C
S4H2	Hap4	QP-289	Y_2019	2.04667	PP2C
S4G2	Hap4	QP-290	Y_2019	1.41333	PP2C
S4G3	Hap4	QP-298	Y_2019	1.07628	PP2C
S4F3	Hap4	QP-299	Y_2019	1.20667	PP2C
S4D3	Hap4	QP-301	Y_2019	NA	PP2C
S4C3	Hap4	QP-302	Y_2019	1.55333	PP2C
S4H4	Hap4	QP-305	Y_2019	1.73333	PP2C
S3C2	Hap4	QP-311	Y_2019	1.53111	PP2C
S4B4	Hap4	QP-316	Y_2019	1.48	PP2C
S4H5	Hap4	QP-318	Y_2019	1.89628	PP2C
S4G5	Hap4	QP-319	Y_2019	1.82111	PP2C
S4A5	Hap4	QP-325	Y_2019	1.76	PP2C
S4E7	Hap4	QP-327	Y_2019	1.41333	PP2C
S4H6	Hap4	QP-329	Y_2019	1.29333	PP2C
S4F6	Hap4	QP-331	Y_2019	1.48667	PP2C
S4D6	Hap4	QP-333	Y_2019	1.33333	PP2C
10183	Hap4	QP-345	Y_2019	1.46667	PP2C
S1G1	Hap5	QP-001	Y_2019	2.51333	PP2C
S1B1	Hap5	QP-006	Y_2019	3.34667	PP2C
S1G3	Hap5	QP-016	Y_2019	1.97111	PP2C
S1B3	Hap5	QP-021	Y_2019	1.92	PP2C
S1D4	Hap5	QP-027	Y_2019	1.58667	PP2C
S1H6	Hap5	QP-039	Y_2019	1.84	PP2C
S1B8	Hap5	QP-060	Y_2019	2.97333	PP2C
S1A8	Hap5	QP-061	Y_2019	2.5	PP2C
S1H9	Hap5	QP-062	Y_2019	1.72111	PP2C
S1F9	Hap5	QP-064	Y_2019	1.7	PP2C
S1C9	Hap5	QP-066	Y_2019	2.12667	PP2C
S1A9	Hap5	QP-068	Y_2019	1.68	PP2C
S4A7	Hap5	QP-084	Y_2019	2.44	PP2C
S4G8	Hap5	QP-086	Y_2019	2.27333	PP2C
S4F8	Hap5	QP-087	Y_2019	2.34667	PP2C
S4C8	Hap5	QP-090	Y_2019	2.03333	PP2C
S2D1	Hap5	QP-098	Y_2019	1.68667	PP2C
S2C3	Hap5	QP-114	Y_2019	1.59333	PP2C
S2D5	Hap5	QP-128	Y_2019	1.59333	PP2C
S2A7	Hap5	QP-147	Y_2019	2.27333	PP2C
S4F11	Hap5	QP-180	Y_2019	2.04	PP2C
S4H9	Hap5	QP-181	Y_2019	2.48667	PP2C
S4D9	Hap5	QP-185	Y_2019	2.14667	PP2C
S3F1	Hap5	QP-191	Y_2019	1.83333	PP2C
S3H4	Hap5	QP-209	Y_2019	1.4	PP2C
S3G4	Hap5	QP-210	Y_2019	1.43333	PP2C
