# Supplementary material for: Genome-wide association study in quinoa reveals selection pattern typical for crops with a short breeding history
Source: eLife journal article supplement (doi:10.7554/elife.66873), 2022-07-08
Supplement: supp [file elife-66873-supp-v1.zip]

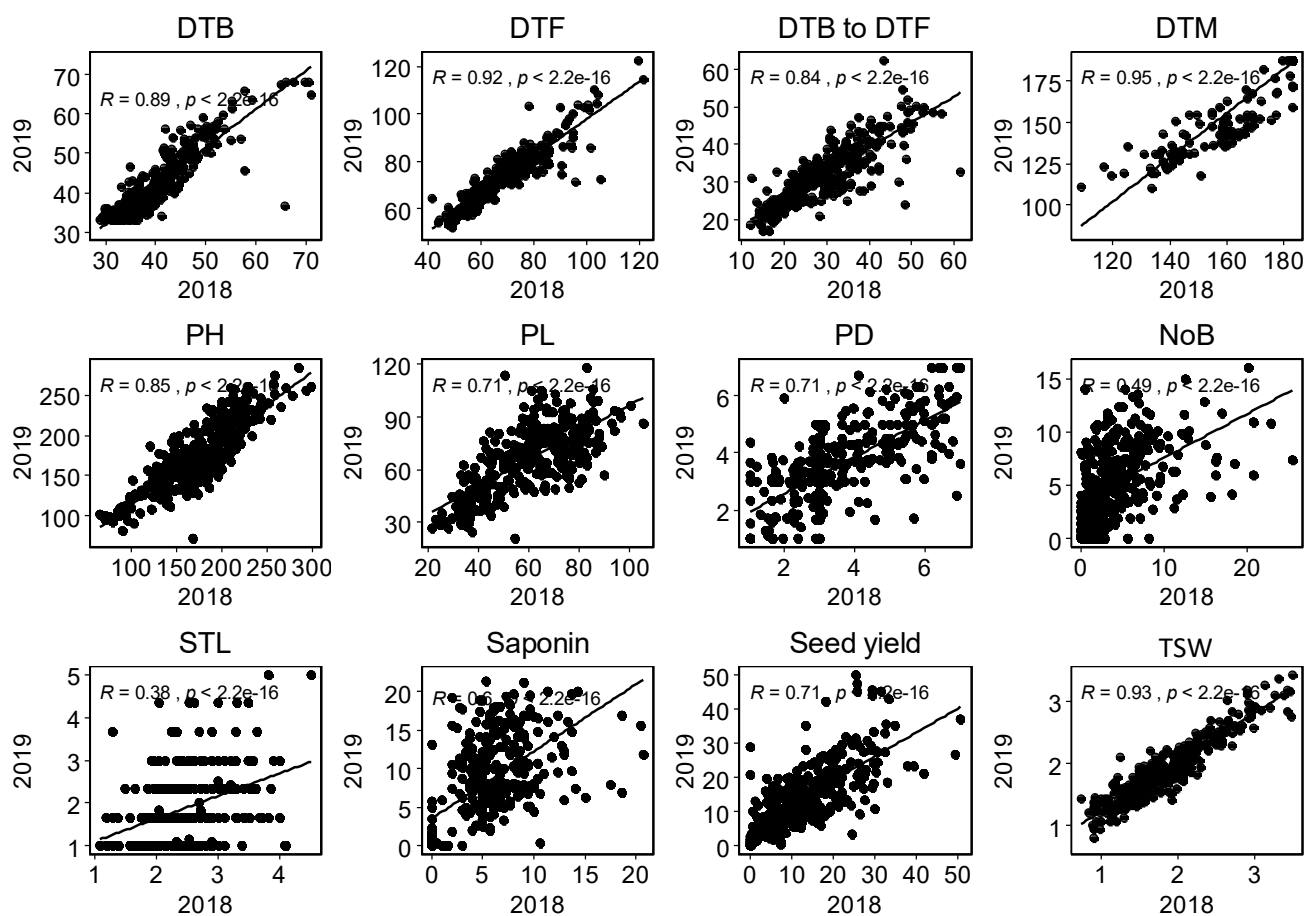

**Figure 3-figure supplement 2:** Graphical presentation of correlations between years among 12 traits. Pearson correlation value (R) with P-values are shown. DTB: days to bolting (inflorescence emergence), DTF: days to flowering, DTB to DTF: days between bolting and flowering, DTM: days to maturity, PH: plant height (cm), PL: panicle length (cm), PD: panicle density (cm), NoB: Number of branches, STL: stem lying, Saponin: saponin content as foam height (mm), Seed yield: seed yield per plant (g), TSW: thousand seed weight (g).
