# Supplementary material for: Genome-wide association study in quinoa reveals selection pattern typical for crops with a short breeding history
Source: eLife journal article supplement (doi:10.7554/elife.66873), 2022-07-08
Supplement: supp [file elife-66873-supp-v1.zip]

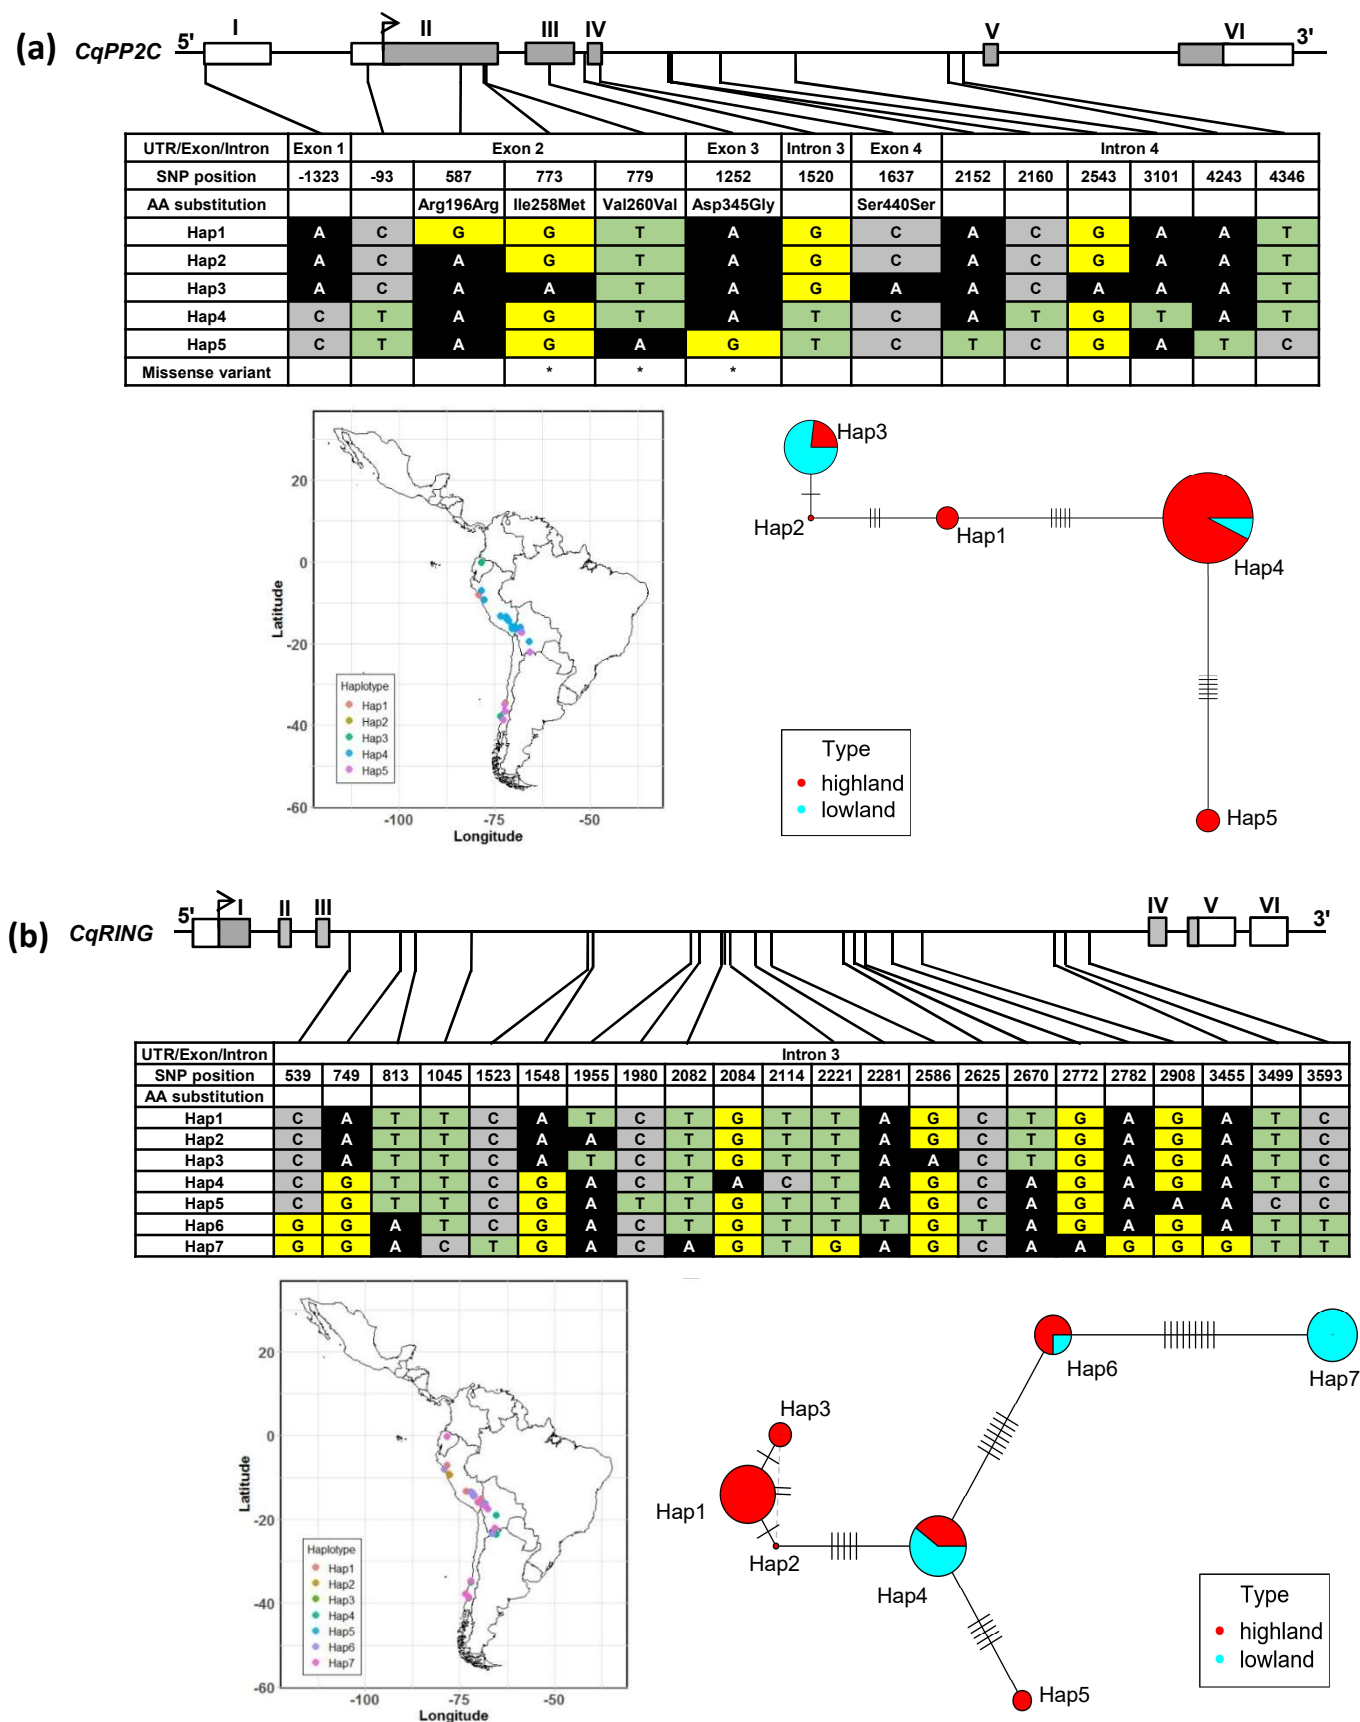

**Figure 4-figure supplement 2:** Haplotypes of two genes, *CqPP2C* (a) and *CqRING* (b) associated with seed size in quinoa. The geographic origin of the accessions and haplotype networks are displayed below the gene structure. The frequency of haplotypes is correspondent to the circle size. The color of the pie chart depicts the population. Crosslines represent the number of nucleotide polymorphisms between haplotypes.
