# Supplementary material for: Genome-wide association study in quinoa reveals selection pattern typical for crops with a short breeding history
Source: eLife journal article supplement (doi:10.7554/elife.66873), 2022-07-08
Supplement: supp [file elife-66873-supp-v1.zip]

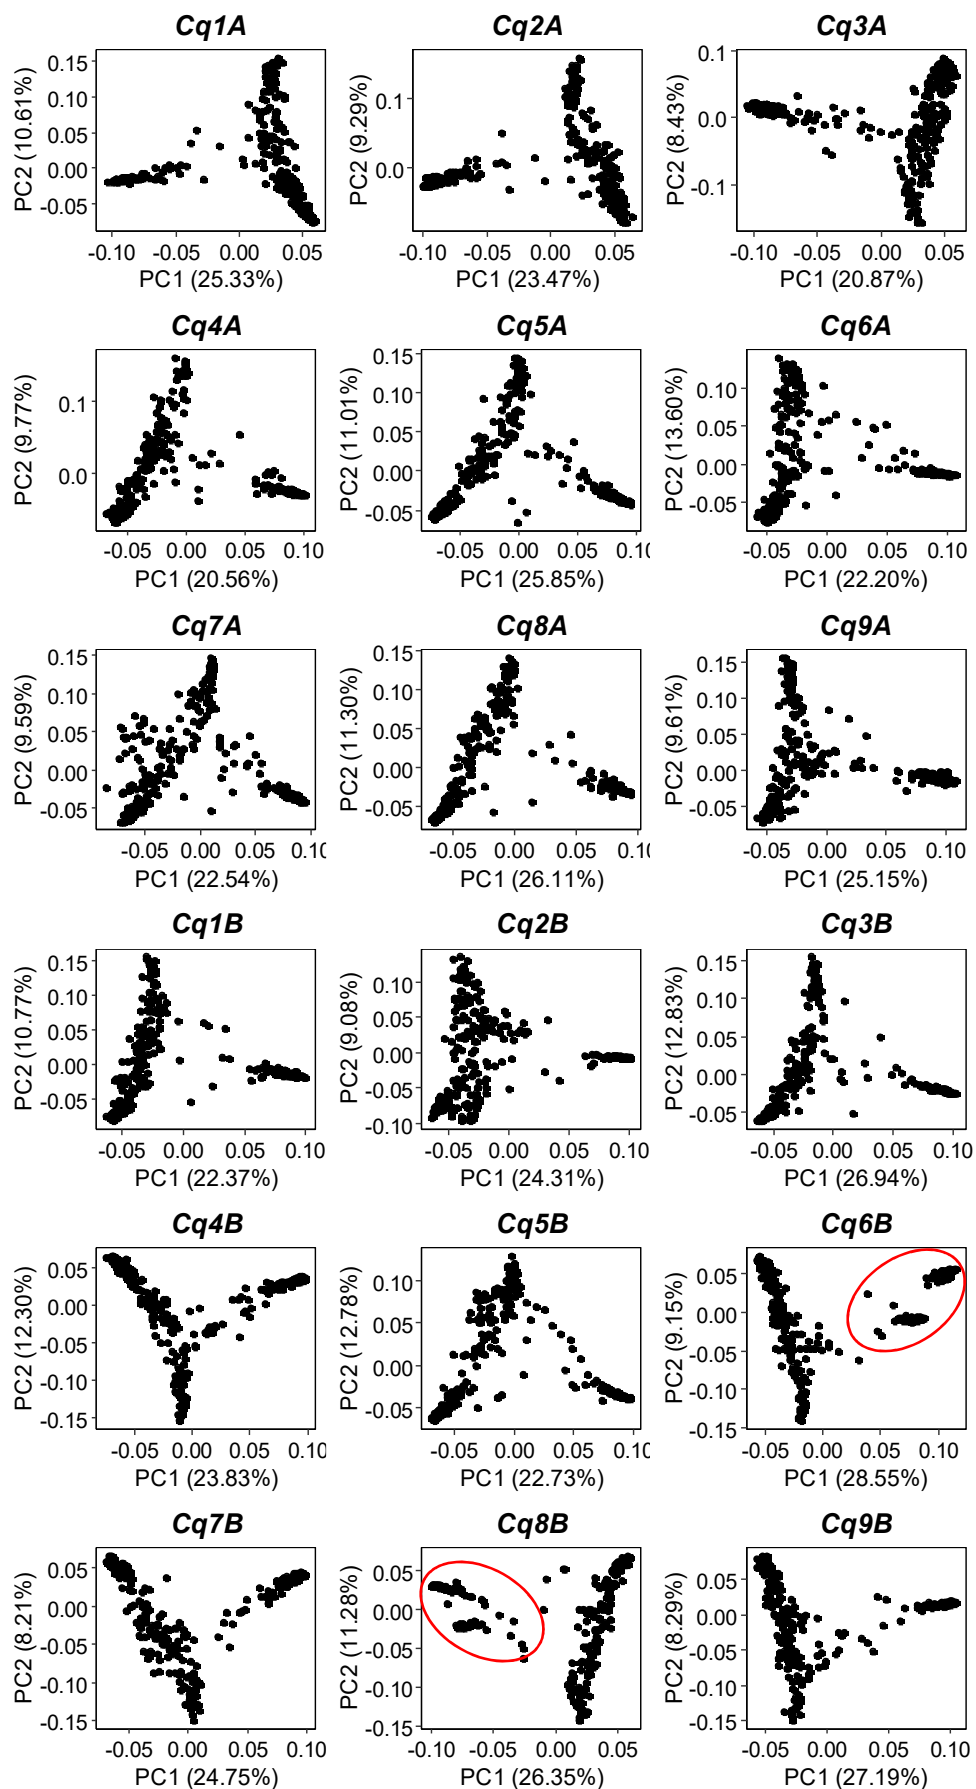

**Figure 1-figure supplement 5:** SNP-based PCA across all 18 quinoa chromosomes. Red circles depict the two clusters of Lowland accessions.
