# Supplementary material for: Genome-wide association study in quinoa reveals selection pattern typical for crops with a short breeding history
Source: eLife journal article supplement (doi:10.7554/elife.66873), 2022-07-08
Supplement: supp [file elife-66873-supp-v1.zip]

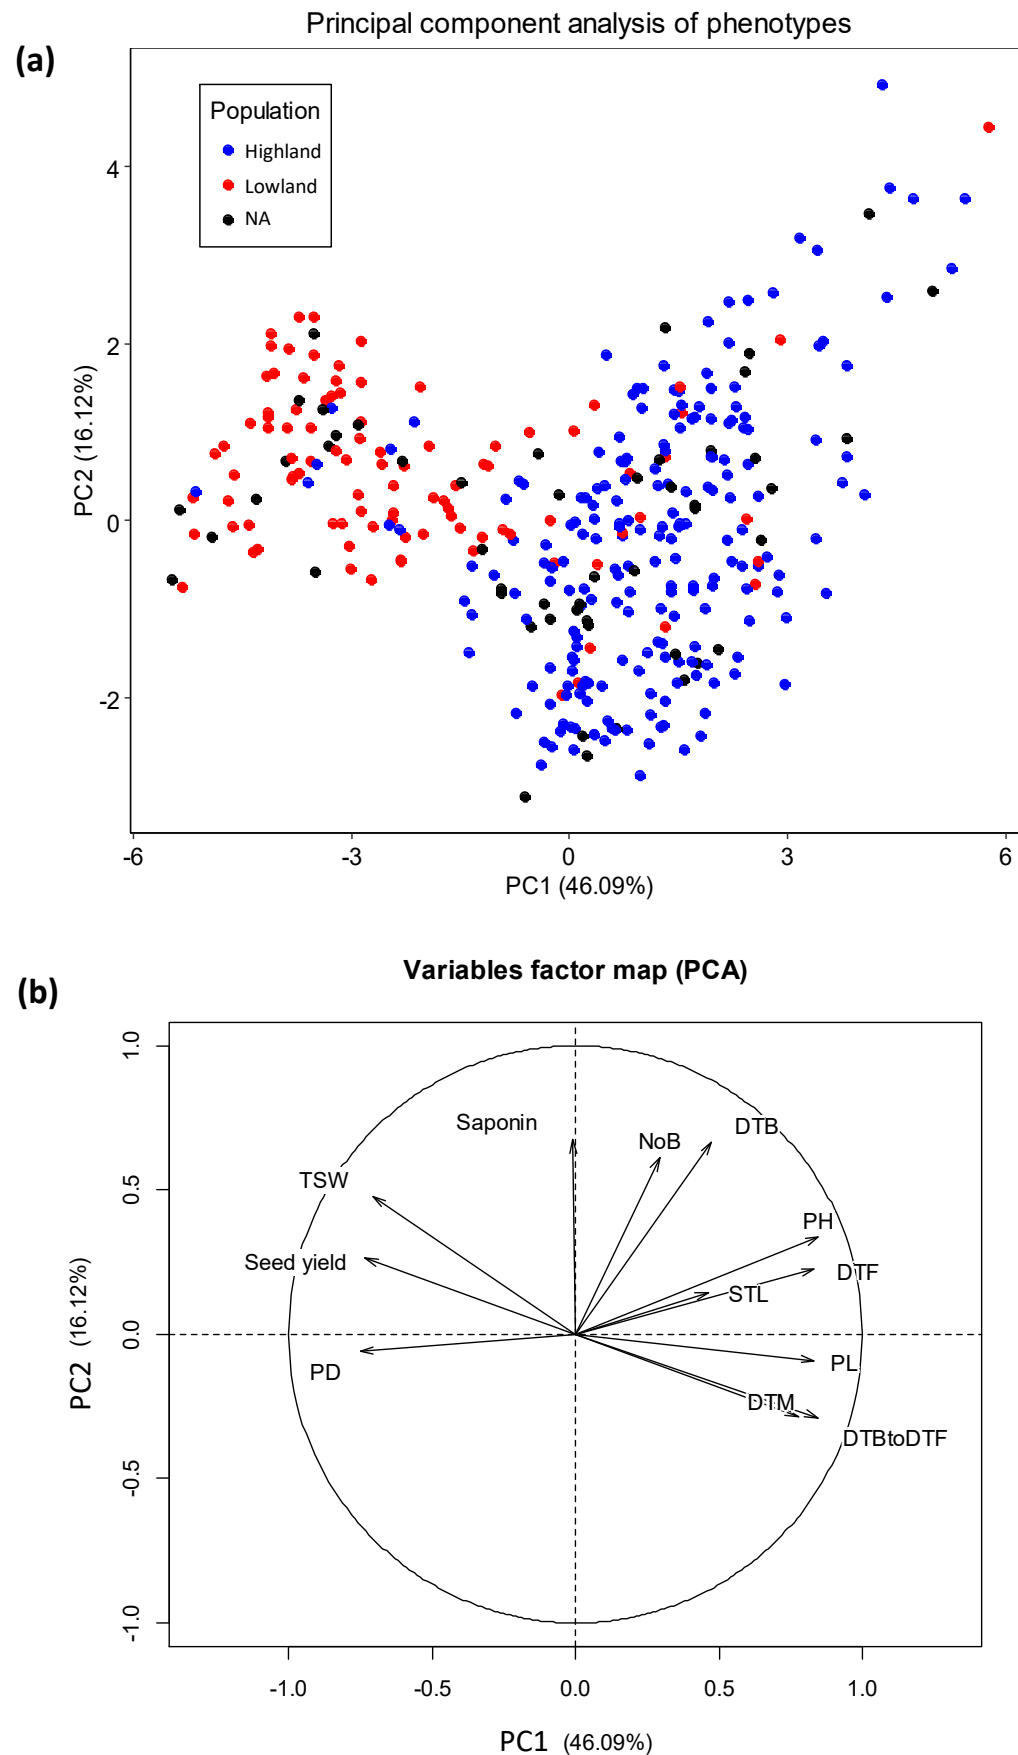

**Figure 3-figure supplement 4:** PCA of 12 quantitative phenotypes. (a) Individual factor map colored according to populations identified from SNP analysis. (b) Variables factor map of the PCA.
