# Supplementary material for: Genome-wide association study in quinoa reveals selection pattern typical for crops with a short breeding history
Source: eLife journal article supplement (doi:10.7554/elife.66873), 2022-07-08
Supplement: supp [file elife-66873-supp-v1.zip]

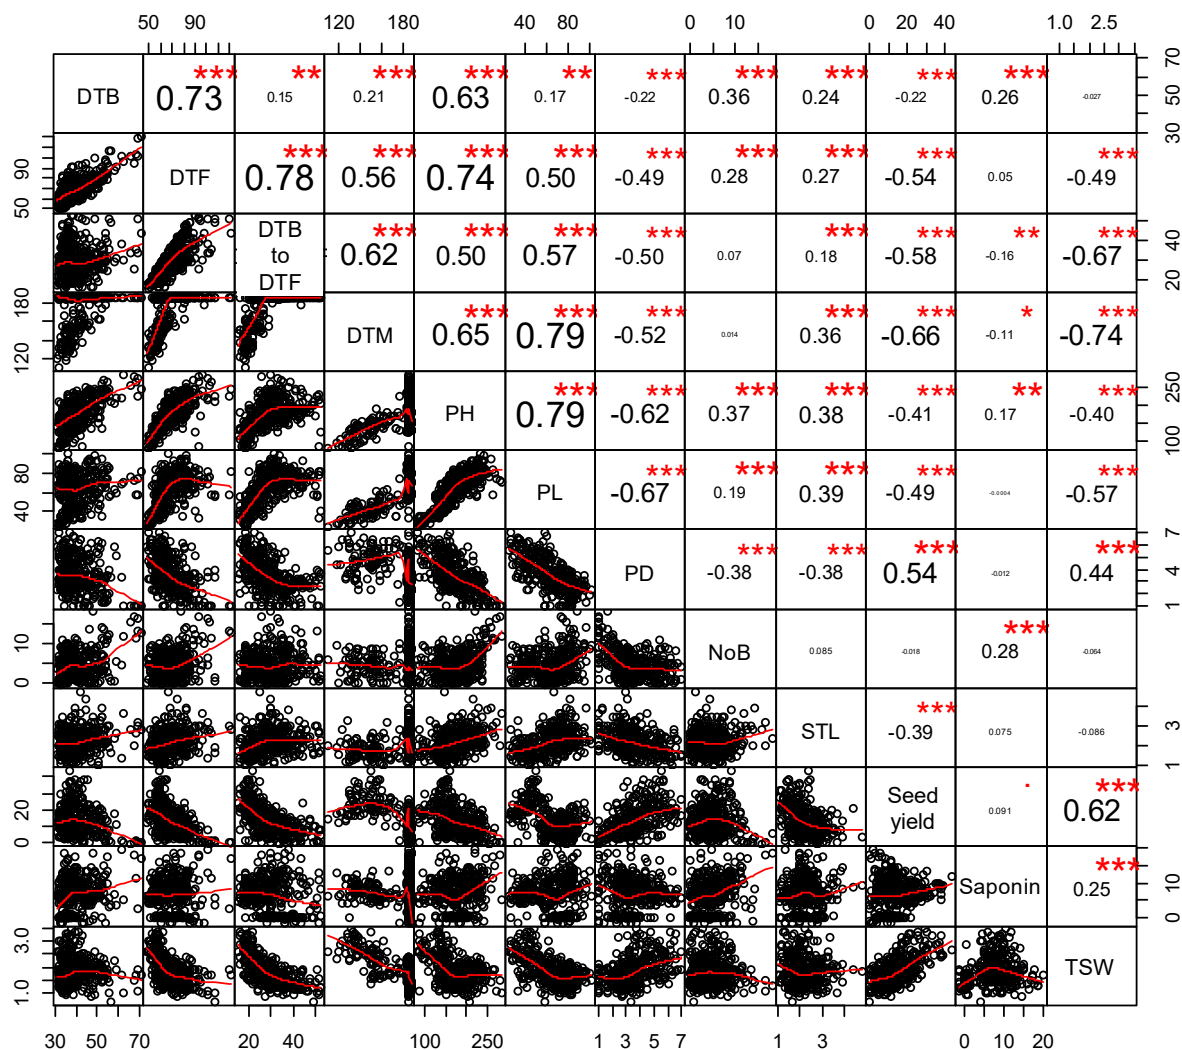

**Figure 3-figure supplement 3:** Pearson correlations among 12 quinoa traits. Best linear unbiased estimates across two years were used. Below the diagonal, scatter plots are shown with the fitted line in red. Above the diagonal, the Pearson correlation coefficients are shown with significance levels, \*\*\* =  $P < 0.001$ , \*\* =  $P < 0.01$ .
