# Supplementary material for: Genome-wide association study in quinoa reveals selection pattern typical for crops with a short breeding history
Source: eLife journal article supplement (doi:10.7554/elife.66873), 2022-07-08
Supplement: supp [file elife-66873-supp-v1.zip]

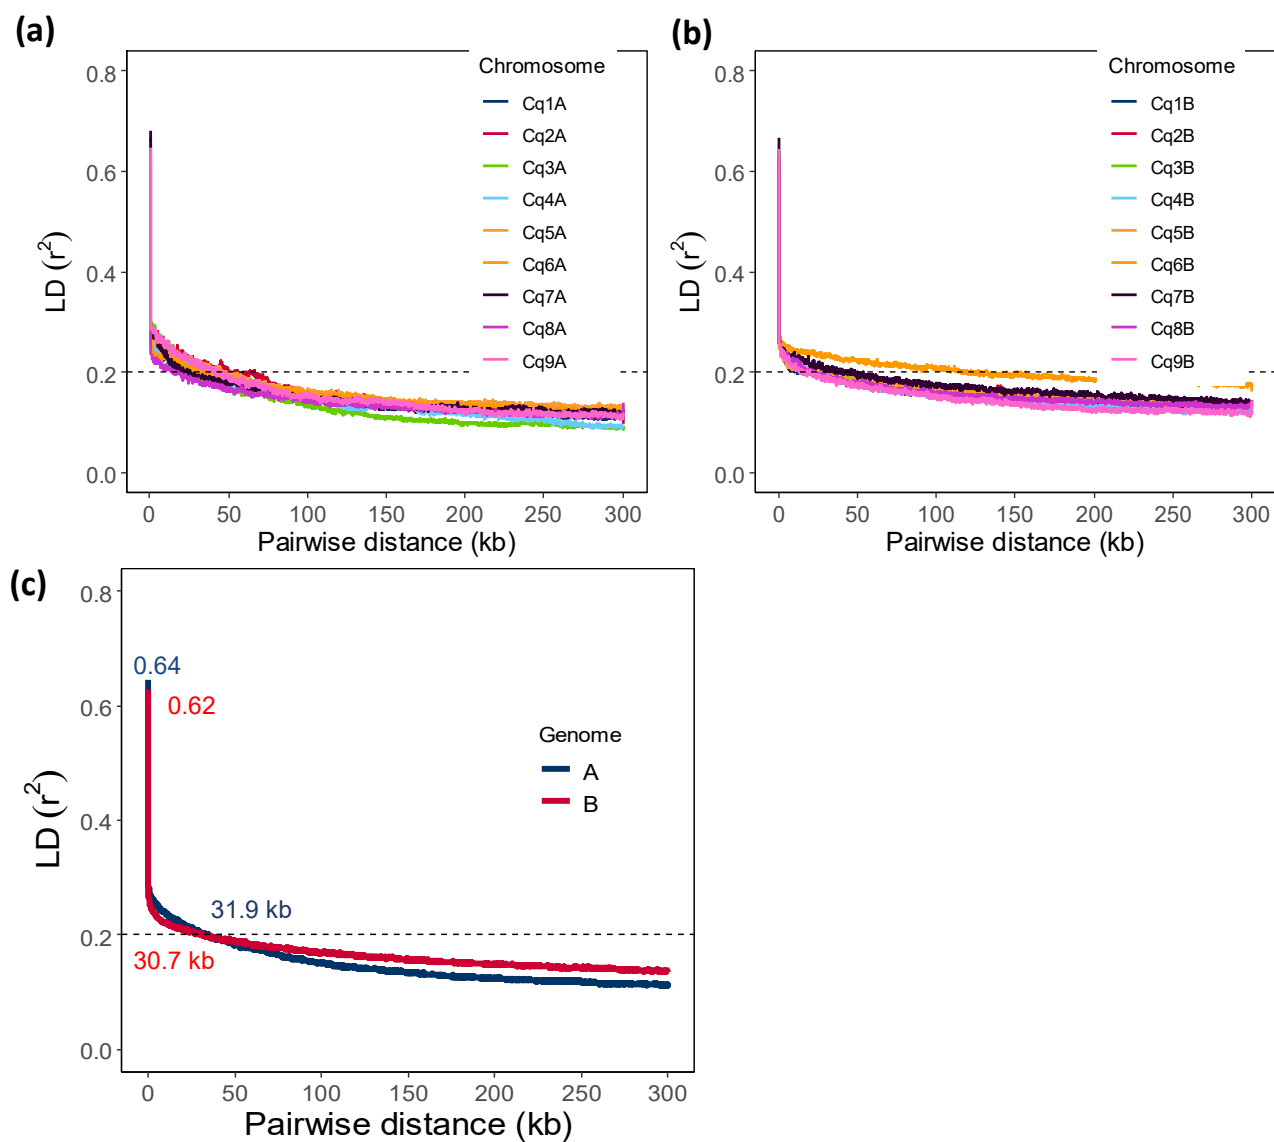

**Figure 1-figure supplement 4:** Chromosome-wide LD decay in genome A (a) and genome B (b). Colors depict different chromosomes. (c) Genome-wide average LD decay of the A sub-genome (blue) and B sub-genome (red). Pairwise distance at  $r^2 = 0.20$  is defined as the threshold for genome wide LD decay (dashed line).
