# Supplementary material for: Genome-wide association study in quinoa reveals selection pattern typical for crops with a short breeding history
Source: eLife journal article supplement (doi:10.7554/elife.66873), 2022-07-08
Supplement: supp [file elife-66873-supp-v1.zip]

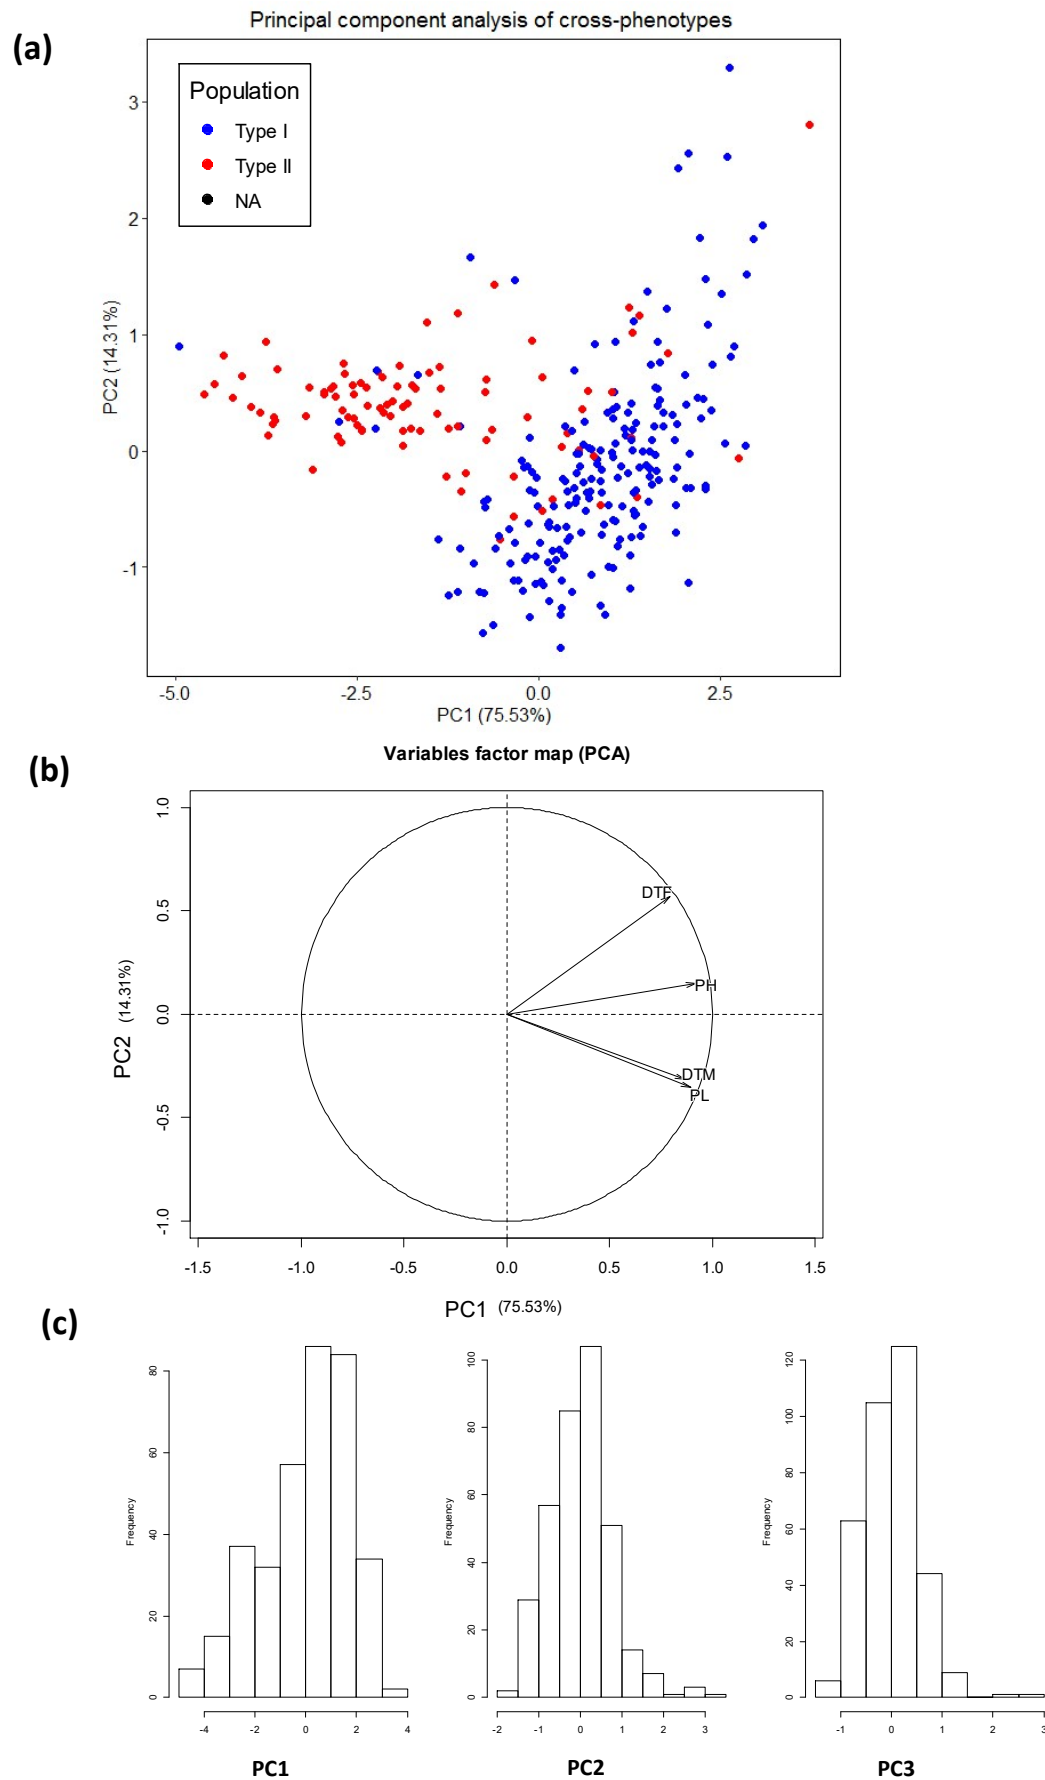

**Figure 3-figure supplement 7:** PCA of 4 quantitative traits (days to flowering , days to maturity, plant height, and panicle length). (a) Individual factor map, (b) variables factor map of the PCA, (c) distribution of the first three principal components used for GWAS analysis. Type I: Highland population, Type II: Lowland population.
