# Supplementary material for: Genome-wide association study in quinoa reveals selection pattern typical for crops with a short breeding history
Source: eLife journal article supplement (doi:10.7554/elife.66873), 2022-07-08
Supplement: supp [file elife-66873-supp-v1.zip]

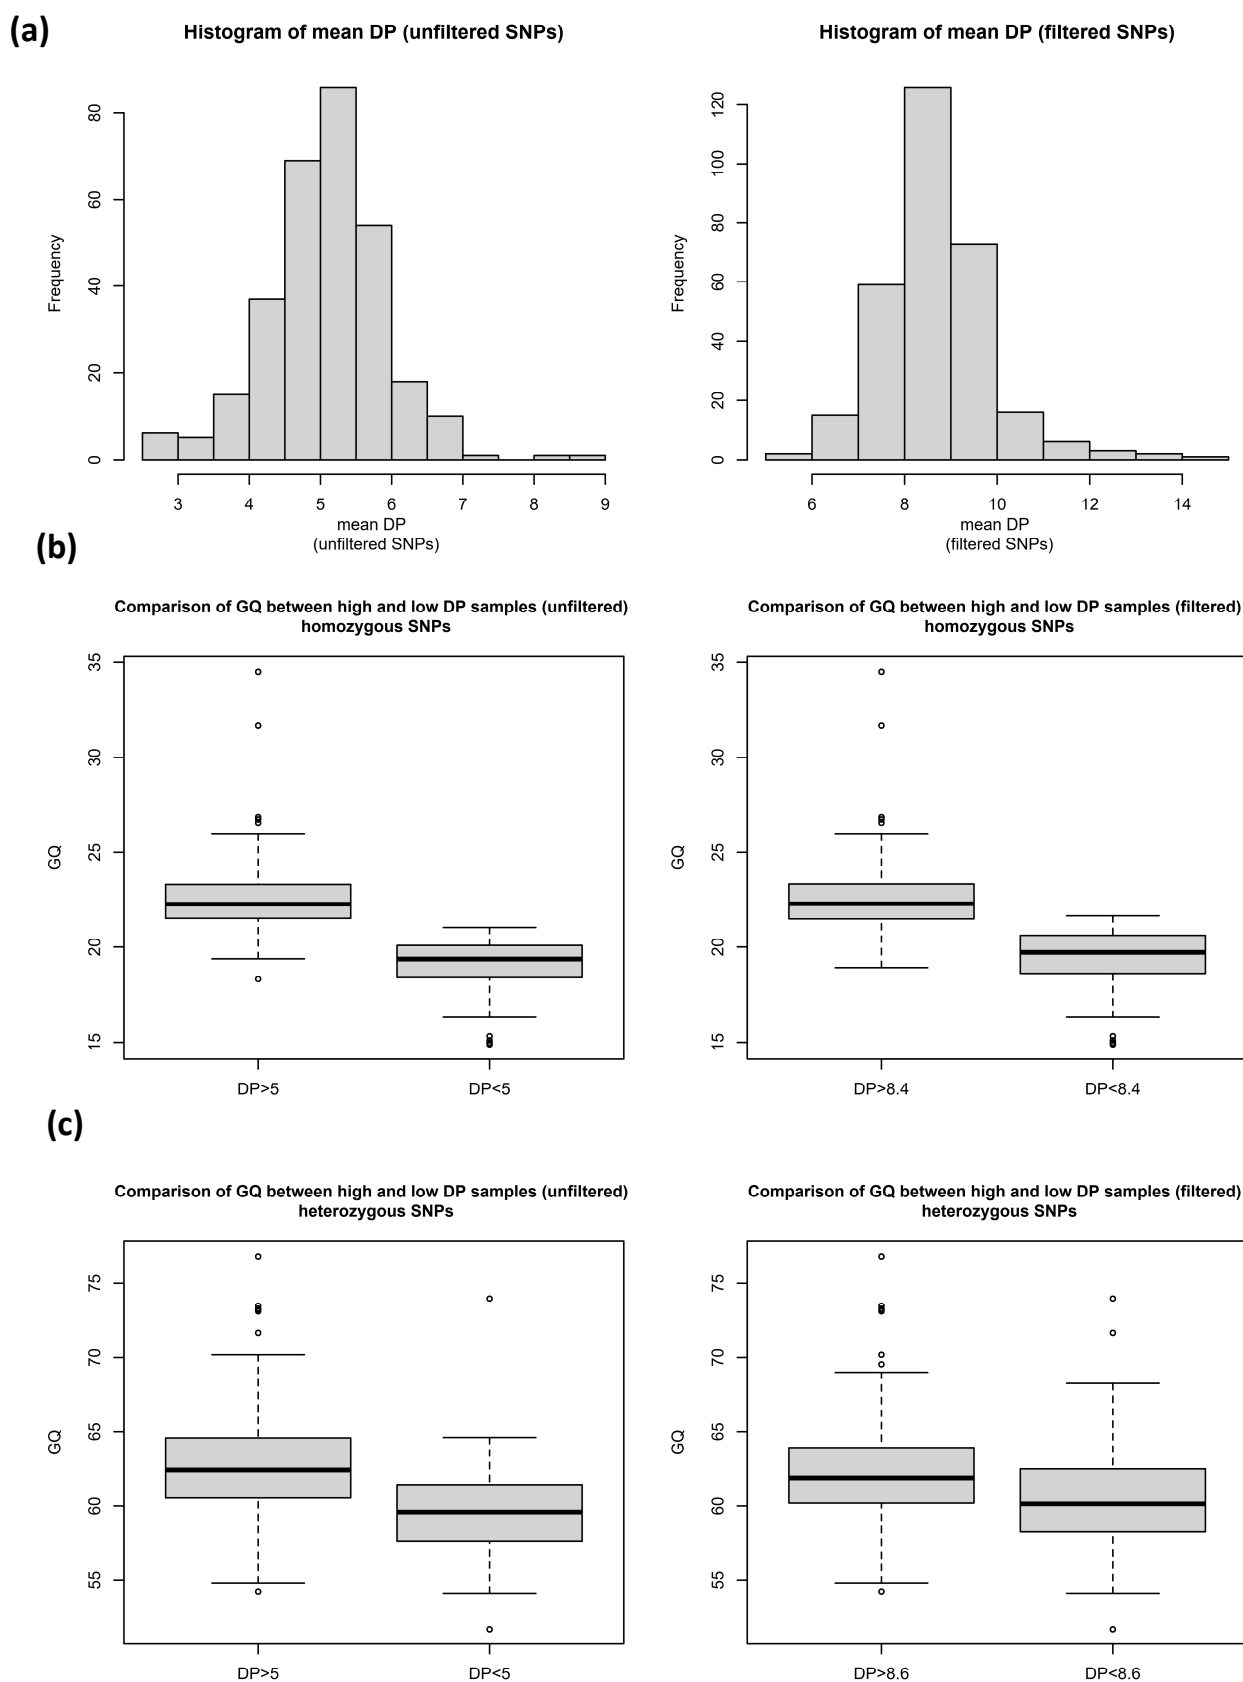

**Figure 1-figure supplement 3:** (a) Histograms of mean read depth (DP) for unfiltered and filtered SNPs, and the comparison of genotype quality (GQ) between high and low DP samples for (b) homozygous SNPs (filtered and unfiltered) and (c) heterozygous SNPs (filtered and unfiltered).
