# Supplementary material for: Genome-wide association study in quinoa reveals selection pattern typical for crops with a short breeding history
Source: eLife journal article supplement (doi:10.7554/elife.66873), 2022-07-08
Supplement: supp [file elife-66873-supp-v1.zip]

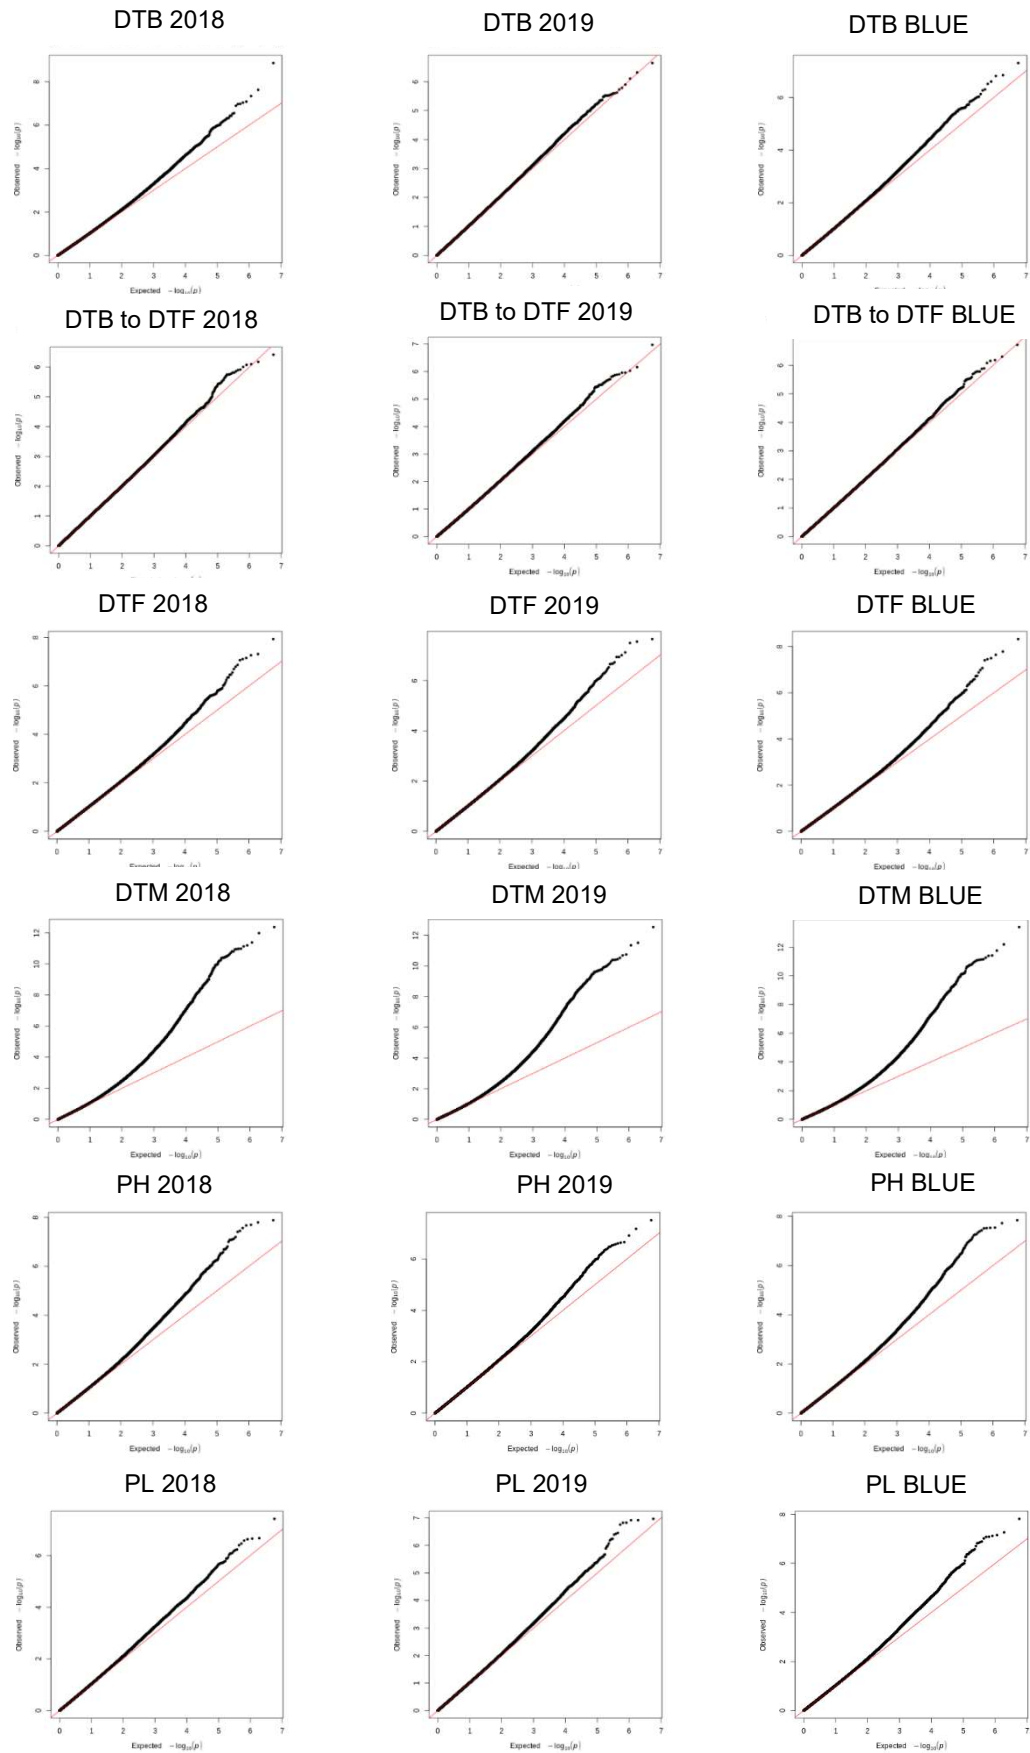

Figure 3-figure supplement 6: *cont.*

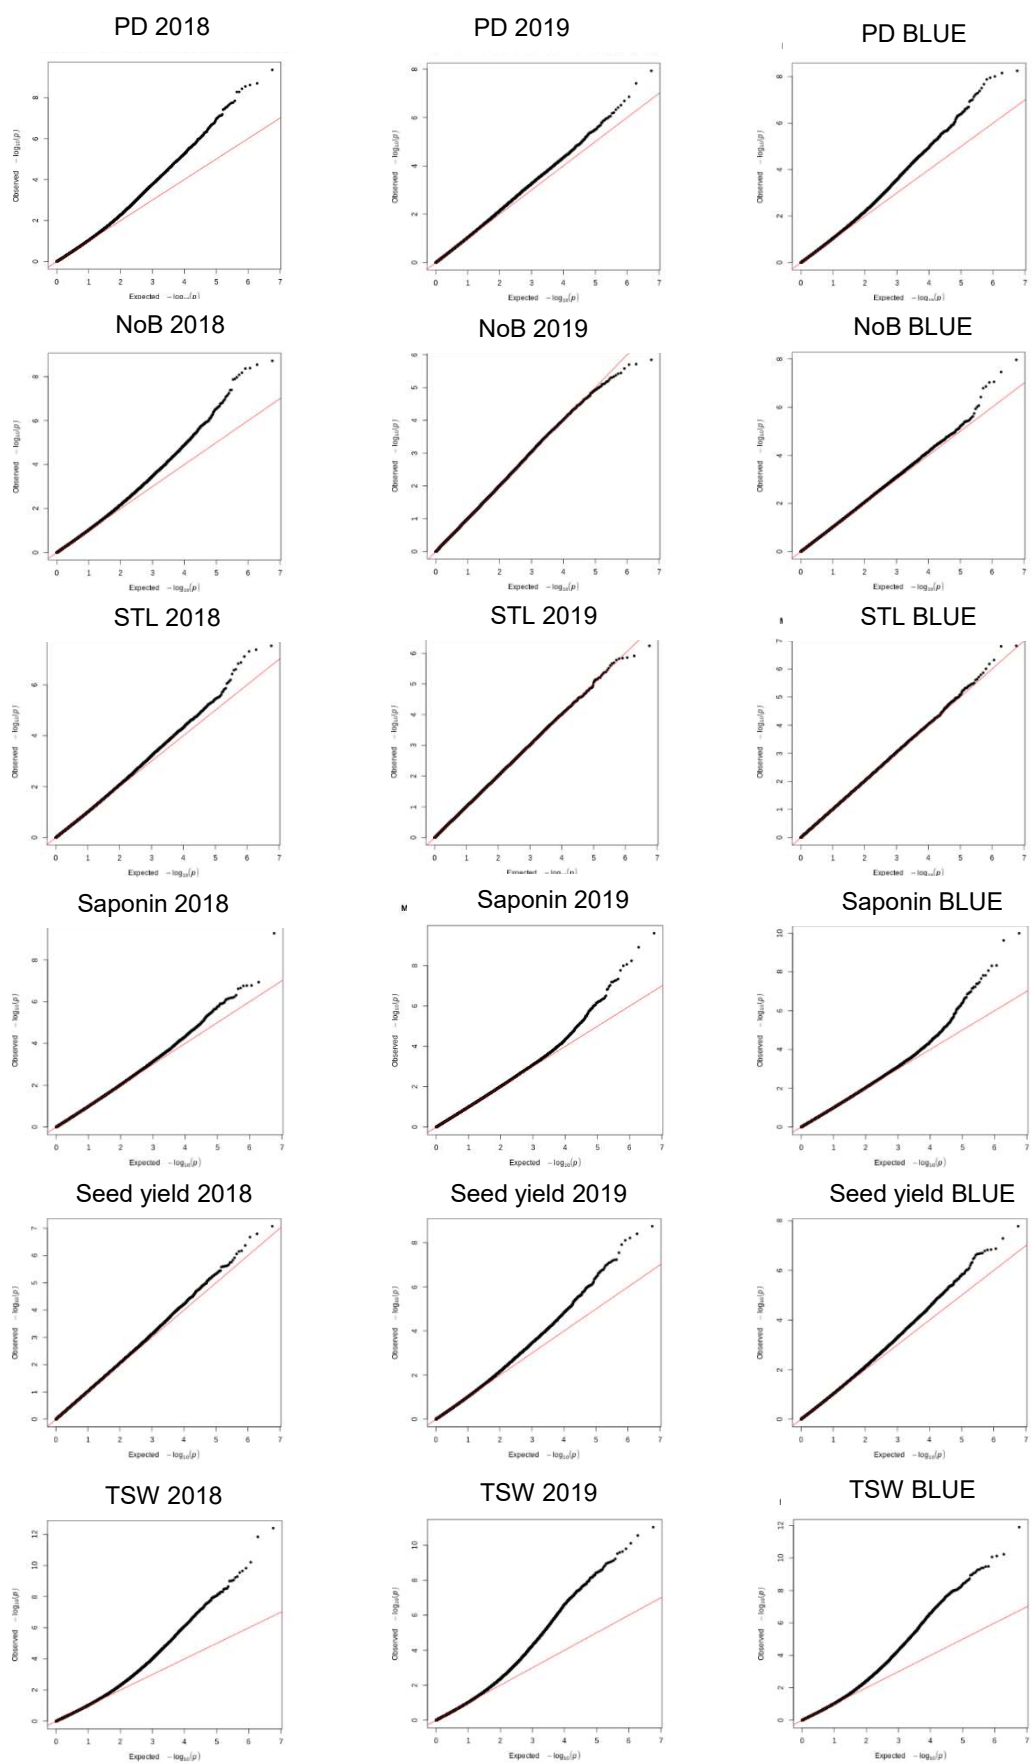

**Figure 3-figure supplement 6: cont.**

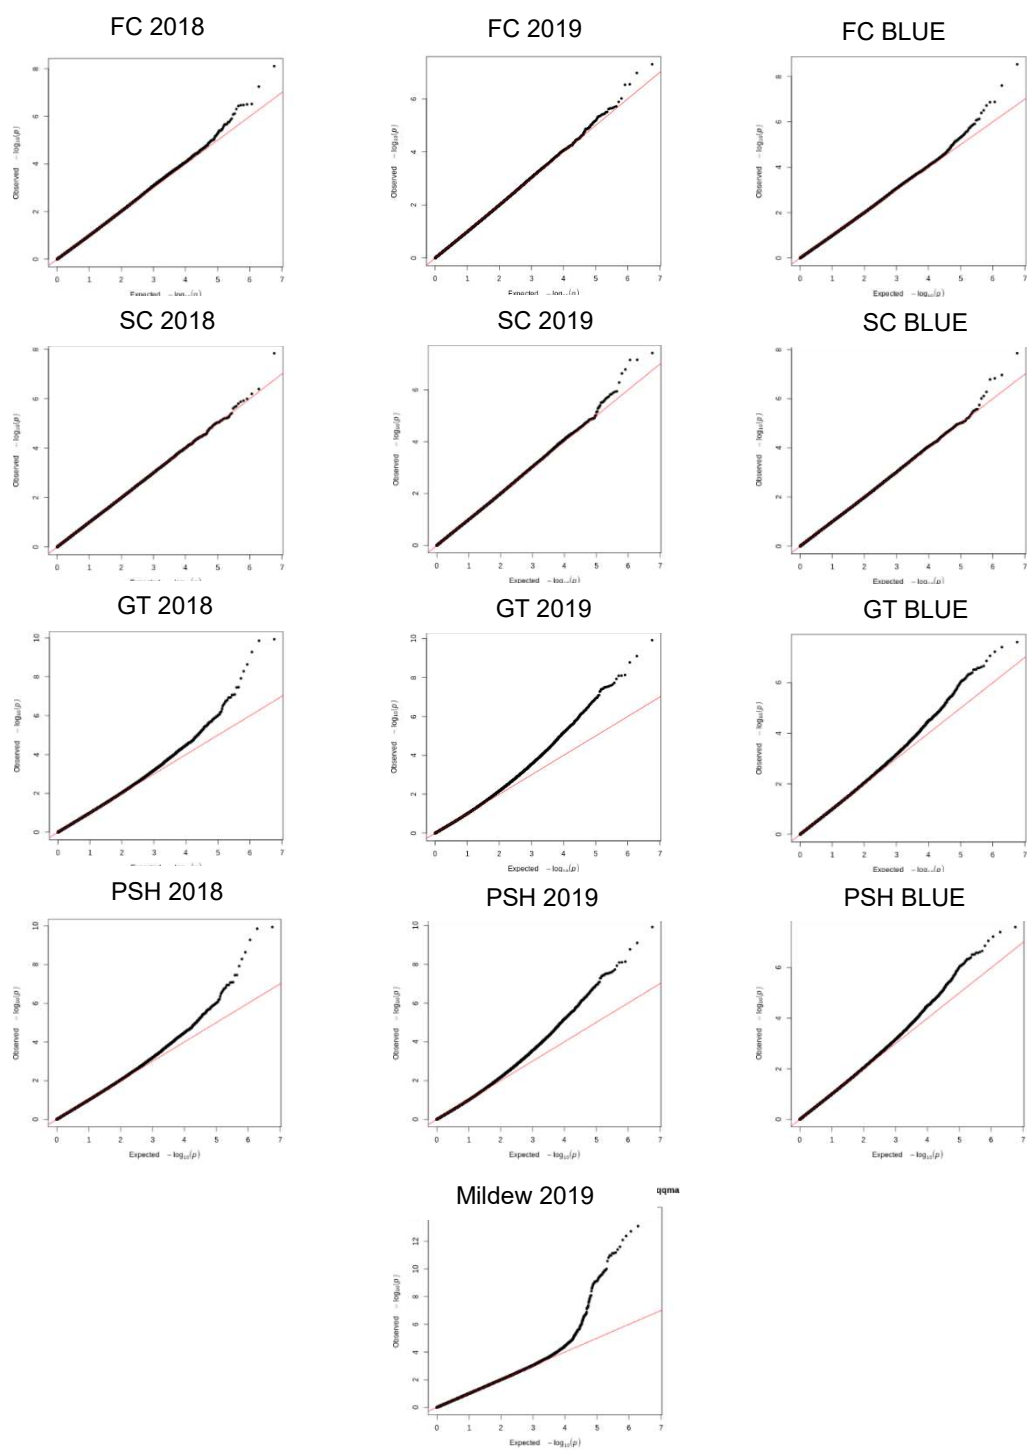

**Figure 3-figure supplement 6:** Quantile-quantile plots of GWAS in two years, 2018 (left) and 2019 (center), and best linear unbiased estimates (right).
