# Supplementary material for: Genome-wide association study in quinoa reveals selection pattern typical for crops with a short breeding history
Source: eLife journal article supplement (doi:10.7554/elife.66873), 2022-07-08
Supplement: supp [file elife-66873-supp-v1.zip]

(a)

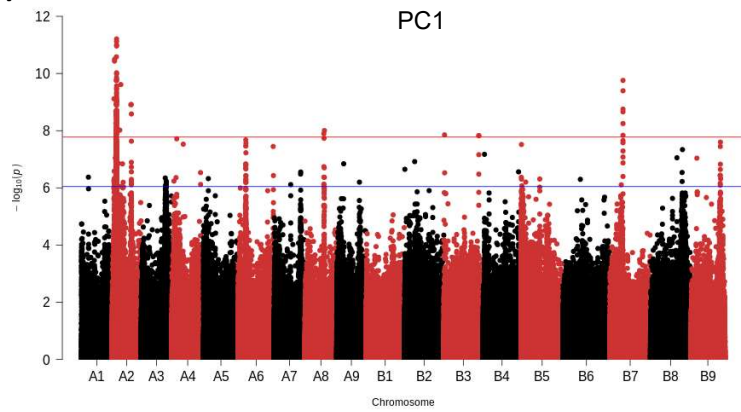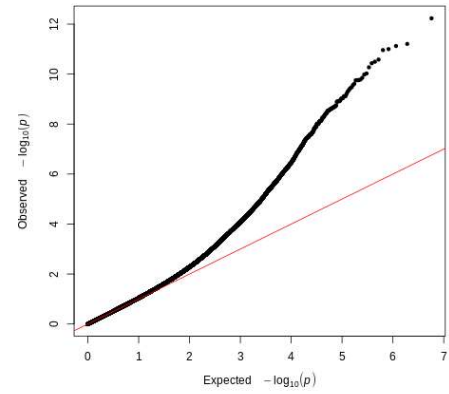

(b)

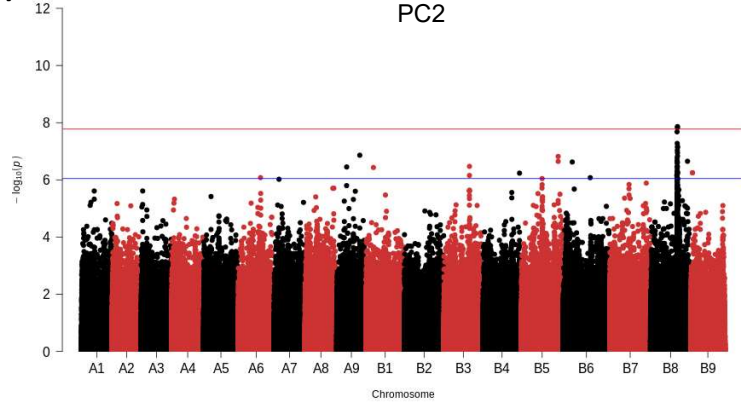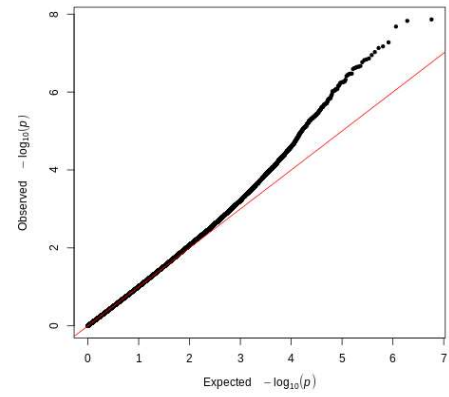

(c)

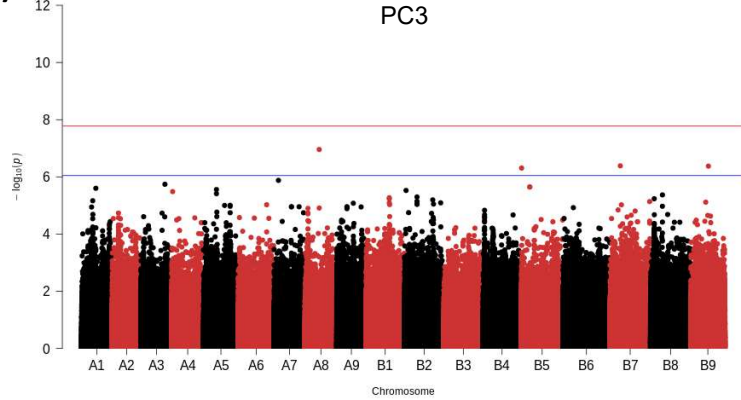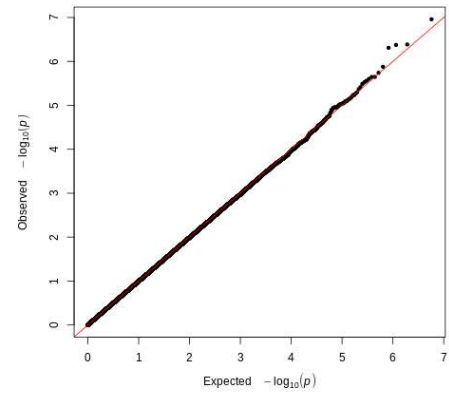

**Figure 3-figure supplement 8 :** GWAS analysis of principal components, PC1 (a), PC2 (b), PC3 (c): Manhattan plots (left), and quantile-quantile plots (right): The blue horizontal line in the Manhattan plots indicates the suggestive threshold  $-\log_{10}(8.98\text{E-}7)$ . The red horizontal line indicates the significance threshold (Bonferroni correction)  $-\log_{10}(1.67\text{e-}8)$ .
