# Supplementary material for: Genome-wide association study in quinoa reveals selection pattern typical for crops with a short breeding history
Source: eLife journal article supplement (doi:10.7554/elife.66873), 2022-07-08
Supplement: supp [file elife-66873-supp-v1.zip]

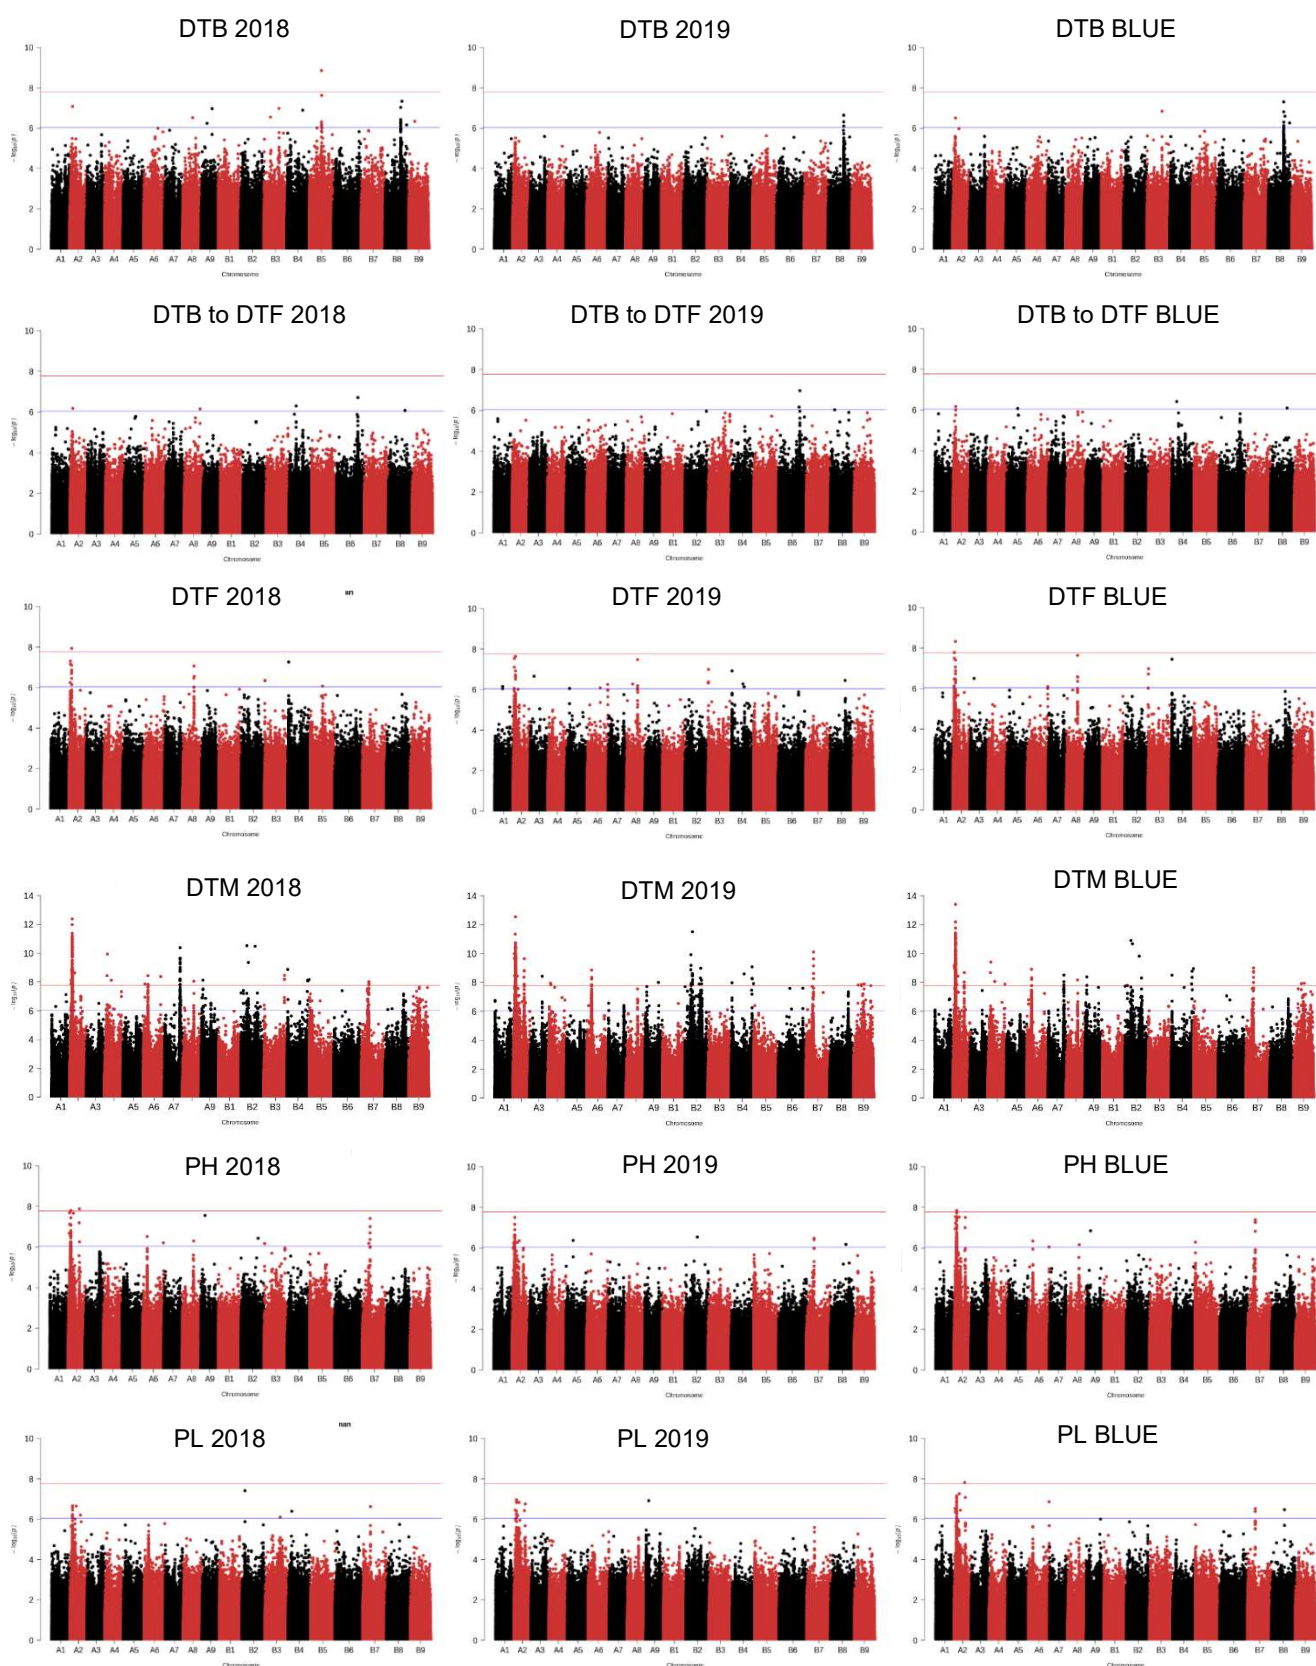

Figure 3-figure supplement 5: *cont.*

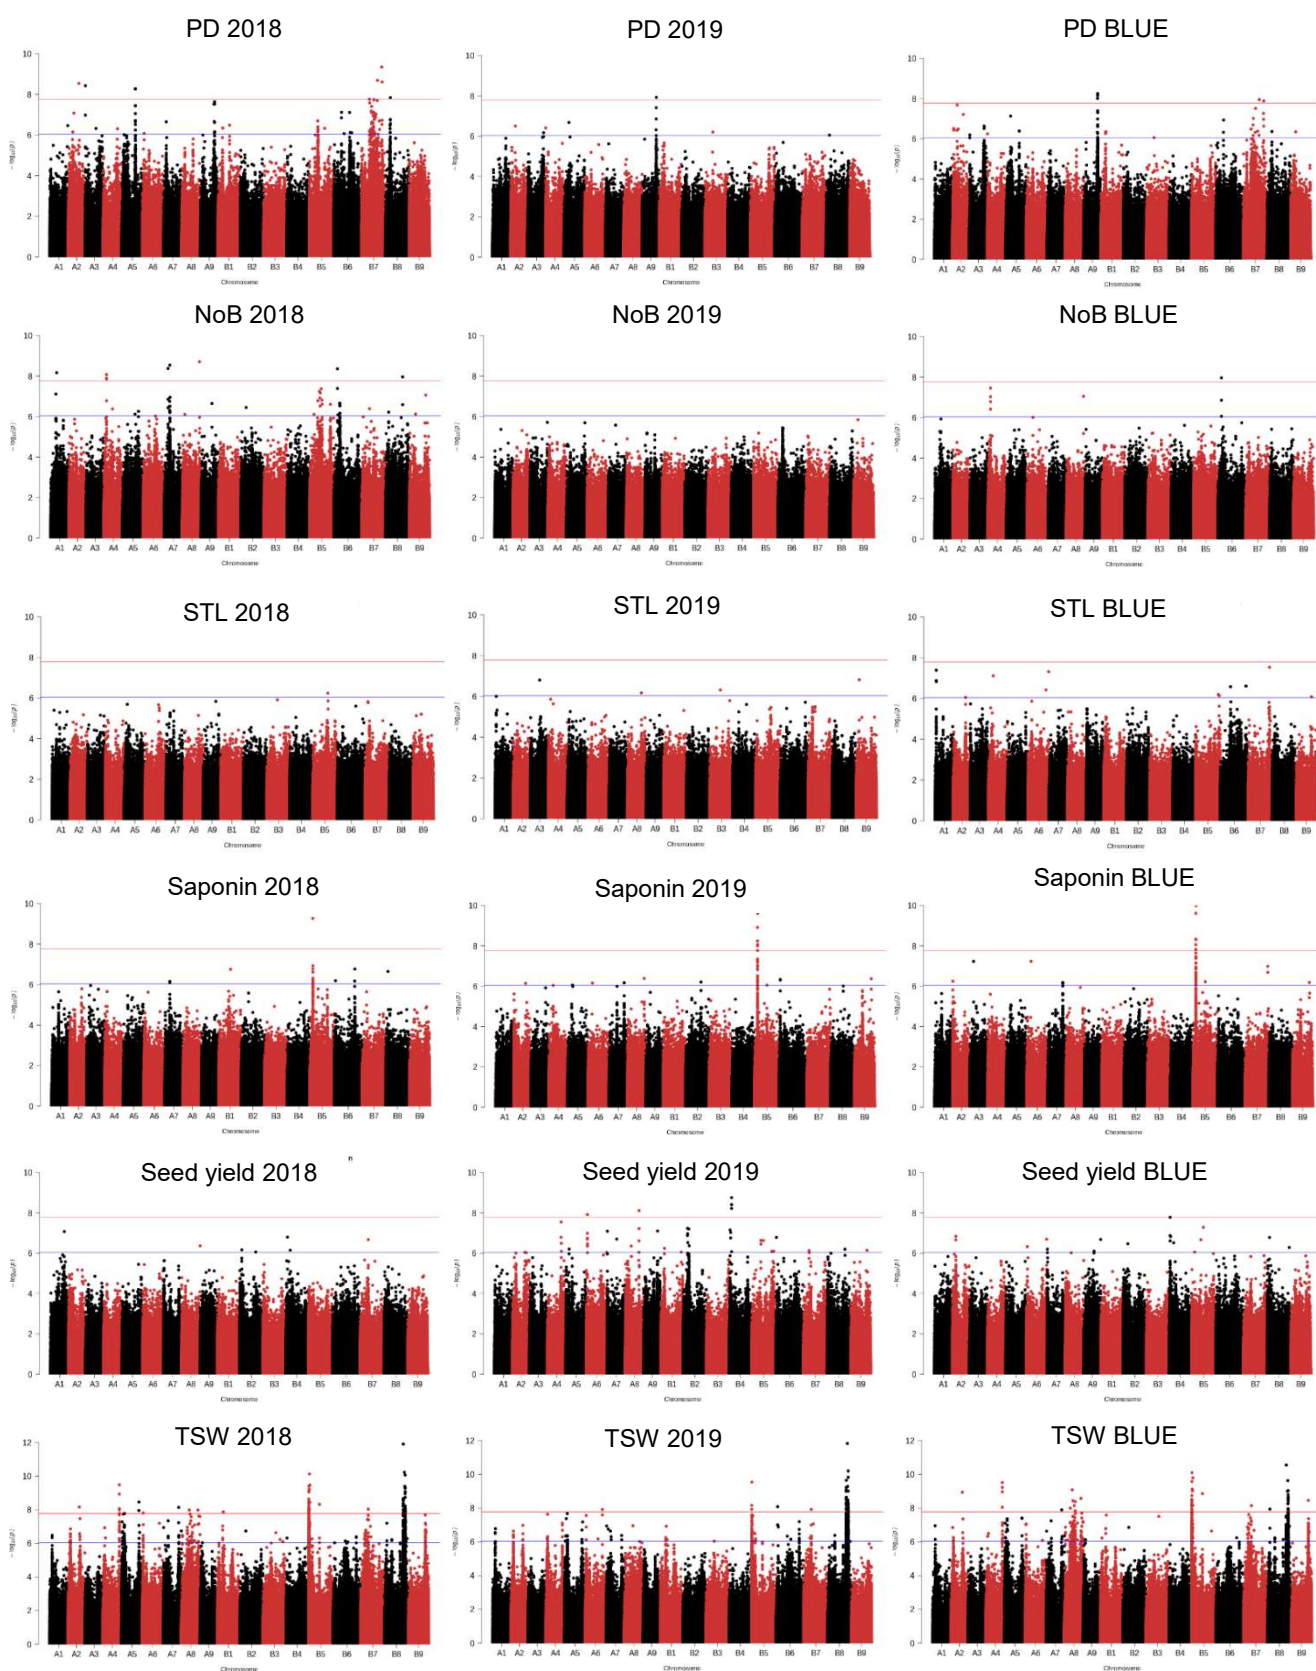

**Figure 3-figure supplement 5: cont.**

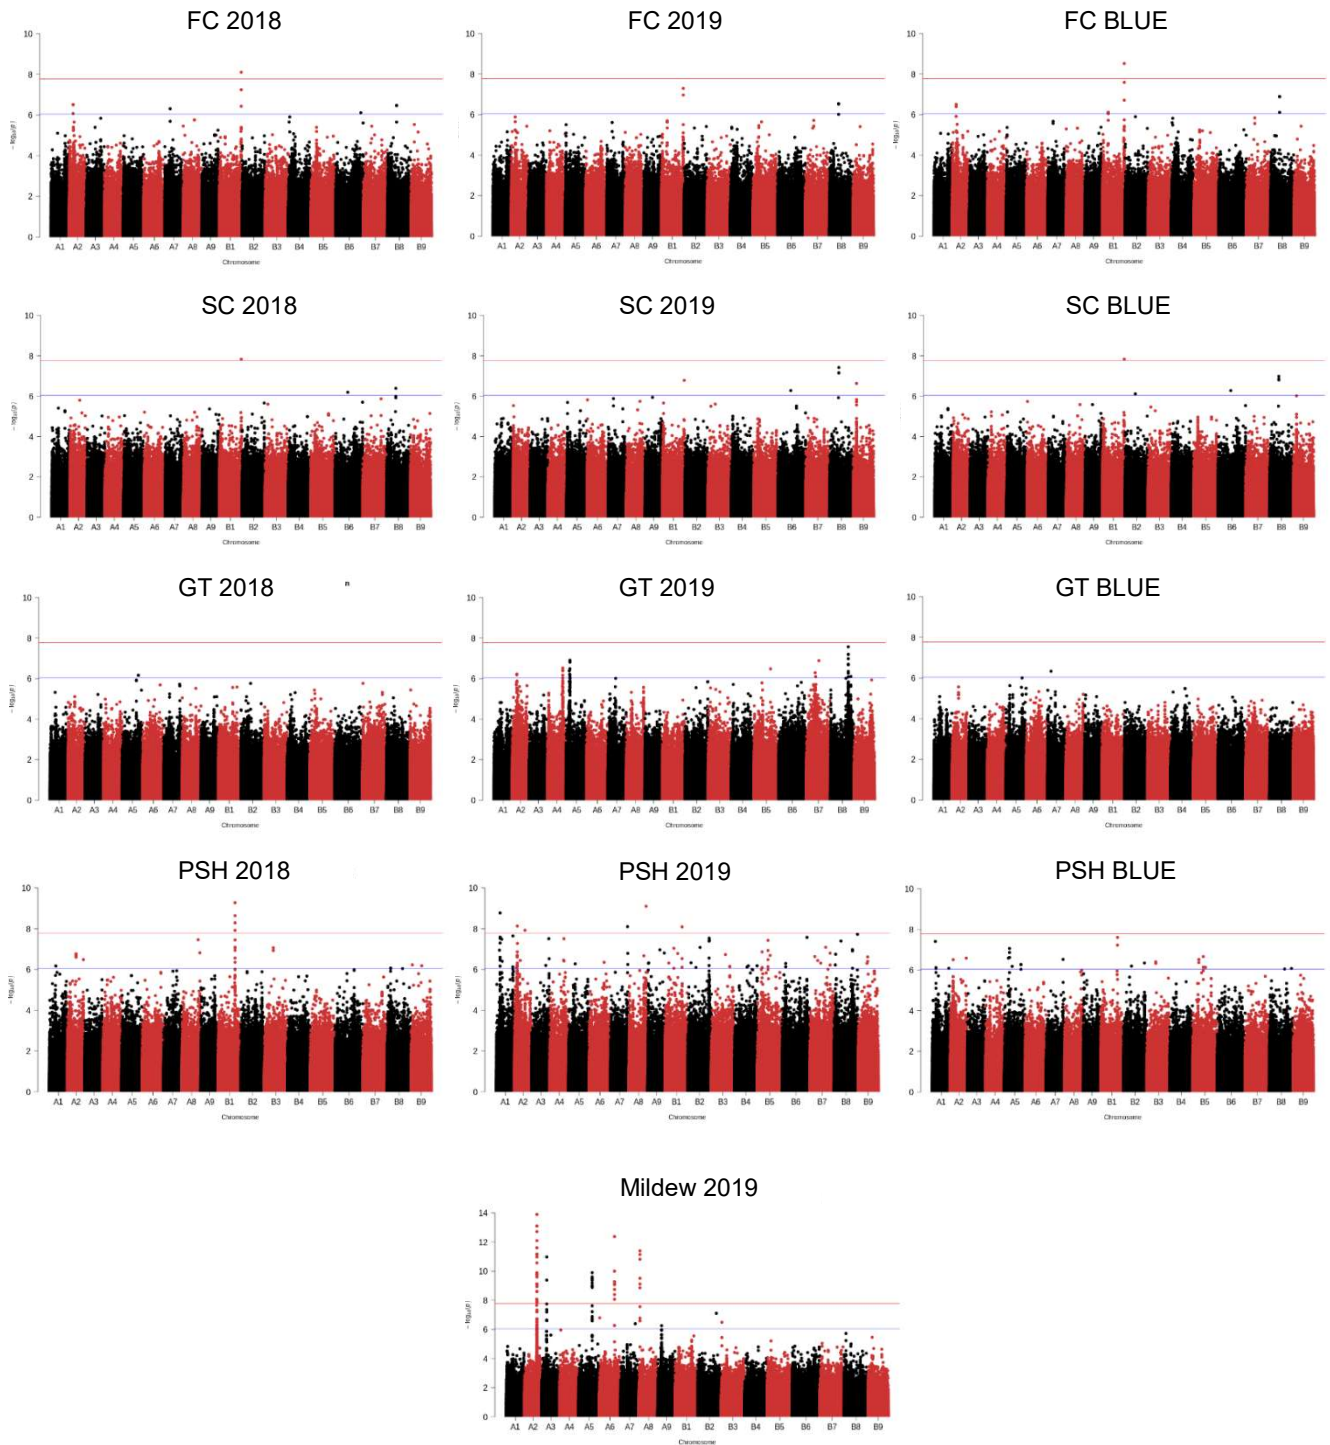

**Figure 3-figure supplement 5:** Manhattan plots from GWAS with data from 2018 (left), 2019 (center), and the mean of both years (right): The blue horizontal line indicates the suggestive threshold  $-\log_{10}(8.98\text{E-}7)$ . The red horizontal line indicates the significant threshold (Bonferroni correction)  $-\log_{10}(1.67\text{e-}8)$ .
