# Supplementary material for: Genome-wide association study in quinoa reveals selection pattern typical for crops with a short breeding history
Source: eLife journal article supplement (doi:10.7554/elife.66873), 2022-07-08
Supplement: supp [file elife-66873-supp-v1.zip]

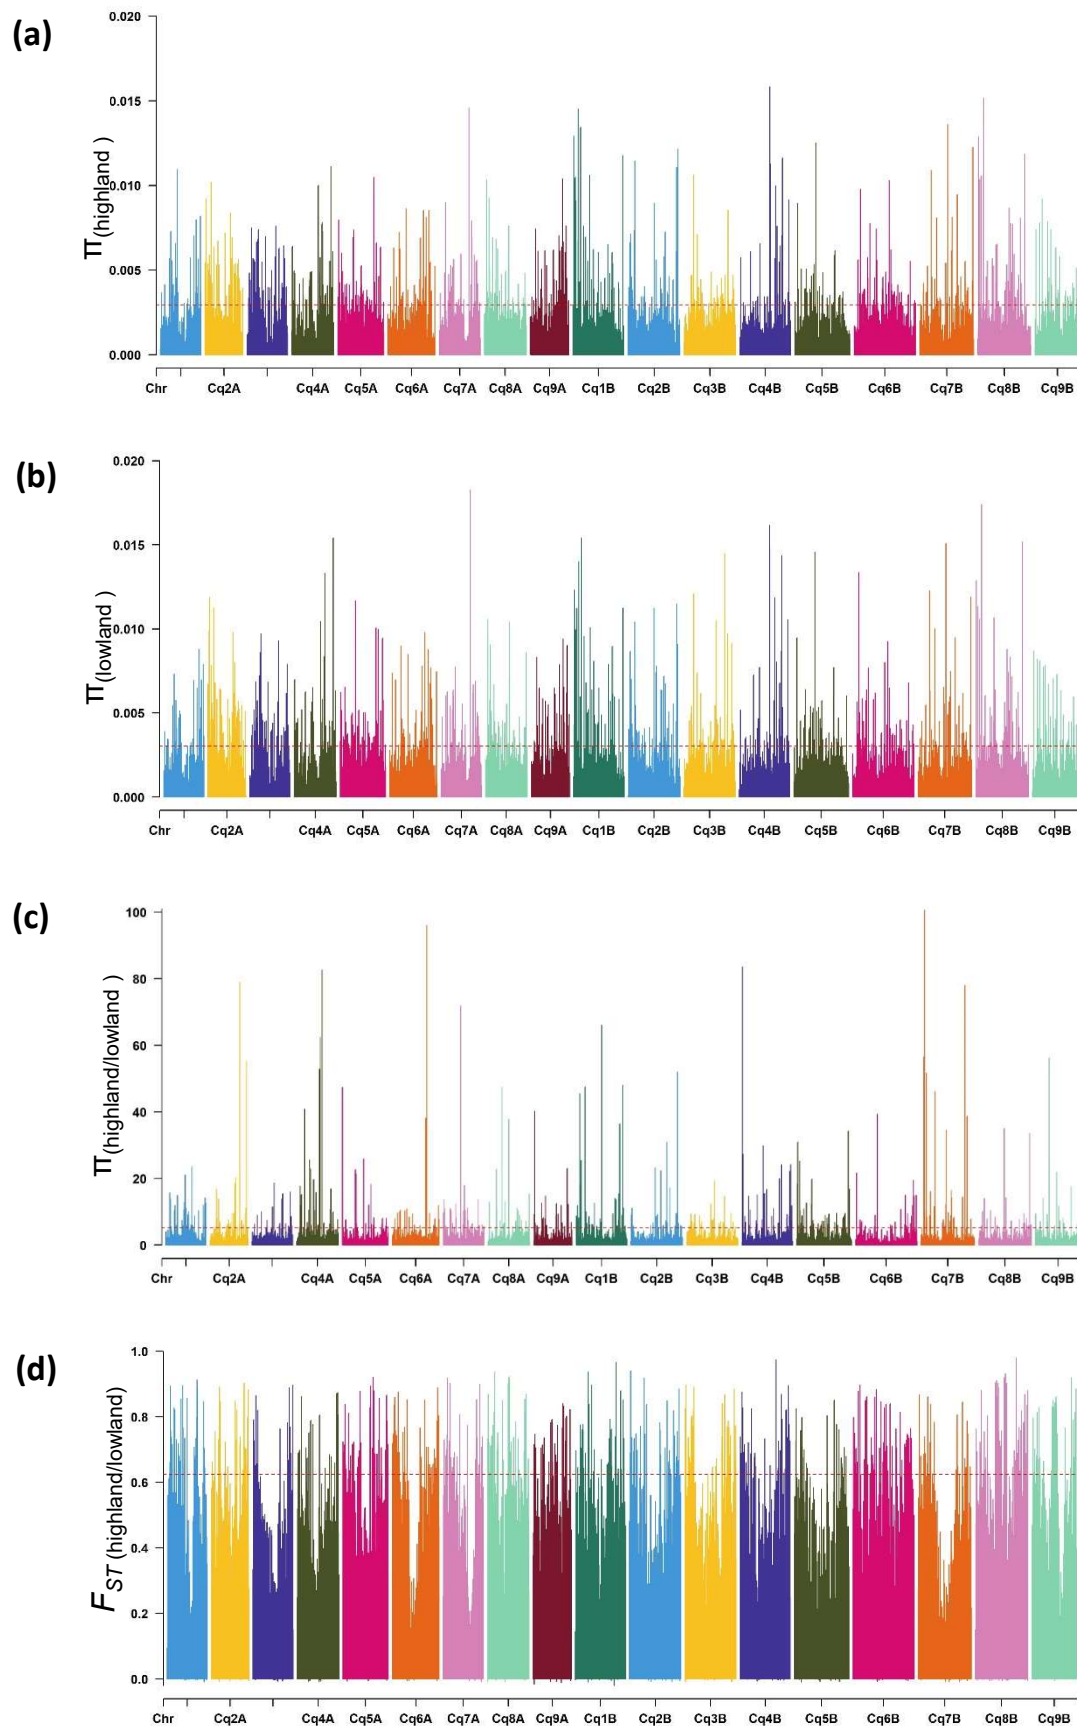

**Figure 1-figure supplement 7:** Diversity of populations along chromosomes measured based on 10 kb non-overlapping windows. Nucleotide diversity ( $\pi$ ) distribution of 10 kb windows in population Highland (a) and 7 Lowland (b). (c) Nucleotide diversity ratios ( $\pi_{\text{Lowland}} / \pi_{\text{Highland}}$ ). (d) Pairwise genome-wide fixation index ( $F_{ST}$ ) between Highland and Lowland. The broken horizontal line represents the top 1% threshold.
