# Supplementary material for: Genome-wide association study in quinoa reveals selection pattern typical for crops with a short breeding history
Source: eLife journal article supplement (doi:10.7554/elife.66873), 2022-07-08
Supplement: supp [file elife-66873-supp-v1.zip]

(a)

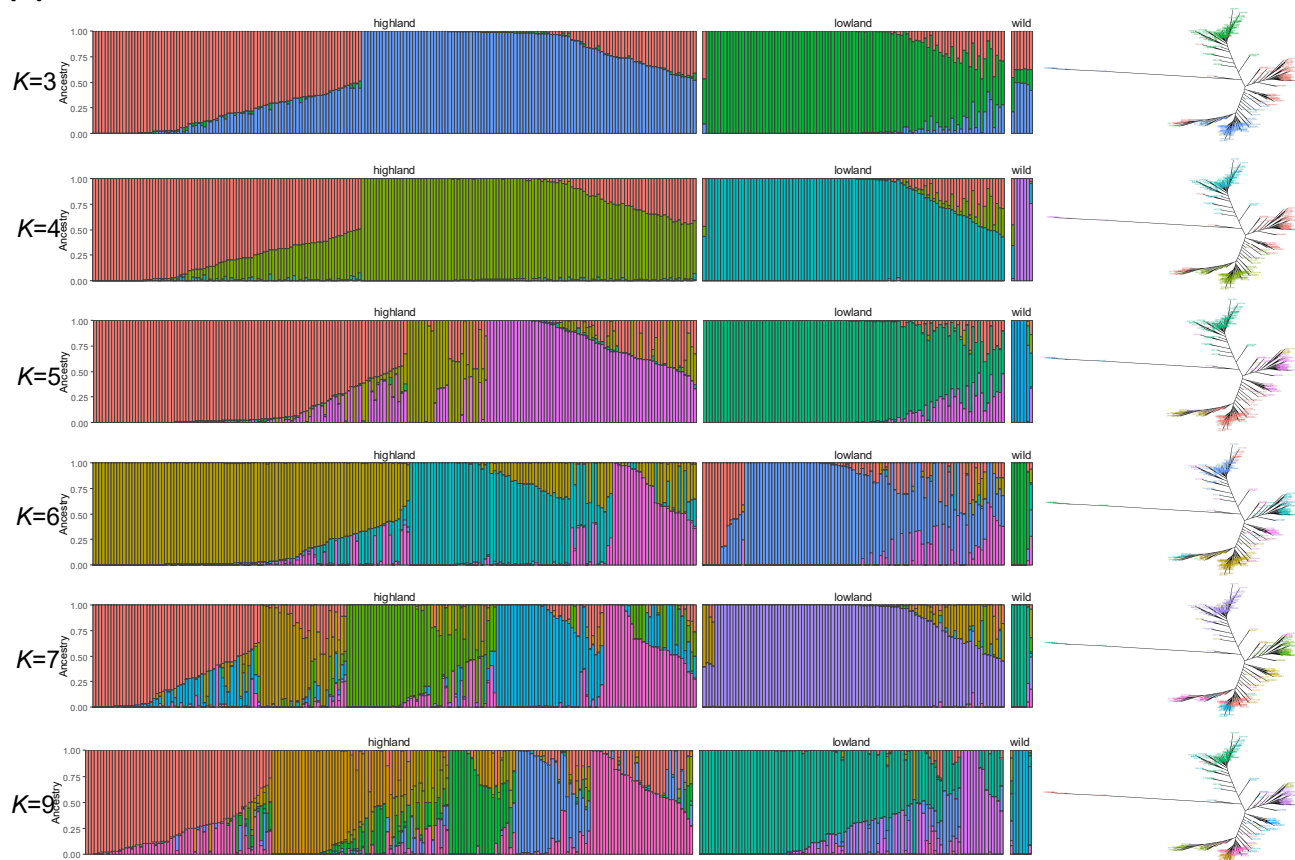

(b)

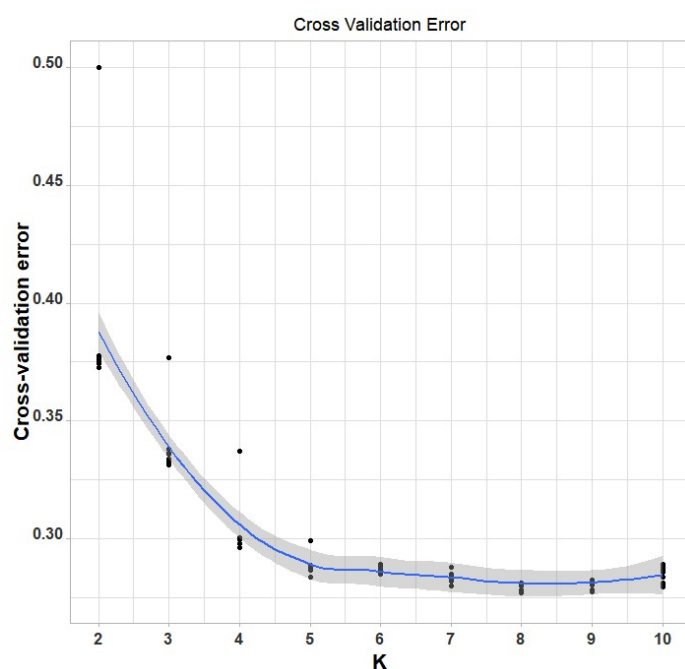

**Figure 1-figure supplement 6:** (a) ADMIXTURE ancestry coefficients for K ranging from 3 to 7 and 9. Each vertical bar represents an accession, and the color proportions on the bar correspond to the genetic ancestry. (b) Cross-validation error in ADMIXTURE run.
