# Supplementary material for: Genome-wide association study in quinoa reveals selection pattern typical for crops with a short breeding history
Source: eLife journal article supplement (doi:10.7554/elife.66873), 2022-07-08
Supplement: supp [file elife-66873-supp-v1.zip]

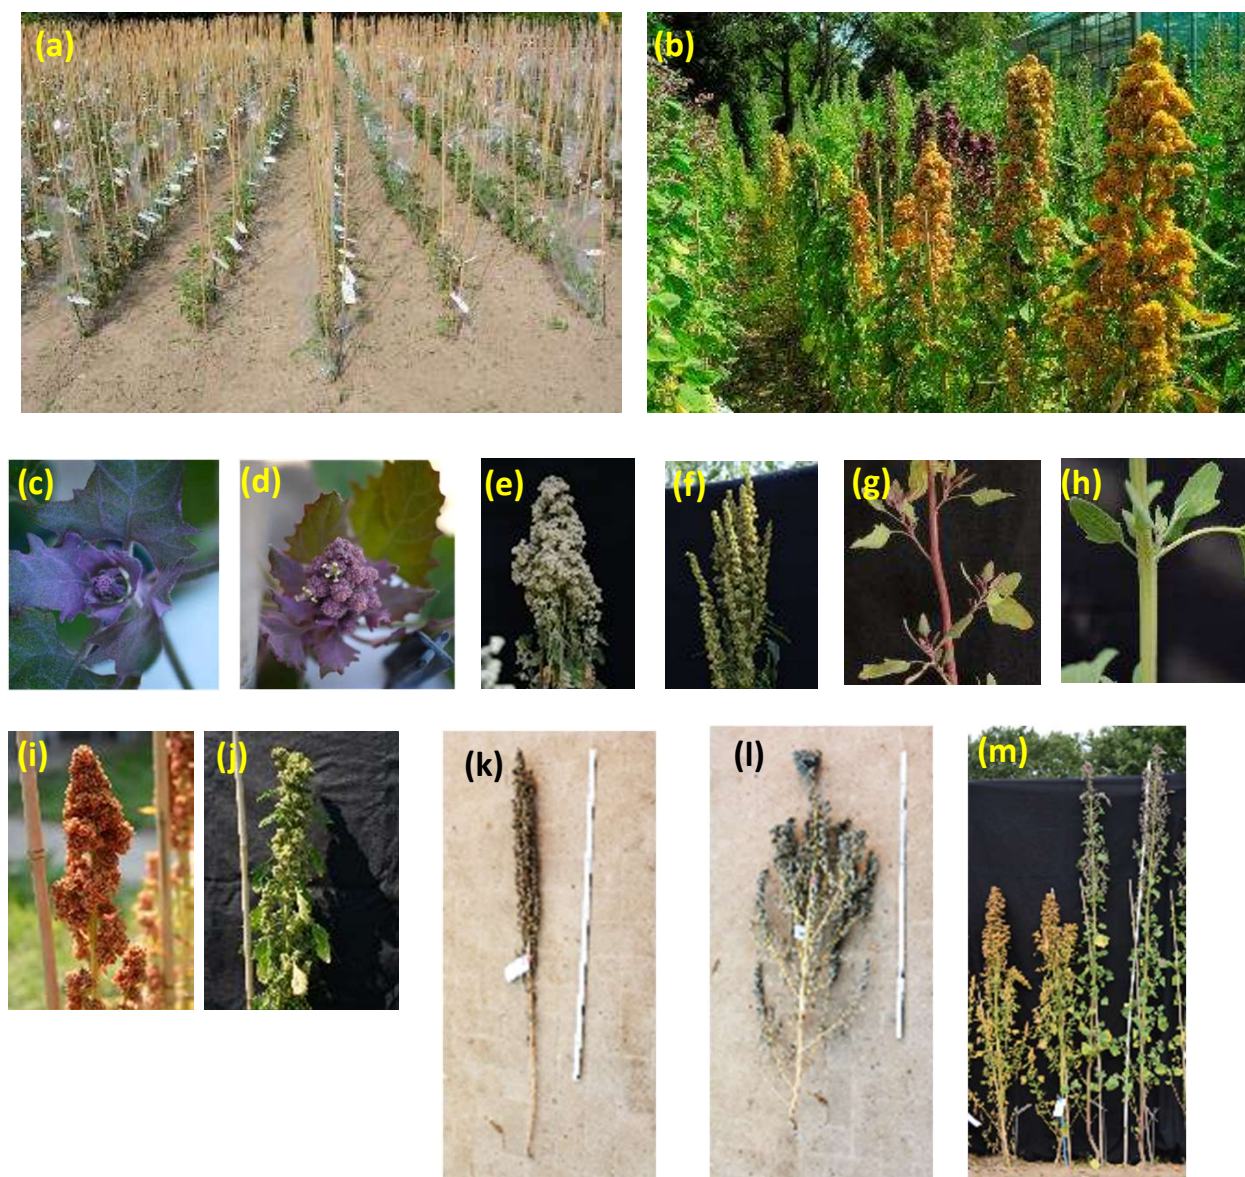

**Figure 3-figure supplement 1:** Overview of the field experiment and exemplary images demonstrating phenotypic traits; (a) and (b): Overview of the field and phenotypic variation among accession; (c): Bolting (BBCH51) and (d) flowering (BBCH60) stage; Glomerulate (e) and amarantiform (f) panicle shapes; red (g) and green (h) stem color; red (i) and green (j) flower/inflorescence; Growth type 1 (k) and type 5 (l); (m): Plant height and maturity variation between two accessions.
