# Supplementary material for: Genome-wide association study in quinoa reveals selection pattern typical for crops with a short breeding history
Source: eLife journal article supplement (doi:10.7554/elife.66873), 2022-07-08
Supplement: supp [file elife-66873-supp-v1.zip]

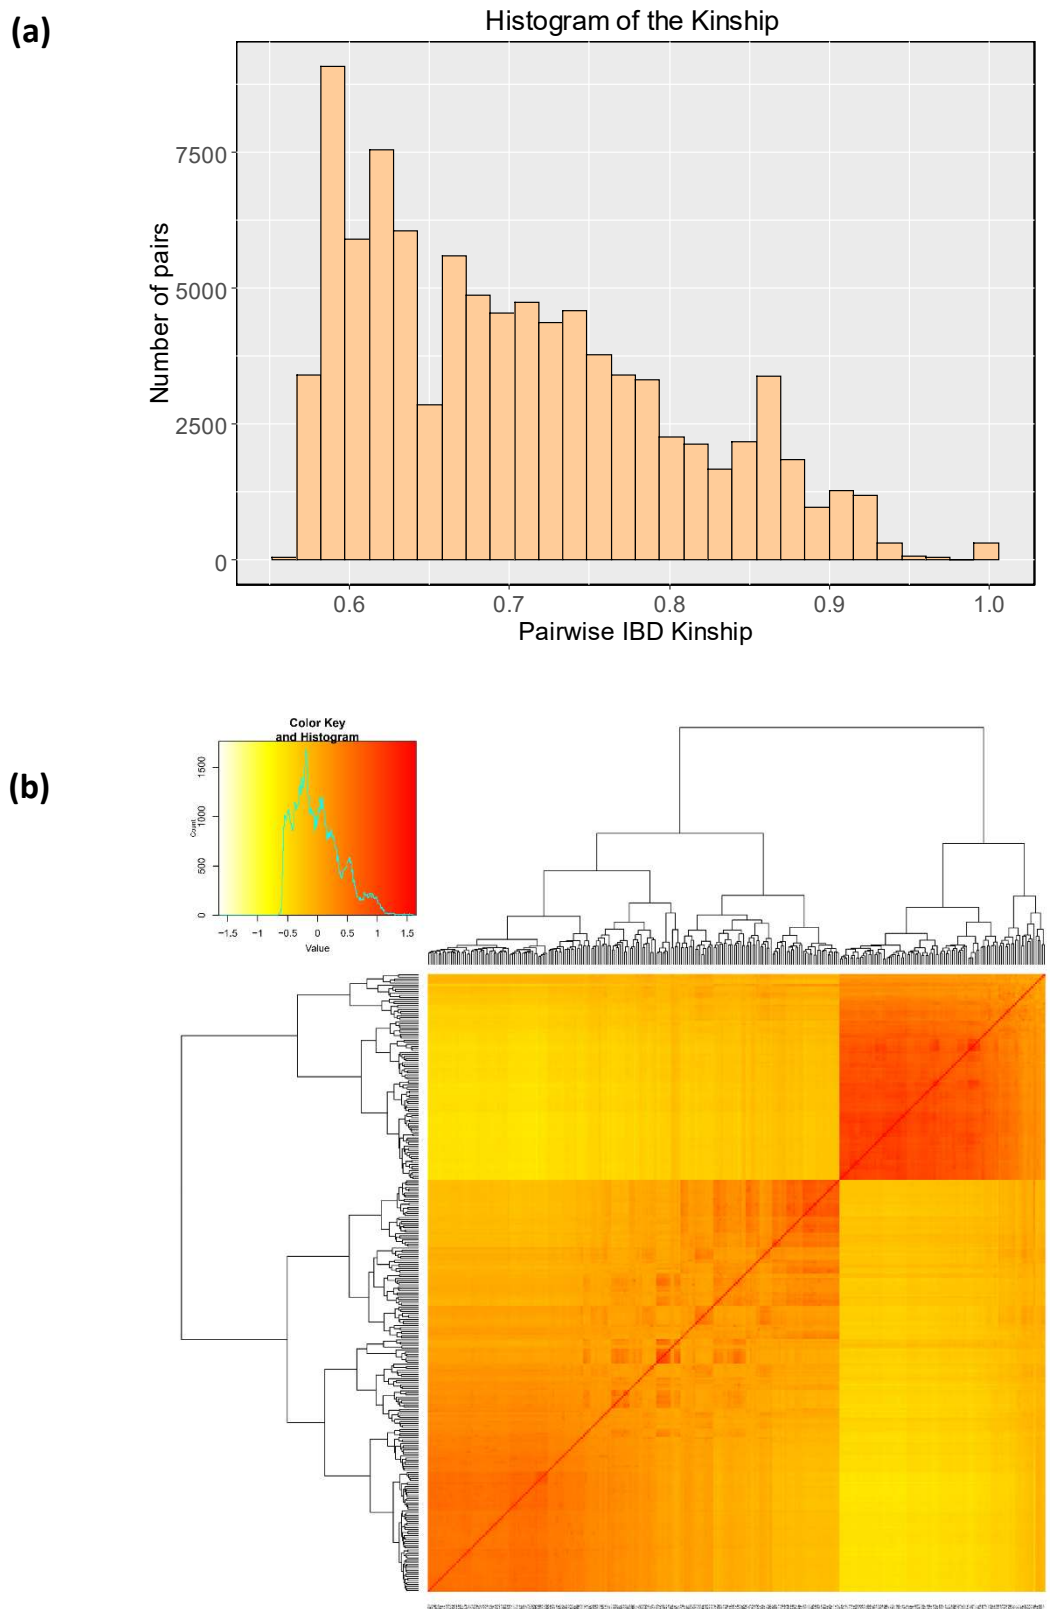

**Figure 2-figure supplement 1:** (a) Histogram representing the distribution of pairwise IBS kinship estimated using EMMAX. The same kinship matrix was used to represent the relationship among individuals in the GWAS analysis. (b) The heatmap of the pairwise kinship relationship was estimated using the Van Raden method using GAPIT software (Tang et al., 2016).
