# Supplementary material for: Genome-wide association study in quinoa reveals selection pattern typical for crops with a short breeding history
Source: eLife journal article supplement (doi:10.7554/elife.66873), 2022-07-08
Supplement: supp [file elife-66873-supp-v1.zip]

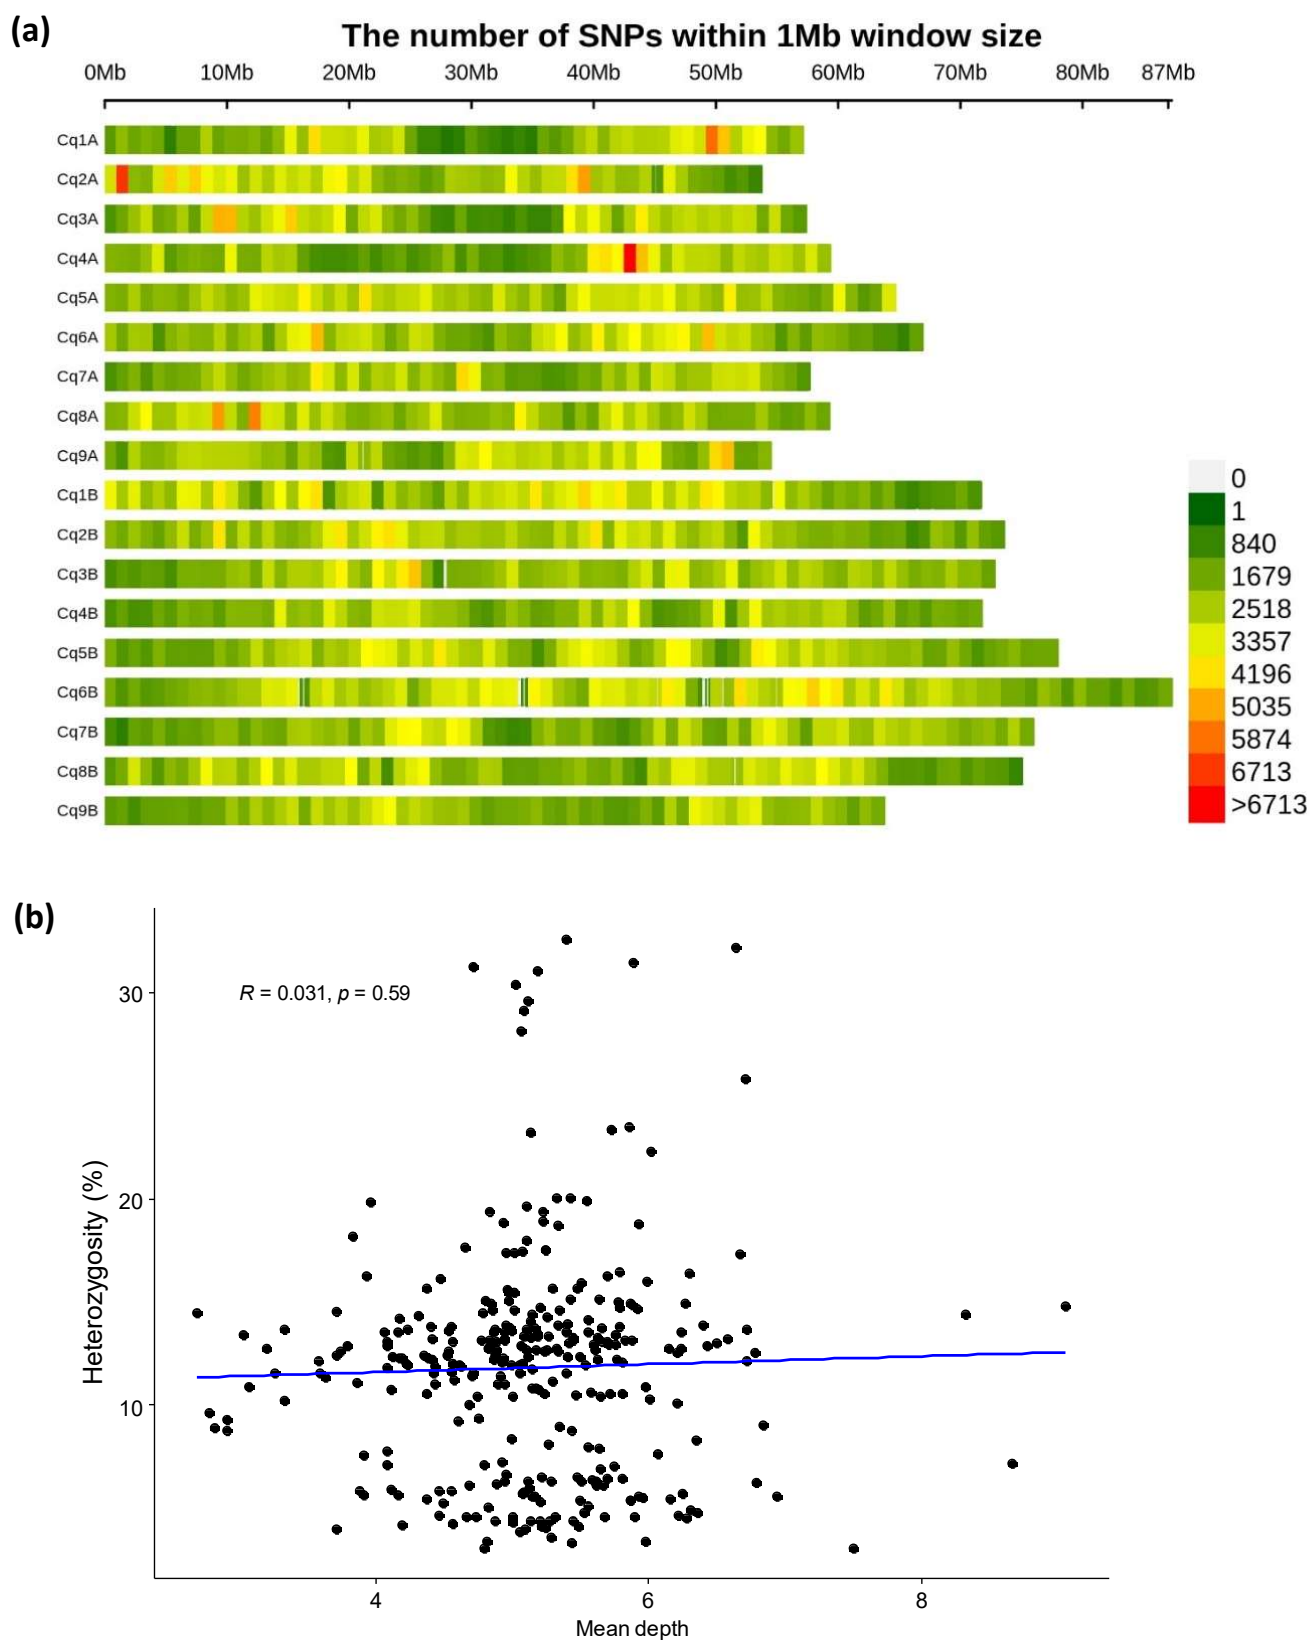

**Figure 1-figure supplement 2 (a)** SNP density heat map across the 18 quinoa chromosomes. Different colors depict SNP density. **(b)** Scatter plot between mean depth and heterozygosity of accessions. Dots represent 310 different accessions.
