# Supplementary material for: Genome-wide association study in quinoa reveals selection pattern typical for crops with a short breeding history
Source: eLife. 2022 Jul 8;11:e66873. doi: 10.7554/eLife.66873 (PMC9388097; doi:10.7554/eLife.66873)
Supplement: Supplementary file 1. — (a) Accessions from the quinoa diversity panel and results from re-sequencing. (b) Summary of high-quality SNPs identified in quinoa accessions. (c) Variance components analysis of 12 quantitative traits. (d) Summary of marker-trait associations (MTA). (e) Candidate genes linked to SNPs with significant trait associations. (f) Summary of MTA associated with days to flowering, days to maturity, panicle density, and plant height identified on chromosome Cq2A. (g) Candidate genes located within the 50 kb flanking regions of significantly associated SNPs from the multivariate GWAS analysis. (h) Daily temperature, precipitation, humidity, radiation, and wind speed during the cultivation seasons 2018 and 2019 in Kiel, Germany. [file elife-66873-supp1.xlsx]

## Sheet: Supplementary file 1a
Table S1: Accessions from the quinoa diversity panel and results from re-sequencing. n.a: not applicable .
Accession name	SampleID	Population	Country	Raw reads	Raw data(G)	Q30(%)	GC(%)	mean DP	MEAN_DEPTH	Remarks
PI-510545	S3G4	lowland	Peru	19752102	5.9	78.94	37.83	4.07	2.81773	This study
D-9994	S4C4	highland	Unknown	20912501	6.3	92.03	41.24	4.34	2.69568	This study
CHEN-423	S2B4	highland	Peru	21800620	6.5	77.89	39.14	4.48	2.78654	This study
CHEN-142	S4B4	highland	Bolivia	22205198	6.7	78.84	38.42	4.62	2.91157	This study
CHEN-160	S1B4	highland	Bolivia	22272979	6.7	78.95	38.18	4.62	2.91622	This study
CHEN-224	S2A10	highland	Peru	22396708	6.7	91.03	43.2	4.62	3.03286	This study
NSL-92331	S3B4	highland	Unknown	24038040	7.2	91.41	38.23	4.97	3.33106	This study
D-12229	S4H11	highland	Peru	24899121	7.5	92.44	42.16	5.17	3.26347	This study
PI-510532	S3E10	highland	Peru	25303589	7.6	91.61	44.91	5.24	3.07074	This study
D-12081	S4H5	highland	Peru	25176758	7.6	92.99	42.16	5.24	3.33003	This study
PI-634917	S1G7	lowland	Chile	26125057	7.8	91.7	38.84	5.38	3.70949	This study
D-9977	S4H1	highland	Unknown	26320366	7.9	92.02	41.11	5.45	3.20608	This study
PI-665272	S4D1	highland	Australia	26191724	7.9	92.22	40.59	5.45	3.58533	This study
D-11935	S4A10	highland	Peru	26360778	7.9	91.86	41.2	5.45	3.59487	This study
D-9998	S4E1	highland	Unknown	27117824	8.1	92.22	41.19	5.59	3.73972	This study
CHEN-161	S4G7	highland	Bolivia	26952155	8.1	92.17	41.81	5.59	3.82942	This study
CHEN-144	S4E11	highland	Bolivia	28778875	8.6	92.09	42.02	5.93	3.71078	This study
CHEN-391	S3H4	lowland	Peru	28681608	8.6	91.51	40.53	5.93	3.91448	This study
D-12183	S2A1	highland	Peru	28879285	8.7	90.22	42.23	6	3.71257	This study
BO-30	S2F5	lowland	Chile	29157073	8.7	92.08	39.93	6	4.11714	This study
BO-52	S3D4	highland	Chile	29104810	8.7	91.97	38.47	6	4.11794	This study
D-12251	S3F8	highland	Peru	29368887	8.8	91.63	39.25	6.07	3.63213	This study
CHEN-358	S4A2	highland	Peru	29725490	8.9	92.12	41.29	6.14	3.96105	This study
D-12208	S1H8	highland	Bolivia	29563701	8.9	92.25	38.55	6.14	4.08534	This study
CHEN-128	S2F8	highland	Bolivia	29587667	8.9	92.03	40.41	6.14	4.23775	This study
PI-510549	S2D8	highland	Peru	29671311	8.9	92.52	40.16	6.14	4.37555	This study
CHEN-197	S4H6	highland	Bolivia	30360769	9.1	92.5	39.66	6.28	3.93847	This study
BO-13	S1D10	lowland	Chile	30468332	9.1	91.99	39.18	6.28	4.46732	This study
CHEN-404	S1A10	highland	Peru	30394347	9.1	91.38	38.81	6.28	4.52567	This study
CHEN-89	S3A3	highland	Peru	30662529	9.2	91.6	37.84	6.34	4.56185	This study
PI-478414	S4E7	highland	Bolivia	31047591	9.3	93.18	41.11	6.41	4.16149	This study
Ames-13749	S1H7	lowland	United States	31424765	9.4	92.39	39.03	6.48	4.08146	This study
CHEN-415	S2H2	highland	Peru	31687149	9.5	92.66	41.47	6.55	4.06828	This study
CHEN-425	S4G6	highland	Peru	31797099	9.5	91.84	40.11	6.55	4.31569	This study
PI-478418	S3B5	highland	Bolivia	31618676	9.5	91.88	38.59	6.55	4.54953	This study
PUC-mix-green	S1G8	lowland	Chile	31555770	9.5	89.94	38.16	6.55	4.56804	This study
PI-614919	S4F1	highland	Bolivia	32159831	9.6	91.05	42.83	6.62	4.12044	This study
D-12036	S1F3	highland	Peru	31910993	9.6	91.66	39.2	6.62	4.35182	This study
D-12320	S4H8	highland	Peru	31909542	9.6	93	41.64	6.62	4.40299	This study
D-12074	S3A10	highland	Peru	32077135	9.6	91.91	39.47	6.62	4.41028	This study
NSL-86649	S2E1	lowland	Unknown	32343423	9.7	91.79	41.52	6.69	4.0861	This study
D-12162	S4D11	highland	Peru	32464002	9.7	92.08	41.22	6.69	4.08875	This study
D-12027	S4B1	highland	Peru	32615155	9.8	92.11	39.71	6.76	4.17046	This study
G-205	S4B3	lowland	Unknown	32710681	9.8	92	43.19	6.76	4.17634	This study
CHEN-344	S3H5	lowland	Peru	32701923	9.8	91.64	39.55	6.76	4.1901	This study
D-12395	S4F7	highland	Bolivia	32829044	9.8	92.37	39.45	6.76	4.43162	This study
D-9973	S1F11	highland	Unknown	32675504	9.8	91.49	39.41	6.76	4.43271	This study
CHEN-126	S1E8	highland	Bolivia	32552293	9.8	92.47	38.45	6.76	4.53101	This study
PI-510533	S2D7	highland	Peru	32730684	9.8	92.4	39.68	6.76	4.56171	This study
D-12020	S4H4	highland	Peru	32648842	9.8	92.71	39.78	6.76	4.83912	This study
Ames-13738	S1F7	lowland	United States	32621542	9.8	92.18	38.51	6.76	4.88454	This study
PI-614914	S3A8	highland	Bolivia	32870261	9.9	91.66	38.42	6.83	3.86008	This study
Ames-13737	S4F11	lowland	United States	33115082	9.9	91.42	40.78	6.83	4.16459	This study
PI-665283	S4B7	lowland	United States	32992015	9.9	92.7	40.81	6.83	4.49386	This study
Ames-13725	S3A4	highland	United States	33059707	9.9	91.52	38.14	6.83	4.86634	This study
CHEN-413	S4H10	highland	Peru	33175704	10	92.88	40.38	6.9	4.08576	This study
D-12405	S1H10	highland	Peru	33334424	10	92.22	38.26	6.9	4.38887	This study
CHEN-33	S1F9	lowland	Unknown	33496919	10	91.28	38.73	6.9	4.55709	This study
Ames-13760	S1G10	lowland	United States	33314480	10	91.43	38.52	6.9	4.68373	This study
BO-60	S3D6	highland	Chile	33246397	10	91.67	38.45	6.9	4.71745	This study
D-11986	S3B8	highland	Peru	33185125	10	89.81	38.74	6.9	4.73998	This study
D-12253	S4C7	highland	Bolivia	33478132	10	92.6	42.52	6.9	5.18069	This study
BO-11	S4H9	lowland	Chile	33596089	10.1	92.47	40.85	6.97	3.88234	This study
Ames-13740	S2E6	lowland	United States	33777851	10.1	92.55	40.67	6.97	4.37512	This study
CHEN-450	S3F4	highland	Peru	33543713	10.1	91.33	37.95	6.97	4.89597	This study
D-11893	S3E8	highland	Peru	34071854	10.2	91.84	42.69	7.03	4.19169	This study
CHEN-222	S2G3	highland	Bolivia	34095871	10.2	91.69	40.57	7.03	4.55316	This study
PI-614885	S1C9	lowland	Chile	33905968	10.2	90.68	38.03	7.03	4.65978	This study
PI-634924	S1H9	lowland	Chile	33924015	10.2	91.53	38.53	7.03	4.73266	This study
CHEN-140	S3E4	lowland	Bolivia	34136096	10.2	89.4	38.27	7.03	5.00498	This study
CHEN-182	S3G8	highland	Peru	34460524	10.3	91.6	38.25	7.1	4.57448	This study
CHEN-382	S1C10	highland	Peru	34299502	10.3	91.84	39.11	7.1	4.99235	This study
CHEN-376	S4A3	highland	Peru	34506641	10.4	91.49	43.41	7.17	3.78984	This study
D-11927	S4H2	highland	Peru	34557741	10.4	91.88	40.99	7.17	4.41746	This study
CHEN-71	S2C9	highland	Bolivia	34532939	10.4	91.81	41.57	7.17	4.47271	This study
CHEN-65	S2C2	highland	Peru	34598656	10.4	92.28	41.6	7.17	4.53519	This study
Indian Quinoa	S1E4	lowland	Unknown	34596299	10.4	92.42	38.7	7.17	5.00907	This study
D-12082	S4H3	highland	Peru	35015640	10.5	92.39	40.55	7.24	4.2296	This study
Ames-13726	S1D11	lowland	United States	34912714	10.5	91.56	40.86	7.24	4.60829	This study
D-12413	S4G2	highland	Bolivia	35008844	10.5	91.97	40.09	7.24	4.65603	This study
PI-614880	S2B1	lowland	Chile	34835969	10.5	91.8	39.7	7.24	4.79787	This study
D-12411	S1H11	highland	Peru	35110665	10.5	91.74	39.25	7.24	4.82467	This study
CHEN-389	S1A7	highland	Peru	35043704	10.5	91.92	38.89	7.24	4.87164	This study
D-12175	S1E11	highland	Peru	35153421	10.5	92.26	38.71	7.24	4.93018	This study
D-12393	S3C4	highland	Peru	35125006	10.5	91.23	38.41	7.24	5.06695	This study
CHEN-397	S3D10	highland	Peru	35172106	10.6	92.14	42.53	7.31	4.42031	This study
CHEN-174	S4B9	highland	Bolivia	35250772	10.6	92.19	41.43	7.31	4.62674	This study
D-12060	S3A9	highland	Peru	35276085	10.6	91.56	38.86	7.31	4.70688	This study
D-12135	S4C10	highland	Peru	35186182	10.6	92.57	39.5	7.31	4.87084	This study
CHEN-417	S3C10	highland	Peru	35449370	10.6	91.65	39.58	7.31	4.88739	This study
CHEN-333	S4D4	highland	Peru	35257904	10.6	90.28	39.22	7.31	4.93883	This study
CHEN-465	S1D2	highland	Peru	35331375	10.6	91.86	38.65	7.31	4.95997	This study
D-12122	S4A4	highland	Peru	35457772	10.6	92.29	39.97	7.31	4.97955	This study
PI-510543	S1F10	highland	Peru	35251872	10.6	91.62	39.5	7.31	5.05325	This study
Bouchane-1	S3A6	lowland	Unknown	35253813	10.6	91.16	37.98	7.31	5.05723	This study
D-12361	S3D1	highland	Peru	35192827	10.6	91.67	38.5	7.31	5.07763	This study
Javi	S1E3	lowland	Chile	35313370	10.6	91.83	38	7.31	5.14806	This study
Oro-de-Valle	S1D6	lowland	Unknown	35549594	10.7	92.01	38.59	7.38	4.81886	This study
CHEN-429	S4C2	highland	Peru	35647942	10.7	92.19	40.06	7.38	4.8486	This study
D-12363	S3E11	highland	Peru	35732132	10.7	91.7	39.56	7.38	4.94682	This study
PI-614934	S4G5	highland	Bolivia	35710381	10.7	92.6	39.47	7.38	5.13918	This study
PI-634925	S2H3	lowland	Chile	35922521	10.8	92.09	40.25	7.45	3.91493	This study
CHEN-384	S4G10	highland	Peru	35922341	10.8	91.56	41.78	7.45	4.22329	This study
BO-17	S4B8	lowland	Chile	36033084	10.8	92.39	41.98	7.45	4.82871	This study
D-12167	S1C7	highland	Peru	36096918	10.8	92	38.76	7.45	4.94355	This study
D-11953	S4A9	highland	Peru	36044560	10.8	92	41	7.45	5.01038	This study
CHEN-109	S4A8	highland	Peru	36082616	10.8	92.22	41.12	7.45	5.18856	This study
CHEN-291	S1E5	highland	Peru	36419740	10.9	92.66	38.79	7.52	4.88895	This study
D-10005	S2B7	highland	Peru	36188075	10.9	92.5	40.95	7.52	4.95014	This study
Ames-13743	S1B8	lowland	Chile	36227434	10.9	92.12	38.48	7.52	4.99305	This study
Nde-09	S4G8	lowland	Chile	36226377	10.9	90.09	39.57	7.52	5.00678	This study
CHEN-411	S3F2	highland	Peru	36430968	10.9	91.35	38.54	7.52	5.06967	This study
BO-58	S1A8	lowland	Chile	36448019	10.9	91.87	37.91	7.52	5.14739	This study
D-12424	S3D7	highland	Bolivia	36421489	10.9	91.88	38.64	7.52	5.32472	This study
CHEN-430	S3D3	highland	Peru	36223780	10.9	91.67	38.52	7.52	5.47805	This study
Ames-13742	S4F8	lowland	United States	36685343	11	91.94	39.41	7.59	4.9233	This study
EMBRAPA-Brazil	S4A7	lowland	Unknown	36502915	11	92.43	39.96	7.59	4.95346	This study
CHEN-330	S4E6	highland	Peru	36765999	11	92.73	39.63	7.59	5.01397	This study
Kamiri	S4D10	highland	Unknown	36713474	11	92.97	40.8	7.59	5.1099	This study
ICBA-Q5	S1C1	lowland	Unknown	36831452	11	91.72	38.32	7.59	5.2848	This study
PI-634918	S3E5	lowland	Chile	36675016	11	91.81	39.59	7.59	5.34538	This study
D-12346	S4B10	highland	Bolivia	36890982	11.1	92.65	39.77	7.66	4.61055	This study
BO-32	S2B2	lowland	Chile	37108397	11.1	92.09	42.19	7.66	4.68047	This study
CHEN-390	S4D2	highland	Peru	36836937	11.1	91.71	40.31	7.66	4.80861	This study
CICA-127	S3H10	highland	Unknown	36838727	11.1	91.28	39.62	7.66	4.86115	This study
PI-614881	S4F10	highland	Argentina	36940463	11.1	92.12	40.91	7.66	4.94343	This study
D-12037	S1F8	highland	Bolivia	37041064	11.1	91.85	38.64	7.66	5.01048	This study
CHEN-69	S4C6	highland	Peru	37009829	11.1	92.22	39.09	7.66	5.11149	This study
D-12268	S3C7	highland	Peru	36874028	11.1	91.28	38.12	7.66	5.14592	This study
D-12309	S3E3	highland	Peru	37003721	11.1	91.36	38.3	7.66	5.24345	This study
Redhead	S2D3	lowland	Unknown	37182980	11.2	92.03	41.2	7.72	4.37222	This study
CHEN-205	S2B5	highland	Peru	37202060	11.2	92.26	39.83	7.72	5.07093	This study
D-12211	S1C4	highland	Peru	37354271	11.2	91.97	38.61	7.72	5.10391	This study
D-12282	S4C8	lowland	Argentina	37441010	11.2	92.3	39.05	7.72	5.1152	This study
PI-674266	S3G6	lowland	Ecuador	37297703	11.2	91.34	38.36	7.72	5.1358	This study
PI-510546	S4C5	highland	Peru	37321338	11.2	92.23	39.58	7.72	5.1635	This study
Ames-13744	S1A6	lowland	United States	37271500	11.2	90.59	38.45	7.72	5.24276	This study
CHEN-427	S3H8	highland	Peru	37288485	11.2	91.48	38.52	7.72	5.29551	This study
D-12431	S3G1	highland	Bolivia	37264418	11.2	91.07	38.07	7.72	5.39198	This study
D-12021	S3C2	highland	Peru	37482097	11.2	91.31	38.16	7.72	5.426	This study
D-12184	S1G11	highland	Peru	37220537	11.2	90.83	38.8	7.72	5.49079	This study
CHEN-212	S4B2	highland	Peru	37719227	11.3	91.9	39.67	7.79	4.77206	This study
Ames-13728	S2C3	lowland	United States	37505956	11.3	91.66	39.8	7.79	4.83377	This study
NSL-86628	S1A5	lowland	Unknown	37657208	11.3	92.06	38.99	7.79	4.87201	This study
CHEN-159	S2C4	highland	Bolivia	37813599	11.3	92.22	39.88	7.79	5.13144	This study
CHEN-406	S3E1	highland	Peru	37541762	11.3	91.2	38.15	7.79	5.17195	This study
PI-614915	S4D5	highland	Bolivia	37754569	11.3	92.22	39.37	7.79	5.20222	This study
D-12087	S1D8	highland	Peru	37779470	11.3	92	39.02	7.79	5.2352	This study
D-12354	S2F10	highland	Peru	37538436	11.3	91.57	39.86	7.79	5.24171	This study
Bouchane-3	S1E1	lowland	Unknown	37638892	11.3	92.22	38.76	7.79	5.26246	This study
BO-40	S1H6	lowland	Chile	37603035	11.3	91.75	38.42	7.79	5.2768	This study
CHEN-470	S1F5	highland	Peru	37535183	11.3	91.83	38.56	7.79	5.32283	This study
Ratuqui	S3D11	highland	Unknown	38132268	11.4	91.65	40.55	7.86	4.92685	This study
CHEN-151	S4A1	highland	Bolivia	37848597	11.4	90.02	39.87	7.86	5.05149	This study
CHEN-339	S4G1	highland	Peru	38037072	11.4	91.28	40.86	7.86	5.22144	This study
CHEN-112	S4F4	highland	Peru	37877351	11.4	92.17	39.5	7.86	5.25404	This study
03-21-072RM	S3H3	highland	Peru	37886777	11.4	90.88	38.86	7.86	5.3372	This study
PI-587173	S4F5	highland	Argentina	37944510	11.4	92.36	39.58	7.86	5.39716	This study
D-12123	S3B1	lowland	Peru	38428842	11.5	91.06	38.67	7.93	5.10534	This study
CHEN-361	S2H9	highland	Peru	38240701	11.5	91.73	40.11	7.93	5.22322	This study
Ames-13745	S1E6	lowland	United States	38322966	11.5	92.28	38.66	7.93	5.48072	This study
D-12353	S3F6	highland	Peru	38798062	11.6	91.44	38.7	8	4.83006	This study
CHEN-412	S4C3	highland	Peru	38831681	11.6	91.57	39.45	8	5.08552	This study
Ames-13732	S3F1	lowland	United States	38514194	11.6	91.3	38.44	8	5.21623	This study
D-12362	S4D6	highland	Peru	38737562	11.6	92.38	39	8	5.25749	This study
Titicaca	S4B6	lowland	Denmark	38765519	11.6	92.09	38.59	8	5.31675	This study
CHEN-350	S4G4	highland	Peru	38733599	11.6	92.21	39.51	8	5.42487	This study
PI-614889	S1D1	lowland	Chile	38746201	11.6	91.99	39.06	8	5.43539	This study
PI-510537	S4A5	highland	Peru	38618353	11.6	92.41	39.38	8	5.55524	This study
CHEN-297	S3E7	highland	Peru	38789918	11.6	91.82	38.75	8	5.78841	This study
BO-42	S2E11	lowland	Chile	39035662	11.7	92.04	40.78	8.07	5.07824	This study
Ames-13721	S1F6	lowland	United States	38838488	11.7	91.94	38.5	8.07	5.28312	This study
Kancolla	S3C6	highland	Unknown	39059735	11.7	91.11	38.13	8.07	5.29386	This study
D-12222	S4D7	highland	Peru	39128612	11.7	92.38	39.05	8.07	5.45016	This study
CHEN-5	S1D4	lowland	Unknown	38967283	11.7	90.1	39.09	8.07	5.66153	This study
Ames-13755	S2E4	lowland	United States	39190426	11.8	92.69	40.65	8.14	4.71353	This study
Ames-13758	S2A7	lowland	United States	39466348	11.8	92.05	40.45	8.14	4.75925	This study
Ames-13754	S2G4	lowland	United States	39219934	11.8	92.07	40.11	8.14	4.91732	This study
CHEN-110	S4G3	highland	Peru	39261843	11.8	91.42	40.51	8.14	4.99433	This study
D-10003	S3F10	highland	Peru	39330016	11.8	91.58	39.48	8.14	5.02645	This study
PI-584524	S1B9	lowland	Chile	39401868	11.8	91.75	39.23	8.14	5.09025	This study
D-12279	S3A5	highland	Unknown	39231667	11.8	91.92	38.16	8.14	5.13414	This study
PI-614882	S4D9	lowland	Chile	39387324	11.8	92.18	39.78	8.14	5.16429	This study
D-12079	S2B3	highland	Peru	39232965	11.8	91.97	39.84	8.14	5.18486	This study
CHEN-225	S2G11	highland	Peru	39440852	11.8	91.25	40.3	8.14	5.33338	This study
Ames-13735	S1B6	lowland	United States	39417964	11.8	91.78	38.46	8.14	5.57189	This study
CHEN-7	S3C1	lowland	Switzerland	39178026	11.8	91.4	38.39	8.14	5.804	This study
E-DK-4	S1D3	lowland	Unknown	39454294	11.8	91.65	38.12	8.14	5.9264	This study
CHEN-319	S2H4	highland	Peru	39783756	11.9	92.49	39.99	8.21	5.14281	This study
Ames-13757	S3D5	lowland	United States	39804652	11.9	91.99	38.35	8.21	5.55984	This study
PI-665276	S1H2	highland	Bolivia	39504840	11.9	91.88	38.28	8.21	5.69913	This study
CHEN-424	S1F4	highland	Peru	39715762	11.9	91.93	38.67	8.21	5.92263	This study
D-12119	S2E3	highland	Peru	39863150	12	92.25	41.72	8.28	4.78908	This study
D-12289	S2H6	highland	Peru	40027346	12	92.34	40.41	8.28	4.97218	This study
CHEN-383	S4C1	highland	Peru	39865540	12	91.82	40.37	8.28	5.10327	This study
D-9985	S4F6	highland	Unknown	40154052	12	92.09	39.77	8.28	5.11964	This study
CHEN-218	S2F2	highland	Peru	40133897	12	92.07	39.66	8.28	5.17609	This study
ICBA-Q3	S3H7	highland	Unknown	39946517	12	91.21	38.56	8.28	5.19168	This study
BO-03	S2G2	lowland	Chile	40007876	12	92.26	40.01	8.28	5.20274	This study
D-11965	S2E10	highland	Peru	40087752	12	92.81	39.92	8.28	5.33687	This study
PI-614927	S1B1	lowland	Bolivia	39951376	12	91.77	38.73	8.28	5.44999	This study
Ames-13733	S2D9	lowland	United States	40094277	12	91.73	39.83	8.28	5.46406	This study
Ames-13722	S1C6	lowland	United States	39864240	12	91.03	38.04	8.28	5.58366	This study
BO-51	S2G10	lowland	Chile	39926182	12	91.56	39.62	8.28	5.61142	This study
Ames-13730	S1C8	lowland	United States	39981364	12	91.6	37.84	8.28	5.71802	This study
D-12243	S1C2	highland	Peru	39848975	12	91.59	38.15	8.28	5.86868	This study
PI-478408	S4C9	highland	Bolivia	40423554	12.1	92.06	40.45	8.34	4.85617	This study
D-12389	S4D3	highland	Peru	40452270	12.1	92.1	39.71	8.34	4.98877	This study
Ames-13727	S1G9	lowland	United States	40268815	12.1	91.14	38.52	8.34	5.00716	This study
CHEN-322	S4G9	highland	Peru	40339209	12.1	91.9	40.09	8.34	5.08855	This study
BO-63	S2F11	lowland	Chile	40356787	12.1	91.14	41.56	8.34	5.21002	This study
CHEN-141	S3H9	highland	Bolivia	40385657	12.1	90.72	38.31	8.34	5.23977	This study
CHEN-64	S2F3	lowland	Unknown	40217230	12.1	91.75	40.06	8.34	5.47733	This study
PI-614929	S2B6	highland	Bolivia	40290437	12.1	92.22	39.39	8.34	5.50777	This study
PI-614887	S1H5	lowland	Chile	40299572	12.1	91.93	38.48	8.34	5.5262	This study
Bouchane-2	S3B6	highland	Unknown	40315496	12.1	90.95	38.56	8.34	5.5371	This study
D-12181	S3G3	highland	Bolivia	40452665	12.1	91.2	38.67	8.34	5.60813	This study
D-11980	S1E2	highland	Peru	40326833	12.1	92.58	38.58	8.34	5.62761	This study
D-12176	S2H8	highland	Peru	40790319	12.2	92.43	40.2	8.41	5.39687	This study
CHEN-433	S4E3	highland	Peru	40748896	12.2	92.51	39.45	8.41	5.41834	This study
PI-614883	S2D5	lowland	Argentina	40663751	12.2	91.96	39.56	8.41	5.55792	This study
Ames-13734	S1B3	lowland	United States	40742072	12.2	91.64	38.61	8.41	5.64776	This study
CHEN-226	S2G5	highland	Bolivia	40858201	12.3	92.16	39.91	8.48	4.96077	This study
Ames-13731	S2A4	lowland	United States	41005145	12.3	91.97	40.05	8.48	5.08036	This study
D-12166	S2G8	highland	Bolivia	41002138	12.3	90.44	40.29	8.48	5.3466	This study
D-12416	S2A9	highland	Peru	41156472	12.3	91.48	42.12	8.48	5.55722	This study
CHEN-90	S1B5	highland	Peru	41052218	12.3	91.86	38.76	8.48	5.65224	This study
D-11924	S2C7	highland	Peru	41127386	12.3	92.22	39.66	8.48	5.65901	This study
PI-614888	S2G1	lowland	Chile	41026378	12.3	91.69	39.94	8.48	5.69264	This study
D-12196	S1F2	highland	Bolivia	41097178	12.3	91.96	38.6	8.48	5.7515	This study
D-12182	S4F2	highland	Peru	41221334	12.4	92.05	39.97	8.55	5.44253	This study
Vikinga	S1E9	lowland	Denmark	41238956	12.4	91.62	38.45	8.55	5.61182	This study
D-12357	S1D7	highland	Peru	41219240	12.4	91.8	38.75	8.55	5.72861	This study
CHEN-349	S1A2	highland	Peru	41186126	12.4	91.5	38.5	8.55	5.87866	This study
D-12201	S4E9	highland	Peru	41597920	12.5	92.51	40.17	8.62	4.85843	This study
PI-614884	S2H7	highland	Unknown	41594474	12.5	92.67	40.42	8.62	4.94703	This study
CHEN-199	S3D8	highland	Bolivia	41820747	12.5	92.19	41.77	8.62	5.40274	This study
PI-510551	S4E5	highland	Peru	41738018	12.5	93.04	39.97	8.62	5.75752	This study
CHEN-401	S4E4	highland	Peru	41799328	12.5	92.8	39.16	8.62	5.77521	This study
D-12177	S3A7	lowland	Peru	41620042	12.5	91.44	37.99	8.62	5.80272	This study
Moroccan Yellow	S1F1	lowland	Unknown	41687436	12.5	91.78	38.66	8.62	5.95316	This study
Salcedo-Inia	S3C8	highland	Peru	42082291	12.6	91.54	38.56	8.69	5.40654	This study
D-11943	S2B9	highland	Peru	41956120	12.6	91.62	40.29	8.69	5.54256	This study
PI-665277	S4E8	highland	Bolivia	42119294	12.6	92.58	39.2	8.69	5.62091	This study
D-12387	S2C5	highland	Peru	41961629	12.6	92	39.53	8.69	5.78239	This study
D-12397	S2D11	highland	Peru	42130714	12.6	92.19	39.45	8.69	5.79053	This study
PI584524	S2F4	lowland	Unknown	42487244	12.7	92.15	39.66	8.76	5.49567	This study
D-12409	S2D10	highland	Bolivia	42229642	12.7	92.04	39.71	8.76	5.63487	This study
CHEN-220	S2B10	highland	Bolivia	42278305	12.7	92.27	39.31	8.76	5.98297	This study
Ames-13750	S2D4	lowland	United States	42268927	12.7	90.24	39.58	8.76	6.00662	This study
D-12420	S1A3	highland	Bolivia	42494875	12.7	91.08	39.24	8.76	6.23664	This study
Ames-13751	S2C6	lowland	United States	42741199	12.8	92.03	39.42	8.83	5.59556	This study
Ames-13753	S1G6	lowland	United States	42628064	12.8	91.25	37.87	8.83	6.20417	This study
D-12205	S1C3	highland	Peru	42627687	12.8	91.19	38.58	8.83	6.39326	This study
PI-634923	S2F1	lowland	Chile	43097350	12.9	91.66	39.8	8.9	5.67833	This study
RU-5	S1D5	lowland	United Kingdom	43017171	12.9	91.68	38.45	8.9	6.27597	This study
D-11918	S4F3	highland	Peru	43364573	13	91.15	40.41	8.97	5.69502	This study
PI-614920	S4F9	highland	Bolivia	43347580	13	91.94	40.22	8.97	5.76908	This study
CHEN-298	S1G2	highland	Peru	43446351	13	92.17	38.86	8.97	6.01458	This study
CHEN-354	S3F3	highland	Peru	43208076	13	90.72	38.23	8.97	6.2948	This study
CHEN-162	S2A8	highland	Bolivia	43645221	13.1	91.97	40.3	9.03	5.71046	This study
Ames-13761	S2G6	lowland	United States	43610369	13.1	91.77	40.33	9.03	5.74916	This study
D-12256	S3E9	highland	Peru	43581934	13.1	91.4	38.91	9.03	5.82762	This study
NSL-91567	S2A6	lowland	Unknown	43679006	13.1	91.04	39.73	9.03	5.87035	This study
CHEN-437	S2E9	highland	Peru	43605825	13.1	92.14	40.12	9.03	5.8815	This study
Brightest-Brilliant-Rainbow	S1G5	lowland	Unknown	43561626	13.1	91.84	38.5	9.03	5.97602	This study
BO-55	S1G1	lowland	Chile	44078951	13.2	91.77	38.66	9.1	6.22014	This study
RU-2	S4D8	lowland	United Kingdom	44223607	13.3	92	39.24	9.17	5.8675	This study
D-9992	S3F7	highland	Unknown	44449238	13.3	91.64	38.68	9.17	6.4235	This study
D-12220	S1H4	highland	Peru	44462194	13.3	91.84	38.48	9.17	6.49389	This study
D-11985	S3E6	lowland	Peru	44531414	13.4	91.42	38.33	9.24	5.89673	This study
Ames19047	S1H1	lowland	Unknown	44634831	13.4	91.77	38.77	9.24	6.30608	This study
D-12120	S3B3	highland	Peru	44549926	13.4	90.99	38.3	9.24	6.63941	This study
D-12345	S1G4	highland	Peru	44979054	13.5	91.75	38.34	9.31	6.71745	This study
PI-596498	S2F7	highland	Peru	45302340	13.6	92.32	39.64	9.38	5.91734	This study
CHEN-420	S1H3	highland	Peru	45314383	13.6	91.59	38.32	9.38	6.70235	This study
Bouchane-4	S2E5	lowland	Unknown	45624790	13.7	92.61	41.23	9.45	5.43653	This study
CHEN-219	S2G9	highland	Bolivia	45639029	13.7	91.41	40.4	9.45	5.86101	This study
D-12350	S3C5	highland	Peru	45530874	13.7	91.62	38.39	9.45	6.20454	This study
CHEN-302	S3G5	highland	Peru	45697373	13.7	91.54	38.47	9.45	6.57225	This study
Ames-13748	S2H5	lowland	United States	46128368	13.8	92.44	39.92	9.52	5.80106	This study
D-12114	S3D9	highland	Peru	46032998	13.8	91.52	38.8	9.52	6.2332	This study
D-11889	S2C10	lowland	Argentina	46122964	13.8	91.96	39.4	9.52	6.35227	This study
Baer-II	S1G3	lowland	Unknown	46150775	13.8	91.47	38.5	9.52	6.7889	This study
CHEN-299	S3B9	highland	Peru	46324108	13.9	90.79	38.34	9.59	5.97653	This study
CHEN-400	S4B5	highland	Peru	46572895	14	92.23	39.42	9.66	6.14786	This study
BO-46-2	S2D1	lowland	Chile	47117159	14.1	91.99	39.75	9.72	6.15356	This study
PI-634919	S2H11	lowland	Chile	47105884	14.1	92.06	40.25	9.72	6.24962	This study
CHEN-256	S2A5	highland	Peru	46842701	14.1	92.17	39.66	9.72	6.26667	This study
CHEN-342	S2E7	highland	Peru	48235261	14.5	92.7	40.41	10	5.8736	This study
CHEN-416	S3F5	highland	Peru	48984232	14.7	91.72	38.73	10.14	6.66528	This study
BO-16	S1A9	lowland	Chile	50333544	15.1	91.1	38.53	10.41	6.94203	This study
D-12329	S3G9	highland	Bolivia	51059499	15.3	91.33	39.09	10.55	6.78026	This study
D-12179	S4E2	highland	Peru	51688443	15.5	91.71	40.2	10.69	6.71913	This study
CHEN-91	S2B8	highland	Peru	61408985	18.4	92.28	39.8	12.69	8.31489	This study
CHEN-155	S3C3	highland	Bolivia	70268870	21.1	91.28	39.4	14.55	9.04814	This study
C. berliandieri boscianum	10179	n.a	Unknown	_	_	_	_	_	4.46596	Javis et al., 2017
Ames	10191	lowland	Unknown	_	_	_	_	_	4.7981	Javis et al., 2017
C. berliandieri macro	10180	n.a	Unknown	_	_	_	_	_	4.94779	Javis et al., 2017
C.hircinum BYU 566	10177	n.a	Unknown	_	_	_	_	_	5.12246	Javis et al., 2017
C. berliandieri zschacker	10186	n.a	Unknown	_	_	_	_	_	5.21902	Javis et al., 2017
Salcedo	10183	highland	Unknown	_	_	_	_	_	5.2632	Javis et al., 2017
C. berliandieri nuttaliae	10187	n.a	Unknown	_	_	_	_	_	5.50974	Javis et al., 2017
LP.Q2 quinoa (kurmi)	10178	highland	Unknown	_	_	_	_	_	5.63379	Javis et al., 2017
C.hircinum BYU 1101	10185	n.a	Unknown	_	_	_	_	_	5.64194	Javis et al., 2017
CICA	10181	highland	Peru	_	_	_	_	_	6.0711	Javis et al., 2017
Pasankalla	10176	highland	Unknown	_	_	_	_	_	6.35057	Javis et al., 2017
G-200-Q3 quinoa	10184	lowland	Unknown	_	_	_	_	_	6.84202	Javis et al., 2017
Ku-2-Q5	10190	lowland	Unknown	_	_	_	_	_	7.49573	Javis et al., 2017
C. berliandieri sinuatum	10192	n.a	Unknown	_	_	_	_	_	8.65566	Javis et al., 2017

## Sheet: Supplementary file 1b
Table S2: Summary of high-quality SNPs identified in quinoa accessions
sample	No. of Referenece Homozygous	DP Ref. Homozygous	GQ Ref. Homozygous	No of non Referenece Homozygous	DP Alt. Homozygous	GQ Alt. Homozygous	Number of Heterozygous	DP Heterozygous	GQ Heterozygous	No of Transitions	No of Transversions	No of Missing
S4C4	942174	5.2927	15.0132	494515	5.67797	15.6264	243170	6.86385	51.7198	450080	287605	1233211
S2B4	975855	5.27858	14.6579	547415	5.46399	15.1278	162505	7.15845	54.6381	432930	276990	1227295
S3E10	996087	5.92976	16.944	525655	6.45273	17.5889	186195	8.0901	57.6074	443697	268153	1205133
S2A10	1020835	5.7327	16.3187	579112	5.89143	16.7538	248327	7.67433	54.266	509423	318016	1064796
S4H1	1039537	5.7918	16.4052	650576	5.91601	16.9314	246634	7.64942	55.8631	550272	346938	976323
S4H5	1043088	5.855	16.418	577832	5.96789	16.8041	256957	7.94958	55.8199	512406	322383	1035193
S1B4	1047916	5.30484	14.7095	618358	5.57381	15.226	159700	7.16703	57.6003	472777	305281	1087096
S4H11	1054337	5.8482	16.5312	581367	6.07625	16.9974	213337	8.23698	58.1444	489333	305371	1064029
S4B4	1058040	5.36607	14.8647	613087	5.5357	15.3474	170714	7.20857	55.537	477823	305978	1071229
S4E11	1076251	6.31502	17.8401	733132	6.57623	18.2315	255880	8.80589	58.9281	606887	382125	847807
S2A1	1081428	6.35603	17.9865	687488	6.57199	18.2351	300263	8.55651	56.1956	608319	379432	843891
S4G7	1125398	6.25339	17.5863	688905	6.53412	17.9245	402679	8.05871	56.8848	670104	421480	696088
S3B4	1132834	5.64744	16.0026	761959	5.89163	16.5822	215214	7.85331	60.9593	596270	380903	803063
S4A2	1139042	6.36317	17.9459	651342	6.66122	18.2472	442833	8.1987	57.6201	670946	423229	679853
S2B3	1151078	7.54921	21.0652	628326	7.77653	21.0533	800509	9.07482	62.6479	872549	556286	333157
S4D1	1153921	5.99605	16.9546	741133	6.26138	17.4471	261955	8.1487	57.8344	614710	388378	756061
S3E8	1173578	6.76456	19.1695	803898	7.23717	19.7001	276700	9.35636	60.536	664412	416186	658894
S4E1	1177061	6.23721	17.6592	719940	6.38073	18.0909	274375	8.52698	57.9882	608928	385387	741694
S3F8	1178125	5.81914	16.4709	737217	6.17261	17.0423	246105	8.0852	60.3753	599538	383784	751623
S2E9	1188888	8.23798	22.9835	652140	8.49742	23.199	844626	9.83424	65.5234	914301	582465	227416
S4H6	1189290	6.198	17.4252	736249	6.35127	17.8934	374801	8.06964	59.4242	678067	432983	612730
S3B3	1191455	9.22455	25.6945	699407	9.32606	26.2233	897455	10.6363	73.0948	974784	622078	124753
S4A3	1192160	6.26866	17.672	726626	6.66987	18.1092	284254	8.35576	57.4677	620947	389933	710030
S4E7	1193445	6.57048	18.4203	800266	6.95875	18.9114	312571	8.97378	58.4828	682164	430673	606788
S3G1	1194577	7.64499	21.4145	591131	7.83997	21.8173	863778	8.97907	68.2429	887444	567465	263584
S3F10	1200589	7.37762	20.7156	589880	7.67767	21.2088	780845	8.83098	65.1246	837622	533103	341756
S3A8	1203449	6.06905	17.1566	827103	6.34291	17.8095	253352	8.4164	61.6602	658575	421880	629166
S4H10	1208709	6.47265	18.1629	811345	6.61132	18.6772	298837	8.79228	58.8402	679248	430934	594179
S4A10	1210149	6.05966	17.1479	666294	6.24434	17.603	245099	8.41357	58.0886	557719	353674	791528
S4C3	1210466	7.38726	20.6171	629494	7.68466	20.8568	755796	8.81611	65.0222	846279	539011	317314
S4D11	1218455	6.42981	18.1358	832915	6.49771	18.7084	275433	8.97488	60.8644	680090	428258	586267
S4H8	1221193	6.85251	19.2343	791273	6.94696	19.5993	322497	9.35899	57.5233	683321	430449	578107
S4C6	1226276	7.39715	20.6988	607318	7.81622	20.9733	771122	8.78299	64.6738	842164	536276	308354
S2D8	1240231	6.77329	19.1152	791520	6.90785	19.3774	377158	9.03618	56.5893	714187	454491	504161
S2C2	1241243	7.07666	19.9859	804094	7.40112	20.3343	321993	9.73744	59.3156	691939	434148	545740
S2H2	1242136	6.53137	18.4829	702050	6.87746	18.848	304824	8.87249	58.3271	618468	388406	664060
S3C4	1247181	7.3532	20.5664	632765	7.59183	20.9957	737215	8.74339	67.7968	836603	533377	295909
S4F1	1253493	6.66823	18.8516	693462	6.84776	19.2916	274243	9.2903	59.0544	595571	372134	691872
S4B1	1256693	6.51195	18.3742	778362	6.82034	18.8239	337040	8.73774	59.6762	682491	432911	540975
S2C9	1257974	7.09025	19.9662	734719	7.37934	20.3777	382845	9.2862	59.1236	686342	431222	537532
S2G3	1260164	6.8581	19.3179	840720	7.18698	19.6824	337273	9.37671	59.0389	719316	458677	474913
S2B5	1260426	7.36921	20.6925	828390	7.54984	20.8748	442139	9.76512	58.5476	775090	495439	382115
S2E3	1263237	7.39445	20.8184	841643	7.75587	21.0868	355434	9.93508	57.9714	734461	462616	452756
S1H10	1264787	6.68962	18.826	873525	6.9458	19.319	299437	9.1053	61.567	714599	458363	475321
S2C4	1267907	7.5788	21.2588	721193	7.83685	21.472	601485	9.35214	62.1395	809253	513425	322485
S4D10	1268106	7.44221	20.7669	780305	7.81655	21.207	449520	9.85893	63.1908	754346	475479	415139
S4A9	1269399	7.46786	20.9607	868929	7.62044	21.2696	366584	10.2263	60.8466	756164	479349	408158
S4G10	1273256	6.42861	18.0858	783118	6.7695	18.7286	281110	8.92332	59.5773	652909	411319	575586
S4G6	1276239	6.58684	18.563	815271	6.883	19.1181	349695	8.77242	60.4063	713208	451758	471865
S4G2	1279207	6.89961	19.3625	800039	7.16146	19.811	445092	8.78068	61.9885	760685	484446	388732
S3A3	1280623	6.92636	19.5589	888844	7.11135	20.1538	297268	9.45463	61.8946	722660	463452	446335
S1A10	1282748	6.80957	19.1301	887775	6.89717	19.6536	308642	9.37908	62.7618	729295	467122	433905
S2B9	1284342	7.8404	21.9343	830404	7.98861	22.3289	526791	10.0417	63.2859	829656	527539	271533
S1H8	1284460	6.30533	17.7993	766049	6.61677	18.243	308866	8.43617	58.6794	655641	419274	553695
S3C2	1288243	7.74267	21.7602	843973	7.88733	22.3938	534771	9.67927	68.2336	842034	536710	246083
S4D4	1288356	7.2662	20.2407	784502	7.34537	20.4115	481901	9.38516	56.4739	774376	492027	358311
S4H2	1289050	6.59476	18.4795	840300	6.63821	18.9482	324565	8.82652	60.1399	712475	452390	459155
S4E9	1291526	7.26759	20.3737	902618	7.6343	20.9524	329031	9.95336	61.3459	752906	478743	389895
S3D8	1291988	7.96622	22.4547	910983	8.28313	22.9304	356704	10.7852	62.7968	777690	489997	353395
S2H6	1294872	7.48906	21.0382	842866	7.77358	21.2215	391601	9.83903	56.7139	754289	480178	383731
S3B5	1297429	6.72239	18.9628	879071	6.9186	19.5343	286533	9.50655	62.5306	710761	454843	450037
S4H4	1298280	7.17522	19.9688	750309	7.23187	20.3931	491537	9.09973	60.0865	758925	482921	372944
S1H3	1298823	9.18455	25.5033	769185	9.41802	25.7468	718952	10.9002	68.9939	908239	579898	126110
S3C10	1298829	7.09953	19.9969	915763	7.37905	20.6043	321854	9.88268	63.9275	755818	481799	376624
S1E8	1299393	6.79389	19.1635	876891	7.06988	19.708	314599	9.29723	60.115	726985	464505	422187
S3D10	1303483	6.8656	19.4342	733749	7.31439	20.0085	265724	9.63165	60.5807	613442	386031	610114
S1D2	1303939	7.29647	20.4545	808216	7.49509	20.6677	445023	9.43224	57.1694	764128	489111	355892
S3F6	1305808	7.01314	19.6337	903873	7.47847	20.2293	324582	9.58939	61.516	749156	479299	378807
S4A4	1306866	7.22356	20.2824	852195	7.45435	20.5997	382708	9.84039	58.6446	753920	480983	371301
S2G11	1308483	7.82277	21.9199	793279	7.87716	22.0319	484048	10.0682	62.0719	782715	494612	327260
S2A9	1309930	8.22881	23.1443	909771	8.44112	23.54	364849	11.0826	62.0029	781773	492847	328520
S4B2	1310734	7.06358	19.8731	872658	7.1089	20.2894	330603	9.64183	60.0013	736330	466931	399075
S3H10	1310996	7.07631	19.9274	862122	7.24889	20.5275	341210	9.61635	63.581	734619	468713	398742
S4D3	1312738	7.24561	20.3333	895541	7.52773	20.85	352053	9.84121	60.1654	763640	483954	352738
S1H11	1314086	7.29732	20.5291	899123	7.48874	21.0247	322429	9.83018	62.5717	745999	475553	377432
S1F4	1318428	8.09096	22.5202	878624	8.18196	22.7607	507109	10.5124	63.8275	845821	539912	208909
S3A5	1324158	7.40662	20.8107	887261	7.53329	21.3638	362537	9.83292	62.4246	762077	487721	339114
S4G9	1324585	7.52826	21.1473	909409	7.71898	21.6275	344083	10.197	61.1621	766608	486884	334993
S1E11	1324724	7.3241	20.5833	929178	7.58901	21.0848	314682	10.1115	63.4501	758308	485552	344486
S3A4	1325030	7.09762	20.0098	932145	7.3071	20.5842	314078	9.68015	63.5263	760019	486204	341817
S3D11	1326528	7.34669	20.7314	905704	7.6966	21.3444	307517	10.0868	63.1559	742913	470308	373321
S1C7	1327887	7.09185	19.8997	890205	7.31767	20.2526	346930	9.74144	59.7567	753710	483425	348048
S2H9	1332574	7.62847	21.4369	765484	7.72915	21.8744	505431	9.67996	63.5195	775995	494920	309581
S3E3	1332871	7.57697	21.2988	834310	7.82058	21.8542	460568	9.61797	65.0914	789415	505463	285321
S2F10	1332987	7.68375	21.5465	832049	7.83542	21.8927	459002	9.95633	60.9199	791315	499736	289032
S3C6	1335239	7.55418	21.1791	897402	7.84555	21.7473	415318	9.85314	65.8232	800676	512044	265111
S4C10	1335615	7.24784	20.4084	855829	7.44002	20.8493	347517	9.77758	59.5826	736091	467255	374109
S4G3	1337648	7.27257	20.4012	877237	7.3598	20.771	348517	9.78877	59.6588	750544	475210	349668
S1F5	1338217	7.54376	21.0966	770457	7.66466	21.4309	529664	9.50319	65.1992	792341	507780	274732
S4G1	1338277	7.4244	20.7618	783912	7.53112	21.1779	494097	9.43781	64.1854	782179	495830	296784
S2G8	1339626	7.74845	21.7709	887309	8.0977	22.0897	380580	10.3593	59.2235	775393	492496	305555
S4H3	1340468	6.56282	18.4605	743754	6.8602	19.0497	282428	8.9919	58.568	627711	398471	546420
S4C1	1342567	7.52043	21.0631	875021	7.84177	21.5555	352244	10.1073	60.5492	752115	475150	343238
S3A10	1343274	6.65432	18.8386	799769	6.91372	19.505	297463	9.13573	62.3519	669792	427440	472564
S4C5	1343919	7.49134	20.9861	913152	7.78094	21.4589	359410	10.1649	59.9283	777849	494713	296589
S1G2	1344755	8.24942	23.0174	754312	8.26612	23.1689	603485	10.3166	65.3654	829732	528065	210518
S3F2	1344766	7.353	20.6613	923720	7.47397	21.2547	335495	9.83512	65.6577	770415	488800	309089
S4A1	1346454	7.38703	20.7383	927522	7.567	21.2082	308628	10.2559	62.5917	754778	481372	330466
S3D6	1347377	6.94233	19.5812	886084	7.16918	20.1522	291952	9.62089	62.0305	720469	457567	387657
S2G9	1347673	8.38093	23.3445	709972	8.54287	23.3724	631502	10.4475	58.7925	821372	520102	223923
S3D1	1350333	7.35015	20.7318	946423	7.61312	21.3003	313391	10.1062	63.5646	768119	491695	302923
S4A5	1351932	7.86654	22.0301	949287	8.105	22.4143	361358	10.8271	62.4206	799615	511030	250493
S1C10	1352649	7.14222	20.1069	930678	7.37487	20.8113	310726	9.89823	62.7803	758269	483135	319017
S2B10	1356541	8.60148	24.0972	921405	8.67467	24.3003	433915	11.2402	60.9528	828155	527165	201209
S1C4	1357749	7.31876	20.5555	916778	7.60305	20.9946	329928	10.1353	62.2779	760647	486059	308615
S1F8	1357841	7.29892	20.5193	831766	7.44959	20.9345	400145	9.53944	63.3504	751359	480552	323318
S2E7	1359352	8.41715	23.5531	918429	8.70621	23.8493	396991	11.2769	60.2406	804784	510636	238298
S2F8	1361129	6.6068	18.6736	693751	6.87958	19.0446	324799	8.8993	57.6793	623492	395058	533391
S4D2	1362019	7.08073	19.8279	795495	7.28105	20.3039	382496	9.37557	61.4974	719615	458376	373060
S4E6	1362331	7.26021	20.3962	770175	7.52966	20.9818	448893	9.43336	63.7863	746860	472208	331671
S3E9	1364414	8.26414	23.1692	975662	8.51124	23.7469	354132	11.2668	65.8116	811749	518045	218862
S4E5	1364489	8.1001	22.7081	955361	8.33972	23.2725	359498	11.1314	62.8717	804089	510770	233722
S2D10	1366143	8.06406	22.5973	909382	8.2507	22.9705	405921	10.7222	58.6285	804682	510621	231624
S4F4	1367270	7.54605	21.1465	890574	7.80634	21.5393	375010	10.1491	58.4288	773612	491972	280216
S1F3	1367328	6.68986	18.8845	764729	6.91151	19.3956	302208	9.1297	59.8904	651194	415743	478805
S3F4	1367932	7.20026	20.2644	922089	7.37287	20.8611	282883	10.1262	64.4298	735653	469319	340166
S4D6	1367995	7.61781	21.3784	926084	7.99803	21.867	333991	10.3659	61.7561	769861	490214	285000
S4F7	1368208	6.76273	19.033	802819	6.94505	19.5312	292745	9.26791	59.5478	668751	426813	449298
S2C5	1368508	8.27187	23.1888	927497	8.43887	23.4279	397600	10.9864	59.8615	809150	515947	219465
S4B10	1368513	7.054	19.8552	800801	7.24485	20.2962	294160	9.68021	59.9995	669054	425907	449596
S2B7	1368768	7.08035	20.0445	754058	7.52206	20.7038	341096	9.7711	58.4621	670313	424841	449148
S3A9	1369907	6.83096	19.3201	795653	7.23542	19.9846	278722	9.52651	62.5247	654878	419497	468788
S3D3	1370130	7.80327	21.9105	873627	7.95157	22.4403	416444	10.1669	64.5855	787469	502602	252869
S3F5	1371259	9.14088	25.5712	924231	9.48403	26.1016	481450	11.6515	66.8936	858796	546885	136130
S4D7	1371397	7.76378	21.7082	940016	8.06104	22.2018	353400	10.5169	61.1119	789993	503423	248257
S1F2	1371619	7.9963	22.4079	970128	8.17487	22.8148	348714	11.1538	63.2851	805123	513719	222609
S4F2	1372427	7.78641	21.8718	935568	8.00371	22.4115	349834	10.5983	61.3476	786198	499204	255241
S3F3	1372574	8.78015	24.4924	933034	8.8197	24.8674	453001	11.4429	60.2224	846092	539943	154461
S2C7	1372596	8.09159	22.7003	924255	8.3374	23.0722	365853	10.9604	61.2418	788977	501131	250366
S3H3	1374089	7.68993	21.6059	924786	7.87482	22.1449	332641	10.427	61.9365	768221	489206	281554
S1F10	1374543	7.19531	20.2919	929652	7.58899	21.1023	301161	9.89976	63.1281	753563	477250	307714
S2F7	1375640	8.33241	23.322	920951	8.56535	23.5854	395578	11.2526	60.6074	804339	512190	220901
S3D9	1375899	8.76345	24.5266	1015832	9.03845	25.1448	349324	11.9657	65.7903	833453	531703	172015
S3G3	1375994	7.97642	22.4095	963487	8.2076	22.9474	340233	10.852	63.2496	796223	507497	233356
S3G8	1376347	6.76628	19.0463	820492	7.14117	19.6692	278455	9.43808	62.556	669207	429740	437776
S3D4	1376675	6.38065	18.0477	747170	6.57584	18.6477	255780	8.93059	61.8793	612177	390773	533445
10179	1377167	na	na	544976	na	na	120055	na	na	411038	253993	870872
S3C8	1377479	7.69657	21.6149	920954	7.89754	22.224	322969	10.5747	63.174	758791	485132	291668
S1D7	1378225	7.93139	22.1232	691640	8.06257	21.9982	631508	9.99422	54.8043	807303	515845	211697
S1F11	1381229	6.73818	18.9917	777381	7.02258	19.5254	266958	9.50772	62.477	637044	407295	487502
S1C2	1381922	8.12609	22.7415	934233	8.30674	23.0802	405818	10.7786	62.7827	816763	523288	191097
S2B6	1382562	7.92282	22.1865	832498	8.10762	22.3079	420587	10.5447	57.7033	765376	487709	277423
S1A2	1384090	8.05149	22.3836	949241	8.16761	22.8724	352992	11.2623	62.9554	794656	507577	226747
S2A5	1385349	8.82731	24.736	939854	9.0808	24.9622	409084	11.6689	61.7879	825108	523830	178783
S3B8	1385512	6.9034	19.4559	846083	7.07257	20.0866	259101	9.80606	64.61	673598	431586	422374
S2G5	1386530	7.31408	20.5623	770353	7.57145	20.8128	398573	9.63468	58.7629	715261	453665	357614
S4F6	1387389	7.43692	20.884	879826	7.62214	21.3983	319988	10.2226	61.7213	734301	465513	325867
S4C2	1389325	7.11323	20.0349	779531	7.36344	20.5673	379985	9.42953	60.9848	708807	450709	364229
S4E3	1390155	7.82411	21.9864	905210	7.97798	22.4223	342561	10.5749	60.5481	763240	484531	275144
S4B9	1390963	7.16178	20.1564	733167	7.32685	20.5131	285649	9.9822	59.5393	624289	394527	503291
S3C5	1392197	8.61627	24.0829	977500	8.66843	24.569	341031	11.849	64.7433	805637	512894	202342
S1G11	1392569	7.87023	22.0645	944661	7.94533	22.4963	328388	10.7996	63.1651	776673	496376	247452
S2H7	1394349	7.18326	20.1617	747853	7.46291	20.5563	325175	9.91811	59.2449	655981	417047	445693
S4C7	1398278	7.44825	20.9628	727841	7.82675	22.0769	327919	10.229	57.5081	650263	405497	459032
S2D7	1400939	6.90368	19.4261	737590	7.08747	19.7656	322145	9.37574	57.2351	649315	410420	452396
S4F3	1402416	7.93271	22.2125	939722	8.24285	22.7983	352138	10.7084	61.4343	790525	501335	218794
S4G5	1402770	7.50138	21.0729	839294	7.56965	21.429	342621	10.2101	60.877	721963	459952	328385
S3E11	1403232	7.21333	20.3498	811748	7.5212	20.9616	336400	9.73357	64.0498	702761	445387	361690
S3D7	1404546	7.59872	21.386	903075	7.77032	22.0317	336335	10.2506	64.1251	758560	480850	269114
S2H4	1404962	7.4682	20.9843	796071	7.84068	21.3346	371357	10.001	59.42	714660	452768	340680
S1E5	1405783	7.04032	19.7676	803583	7.21276	20.1136	332690	9.71772	60.5505	693187	443086	371014
S3E7	1407420	8.13325	22.8405	844059	8.18023	23.3625	443898	10.4099	65.5658	787748	500209	217693
S4C9	1407505	7.35152	20.6348	740134	7.66733	21.0074	366648	9.68861	56.4204	677887	428895	398783
S4A8	1412008	7.66639	21.5777	802877	7.84636	21.9114	344981	10.408	60.0493	701966	445892	353204
S4G4	1416289	7.75711	21.7123	834111	7.95602	22.0196	402318	10.2283	56.8498	756656	479773	260352
S3B6	1418509	7.71653	21.6672	935734	7.85634	22.4625	320538	10.5019	65.342	769043	487229	238289
S1A3	1419773	8.73626	24.4118	962709	8.98123	24.8038	373150	11.7811	63.2773	816899	518960	157438
S1C3	1424921	8.87228	24.7488	960101	9.00008	25.0529	383450	11.8839	62.4571	820795	522756	144598
S3F7	1425029	8.85735	24.8369	976470	9.05365	25.3967	355697	12.0137	64.2199	814204	517963	155874
S4E4	1425956	8.17786	22.8812	860244	8.30754	23.2863	403792	10.8253	60.8644	772722	491314	223078
S1H4	1427684	8.91833	24.9368	984515	9.11065	25.4551	360963	12.0389	63.6254	821083	524395	139908
10183	1434692	6.39477	17.57	871722	6.5683	19.0769	202577	10.6447	71.6852	657020	417279	404079
S1G4	1435968	9.22138	25.7425	972609	9.34485	26.0906	381959	12.2638	62.7042	827197	527371	122534
S1A7	1441951	7.07125	19.8806	795562	7.26202	20.2822	317928	9.778	61.2895	679024	434466	357629
S2H8	1443220	7.84291	22.0423	817600	8.05172	22.4358	354737	10.6537	60.6634	716552	455785	297513
S2F2	1446639	7.56944	21.281	812026	7.79728	21.6492	329005	10.4958	61.8978	697235	443796	325400
10180	1448310	na	na	576946	na	na	137110	na	na	440922	273134	750704
S3H8	1455339	7.54995	21.2808	871153	7.78344	21.949	292793	10.5096	65.0016	710690	453256	293785
10187	1457984	na	na	585129	na	na	137475	na	na	446804	275800	732482
10186	1458706	na	na	572965	na	na	141679	na	na	441870	272774	739720
S4D5	1462643	7.47863	21.0191	764255	7.67537	21.2268	384009	9.93586	56.6308	701578	446686	302163
S2E10	1463524	7.77743	21.9246	779077	8.09296	22.1933	360547	10.4585	58.903	697000	442624	309922
S4F9	1463641	8.17615	22.9334	881652	8.27961	23.5167	327319	11.3268	63.104	740331	468640	240458
S4B3	1463924	6.62332	18.726	420882	7.50118	19.2957	263634	8.98388	55.5357	421919	262597	764630
S3G9	1465939	9.36158	26.2143	955490	9.5197	26.9239	346603	12.722	66.4685	795824	506269	145038
S1H2	1474283	7.99094	22.3442	777388	8.12842	22.7989	438005	10.2296	65.4089	741226	474167	223394
S3H7	1474596	7.41253	20.8482	859274	7.69795	21.5997	282300	10.3439	64.1572	696375	445199	296900
S1D8	1477120	7.59215	21.343	812718	7.88508	21.8221	330278	10.2508	60.2221	697402	445594	292954
S3H9	1478215	7.43692	20.9388	841760	7.72696	21.6449	274383	10.4977	64.6684	679921	436222	318712
10176	1483797	7.45217	20.3354	940536	7.564	22.1686	220010	12.5865	73.2044	710302	450244	268727
S3C7	1484474	7.43234	20.8481	850051	7.60617	21.5698	283803	10.5005	64.5755	691090	442764	294742
S3E1	1487193	7.3957	20.8746	849469	7.58482	21.5089	283589	10.4025	64.7305	691095	441963	292819
S2A8	1491173	8.22066	23.1117	812311	8.42481	23.4776	342521	11.0855	60.5368	706512	448320	267065
S2D11	1492777	8.12019	22.7918	817716	8.40804	23.1083	369530	11.0711	60.889	724604	462642	233047
S1E2	1494645	7.91534	22.2347	852907	8.04568	22.6358	326553	11.0266	63.0848	719254	460206	238965
S3B9	1495480	8.49281	23.8194	916002	8.60378	24.4932	294023	11.7437	66.5238	738458	471567	207565
S1B5	1500857	7.9137	22.1883	823163	8.09276	22.505	348720	10.9108	61.5559	714886	456997	240330
S4B5	1502184	8.51048	23.8613	880186	8.72606	24.4364	347499	11.769	63.5891	750108	477577	183201
10178	1502812	6.74993	18.5612	834750	7.07717	20.2131	200420	11.5484	73.471	633023	402147	375088
S4F10	1506683	7.20133	20.2851	739328	7.34288	20.9872	278761	10.1093	61.4602	623601	394488	388298
S4E8	1508796	8.01647	22.4639	818455	8.19614	22.921	356083	10.7899	62.4309	718929	455609	229736
S3G4	1513107	5.13607	14.346	74857	7.60592	15.6254	155514	6.32722	55.5007	138994	91377	1169592
S3C3	1523486	12.2817	34.1422	911827	12.3925	34.883	423647	15.76	70.1846	816094	519380	54110
S4F5	1531650	7.72387	21.7272	791579	7.90612	22.2437	303447	10.6403	62.0697	669029	425997	286394
S2B8	1536331	11.3123	31.4686	896434	11.5156	31.8179	409585	14.8449	64.4927	798594	507425	70720
10181	1542113	7.08318	19.4109	873472	7.3252	21.1774	199814	12.2364	73.2679	655143	418143	297671
S3G5	1543524	9.06673	25.3529	847626	9.11763	25.8627	364244	12.1435	65.4841	740545	471325	157676
S2E4	1543939	7.09055	19.9681	150117	9.30367	18.9246	770054	8.34059	60.096	563022	357149	448960
S4E2	1547125	9.0811	25.3206	901171	9.27613	26.0453	337676	12.5325	64.0149	756683	482164	127098
10185	1557764	na	na	614793	na	na	160599	na	na	478656	296736	579914
10192	1640336	na	na	673869	na	na	178674	na	na	526532	326011	420191
S3B1	1654498	7.2024	20.3269	425003	7.99381	20.8834	508125	8.85053	66.6724	569770	363358	325444
S3H4	1682324	5.99248	17.109	323565	6.78919	17.8926	164614	8.57602	59.5892	296928	191251	742567
10177	1690471	na	na	595898	na	na	144624	na	na	453381	287141	482077
S1D11	1755239	6.98439	19.7703	426799	7.51221	20.3076	222098	9.69253	60.1819	395608	253289	508934
S2C3	1762045	7.14688	20.1756	416657	7.96067	20.6454	330011	9.33654	60.6722	454729	291939	404357
S1H7	1774093	6.2435	17.7397	365233	7.12838	18.4235	180316	8.72842	57.6698	331689	213860	593428
S1G10	1790273	6.88418	19.4164	429890	7.32272	19.9894	248323	9.51842	62.2849	411995	266218	444584
S2G4	1800633	7.17821	20.2959	435547	8.03513	20.7525	287951	9.59516	59.3385	439839	283659	388939
S2H5	1821958	8.17159	22.9845	517333	8.6538	23.4447	321092	10.8401	56.9597	513710	324715	252687
S3E5	1847131	7.38647	20.9784	520310	8.33041	21.8326	233336	10.3487	63.4215	460059	293587	312293
S2E1	1864190	6.60409	18.8058	220624	7.79434	19.5482	159964	9.20449	55.9568	232405	148183	668292
S2D9	1882775	7.81016	22.0434	471528	8.32745	22.5967	276136	10.6357	61.5529	456790	290874	282631
S2E6	1912173	6.76531	19.238	206849	8.11014	19.86	250177	8.8756	55.2799	279035	177991	543871
S4H9	1920010	6.24654	17.7543	137792	8.71688	19.2961	127903	8.776	54.5451	162050	103645	727365
S1E1	1942516	7.28728	20.5397	300251	8.32863	20.7513	345270	9.38466	60.9234	391377	254144	325033
10184	1953453	7.66325	21.0242	542197	8.1976	23.1628	247198	11.6031	76.8174	479747	309648	170222
S1G9	1961212	7.24015	20.4657	325820	7.89352	21.1989	266354	9.40306	62.9735	361404	230770	359684
S2H3	1963054	6.31654	18.0192	79169	9.32494	19.4935	121941	8.75095	54.1171	122538	78572	748906
S3C1	1977768	7.9528	22.4706	420703	8.76255	23.3558	282512	10.442	65.9727	429774	273441	232087
S2A7	1984045	6.89042	19.5048	199563	9.05811	20.4516	225028	9.36244	56.5097	258623	165968	504434
S2B2	2003918	7.12864	20.2178	161751	9.83906	21.3066	141594	10.4141	56.5264	185185	118160	605807
S2F5	2016941	6.3425	18.0317	139860	8.53797	19.3348	135166	9.14385	56.0708	166746	108280	621103
S1F9	2018986	6.65578	18.8	246666	7.8111	19.6845	141124	9.94265	61.8486	234884	152906	506294
S2D4	2019380	8.42077	23.7141	389270	9.13502	24.251	276437	11.1948	61.5203	406808	258899	227983
S1G7	2025472	5.85464	16.7132	77570	9.55476	18.8132	86748	9.00056	58.8361	99539	64779	723280
S4F11	2048301	6.49	18.5092	118921	9.06989	20.0416	129740	9.35004	58.9586	151125	97536	616108
S2D3	2049236	6.43948	18.2205	94222	11.4047	20.29	123018	9.88946	55.7265	131974	85266	646594
S4F8	2049782	7.07615	20.0579	323958	7.80017	20.8292	185171	10.0828	60.5622	310856	198273	354159
S2B1	2054820	6.87793	19.4199	218573	8.16108	20.229	174294	10.239	58.3647	239639	153228	465383
S1C8	2056777	7.94542	22.3975	336825	8.89699	22.8384	283089	10.2821	66.0667	376291	243623	236379
S1B6	2058737	7.77257	21.9437	307433	8.77748	22.3627	281616	10.2221	65.6915	356194	232855	265284
S2C6	2081520	7.8622	22.1538	216170	9.53277	22.8538	342691	10.006	61.9737	341238	217623	272689
S1F7	2101484	6.95939	19.7386	263899	7.8191	20.5283	155991	10.1441	60.6162	254116	165774	391696
S3H5	2101498	6.2225	17.7739	85393	10.7071	20.0945	94883	9.64859	57.788	109314	70962	631296
S1A8	2104126	7.31319	20.6995	171531	8.85796	21.6552	302364	9.24179	66.3996	288883	185012	335049
S4B7	2110671	6.68157	18.9416	106496	10.3708	20.6319	123651	9.90523	55.4338	139551	90596	572252
S4A7	2119503	7.29899	20.6664	221703	8.7736	21.4751	167452	10.1756	57.614	235289	153866	404412
S1B8	2127107	7.16485	20.3163	188207	8.80872	21.2759	212330	9.74314	64.3109	243644	156893	385426
10191	2129586	5.99564	16.7417	144551	7.42061	18.3909	72524	11.4	73.9672	132385	84690	566409
S1B3	2129900	7.78318	21.9447	251942	8.85913	22.6114	277479	10.2364	65.2721	321216	208205	253749
S4B8	2137011	7.09846	20.155	130166	9.00417	21.4215	120914	10.7806	57.3597	153783	97297	524979
S2E5	2138090	7.79477	22.0265	204607	9.3159	22.7659	224324	10.5861	56.2955	262928	166003	346049
S1G6	2138146	8.38823	23.6395	316304	9.36559	24.2155	276524	10.9498	66.9147	360723	232105	182096
S2D5	2162083	7.83264	22.0576	250538	9.10327	22.6447	208974	10.8488	57.0468	279381	180131	291475
S1E9	2166418	7.83163	22.1482	326878	8.88476	22.922	162108	11.365	63.3824	296049	192937	257666
S1F6	2166994	7.31441	20.6363	240266	8.65954	21.6775	163075	11.1469	63.6311	246030	157311	342735
S2F3	2167874	7.80266	22.0483	256830	9.24998	22.8039	169388	11.2085	61.0227	259243	166975	318978
S1C6	2168084	7.70108	21.7468	329330	8.5001	22.3327	170899	11.0583	62.3392	306210	194019	244757
S1D10	2172096	6.4808	18.4663	148858	8.5069	19.9343	113337	9.52688	60.4944	159758	102437	478779
S1C9	2189420	6.82536	19.3813	174372	8.81931	20.5778	114507	10.0834	61.7937	174404	114475	434771
S2G1	2197415	7.85502	22.1173	259117	9.19399	22.8423	169388	11.5082	61.1186	260905	167600	287150
S1G8	2202603	6.68447	18.9877	131814	9.31609	20.6034	103620	9.98743	60.9527	142517	92917	475033
S2F11	2206350	7.68592	21.8518	176722	9.90186	22.8729	134277	10.9465	60.455	188537	122462	395721
S1D4	2212367	7.88993	22.2354	268993	9.17874	22.9946	161234	11.4337	62.9861	261262	168965	270476
S1H9	2217397	6.85654	19.4941	146839	8.24997	20.6104	114021	10.3363	61.1204	158278	102582	434813
S1A5	2217864	6.79628	19.2032	124544	9.84319	20.8512	107900	11.3376	61.0281	140301	92143	462762
S2A4	2222928	7.11739	20.1171	113289	10.812	21.6403	143063	10.8408	55.808	155859	100493	433790
S2E11	2238793	7.36754	20.9523	145460	10.4129	22.3461	145440	10.5401	58.5232	177257	113643	383377
S4C8	2244152	7.29527	20.6614	174194	9.28292	21.7216	162336	10.3411	56.5141	203921	132609	332388
S2G10	2246509	7.90729	22.4087	216559	9.0094	22.8381	165566	11.0343	60.2604	230866	151259	284436
S4D9	2254346	7.47548	21.1775	155733	9.9651	22.5115	142423	10.8095	57.3893	181615	116541	360568
S3E4	2265987	7.21787	20.5021	175188	9.30394	21.6662	112863	10.5053	63.5747	173678	114373	359032
S1B9	2286260	7.17774	20.4547	143853	9.27614	21.9288	101099	11.2451	64.0189	148716	96236	381858
S2G6	2289411	8.10193	22.8917	170268	10.9323	23.878	186184	10.9675	58.4732	216332	140120	267207
S2G2	2308556	7.482	21.2681	141249	11.0913	22.6416	113193	11.0671	60.1663	153457	100985	350072
S1E4	2320635	7.10788	20.2004	119689	10.25	21.6758	110062	11.0535	60.6049	139085	90666	362684
S4G8	2333095	7.18668	20.3525	105865	10.7706	21.9804	116415	10.5124	55.9504	134932	87348	357695
S2F4	2333238	7.76527	22.0072	143367	10.6663	23.2982	140285	11.3936	58.0671	172208	111444	296180
S1H6	2336285	7.36535	20.8933	147760	9.68917	22.1532	114185	11.2974	61.7308	158084	103861	314840
S1D6	2336586	6.84196	19.4951	80954	11.2611	21.6598	84665	11.0055	61.9098	100035	65584	410865
S1E3	2340213	7.25219	20.5301	99878	9.24897	21.6574	143581	10.7942	62.9576	147475	95984	329398
S1F1	2342218	7.93864	22.3472	190673	10.2623	23.2751	147759	11.742	61.8854	205088	133344	232420
S3F1	2342541	7.30637	20.8021	134116	10.2494	22.4192	106792	11.2434	62.2163	145836	95072	329621
S2H11	2347585	8.68462	24.5664	188070	11.244	25.5588	154420	12.248	59.8546	207976	134514	222995
S1G3	2351815	9.00518	25.302	242577	10.5851	26.072	172033	12.9055	62.3056	252723	161887	146645
S1A6	2352575	7.37298	20.9202	128251	11.1794	22.4049	104176	11.2246	63.796	139940	92487	328068
S3G6	2357926	7.21952	20.4791	89332	10.7015	22.6378	113135	11.0814	60.6158	123443	79024	352677
S4B6	2358058	7.47524	21.2245	126375	10.0111	22.5915	120033	11.2316	59.863	148616	97792	308604
S3D5	2359014	7.7393	21.9461	147753	10.1803	23.35	135456	11.1215	59.6507	171508	111701	270847
S3A7	2363219	7.96111	22.4597	142977	10.7802	23.4729	173035	10.7472	56.1684	191895	124117	233839
S1B1	2364353	7.3966	20.9216	122137	11.3077	22.2731	114961	11.5658	62.592	142892	94206	311619
S3A6	2367180	7.20258	20.5045	83558	11.6383	22.8912	98955	10.845	61.3892	110673	71840	363377
S1H5	2380831	7.58802	21.4491	135375	10.9653	22.942	126622	11.6386	60.1632	158580	103417	270242
S1E6	2385417	7.48523	21.2415	132266	10.6868	22.6279	108834	11.6606	63.6119	145346	95754	286553
S3E6	2388886	8.01013	22.729	173302	10.4244	24.1491	123387	11.7527	63.41	179227	117462	227495
S2D1	2390876	8.41713	23.767	149606	12.231	24.9957	146139	12.2556	57.9847	179159	116586	226449
S1A9	2416204	9.33227	26.2591	205695	11.4526	27.4599	155318	13.2552	67.5141	219517	141496	135853
S2F1	2425861	7.95942	22.5747	95450	12.8863	24.2524	120938	11.7643	58.5841	131371	85017	270821
S4D8	2438625	8.06105	22.8019	116908	10.806	24.1075	144872	11.3788	60.3131	158692	103088	212665
S2A6	2439693	8.16109	23.085	70205	20.4309	26.0394	142761	11.8538	55.2625	130139	82827	260411
S1D3	2449491	7.93991	22.2749	57054	12.0362	23.982	148816	12.124	64.9916	125017	80853	257709
S1G1	2450499	8.26238	23.3351	134912	12.1821	24.707	125762	12.7895	62.1287	157435	103239	201897
S1H1	2454504	8.20786	23.0582	120362	12.2067	24.361	133361	12.8855	61.5271	153366	100357	204843
S1C1	2463331	7.26754	20.6166	38359	18.2633	24.2891	92421	11.6912	59.1608	78949	51831	318959
S1D1	2477882	7.44633	21.155	35399	17.6088	25.1802	85990	12.4035	60.2268	73305	48084	313799
S1D5	2493145	8.38778	23.7045	115393	12.6723	25.2902	124196	12.6302	63.4958	145200	94389	180336
10190	2505347	8.3039	22.8697	115205	11.1789	24.307	82606	15.6627	69.5387	119952	77859	209912
S1G5	2545353	8.07215	22.873	74152	14.0733	25.2217	92241	12.863	61.9704	101105	65288	201324
S2C10	2572744	8.74513	24.7654	34493	21.3965	28.7172	130324	12.3753	54.239	100179	64638	175509

## Sheet: Supplementary file 1c
Table S3: Variance components analysis of 12 quantitative traits.
	Variance_DTB	Std.Dev_DTB	Variance_DTF	Std.Dev_DTF	Variance_DTBtoDTF	Std.Dev_DTBtoDTF	Variance_DTM	Std.Dev_DTM	Variance_PH	Std.Dev_PH	Variance_PL	Std.Dev_PL	Variance_NoB	Std.Dev_NoB	Variance_PD	Std.Dev_PD	Variance_yield	Std.Dev_yield	Varaence_Saponin	Std.Dev_saponin	Variance_Stl	Std.Dev_Stl	Varaence_TSW	Std.Dev_TKW
Accession	49.1037	7.0074	133.581	11.5577	60.162	7.75642	315.095	17.7509	1404.38	37.4751	220.79	14.859	5.62817	2.37238	1.24991	1.11799	59.2472	7.69722	15.1457	3.89175	0.18563	0.430848	0.270642	0.520233
Block	0.0465818	0.215828	0.823151	0.907276	0.367464	0.606188	0.128561	0.358554	6.43716	2.53716	1.99057	1.41088	0.331215	0.575513	0.0481879	0.219517	1.75996	1.32664	0.120745	0.347484	0.0784155	0.280028	6.44204e-06	0.00253812
Year	1.40694	1.18614	10.941	3.30771	4.20405	2.05038	0.119164	0.345202	0.384135	0.619786	15.2407	3.90394	0.471031	0.686317	0	0	0.385085	0.620552	4.1763	2.0436	0.188332	0.433972	0.00118072	0.0343616
Accession x Block	3.70971	1.92606	7.49049	2.73688	4.50548	2.12261	11.4618	3.38552	154.877	12.4449	49.4162	7.02967	5.28999	2.3	0.58461	0.764598	2.59e-06	0.00160868	0.665507	0.815786	0	0	0	0
Accession x Year	5.5889	2.36408	11.5431	3.39751	10.1785	3.19037	36.2856	6.02375	235.344	15.3409	87.4209	9.34992	6.75772	2.59956	0.593086	0.77012	9.52229	3.08582	6.70927	2.59023	0.0776153	0.278595	0.0142323	0.119299
Residual error	15.8015	3.97511	32.0407	5.66045	24.3815	4.93776	13.4791	3.67139	428.728	20.7057	156.921	12.5268	19.5491	4.42144	0.575382	0.75854	44.8537	6.69729	12.6779	3.56061	0.765696	0.875041	0.026815	0.163753
Broad sense heritability (h2)	0.880495	na	0.907544	na	0.849546	na	0.928648	na	0.853658	na	0.71889	na	0.401194	na	0.680326	na	0.828818	na	0.72693	na	0.527277	na	0.95895	na
pseudo-heritability (Variation explained by the kinship matrix)	0.539	na	0.606	na	0.76	na	0.34	na	0.408	na	0.32	na	0.63	na	0.593	na	0.137	na	0.869	na	0.543	na	0.535	na

## Sheet: Supplementary file 1d
Table S4: Summary of marker trait associations (MTA)
Trait	No of significant MTA 2018	No of significant MTA 2019	No of significant MTA BLUE	No. of consistant MTA
DTB	23	3	9	2
DTB to DTF	4	3	5	0
DTF	18	26	25	13
DTM	640	680	674	387
PH	43	23	54	11
PL	13	13	26	2
NoB	49	0	8	0
PD	91	11	46	2
TKW	316	496	508	168
Yield	7	49	19	0
Saponin	17	36	44	6
STL	13	1	4	0
FC	10	4	10	4
GT	1	27	14	0
SC	3	6	6	3
PSH	27	90	28	2
Mildew	NA	86	NA	NA
Total	1275	1554	1480	600

## Sheet: Supplementary file 1e
Table S5:Candidate genes linked to SNPs with significant trait associations
Trait	Chromosome	POS	concatenate	p-value	REF	ALT	SNP_location	effect in codon	effect on AA	Annotated gene
DTB	Cq8B	49897341	Cq8B_49897341	9.25e-08	A	T	intergenic_region	n.49897341A>T		T|intergenic_region|MODIFIER|CQ011659-CQ011660|CQ011659-CQ011660|intergenic_region|CQ011659-CQ011660|||n.49897341A>T||||||
DTB	Cq8B	50088679	Cq8B_50088679	3.73e-07	G	T	intergenic_region	n.50088679G>T		T|intergenic_region|MODIFIER|CQ011662-CQ011663|CQ011662-CQ011663|intergenic_region|CQ011662-CQ011663|||n.50088679G>T||||||
DTF	Cq2A	3840277	Cq2A_3840277	5.66e-07	G	A	5_prime_UTR_variant	c.-440C>T		A|5_prime_UTR_variant|MODIFIER|CQ053097|CQ053097|transcript|CQ053097-RA|protein_coding|1/2|c.-440C>T|||||440|
DTF	Cq2A	4242017	Cq2A_4242017	6.95e-08	C	T	synonymous_variant	c.1761G>A	p.Gln587Gln	T|synonymous_variant|LOW|CQ053133|CQ053133|transcript|CQ053133-RA|protein_coding|3/3|c.1761G>A|p.Gln587Gln|2790/3517|1761/1929|587/642||
DTF	Cq2A	4406829	Cq2A_4406829	4.85e-08	G	C	upstream_gene_variant,intergenic_region	c.-5099C>G,n.4406829G>C		C|upstream_gene_variant|MODIFIER|CQ053143|CQ053143|transcript|CQ053143-RA|protein_coding||c.-5099C>G|||||4703|,C|intergenic_region|MODIFIER|CQ053143-CQ053144|CQ053143-CQ053144|intergenic_region|CQ053143-CQ053144|||n.4406829G>C||||||
DTF	Cq2A	7738753	Cq2A_7738753	1.99e-07	T	A	3_prime_UTR_variant	c.*341T>A		A|3_prime_UTR_variant|MODIFIER|CQ053396|CQ053396|transcript|CQ053396-RA|protein_coding|4/4|c.*341T>A|||||341|
DTF	Cq2A	8093547	Cq2A_8093547	1.15e-08	C	G	intron_variant	c.170+530G>C		G|intron_variant|MODIFIER|CQ053414|CQ053414|transcript|CQ053414-RA|protein_coding|2/6|c.170+530G>C||||||
DTF	Cq2A	8102563	Cq2A_8102563	3.47e-07	C	T	intergenic_region	n.8102563C>T		T|intergenic_region|MODIFIER|CQ053414-CQ053415|CQ053414-CQ053415|intergenic_region|CQ053414-CQ053415|||n.8102563C>T||||||
DTF	Cq2A	8116642	Cq2A_8116642	7.81e-08	T	C	intergenic_region	n.8116642T>C		C|intergenic_region|MODIFIER|CQ053414-CQ053415|CQ053414-CQ053415|intergenic_region|CQ053414-CQ053415|||n.8116642T>C||||||
DTF	Cq8A	35159906	Cq8A_35159906	3.39e-07	T	C	intergenic_region	n.35159906T>C		C|intergenic_region|MODIFIER|CQ039432-CQ039433|CQ039432-CQ039433|intergenic_region|CQ039432-CQ039433|||n.35159906T>C||||||
DTF	Cq8A	35488532	Cq8A_35488532	8.52e-08	C	T	intergenic_region	n.35488532C>T		T|intergenic_region|MODIFIER|CQ039439-CQ039440|CQ039439-CQ039440|intergenic_region|CQ039439-CQ039440|||n.35488532C>T||||||
DTF	Cq8A	35710195	Cq8A_35710195	9.37e-07	C	T	upstream_gene_variant,downstream_gene_variant,downstream_gene_variant,downstream_gene_variant,intergenic_region	c.-355C>T,c.*1819C>T,c.*1219C>T,c.*724C>T,n.35710195C>T		T|upstream_gene_variant|MODIFIER|CQ039447|CQ039447|transcript|CQ039447-RA|protein_coding||c.-355C>T|||||355|,T|downstream_gene_variant|MODIFIER|CQ039444|CQ039444|transcript|CQ039444-RA|protein_coding||c.*1819C>T|||||1819|WARNING_TRANSCRIPT_NO_START_CODON,T|downstream_gene_variant|MODIFIER|CQ039445|CQ039445|transcript|CQ039445-RA|protein_coding||c.*1219C>T|||||1219|,T|downstream_gene_variant|MODIF…
DTF	Cq3B	974090	Cq3B_974090	4.53e-07	C	A	5_prime_UTR_variant,downstream_gene_variant,downstream_gene_variant,downstream_gene_variant,downstream_gene_variant	c.-256C>A,c.*4079C>A,c.*3629C>A,c.*1899C>A,c.*2052G>T		A|5_prime_UTR_variant|MODIFIER|CQ016549|CQ016549|transcript|CQ016549-RA|protein_coding|1/2|c.-256C>A|||||256|,A|downstream_gene_variant|MODIFIER|CQ016546|CQ016546|transcript|CQ016546-RA|protein_coding||c.*4079C>A|||||4079|,A|downstream_gene_variant|MODIFIER|CQ016547|CQ016547|transcript|CQ016547-RA|protein_coding||c.*3629C>A|||||3629|,A|downstream_gene_variant|MODIFIER|CQ016548|CQ016548|transcript…
DTF	Cq3B	1376257	Cq3B_1376257	4.4e-07	T	G	downstream_gene_variant,intron_variant	c.*2409T>G,c.1317+222A>C		G|downstream_gene_variant|MODIFIER|CQ016589|CQ016589|transcript|CQ016589-RA|protein_coding||c.*2409T>G|||||2240|,G|intron_variant|MODIFIER|CQ016590|CQ016590|transcript|CQ016590-RA|protein_coding|14/15|c.1317+222A>C||||||
DTF	Cq4B	3070104	Cq4B_3070104	5.39e-08	G	A	upstream_gene_variant,downstream_gene_variant,intergenic_region	c.-1398G>A,c.*2643C>T,n.3070104G>A		A|upstream_gene_variant|MODIFIER|CQ019941|CQ019941|transcript|CQ019941-RA|protein_coding||c.-1398G>A|||||1398|,A|downstream_gene_variant|MODIFIER|CQ019940|CQ019940|transcript|CQ019940-RA|protein_coding||c.*2643C>T|||||1242|,A|intergenic_region|MODIFIER|CQ019939-CQ019940|CQ019939-CQ019940|intergenic_region|CQ019939-CQ019940|||n.3070104G>A||||||
DTM	Cq1A	45324820	Cq1A_45324820	7.5e-08	C	T	upstream_gene_variant,intergenic_region	c.-4212C>T,n.45324820C>T		T|upstream_gene_variant|MODIFIER|CQ049278|CQ049278|transcript|CQ049278-RA|protein_coding||c.-4212C>T|||||3947|,T|intergenic_region|MODIFIER|CQ049277-CQ049278|CQ049277-CQ049278|intergenic_region|CQ049277-CQ049278|||n.45324820C>T||||||
DTM	Cq1A	46581556	Cq1A_46581556	2.34e-07	T	G	intergenic_region	n.46581556T>G		G|intergenic_region|MODIFIER|CQ049302-CQ049303|CQ049302-CQ049303|intergenic_region|CQ049302-CQ049303|||n.46581556T>G||||||
DTM	Cq2A	3840277	Cq2A_3840277	6.1e-07	G	A	5_prime_UTR_variant	c.-440C>T		A|5_prime_UTR_variant|MODIFIER|CQ053097|CQ053097|transcript|CQ053097-RA|protein_coding|1/2|c.-440C>T|||||440|
DTM	Cq2A	4242017	Cq2A_4242017	1.3e-08	C	T	synonymous_variant	c.1761G>A	p.Gln587Gln	T|synonymous_variant|LOW|CQ053133|CQ053133|transcript|CQ053133-RA|protein_coding|3/3|c.1761G>A|p.Gln587Gln|2790/3517|1761/1929|587/642||
DTM	Cq2A	4406829	Cq2A_4406829	7.63e-09	G	C	upstream_gene_variant,intergenic_region	c.-5099C>G,n.4406829G>C		C|upstream_gene_variant|MODIFIER|CQ053143|CQ053143|transcript|CQ053143-RA|protein_coding||c.-5099C>G|||||4703|,C|intergenic_region|MODIFIER|CQ053143-CQ053144|CQ053143-CQ053144|intergenic_region|CQ053143-CQ053144|||n.4406829G>C||||||
DTM	Cq2A	5426024	Cq2A_5426024	3.12e-07	G	A	intron_variant	c.1584+832G>A		A|intron_variant|MODIFIER|CQ053237|CQ053237|transcript|CQ053237-RA|protein_coding|6/7|c.1584+832G>A||||||
DTM	Cq2A	5651931	Cq2A_5651931	1.48e-09	T	C	intergenic_region	n.5651931T>C		C|intergenic_region|MODIFIER|CQ053254-CQ053256|CQ053254-CQ053256|intergenic_region|CQ053254-CQ053256|||n.5651931T>C||||||
DTM	Cq2A	5663039	Cq2A_5663039	4.34e-07	G	C	downstream_gene_variant,intron_variant	c.*2509C>G,c.420+475C>G		C|downstream_gene_variant|MODIFIER|CQ053257|CQ053257|transcript|CQ053257-RA|protein_coding||c.*2509C>G|||||2130|,C|intron_variant|MODIFIER|CQ053256|CQ053256|transcript|CQ053256-RA|protein_coding|2/9|c.420+475C>G||||||
DTM	Cq2A	6753998	Cq2A_6753998	6.13e-07	G	A	intergenic_region	n.6753998G>A		A|intergenic_region|MODIFIER|CQ053330-CQ053331|CQ053330-CQ053331|intergenic_region|CQ053330-CQ053331|||n.6753998G>A||||||
DTM	Cq2A	6785017	Cq2A_6785017	3.62e-07	G	A	downstream_gene_variant,downstream_gene_variant,intergenic_region	c.*8149G>A,c.*1066C>T,n.6785017G>A		A|downstream_gene_variant|MODIFIER|CQ053334|CQ053334|transcript|CQ053334-RA|protein_coding||c.*8149G>A|||||1374|,A|downstream_gene_variant|MODIFIER|CQ053336|CQ053336|transcript|CQ053336-RA|protein_coding||c.*1066C>T|||||460|,A|intergenic_region|MODIFIER|CQ053334-CQ053336|CQ053334-CQ053336|intergenic_region|CQ053334-CQ053336|||n.6785017G>A||||||
DTM	Cq2A	6793510	Cq2A_6793510	3.37e-07	G	A	upstream_gene_variant,downstream_gene_variant,intergenic_region	c.-2382C>T,c.*3135C>T,n.6793510G>A		A|upstream_gene_variant|MODIFIER|CQ053336|CQ053336|transcript|CQ053336-RA|protein_coding||c.-2382C>T|||||1700|,A|downstream_gene_variant|MODIFIER|CQ053337|CQ053337|transcript|CQ053337-RA|protein_coding||c.*3135C>T|||||2275|,A|intergenic_region|MODIFIER|CQ053336-CQ053337|CQ053336-CQ053337|intergenic_region|CQ053336-CQ053337|||n.6793510G>A||||||
DTM	Cq2A	6794034	Cq2A_6794034	2.46e-09	C	T	upstream_gene_variant,downstream_gene_variant,intergenic_region	c.-2906G>A,c.*2611G>A,n.6794034C>T		T|upstream_gene_variant|MODIFIER|CQ053336|CQ053336|transcript|CQ053336-RA|protein_coding||c.-2906G>A|||||2224|,T|downstream_gene_variant|MODIFIER|CQ053337|CQ053337|transcript|CQ053337-RA|protein_coding||c.*2611G>A|||||1751|,T|intergenic_region|MODIFIER|CQ053336-CQ053337|CQ053336-CQ053337|intergenic_region|CQ053336-CQ053337|||n.6794034C>T||||||
DTM	Cq2A	6804488	Cq2A_6804488	8.9e-07	T	C	upstream_gene_variant,intergenic_region	c.-2073A>G,n.6804488T>C		C|upstream_gene_variant|MODIFIER|CQ053337|CQ053337|transcript|CQ053337-RA|protein_coding||c.-2073A>G|||||2073|,C|intergenic_region|MODIFIER|CQ053337-CQ053338|CQ053337-CQ053338|intergenic_region|CQ053337-CQ053338|||n.6804488T>C||||||
DTM	Cq2A	6851439	Cq2A_6851439	1.31e-07	G	A	upstream_gene_variant,intergenic_region	c.-2989C>T,n.6851439G>A		A|upstream_gene_variant|MODIFIER|CQ053341|CQ053341|transcript|CQ053341-RA|protein_coding||c.-2989C>T|||||2989|WARNING_TRANSCRIPT_NO_STOP_CODON,A|intergenic_region|MODIFIER|CQ053341-CQ053342|CQ053341-CQ053342|intergenic_region|CQ053341-CQ053342|||n.6851439G>A||||||
DTM	Cq2A	6851440	Cq2A_6851440	1.31e-07	T	A	upstream_gene_variant,intergenic_region	c.-2990A>T,n.6851440T>A		A|upstream_gene_variant|MODIFIER|CQ053341|CQ053341|transcript|CQ053341-RA|protein_coding||c.-2990A>T|||||2990|WARNING_TRANSCRIPT_NO_STOP_CODON,A|intergenic_region|MODIFIER|CQ053341-CQ053342|CQ053341-CQ053342|intergenic_region|CQ053341-CQ053342|||n.6851440T>A||||||
DTM	Cq2A	6851616	Cq2A_6851616	5.36e-07	A	T	upstream_gene_variant,intergenic_region	c.-3166T>A,n.6851616A>T		T|upstream_gene_variant|MODIFIER|CQ053341|CQ053341|transcript|CQ053341-RA|protein_coding||c.-3166T>A|||||3166|WARNING_TRANSCRIPT_NO_STOP_CODON,T|intergenic_region|MODIFIER|CQ053341-CQ053342|CQ053341-CQ053342|intergenic_region|CQ053341-CQ053342|||n.6851616A>T||||||
DTM	Cq2A	6861480	Cq2A_6861480	6.33e-07	T	C	intergenic_region	n.6861480T>C		C|intergenic_region|MODIFIER|CQ053341-CQ053342|CQ053341-CQ053342|intergenic_region|CQ053341-CQ053342|||n.6861480T>C||||||
DTM	Cq2A	6862511	Cq2A_6862511	5.14e-08	A	T	intergenic_region	n.6862511A>T		T|intergenic_region|MODIFIER|CQ053341-CQ053342|CQ053341-CQ053342|intergenic_region|CQ053341-CQ053342|||n.6862511A>T||||||
DTM	Cq2A	6864907	Cq2A_6864907	3.38e-07	G	A	downstream_gene_variant,intergenic_region	c.*6809C>T,n.6864907G>A		A|downstream_gene_variant|MODIFIER|CQ053342|CQ053342|transcript|CQ053342-RA|protein_coding||c.*6809C>T|||||4408|WARNING_TRANSCRIPT_NO_START_CODON,A|intergenic_region|MODIFIER|CQ053341-CQ053342|CQ053341-CQ053342|intergenic_region|CQ053341-CQ053342|||n.6864907G>A||||||
DTM	Cq2A	6869821	Cq2A_6869821	1.48e-07	G	A	intron_variant	c.*102-232C>T		A|intron_variant|MODIFIER|CQ053342|CQ053342|transcript|CQ053342-RA|protein_coding|3/3|c.*102-232C>T||||||WARNING_TRANSCRIPT_NO_START_CODON
DTM	Cq2A	6872335	Cq2A_6872335	6.37e-09	A	T	intron_variant	c.189+446T>A		T|intron_variant|MODIFIER|CQ053342|CQ053342|transcript|CQ053342-RA|protein_coding|2/3|c.189+446T>A||||||WARNING_TRANSCRIPT_NO_START_CODON
DTM	Cq2A	6878191	Cq2A_6878191	2.86e-07	A	C	intergenic_region	n.6878191A>C		C|intergenic_region|MODIFIER|CQ053342-CQ053343|CQ053342-CQ053343|intergenic_region|CQ053342-CQ053343|||n.6878191A>C||||||
DTM	Cq2A	6879078	Cq2A_6879078	6.32e-07	A	G	intergenic_region	n.6879078A>G		G|intergenic_region|MODIFIER|CQ053342-CQ053343|CQ053342-CQ053343|intergenic_region|CQ053342-CQ053343|||n.6879078A>G||||||
DTM	Cq2A	6886645	Cq2A_6886645	5.93e-07	C	A	intergenic_region	n.6886645C>A		A|intergenic_region|MODIFIER|CQ053342-CQ053343|CQ053342-CQ053343|intergenic_region|CQ053342-CQ053343|||n.6886645C>A||||||
DTM	Cq2A	6941626	Cq2A_6941626	4.72e-07	C	T	upstream_gene_variant,intergenic_region	c.-3818C>T,n.6941626C>T		T|upstream_gene_variant|MODIFIER|CQ053343|CQ053343|transcript|CQ053343-RA|protein_coding||c.-3818C>T|||||3568|,T|intergenic_region|MODIFIER|CQ053342-CQ053343|CQ053342-CQ053343|intergenic_region|CQ053342-CQ053343|||n.6941626C>T||||||
DTM	Cq2A	6961685	Cq2A_6961685	4.96e-07	C	T	intergenic_region	n.6961685C>T		T|intergenic_region|MODIFIER|CQ053344-CQ053345|CQ053344-CQ053345|intergenic_region|CQ053344-CQ053345|||n.6961685C>T||||||
DTM	Cq2A	6962129	Cq2A_6962129	1.83e-07	C	T	intergenic_region	n.6962129C>T		T|intergenic_region|MODIFIER|CQ053344-CQ053345|CQ053344-CQ053345|intergenic_region|CQ053344-CQ053345|||n.6962129C>T||||||
DTM	Cq2A	6974314	Cq2A_6974314	2.06e-07	G	A	upstream_gene_variant,intergenic_region	c.-499G>A,n.6974314G>A		A|upstream_gene_variant|MODIFIER|CQ053345|CQ053345|transcript|CQ053345-RA|protein_coding||c.-499G>A|||||499|,A|intergenic_region|MODIFIER|CQ053344-CQ053345|CQ053344-CQ053345|intergenic_region|CQ053344-CQ053345|||n.6974314G>A||||||
DTM	Cq2A	6975708	Cq2A_6975708	4.92e-07	G	A	downstream_gene_variant,intergenic_region	c.*274G>A,n.6975708G>A		A|downstream_gene_variant|MODIFIER|CQ053345|CQ053345|transcript|CQ053345-RA|protein_coding||c.*274G>A|||||274|,A|intergenic_region|MODIFIER|CQ053345-CQ053346|CQ053345-CQ053346|intergenic_region|CQ053345-CQ053346|||n.6975708G>A||||||
DTM	Cq2A	6988555	Cq2A_6988555	2.67e-08	G	T	downstream_gene_variant,intergenic_region	c.*2060C>A,n.6988555G>T		T|downstream_gene_variant|MODIFIER|CQ053346|CQ053346|transcript|CQ053346-RA|protein_coding||c.*2060C>A|||||1750|,T|intergenic_region|MODIFIER|CQ053345-CQ053346|CQ053345-CQ053346|intergenic_region|CQ053345-CQ053346|||n.6988555G>T||||||
DTM	Cq2A	6992663	Cq2A_6992663	2.05e-07	T	C	5_prime_UTR_premature_start_codon_gain_variant,5_prime_UTR_variant	c.-33A>G,c.-33A>G		C|5_prime_UTR_premature_start_codon_gain_variant|LOW|CQ053346|CQ053346|transcript|CQ053346-RA|protein_coding|1/3|c.-33A>G||||||,C|5_prime_UTR_variant|MODIFIER|CQ053346|CQ053346|transcript|CQ053346-RA|protein_coding|1/3|c.-33A>G|||||33|
DTM	Cq2A	7005292	Cq2A_7005292	6.77e-07	C	T	intergenic_region	n.7005292C>T		T|intergenic_region|MODIFIER|CQ053346-CQ053347|CQ053346-CQ053347|intergenic_region|CQ053346-CQ053347|||n.7005292C>T||||||
DTM	Cq2A	7007135	Cq2A_7007135	6.62e-07	T	G	intergenic_region	n.7007135T>G		G|intergenic_region|MODIFIER|CQ053346-CQ053347|CQ053346-CQ053347|intergenic_region|CQ053346-CQ053347|||n.7007135T>G||||||
DTM	Cq2A	7010882	Cq2A_7010882	1.31e-07	A	T	intergenic_region	n.7010882A>T		T|intergenic_region|MODIFIER|CQ053346-CQ053347|CQ053346-CQ053347|intergenic_region|CQ053346-CQ053347|||n.7010882A>T||||||
DTM	Cq2A	7013897	Cq2A_7013897	3.27e-08	C	G	intergenic_region	n.7013897C>G		G|intergenic_region|MODIFIER|CQ053346-CQ053347|CQ053346-CQ053347|intergenic_region|CQ053346-CQ053347|||n.7013897C>G||||||
DTM	Cq2A	7013936	Cq2A_7013936	7.38e-08	G	T	intergenic_region	n.7013936G>T		T|intergenic_region|MODIFIER|CQ053346-CQ053347|CQ053346-CQ053347|intergenic_region|CQ053346-CQ053347|||n.7013936G>T||||||
DTM	Cq2A	7016172	Cq2A_7016172	1.85e-07	G	T	intergenic_region	n.7016172G>T		T|intergenic_region|MODIFIER|CQ053346-CQ053347|CQ053346-CQ053347|intergenic_region|CQ053346-CQ053347|||n.7016172G>T||||||
DTM	Cq2A	7016184	Cq2A_7016184	1.63e-07	G	A	intergenic_region	n.7016184G>A		A|intergenic_region|MODIFIER|CQ053346-CQ053347|CQ053346-CQ053347|intergenic_region|CQ053346-CQ053347|||n.7016184G>A||||||
DTM	Cq2A	7030321	Cq2A_7030321	1.09e-07	C	A	intergenic_region	n.7030321C>A		A|intergenic_region|MODIFIER|CQ053346-CQ053347|CQ053346-CQ053347|intergenic_region|CQ053346-CQ053347|||n.7030321C>A||||||
DTM	Cq2A	7030354	Cq2A_7030354	3.98e-07	C	T	intergenic_region	n.7030354C>T		T|intergenic_region|MODIFIER|CQ053346-CQ053347|CQ053346-CQ053347|intergenic_region|CQ053346-CQ053347|||n.7030354C>T||||||
DTM	Cq2A	7032236	Cq2A_7032236	5.89e-07	T	A	intergenic_region	n.7032236T>A		A|intergenic_region|MODIFIER|CQ053346-CQ053347|CQ053346-CQ053347|intergenic_region|CQ053346-CQ053347|||n.7032236T>A||||||
DTM	Cq2A	7040638	Cq2A_7040638	3.25e-08	A	G	intergenic_region	n.7040638A>G		G|intergenic_region|MODIFIER|CQ053346-CQ053347|CQ053346-CQ053347|intergenic_region|CQ053346-CQ053347|||n.7040638A>G||||||
DTM	Cq2A	7051698	Cq2A_7051698	7.29e-07	A	G	downstream_gene_variant,intergenic_region	c.*3822A>G,n.7051698A>G		G|downstream_gene_variant|MODIFIER|CQ053347|CQ053347|transcript|CQ053347-RA|protein_coding||c.*3822A>G|||||3822|,G|intergenic_region|MODIFIER|CQ053347-CQ053348|CQ053347-CQ053348|intergenic_region|CQ053347-CQ053348|||n.7051698A>G||||||
DTM	Cq2A	7057892	Cq2A_7057892	5.18e-07	G	A	upstream_gene_variant,intergenic_region	c.-2492G>A,n.7057892G>A		A|upstream_gene_variant|MODIFIER|CQ053348|CQ053348|transcript|CQ053348-RA|protein_coding||c.-2492G>A|||||2492|,A|intergenic_region|MODIFIER|CQ053347-CQ053348|CQ053347-CQ053348|intergenic_region|CQ053347-CQ053348|||n.7057892G>A||||||
DTM	Cq2A	7060168	Cq2A_7060168	7.56e-07	G	A	upstream_gene_variant,intergenic_region	c.-216G>A,n.7060168G>A		A|upstream_gene_variant|MODIFIER|CQ053348|CQ053348|transcript|CQ053348-RA|protein_coding||c.-216G>A|||||216|,A|intergenic_region|MODIFIER|CQ053347-CQ053348|CQ053347-CQ053348|intergenic_region|CQ053347-CQ053348|||n.7060168G>A||||||
DTM	Cq2A	7060403	Cq2A_7060403	2.54e-08	T	C	missense_variant	c.20T>C	p.Val7Ala	C|missense_variant|MODERATE|CQ053348|CQ053348|transcript|CQ053348-RA|protein_coding|1/2|c.20T>C|p.Val7Ala|20/357|20/357|7/118||
DTM	Cq2A	7093949	Cq2A_7093949	7.62e-07	G	A	upstream_gene_variant,downstream_gene_variant,downstream_gene_variant,downstream_gene_variant,intergenic_region	c.-939C>T,c.*4799G>A,c.*316C>T,c.*433C>T,n.7093949G>A		A|upstream_gene_variant|MODIFIER|CQ053350|CQ053350|transcript|CQ053350-RA|protein_coding||c.-939C>T|||||939|,A|downstream_gene_variant|MODIFIER|CQ053349|CQ053349|transcript|CQ053349-RA|protein_coding||c.*4799G>A|||||4799|,A|downstream_gene_variant|MODIFIER|CQ053351|CQ053351|transcript|CQ053351-RA|protein_coding||c.*316C>T|||||316|,A|downstream_gene_variant|MODIFIER|CQ053352|CQ053352|transcript|CQ…
DTM	Cq2A	7099741	Cq2A_7099741	4.54e-07	C	G	upstream_gene_variant,downstream_gene_variant,intergenic_region	c.-184G>C,c.*2189G>C,n.7099741C>G		G|upstream_gene_variant|MODIFIER|CQ053352|CQ053352|transcript|CQ053352-RA|protein_coding||c.-184G>C|||||184|,G|downstream_gene_variant|MODIFIER|CQ053353|CQ053353|transcript|CQ053353-RA|protein_coding||c.*2189G>C|||||1969|,G|intergenic_region|MODIFIER|CQ053352-CQ053353|CQ053352-CQ053353|intergenic_region|CQ053352-CQ053353|||n.7099741C>G||||||
DTM	Cq2A	7105111	Cq2A_7105111	4.62e-08	A	T	upstream_gene_variant,intergenic_region	c.-1484T>A,n.7105111A>T		T|upstream_gene_variant|MODIFIER|CQ053353|CQ053353|transcript|CQ053353-RA|protein_coding||c.-1484T>A|||||1213|,T|intergenic_region|MODIFIER|CQ053353-CQ053354|CQ053353-CQ053354|intergenic_region|CQ053353-CQ053354|||n.7105111A>T||||||
DTM	Cq2A	7117747	Cq2A_7117747	1.09e-07	G	T	intergenic_region	n.7117747G>T		T|intergenic_region|MODIFIER|CQ053353-CQ053354|CQ053353-CQ053354|intergenic_region|CQ053353-CQ053354|||n.7117747G>T||||||
DTM	Cq2A	7122834	Cq2A_7122834	6.01e-07	G	T	intergenic_region	n.7122834G>T		T|intergenic_region|MODIFIER|CQ053353-CQ053354|CQ053353-CQ053354|intergenic_region|CQ053353-CQ053354|||n.7122834G>T||||||
DTM	Cq2A	7125446	Cq2A_7125446	5.13e-07	C	T	intergenic_region	n.7125446C>T		T|intergenic_region|MODIFIER|CQ053353-CQ053354|CQ053353-CQ053354|intergenic_region|CQ053353-CQ053354|||n.7125446C>T||||||
DTM	Cq2A	7143140	Cq2A_7143140	2.83e-07	C	A	downstream_gene_variant,intergenic_region	c.*4467C>A,n.7143140C>A		A|downstream_gene_variant|MODIFIER|CQ053354|CQ053354|transcript|CQ053354-RA|protein_coding||c.*4467C>A|||||4233|,A|intergenic_region|MODIFIER|CQ053354-CQ053355|CQ053354-CQ053355|intergenic_region|CQ053354-CQ053355|||n.7143140C>A||||||
DTM	Cq2A	7163401	Cq2A_7163401	4.76e-07	C	T	intergenic_region	n.7163401C>T		T|intergenic_region|MODIFIER|CQ053354-CQ053355|CQ053354-CQ053355|intergenic_region|CQ053354-CQ053355|||n.7163401C>T||||||
DTM	Cq2A	7164181	Cq2A_7164181	5.58e-09	T	C	intergenic_region	n.7164181T>C		C|intergenic_region|MODIFIER|CQ053354-CQ053355|CQ053354-CQ053355|intergenic_region|CQ053354-CQ053355|||n.7164181T>C||||||
DTM	Cq2A	7167115	Cq2A_7167115	5.35e-08	C	T	intergenic_region	n.7167115C>T		T|intergenic_region|MODIFIER|CQ053354-CQ053355|CQ053354-CQ053355|intergenic_region|CQ053354-CQ053355|||n.7167115C>T||||||
DTM	Cq2A	7173793	Cq2A_7173793	1.98e-07	C	T	upstream_gene_variant,downstream_gene_variant,intron_variant	c.-1353G>A,c.*1579C>T,c.201+118G>A		T|upstream_gene_variant|MODIFIER|CQ053356|CQ053356|transcript|CQ053356-RA|protein_coding||c.-1353G>A|||||1353|WARNING_TRANSCRIPT_MULTIPLE_STOP_CODONS,T|downstream_gene_variant|MODIFIER|CQ053355|CQ053355|transcript|CQ053355-RA|protein_coding||c.*1579C>T|||||1579|WARNING_TRANSCRIPT_MULTIPLE_STOP_CODONS,T|intron_variant|MODIFIER|CQ053357|CQ053357|transcript|CQ053357-RA|protein_coding|2/3|c.201+118G>…
DTM	Cq2A	7177862	Cq2A_7177862	5.45e-07	G	A	upstream_gene_variant,downstream_gene_variant,intergenic_region	c.-3646C>T,c.*1380C>T,n.7177862G>A		A|upstream_gene_variant|MODIFIER|CQ053357|CQ053357|transcript|CQ053357-RA|protein_coding||c.-3646C>T|||||3646|WARNING_TRANSCRIPT_NO_START_CODON,A|downstream_gene_variant|MODIFIER|CQ053358|CQ053358|transcript|CQ053358-RA|protein_coding||c.*1380C>T|||||1380|,A|intergenic_region|MODIFIER|CQ053357-CQ053358|CQ053357-CQ053358|intergenic_region|CQ053357-CQ053358|||n.7177862G>A||||||
DTM	Cq2A	7192244	Cq2A_7192244	1.33e-08	T	C	upstream_gene_variant,downstream_gene_variant,intergenic_region	c.-1099T>C,c.*3471A>G,n.7192244T>C		C|upstream_gene_variant|MODIFIER|CQ053359|CQ053359|transcript|CQ053359-RA|protein_coding||c.-1099T>C|||||697|,C|downstream_gene_variant|MODIFIER|CQ053360|CQ053360|transcript|CQ053360-RA|protein_coding||c.*3471A>G|||||2965|,C|intergenic_region|MODIFIER|CQ053358-CQ053359|CQ053358-CQ053359|intergenic_region|CQ053358-CQ053359|||n.7192244T>C||||||
DTM	Cq2A	7198898	Cq2A_7198898	5.43e-09	C	A	upstream_gene_variant,downstream_gene_variant,intron_variant	c.-1970G>T,c.*2240G>T,c.466-277C>A		A|upstream_gene_variant|MODIFIER|CQ053360|CQ053360|transcript|CQ053360-RA|protein_coding||c.-1970G>T|||||1970|,A|downstream_gene_variant|MODIFIER|CQ053361|CQ053361|transcript|CQ053361-RA|protein_coding||c.*2240G>T|||||2240|,A|intron_variant|MODIFIER|CQ053359|CQ053359|transcript|CQ053359-RA|protein_coding|1/1|c.466-277C>A||||||
DTM	Cq2A	7198999	Cq2A_7198999	3.33e-07	G	A	upstream_gene_variant,downstream_gene_variant,intron_variant	c.-2071C>T,c.*2139C>T,c.466-176G>A		A|upstream_gene_variant|MODIFIER|CQ053360|CQ053360|transcript|CQ053360-RA|protein_coding||c.-2071C>T|||||2071|,A|downstream_gene_variant|MODIFIER|CQ053361|CQ053361|transcript|CQ053361-RA|protein_coding||c.*2139C>T|||||2139|,A|intron_variant|MODIFIER|CQ053359|CQ053359|transcript|CQ053359-RA|protein_coding|1/1|c.466-176G>A||||||
DTM	Cq2A	7228279	Cq2A_7228279	1.99e-07	A	G	upstream_gene_variant,upstream_gene_variant,upstream_gene_variant,downstream_gene_variant,intergenic_region	c.-1143A>G,c.-1596A>G,c.-1751A>G,c.*2250T>C,n.7228279A>G		G|upstream_gene_variant|MODIFIER|CQ053364|CQ053364|transcript|CQ053364-RA|protein_coding||c.-1143A>G|||||1143|WARNING_TRANSCRIPT_INCOMPLETE,G|upstream_gene_variant|MODIFIER|CQ053365|CQ053365|transcript|CQ053365-RA|protein_coding||c.-1596A>G|||||1596|WARNING_TRANSCRIPT_MULTIPLE_STOP_CODONS,G|upstream_gene_variant|MODIFIER|CQ053366|CQ053366|transcript|CQ053366-RA|protein_coding||c.-1751A>G|||||1751…
DTM	Cq2A	7286123	Cq2A_7286123	5.46e-08	C	A	downstream_gene_variant,downstream_gene_variant,intergenic_region	c.*2637G>T,c.*3336G>T,n.7286123C>A		A|downstream_gene_variant|MODIFIER|CQ053371|CQ053371|transcript|CQ053371-RA|protein_coding||c.*2637G>T|||||2637|,A|downstream_gene_variant|MODIFIER|CQ053372|CQ053372|transcript|CQ053372-RA|protein_coding||c.*3336G>T|||||3336|,A|intergenic_region|MODIFIER|CQ053370-CQ053371|CQ053370-CQ053371|intergenic_region|CQ053370-CQ053371|||n.7286123C>A||||||
DTM	Cq2A	7286176	Cq2A_7286176	6.06e-08	T	A	downstream_gene_variant,downstream_gene_variant,intergenic_region	c.*2584A>T,c.*3283A>T,n.7286176T>A		A|downstream_gene_variant|MODIFIER|CQ053371|CQ053371|transcript|CQ053371-RA|protein_coding||c.*2584A>T|||||2584|,A|downstream_gene_variant|MODIFIER|CQ053372|CQ053372|transcript|CQ053372-RA|protein_coding||c.*3283A>T|||||3283|,A|intergenic_region|MODIFIER|CQ053370-CQ053371|CQ053370-CQ053371|intergenic_region|CQ053370-CQ053371|||n.7286176T>A||||||
DTM	Cq2A	7323600	Cq2A_7323600	1.63e-07	A	G	downstream_gene_variant,downstream_gene_variant,intergenic_region	c.*801T>C,c.*1645T>C,n.7323600A>G		G|downstream_gene_variant|MODIFIER|CQ053374|CQ053374|transcript|CQ053374-RA|protein_coding||c.*801T>C|||||801|,G|downstream_gene_variant|MODIFIER|CQ053375|CQ053375|transcript|CQ053375-RA|protein_coding||c.*1645T>C|||||1645|,G|intergenic_region|MODIFIER|CQ053373-CQ053374|CQ053373-CQ053374|intergenic_region|CQ053373-CQ053374|||n.7323600A>G||||||
DTM	Cq2A	7362204	Cq2A_7362204	2.27e-07	T	C	upstream_gene_variant,intergenic_region	c.-1969A>G,n.7362204T>C		C|upstream_gene_variant|MODIFIER|CQ053378|CQ053378|transcript|CQ053378-RA|protein_coding||c.-1969A>G|||||1969|,C|intergenic_region|MODIFIER|CQ053378-CQ053379|CQ053378-CQ053379|intergenic_region|CQ053378-CQ053379|||n.7362204T>C||||||
DTM	Cq2A	7380626	Cq2A_7380626	4.03e-08	G	A	intergenic_region	n.7380626G>A		A|intergenic_region|MODIFIER|CQ053378-CQ053379|CQ053378-CQ053379|intergenic_region|CQ053378-CQ053379|||n.7380626G>A||||||
DTM	Cq2A	7383072	Cq2A_7383072	7.14e-11	T	C	intergenic_region	n.7383072T>C		C|intergenic_region|MODIFIER|CQ053378-CQ053379|CQ053378-CQ053379|intergenic_region|CQ053378-CQ053379|||n.7383072T>C||||||
DTM	Cq2A	7384707	Cq2A_7384707	5.28e-08	A	G	intergenic_region	n.7384707A>G		G|intergenic_region|MODIFIER|CQ053378-CQ053379|CQ053378-CQ053379|intergenic_region|CQ053378-CQ053379|||n.7384707A>G||||||
DTM	Cq2A	7396046	Cq2A_7396046	1.36e-09	T	G	downstream_gene_variant,intergenic_region	c.*2503A>C,n.7396046T>G		G|downstream_gene_variant|MODIFIER|CQ053379|CQ053379|transcript|CQ053379-RA|protein_coding||c.*2503A>C|||||2503|,G|intergenic_region|MODIFIER|CQ053378-CQ053379|CQ053378-CQ053379|intergenic_region|CQ053378-CQ053379|||n.7396046T>G||||||
DTM	Cq2A	7422950	Cq2A_7422950	5.15e-08	G	C	downstream_gene_variant,intergenic_region	c.*2268C>G,n.7422950G>C		C|downstream_gene_variant|MODIFIER|CQ053382|CQ053382|transcript|CQ053382-RA|protein_coding||c.*2268C>G|||||1697|,C|intergenic_region|MODIFIER|CQ053381-CQ053382|CQ053381-CQ053382|intergenic_region|CQ053381-CQ053382|||n.7422950G>C||||||
DTM	Cq2A	7449964	Cq2A_7449964	2e-09	A	G	upstream_gene_variant,intergenic_region	c.-2540A>G,n.7449964A>G		G|upstream_gene_variant|MODIFIER|CQ053384|CQ053384|transcript|CQ053384-RA|protein_coding||c.-2540A>G|||||1979|,G|intergenic_region|MODIFIER|CQ053383-CQ053384|CQ053383-CQ053384|intergenic_region|CQ053383-CQ053384|||n.7449964A>G||||||
DTM	Cq2A	7450469	Cq2A_7450469	6.26e-08	A	G	upstream_gene_variant,intergenic_region	c.-2035A>G,n.7450469A>G		G|upstream_gene_variant|MODIFIER|CQ053384|CQ053384|transcript|CQ053384-RA|protein_coding||c.-2035A>G|||||1474|,G|intergenic_region|MODIFIER|CQ053383-CQ053384|CQ053383-CQ053384|intergenic_region|CQ053383-CQ053384|||n.7450469A>G||||||
DTM	Cq2A	7468564	Cq2A_7468564	3.89e-09	C	A	downstream_gene_variant,downstream_gene_variant,intergenic_region	c.*5623C>A,c.*418C>A,n.7468564C>A		A|downstream_gene_variant|MODIFIER|CQ053384|CQ053384|transcript|CQ053384-RA|protein_coding||c.*5623C>A|||||4986|,A|downstream_gene_variant|MODIFIER|CQ053385|CQ053385|transcript|CQ053385-RA|protein_coding||c.*418C>A|||||259|,A|intergenic_region|MODIFIER|CQ053385-CQ053386|CQ053385-CQ053386|intergenic_region|CQ053385-CQ053386|||n.7468564C>A||||||
DTM	Cq2A	7487788	Cq2A_7487788	5.43e-08	A	T	downstream_gene_variant,intergenic_region	c.*1691A>T,n.7487788A>T		T|downstream_gene_variant|MODIFIER|CQ053386|CQ053386|transcript|CQ053386-RA|protein_coding||c.*1691A>T|||||1495|,T|intergenic_region|MODIFIER|CQ053386-CQ053387|CQ053386-CQ053387|intergenic_region|CQ053386-CQ053387|||n.7487788A>T||||||
DTM	Cq2A	7510015	Cq2A_7510015	6.1e-10	G	A	upstream_gene_variant,downstream_gene_variant,intron_variant	c.-5049C>T,c.*2976C>T,c.455-613G>A		A|upstream_gene_variant|MODIFIER|CQ053388|CQ053388|transcript|CQ053388-RA|protein_coding||c.-5049C>T|||||4844|,A|downstream_gene_variant|MODIFIER|CQ053390|CQ053390|transcript|CQ053390-RA|protein_coding||c.*2976C>T|||||2285|,A|intron_variant|MODIFIER|CQ053389|CQ053389|transcript|CQ053389-RA|protein_coding|2/4|c.455-613G>A||||||
DTM	Cq2A	7510216	Cq2A_7510216	1.39e-08	A	G	downstream_gene_variant,intron_variant	c.*2775T>C,c.455-412A>G		G|downstream_gene_variant|MODIFIER|CQ053390|CQ053390|transcript|CQ053390-RA|protein_coding||c.*2775T>C|||||2084|,G|intron_variant|MODIFIER|CQ053389|CQ053389|transcript|CQ053389-RA|protein_coding|2/4|c.455-412A>G||||||
DTM	Cq2A	7510350	Cq2A_7510350	8.48e-07	G	T	downstream_gene_variant,intron_variant	c.*2641C>A,c.455-278G>T		T|downstream_gene_variant|MODIFIER|CQ053390|CQ053390|transcript|CQ053390-RA|protein_coding||c.*2641C>A|||||1950|,T|intron_variant|MODIFIER|CQ053389|CQ053389|transcript|CQ053389-RA|protein_coding|2/4|c.455-278G>T||||||
DTM	Cq2A	7514348	Cq2A_7514348	2.96e-08	T	C	synonymous_variant,downstream_gene_variant	c.468A>G,c.*2989T>C	p.Glu156Glu,.	C|synonymous_variant|LOW|CQ053390|CQ053390|transcript|CQ053390-RA|protein_coding|7/8|c.468A>G|p.Glu156Glu|868/2045|468/954|156/317||,C|downstream_gene_variant|MODIFIER|CQ053389|CQ053389|transcript|CQ053389-RA|protein_coding||c.*2989T>C|||||2517|
DTM	Cq2A	7522965	Cq2A_7522965	9.85e-08	C	G	upstream_gene_variant,intergenic_region	c.-3624G>C,n.7522965C>G		G|upstream_gene_variant|MODIFIER|CQ053390|CQ053390|transcript|CQ053390-RA|protein_coding||c.-3624G>C|||||3224|,G|intergenic_region|MODIFIER|CQ053390-CQ053391|CQ053390-CQ053391|intergenic_region|CQ053390-CQ053391|||n.7522965C>G||||||
DTM	Cq2A	7523047	Cq2A_7523047	2.69e-09	G	A	upstream_gene_variant,intergenic_region	c.-3706C>T,n.7523047G>A		A|upstream_gene_variant|MODIFIER|CQ053390|CQ053390|transcript|CQ053390-RA|protein_coding||c.-3706C>T|||||3306|,A|intergenic_region|MODIFIER|CQ053390-CQ053391|CQ053390-CQ053391|intergenic_region|CQ053390-CQ053391|||n.7523047G>A||||||
DTM	Cq2A	7523251	Cq2A_7523251	2.12e-08	A	G	upstream_gene_variant,intergenic_region	c.-3910T>C,n.7523251A>G		G|upstream_gene_variant|MODIFIER|CQ053390|CQ053390|transcript|CQ053390-RA|protein_coding||c.-3910T>C|||||3510|,G|intergenic_region|MODIFIER|CQ053390-CQ053391|CQ053390-CQ053391|intergenic_region|CQ053390-CQ053391|||n.7523251A>G||||||
DTM	Cq2A	7523281	Cq2A_7523281	2.37e-11	T	C	upstream_gene_variant,intergenic_region	c.-3940A>G,n.7523281T>C		C|upstream_gene_variant|MODIFIER|CQ053390|CQ053390|transcript|CQ053390-RA|protein_coding||c.-3940A>G|||||3540|,C|intergenic_region|MODIFIER|CQ053390-CQ053391|CQ053390-CQ053391|intergenic_region|CQ053390-CQ053391|||n.7523281T>C||||||
DTM	Cq2A	7523592	Cq2A_7523592	1.57e-08	G	T	upstream_gene_variant,intergenic_region	c.-4251C>A,n.7523592G>T		T|upstream_gene_variant|MODIFIER|CQ053390|CQ053390|transcript|CQ053390-RA|protein_coding||c.-4251C>A|||||3851|,T|intergenic_region|MODIFIER|CQ053390-CQ053391|CQ053390-CQ053391|intergenic_region|CQ053390-CQ053391|||n.7523592G>T||||||
DTM	Cq2A	7524409	Cq2A_7524409	1.79e-09	G	C	upstream_gene_variant,intergenic_region	c.-5068C>G,n.7524409G>C		C|upstream_gene_variant|MODIFIER|CQ053390|CQ053390|transcript|CQ053390-RA|protein_coding||c.-5068C>G|||||4668|,C|intergenic_region|MODIFIER|CQ053390-CQ053391|CQ053390-CQ053391|intergenic_region|CQ053390-CQ053391|||n.7524409G>C||||||
DTM	Cq2A	7525598	Cq2A_7525598	2.29e-09	G	A	intergenic_region	n.7525598G>A		A|intergenic_region|MODIFIER|CQ053390-CQ053391|CQ053390-CQ053391|intergenic_region|CQ053390-CQ053391|||n.7525598G>A||||||
DTM	Cq2A	7530144	Cq2A_7530144	1.04e-08	C	A	intergenic_region	n.7530144C>A		A|intergenic_region|MODIFIER|CQ053390-CQ053391|CQ053390-CQ053391|intergenic_region|CQ053390-CQ053391|||n.7530144C>A||||||
DTM	Cq2A	7530281	Cq2A_7530281	1.15e-08	T	C	intergenic_region	n.7530281T>C		C|intergenic_region|MODIFIER|CQ053390-CQ053391|CQ053390-CQ053391|intergenic_region|CQ053390-CQ053391|||n.7530281T>C||||||
DTM	Cq2A	7536436	Cq2A_7536436	1.85e-07	C	T	missense_variant	c.107C>T	p.Ser36Phe	T|missense_variant|MODERATE|CQ053391|CQ053391|transcript|CQ053391-RA|protein_coding|1/1|c.107C>T|p.Ser36Phe|107/411|107/411|36/136||
DTM	Cq2A	7537774	Cq2A_7537774	1.95e-09	A	C	downstream_gene_variant,intergenic_region	c.*1034A>C,n.7537774A>C		C|downstream_gene_variant|MODIFIER|CQ053391|CQ053391|transcript|CQ053391-RA|protein_coding||c.*1034A>C|||||1034|,C|intergenic_region|MODIFIER|CQ053391-CQ053392|CQ053391-CQ053392|intergenic_region|CQ053391-CQ053392|||n.7537774A>C||||||
DTM	Cq2A	7558196	Cq2A_7558196	1.27e-07	T	C	intergenic_region	n.7558196T>C		C|intergenic_region|MODIFIER|CQ053391-CQ053392|CQ053391-CQ053392|intergenic_region|CQ053391-CQ053392|||n.7558196T>C||||||
DTM	Cq2A	7572066	Cq2A_7572066	1.99e-07	A	T	downstream_gene_variant,intergenic_region	c.*2091T>A,n.7572066A>T		T|downstream_gene_variant|MODIFIER|CQ053392|CQ053392|transcript|CQ053392-RA|protein_coding||c.*2091T>A|||||1466|,T|intergenic_region|MODIFIER|CQ053391-CQ053392|CQ053391-CQ053392|intergenic_region|CQ053391-CQ053392|||n.7572066A>T||||||
DTM	Cq2A	7584887	Cq2A_7584887	3.57e-07	C	T	intron_variant	c.881-808G>A		T|intron_variant|MODIFIER|CQ053392|CQ053392|transcript|CQ053392-RA|protein_coding|8/24|c.881-808G>A||||||
DTM	Cq2A	7593860	Cq2A_7593860	2.05e-07	C	T	upstream_gene_variant,intergenic_region	c.-2736G>A,n.7593860C>T		T|upstream_gene_variant|MODIFIER|CQ053392|CQ053392|transcript|CQ053392-RA|protein_coding||c.-2736G>A|||||2293|,T|intergenic_region|MODIFIER|CQ053392-CQ053393|CQ053392-CQ053393|intergenic_region|CQ053392-CQ053393|||n.7593860C>T||||||
DTM	Cq2A	7594264	Cq2A_7594264	1.59e-08	A	G	upstream_gene_variant,intergenic_region	c.-3140T>C,n.7594264A>G		G|upstream_gene_variant|MODIFIER|CQ053392|CQ053392|transcript|CQ053392-RA|protein_coding||c.-3140T>C|||||2697|,G|intergenic_region|MODIFIER|CQ053392-CQ053393|CQ053392-CQ053393|intergenic_region|CQ053392-CQ053393|||n.7594264A>G||||||
DTM	Cq2A	7598750	Cq2A_7598750	2.73e-08	G	A	upstream_gene_variant,intergenic_region	c.-5227G>A,n.7598750G>A		A|upstream_gene_variant|MODIFIER|CQ053393|CQ053393|transcript|CQ053393-RA|protein_coding||c.-5227G>A|||||3967|,A|intergenic_region|MODIFIER|CQ053392-CQ053393|CQ053392-CQ053393|intergenic_region|CQ053392-CQ053393|||n.7598750G>A||||||
DTM	Cq2A	7616222	Cq2A_7616222	4.04e-08	C	A	intergenic_region	n.7616222C>A		A|intergenic_region|MODIFIER|CQ053393-CQ053394|CQ053393-CQ053394|intergenic_region|CQ053393-CQ053394|||n.7616222C>A||||||
DTM	Cq2A	7616233	Cq2A_7616233	3.35e-09	T	G	intergenic_region	n.7616233T>G		G|intergenic_region|MODIFIER|CQ053393-CQ053394|CQ053393-CQ053394|intergenic_region|CQ053393-CQ053394|||n.7616233T>G||||||
DTM	Cq2A	7616292	Cq2A_7616292	4.16e-10	T	C	intergenic_region	n.7616292T>C		C|intergenic_region|MODIFIER|CQ053393-CQ053394|CQ053393-CQ053394|intergenic_region|CQ053393-CQ053394|||n.7616292T>C||||||
DTM	Cq2A	7649289	Cq2A_7649289	7.58e-07	C	T	intergenic_region	n.7649289C>T		T|intergenic_region|MODIFIER|CQ053394-CQ053395|CQ053394-CQ053395|intergenic_region|CQ053394-CQ053395|||n.7649289C>T||||||
DTM	Cq2A	7654334	Cq2A_7654334	1.87e-08	T	C	intergenic_region	n.7654334T>C		C|intergenic_region|MODIFIER|CQ053394-CQ053395|CQ053394-CQ053395|intergenic_region|CQ053394-CQ053395|||n.7654334T>C||||||
DTM	Cq2A	7693518	Cq2A_7693518	7.04e-07	T	C	intergenic_region	n.7693518T>C		C|intergenic_region|MODIFIER|CQ053394-CQ053395|CQ053394-CQ053395|intergenic_region|CQ053394-CQ053395|||n.7693518T>C||||||
DTM	Cq2A	7696937	Cq2A_7696937	1e-09	G	C	intergenic_region	n.7696937G>C		C|intergenic_region|MODIFIER|CQ053394-CQ053395|CQ053394-CQ053395|intergenic_region|CQ053394-CQ053395|||n.7696937G>C||||||
DTM	Cq2A	7717568	Cq2A_7717568	3.47e-08	T	G	5_prime_UTR_premature_start_codon_gain_variant,5_prime_UTR_variant	c.-4573T>G,c.-4573T>G		G|5_prime_UTR_premature_start_codon_gain_variant|LOW|CQ053395|CQ053395|transcript|CQ053395-RA|protein_coding|4/19|c.-4573T>G||||||,G|5_prime_UTR_variant|MODIFIER|CQ053395|CQ053395|transcript|CQ053395-RA|protein_coding|4/19|c.-4573T>G|||||9259|
DTM	Cq2A	7719395	Cq2A_7719395	9.82e-10	T	G	intron_variant	c.-3395+60T>G		G|intron_variant|MODIFIER|CQ053395|CQ053395|transcript|CQ053395-RA|protein_coding|5/18|c.-3395+60T>G||||||
DTM	Cq2A	7737980	Cq2A_7737980	3.82e-07	C	T	intron_variant	c.300-327C>T		T|intron_variant|MODIFIER|CQ053396|CQ053396|transcript|CQ053396-RA|protein_coding|3/3|c.300-327C>T||||||
DTM	Cq2A	7738753	Cq2A_7738753	6.47e-10	T	A	3_prime_UTR_variant	c.*341T>A		A|3_prime_UTR_variant|MODIFIER|CQ053396|CQ053396|transcript|CQ053396-RA|protein_coding|4/4|c.*341T>A|||||341|
DTM	Cq2A	7739550	Cq2A_7739550	5.22e-08	G	A	downstream_gene_variant,intergenic_region	c.*1138G>A,n.7739550G>A		A|downstream_gene_variant|MODIFIER|CQ053396|CQ053396|transcript|CQ053396-RA|protein_coding||c.*1138G>A|||||686|,A|intergenic_region|MODIFIER|CQ053396-CQ053397|CQ053396-CQ053397|intergenic_region|CQ053396-CQ053397|||n.7739550G>A||||||
DTM	Cq2A	7741646	Cq2A_7741646	1.82e-07	C	G	downstream_gene_variant,intergenic_region	c.*3234C>G,n.7741646C>G		G|downstream_gene_variant|MODIFIER|CQ053396|CQ053396|transcript|CQ053396-RA|protein_coding||c.*3234C>G|||||2782|,G|intergenic_region|MODIFIER|CQ053396-CQ053397|CQ053396-CQ053397|intergenic_region|CQ053396-CQ053397|||n.7741646C>G||||||
DTM	Cq2A	7748703	Cq2A_7748703	1.74e-07	G	T	intergenic_region	n.7748703G>T		T|intergenic_region|MODIFIER|CQ053396-CQ053397|CQ053396-CQ053397|intergenic_region|CQ053396-CQ053397|||n.7748703G>T||||||
DTM	Cq2A	7751984	Cq2A_7751984	4e-09	T	A	intergenic_region	n.7751984T>A		A|intergenic_region|MODIFIER|CQ053396-CQ053397|CQ053396-CQ053397|intergenic_region|CQ053396-CQ053397|||n.7751984T>A||||||
DTM	Cq2A	7751990	Cq2A_7751990	3.75e-09	A	C	intergenic_region	n.7751990A>C		C|intergenic_region|MODIFIER|CQ053396-CQ053397|CQ053396-CQ053397|intergenic_region|CQ053396-CQ053397|||n.7751990A>C||||||
DTM	Cq2A	7759768	Cq2A_7759768	8.89e-09	A	G	upstream_gene_variant,intergenic_region	c.-2920A>G,n.7759768A>G		G|upstream_gene_variant|MODIFIER|CQ053397|CQ053397|transcript|CQ053397-RA|protein_coding||c.-2920A>G|||||2848|,G|intergenic_region|MODIFIER|CQ053396-CQ053397|CQ053396-CQ053397|intergenic_region|CQ053396-CQ053397|||n.7759768A>G||||||
DTM	Cq2A	7763997	Cq2A_7763997	2.79e-08	T	A	upstream_gene_variant,intron_variant	c.-1698T>A,c.265-451T>A		A|upstream_gene_variant|MODIFIER|CQ053398|CQ053398|transcript|CQ053398-RA|protein_coding||c.-1698T>A|||||1492|,A|intron_variant|MODIFIER|CQ053397|CQ053397|transcript|CQ053397-RA|protein_coding|2/3|c.265-451T>A||||||
DTM	Cq2A	7800764	Cq2A_7800764	6.05e-08	T	G	intergenic_region	n.7800764T>G		G|intergenic_region|MODIFIER|CQ053399-CQ053400|CQ053399-CQ053400|intergenic_region|CQ053399-CQ053400|||n.7800764T>G||||||
DTM	Cq2A	7844073	Cq2A_7844073	7.04e-08	A	G	downstream_gene_variant,intergenic_region	c.*3793A>G,n.7844073A>G		G|downstream_gene_variant|MODIFIER|CQ053403|CQ053403|transcript|CQ053403-RA|protein_coding||c.*3793A>G|||||3793|WARNING_TRANSCRIPT_MULTIPLE_STOP_CODONS,G|intergenic_region|MODIFIER|CQ053403-CQ053404|CQ053403-CQ053404|intergenic_region|CQ053403-CQ053404|||n.7844073A>G||||||
DTM	Cq2A	8024999	Cq2A_8024999	8.84e-11	T	C	intergenic_region	n.8024999T>C		C|intergenic_region|MODIFIER|CQ053410-CQ053411|CQ053410-CQ053411|intergenic_region|CQ053410-CQ053411|||n.8024999T>C||||||
DTM	Cq2A	8025321	Cq2A_8025321	3.62e-09	G	A	intergenic_region	n.8025321G>A		A|intergenic_region|MODIFIER|CQ053410-CQ053411|CQ053410-CQ053411|intergenic_region|CQ053410-CQ053411|||n.8025321G>A||||||
DTM	Cq2A	8077013	Cq2A_8077013	2.79e-08	T	C	intron_variant	c.132-181A>G		C|intron_variant|MODIFIER|CQ053413|CQ053413|transcript|CQ053413-RA|protein_coding|1/4|c.132-181A>G||||||
DTM	Cq2A	8080505	Cq2A_8080505	1.58e-11	G	C	upstream_gene_variant,intergenic_region	c.-2890C>G,n.8080505G>C		C|upstream_gene_variant|MODIFIER|CQ053413|CQ053413|transcript|CQ053413-RA|protein_coding||c.-2890C>G|||||2699|,C|intergenic_region|MODIFIER|CQ053413-CQ053414|CQ053413-CQ053414|intergenic_region|CQ053413-CQ053414|||n.8080505G>C||||||
DTM	Cq2A	8080510	Cq2A_8080510	1.92e-11	C	A	upstream_gene_variant,intergenic_region	c.-2895G>T,n.8080510C>A		A|upstream_gene_variant|MODIFIER|CQ053413|CQ053413|transcript|CQ053413-RA|protein_coding||c.-2895G>T|||||2704|,A|intergenic_region|MODIFIER|CQ053413-CQ053414|CQ053413-CQ053414|intergenic_region|CQ053413-CQ053414|||n.8080510C>A||||||
DTM	Cq2A	8080517	Cq2A_8080517	1.08e-10	G	A	upstream_gene_variant,intergenic_region	c.-2902C>T,n.8080517G>A		A|upstream_gene_variant|MODIFIER|CQ053413|CQ053413|transcript|CQ053413-RA|protein_coding||c.-2902C>T|||||2711|,A|intergenic_region|MODIFIER|CQ053413-CQ053414|CQ053413-CQ053414|intergenic_region|CQ053413-CQ053414|||n.8080517G>A||||||
DTM	Cq2A	8080536	Cq2A_8080536	2.44e-09	G	A	upstream_gene_variant,intergenic_region	c.-2921C>T,n.8080536G>A		A|upstream_gene_variant|MODIFIER|CQ053413|CQ053413|transcript|CQ053413-RA|protein_coding||c.-2921C>T|||||2730|,A|intergenic_region|MODIFIER|CQ053413-CQ053414|CQ053413-CQ053414|intergenic_region|CQ053413-CQ053414|||n.8080536G>A||||||
DTM	Cq2A	8080659	Cq2A_8080659	2e-08	A	G	upstream_gene_variant,intergenic_region	c.-3044T>C,n.8080659A>G		G|upstream_gene_variant|MODIFIER|CQ053413|CQ053413|transcript|CQ053413-RA|protein_coding||c.-3044T>C|||||2853|,G|intergenic_region|MODIFIER|CQ053413-CQ053414|CQ053413-CQ053414|intergenic_region|CQ053413-CQ053414|||n.8080659A>G||||||
DTM	Cq2A	8080666	Cq2A_8080666	2.99e-08	A	C	upstream_gene_variant,intergenic_region	c.-3051T>G,n.8080666A>C		C|upstream_gene_variant|MODIFIER|CQ053413|CQ053413|transcript|CQ053413-RA|protein_coding||c.-3051T>G|||||2860|,C|intergenic_region|MODIFIER|CQ053413-CQ053414|CQ053413-CQ053414|intergenic_region|CQ053413-CQ053414|||n.8080666A>C||||||
DTM	Cq2A	8080667	Cq2A_8080667	3.88e-08	C	T	upstream_gene_variant,intergenic_region	c.-3052G>A,n.8080667C>T		T|upstream_gene_variant|MODIFIER|CQ053413|CQ053413|transcript|CQ053413-RA|protein_coding||c.-3052G>A|||||2861|,T|intergenic_region|MODIFIER|CQ053413-CQ053414|CQ053413-CQ053414|intergenic_region|CQ053413-CQ053414|||n.8080667C>T||||||
DTM	Cq2A	8080689	Cq2A_8080689	1.1e-10	A	G	upstream_gene_variant,intergenic_region	c.-3074T>C,n.8080689A>G		G|upstream_gene_variant|MODIFIER|CQ053413|CQ053413|transcript|CQ053413-RA|protein_coding||c.-3074T>C|||||2883|,G|intergenic_region|MODIFIER|CQ053413-CQ053414|CQ053413-CQ053414|intergenic_region|CQ053413-CQ053414|||n.8080689A>G||||||
DTM	Cq2A	8080691	Cq2A_8080691	1.1e-10	T	G	upstream_gene_variant,intergenic_region	c.-3076A>C,n.8080691T>G		G|upstream_gene_variant|MODIFIER|CQ053413|CQ053413|transcript|CQ053413-RA|protein_coding||c.-3076A>C|||||2885|,G|intergenic_region|MODIFIER|CQ053413-CQ053414|CQ053413-CQ053414|intergenic_region|CQ053413-CQ053414|||n.8080691T>G||||||
DTM	Cq2A	8080697	Cq2A_8080697	1.19e-10	T	C	upstream_gene_variant,intergenic_region	c.-3082A>G,n.8080697T>C		C|upstream_gene_variant|MODIFIER|CQ053413|CQ053413|transcript|CQ053413-RA|protein_coding||c.-3082A>G|||||2891|,C|intergenic_region|MODIFIER|CQ053413-CQ053414|CQ053413-CQ053414|intergenic_region|CQ053413-CQ053414|||n.8080697T>C||||||
DTM	Cq2A	8080706	Cq2A_8080706	1.57e-11	A	G	upstream_gene_variant,intergenic_region	c.-3091T>C,n.8080706A>G		G|upstream_gene_variant|MODIFIER|CQ053413|CQ053413|transcript|CQ053413-RA|protein_coding||c.-3091T>C|||||2900|,G|intergenic_region|MODIFIER|CQ053413-CQ053414|CQ053413-CQ053414|intergenic_region|CQ053413-CQ053414|||n.8080706A>G||||||
DTM	Cq2A	8080707	Cq2A_8080707	1.15e-11	A	C	upstream_gene_variant,intergenic_region	c.-3092T>G,n.8080707A>C		C|upstream_gene_variant|MODIFIER|CQ053413|CQ053413|transcript|CQ053413-RA|protein_coding||c.-3092T>G|||||2901|,C|intergenic_region|MODIFIER|CQ053413-CQ053414|CQ053413-CQ053414|intergenic_region|CQ053413-CQ053414|||n.8080707A>C||||||
DTM	Cq2A	8081365	Cq2A_8081365	2.98e-07	G	A	upstream_gene_variant,intergenic_region	c.-3750C>T,n.8081365G>A		A|upstream_gene_variant|MODIFIER|CQ053413|CQ053413|transcript|CQ053413-RA|protein_coding||c.-3750C>T|||||3559|,A|intergenic_region|MODIFIER|CQ053413-CQ053414|CQ053413-CQ053414|intergenic_region|CQ053413-CQ053414|||n.8081365G>A||||||
DTM	Cq2A	8083242	Cq2A_8083242	3.52e-08	C	T	downstream_gene_variant,intergenic_region	c.*3947G>A,n.8083242C>T		T|downstream_gene_variant|MODIFIER|CQ053414|CQ053414|transcript|CQ053414-RA|protein_coding||c.*3947G>A|||||3523|,T|intergenic_region|MODIFIER|CQ053413-CQ053414|CQ053413-CQ053414|intergenic_region|CQ053413-CQ053414|||n.8083242C>T||||||
DTM	Cq2A	8084325	Cq2A_8084325	8.64e-08	A	G	downstream_gene_variant,intergenic_region	c.*2864T>C,n.8084325A>G		G|downstream_gene_variant|MODIFIER|CQ053414|CQ053414|transcript|CQ053414-RA|protein_coding||c.*2864T>C|||||2440|,G|intergenic_region|MODIFIER|CQ053413-CQ053414|CQ053413-CQ053414|intergenic_region|CQ053413-CQ053414|||n.8084325A>G||||||
DTM	Cq2A	8084393	Cq2A_8084393	2.49e-08	T	C	downstream_gene_variant,intergenic_region	c.*2796A>G,n.8084393T>C		C|downstream_gene_variant|MODIFIER|CQ053414|CQ053414|transcript|CQ053414-RA|protein_coding||c.*2796A>G|||||2372|,C|intergenic_region|MODIFIER|CQ053413-CQ053414|CQ053413-CQ053414|intergenic_region|CQ053413-CQ053414|||n.8084393T>C||||||
DTM	Cq2A	8086774	Cq2A_8086774	3.46e-09	G	A	3_prime_UTR_variant	c.*415C>T		A|3_prime_UTR_variant|MODIFIER|CQ053414|CQ053414|transcript|CQ053414-RA|protein_coding|7/7|c.*415C>T|||||415|
DTM	Cq2A	8087067	Cq2A_8087067	9.83e-10	T	A	3_prime_UTR_variant	c.*122A>T		A|3_prime_UTR_variant|MODIFIER|CQ053414|CQ053414|transcript|CQ053414-RA|protein_coding|7/7|c.*122A>T|||||122|
DTM	Cq2A	8088352	Cq2A_8088352	1e-07	C	T	intron_variant	c.703-1089G>A		T|intron_variant|MODIFIER|CQ053414|CQ053414|transcript|CQ053414-RA|protein_coding|6/6|c.703-1089G>A||||||
DTM	Cq2A	8088428	Cq2A_8088428	7.71e-08	A	G	intron_variant	c.702+1018T>C		G|intron_variant|MODIFIER|CQ053414|CQ053414|transcript|CQ053414-RA|protein_coding|6/6|c.702+1018T>C||||||
DTM	Cq2A	8088438	Cq2A_8088438	8.3e-09	T	G	intron_variant	c.702+1008A>C		G|intron_variant|MODIFIER|CQ053414|CQ053414|transcript|CQ053414-RA|protein_coding|6/6|c.702+1008A>C||||||
DTM	Cq2A	8088548	Cq2A_8088548	1.3e-09	C	A	intron_variant	c.702+898G>T		A|intron_variant|MODIFIER|CQ053414|CQ053414|transcript|CQ053414-RA|protein_coding|6/6|c.702+898G>T||||||
DTM	Cq2A	8088607	Cq2A_8088607	8.14e-08	G	A	intron_variant	c.702+839C>T		A|intron_variant|MODIFIER|CQ053414|CQ053414|transcript|CQ053414-RA|protein_coding|6/6|c.702+839C>T||||||
DTM	Cq2A	8088627	Cq2A_8088627	8.61e-08	C	T	intron_variant	c.702+819G>A		T|intron_variant|MODIFIER|CQ053414|CQ053414|transcript|CQ053414-RA|protein_coding|6/6|c.702+819G>A||||||
DTM	Cq2A	8089238	Cq2A_8089238	8.16e-07	T	C	intron_variant	c.702+208A>G		C|intron_variant|MODIFIER|CQ053414|CQ053414|transcript|CQ053414-RA|protein_coding|6/6|c.702+208A>G||||||
DTM	Cq2A	8089348	Cq2A_8089348	1.11e-07	G	A	intron_variant	c.702+98C>T		A|intron_variant|MODIFIER|CQ053414|CQ053414|transcript|CQ053414-RA|protein_coding|6/6|c.702+98C>T||||||
DTM	Cq2A	8089503	Cq2A_8089503	2.62e-08	G	T	synonymous_variant	c.645C>A	p.Thr215Thr	T|synonymous_variant|LOW|CQ053414|CQ053414|transcript|CQ053414-RA|protein_coding|6/7|c.645C>A|p.Thr215Thr|825/1381|645/777|215/258||
DTM	Cq2A	8089602	Cq2A_8089602	3.08e-07	T	C	synonymous_variant	c.546A>G	p.Gln182Gln	C|synonymous_variant|LOW|CQ053414|CQ053414|transcript|CQ053414-RA|protein_coding|6/7|c.546A>G|p.Gln182Gln|726/1381|546/777|182/258||
DTM	Cq2A	8090049	Cq2A_8090049	1.39e-09	G	T	intron_variant	c.526-427C>A		T|intron_variant|MODIFIER|CQ053414|CQ053414|transcript|CQ053414-RA|protein_coding|5/6|c.526-427C>A||||||
DTM	Cq2A	8090227	Cq2A_8090227	3.25e-07	G	A	intron_variant	c.526-605C>T		A|intron_variant|MODIFIER|CQ053414|CQ053414|transcript|CQ053414-RA|protein_coding|5/6|c.526-605C>T||||||
DTM	Cq2A	8090430	Cq2A_8090430	1.56e-10	G	T	intron_variant	c.525+803C>A		T|intron_variant|MODIFIER|CQ053414|CQ053414|transcript|CQ053414-RA|protein_coding|5/6|c.525+803C>A||||||
DTM	Cq2A	8090474	Cq2A_8090474	1.02e-11	T	C	intron_variant	c.525+759A>G		C|intron_variant|MODIFIER|CQ053414|CQ053414|transcript|CQ053414-RA|protein_coding|5/6|c.525+759A>G||||||
DTM	Cq2A	8090512	Cq2A_8090512	1.04e-12	C	A	intron_variant	c.525+721G>T		A|intron_variant|MODIFIER|CQ053414|CQ053414|transcript|CQ053414-RA|protein_coding|5/6|c.525+721G>T||||||
DTM	Cq2A	8090579	Cq2A_8090579	3.75e-11	A	G	intron_variant	c.525+654T>C		G|intron_variant|MODIFIER|CQ053414|CQ053414|transcript|CQ053414-RA|protein_coding|5/6|c.525+654T>C||||||
DTM	Cq2A	8090614	Cq2A_8090614	1.05e-11	A	C	intron_variant	c.525+619T>G		C|intron_variant|MODIFIER|CQ053414|CQ053414|transcript|CQ053414-RA|protein_coding|5/6|c.525+619T>G||||||
DTM	Cq2A	8090653	Cq2A_8090653	3.77e-09	T	C	intron_variant	c.525+580A>G		C|intron_variant|MODIFIER|CQ053414|CQ053414|transcript|CQ053414-RA|protein_coding|5/6|c.525+580A>G||||||
DTM	Cq2A	8090684	Cq2A_8090684	6.3e-12	T	G	intron_variant	c.525+549A>C		G|intron_variant|MODIFIER|CQ053414|CQ053414|transcript|CQ053414-RA|protein_coding|5/6|c.525+549A>C||||||
DTM	Cq2A	8091344	Cq2A_8091344	3.87e-09	G	A	splice_region_variant&synonymous_variant	c.414C>T	p.Phe138Phe	A|splice_region_variant&synonymous_variant|LOW|CQ053414|CQ053414|transcript|CQ053414-RA|protein_coding|5/7|c.414C>T|p.Phe138Phe|594/1381|414/777|138/258||
DTM	Cq2A	8091446	Cq2A_8091446	1.34e-10	A	C	intron_variant	c.412-100T>G		C|intron_variant|MODIFIER|CQ053414|CQ053414|transcript|CQ053414-RA|protein_coding|4/6|c.412-100T>G||||||
DTM	Cq2A	8091617	Cq2A_8091617	5.89e-11	T	G	intron_variant	c.411+56A>C		G|intron_variant|MODIFIER|CQ053414|CQ053414|transcript|CQ053414-RA|protein_coding|4/6|c.411+56A>C||||||
DTM	Cq2A	8091745	Cq2A_8091745	3.5e-09	G	A	synonymous_variant	c.339C>T	p.Thr113Thr	A|synonymous_variant|LOW|CQ053414|CQ053414|transcript|CQ053414-RA|protein_coding|4/7|c.339C>T|p.Thr113Thr|519/1381|339/777|113/258||
DTM	Cq2A	8092111	Cq2A_8092111	1.53e-09	T	A	intron_variant	c.333-360A>T		A|intron_variant|MODIFIER|CQ053414|CQ053414|transcript|CQ053414-RA|protein_coding|3/6|c.333-360A>T||||||
DTM	Cq2A	8092198	Cq2A_8092198	1.11e-08	A	G	intron_variant	c.332+281T>C		G|intron_variant|MODIFIER|CQ053414|CQ053414|transcript|CQ053414-RA|protein_coding|3/6|c.332+281T>C||||||
DTM	Cq2A	8092231	Cq2A_8092231	1.13e-08	G	T	intron_variant	c.332+248C>A		T|intron_variant|MODIFIER|CQ053414|CQ053414|transcript|CQ053414-RA|protein_coding|3/6|c.332+248C>A||||||
DTM	Cq2A	8092408	Cq2A_8092408	1.04e-10	A	T	intron_variant	c.332+71T>A		T|intron_variant|MODIFIER|CQ053414|CQ053414|transcript|CQ053414-RA|protein_coding|3/6|c.332+71T>A||||||
DTM	Cq2A	8092409	Cq2A_8092409	1.73e-10	A	G	intron_variant	c.332+70T>C		G|intron_variant|MODIFIER|CQ053414|CQ053414|transcript|CQ053414-RA|protein_coding|3/6|c.332+70T>C||||||
DTM	Cq2A	8092442	Cq2A_8092442	4.04e-09	T	C	intron_variant	c.332+37A>G		C|intron_variant|MODIFIER|CQ053414|CQ053414|transcript|CQ053414-RA|protein_coding|3/6|c.332+37A>G||||||
DTM	Cq2A	8092470	Cq2A_8092470	6.35e-09	T	C	intron_variant	c.332+9A>G		C|intron_variant|MODIFIER|CQ053414|CQ053414|transcript|CQ053414-RA|protein_coding|3/6|c.332+9A>G||||||
DTM	Cq2A	8092739	Cq2A_8092739	8.3e-09	G	A	intron_variant	c.171-99C>T		A|intron_variant|MODIFIER|CQ053414|CQ053414|transcript|CQ053414-RA|protein_coding|2/6|c.171-99C>T||||||
DTM	Cq2A	8092767	Cq2A_8092767	1.01e-09	G	A	intron_variant	c.171-127C>T		A|intron_variant|MODIFIER|CQ053414|CQ053414|transcript|CQ053414-RA|protein_coding|2/6|c.171-127C>T||||||
DTM	Cq2A	8092770	Cq2A_8092770	3.74e-09	A	T	intron_variant	c.171-130T>A		T|intron_variant|MODIFIER|CQ053414|CQ053414|transcript|CQ053414-RA|protein_coding|2/6|c.171-130T>A||||||
DTM	Cq2A	8092791	Cq2A_8092791	2.14e-08	A	T	intron_variant	c.171-151T>A		T|intron_variant|MODIFIER|CQ053414|CQ053414|transcript|CQ053414-RA|protein_coding|2/6|c.171-151T>A||||||
DTM	Cq2A	8092835	Cq2A_8092835	2.23e-07	T	C	intron_variant	c.171-195A>G		C|intron_variant|MODIFIER|CQ053414|CQ053414|transcript|CQ053414-RA|protein_coding|2/6|c.171-195A>G||||||
DTM	Cq2A	8092915	Cq2A_8092915	4.45e-08	C	T	intron_variant	c.171-275G>A		T|intron_variant|MODIFIER|CQ053414|CQ053414|transcript|CQ053414-RA|protein_coding|2/6|c.171-275G>A||||||
DTM	Cq2A	8093035	Cq2A_8093035	7.85e-08	A	G	intron_variant	c.171-395T>C		G|intron_variant|MODIFIER|CQ053414|CQ053414|transcript|CQ053414-RA|protein_coding|2/6|c.171-395T>C||||||
DTM	Cq2A	8093181	Cq2A_8093181	2.79e-08	C	A	intron_variant	c.171-541G>T		A|intron_variant|MODIFIER|CQ053414|CQ053414|transcript|CQ053414-RA|protein_coding|2/6|c.171-541G>T||||||
DTM	Cq2A	8093443	Cq2A_8093443	2.33e-09	T	A	intron_variant	c.170+634A>T		A|intron_variant|MODIFIER|CQ053414|CQ053414|transcript|CQ053414-RA|protein_coding|2/6|c.170+634A>T||||||
DTM	Cq2A	8093485	Cq2A_8093485	3.05e-09	C	T	intron_variant	c.170+592G>A		T|intron_variant|MODIFIER|CQ053414|CQ053414|transcript|CQ053414-RA|protein_coding|2/6|c.170+592G>A||||||
DTM	Cq2A	8093529	Cq2A_8093529	3.85e-11	T	C	intron_variant	c.170+548A>G		C|intron_variant|MODIFIER|CQ053414|CQ053414|transcript|CQ053414-RA|protein_coding|2/6|c.170+548A>G||||||
DTM	Cq2A	8093547	Cq2A_8093547	4.16e-13	C	G	intron_variant	c.170+530G>C		G|intron_variant|MODIFIER|CQ053414|CQ053414|transcript|CQ053414-RA|protein_coding|2/6|c.170+530G>C||||||
DTM	Cq2A	8095642	Cq2A_8095642	3.77e-11	C	T	upstream_gene_variant,intergenic_region	c.-1272G>A,n.8095642C>T		T|upstream_gene_variant|MODIFIER|CQ053414|CQ053414|transcript|CQ053414-RA|protein_coding||c.-1272G>A|||||1092|,T|intergenic_region|MODIFIER|CQ053414-CQ053415|CQ053414-CQ053415|intergenic_region|CQ053414-CQ053415|||n.8095642C>T||||||
DTM	Cq2A	8095650	Cq2A_8095650	4.61e-09	T	C	upstream_gene_variant,intergenic_region	c.-1280A>G,n.8095650T>C		C|upstream_gene_variant|MODIFIER|CQ053414|CQ053414|transcript|CQ053414-RA|protein_coding||c.-1280A>G|||||1100|,C|intergenic_region|MODIFIER|CQ053414-CQ053415|CQ053414-CQ053415|intergenic_region|CQ053414-CQ053415|||n.8095650T>C||||||
DTM	Cq2A	8095656	Cq2A_8095656	5.13e-09	A	C	upstream_gene_variant,intergenic_region	c.-1286T>G,n.8095656A>C		C|upstream_gene_variant|MODIFIER|CQ053414|CQ053414|transcript|CQ053414-RA|protein_coding||c.-1286T>G|||||1106|,C|intergenic_region|MODIFIER|CQ053414-CQ053415|CQ053414-CQ053415|intergenic_region|CQ053414-CQ053415|||n.8095656A>C||||||
DTM	Cq2A	8096902	Cq2A_8096902	7.2e-08	C	T	upstream_gene_variant,intergenic_region	c.-2532G>A,n.8096902C>T		T|upstream_gene_variant|MODIFIER|CQ053414|CQ053414|transcript|CQ053414-RA|protein_coding||c.-2532G>A|||||2352|,T|intergenic_region|MODIFIER|CQ053414-CQ053415|CQ053414-CQ053415|intergenic_region|CQ053414-CQ053415|||n.8096902C>T||||||
DTM	Cq2A	8098058	Cq2A_8098058	6.11e-11	A	C	upstream_gene_variant,intergenic_region	c.-3688T>G,n.8098058A>C		C|upstream_gene_variant|MODIFIER|CQ053414|CQ053414|transcript|CQ053414-RA|protein_coding||c.-3688T>G|||||3508|,C|intergenic_region|MODIFIER|CQ053414-CQ053415|CQ053414-CQ053415|intergenic_region|CQ053414-CQ053415|||n.8098058A>C||||||
DTM	Cq2A	8098368	Cq2A_8098368	1.01e-07	G	A	upstream_gene_variant,intergenic_region	c.-3998C>T,n.8098368G>A		A|upstream_gene_variant|MODIFIER|CQ053414|CQ053414|transcript|CQ053414-RA|protein_coding||c.-3998C>T|||||3818|,A|intergenic_region|MODIFIER|CQ053414-CQ053415|CQ053414-CQ053415|intergenic_region|CQ053414-CQ053415|||n.8098368G>A||||||
DTM	Cq2A	8098901	Cq2A_8098901	2.42e-07	C	T	upstream_gene_variant,intergenic_region	c.-4531G>A,n.8098901C>T		T|upstream_gene_variant|MODIFIER|CQ053414|CQ053414|transcript|CQ053414-RA|protein_coding||c.-4531G>A|||||4351|,T|intergenic_region|MODIFIER|CQ053414-CQ053415|CQ053414-CQ053415|intergenic_region|CQ053414-CQ053415|||n.8098901C>T||||||
DTM	Cq2A	8100362	Cq2A_8100362	2.73e-11	C	G	intergenic_region	n.8100362C>G		G|intergenic_region|MODIFIER|CQ053414-CQ053415|CQ053414-CQ053415|intergenic_region|CQ053414-CQ053415|||n.8100362C>G||||||
DTM	Cq2A	8100705	Cq2A_8100705	5.26e-09	G	A	intergenic_region	n.8100705G>A		A|intergenic_region|MODIFIER|CQ053414-CQ053415|CQ053414-CQ053415|intergenic_region|CQ053414-CQ053415|||n.8100705G>A||||||
DTM	Cq2A	8100740	Cq2A_8100740	5.49e-09	A	G	intergenic_region	n.8100740A>G		G|intergenic_region|MODIFIER|CQ053414-CQ053415|CQ053414-CQ053415|intergenic_region|CQ053414-CQ053415|||n.8100740A>G||||||
DTM	Cq2A	8100769	Cq2A_8100769	5.91e-09	G	A	intergenic_region	n.8100769G>A		A|intergenic_region|MODIFIER|CQ053414-CQ053415|CQ053414-CQ053415|intergenic_region|CQ053414-CQ053415|||n.8100769G>A||||||
DTM	Cq2A	8100801	Cq2A_8100801	2.08e-09	G	A	intergenic_region	n.8100801G>A		A|intergenic_region|MODIFIER|CQ053414-CQ053415|CQ053414-CQ053415|intergenic_region|CQ053414-CQ053415|||n.8100801G>A||||||
DTM	Cq2A	8100824	Cq2A_8100824	1.24e-08	G	A	intergenic_region	n.8100824G>A		A|intergenic_region|MODIFIER|CQ053414-CQ053415|CQ053414-CQ053415|intergenic_region|CQ053414-CQ053415|||n.8100824G>A||||||
DTM	Cq2A	8100858	Cq2A_8100858	9.27e-09	A	G	intergenic_region	n.8100858A>G		G|intergenic_region|MODIFIER|CQ053414-CQ053415|CQ053414-CQ053415|intergenic_region|CQ053414-CQ053415|||n.8100858A>G||||||
DTM	Cq2A	8100888	Cq2A_8100888	3.37e-08	A	G	intergenic_region	n.8100888A>G		G|intergenic_region|MODIFIER|CQ053414-CQ053415|CQ053414-CQ053415|intergenic_region|CQ053414-CQ053415|||n.8100888A>G||||||
DTM	Cq2A	8100988	Cq2A_8100988	1.61e-08	G	A	intergenic_region	n.8100988G>A		A|intergenic_region|MODIFIER|CQ053414-CQ053415|CQ053414-CQ053415|intergenic_region|CQ053414-CQ053415|||n.8100988G>A||||||
DTM	Cq2A	8101001	Cq2A_8101001	6.02e-08	A	G	intergenic_region	n.8101001A>G		G|intergenic_region|MODIFIER|CQ053414-CQ053415|CQ053414-CQ053415|intergenic_region|CQ053414-CQ053415|||n.8101001A>G||||||
DTM	Cq2A	8101026	Cq2A_8101026	9.4e-08	A	G	intergenic_region	n.8101026A>G		G|intergenic_region|MODIFIER|CQ053414-CQ053415|CQ053414-CQ053415|intergenic_region|CQ053414-CQ053415|||n.8101026A>G||||||
DTM	Cq2A	8101129	Cq2A_8101129	7.89e-09	G	C	intergenic_region	n.8101129G>C		C|intergenic_region|MODIFIER|CQ053414-CQ053415|CQ053414-CQ053415|intergenic_region|CQ053414-CQ053415|||n.8101129G>C||||||
DTM	Cq2A	8101350	Cq2A_8101350	1.11e-11	C	T	intergenic_region	n.8101350C>T		T|intergenic_region|MODIFIER|CQ053414-CQ053415|CQ053414-CQ053415|intergenic_region|CQ053414-CQ053415|||n.8101350C>T||||||
DTM	Cq2A	8101359	Cq2A_8101359	2.99e-10	A	G	intergenic_region	n.8101359A>G		G|intergenic_region|MODIFIER|CQ053414-CQ053415|CQ053414-CQ053415|intergenic_region|CQ053414-CQ053415|||n.8101359A>G||||||
DTM	Cq2A	8101405	Cq2A_8101405	6.54e-11	G	A	intergenic_region	n.8101405G>A		A|intergenic_region|MODIFIER|CQ053414-CQ053415|CQ053414-CQ053415|intergenic_region|CQ053414-CQ053415|||n.8101405G>A||||||
DTM	Cq2A	8101414	Cq2A_8101414	3.06e-09	A	G	intergenic_region	n.8101414A>G		G|intergenic_region|MODIFIER|CQ053414-CQ053415|CQ053414-CQ053415|intergenic_region|CQ053414-CQ053415|||n.8101414A>G||||||
DTM	Cq2A	8101912	Cq2A_8101912	3.1e-08	G	A	intergenic_region	n.8101912G>A		A|intergenic_region|MODIFIER|CQ053414-CQ053415|CQ053414-CQ053415|intergenic_region|CQ053414-CQ053415|||n.8101912G>A||||||
DTM	Cq2A	8101949	Cq2A_8101949	7.33e-12	G	A	intergenic_region	n.8101949G>A		A|intergenic_region|MODIFIER|CQ053414-CQ053415|CQ053414-CQ053415|intergenic_region|CQ053414-CQ053415|||n.8101949G>A||||||
DTM	Cq2A	8102372	Cq2A_8102372	4.16e-12	C	T	intergenic_region	n.8102372C>T		T|intergenic_region|MODIFIER|CQ053414-CQ053415|CQ053414-CQ053415|intergenic_region|CQ053414-CQ053415|||n.8102372C>T||||||
DTM	Cq2A	8102530	Cq2A_8102530	7.86e-09	A	G	intergenic_region	n.8102530A>G		G|intergenic_region|MODIFIER|CQ053414-CQ053415|CQ053414-CQ053415|intergenic_region|CQ053414-CQ053415|||n.8102530A>G||||||
DTM	Cq2A	8102563	Cq2A_8102563	1.84e-08	C	T	intergenic_region	n.8102563C>T		T|intergenic_region|MODIFIER|CQ053414-CQ053415|CQ053414-CQ053415|intergenic_region|CQ053414-CQ053415|||n.8102563C>T||||||
DTM	Cq2A	8102628	Cq2A_8102628	1.62e-07	C	T	intergenic_region	n.8102628C>T		T|intergenic_region|MODIFIER|CQ053414-CQ053415|CQ053414-CQ053415|intergenic_region|CQ053414-CQ053415|||n.8102628C>T||||||
DTM	Cq2A	8102644	Cq2A_8102644	7.01e-08	T	G	intergenic_region	n.8102644T>G		G|intergenic_region|MODIFIER|CQ053414-CQ053415|CQ053414-CQ053415|intergenic_region|CQ053414-CQ053415|||n.8102644T>G||||||
DTM	Cq2A	8102695	Cq2A_8102695	5.73e-10	G	A	intergenic_region	n.8102695G>A		A|intergenic_region|MODIFIER|CQ053414-CQ053415|CQ053414-CQ053415|intergenic_region|CQ053414-CQ053415|||n.8102695G>A||||||
DTM	Cq2A	8103050	Cq2A_8103050	1.54e-07	C	T	intergenic_region	n.8103050C>T		T|intergenic_region|MODIFIER|CQ053414-CQ053415|CQ053414-CQ053415|intergenic_region|CQ053414-CQ053415|||n.8103050C>T||||||
DTM	Cq2A	8103082	Cq2A_8103082	1.14e-07	A	C	intergenic_region	n.8103082A>C		C|intergenic_region|MODIFIER|CQ053414-CQ053415|CQ053414-CQ053415|intergenic_region|CQ053414-CQ053415|||n.8103082A>C||||||
DTM	Cq2A	8103150	Cq2A_8103150	3.97e-08	C	A	intergenic_region	n.8103150C>A		A|intergenic_region|MODIFIER|CQ053414-CQ053415|CQ053414-CQ053415|intergenic_region|CQ053414-CQ053415|||n.8103150C>A||||||
DTM	Cq2A	8103153	Cq2A_8103153	3.97e-08	C	T	intergenic_region	n.8103153C>T		T|intergenic_region|MODIFIER|CQ053414-CQ053415|CQ053414-CQ053415|intergenic_region|CQ053414-CQ053415|||n.8103153C>T||||||
DTM	Cq2A	8103514	Cq2A_8103514	2.75e-08	C	A	intergenic_region	n.8103514C>A		A|intergenic_region|MODIFIER|CQ053414-CQ053415|CQ053414-CQ053415|intergenic_region|CQ053414-CQ053415|||n.8103514C>A||||||
DTM	Cq2A	8103734	Cq2A_8103734	3.2e-10	T	C	intergenic_region	n.8103734T>C		C|intergenic_region|MODIFIER|CQ053414-CQ053415|CQ053414-CQ053415|intergenic_region|CQ053414-CQ053415|||n.8103734T>C||||||
DTM	Cq2A	8103741	Cq2A_8103741	1.83e-10	C	T	intergenic_region	n.8103741C>T		T|intergenic_region|MODIFIER|CQ053414-CQ053415|CQ053414-CQ053415|intergenic_region|CQ053414-CQ053415|||n.8103741C>T||||||
DTM	Cq2A	8103985	Cq2A_8103985	1.99e-09	G	A	intergenic_region	n.8103985G>A		A|intergenic_region|MODIFIER|CQ053414-CQ053415|CQ053414-CQ053415|intergenic_region|CQ053414-CQ053415|||n.8103985G>A||||||
DTM	Cq2A	8104360	Cq2A_8104360	8.77e-08	G	A	intergenic_region	n.8104360G>A		A|intergenic_region|MODIFIER|CQ053414-CQ053415|CQ053414-CQ053415|intergenic_region|CQ053414-CQ053415|||n.8104360G>A||||||
DTM	Cq2A	8104427	Cq2A_8104427	9.1e-09	C	T	intergenic_region	n.8104427C>T		T|intergenic_region|MODIFIER|CQ053414-CQ053415|CQ053414-CQ053415|intergenic_region|CQ053414-CQ053415|||n.8104427C>T||||||
DTM	Cq2A	8104433	Cq2A_8104433	2.15e-09	G	A	intergenic_region	n.8104433G>A		A|intergenic_region|MODIFIER|CQ053414-CQ053415|CQ053414-CQ053415|intergenic_region|CQ053414-CQ053415|||n.8104433G>A||||||
DTM	Cq2A	8104537	Cq2A_8104537	1.09e-08	C	T	intergenic_region	n.8104537C>T		T|intergenic_region|MODIFIER|CQ053414-CQ053415|CQ053414-CQ053415|intergenic_region|CQ053414-CQ053415|||n.8104537C>T||||||
DTM	Cq2A	8104612	Cq2A_8104612	1.56e-07	A	G	intergenic_region	n.8104612A>G		G|intergenic_region|MODIFIER|CQ053414-CQ053415|CQ053414-CQ053415|intergenic_region|CQ053414-CQ053415|||n.8104612A>G||||||
DTM	Cq2A	8104773	Cq2A_8104773	1.5e-07	A	T	intergenic_region	n.8104773A>T		T|intergenic_region|MODIFIER|CQ053414-CQ053415|CQ053414-CQ053415|intergenic_region|CQ053414-CQ053415|||n.8104773A>T||||||
DTM	Cq2A	8105049	Cq2A_8105049	3.68e-07	C	T	intergenic_region	n.8105049C>T		T|intergenic_region|MODIFIER|CQ053414-CQ053415|CQ053414-CQ053415|intergenic_region|CQ053414-CQ053415|||n.8105049C>T||||||
DTM	Cq2A	8105140	Cq2A_8105140	7.76e-08	G	A	intergenic_region	n.8105140G>A		A|intergenic_region|MODIFIER|CQ053414-CQ053415|CQ053414-CQ053415|intergenic_region|CQ053414-CQ053415|||n.8105140G>A||||||
DTM	Cq2A	8105284	Cq2A_8105284	7.19e-08	G	A	intergenic_region	n.8105284G>A		A|intergenic_region|MODIFIER|CQ053414-CQ053415|CQ053414-CQ053415|intergenic_region|CQ053414-CQ053415|||n.8105284G>A||||||
DTM	Cq2A	8105309	Cq2A_8105309	2.79e-08	T	C	intergenic_region	n.8105309T>C		C|intergenic_region|MODIFIER|CQ053414-CQ053415|CQ053414-CQ053415|intergenic_region|CQ053414-CQ053415|||n.8105309T>C||||||
DTM	Cq2A	8105539	Cq2A_8105539	5.64e-11	C	T	intergenic_region	n.8105539C>T		T|intergenic_region|MODIFIER|CQ053414-CQ053415|CQ053414-CQ053415|intergenic_region|CQ053414-CQ053415|||n.8105539C>T||||||
DTM	Cq2A	8105846	Cq2A_8105846	3.4e-11	G	A	intergenic_region	n.8105846G>A		A|intergenic_region|MODIFIER|CQ053414-CQ053415|CQ053414-CQ053415|intergenic_region|CQ053414-CQ053415|||n.8105846G>A||||||
DTM	Cq2A	8110071	Cq2A_8110071	2.28e-09	C	T	intergenic_region	n.8110071C>T		T|intergenic_region|MODIFIER|CQ053414-CQ053415|CQ053414-CQ053415|intergenic_region|CQ053414-CQ053415|||n.8110071C>T||||||
DTM	Cq2A	8111563	Cq2A_8111563	6.69e-09	T	C	intergenic_region	n.8111563T>C		C|intergenic_region|MODIFIER|CQ053414-CQ053415|CQ053414-CQ053415|intergenic_region|CQ053414-CQ053415|||n.8111563T>C||||||
DTM	Cq2A	8111611	Cq2A_8111611	4.8e-09	T	G	intergenic_region	n.8111611T>G		G|intergenic_region|MODIFIER|CQ053414-CQ053415|CQ053414-CQ053415|intergenic_region|CQ053414-CQ053415|||n.8111611T>G||||||
DTM	Cq2A	8111634	Cq2A_8111634	7.89e-09	C	T	intergenic_region	n.8111634C>T		T|intergenic_region|MODIFIER|CQ053414-CQ053415|CQ053414-CQ053415|intergenic_region|CQ053414-CQ053415|||n.8111634C>T||||||
DTM	Cq2A	8111657	Cq2A_8111657	1.82e-10	T	C	intergenic_region	n.8111657T>C		C|intergenic_region|MODIFIER|CQ053414-CQ053415|CQ053414-CQ053415|intergenic_region|CQ053414-CQ053415|||n.8111657T>C||||||
DTM	Cq2A	8111742	Cq2A_8111742	5.12e-10	C	T	intergenic_region	n.8111742C>T		T|intergenic_region|MODIFIER|CQ053414-CQ053415|CQ053414-CQ053415|intergenic_region|CQ053414-CQ053415|||n.8111742C>T||||||
DTM	Cq2A	8112095	Cq2A_8112095	8.78e-09	A	G	intergenic_region	n.8112095A>G		G|intergenic_region|MODIFIER|CQ053414-CQ053415|CQ053414-CQ053415|intergenic_region|CQ053414-CQ053415|||n.8112095A>G||||||
DTM	Cq2A	8112121	Cq2A_8112121	2.31e-09	T	A	intergenic_region	n.8112121T>A		A|intergenic_region|MODIFIER|CQ053414-CQ053415|CQ053414-CQ053415|intergenic_region|CQ053414-CQ053415|||n.8112121T>A||||||
DTM	Cq2A	8112137	Cq2A_8112137	1.2e-07	A	G	intergenic_region	n.8112137A>G		G|intergenic_region|MODIFIER|CQ053414-CQ053415|CQ053414-CQ053415|intergenic_region|CQ053414-CQ053415|||n.8112137A>G||||||
DTM	Cq2A	8112202	Cq2A_8112202	1.04e-09	T	C	intergenic_region	n.8112202T>C		C|intergenic_region|MODIFIER|CQ053414-CQ053415|CQ053414-CQ053415|intergenic_region|CQ053414-CQ053415|||n.8112202T>C||||||
DTM	Cq2A	8112232	Cq2A_8112232	3.78e-08	T	C	intergenic_region	n.8112232T>C		C|intergenic_region|MODIFIER|CQ053414-CQ053415|CQ053414-CQ053415|intergenic_region|CQ053414-CQ053415|||n.8112232T>C||||||
DTM	Cq2A	8112234	Cq2A_8112234	3.78e-08	G	A	intergenic_region	n.8112234G>A		A|intergenic_region|MODIFIER|CQ053414-CQ053415|CQ053414-CQ053415|intergenic_region|CQ053414-CQ053415|||n.8112234G>A||||||
DTM	Cq2A	8112240	Cq2A_8112240	5.68e-08	C	T	intergenic_region	n.8112240C>T		T|intergenic_region|MODIFIER|CQ053414-CQ053415|CQ053414-CQ053415|intergenic_region|CQ053414-CQ053415|||n.8112240C>T||||||
DTM	Cq2A	8113265	Cq2A_8113265	8.34e-07	T	G	intergenic_region	n.8113265T>G		G|intergenic_region|MODIFIER|CQ053414-CQ053415|CQ053414-CQ053415|intergenic_region|CQ053414-CQ053415|||n.8113265T>G||||||
DTM	Cq2A	8115362	Cq2A_8115362	6.65e-08	G	T	intergenic_region	n.8115362G>T		T|intergenic_region|MODIFIER|CQ053414-CQ053415|CQ053414-CQ053415|intergenic_region|CQ053414-CQ053415|||n.8115362G>T||||||
DTM	Cq2A	8115444	Cq2A_8115444	1.02e-09	G	A	intergenic_region	n.8115444G>A		A|intergenic_region|MODIFIER|CQ053414-CQ053415|CQ053414-CQ053415|intergenic_region|CQ053414-CQ053415|||n.8115444G>A||||||
DTM	Cq2A	8115470	Cq2A_8115470	4.06e-11	A	C	intergenic_region	n.8115470A>C		C|intergenic_region|MODIFIER|CQ053414-CQ053415|CQ053414-CQ053415|intergenic_region|CQ053414-CQ053415|||n.8115470A>C||||||
DTM	Cq2A	8115471	Cq2A_8115471	4.06e-11	T	C	intergenic_region	n.8115471T>C		C|intergenic_region|MODIFIER|CQ053414-CQ053415|CQ053414-CQ053415|intergenic_region|CQ053414-CQ053415|||n.8115471T>C||||||
DTM	Cq2A	8115621	Cq2A_8115621	5.93e-07	C	T	intergenic_region	n.8115621C>T		T|intergenic_region|MODIFIER|CQ053414-CQ053415|CQ053414-CQ053415|intergenic_region|CQ053414-CQ053415|||n.8115621C>T||||||
DTM	Cq2A	8115711	Cq2A_8115711	2.01e-07	C	T	intergenic_region	n.8115711C>T		T|intergenic_region|MODIFIER|CQ053414-CQ053415|CQ053414-CQ053415|intergenic_region|CQ053414-CQ053415|||n.8115711C>T||||||
DTM	Cq2A	8116510	Cq2A_8116510	1.59e-09	C	G	intergenic_region	n.8116510C>G		G|intergenic_region|MODIFIER|CQ053414-CQ053415|CQ053414-CQ053415|intergenic_region|CQ053414-CQ053415|||n.8116510C>G||||||
DTM	Cq2A	8116642	Cq2A_8116642	6.4e-09	T	C	intergenic_region	n.8116642T>C		C|intergenic_region|MODIFIER|CQ053414-CQ053415|CQ053414-CQ053415|intergenic_region|CQ053414-CQ053415|||n.8116642T>C||||||
DTM	Cq2A	8116733	Cq2A_8116733	4.97e-09	A	G	intergenic_region	n.8116733A>G		G|intergenic_region|MODIFIER|CQ053414-CQ053415|CQ053414-CQ053415|intergenic_region|CQ053414-CQ053415|||n.8116733A>G||||||
DTM	Cq2A	8133976	Cq2A_8133976	6.84e-09	G	A	downstream_gene_variant,downstream_gene_variant,intergenic_region	c.*839G>A,c.*3452C>T,n.8133976G>A		A|downstream_gene_variant|MODIFIER|CQ053415|CQ053415|transcript|CQ053415-RA|protein_coding||c.*839G>A|||||464|,A|downstream_gene_variant|MODIFIER|CQ053417|CQ053417|transcript|CQ053417-RA|protein_coding||c.*3452C>T|||||3452|WARNING_TRANSCRIPT_INCOMPLETE,A|intergenic_region|MODIFIER|CQ053415-CQ053417|CQ053415-CQ053417|intergenic_region|CQ053415-CQ053417|||n.8133976G>A||||||
DTM	Cq2A	8137455	Cq2A_8137455	2.44e-08	C	T	missense_variant,downstream_gene_variant	c.44G>A,c.*4318C>T	p.Arg15Lys,.	T|missense_variant|MODERATE|CQ053417|CQ053417|transcript|CQ053417-RA|protein_coding|1/1|c.44G>A|p.Arg15Lys|44/71|44/71|15/22||WARNING_TRANSCRIPT_INCOMPLETE,T|downstream_gene_variant|MODIFIER|CQ053415|CQ053415|transcript|CQ053415-RA|protein_coding||c.*4318C>T|||||3943|
DTM	Cq2A	8137928	Cq2A_8137928	3.38e-08	G	A	upstream_gene_variant,downstream_gene_variant,intergenic_region	c.-430C>T,c.*4791G>A,n.8137928G>A		A|upstream_gene_variant|MODIFIER|CQ053417|CQ053417|transcript|CQ053417-RA|protein_coding||c.-430C>T|||||430|WARNING_TRANSCRIPT_INCOMPLETE,A|downstream_gene_variant|MODIFIER|CQ053415|CQ053415|transcript|CQ053415-RA|protein_coding||c.*4791G>A|||||4416|,A|intergenic_region|MODIFIER|CQ053417-CQ053418|CQ053417-CQ053418|intergenic_region|CQ053417-CQ053418|||n.8137928G>A||||||
DTM	Cq2A	8138397	Cq2A_8138397	5.03e-07	C	T	upstream_gene_variant,downstream_gene_variant,intergenic_region	c.-899G>A,c.*5260C>T,n.8138397C>T		T|upstream_gene_variant|MODIFIER|CQ053417|CQ053417|transcript|CQ053417-RA|protein_coding||c.-899G>A|||||899|WARNING_TRANSCRIPT_INCOMPLETE,T|downstream_gene_variant|MODIFIER|CQ053415|CQ053415|transcript|CQ053415-RA|protein_coding||c.*5260C>T|||||4885|,T|intergenic_region|MODIFIER|CQ053417-CQ053418|CQ053417-CQ053418|intergenic_region|CQ053417-CQ053418|||n.8138397C>T||||||
DTM	Cq2A	8139322	Cq2A_8139322	8.71e-07	T	C	upstream_gene_variant,intergenic_region	c.-1824A>G,n.8139322T>C		C|upstream_gene_variant|MODIFIER|CQ053417|CQ053417|transcript|CQ053417-RA|protein_coding||c.-1824A>G|||||1824|WARNING_TRANSCRIPT_INCOMPLETE,C|intergenic_region|MODIFIER|CQ053417-CQ053418|CQ053417-CQ053418|intergenic_region|CQ053417-CQ053418|||n.8139322T>C||||||
DTM	Cq2A	8140192	Cq2A_8140192	5.25e-07	C	T	upstream_gene_variant,intergenic_region	c.-2694G>A,n.8140192C>T		T|upstream_gene_variant|MODIFIER|CQ053417|CQ053417|transcript|CQ053417-RA|protein_coding||c.-2694G>A|||||2694|WARNING_TRANSCRIPT_INCOMPLETE,T|intergenic_region|MODIFIER|CQ053417-CQ053418|CQ053417-CQ053418|intergenic_region|CQ053417-CQ053418|||n.8140192C>T||||||
DTM	Cq2A	8142666	Cq2A_8142666	1.72e-08	G	T	intergenic_region	n.8142666G>T		T|intergenic_region|MODIFIER|CQ053417-CQ053418|CQ053417-CQ053418|intergenic_region|CQ053417-CQ053418|||n.8142666G>T||||||
DTM	Cq2A	8146043	Cq2A_8146043	2.35e-07	G	A	intergenic_region	n.8146043G>A		A|intergenic_region|MODIFIER|CQ053417-CQ053418|CQ053417-CQ053418|intergenic_region|CQ053417-CQ053418|||n.8146043G>A||||||
DTM	Cq2A	8146197	Cq2A_8146197	1.36e-08	G	A	intergenic_region	n.8146197G>A		A|intergenic_region|MODIFIER|CQ053417-CQ053418|CQ053417-CQ053418|intergenic_region|CQ053417-CQ053418|||n.8146197G>A||||||
DTM	Cq2A	8146209	Cq2A_8146209	1.65e-09	G	A	intergenic_region	n.8146209G>A		A|intergenic_region|MODIFIER|CQ053417-CQ053418|CQ053417-CQ053418|intergenic_region|CQ053417-CQ053418|||n.8146209G>A||||||
DTM	Cq2A	8146229	Cq2A_8146229	5.34e-08	T	A	intergenic_region	n.8146229T>A		A|intergenic_region|MODIFIER|CQ053417-CQ053418|CQ053417-CQ053418|intergenic_region|CQ053417-CQ053418|||n.8146229T>A||||||
DTM	Cq2A	8153878	Cq2A_8153878	8.8e-09	C	T	upstream_gene_variant,intergenic_region	c.-2532C>T,n.8153878C>T		T|upstream_gene_variant|MODIFIER|CQ053418|CQ053418|transcript|CQ053418-RA|protein_coding||c.-2532C>T|||||2532|,T|intergenic_region|MODIFIER|CQ053417-CQ053418|CQ053417-CQ053418|intergenic_region|CQ053417-CQ053418|||n.8153878C>T||||||
DTM	Cq2A	8161689	Cq2A_8161689	5.37e-09	T	C	missense_variant	c.2255T>C	p.Leu752Pro	C|missense_variant|MODERATE|CQ053418|CQ053418|transcript|CQ053418-RA|protein_coding|6/13|c.2255T>C|p.Leu752Pro|2255/7459|2255/4635|752/1544||
DTM	Cq2A	8164912	Cq2A_8164912	6.86e-08	A	G	missense_variant	c.3494A>G	p.Gln1165Arg	G|missense_variant|MODERATE|CQ053418|CQ053418|transcript|CQ053418-RA|protein_coding|8/13|c.3494A>G|p.Gln1165Arg|3494/7459|3494/4635|1165/1544||
DTM	Cq2A	8595866	Cq2A_8595866	4.82e-08	T	C	intergenic_region	n.8595866T>C		C|intergenic_region|MODIFIER|CQ053441-CQ053442|CQ053441-CQ053442|intergenic_region|CQ053441-CQ053442|||n.8595866T>C||||||
DTM	Cq2A	8800991	Cq2A_8800991	5.04e-07	A	C	intron_variant	c.1078+78T>G		C|intron_variant|MODIFIER|CQ053451|CQ053451|transcript|CQ053451-RA|protein_coding|2/10|c.1078+78T>G||||||
DTM	Cq2A	11627727	Cq2A_11627727	4.8e-08	C	T	intergenic_region	n.11627727C>T		T|intergenic_region|MODIFIER|CQ053573-CQ053574|CQ053573-CQ053574|intergenic_region|CQ053573-CQ053574|||n.11627727C>T||||||
DTM	Cq2A	16014258	Cq2A_16014258	2.33e-09	A	C	intergenic_region	n.16014258A>C		C|intergenic_region|MODIFIER|CQ053762-CQ053764|CQ053762-CQ053764|intergenic_region|CQ053762-CQ053764|||n.16014258A>C||||||
DTM	Cq2A	17131300	Cq2A_17131300	2.46e-07	T	G	downstream_gene_variant,intergenic_region	c.*3696A>C,n.17131300T>G		G|downstream_gene_variant|MODIFIER|CQ053800|CQ053800|transcript|CQ053800-RA|protein_coding||c.*3696A>C|||||3295|,G|intergenic_region|MODIFIER|CQ053799-CQ053800|CQ053799-CQ053800|intergenic_region|CQ053799-CQ053800|||n.17131300T>G||||||
DTM	Cq2A	34714337	Cq2A_34714337	1.03e-07	C	T	intron_variant	c.864+14C>T		T|intron_variant|MODIFIER|CQ054216|CQ054216|transcript|CQ054216-RA|protein_coding|13/21|c.864+14C>T||||||
DTM	Cq2A	35706947	Cq2A_35706947	1.19e-07	A	C	intergenic_region	n.35706947A>C		C|intergenic_region|MODIFIER|CQ054257-CQ054258|CQ054257-CQ054258|intergenic_region|CQ054257-CQ054258|||n.35706947A>C||||||
DTM	Cq2A	35725840	Cq2A_35725840	6e-07	T	G	upstream_gene_variant,upstream_gene_variant,intergenic_region	c.-4275A>C,c.-3940T>G,n.35725840T>G		G|upstream_gene_variant|MODIFIER|CQ054259|CQ054259|transcript|CQ054259-RA|protein_coding||c.-4275A>C|||||4275|,G|upstream_gene_variant|MODIFIER|CQ054260|CQ054260|transcript|CQ054260-RA|protein_coding||c.-3940T>G|||||3209|,G|intergenic_region|MODIFIER|CQ054259-CQ054260|CQ054259-CQ054260|intergenic_region|CQ054259-CQ054260|||n.35725840T>G||||||
DTM	Cq2A	35730326	Cq2A_35730326	1.2e-07	C	G	intron_variant	c.122+167C>G		G|intron_variant|MODIFIER|CQ054260|CQ054260|transcript|CQ054260-RA|protein_coding|3/13|c.122+167C>G||||||
DTM	Cq2A	35738860	Cq2A_35738860	9.76e-08	T	C	downstream_gene_variant,intron_variant	c.*2525A>G,c.870+119T>C		C|downstream_gene_variant|MODIFIER|CQ054261|CQ054261|transcript|CQ054261-RA|protein_coding||c.*2525A>G|||||1826|,C|intron_variant|MODIFIER|CQ054260|CQ054260|transcript|CQ054260-RA|protein_coding|11/13|c.870+119T>C||||||
DTM	Cq2A	35751065	Cq2A_35751065	1.84e-07	A	T	intergenic_region	n.35751065A>T		T|intergenic_region|MODIFIER|CQ054261-CQ054262|CQ054261-CQ054262|intergenic_region|CQ054261-CQ054262|||n.35751065A>T||||||
DTM	Cq2A	35760067	Cq2A_35760067	1.56e-07	G	C	intergenic_region	n.35760067G>C		C|intergenic_region|MODIFIER|CQ054261-CQ054262|CQ054261-CQ054262|intergenic_region|CQ054261-CQ054262|||n.35760067G>C||||||
DTM	Cq3A	38878561	Cq3A_38878561	3.06e-07	C	T	intergenic_region	n.38878561C>T		T|intergenic_region|MODIFIER|CQ045808-CQ045809|CQ045808-CQ045809|intergenic_region|CQ045808-CQ045809|||n.38878561C>T||||||
DTM	Cq4A	7884904	Cq4A_7884904	3.65e-09	A	G	missense_variant,downstream_gene_variant	c.31A>G,c.*3409A>G	p.Met11Val,.	G|missense_variant|MODERATE|CQ035778|CQ035778|transcript|CQ035778-RA|protein_coding|1/5|c.31A>G|p.Met11Val|234/2229|31/1350|11/449||,G|downstream_gene_variant|MODIFIER|CQ035777|CQ035777|transcript|CQ035777-RA|protein_coding||c.*3409A>G|||||3047|
DTM	Cq4A	9204407	Cq4A_9204407	1.14e-10	T	C	intergenic_region	n.9204407T>C		C|intergenic_region|MODIFIER|CQ035900-CQ035901|CQ035900-CQ035901|intergenic_region|CQ035900-CQ035901|||n.9204407T>C||||||
DTM	Cq4A	21379455	Cq4A_21379455	7.54e-09	G	T	intergenic_region	n.21379455G>T		T|intergenic_region|MODIFIER|CQ036431-CQ036432|CQ036431-CQ036432|intergenic_region|CQ036431-CQ036432|||n.21379455G>T||||||
DTM	Cq4A	53584255	Cq4A_53584255	4.72e-08	A	G	3_prime_UTR_variant	c.*39A>G		G|3_prime_UTR_variant|MODIFIER|CQ037458|CQ037458|transcript|CQ037458-RA|protein_coding|3/4|c.*39A>G|||||39|
DTM	Cq6A	4624838	Cq6A_4624838	1.15e-07	A	T	upstream_gene_variant,intergenic_region	c.-2959T>A,n.4624838A>T		T|upstream_gene_variant|MODIFIER|CQ025786|CQ025786|transcript|CQ025786-RA|protein_coding||c.-2959T>A|||||2787|,T|intergenic_region|MODIFIER|CQ025786-CQ025787|CQ025786-CQ025787|intergenic_region|CQ025786-CQ025787|||n.4624838A>T||||||
DTM	Cq6A	13268215	Cq6A_13268215	6.73e-08	G	A	intergenic_region	n.13268215G>A		A|intergenic_region|MODIFIER|CQ026306-CQ026307|CQ026306-CQ026307|intergenic_region|CQ026306-CQ026307|||n.13268215G>A||||||
DTM	Cq6A	13399092	Cq6A_13399092	6.54e-07	C	T	missense_variant,upstream_gene_variant	c.806G>A,c.-3670C>T	p.Arg269Lys,.	T|missense_variant|MODERATE|CQ026309|CQ026309|transcript|CQ026309-RA|protein_coding|6/7|c.806G>A|p.Arg269Lys|806/1155|806/882|269/293||WARNING_TRANSCRIPT_NO_START_CODON,T|upstream_gene_variant|MODIFIER|CQ026310|CQ026310|transcript|CQ026310-RA|protein_coding||c.-3670C>T|||||3670|WARNING_TRANSCRIPT_MULTIPLE_STOP_CODONS
DTM	Cq6A	13663488	Cq6A_13663488	2.31e-07	C	G	intergenic_region	n.13663488C>G		G|intergenic_region|MODIFIER|CQ026311-CQ026312|CQ026311-CQ026312|intergenic_region|CQ026311-CQ026312|||n.13663488C>G||||||
DTM	Cq6A	13911706	Cq6A_13911706	2.42e-08	A	T	intergenic_region	n.13911706A>T		T|intergenic_region|MODIFIER|CQ026315-CQ026316|CQ026315-CQ026316|intergenic_region|CQ026315-CQ026316|||n.13911706A>T||||||
DTM	Cq6A	13925586	Cq6A_13925586	4.62e-07	G	C	intergenic_region	n.13925586G>C		C|intergenic_region|MODIFIER|CQ026315-CQ026316|CQ026315-CQ026316|intergenic_region|CQ026315-CQ026316|||n.13925586G>C||||||
DTM	Cq6A	13928561	Cq6A_13928561	4.98e-07	G	A	intergenic_region	n.13928561G>A		A|intergenic_region|MODIFIER|CQ026315-CQ026316|CQ026315-CQ026316|intergenic_region|CQ026315-CQ026316|||n.13928561G>A||||||
DTM	Cq6A	13971037	Cq6A_13971037	4.35e-08	A	C	intron_variant	c.361-2307A>C		C|intron_variant|MODIFIER|CQ026316|CQ026316|transcript|CQ026316-RA|protein_coding|3/4|c.361-2307A>C||||||
DTM	Cq6A	13993522	Cq6A_13993522	3.57e-07	G	A	intron_variant	c.987-39G>A		A|intron_variant|MODIFIER|CQ026317|CQ026317|transcript|CQ026317-RA|protein_coding|6/9|c.987-39G>A||||||
DTM	Cq6A	14002252	Cq6A_14002252	3.67e-09	T	A	intergenic_region	n.14002252T>A		A|intergenic_region|MODIFIER|CQ026317-CQ026318|CQ026317-CQ026318|intergenic_region|CQ026317-CQ026318|||n.14002252T>A||||||
DTM	Cq6A	14002285	Cq6A_14002285	6.42e-07	C	A	intergenic_region	n.14002285C>A		A|intergenic_region|MODIFIER|CQ026317-CQ026318|CQ026317-CQ026318|intergenic_region|CQ026317-CQ026318|||n.14002285C>A||||||
DTM	Cq6A	14092563	Cq6A_14092563	5.29e-07	C	T	intergenic_region	n.14092563C>T		T|intergenic_region|MODIFIER|CQ026320-CQ026321|CQ026320-CQ026321|intergenic_region|CQ026320-CQ026321|||n.14092563C>T||||||
DTM	Cq6A	14143276	Cq6A_14143276	1.12e-07	A	G	missense_variant	c.329A>G	p.His110Arg	G|missense_variant|MODERATE|CQ026321|CQ026321|transcript|CQ026321-RA|protein_coding|3/10|c.329A>G|p.His110Arg|329/969|329/969|110/322||
DTM	Cq6A	14164315	Cq6A_14164315	5.73e-07	C	T	intergenic_region	n.14164315C>T		T|intergenic_region|MODIFIER|CQ026321-CQ026322|CQ026321-CQ026322|intergenic_region|CQ026321-CQ026322|||n.14164315C>T||||||
DTM	Cq6A	14239695	Cq6A_14239695	5.28e-08	T	C	intergenic_region	n.14239695T>C		C|intergenic_region|MODIFIER|CQ026325-CQ026326|CQ026325-CQ026326|intergenic_region|CQ026325-CQ026326|||n.14239695T>C||||||
DTM	Cq6A	14239727	Cq6A_14239727	1.49e-08	A	T	intergenic_region	n.14239727A>T		T|intergenic_region|MODIFIER|CQ026325-CQ026326|CQ026325-CQ026326|intergenic_region|CQ026325-CQ026326|||n.14239727A>T||||||
DTM	Cq6A	14277542	Cq6A_14277542	5.97e-07	T	A	downstream_gene_variant,downstream_gene_variant,intergenic_region	c.*1050A>T,c.*2247A>T,n.14277542T>A		A|downstream_gene_variant|MODIFIER|CQ026326|CQ026326|transcript|CQ026326-RA|protein_coding||c.*1050A>T|||||1050|WARNING_TRANSCRIPT_NO_STOP_CODON,A|downstream_gene_variant|MODIFIER|CQ026327|CQ026327|transcript|CQ026327-RA|protein_coding||c.*2247A>T|||||2247|,A|intergenic_region|MODIFIER|CQ026325-CQ026326|CQ026325-CQ026326|intergenic_region|CQ026325-CQ026326|||n.14277542T>A||||||
DTM	Cq6A	14278159	Cq6A_14278159	6.82e-07	T	C	downstream_gene_variant,downstream_gene_variant,intergenic_region	c.*433A>G,c.*1630A>G,n.14278159T>C		C|downstream_gene_variant|MODIFIER|CQ026326|CQ026326|transcript|CQ026326-RA|protein_coding||c.*433A>G|||||433|WARNING_TRANSCRIPT_NO_STOP_CODON,C|downstream_gene_variant|MODIFIER|CQ026327|CQ026327|transcript|CQ026327-RA|protein_coding||c.*1630A>G|||||1630|,C|intergenic_region|MODIFIER|CQ026325-CQ026326|CQ026325-CQ026326|intergenic_region|CQ026325-CQ026326|||n.14278159T>C||||||
DTM	Cq6A	14350146	Cq6A_14350146	1.78e-08	G	T	intergenic_region	n.14350146G>T		T|intergenic_region|MODIFIER|CQ026328-CQ026329|CQ026328-CQ026329|intergenic_region|CQ026328-CQ026329|||n.14350146G>T||||||
DTM	Cq6A	14357251	Cq6A_14357251	3.84e-08	G	A	intergenic_region	n.14357251G>A		A|intergenic_region|MODIFIER|CQ026328-CQ026329|CQ026328-CQ026329|intergenic_region|CQ026328-CQ026329|||n.14357251G>A||||||
DTM	Cq6A	14361393	Cq6A_14361393	1.56e-07	G	T	intergenic_region	n.14361393G>T		T|intergenic_region|MODIFIER|CQ026328-CQ026329|CQ026328-CQ026329|intergenic_region|CQ026328-CQ026329|||n.14361393G>T||||||
DTM	Cq6A	14423106	Cq6A_14423106	6.96e-07	A	T	downstream_gene_variant,intergenic_region	c.*613T>A,n.14423106A>T		T|downstream_gene_variant|MODIFIER|CQ026330|CQ026330|transcript|CQ026330-RA|protein_coding||c.*613T>A|||||613|,T|intergenic_region|MODIFIER|CQ026329-CQ026330|CQ026329-CQ026330|intergenic_region|CQ026329-CQ026330|||n.14423106A>T||||||
DTM	Cq7A	49659684	Cq7A_49659684	4.16e-11	T	G	intergenic_region	n.49659684T>G		G|intergenic_region|MODIFIER|CQ043267-CQ043268|CQ043267-CQ043268|intergenic_region|CQ043267-CQ043268|||n.49659684T>G||||||
DTM	Cq7A	49674949	Cq7A_49674949	6.52e-09	G	A	intergenic_region	n.49674949G>A		A|intergenic_region|MODIFIER|CQ043268-CQ043269|CQ043268-CQ043269|intergenic_region|CQ043268-CQ043269|||n.49674949G>A||||||
DTM	Cq7A	49675495	Cq7A_49675495	1.85e-09	T	G	intergenic_region	n.49675495T>G		G|intergenic_region|MODIFIER|CQ043268-CQ043269|CQ043268-CQ043269|intergenic_region|CQ043268-CQ043269|||n.49675495T>G||||||
DTM	Cq7A	49679584	Cq7A_49679584	2.26e-10	A	G	intergenic_region	n.49679584A>G		G|intergenic_region|MODIFIER|CQ043268-CQ043269|CQ043268-CQ043269|intergenic_region|CQ043268-CQ043269|||n.49679584A>G||||||
DTM	Cq8A	35314850	Cq8A_35314850	6.58e-07	A	C	intergenic_region	n.35314850A>C		C|intergenic_region|MODIFIER|CQ039436-CQ039437|CQ039436-CQ039437|intergenic_region|CQ039436-CQ039437|||n.35314850A>C||||||
DTM	Cq8A	35488532	Cq8A_35488532	8.85e-09	C	T	intergenic_region	n.35488532C>T		T|intergenic_region|MODIFIER|CQ039439-CQ039440|CQ039439-CQ039440|intergenic_region|CQ039439-CQ039440|||n.35488532C>T||||||
DTM	Cq8A	36176151	Cq8A_36176151	6.33e-08	C	T	intergenic_region	n.36176151C>T		T|intergenic_region|MODIFIER|CQ039463-CQ039464|CQ039463-CQ039464|intergenic_region|CQ039463-CQ039464|||n.36176151C>T||||||
DTM	Cq9A	4553533	Cq9A_4553533	1.24e-07	C	T	intergenic_region	n.4553533C>T		T|intergenic_region|MODIFIER|CQ050101-CQ050102|CQ050101-CQ050102|intergenic_region|CQ050101-CQ050102|||n.4553533C>T||||||
DTM	Cq9A	5085680	Cq9A_5085680	7.55e-08	C	A	downstream_gene_variant,intergenic_region	c.*4653C>A,n.5085680C>A		A|downstream_gene_variant|MODIFIER|CQ050144|CQ050144|transcript|CQ050144-RA|protein_coding||c.*4653C>A|||||4108|,A|intergenic_region|MODIFIER|CQ050144-CQ050145|CQ050144-CQ050145|intergenic_region|CQ050144-CQ050145|||n.5085680C>A||||||
DTM	Cq9A	5648182	Cq9A_5648182	7.49e-09	C	T	downstream_gene_variant,downstream_gene_variant,intergenic_region	c.*634C>T,c.*1643G>A,n.5648182C>T		T|downstream_gene_variant|MODIFIER|CQ050182|CQ050182|transcript|CQ050182-RA|protein_coding||c.*634C>T|||||37|,T|downstream_gene_variant|MODIFIER|CQ050183|CQ050183|transcript|CQ050183-RA|protein_coding||c.*1643G>A|||||1048|,T|intergenic_region|MODIFIER|CQ050182-CQ050183|CQ050182-CQ050183|intergenic_region|CQ050182-CQ050183|||n.5648182C>T||||||
DTM	Cq9A	5650612	Cq9A_5650612	3.42e-08	C	T	missense_variant,downstream_gene_variant	c.194G>A,c.*3064C>T	p.Ser65Asn,.	T|missense_variant|MODERATE|CQ050183|CQ050183|transcript|CQ050183-RA|protein_coding|2/2|c.194G>A|p.Ser65Asn|371/1753|194/981|65/326||,T|downstream_gene_variant|MODIFIER|CQ050182|CQ050182|transcript|CQ050182-RA|protein_coding||c.*3064C>T|||||2467|
DTM	Cq9A	5885043	Cq9A_5885043	3.08e-08	G	A	upstream_gene_variant,intergenic_region	c.-5540C>T,n.5885043G>A		A|upstream_gene_variant|MODIFIER|CQ050202|CQ050202|transcript|CQ050202-RA|protein_coding||c.-5540C>T|||||3280|,A|intergenic_region|MODIFIER|CQ050202-CQ050203|CQ050202-CQ050203|intergenic_region|CQ050202-CQ050203|||n.5885043G>A||||||
DTM	Cq9A	12884587	Cq9A_12884587	4.18e-07	A	G	intergenic_region	n.12884587A>G		G|intergenic_region|MODIFIER|CQ050519-CQ050520|CQ050519-CQ050520|intergenic_region|CQ050519-CQ050520|||n.12884587A>G||||||
DTM	Cq2B	883786	Cq2B_883786	5.7e-08	T	A	intergenic_region	n.883786T>A		A|intergenic_region|MODIFIER|CQ013132-CQ013133|CQ013132-CQ013133|intergenic_region|CQ013132-CQ013133|||n.883786T>A||||||
DTM	Cq2B	8184043	Cq2B_8184043	6.26e-08	G	T	intron_variant	c.246+497G>T		T|intron_variant|MODIFIER|CQ013742|CQ013742|transcript|CQ013742-RA|protein_coding|1/3|c.246+497G>T||||||
DTM	Cq2B	8186983	Cq2B_8186983	3.92e-08	A	T	downstream_gene_variant,intron_variant	c.*3216T>A,c.537+103A>T		T|downstream_gene_variant|MODIFIER|CQ013743|CQ013743|transcript|CQ013743-RA|protein_coding||c.*3216T>A|||||3062|,T|intron_variant|MODIFIER|CQ013742|CQ013742|transcript|CQ013742-RA|protein_coding|3/3|c.537+103A>T||||||
DTM	Cq2B	8190566	Cq2B_8190566	3.09e-07	C	G	synonymous_variant,downstream_gene_variant	c.840G>C,c.*2895C>G	p.Val280Val,.	G|synonymous_variant|LOW|CQ013743|CQ013743|transcript|CQ013743-RA|protein_coding|4/5|c.840G>C|p.Val280Val|1131/1561|840/1116|280/371||,G|downstream_gene_variant|MODIFIER|CQ013742|CQ013742|transcript|CQ013742-RA|protein_coding||c.*2895C>G|||||1918|
DTM	Cq2B	16419917	Cq2B_16419917	2.86e-07	T	G	intergenic_region	n.16419917T>G		G|intergenic_region|MODIFIER|CQ014054-CQ014055|CQ014054-CQ014055|intergenic_region|CQ014054-CQ014055|||n.16419917T>G||||||
DTM	Cq2B	18973149	Cq2B_18973149	6.16e-08	G	A	intergenic_region	n.18973149G>A		A|intergenic_region|MODIFIER|CQ014114-CQ014115|CQ014114-CQ014115|intergenic_region|CQ014114-CQ014115|||n.18973149G>A||||||
DTM	Cq2B	19157305	Cq2B_19157305	2.18e-07	A	T	intergenic_region	n.19157305A>T		T|intergenic_region|MODIFIER|CQ014121-CQ014122|CQ014121-CQ014122|intergenic_region|CQ014121-CQ014122|||n.19157305A>T||||||
DTM	Cq2B	19217366	Cq2B_19217366	4.07e-07	C	T	intergenic_region	n.19217366C>T		T|intergenic_region|MODIFIER|CQ014124-CQ014125|CQ014124-CQ014125|intergenic_region|CQ014124-CQ014125|||n.19217366C>T||||||
DTM	Cq2B	19242162	Cq2B_19242162	2.99e-11	G	T	intergenic_region	n.19242162G>T		T|intergenic_region|MODIFIER|CQ014124-CQ014125|CQ014124-CQ014125|intergenic_region|CQ014124-CQ014125|||n.19242162G>T||||||
DTM	Cq2B	20414213	Cq2B_20414213	7.28e-07	C	G	intergenic_region	n.20414213C>G		G|intergenic_region|MODIFIER|CQ014158-CQ014159|CQ014158-CQ014159|intergenic_region|CQ014158-CQ014159|||n.20414213C>G||||||
DTM	Cq2B	23676593	Cq2B_23676593	3.66e-07	T	A	intergenic_region	n.23676593T>A		A|intergenic_region|MODIFIER|CQ014215-CQ014216|CQ014215-CQ014216|intergenic_region|CQ014215-CQ014216|||n.23676593T>A||||||
DTM	Cq2B	23743753	Cq2B_23743753	3.42e-07	T	G	downstream_gene_variant,intergenic_region	c.*2294A>C,n.23743753T>G		G|downstream_gene_variant|MODIFIER|CQ014218|CQ014218|transcript|CQ014218-RA|protein_coding||c.*2294A>C|||||2294|WARNING_TRANSCRIPT_NO_STOP_CODON,G|intergenic_region|MODIFIER|CQ014217-CQ014218|CQ014217-CQ014218|intergenic_region|CQ014217-CQ014218|||n.23743753T>G||||||
DTM	Cq2B	23743755	Cq2B_23743755	2.16e-07	G	C	downstream_gene_variant,intergenic_region	c.*2292C>G,n.23743755G>C		C|downstream_gene_variant|MODIFIER|CQ014218|CQ014218|transcript|CQ014218-RA|protein_coding||c.*2292C>G|||||2292|WARNING_TRANSCRIPT_NO_STOP_CODON,C|intergenic_region|MODIFIER|CQ014217-CQ014218|CQ014217-CQ014218|intergenic_region|CQ014217-CQ014218|||n.23743755G>C||||||
DTM	Cq2B	23814938	Cq2B_23814938	2.35e-07	G	T	intergenic_region	n.23814938G>T		T|intergenic_region|MODIFIER|CQ014220-CQ014221|CQ014220-CQ014221|intergenic_region|CQ014220-CQ014221|||n.23814938G>T||||||
DTM	Cq2B	23885933	Cq2B_23885933	1.47e-07	G	A	intergenic_region	n.23885933G>A		A|intergenic_region|MODIFIER|CQ014222-CQ014224|CQ014222-CQ014224|intergenic_region|CQ014222-CQ014224|||n.23885933G>A||||||
DTM	Cq2B	23922218	Cq2B_23922218	4.4e-10	A	G	intron_variant	c.975+1084T>C		G|intron_variant|MODIFIER|CQ014224|CQ014224|transcript|CQ014224-RA|protein_coding|12/21|c.975+1084T>C||||||
DTM	Cq2B	24614287	Cq2B_24614287	3.79e-07	A	G	upstream_gene_variant,downstream_gene_variant,intergenic_region	c.-1047A>G,c.*611A>G,n.24614287A>G		G|upstream_gene_variant|MODIFIER|CQ014232|CQ014232|transcript|CQ014232-RA|protein_coding||c.-1047A>G|||||1047|,G|downstream_gene_variant|MODIFIER|CQ014231|CQ014231|transcript|CQ014231-RA|protein_coding||c.*611A>G|||||611|,G|intergenic_region|MODIFIER|CQ014231-CQ014232|CQ014231-CQ014232|intergenic_region|CQ014231-CQ014232|||n.24614287A>G||||||
DTM	Cq2B	45571673	Cq2B_45571673	3.33e-11	T	G	intergenic_region	n.45571673T>G		G|intergenic_region|MODIFIER|CQ014449-CQ014450|CQ014449-CQ014450|intergenic_region|CQ014449-CQ014450|||n.45571673T>G||||||
DTM	Cq2B	52865160	Cq2B_52865160	5.84e-08	T	G	intergenic_region	n.52865160T>G		G|intergenic_region|MODIFIER|CQ014648-CQ014649|CQ014648-CQ014649|intergenic_region|CQ014648-CQ014649|||n.52865160T>G||||||
DTM	Cq2B	53026527	Cq2B_53026527	2.73e-07	T	C	intergenic_region	n.53026527T>C		C|intergenic_region|MODIFIER|CQ014654-CQ014655|CQ014654-CQ014655|intergenic_region|CQ014654-CQ014655|||n.53026527T>C||||||
DTM	Cq2B	53552874	Cq2B_53552874	6.92e-07	A	G	upstream_gene_variant,downstream_gene_variant,intergenic_region	c.-4838A>G,c.*1336A>G,n.53552874A>G		G|upstream_gene_variant|MODIFIER|CQ014672|CQ014672|transcript|CQ014672-RA|protein_coding||c.-4838A>G|||||3285|,G|downstream_gene_variant|MODIFIER|CQ014671|CQ014671|transcript|CQ014671-RA|protein_coding||c.*1336A>G|||||1336|WARNING_TRANSCRIPT_NO_START_CODON,G|intergenic_region|MODIFIER|CQ014671-CQ014672|CQ014671-CQ014672|intergenic_region|CQ014671-CQ014672|||n.53552874A>G||||||
DTM	Cq2B	55082219	Cq2B_55082219	6.57e-07	G	A	intergenic_region	n.55082219G>A		A|intergenic_region|MODIFIER|CQ014715-CQ014716|CQ014715-CQ014716|intergenic_region|CQ014715-CQ014716|||n.55082219G>A||||||
DTM	Cq4B	3070104	Cq4B_3070104	1.34e-09	G	A	upstream_gene_variant,downstream_gene_variant,intergenic_region	c.-1398G>A,c.*2643C>T,n.3070104G>A		A|upstream_gene_variant|MODIFIER|CQ019941|CQ019941|transcript|CQ019941-RA|protein_coding||c.-1398G>A|||||1398|,A|downstream_gene_variant|MODIFIER|CQ019940|CQ019940|transcript|CQ019940-RA|protein_coding||c.*2643C>T|||||1242|,A|intergenic_region|MODIFIER|CQ019939-CQ019940|CQ019939-CQ019940|intergenic_region|CQ019939-CQ019940|||n.3070104G>A||||||
DTM	Cq4B	41615836	Cq4B_41615836	2.32e-07	T	C	intergenic_region	n.41615836T>C		C|intergenic_region|MODIFIER|CQ021449-CQ021450|CQ021449-CQ021450|intergenic_region|CQ021449-CQ021450|||n.41615836T>C||||||
DTM	Cq4B	65304009	Cq4B_65304009	4.56e-08	C	T	intron_variant	c.-139+720G>A		T|intron_variant|MODIFIER|CQ022193|CQ022193|transcript|CQ022193-RA|protein_coding|1/3|c.-139+720G>A||||||
DTM	Cq4B	66514266	Cq4B_66514266	3.76e-07	A	G	downstream_gene_variant,downstream_gene_variant,intergenic_region	c.*4694A>G,c.*2782A>G,n.66514266A>G		G|downstream_gene_variant|MODIFIER|CQ022281|CQ022281|transcript|CQ022281-RA|protein_coding||c.*4694A>G|||||3888|,G|downstream_gene_variant|MODIFIER|CQ022282|CQ022282|transcript|CQ022282-RA|protein_coding||c.*2782A>G|||||2782|WARNING_TRANSCRIPT_INCOMPLETE,G|intergenic_region|MODIFIER|CQ022282-CQ022283|CQ022282-CQ022283|intergenic_region|CQ022282-CQ022283|||n.66514266A>G||||||
DTM	Cq4B	66684739	Cq4B_66684739	8.47e-09	C	T	5_prime_UTR_variant,upstream_gene_variant,upstream_gene_variant	c.-387G>A,c.-1342C>T,c.-2660C>T		T|5_prime_UTR_variant|MODIFIER|CQ022294|CQ022294|transcript|CQ022294-RA|protein_coding|1/16|c.-387G>A|||||387|,T|upstream_gene_variant|MODIFIER|CQ022296|CQ022296|transcript|CQ022296-RA|protein_coding||c.-1342C>T|||||1342|,T|upstream_gene_variant|MODIFIER|CQ022297|CQ022297|transcript|CQ022297-RA|protein_coding||c.-2660C>T|||||2660|WARNING_TRANSCRIPT_NO_START_CODON
DTM	Cq4B	66703194	Cq4B_66703194	7.51e-09	T	G	intergenic_region	n.66703194T>G		G|intergenic_region|MODIFIER|CQ022299-CQ022300|CQ022299-CQ022300|intergenic_region|CQ022299-CQ022300|||n.66703194T>G||||||
DTM	Cq4B	67331570	Cq4B_67331570	1.9e-07	T	A	missense_variant,downstream_gene_variant	c.752T>A,c.*4403T>A	p.Val251Asp,.	A|missense_variant|MODERATE|CQ022355|CQ022355|transcript|CQ022355-RA|protein_coding|1/2|c.752T>A|p.Val251Asp|752/1008|752/1008|251/335||,A|downstream_gene_variant|MODIFIER|CQ022354|CQ022354|transcript|CQ022354-RA|protein_coding||c.*4403T>A|||||4403|
DTM	Cq4B	71173333	Cq4B_71173333	6.86e-09	A	G	upstream_gene_variant,downstream_gene_variant,intergenic_region	c.-883A>G,c.*1667A>G,n.71173333A>G		G|upstream_gene_variant|MODIFIER|CQ022762|CQ022762|transcript|CQ022762-RA|protein_coding||c.-883A>G|||||883|WARNING_TRANSCRIPT_NO_START_CODON,G|downstream_gene_variant|MODIFIER|CQ022761|CQ022761|transcript|CQ022761-RA|protein_coding||c.*1667A>G|||||1667|WARNING_TRANSCRIPT_NO_STOP_CODON,G|intergenic_region|MODIFIER|CQ022761-CQ022762|CQ022761-CQ022762|intergenic_region|CQ022761-CQ022762|||n.7117333…
DTM	Cq5B	3517365	Cq5B_3517365	6.63e-08	A	T	missense_variant	c.239A>T	p.Tyr80Phe	T|missense_variant|MODERATE|CQ003824|CQ003824|transcript|CQ003824-RA|protein_coding|2/4|c.239A>T|p.Tyr80Phe|336/481|239/384|80/127||
DTM	Cq7B	20730220	Cq7B_20730220	4.55e-08	G	C	intergenic_region	n.20730220G>C		C|intergenic_region|MODIFIER|CQ008810-CQ008811|CQ008810-CQ008811|intergenic_region|CQ008810-CQ008811|||n.20730220G>C||||||
DTM	Cq7B	21322742	Cq7B_21322742	4.31e-08	A	G	intergenic_region	n.21322742A>G		G|intergenic_region|MODIFIER|CQ008825-CQ008826|CQ008825-CQ008826|intergenic_region|CQ008825-CQ008826|||n.21322742A>G||||||
DTM	Cq7B	21622208	Cq7B_21622208	2.25e-07	T	C	intergenic_region	n.21622208T>C		C|intergenic_region|MODIFIER|CQ008833-CQ008834|CQ008833-CQ008834|intergenic_region|CQ008833-CQ008834|||n.21622208T>C||||||
DTM	Cq7B	21646809	Cq7B_21646809	2.17e-07	G	A	intergenic_region	n.21646809G>A		A|intergenic_region|MODIFIER|CQ008833-CQ008834|CQ008833-CQ008834|intergenic_region|CQ008833-CQ008834|||n.21646809G>A||||||
DTM	Cq7B	22066983	Cq7B_22066983	7.01e-07	C	T	intergenic_region	n.22066983C>T		T|intergenic_region|MODIFIER|CQ008853-CQ008854|CQ008853-CQ008854|intergenic_region|CQ008853-CQ008854|||n.22066983C>T||||||
DTM	Cq7B	23528273	Cq7B_23528273	3.93e-07	G	T	intergenic_region	n.23528273G>T		T|intergenic_region|MODIFIER|CQ008891-CQ008892|CQ008891-CQ008892|intergenic_region|CQ008891-CQ008892|||n.23528273G>T||||||
DTM	Cq7B	23771526	Cq7B_23771526	5.31e-08	A	T	intergenic_region	n.23771526A>T		T|intergenic_region|MODIFIER|CQ008896-CQ008897|CQ008896-CQ008897|intergenic_region|CQ008896-CQ008897|||n.23771526A>T||||||
DTM	Cq7B	24551921	Cq7B_24551921	5.8e-08	C	T	upstream_gene_variant,intergenic_region	c.-4244G>A,n.24551921C>T		T|upstream_gene_variant|MODIFIER|CQ008906|CQ008906|transcript|CQ008906-RA|protein_coding||c.-4244G>A|||||4047|,T|intergenic_region|MODIFIER|CQ008906-CQ008907|CQ008906-CQ008907|intergenic_region|CQ008906-CQ008907|||n.24551921C>T||||||
DTM	Cq7B	24553956	Cq7B_24553956	2.79e-08	G	T	intergenic_region	n.24553956G>T		T|intergenic_region|MODIFIER|CQ008906-CQ008907|CQ008906-CQ008907|intergenic_region|CQ008906-CQ008907|||n.24553956G>T||||||
DTM	Cq7B	24557223	Cq7B_24557223	9.54e-09	T	C	intergenic_region	n.24557223T>C		C|intergenic_region|MODIFIER|CQ008906-CQ008907|CQ008906-CQ008907|intergenic_region|CQ008906-CQ008907|||n.24557223T>C||||||
DTM	Cq7B	24561219	Cq7B_24561219	1.54e-08	G	A	upstream_gene_variant,intergenic_region	c.-3982G>A,n.24561219G>A		A|upstream_gene_variant|MODIFIER|CQ008907|CQ008907|transcript|CQ008907-RA|protein_coding||c.-3982G>A|||||3982|,A|intergenic_region|MODIFIER|CQ008906-CQ008907|CQ008906-CQ008907|intergenic_region|CQ008906-CQ008907|||n.24561219G>A||||||
DTM	Cq7B	24565101	Cq7B_24565101	3.69e-07	A	T	upstream_gene_variant,intergenic_region	c.-100A>T,n.24565101A>T		T|upstream_gene_variant|MODIFIER|CQ008907|CQ008907|transcript|CQ008907-RA|protein_coding||c.-100A>T|||||100|,T|intergenic_region|MODIFIER|CQ008906-CQ008907|CQ008906-CQ008907|intergenic_region|CQ008906-CQ008907|||n.24565101A>T||||||
DTM	Cq7B	24569568	Cq7B_24569568	7.55e-08	A	C	downstream_gene_variant,intergenic_region	c.*1734A>C,n.24569568A>C		C|downstream_gene_variant|MODIFIER|CQ008907|CQ008907|transcript|CQ008907-RA|protein_coding||c.*1734A>C|||||1734|,C|intergenic_region|MODIFIER|CQ008907-CQ008908|CQ008907-CQ008908|intergenic_region|CQ008907-CQ008908|||n.24569568A>C||||||
DTM	Cq7B	24589263	Cq7B_24589263	2.9e-08	G	A	intergenic_region	n.24589263G>A		A|intergenic_region|MODIFIER|CQ008907-CQ008908|CQ008907-CQ008908|intergenic_region|CQ008907-CQ008908|||n.24589263G>A||||||
DTM	Cq7B	24621794	Cq7B_24621794	1.14e-08	A	G	missense_variant	c.457A>G	p.Thr153Ala	G|missense_variant|MODERATE|CQ008912|CQ008912|transcript|CQ008912-RA|protein_coding|7/11|c.457A>G|p.Thr153Ala|457/774|457/774|153/257||
DTM	Cq8B	58401532	Cq8B_58401532	3.86e-07	C	T	3_prime_UTR_variant	c.*262G>A		T|3_prime_UTR_variant|MODIFIER|CQ011881|CQ011881|transcript|CQ011881-RA|protein_coding|10/10|c.*262G>A|||||262|
DTM	Cq8B	58950339	Cq8B_58950339	4.14e-07	T	C	intron_variant	c.1638+1570A>G		C|intron_variant|MODIFIER|CQ011895|CQ011895|transcript|CQ011895-RA|protein_coding|5/11|c.1638+1570A>G||||||
DTM	Cq8B	59025351	Cq8B_59025351	2.55e-07	A	G	downstream_gene_variant,intergenic_region	c.*863A>G,n.59025351A>G		G|downstream_gene_variant|MODIFIER|CQ011898|CQ011898|transcript|CQ011898-RA|protein_coding||c.*863A>G|||||863|,G|intergenic_region|MODIFIER|CQ011898-CQ011899|CQ011898-CQ011899|intergenic_region|CQ011898-CQ011899|||n.59025351A>G||||||
DTM	Cq8B	59147571	Cq8B_59147571	8.69e-07	C	A	intergenic_region	n.59147571C>A		A|intergenic_region|MODIFIER|CQ011900-CQ011901|CQ011900-CQ011901|intergenic_region|CQ011900-CQ011901|||n.59147571C>A||||||
DTM	Cq8B	59240530	Cq8B_59240530	6.88e-08	T	G	downstream_gene_variant,intergenic_region	c.*63A>C,n.59240530T>G		G|downstream_gene_variant|MODIFIER|CQ011901|CQ011901|transcript|CQ011901-RA|protein_coding||c.*63A>C|||||63|,G|intergenic_region|MODIFIER|CQ011900-CQ011901|CQ011900-CQ011901|intergenic_region|CQ011900-CQ011901|||n.59240530T>G||||||
DTM	Cq8B	59400725	Cq8B_59400725	4.4e-07	C	G	upstream_gene_variant,upstream_gene_variant,intergenic_region	c.-3923C>G,c.-3923C>G,n.59400725C>G		G|upstream_gene_variant|MODIFIER|CQ011904|CQ011904|transcript|CQ011904-RA|protein_coding||c.-3923C>G|||||3742|,G|upstream_gene_variant|MODIFIER|CQ011904|CQ011904|transcript|CQ011904-RB|protein_coding||c.-3923C>G|||||3840|,G|intergenic_region|MODIFIER|CQ011903-CQ011904|CQ011903-CQ011904|intergenic_region|CQ011903-CQ011904|||n.59400725C>G||||||
DTM	Cq8B	59403145	Cq8B_59403145	3.51e-07	A	T	upstream_gene_variant,upstream_gene_variant,intergenic_region	c.-1503A>T,c.-1503A>T,n.59403145A>T		T|upstream_gene_variant|MODIFIER|CQ011904|CQ011904|transcript|CQ011904-RA|protein_coding||c.-1503A>T|||||1322|,T|upstream_gene_variant|MODIFIER|CQ011904|CQ011904|transcript|CQ011904-RB|protein_coding||c.-1503A>T|||||1420|,T|intergenic_region|MODIFIER|CQ011903-CQ011904|CQ011903-CQ011904|intergenic_region|CQ011903-CQ011904|||n.59403145A>T||||||
DTM	Cq9B	15406776	Cq9B_15406776	9.87e-08	C	T	intergenic_region	n.15406776C>T		T|intergenic_region|MODIFIER|CQ033657-CQ033658|CQ033657-CQ033658|intergenic_region|CQ033657-CQ033658|||n.15406776C>T||||||
DTM	Cq9B	25287002	Cq9B_25287002	1.28e-07	A	G	intergenic_region	n.25287002A>G		G|intergenic_region|MODIFIER|CQ033921-CQ033922|CQ033921-CQ033922|intergenic_region|CQ033921-CQ033922|||n.25287002A>G||||||
DTM	Cq9B	25437104	Cq9B_25437104	4.41e-07	A	G	intergenic_region	n.25437104A>G		G|intergenic_region|MODIFIER|CQ033923-CQ033924|CQ033923-CQ033924|intergenic_region|CQ033923-CQ033924|||n.25437104A>G||||||
DTM	Cq9B	25631557	Cq9B_25631557	4.39e-08	A	G	synonymous_variant	c.675T>C	p.Val225Val	G|synonymous_variant|LOW|CQ033925|CQ033925|transcript|CQ033925-RA|protein_coding|1/3|c.675T>C|p.Val225Val|679/1657|675/1203|225/400||
DTM	Cq9B	28915189	Cq9B_28915189	2.25e-07	T	C	intergenic_region	n.28915189T>C		C|intergenic_region|MODIFIER|CQ033965-CQ033966|CQ033965-CQ033966|intergenic_region|CQ033965-CQ033966|||n.28915189T>C||||||
DTM	Cq9B	29313754	Cq9B_29313754	2.25e-07	A	T	intergenic_region	n.29313754A>T		T|intergenic_region|MODIFIER|CQ033970-CQ033971|CQ033970-CQ033971|intergenic_region|CQ033970-CQ033971|||n.29313754A>T||||||
DTM	Cq9B	30462006	Cq9B_30462006	8.37e-07	G	A	intergenic_region	n.30462006G>A		A|intergenic_region|MODIFIER|CQ033979-CQ033980|CQ033979-CQ033980|intergenic_region|CQ033979-CQ033980|||n.30462006G>A||||||
DTM	Cq9B	31549695	Cq9B_31549695	5.67e-07	G	A	intergenic_region	n.31549695G>A		A|intergenic_region|MODIFIER|CQ034000-CQ034001|CQ034000-CQ034001|intergenic_region|CQ034000-CQ034001|||n.31549695G>A||||||
DTM	Cq9B	31765783	Cq9B_31765783	3.94e-07	G	T	intergenic_region	n.31765783G>T		T|intergenic_region|MODIFIER|CQ034004-CQ034005|CQ034004-CQ034005|intergenic_region|CQ034004-CQ034005|||n.31765783G>T||||||
DTM	Cq9B	33922821	Cq9B_33922821	2.92e-08	A	G	intergenic_region	n.33922821A>G		G|intergenic_region|MODIFIER|CQ034023-CQ034024|CQ034023-CQ034024|intergenic_region|CQ034023-CQ034024|||n.33922821A>G||||||
DTM	Cq9B	34134069	Cq9B_34134069	7.86e-07	T	C	intergenic_region	n.34134069T>C		C|intergenic_region|MODIFIER|CQ034024-CQ034025|CQ034024-CQ034025|intergenic_region|CQ034024-CQ034025|||n.34134069T>C||||||
DTM	Cq9B	34558980	Cq9B_34558980	2.3e-08	G	A	intergenic_region	n.34558980G>A		A|intergenic_region|MODIFIER|CQ034030-CQ034034|CQ034030-CQ034034|intergenic_region|CQ034030-CQ034034|||n.34558980G>A||||||
DTM	Cq9B	38822576	Cq9B_38822576	1.86e-07	A	G	intergenic_region	n.38822576A>G		G|intergenic_region|MODIFIER|CQ034064-CQ034065|CQ034064-CQ034065|intergenic_region|CQ034064-CQ034065|||n.38822576A>G||||||
DTM	Cq9B	55201181	Cq9B_55201181	2.44e-07	G	A	intergenic_region	n.55201181G>A		A|intergenic_region|MODIFIER|CQ034384-CQ034385|CQ034384-CQ034385|intergenic_region|CQ034384-CQ034385|||n.55201181G>A||||||
DTM	Cq9B	55425561	Cq9B_55425561	4.85e-07	G	T	downstream_gene_variant,intergenic_region	c.*464G>T,n.55425561G>T		T|downstream_gene_variant|MODIFIER|CQ034395|CQ034395|transcript|CQ034395-RA|protein_coding||c.*464G>T|||||464|,T|intergenic_region|MODIFIER|CQ034395-CQ034396|CQ034395-CQ034396|intergenic_region|CQ034395-CQ034396|||n.55425561G>T||||||
FC	Cq1B	69729423	Cq1B_69729423	7.79e-09	T	C	downstream_gene_variant,downstream_gene_variant,intron_variant	c.*4431T>C,c.*3660A>G,c.406-31T>C		C|downstream_gene_variant|MODIFIER|CQ025265|CQ025265|transcript|CQ025265-RA|protein_coding||c.*4431T>C|||||4271|,C|downstream_gene_variant|MODIFIER|CQ025267|CQ025267|transcript|CQ025267-RA|protein_coding||c.*3660A>G|||||3348|,C|intron_variant|MODIFIER|CQ025266|CQ025266|transcript|CQ025266-RA|protein_coding|2/3|c.406-31T>C||||||
FC	Cq1B	69755797	Cq1B_69755797	5.66e-08	T	C	3_prime_UTR_variant,downstream_gene_variant	c.*527A>G,c.*3640T>C		C|3_prime_UTR_variant|MODIFIER|CQ025270|CQ025270|transcript|CQ025270-RA|protein_coding|3/3|c.*527A>G|||||527|,C|downstream_gene_variant|MODIFIER|CQ025269|CQ025269|transcript|CQ025269-RA|protein_coding||c.*3640T>C|||||3268|
FC	Cq8B	28985732	Cq8B_28985732	3.41e-07	A	G	intergenic_region	n.28985732A>G		G|intergenic_region|MODIFIER|CQ011441-CQ011442|CQ011441-CQ011442|intergenic_region|CQ011441-CQ011442|||n.28985732A>G||||||
FC	Cq8B	28985733	Cq8B_28985733	3.35e-07	C	A	intergenic_region	n.28985733C>A		A|intergenic_region|MODIFIER|CQ011441-CQ011442|CQ011441-CQ011442|intergenic_region|CQ011441-CQ011442|||n.28985733C>A||||||
PD	Cq2A	14819020	Cq2A_14819020	7.04e-07	T	C	intergenic_region	n.14819020T>C		C|intergenic_region|MODIFIER|CQ053712-CQ053713|CQ053712-CQ053713|intergenic_region|CQ053712-CQ053713|||n.14819020T>C||||||
PD	Cq9A	44032777	Cq9A_44032777	7.94e-07	T	C	upstream_gene_variant,intergenic_region	c.-5753A>G,n.44032777T>C		C|upstream_gene_variant|MODIFIER|CQ051566|CQ051566|transcript|CQ051566-RA|protein_coding||c.-5753A>G|||||4637|,C|intergenic_region|MODIFIER|CQ051566-CQ051567|CQ051566-CQ051567|intergenic_region|CQ051566-CQ051567|||n.44032777T>C||||||
PH	Cq2A	4242017	Cq2A_4242017	2.04e-08	C	T	synonymous_variant	c.1761G>A	p.Gln587Gln	T|synonymous_variant|LOW|CQ053133|CQ053133|transcript|CQ053133-RA|protein_coding|3/3|c.1761G>A|p.Gln587Gln|2790/3517|1761/1929|587/642||
PH	Cq2A	4406829	Cq2A_4406829	7.49e-08	G	C	upstream_gene_variant,intergenic_region	c.-5099C>G,n.4406829G>C		C|upstream_gene_variant|MODIFIER|CQ053143|CQ053143|transcript|CQ053143-RA|protein_coding||c.-5099C>G|||||4703|,C|intergenic_region|MODIFIER|CQ053143-CQ053144|CQ053143-CQ053144|intergenic_region|CQ053143-CQ053144|||n.4406829G>C||||||
PH	Cq2A	7164181	Cq2A_7164181	2.85e-07	T	C	intergenic_region	n.7164181T>C		C|intergenic_region|MODIFIER|CQ053354-CQ053355|CQ053354-CQ053355|intergenic_region|CQ053354-CQ053355|||n.7164181T>C||||||
PH	Cq2A	7525598	Cq2A_7525598	8.38e-08	G	A	intergenic_region	n.7525598G>A		A|intergenic_region|MODIFIER|CQ053390-CQ053391|CQ053390-CQ053391|intergenic_region|CQ053390-CQ053391|||n.7525598G>A||||||
PH	Cq2A	7738753	Cq2A_7738753	8.07e-07	T	A	3_prime_UTR_variant	c.*341T>A		A|3_prime_UTR_variant|MODIFIER|CQ053396|CQ053396|transcript|CQ053396-RA|protein_coding|4/4|c.*341T>A|||||341|
PH	Cq2A	8080505	Cq2A_8080505	3.62e-08	G	C	upstream_gene_variant,intergenic_region	c.-2890C>G,n.8080505G>C		C|upstream_gene_variant|MODIFIER|CQ053413|CQ053413|transcript|CQ053413-RA|protein_coding||c.-2890C>G|||||2699|,C|intergenic_region|MODIFIER|CQ053413-CQ053414|CQ053413-CQ053414|intergenic_region|CQ053413-CQ053414|||n.8080505G>C||||||
PH	Cq2A	8093547	Cq2A_8093547	1.62e-08	C	G	intron_variant	c.170+530G>C		G|intron_variant|MODIFIER|CQ053414|CQ053414|transcript|CQ053414-RA|protein_coding|2/6|c.170+530G>C||||||
PH	Cq2A	8116642	Cq2A_8116642	2.97e-07	T	C	intergenic_region	n.8116642T>C		C|intergenic_region|MODIFIER|CQ053414-CQ053415|CQ053414-CQ053415|intergenic_region|CQ053414-CQ053415|||n.8116642T>C||||||
PH	Cq2A	16014258	Cq2A_16014258	2.16e-08	A	C	intergenic_region	n.16014258A>C		C|intergenic_region|MODIFIER|CQ053762-CQ053764|CQ053762-CQ053764|intergenic_region|CQ053762-CQ053764|||n.16014258A>C||||||
PH	Cq7B	24561219	Cq7B_24561219	2.01e-07	G	A	upstream_gene_variant,intergenic_region	c.-3982G>A,n.24561219G>A		A|upstream_gene_variant|MODIFIER|CQ008907|CQ008907|transcript|CQ008907-RA|protein_coding||c.-3982G>A|||||3982|,A|intergenic_region|MODIFIER|CQ008906-CQ008907|CQ008906-CQ008907|intergenic_region|CQ008906-CQ008907|||n.24561219G>A||||||
PH	Cq7B	24589263	Cq7B_24589263	9.99e-08	G	A	intergenic_region	n.24589263G>A		A|intergenic_region|MODIFIER|CQ008907-CQ008908|CQ008907-CQ008908|intergenic_region|CQ008907-CQ008908|||n.24589263G>A||||||
PL	Cq2A	33232229	Cq2A_33232229	6.19e-07	C	T	intergenic_region	n.33232229C>T		T|intergenic_region|MODIFIER|CQ054159-CQ054160|CQ054159-CQ054160|intergenic_region|CQ054159-CQ054160|||n.33232229C>T||||||
PSH	Cq1B	53096686	Cq1B_53096686	5.32e-10	G	A	upstream_gene_variant,downstream_gene_variant,intergenic_region	c.-932G>A,c.*5373C>T,n.53096686G>A		A|upstream_gene_variant|MODIFIER|CQ024015|CQ024015|transcript|CQ024015-RA|protein_coding||c.-932G>A|||||858|,A|downstream_gene_variant|MODIFIER|CQ024016|CQ024016|transcript|CQ024016-RA|protein_coding||c.*5373C>T|||||4928|,A|intergenic_region|MODIFIER|CQ024014-CQ024015|CQ024014-CQ024015|intergenic_region|CQ024014-CQ024015|||n.53096686G>A||||||
PSH	Cq1B	53096708	Cq1B_53096708	1.4e-10	T	C	upstream_gene_variant,downstream_gene_variant,intergenic_region	c.-910T>C,c.*5351A>G,n.53096708T>C		C|upstream_gene_variant|MODIFIER|CQ024015|CQ024015|transcript|CQ024015-RA|protein_coding||c.-910T>C|||||836|,C|downstream_gene_variant|MODIFIER|CQ024016|CQ024016|transcript|CQ024016-RA|protein_coding||c.*5351A>G|||||4906|,C|intergenic_region|MODIFIER|CQ024014-CQ024015|CQ024014-CQ024015|intergenic_region|CQ024014-CQ024015|||n.53096708T>C||||||
Saponin	Cq5B	8847959	Cq5B_8847959	6.5e-07	A	G	upstream_gene_variant,downstream_gene_variant,intergenic_region	c.-2818T>C,c.*1881T>C,n.8847959A>G		G|upstream_gene_variant|MODIFIER|CQ004335|CQ004335|transcript|CQ004335-RA|protein_coding||c.-2818T>C|||||2794|,G|downstream_gene_variant|MODIFIER|CQ004336|CQ004336|transcript|CQ004336-RA|protein_coding||c.*1881T>C|||||1361|,G|intergenic_region|MODIFIER|CQ004335-CQ004336|CQ004335-CQ004336|intergenic_region|CQ004335-CQ004336|||n.8847959A>G||||||
Saponin	Cq5B	8854543	Cq5B_8854543	1.68e-07	C	A	intron_variant	c.-681+31G>T		A|intron_variant|MODIFIER|CQ004336|CQ004336|transcript|CQ004336-RA|protein_coding|15/22|c.-681+31G>T||||||
Saponin	Cq5B	8868163	Cq5B_8868163	5.33e-10	A	G	upstream_gene_variant,upstream_gene_variant,downstream_gene_variant,intergenic_region	c.-14784T>C,c.-2328T>C,c.*4666T>C,n.8868163A>G		G|upstream_gene_variant|MODIFIER|CQ004336|CQ004336|transcript|CQ004336-RA|protein_coding||c.-14784T>C|||||4423|,G|upstream_gene_variant|MODIFIER|CQ004337|CQ004337|transcript|CQ004337-RA|protein_coding||c.-2328T>C|||||180|,G|downstream_gene_variant|MODIFIER|CQ004338|CQ004338|transcript|CQ004338-RA|protein_coding||c.*4666T>C|||||4666|WARNING_TRANSCRIPT_NO_STOP_CODON,G|intergenic_region|MODIFIER|CQ0…
Saponin	Cq5B	8917092	Cq5B_8917092	4.87e-07	G	A	upstream_gene_variant,intergenic_region	c.-2153C>T,n.8917092G>A		A|upstream_gene_variant|MODIFIER|CQ004342|CQ004342|transcript|CQ004342-RA|protein_coding||c.-2153C>T|||||2062|,A|intergenic_region|MODIFIER|CQ004342-CQ004343|CQ004342-CQ004343|intergenic_region|CQ004342-CQ004343|||n.8917092G>A||||||
Saponin	Cq5B	9064122	Cq5B_9064122	5.87e-07	T	C	intron_variant	c.1398+139T>C		C|intron_variant|MODIFIER|CQ004353|CQ004353|transcript|CQ004353-RA|protein_coding|3/32|c.1398+139T>C||||||
Saponin	Cq5B	9203546	Cq5B_9203546	7.81e-07	C	T	intergenic_region	n.9203546C>T		T|intergenic_region|MODIFIER|CQ004365-CQ004366|CQ004365-CQ004366|intergenic_region|CQ004365-CQ004366|||n.9203546C>T||||||
SC	Cq1B	69755797	Cq1B_69755797	1.46e-08	T	C	3_prime_UTR_variant,downstream_gene_variant	c.*527A>G,c.*3640T>C		C|3_prime_UTR_variant|MODIFIER|CQ025270|CQ025270|transcript|CQ025270-RA|protein_coding|3/3|c.*527A>G|||||527|,C|downstream_gene_variant|MODIFIER|CQ025269|CQ025269|transcript|CQ025269-RA|protein_coding||c.*3640T>C|||||3268|
SC	Cq6B	39775228	Cq6B_39775228	6.33e-07	G	A	intergenic_region	n.39775228G>A		A|intergenic_region|MODIFIER|CQ001340-CQ001341|CQ001340-CQ001341|intergenic_region|CQ001340-CQ001341|||n.39775228G>A||||||
SC	Cq8B	28985707	Cq8B_28985707	4.06e-07	C	T	intergenic_region	n.28985707C>T		T|intergenic_region|MODIFIER|CQ011441-CQ011442|CQ011441-CQ011442|intergenic_region|CQ011441-CQ011442|||n.28985707C>T||||||
TSW	Cq1A	7136494	Cq1A_7136494	2.78e-07	G	A	intron_variant	c.397-98C>T		A|intron_variant|MODIFIER|CQ047642|CQ047642|transcript|CQ047642-RA|protein_coding|2/6|c.397-98C>T||||||
TSW	Cq2A	7594264	Cq2A_7594264	4.27e-07	A	G	upstream_gene_variant,intergenic_region	c.-3140T>C,n.7594264A>G		G|upstream_gene_variant|MODIFIER|CQ053392|CQ053392|transcript|CQ053392-RA|protein_coding||c.-3140T>C|||||2697|,G|intergenic_region|MODIFIER|CQ053392-CQ053393|CQ053392-CQ053393|intergenic_region|CQ053392-CQ053393|||n.7594264A>G||||||
TSW	Cq2A	37022028	Cq2A_37022028	7.98e-07	A	G	intergenic_region	n.37022028A>G		G|intergenic_region|MODIFIER|CQ054328-CQ054329|CQ054328-CQ054329|intergenic_region|CQ054328-CQ054329|||n.37022028A>G||||||
TSW	Cq2A	38155489	Cq2A_38155489	3.32e-07	A	G	downstream_gene_variant,intron_variant	c.*6744T>C,c.1451-154A>G		G|downstream_gene_variant|MODIFIER|CQ054394|CQ054394|transcript|CQ054394-RA|protein_coding||c.*6744T>C|||||2977|,G|intron_variant|MODIFIER|CQ054393|CQ054393|transcript|CQ054393-RA|protein_coding|2/3|c.1451-154A>G||||||
TSW	Cq4A	4963145	Cq4A_4963145	2.3e-08	A	T	upstream_gene_variant,downstream_gene_variant,intergenic_region	c.-3029A>T,c.*2756A>T,n.4963145A>T		T|upstream_gene_variant|MODIFIER|CQ035495|CQ035495|transcript|CQ035495-RA|protein_coding||c.-3029A>T|||||2566|,T|downstream_gene_variant|MODIFIER|CQ035494|CQ035494|transcript|CQ035494-RA|protein_coding||c.*2756A>T|||||2756|,T|intergenic_region|MODIFIER|CQ035494-CQ035495|CQ035494-CQ035495|intergenic_region|CQ035494-CQ035495|||n.4963145A>T||||||
TSW	Cq4A	51635760	Cq4A_51635760	9.98e-08	C	A	intergenic_region	n.51635760C>A		A|intergenic_region|MODIFIER|CQ037347-CQ037348|CQ037347-CQ037348|intergenic_region|CQ037347-CQ037348|||n.51635760C>A||||||
TSW	Cq4A	51668891	Cq4A_51668891	7.77e-08	T	G	intergenic_region	n.51668891T>G		G|intergenic_region|MODIFIER|CQ037347-CQ037348|CQ037347-CQ037348|intergenic_region|CQ037347-CQ037348|||n.51668891T>G||||||
TSW	Cq4A	51783707	Cq4A_51783707	5.03e-07	T	C	downstream_gene_variant,intergenic_region	c.*1976A>G,n.51783707T>C		C|downstream_gene_variant|MODIFIER|CQ037350|CQ037350|transcript|CQ037350-RA|protein_coding||c.*1976A>G|||||1976|,C|intergenic_region|MODIFIER|CQ037349-CQ037350|CQ037349-CQ037350|intergenic_region|CQ037349-CQ037350|||n.51783707T>C||||||
TSW	Cq4A	52147519	Cq4A_52147519	2.04e-07	A	C	intergenic_region	n.52147519A>C		C|intergenic_region|MODIFIER|CQ037373-CQ037374|CQ037373-CQ037374|intergenic_region|CQ037373-CQ037374|||n.52147519A>C||||||
TSW	Cq5A	1635534	Cq5A_1635534	8.92e-07	G	T	3_prime_UTR_variant,upstream_gene_variant,downstream_gene_variant	c.*396C>A,c.-1210C>A,c.*3862G>T		T|3_prime_UTR_variant|MODIFIER|CQ029015|CQ029015|transcript|CQ029015-RA|protein_coding|8/8|c.*396C>A|||||396|,T|upstream_gene_variant|MODIFIER|CQ029014|CQ029014|transcript|CQ029014-RA|protein_coding||c.-1210C>A|||||1210|,T|downstream_gene_variant|MODIFIER|CQ029012|CQ029012|transcript|CQ029012-RA|protein_coding||c.*3862G>T|||||1914|
TSW	Cq5A	3261053	Cq5A_3261053	4.42e-07	A	G	intergenic_region	n.3261053A>G		G|intergenic_region|MODIFIER|CQ029184-CQ029185|CQ029184-CQ029185|intergenic_region|CQ029184-CQ029185|||n.3261053A>G||||||
TSW	Cq5A	4773925	Cq5A_4773925	4.16e-08	T	C	synonymous_variant	c.510T>C	p.Ser170Ser	C|synonymous_variant|LOW|CQ029329|CQ029329|transcript|CQ029329-RA|protein_coding|3/9|c.510T>C|p.Ser170Ser|1099/3644|510/2448|170/815||
TSW	Cq5A	54467041	Cq5A_54467041	1.98e-07	A	C	downstream_gene_variant,intergenic_region	c.*58A>C,n.54467041A>C		C|downstream_gene_variant|MODIFIER|CQ031336|CQ031336|transcript|CQ031336-RA|protein_coding||c.*58A>C|||||58|,C|intergenic_region|MODIFIER|CQ031336-CQ031337|CQ031336-CQ031337|intergenic_region|CQ031336-CQ031337|||n.54467041A>C||||||
TSW	Cq6A	3457464	Cq6A_3457464	1.33e-07	C	A	upstream_gene_variant,upstream_gene_variant,upstream_gene_variant,intergenic_region	c.-4855G>T,c.-1123C>A,c.-3086C>A,n.3457464C>A		A|upstream_gene_variant|MODIFIER|CQ025688|CQ025688|transcript|CQ025688-RA|protein_coding||c.-4855G>T|||||4226|,A|upstream_gene_variant|MODIFIER|CQ025689|CQ025689|transcript|CQ025689-RA|protein_coding||c.-1123C>A|||||1032|,A|upstream_gene_variant|MODIFIER|CQ025690|CQ025690|transcript|CQ025690-RA|protein_coding||c.-3086C>A|||||2498|,A|intergenic_region|MODIFIER|CQ025688-CQ025689|CQ025688-CQ025689|i…
TSW	Cq6A	3457657	Cq6A_3457657	2.73e-08	T	C	upstream_gene_variant,upstream_gene_variant,upstream_gene_variant,intergenic_region	c.-5048A>G,c.-930T>C,c.-2893T>C,n.3457657T>C		C|upstream_gene_variant|MODIFIER|CQ025688|CQ025688|transcript|CQ025688-RA|protein_coding||c.-5048A>G|||||4419|,C|upstream_gene_variant|MODIFIER|CQ025689|CQ025689|transcript|CQ025689-RA|protein_coding||c.-930T>C|||||839|,C|upstream_gene_variant|MODIFIER|CQ025690|CQ025690|transcript|CQ025690-RA|protein_coding||c.-2893T>C|||||2305|,C|intergenic_region|MODIFIER|CQ025688-CQ025689|CQ025688-CQ025689|int…
TSW	Cq6A	54831037	Cq6A_54831037	1.19e-08	A	T	intron_variant	c.131-211T>A		T|intron_variant|MODIFIER|CQ027648|CQ027648|transcript|CQ027648-RA|protein_coding|2/4|c.131-211T>A||||||
TSW	Cq7A	1411954	Cq7A_1411954	1.15e-07	G	T	upstream_gene_variant,intergenic_region	c.-2287C>A,n.1411954G>T		T|upstream_gene_variant|MODIFIER|CQ041009|CQ041009|transcript|CQ041009-RA|protein_coding||c.-2287C>A|||||2145|,T|intergenic_region|MODIFIER|CQ041009-CQ041010|CQ041009-CQ041010|intergenic_region|CQ041009-CQ041010|||n.1411954G>T||||||
TSW	Cq7A	15572449	Cq7A_15572449	4.96e-07	C	G	intron_variant	c.618-289C>G		G|intron_variant|MODIFIER|CQ042356|CQ042356|transcript|CQ042356-RA|protein_coding|3/4|c.618-289C>G||||||
TSW	Cq7A	49043643	Cq7A_49043643	7.5e-07	G	A	downstream_gene_variant,intergenic_region	c.*1215G>A,n.49043643G>A		A|downstream_gene_variant|MODIFIER|CQ043237|CQ043237|transcript|CQ043237-RA|protein_coding||c.*1215G>A|||||1215|,A|intergenic_region|MODIFIER|CQ043237-CQ043238|CQ043237-CQ043238|intergenic_region|CQ043237-CQ043238|||n.49043643G>A||||||
TSW	Cq8A	27365254	Cq8A_27365254	1.11e-07	C	T	intergenic_region	n.27365254C>T		T|intergenic_region|MODIFIER|CQ039322-CQ039323|CQ039322-CQ039323|intergenic_region|CQ039322-CQ039323|||n.27365254C>T||||||
TSW	Cq1B	17166317	Cq1B_17166317	8.23e-07	G	C	intergenic_region	n.17166317G>C		C|intergenic_region|MODIFIER|CQ023383-CQ023384|CQ023383-CQ023384|intergenic_region|CQ023383-CQ023384|||n.17166317G>C||||||
TSW	Cq1B	19057243	Cq1B_19057243	1.18e-07	C	T	intergenic_region	n.19057243C>T		T|intergenic_region|MODIFIER|CQ023413-CQ023414|CQ023413-CQ023414|intergenic_region|CQ023413-CQ023414|||n.19057243C>T||||||
TSW	Cq5B	101698	Cq5B_101698	6.38e-07	A	G	downstream_gene_variant,intergenic_region	c.*3588A>G,n.101698A>G		G|downstream_gene_variant|MODIFIER|CQ003474|CQ003474|transcript|CQ003474-RA|protein_coding||c.*3588A>G|||||3588|,G|intergenic_region|MODIFIER|CQ003474-CQ003475|CQ003474-CQ003475|intergenic_region|CQ003474-CQ003475|||n.101698A>G||||||
TSW	Cq5B	115349	Cq5B_115349	1.6e-07	G	T	intergenic_region	n.115349G>T		T|intergenic_region|MODIFIER|CQ003474-CQ003475|CQ003474-CQ003475|intergenic_region|CQ003474-CQ003475|||n.115349G>T||||||
TSW	Cq5B	118474	Cq5B_118474	4.13e-07	A	C	upstream_gene_variant,intergenic_region	c.-5262A>C,n.118474A>C		C|upstream_gene_variant|MODIFIER|CQ003475|CQ003475|transcript|CQ003475-RA|protein_coding||c.-5262A>C|||||3733|,C|intergenic_region|MODIFIER|CQ003474-CQ003475|CQ003474-CQ003475|intergenic_region|CQ003474-CQ003475|||n.118474A>C||||||
TSW	Cq5B	118726	Cq5B_118726	1.16e-08	C	T	upstream_gene_variant,intergenic_region	c.-5010C>T,n.118726C>T		T|upstream_gene_variant|MODIFIER|CQ003475|CQ003475|transcript|CQ003475-RA|protein_coding||c.-5010C>T|||||3481|,T|intergenic_region|MODIFIER|CQ003474-CQ003475|CQ003474-CQ003475|intergenic_region|CQ003474-CQ003475|||n.118726C>T||||||
TSW	Cq5B	121901	Cq5B_121901	1.09e-07	T	A	upstream_gene_variant,intergenic_region	c.-1835T>A,n.121901T>A		A|upstream_gene_variant|MODIFIER|CQ003475|CQ003475|transcript|CQ003475-RA|protein_coding||c.-1835T>A|||||306|,A|intergenic_region|MODIFIER|CQ003474-CQ003475|CQ003474-CQ003475|intergenic_region|CQ003474-CQ003475|||n.121901T>A||||||
TSW	Cq5B	147332	Cq5B_147332	3.77e-07	A	T	upstream_gene_variant,intron_variant	c.-2348A>T,c.610-211A>T		T|upstream_gene_variant|MODIFIER|CQ003479|CQ003479|transcript|CQ003479-RA|protein_coding||c.-2348A>T|||||2133|,T|intron_variant|MODIFIER|CQ003478|CQ003478|transcript|CQ003478-RA|protein_coding|1/1|c.610-211A>T||||||
TSW	Cq5B	188491	Cq5B_188491	2.52e-07	T	G	upstream_gene_variant,upstream_gene_variant,intergenic_region	c.-2963T>G,c.-4886T>G,n.188491T>G		G|upstream_gene_variant|MODIFIER|CQ003481|CQ003481|transcript|CQ003481-RA|protein_coding||c.-2963T>G|||||2963|,G|upstream_gene_variant|MODIFIER|CQ003482|CQ003482|transcript|CQ003482-RA|protein_coding||c.-4886T>G|||||4886|,G|intergenic_region|MODIFIER|CQ003480-CQ003481|CQ003480-CQ003481|intergenic_region|CQ003480-CQ003481|||n.188491T>G||||||
TSW	Cq5B	228746	Cq5B_228746	5.97e-08	C	T	downstream_gene_variant,intergenic_region	c.*1227C>T,n.228746C>T		T|downstream_gene_variant|MODIFIER|CQ003486|CQ003486|transcript|CQ003486-RA|protein_coding||c.*1227C>T|||||499|,T|intergenic_region|MODIFIER|CQ003486-CQ003487|CQ003486-CQ003487|intergenic_region|CQ003486-CQ003487|||n.228746C>T||||||
TSW	Cq5B	285149	Cq5B_285149	3.02e-08	C	T	intron_variant	c.823-621G>A		T|intron_variant|MODIFIER|CQ003489|CQ003489|transcript|CQ003489-RA|protein_coding|2/10|c.823-621G>A||||||
TSW	Cq5B	295770	Cq5B_295770	3.29e-07	A	G	intergenic_region	n.295770A>G		G|intergenic_region|MODIFIER|CQ003489-CQ003490|CQ003489-CQ003490|intergenic_region|CQ003489-CQ003490|||n.295770A>G||||||
TSW	Cq5B	309305	Cq5B_309305	8.55e-07	C	T	intergenic_region	n.309305C>T		T|intergenic_region|MODIFIER|CQ003489-CQ003490|CQ003489-CQ003490|intergenic_region|CQ003489-CQ003490|||n.309305C>T||||||
TSW	Cq5B	333082	Cq5B_333082	4.92e-07	A	C	upstream_gene_variant,downstream_gene_variant,downstream_gene_variant,intergenic_region	c.-3537T>G,c.*2418T>G,c.*4511T>G,n.333082A>C		C|upstream_gene_variant|MODIFIER|CQ003491|CQ003491|transcript|CQ003491-RA|protein_coding||c.-3537T>G|||||3129|,C|downstream_gene_variant|MODIFIER|CQ003492|CQ003492|transcript|CQ003492-RA|protein_coding||c.*2418T>G|||||2418|,C|downstream_gene_variant|MODIFIER|CQ003493|CQ003493|transcript|CQ003493-RA|protein_coding||c.*4511T>G|||||3971|,C|intergenic_region|MODIFIER|CQ003491-CQ003492|CQ003491-CQ0034…
TSW	Cq5B	343873	Cq5B_343873	6.81e-09	C	A	upstream_gene_variant,intergenic_region	c.-1263G>T,n.343873C>A		A|upstream_gene_variant|MODIFIER|CQ003493|CQ003493|transcript|CQ003493-RA|protein_coding||c.-1263G>T|||||1263|,A|intergenic_region|MODIFIER|CQ003493-CQ003494|CQ003493-CQ003494|intergenic_region|CQ003493-CQ003494|||n.343873C>A||||||
TSW	Cq5B	418783	Cq5B_418783	6.01e-07	C	T	synonymous_variant,downstream_gene_variant,downstream_gene_variant	c.273C>T,c.*5092C>T,c.*1703C>T	p.Ala91Ala,.,.	T|synonymous_variant|LOW|CQ003504|CQ003504|transcript|CQ003504-RA|protein_coding|1/3|c.273C>T|p.Ala91Ala|273/1152|273/1152|91/383||WARNING_TRANSCRIPT_NO_START_CODON,T|downstream_gene_variant|MODIFIER|CQ003502|CQ003502|transcript|CQ003502-RA|protein_coding||c.*5092C>T|||||2654|,T|downstream_gene_variant|MODIFIER|CQ003503|CQ003503|transcript|CQ003503-RA|protein_coding||c.*1703C>T|||||1703|
TSW	Cq5B	638370	Cq5B_638370	5.25e-08	T	A	intergenic_region	n.638370T>A		A|intergenic_region|MODIFIER|CQ003524-CQ003525|CQ003524-CQ003525|intergenic_region|CQ003524-CQ003525|||n.638370T>A||||||
TSW	Cq5B	743963	Cq5B_743963	1.69e-07	C	T	intergenic_region	n.743963C>T		T|intergenic_region|MODIFIER|CQ003532-CQ003533|CQ003532-CQ003533|intergenic_region|CQ003532-CQ003533|||n.743963C>T||||||
TSW	Cq5B	744611	Cq5B_744611	3.73e-08	T	C	intergenic_region	n.744611T>C		C|intergenic_region|MODIFIER|CQ003532-CQ003533|CQ003532-CQ003533|intergenic_region|CQ003532-CQ003533|||n.744611T>C||||||
TSW	Cq5B	787811	Cq5B_787811	3.72e-07	A	G	missense_variant	c.1402A>G	p.Ile468Val	G|missense_variant|MODERATE|CQ003539|CQ003539|transcript|CQ003539-RA|protein_coding|11/12|c.1402A>G|p.Ile468Val|1407/1950|1402/1821|468/606||
TSW	Cq5B	787815	Cq5B_787815	4.16e-07	A	C	missense_variant	c.1406A>C	p.Asp469Ala	C|missense_variant|MODERATE|CQ003539|CQ003539|transcript|CQ003539-RA|protein_coding|11/12|c.1406A>C|p.Asp469Ala|1411/1950|1406/1821|469/606||
TSW	Cq5B	787816	Cq5B_787816	4.16e-07	T	G	missense_variant	c.1407T>G	p.Asp469Glu	G|missense_variant|MODERATE|CQ003539|CQ003539|transcript|CQ003539-RA|protein_coding|11/12|c.1407T>G|p.Asp469Glu|1412/1950|1407/1821|469/606||
TSW	Cq5B	794639	Cq5B_794639	2.92e-07	A	G	upstream_gene_variant,upstream_gene_variant,downstream_gene_variant,intergenic_region	c.-476A>G,c.-3454A>G,c.*4800A>G,n.794639A>G		G|upstream_gene_variant|MODIFIER|CQ003540|CQ003540|transcript|CQ003540-RA|protein_coding||c.-476A>G|||||329|,G|upstream_gene_variant|MODIFIER|CQ003541|CQ003541|transcript|CQ003541-RA|protein_coding||c.-3454A>G|||||3310|,G|downstream_gene_variant|MODIFIER|CQ003539|CQ003539|transcript|CQ003539-RA|protein_coding||c.*4800A>G|||||4676|,G|intergenic_region|MODIFIER|CQ003539-CQ003540|CQ003539-CQ003540|i…
TSW	Cq5B	802028	Cq5B_802028	7.45e-07	G	T	upstream_gene_variant,upstream_gene_variant,downstream_gene_variant,downstream_gene_variant,intergenic_region	c.-866G>T,c.-3491G>T,c.*4906G>T,c.*2902G>T,n.802028G>T		T|upstream_gene_variant|MODIFIER|CQ003542|CQ003542|transcript|CQ003542-RA|protein_coding||c.-866G>T|||||756|,T|upstream_gene_variant|MODIFIER|CQ003543|CQ003543|transcript|CQ003543-RA|protein_coding||c.-3491G>T|||||3263|,T|downstream_gene_variant|MODIFIER|CQ003540|CQ003540|transcript|CQ003540-RA|protein_coding||c.*4906G>T|||||4638|,T|downstream_gene_variant|MODIFIER|CQ003541|CQ003541|transcript|CQ…
TSW	Cq5B	812915	Cq5B_812915	7.33e-07	G	T	3_prime_UTR_variant,upstream_gene_variant,downstream_gene_variant	c.*97G>T,c.-1917G>T,c.*4848G>T		T|3_prime_UTR_variant|MODIFIER|CQ003544|CQ003544|transcript|CQ003544-RA|protein_coding|3/3|c.*97G>T|||||97|,T|upstream_gene_variant|MODIFIER|CQ003545|CQ003545|transcript|CQ003545-RA|protein_coding||c.-1917G>T|||||1564|,T|downstream_gene_variant|MODIFIER|CQ003543|CQ003543|transcript|CQ003543-RA|protein_coding||c.*4848G>T|||||4547|
TSW	Cq5B	815484	Cq5B_815484	3.24e-07	A	G	downstream_gene_variant,intron_variant	c.*2666A>G,c.303+127A>G		G|downstream_gene_variant|MODIFIER|CQ003544|CQ003544|transcript|CQ003544-RA|protein_coding||c.*2666A>G|||||2268|,G|intron_variant|MODIFIER|CQ003545|CQ003545|transcript|CQ003545-RA|protein_coding|3/10|c.303+127A>G||||||
TSW	Cq5B	816348	Cq5B_816348	3.02e-07	A	C	downstream_gene_variant,intron_variant	c.*3530A>C,c.534+136A>C		C|downstream_gene_variant|MODIFIER|CQ003544|CQ003544|transcript|CQ003544-RA|protein_coding||c.*3530A>C|||||3132|,C|intron_variant|MODIFIER|CQ003545|CQ003545|transcript|CQ003545-RA|protein_coding|6/10|c.534+136A>C||||||
TSW	Cq5B	819318	Cq5B_819318	8.13e-07	A	G	intron_variant	c.1163-507A>G		G|intron_variant|MODIFIER|CQ003545|CQ003545|transcript|CQ003545-RA|protein_coding|10/10|c.1163-507A>G||||||
TSW	Cq5B	829558	Cq5B_829558	7.59e-07	C	T	upstream_gene_variant,intergenic_region	c.-2745C>T,n.829558C>T		T|upstream_gene_variant|MODIFIER|CQ003546|CQ003546|transcript|CQ003546-RA|protein_coding||c.-2745C>T|||||2406|,T|intergenic_region|MODIFIER|CQ003545-CQ003546|CQ003545-CQ003546|intergenic_region|CQ003545-CQ003546|||n.829558C>T||||||
TSW	Cq5B	842463	Cq5B_842463	9.17e-07	C	T	intron_variant	c.-1542-362C>T		T|intron_variant|MODIFIER|CQ003547|CQ003547|transcript|CQ003547-RA|protein_coding|1/7|c.-1542-362C>T||||||
TSW	Cq5B	843202	Cq5B_843202	6.38e-08	T	C	5_prime_UTR_variant	c.-1367T>C		C|5_prime_UTR_variant|MODIFIER|CQ003547|CQ003547|transcript|CQ003547-RA|protein_coding|3/8|c.-1367T>C|||||8116|
TSW	Cq5B	847127	Cq5B_847127	3.5e-07	G	A	intron_variant	c.-1067+2874G>A		A|intron_variant|MODIFIER|CQ003547|CQ003547|transcript|CQ003547-RA|protein_coding|5/7|c.-1067+2874G>A||||||
TSW	Cq5B	853885	Cq5B_853885	8.64e-07	C	T	3_prime_UTR_variant,upstream_gene_variant	c.*555C>T,c.-3382C>T		T|3_prime_UTR_variant|MODIFIER|CQ003547|CQ003547|transcript|CQ003547-RA|protein_coding|7/8|c.*555C>T|||||555|,T|upstream_gene_variant|MODIFIER|CQ003548|CQ003548|transcript|CQ003548-RA|protein_coding||c.-3382C>T|||||3382|
TSW	Cq5B	865708	Cq5B_865708	1.58e-07	T	G	3_prime_UTR_variant,downstream_gene_variant,downstream_gene_variant	c.*1349A>C,c.*4007T>G,c.*996T>G		G|3_prime_UTR_variant|MODIFIER|CQ003551|CQ003551|transcript|CQ003551-RA|protein_coding|5/5|c.*1349A>C|||||1869|,G|downstream_gene_variant|MODIFIER|CQ003549|CQ003549|transcript|CQ003549-RA|protein_coding||c.*4007T>G|||||3330|,G|downstream_gene_variant|MODIFIER|CQ003550|CQ003550|transcript|CQ003550-RA|protein_coding||c.*996T>G|||||996|
TSW	Cq5B	872584	Cq5B_872584	2.44e-08	T	C	downstream_gene_variant,intron_variant	c.*4656A>G,c.601+2762A>G		C|downstream_gene_variant|MODIFIER|CQ003552|CQ003552|transcript|CQ003552-RA|protein_coding||c.*4656A>G|||||4656|WARNING_TRANSCRIPT_NO_START_CODON,C|intron_variant|MODIFIER|CQ003551|CQ003551|transcript|CQ003551-RA|protein_coding|1/4|c.601+2762A>G||||||
TSW	Cq5B	873640	Cq5B_873640	2.89e-10	C	T	downstream_gene_variant,intron_variant	c.*3600G>A,c.601+1706G>A		T|downstream_gene_variant|MODIFIER|CQ003552|CQ003552|transcript|CQ003552-RA|protein_coding||c.*3600G>A|||||3600|WARNING_TRANSCRIPT_NO_START_CODON,T|intron_variant|MODIFIER|CQ003551|CQ003551|transcript|CQ003551-RA|protein_coding|1/4|c.601+1706G>A||||||
TSW	Cq5B	877172	Cq5B_877172	5.97e-07	G	A	upstream_gene_variant,upstream_gene_variant,downstream_gene_variant,intergenic_region	c.-1226C>T,c.-3758G>A,c.*68C>T,n.877172G>A		A|upstream_gene_variant|MODIFIER|CQ003551|CQ003551|transcript|CQ003551-RA|protein_coding||c.-1226C>T|||||932|,A|upstream_gene_variant|MODIFIER|CQ003553|CQ003553|transcript|CQ003553-RA|protein_coding||c.-3758G>A|||||3758|,A|downstream_gene_variant|MODIFIER|CQ003552|CQ003552|transcript|CQ003552-RA|protein_coding||c.*68C>T|||||68|WARNING_TRANSCRIPT_NO_START_CODON,A|intergenic_region|MODIFIER|CQ00355…
TSW	Cq5B	891427	Cq5B_891427	6.07e-08	A	T	downstream_gene_variant,intergenic_region	c.*1293T>A,n.891427A>T		T|downstream_gene_variant|MODIFIER|CQ003554|CQ003554|transcript|CQ003554-RA|protein_coding||c.*1293T>A|||||1293|,T|intergenic_region|MODIFIER|CQ003553-CQ003554|CQ003553-CQ003554|intergenic_region|CQ003553-CQ003554|||n.891427A>T||||||
TSW	Cq5B	893574	Cq5B_893574	6.57e-07	A	G	missense_variant	c.242T>C	p.Val81Ala	G|missense_variant|MODERATE|CQ003554|CQ003554|transcript|CQ003554-RA|protein_coding|1/3|c.242T>C|p.Val81Ala|242/384|242/384|81/127||
TSW	Cq5B	897915	Cq5B_897915	3.95e-07	C	G	upstream_gene_variant,intergenic_region	c.-4100G>C,n.897915C>G		G|upstream_gene_variant|MODIFIER|CQ003554|CQ003554|transcript|CQ003554-RA|protein_coding||c.-4100G>C|||||4100|,G|intergenic_region|MODIFIER|CQ003554-CQ003555|CQ003554-CQ003555|intergenic_region|CQ003554-CQ003555|||n.897915C>G||||||
TSW	Cq5B	898561	Cq5B_898561	5.5e-08	A	G	upstream_gene_variant,intergenic_region	c.-4746T>C,n.898561A>G		G|upstream_gene_variant|MODIFIER|CQ003554|CQ003554|transcript|CQ003554-RA|protein_coding||c.-4746T>C|||||4746|,G|intergenic_region|MODIFIER|CQ003554-CQ003555|CQ003554-CQ003555|intergenic_region|CQ003554-CQ003555|||n.898561A>G||||||
TSW	Cq5B	902420	Cq5B_902420	2.25e-07	G	A	intergenic_region	n.902420G>A		A|intergenic_region|MODIFIER|CQ003554-CQ003555|CQ003554-CQ003555|intergenic_region|CQ003554-CQ003555|||n.902420G>A||||||
TSW	Cq5B	915183	Cq5B_915183	5.28e-07	T	A	missense_variant,upstream_gene_variant	c.652T>A,c.-2715T>A	p.Tyr218Asn,.	A|missense_variant|MODERATE|CQ003555|CQ003555|transcript|CQ003555-RA|protein_coding|1/1|c.652T>A|p.Tyr218Asn|652/1860|652/1860|218/619||,A|upstream_gene_variant|MODIFIER|CQ003556|CQ003556|transcript|CQ003556-RA|protein_coding||c.-2715T>A|||||1779|
TSW	Cq5B	922338	Cq5B_922338	2.97e-07	A	T	upstream_gene_variant,downstream_gene_variant,downstream_gene_variant,intergenic_region	c.-519A>T,c.*1904A>T,c.*7145T>A,n.922338A>T		T|upstream_gene_variant|MODIFIER|CQ003557|CQ003557|transcript|CQ003557-RA|protein_coding||c.-519A>T|||||304|,T|downstream_gene_variant|MODIFIER|CQ003556|CQ003556|transcript|CQ003556-RA|protein_coding||c.*1904A>T|||||1615|,T|downstream_gene_variant|MODIFIER|CQ003558|CQ003558|transcript|CQ003558-RA|protein_coding||c.*7145T>A|||||4409|,T|intergenic_region|MODIFIER|CQ003556-CQ003557|CQ003556-CQ003557…
TSW	Cq5B	932522	Cq5B_932522	7.29e-08	A	T	downstream_gene_variant,intron_variant	c.*3626A>T,c.515-774T>A		T|downstream_gene_variant|MODIFIER|CQ003557|CQ003557|transcript|CQ003557-RA|protein_coding||c.*3626A>T|||||2002|,T|intron_variant|MODIFIER|CQ003558|CQ003558|transcript|CQ003558-RA|protein_coding|1/4|c.515-774T>A||||||
TSW	Cq5B	1129011	Cq5B_1129011	5.07e-07	A	T	intergenic_region	n.1129011A>T		T|intergenic_region|MODIFIER|CQ003579-CQ003580|CQ003579-CQ003580|intergenic_region|CQ003579-CQ003580|||n.1129011A>T||||||
TSW	Cq5B	1992138	Cq5B_1992138	9.4e-08	T	C	intron_variant	c.-195+2044T>C		C|intron_variant|MODIFIER|CQ003670|CQ003670|transcript|CQ003670-RA|protein_coding|2/16|c.-195+2044T>C||||||
TSW	Cq5B	2438550	Cq5B_2438550	8.09e-07	G	A	intron_variant	c.3048-52G>A		A|intron_variant|MODIFIER|CQ003708|CQ003708|transcript|CQ003708-RA|protein_coding|7/8|c.3048-52G>A||||||
TSW	Cq5B	2515200	Cq5B_2515200	2.58e-08	G	A	upstream_gene_variant,downstream_gene_variant,intergenic_region	c.-3728G>A,c.*1319G>A,n.2515200G>A		A|upstream_gene_variant|MODIFIER|CQ003721|CQ003721|transcript|CQ003721-RA|protein_coding||c.-3728G>A|||||3148|,A|downstream_gene_variant|MODIFIER|CQ003720|CQ003720|transcript|CQ003720-RA|protein_coding||c.*1319G>A|||||862|,A|intergenic_region|MODIFIER|CQ003720-CQ003721|CQ003720-CQ003721|intergenic_region|CQ003720-CQ003721|||n.2515200G>A||||||
TSW	Cq5B	3517365	Cq5B_3517365	2.5e-07	A	T	missense_variant	c.239A>T	p.Tyr80Phe	T|missense_variant|MODERATE|CQ003824|CQ003824|transcript|CQ003824-RA|protein_coding|2/4|c.239A>T|p.Tyr80Phe|336/481|239/384|80/127||
TSW	Cq5B	3670858	Cq5B_3670858	2.93e-08	T	G	missense_variant	c.2146T>G	p.Cys716Gly	G|missense_variant|MODERATE|CQ003843|CQ003843|transcript|CQ003843-RA|protein_coding|12/23|c.2146T>G|p.Cys716Gly|2436/5080|2146/4263|716/1420||
TSW	Cq7B	23793472	Cq7B_23793472	6.42e-07	T	A	intergenic_region	n.23793472T>A		A|intergenic_region|MODIFIER|CQ008896-CQ008897|CQ008896-CQ008897|intergenic_region|CQ008896-CQ008897|||n.23793472T>A||||||
TSW	Cq7B	23801806	Cq7B_23801806	1.17e-08	C	T	intergenic_region	n.23801806C>T		T|intergenic_region|MODIFIER|CQ008896-CQ008897|CQ008896-CQ008897|intergenic_region|CQ008896-CQ008897|||n.23801806C>T||||||
TSW	Cq7B	24491379	Cq7B_24491379	4.82e-07	G	C	intergenic_region	n.24491379G>C		C|intergenic_region|MODIFIER|CQ008904-CQ008905|CQ008904-CQ008905|intergenic_region|CQ008904-CQ008905|||n.24491379G>C||||||
TSW	Cq8B	58914313	Cq8B_58914313	1.77e-08	C	T	upstream_gene_variant,intergenic_region	c.-1882G>A,n.58914313C>T		T|upstream_gene_variant|MODIFIER|CQ011893|CQ011893|transcript|CQ011893-RA|protein_coding||c.-1882G>A|||||1388|,T|intergenic_region|MODIFIER|CQ011893-CQ011894|CQ011893-CQ011894|intergenic_region|CQ011893-CQ011894|||n.58914313C>T||||||
TSW	Cq8B	58917136	Cq8B_58917136	2.96e-09	G	A	upstream_gene_variant,intergenic_region	c.-4705C>T,n.58917136G>A		A|upstream_gene_variant|MODIFIER|CQ011893|CQ011893|transcript|CQ011893-RA|protein_coding||c.-4705C>T|||||4211|,A|intergenic_region|MODIFIER|CQ011893-CQ011894|CQ011893-CQ011894|intergenic_region|CQ011893-CQ011894|||n.58917136G>A||||||
TSW	Cq8B	58949293	Cq8B_58949293	6.61e-09	A	T	intron_variant	c.1639-839T>A		T|intron_variant|MODIFIER|CQ011895|CQ011895|transcript|CQ011895-RA|protein_coding|5/11|c.1639-839T>A||||||
TSW	Cq8B	58950339	Cq8B_58950339	9.48e-10	T	C	intron_variant	c.1638+1570A>G		C|intron_variant|MODIFIER|CQ011895|CQ011895|transcript|CQ011895-RA|protein_coding|5/11|c.1638+1570A>G||||||
TSW	Cq8B	58955359	Cq8B_58955359	2.65e-07	T	C	missense_variant	c.1435A>G	p.Asn479Asp	C|missense_variant|MODERATE|CQ011895|CQ011895|transcript|CQ011895-RA|protein_coding|4/12|c.1435A>G|p.Asn479Asp|1637/2936|1435/2175|479/724||
TSW	Cq8B	58964410	Cq8B_58964410	1.66e-07	A	G	synonymous_variant	c.30T>C	p.Gly10Gly	G|synonymous_variant|LOW|CQ011895|CQ011895|transcript|CQ011895-RA|protein_coding|2/12|c.30T>C|p.Gly10Gly|232/2936|30/2175|10/724||
TSW	Cq8B	58970640	Cq8B_58970640	4.79e-09	C	T	intergenic_region	n.58970640C>T		T|intergenic_region|MODIFIER|CQ011895-CQ011896|CQ011895-CQ011896|intergenic_region|CQ011895-CQ011896|||n.58970640C>T||||||
TSW	Cq8B	58975670	Cq8B_58975670	3.19e-09	A	C	intergenic_region	n.58975670A>C		C|intergenic_region|MODIFIER|CQ011895-CQ011896|CQ011895-CQ011896|intergenic_region|CQ011895-CQ011896|||n.58975670A>C||||||
TSW	Cq8B	58976943	Cq8B_58976943	8.51e-10	A	C	intergenic_region	n.58976943A>C		C|intergenic_region|MODIFIER|CQ011895-CQ011896|CQ011895-CQ011896|intergenic_region|CQ011895-CQ011896|||n.58976943A>C||||||
TSW	Cq8B	58981731	Cq8B_58981731	4.02e-13	A	G	upstream_gene_variant,intergenic_region	c.-2510A>G,n.58981731A>G		G|upstream_gene_variant|MODIFIER|CQ011896|CQ011896|transcript|CQ011896-RA|protein_coding||c.-2510A>G|||||2347|,G|intergenic_region|MODIFIER|CQ011895-CQ011896|CQ011895-CQ011896|intergenic_region|CQ011895-CQ011896|||n.58981731A>G||||||
TSW	Cq8B	58999462	Cq8B_58999462	1e-09	T	C	intron_variant	c.1351-884A>G		C|intron_variant|MODIFIER|CQ011897|CQ011897|transcript|CQ011897-RA|protein_coding|12/20|c.1351-884A>G||||||
TSW	Cq8B	59003066	Cq8B_59003066	5.94e-10	A	T	synonymous_variant	c.798T>A	p.Ala266Ala	T|synonymous_variant|LOW|CQ011897|CQ011897|transcript|CQ011897-RA|protein_coding|9/21|c.798T>A|p.Ala266Ala|1198/3282|798/2532|266/843||
TSW	Cq8B	59019417	Cq8B_59019417	6.96e-08	T	C	upstream_gene_variant,intergenic_region	c.-4808T>C,n.59019417T>C		C|upstream_gene_variant|MODIFIER|CQ011898|CQ011898|transcript|CQ011898-RA|protein_coding||c.-4808T>C|||||4808|,C|intergenic_region|MODIFIER|CQ011897-CQ011898|CQ011897-CQ011898|intergenic_region|CQ011897-CQ011898|||n.59019417T>C||||||
TSW	Cq8B	59025351	Cq8B_59025351	3.8e-08	A	G	downstream_gene_variant,intergenic_region	c.*863A>G,n.59025351A>G		G|downstream_gene_variant|MODIFIER|CQ011898|CQ011898|transcript|CQ011898-RA|protein_coding||c.*863A>G|||||863|,G|intergenic_region|MODIFIER|CQ011898-CQ011899|CQ011898-CQ011899|intergenic_region|CQ011898-CQ011899|||n.59025351A>G||||||
TSW	Cq8B	59050792	Cq8B_59050792	6.81e-08	G	A	intergenic_region	n.59050792G>A		A|intergenic_region|MODIFIER|CQ011898-CQ011899|CQ011898-CQ011899|intergenic_region|CQ011898-CQ011899|||n.59050792G>A||||||
TSW	Cq8B	59109348	Cq8B_59109348	2.27e-09	G	C	intergenic_region	n.59109348G>C		C|intergenic_region|MODIFIER|CQ011900-CQ011901|CQ011900-CQ011901|intergenic_region|CQ011900-CQ011901|||n.59109348G>C||||||
TSW	Cq8B	59172006	Cq8B_59172006	2.22e-10	A	G	intergenic_region	n.59172006A>G		G|intergenic_region|MODIFIER|CQ011900-CQ011901|CQ011900-CQ011901|intergenic_region|CQ011900-CQ011901|||n.59172006A>G||||||
TSW	Cq8B	59173968	Cq8B_59173968	1.49e-07	T	C	intergenic_region	n.59173968T>C		C|intergenic_region|MODIFIER|CQ011900-CQ011901|CQ011900-CQ011901|intergenic_region|CQ011900-CQ011901|||n.59173968T>C||||||
TSW	Cq8B	59258142	Cq8B_59258142	1.72e-07	T	C	intergenic_region	n.59258142T>C		C|intergenic_region|MODIFIER|CQ011901-CQ011902|CQ011901-CQ011902|intergenic_region|CQ011901-CQ011902|||n.59258142T>C||||||
TSW	Cq8B	59258153	Cq8B_59258153	5.17e-07	T	G	intergenic_region	n.59258153T>G		G|intergenic_region|MODIFIER|CQ011901-CQ011902|CQ011901-CQ011902|intergenic_region|CQ011901-CQ011902|||n.59258153T>G||||||
TSW	Cq8B	59263794	Cq8B_59263794	1.83e-08	T	A	intergenic_region	n.59263794T>A		A|intergenic_region|MODIFIER|CQ011901-CQ011902|CQ011901-CQ011902|intergenic_region|CQ011901-CQ011902|||n.59263794T>A||||||
TSW	Cq8B	59400725	Cq8B_59400725	3.03e-09	C	G	upstream_gene_variant,upstream_gene_variant,intergenic_region	c.-3923C>G,c.-3923C>G,n.59400725C>G		G|upstream_gene_variant|MODIFIER|CQ011904|CQ011904|transcript|CQ011904-RA|protein_coding||c.-3923C>G|||||3742|,G|upstream_gene_variant|MODIFIER|CQ011904|CQ011904|transcript|CQ011904-RB|protein_coding||c.-3923C>G|||||3840|,G|intergenic_region|MODIFIER|CQ011903-CQ011904|CQ011903-CQ011904|intergenic_region|CQ011903-CQ011904|||n.59400725C>G||||||
TSW	Cq8B	62482721	Cq8B_62482721	1.46e-12	C	T	downstream_gene_variant,intergenic_region	c.*4376C>T,n.62482721C>T		T|downstream_gene_variant|MODIFIER|CQ012055|CQ012055|transcript|CQ012055-RA|protein_coding||c.*4376C>T|||||3778|,T|intergenic_region|MODIFIER|CQ012055-CQ012056|CQ012055-CQ012056|intergenic_region|CQ012055-CQ012056|||n.62482721C>T||||||
TSW	Cq8B	63229326	Cq8B_63229326	1.28e-08	G	T	upstream_gene_variant,intergenic_region	c.-3318G>T,n.63229326G>T		T|upstream_gene_variant|MODIFIER|CQ012105|CQ012105|transcript|CQ012105-RA|protein_coding||c.-3318G>T|||||1989|,T|intergenic_region|MODIFIER|CQ012104-CQ012105|CQ012104-CQ012105|intergenic_region|CQ012104-CQ012105|||n.63229326G>T||||||
TSW	Cq8B	63233423	Cq8B_63233423	5.16e-10	T	A	synonymous_variant	c.780T>A	p.Val260Val	A|synonymous_variant|LOW|CQ012105|CQ012105|transcript|CQ012105-RA|protein_coding|2/6|c.780T>A|p.Val260Val|1511/3021|780/1752|260/583||
TSW	Cq8B	63234796	Cq8B_63234796	9.13e-09	A	T	intron_variant	c.1324+511A>T		T|intron_variant|MODIFIER|CQ012105|CQ012105|transcript|CQ012105-RA|protein_coding|4/5|c.1324+511A>T||||||
TSW	Cq8B	63236990	Cq8B_63236990	2.27e-08	T	C	intron_variant	c.1325-163T>C		C|intron_variant|MODIFIER|CQ012105|CQ012105|transcript|CQ012105-RA|protein_coding|4/5|c.1325-163T>C||||||
TSW	Cq8B	63390225	Cq8B_63390225	3.25e-09	A	G	intergenic_region	n.63390225A>G		G|intergenic_region|MODIFIER|CQ012115-CQ012116|CQ012115-CQ012116|intergenic_region|CQ012115-CQ012116|||n.63390225A>G||||||
TSW	Cq8B	63784377	Cq8B_63784377	3.41e-09	T	C	upstream_gene_variant,intergenic_region	c.-3281T>C,n.63784377T>C		C|upstream_gene_variant|MODIFIER|CQ012136|CQ012136|transcript|CQ012136-RA|protein_coding||c.-3281T>C|||||2718|,C|intergenic_region|MODIFIER|CQ012134-CQ012136|CQ012134-CQ012136|intergenic_region|CQ012134-CQ012136|||n.63784377T>C||||||
TSW	Cq8B	64327361	Cq8B_64327361	4.83e-08	C	A	intergenic_region	n.64327361C>A		A|intergenic_region|MODIFIER|CQ012171-CQ012172|CQ012171-CQ012172|intergenic_region|CQ012171-CQ012172|||n.64327361C>A||||||
TSW	Cq8B	64681599	Cq8B_64681599	1.59e-07	T	C	upstream_gene_variant,upstream_gene_variant,intron_variant	c.-2295A>G,c.-3364T>C,c.142-54A>G		C|upstream_gene_variant|MODIFIER|CQ012198|CQ012198|transcript|CQ012198-RA|protein_coding||c.-2295A>G|||||2295|,C|upstream_gene_variant|MODIFIER|CQ012200|CQ012200|transcript|CQ012200-RA|protein_coding||c.-3364T>C|||||3197|,C|intron_variant|MODIFIER|CQ012199|CQ012199|transcript|CQ012199-RA|protein_coding|2/4|c.142-54A>G||||||
TSW	Cq8B	64682082	Cq8B_64682082	1.02e-08	G	A	upstream_gene_variant,upstream_gene_variant,intron_variant	c.-2778C>T,c.-2881G>A,c.142-537C>T		A|upstream_gene_variant|MODIFIER|CQ012198|CQ012198|transcript|CQ012198-RA|protein_coding||c.-2778C>T|||||2778|,A|upstream_gene_variant|MODIFIER|CQ012200|CQ012200|transcript|CQ012200-RA|protein_coding||c.-2881G>A|||||2714|,A|intron_variant|MODIFIER|CQ012199|CQ012199|transcript|CQ012199-RA|protein_coding|2/4|c.142-537C>T||||||
TSW	Cq8B	64686034	Cq8B_64686034	6.62e-09	G	C	upstream_gene_variant,intron_variant	c.-2820C>G,c.405+667G>C		C|upstream_gene_variant|MODIFIER|CQ012199|CQ012199|transcript|CQ012199-RA|protein_coding||c.-2820C>G|||||2242|,C|intron_variant|MODIFIER|CQ012200|CQ012200|transcript|CQ012200-RA|protein_coding|1/14|c.405+667G>C||||||
TSW	Cq8B	64690707	Cq8B_64690707	2.69e-07	C	T	downstream_gene_variant,intron_variant	c.*8383G>A,c.1853-184C>T		T|downstream_gene_variant|MODIFIER|CQ012201|CQ012201|transcript|CQ012201-RA|protein_coding||c.*8383G>A|||||3737|,T|intron_variant|MODIFIER|CQ012200|CQ012200|transcript|CQ012200-RA|protein_coding|9/14|c.1853-184C>T||||||
TSW	Cq8B	64693391	Cq8B_64693391	1.43e-07	T	C	3_prime_UTR_variant,downstream_gene_variant	c.*310T>C,c.*5699A>G		C|3_prime_UTR_variant|MODIFIER|CQ012200|CQ012200|transcript|CQ012200-RA|protein_coding|15/15|c.*310T>C|||||310|,C|downstream_gene_variant|MODIFIER|CQ012201|CQ012201|transcript|CQ012201-RA|protein_coding||c.*5699A>G|||||1053|
TSW	Cq8B	64694818	Cq8B_64694818	1.91e-08	A	T	3_prime_UTR_variant,downstream_gene_variant	c.*949T>A,c.*1737A>T		T|3_prime_UTR_variant|MODIFIER|CQ012201|CQ012201|transcript|CQ012201-RA|protein_coding|14/14|c.*949T>A|||||4272|,T|downstream_gene_variant|MODIFIER|CQ012200|CQ012200|transcript|CQ012200-RA|protein_coding||c.*1737A>T|||||791|
TSW	Cq8B	64695927	Cq8B_64695927	5.28e-07	T	A	downstream_gene_variant,intron_variant	c.*2846T>A,c.*646-341A>T		A|downstream_gene_variant|MODIFIER|CQ012200|CQ012200|transcript|CQ012200-RA|protein_coding||c.*2846T>A|||||1900|,A|intron_variant|MODIFIER|CQ012201|CQ012201|transcript|CQ012201-RA|protein_coding|11/13|c.*646-341A>T||||||
TSW	Cq8B	64699015	Cq8B_64699015	7.08e-07	T	C	3_prime_UTR_variant,downstream_gene_variant	c.*75A>G,c.*5934T>C		C|3_prime_UTR_variant|MODIFIER|CQ012201|CQ012201|transcript|CQ012201-RA|protein_coding|7/14|c.*75A>G|||||75|,C|downstream_gene_variant|MODIFIER|CQ012200|CQ012200|transcript|CQ012200-RA|protein_coding||c.*5934T>C|||||4988|
TSW	Cq8B	64700012	Cq8B_64700012	2.8e-08	T	C	intron_variant	c.438-838A>G		C|intron_variant|MODIFIER|CQ012201|CQ012201|transcript|CQ012201-RA|protein_coding|6/13|c.438-838A>G||||||
TSW	Cq8B	64702424	Cq8B_64702424	4.89e-07	C	A	intron_variant	c.298-86G>T		A|intron_variant|MODIFIER|CQ012201|CQ012201|transcript|CQ012201-RA|protein_coding|4/13|c.298-86G>T||||||
TSW	Cq8B	64702592	Cq8B_64702592	2.22e-07	A	C	intron_variant	c.298-254T>G		C|intron_variant|MODIFIER|CQ012201|CQ012201|transcript|CQ012201-RA|protein_coding|4/13|c.298-254T>G||||||
TSW	Cq8B	64707077	Cq8B_64707077	7.09e-07	T	G	upstream_gene_variant,intergenic_region	c.-1113A>C,n.64707077T>G		G|upstream_gene_variant|MODIFIER|CQ012201|CQ012201|transcript|CQ012201-RA|protein_coding||c.-1113A>C|||||896|,G|intergenic_region|MODIFIER|CQ012201-CQ012202|CQ012201-CQ012202|intergenic_region|CQ012201-CQ012202|||n.64707077T>G||||||
TSW	Cq8B	64707178	Cq8B_64707178	5.02e-08	A	T	upstream_gene_variant,intergenic_region	c.-1214T>A,n.64707178A>T		T|upstream_gene_variant|MODIFIER|CQ012201|CQ012201|transcript|CQ012201-RA|protein_coding||c.-1214T>A|||||997|,T|intergenic_region|MODIFIER|CQ012201-CQ012202|CQ012201-CQ012202|intergenic_region|CQ012201-CQ012202|||n.64707178A>T||||||
TSW	Cq8B	64707184	Cq8B_64707184	1.34e-07	C	T	upstream_gene_variant,intergenic_region	c.-1220G>A,n.64707184C>T		T|upstream_gene_variant|MODIFIER|CQ012201|CQ012201|transcript|CQ012201-RA|protein_coding||c.-1220G>A|||||1003|,T|intergenic_region|MODIFIER|CQ012201-CQ012202|CQ012201-CQ012202|intergenic_region|CQ012201-CQ012202|||n.64707184C>T||||||
TSW	Cq8B	64712519	Cq8B_64712519	6.47e-08	C	T	downstream_gene_variant,intergenic_region	c.*3357G>A,n.64712519C>T		T|downstream_gene_variant|MODIFIER|CQ012202|CQ012202|transcript|CQ012202-RA|protein_coding||c.*3357G>A|||||2643|,T|intergenic_region|MODIFIER|CQ012201-CQ012202|CQ012201-CQ012202|intergenic_region|CQ012201-CQ012202|||n.64712519C>T||||||
TSW	Cq8B	64716437	Cq8B_64716437	1.98e-07	T	A	intron_variant	c.1054+256A>T		A|intron_variant|MODIFIER|CQ012202|CQ012202|transcript|CQ012202-RA|protein_coding|7/8|c.1054+256A>T||||||
TSW	Cq8B	64717058	Cq8B_64717058	1.72e-07	G	A	intron_variant	c.919-230C>T		A|intron_variant|MODIFIER|CQ012202|CQ012202|transcript|CQ012202-RA|protein_coding|6/8|c.919-230C>T||||||
TSW	Cq8B	64719621	Cq8B_64719621	2.78e-07	T	C	intron_variant	c.448-92A>G		C|intron_variant|MODIFIER|CQ012202|CQ012202|transcript|CQ012202-RA|protein_coding|3/8|c.448-92A>G||||||
TSW	Cq8B	64720041	Cq8B_64720041	9.17e-09	C	G	missense_variant	c.347G>C	p.Arg116Thr	G|missense_variant|MODERATE|CQ012202|CQ012202|transcript|CQ012202-RA|protein_coding|3/9|c.347G>C|p.Arg116Thr|988/2138|347/1095|116/364||
TSW	Cq8B	64720643	Cq8B_64720643	1.06e-07	G	A	intron_variant	c.332-587C>T		A|intron_variant|MODIFIER|CQ012202|CQ012202|transcript|CQ012202-RA|protein_coding|2/8|c.332-587C>T||||||
TSW	Cq8B	64721634	Cq8B_64721634	2.67e-07	G	A	intron_variant	c.331+196C>T		A|intron_variant|MODIFIER|CQ012202|CQ012202|transcript|CQ012202-RA|protein_coding|2/8|c.331+196C>T||||||
TSW	Cq8B	64722964	Cq8B_64722964	1.56e-08	G	C	upstream_gene_variant,intergenic_region	c.-697C>G,n.64722964G>C		C|upstream_gene_variant|MODIFIER|CQ012202|CQ012202|transcript|CQ012202-RA|protein_coding||c.-697C>G|||||56|,C|intergenic_region|MODIFIER|CQ012202-CQ012203|CQ012202-CQ012203|intergenic_region|CQ012202-CQ012203|||n.64722964G>C||||||
TSW	Cq8B	64730547	Cq8B_64730547	5.95e-08	G	A	intergenic_region	n.64730547G>A		A|intergenic_region|MODIFIER|CQ012202-CQ012203|CQ012202-CQ012203|intergenic_region|CQ012202-CQ012203|||n.64730547G>A||||||
TSW	Cq8B	64730760	Cq8B_64730760	1.73e-07	G	A	intergenic_region	n.64730760G>A		A|intergenic_region|MODIFIER|CQ012202-CQ012203|CQ012202-CQ012203|intergenic_region|CQ012202-CQ012203|||n.64730760G>A||||||
TSW	Cq8B	64730761	Cq8B_64730761	1.73e-07	G	A	intergenic_region	n.64730761G>A		A|intergenic_region|MODIFIER|CQ012202-CQ012203|CQ012202-CQ012203|intergenic_region|CQ012202-CQ012203|||n.64730761G>A||||||
TSW	Cq8B	64731741	Cq8B_64731741	7.23e-07	T	C	intergenic_region	n.64731741T>C		C|intergenic_region|MODIFIER|CQ012202-CQ012203|CQ012202-CQ012203|intergenic_region|CQ012202-CQ012203|||n.64731741T>C||||||
TSW	Cq8B	64732211	Cq8B_64732211	2.65e-07	C	T	intergenic_region	n.64732211C>T		T|intergenic_region|MODIFIER|CQ012202-CQ012203|CQ012202-CQ012203|intergenic_region|CQ012202-CQ012203|||n.64732211C>T||||||
TSW	Cq8B	64732550	Cq8B_64732550	9.71e-08	T	A	intergenic_region	n.64732550T>A		A|intergenic_region|MODIFIER|CQ012202-CQ012203|CQ012202-CQ012203|intergenic_region|CQ012202-CQ012203|||n.64732550T>A||||||
TSW	Cq8B	64733677	Cq8B_64733677	3.3e-08	G	A	intergenic_region	n.64733677G>A		A|intergenic_region|MODIFIER|CQ012202-CQ012203|CQ012202-CQ012203|intergenic_region|CQ012202-CQ012203|||n.64733677G>A||||||
TSW	Cq8B	64734113	Cq8B_64734113	8.55e-07	G	T	intergenic_region	n.64734113G>T		T|intergenic_region|MODIFIER|CQ012202-CQ012203|CQ012202-CQ012203|intergenic_region|CQ012202-CQ012203|||n.64734113G>T||||||
TSW	Cq8B	64734186	Cq8B_64734186	5.33e-09	T	C	intergenic_region	n.64734186T>C		C|intergenic_region|MODIFIER|CQ012202-CQ012203|CQ012202-CQ012203|intergenic_region|CQ012202-CQ012203|||n.64734186T>C||||||
TSW	Cq8B	64736447	Cq8B_64736447	4.65e-07	T	C	intergenic_region	n.64736447T>C		C|intergenic_region|MODIFIER|CQ012202-CQ012203|CQ012202-CQ012203|intergenic_region|CQ012202-CQ012203|||n.64736447T>C||||||
TSW	Cq8B	64768162	Cq8B_64768162	6.76e-07	G	A	intergenic_region	n.64768162G>A		A|intergenic_region|MODIFIER|CQ012202-CQ012203|CQ012202-CQ012203|intergenic_region|CQ012202-CQ012203|||n.64768162G>A||||||
TSW	Cq8B	64770308	Cq8B_64770308	6.2e-11	T	C	intergenic_region	n.64770308T>C		C|intergenic_region|MODIFIER|CQ012202-CQ012203|CQ012202-CQ012203|intergenic_region|CQ012202-CQ012203|||n.64770308T>C||||||
TSW	Cq8B	64771523	Cq8B_64771523	6.16e-07	T	G	intergenic_region	n.64771523T>G		G|intergenic_region|MODIFIER|CQ012202-CQ012203|CQ012202-CQ012203|intergenic_region|CQ012202-CQ012203|||n.64771523T>G||||||
TSW	Cq8B	64826970	Cq8B_64826970	4.86e-09	G	A	intergenic_region	n.64826970G>A		A|intergenic_region|MODIFIER|CQ012202-CQ012203|CQ012202-CQ012203|intergenic_region|CQ012202-CQ012203|||n.64826970G>A||||||
TSW	Cq8B	64828935	Cq8B_64828935	6.86e-09	T	C	upstream_gene_variant,intergenic_region	c.-4854T>C,n.64828935T>C		C|upstream_gene_variant|MODIFIER|CQ012203|CQ012203|transcript|CQ012203-RA|protein_coding||c.-4854T>C|||||4515|,C|intergenic_region|MODIFIER|CQ012202-CQ012203|CQ012202-CQ012203|intergenic_region|CQ012202-CQ012203|||n.64828935T>C||||||
TSW	Cq8B	64828954	Cq8B_64828954	2.17e-07	G	A	upstream_gene_variant,intergenic_region	c.-4835G>A,n.64828954G>A		A|upstream_gene_variant|MODIFIER|CQ012203|CQ012203|transcript|CQ012203-RA|protein_coding||c.-4835G>A|||||4496|,A|intergenic_region|MODIFIER|CQ012202-CQ012203|CQ012202-CQ012203|intergenic_region|CQ012202-CQ012203|||n.64828954G>A||||||
TSW	Cq8B	64830331	Cq8B_64830331	2.57e-07	G	A	upstream_gene_variant,intergenic_region	c.-3458G>A,n.64830331G>A		A|upstream_gene_variant|MODIFIER|CQ012203|CQ012203|transcript|CQ012203-RA|protein_coding||c.-3458G>A|||||3119|,A|intergenic_region|MODIFIER|CQ012202-CQ012203|CQ012202-CQ012203|intergenic_region|CQ012202-CQ012203|||n.64830331G>A||||||
TSW	Cq8B	64830471	Cq8B_64830471	1.49e-10	A	T	upstream_gene_variant,intergenic_region	c.-3318A>T,n.64830471A>T		T|upstream_gene_variant|MODIFIER|CQ012203|CQ012203|transcript|CQ012203-RA|protein_coding||c.-3318A>T|||||2979|,T|intergenic_region|MODIFIER|CQ012202-CQ012203|CQ012202-CQ012203|intergenic_region|CQ012202-CQ012203|||n.64830471A>T||||||
TSW	Cq8B	64836614	Cq8B_64836614	3.58e-08	A	T	missense_variant,upstream_gene_variant	c.986A>T,c.-3437A>T	p.Asp329Val,.	T|missense_variant|MODERATE|CQ012203|CQ012203|transcript|CQ012203-RA|protein_coding|5/5|c.986A>T|p.Asp329Val|1325/2190|986/1374|329/457||,T|upstream_gene_variant|MODIFIER|CQ012204|CQ012204|transcript|CQ012204-RA|protein_coding||c.-3437A>T|||||3333|
TSW	Cq8B	64838656	Cq8B_64838656	2.22e-07	T	C	upstream_gene_variant,downstream_gene_variant,intergenic_region	c.-1395T>C,c.*1654T>C,n.64838656T>C		C|upstream_gene_variant|MODIFIER|CQ012204|CQ012204|transcript|CQ012204-RA|protein_coding||c.-1395T>C|||||1291|,C|downstream_gene_variant|MODIFIER|CQ012203|CQ012203|transcript|CQ012203-RA|protein_coding||c.*1654T>C|||||1177|,C|intergenic_region|MODIFIER|CQ012203-CQ012204|CQ012203-CQ012204|intergenic_region|CQ012203-CQ012204|||n.64838656T>C||||||
TSW	Cq8B	64839511	Cq8B_64839511	3.82e-07	C	T	upstream_gene_variant,downstream_gene_variant,intergenic_region	c.-540C>T,c.*2509C>T,n.64839511C>T		T|upstream_gene_variant|MODIFIER|CQ012204|CQ012204|transcript|CQ012204-RA|protein_coding||c.-540C>T|||||436|,T|downstream_gene_variant|MODIFIER|CQ012203|CQ012203|transcript|CQ012203-RA|protein_coding||c.*2509C>T|||||2032|,T|intergenic_region|MODIFIER|CQ012203-CQ012204|CQ012203-CQ012204|intergenic_region|CQ012203-CQ012204|||n.64839511C>T||||||
TSW	Cq8B	64842272	Cq8B_64842272	4.41e-08	G	T	downstream_gene_variant,intron_variant	c.*5270G>T,c.242-1619G>T		T|downstream_gene_variant|MODIFIER|CQ012203|CQ012203|transcript|CQ012203-RA|protein_coding||c.*5270G>T|||||4793|,T|intron_variant|MODIFIER|CQ012204|CQ012204|transcript|CQ012204-RA|protein_coding|3/5|c.242-1619G>T||||||
TSW	Cq8B	64842823	Cq8B_64842823	9.69e-10	A	G	intron_variant	c.242-1068A>G		G|intron_variant|MODIFIER|CQ012204|CQ012204|transcript|CQ012204-RA|protein_coding|3/5|c.242-1068A>G||||||
TSW	Cq8B	64842833	Cq8B_64842833	9.79e-09	G	A	intron_variant	c.242-1058G>A		A|intron_variant|MODIFIER|CQ012204|CQ012204|transcript|CQ012204-RA|protein_coding|3/5|c.242-1058G>A||||||
TSW	Cq8B	64843506	Cq8B_64843506	2.49e-08	G	A	intron_variant	c.242-385G>A		A|intron_variant|MODIFIER|CQ012204|CQ012204|transcript|CQ012204-RA|protein_coding|3/5|c.242-385G>A||||||
TSW	Cq8B	64853028	Cq8B_64853028	9.24e-08	T	C	intergenic_region	n.64853028T>C		C|intergenic_region|MODIFIER|CQ012204-CQ012205|CQ012204-CQ012205|intergenic_region|CQ012204-CQ012205|||n.64853028T>C||||||
TSW	Cq8B	64855729	Cq8B_64855729	8.24e-08	G	A	intergenic_region	n.64855729G>A		A|intergenic_region|MODIFIER|CQ012204-CQ012205|CQ012204-CQ012205|intergenic_region|CQ012204-CQ012205|||n.64855729G>A||||||
TSW	Cq8B	64856373	Cq8B_64856373	5.06e-08	G	T	intergenic_region	n.64856373G>T		T|intergenic_region|MODIFIER|CQ012204-CQ012205|CQ012204-CQ012205|intergenic_region|CQ012204-CQ012205|||n.64856373G>T||||||
TSW	Cq8B	64856919	Cq8B_64856919	5.03e-08	T	C	intergenic_region	n.64856919T>C		C|intergenic_region|MODIFIER|CQ012204-CQ012205|CQ012204-CQ012205|intergenic_region|CQ012204-CQ012205|||n.64856919T>C||||||
TSW	Cq8B	64857269	Cq8B_64857269	2.23e-07	A	G	intergenic_region	n.64857269A>G		G|intergenic_region|MODIFIER|CQ012204-CQ012205|CQ012204-CQ012205|intergenic_region|CQ012204-CQ012205|||n.64857269A>G||||||
TSW	Cq8B	64859774	Cq8B_64859774	2.54e-07	A	T	downstream_gene_variant,downstream_gene_variant,intergenic_region	c.*3556T>A,c.*4678T>A,n.64859774A>T		T|downstream_gene_variant|MODIFIER|CQ012205|CQ012205|transcript|CQ012205-RA|protein_coding||c.*3556T>A|||||3556|WARNING_TRANSCRIPT_MULTIPLE_STOP_CODONS,T|downstream_gene_variant|MODIFIER|CQ012206|CQ012206|transcript|CQ012206-RA|protein_coding||c.*4678T>A|||||4678|,T|intergenic_region|MODIFIER|CQ012204-CQ012205|CQ012204-CQ012205|intergenic_region|CQ012204-CQ012205|||n.64859774A>T||||||
TSW	Cq8B	64910004	Cq8B_64910004	3.81e-07	G	A	intergenic_region	n.64910004G>A		A|intergenic_region|MODIFIER|CQ012208-CQ012209|CQ012208-CQ012209|intergenic_region|CQ012208-CQ012209|||n.64910004G>A||||||
TSW	Cq8B	64910554	Cq8B_64910554	8.31e-07	T	C	intergenic_region	n.64910554T>C		C|intergenic_region|MODIFIER|CQ012208-CQ012209|CQ012208-CQ012209|intergenic_region|CQ012208-CQ012209|||n.64910554T>C||||||
TSW	Cq8B	64910647	Cq8B_64910647	1.99e-08	T	G	intergenic_region	n.64910647T>G		G|intergenic_region|MODIFIER|CQ012208-CQ012209|CQ012208-CQ012209|intergenic_region|CQ012208-CQ012209|||n.64910647T>G||||||
TSW	Cq8B	64914262	Cq8B_64914262	8.88e-09	A	G	intergenic_region	n.64914262A>G		G|intergenic_region|MODIFIER|CQ012208-CQ012209|CQ012208-CQ012209|intergenic_region|CQ012208-CQ012209|||n.64914262A>G||||||
TSW	Cq8B	65003170	Cq8B_65003170	9.5e-09	G	A	downstream_gene_variant,intergenic_region	c.*1762C>T,n.65003170G>A		A|downstream_gene_variant|MODIFIER|CQ012215|CQ012215|transcript|CQ012215-RA|protein_coding||c.*1762C>T|||||1762|,A|intergenic_region|MODIFIER|CQ012214-CQ012215|CQ012214-CQ012215|intergenic_region|CQ012214-CQ012215|||n.65003170G>A||||||
TSW	Cq8B	65529068	Cq8B_65529068	1.33e-08	A	G	intergenic_region	n.65529068A>G		G|intergenic_region|MODIFIER|CQ012251-CQ012252|CQ012251-CQ012252|intergenic_region|CQ012251-CQ012252|||n.65529068A>G||||||
TSW	Cq8B	65762092	Cq8B_65762092	3.29e-08	T	C	upstream_gene_variant,intergenic_region	c.-2239A>G,n.65762092T>C		C|upstream_gene_variant|MODIFIER|CQ012268|CQ012268|transcript|CQ012268-RA|protein_coding||c.-2239A>G|||||2239|,C|intergenic_region|MODIFIER|CQ012268-CQ012269|CQ012268-CQ012269|intergenic_region|CQ012268-CQ012269|||n.65762092T>C||||||
TSW	Cq8B	65875036	Cq8B_65875036	3.04e-07	T	C	downstream_gene_variant,intron_variant	c.*723A>G,c.228+247A>G		C|downstream_gene_variant|MODIFIER|CQ012276|CQ012276|transcript|CQ012276-RA|protein_coding||c.*723A>G|||||723|,C|intron_variant|MODIFIER|CQ012275|CQ012275|transcript|CQ012275-RA|protein_coding|1/5|c.228+247A>G||||||
TSW	Cq8B	66079672	Cq8B_66079672	8.35e-07	T	C	downstream_gene_variant,intergenic_region	c.*1481A>G,n.66079672T>C		C|downstream_gene_variant|MODIFIER|CQ012284|CQ012284|transcript|CQ012284-RA|protein_coding||c.*1481A>G|||||1481|,C|intergenic_region|MODIFIER|CQ012283-CQ012284|CQ012283-CQ012284|intergenic_region|CQ012283-CQ012284|||n.66079672T>C||||||
TSW	Cq8B	66142115	Cq8B_66142115	5.82e-08	C	G	intergenic_region	n.66142115C>G		G|intergenic_region|MODIFIER|CQ012289-CQ012290|CQ012289-CQ012290|intergenic_region|CQ012289-CQ012290|||n.66142115C>G||||||
TSW	Cq8B	66339311	Cq8B_66339311	2.09e-07	A	C	downstream_gene_variant,intron_variant	c.*5158A>C,c.313-44T>G		C|downstream_gene_variant|MODIFIER|CQ012301|CQ012301|transcript|CQ012301-RA|protein_coding||c.*5158A>C|||||4311|,C|intron_variant|MODIFIER|CQ012302|CQ012302|transcript|CQ012302-RA|protein_coding|5/8|c.313-44T>G||||||
PC1	Cq1A	12618594	Cq1A_12618594	4.24e-07	T	G	intergenic_region	n.12618594T>G		G|intergenic_region|MODIFIER|CQ048175-CQ048176|CQ048175-CQ048176|intergenic_region|CQ048175-CQ048176|||n.12618594T>G||||||
PC1	Cq2A	3270633	Cq2A_3270633	7.68e-10	A	G	intron_variant	c.5+6834T>C		G|intron_variant|MODIFIER|CQ053052|CQ053052|transcript|CQ053052-RA|protein_coding|1/2|c.5+6834T>C||||||
PC1	Cq2A	3273457	Cq2A_3273457	5.42e-07	T	C	intron_variant	c.5+4010A>G		C|intron_variant|MODIFIER|CQ053052|CQ053052|transcript|CQ053052-RA|protein_coding|1/2|c.5+4010A>G||||||
PC1	Cq2A	3631123	Cq2A_3631123	6.59e-07	G	T	intergenic_region	n.3631123G>T		T|intergenic_region|MODIFIER|CQ053083-CQ053084|CQ053083-CQ053084|intergenic_region|CQ053083-CQ053084|||n.3631123G>T||||||
PC1	Cq2A	3642085	Cq2A_3642085	2.62e-07	T	A	intron_variant	c.2862+546A>T		A|intron_variant|MODIFIER|CQ053084|CQ053084|transcript|CQ053084-RA|protein_coding|13/15|c.2862+546A>T||||||
PC1	Cq2A	3650602	Cq2A_3650602	6.29e-07	G	T	intron_variant	c.684+239C>A		T|intron_variant|MODIFIER|CQ053084|CQ053084|transcript|CQ053084-RA|protein_coding|4/15|c.684+239C>A||||||
PC1	Cq2A	3654518	Cq2A_3654518	5.48e-07	G	A	upstream_gene_variant	MODIFIER	MODIFIER	c.-4635G>A
PC1	Cq2A	3700170	Cq2A_3700170	4.79e-07	T	A	intergenic_region	n.3700170T>A		A|intergenic_region|MODIFIER|CQ053086-CQ053087|CQ053086-CQ053087|intergenic_region|CQ053086-CQ053087|||n.3700170T>A||||||
PC1	Cq2A	3705877	Cq2A_3705877	8.55e-07	C	T	intergenic_region	n.3705877C>T		T|intergenic_region|MODIFIER|CQ053086-CQ053087|CQ053086-CQ053087|intergenic_region|CQ053086-CQ053087|||n.3705877C>T||||||
PC1	Cq2A	3731693	Cq2A_3731693	5.49e-07	A	G	upstream_gene_variant	intron_variant	MODIFIER	MODIFIER
PC1	Cq2A	3840277	Cq2A_3840277	7.55e-07	G	A	5_prime_UTR_variant	c.-440C>T		A|5_prime_UTR_variant|MODIFIER|CQ053097|CQ053097|transcript|CQ053097-RA|protein_coding|1/2|c.-440C>T|||||440|
PC1	Cq2A	4179125	Cq2A_4179125	9.16e-07	A	C	upstream_gene_variant	intergenic_region	MODIFIER	MODIFIER
PC1	Cq2A	4242017	Cq2A_4242017	3.67e-11	C	T	synonymous_variant	c.1761G>A	p.Gln587Gln	T|synonymous_variant|LOW|CQ053133|CQ053133|transcript|CQ053133-RA|protein_coding|3/3|c.1761G>A|p.Gln587Gln|2790/3517|1761/1929|587/642||
PC1	Cq2A	4406829	Cq2A_4406829	3.19e-11	G	C	upstream_gene_variant	MODIFIER	MODIFIER	c.-5099C>G
PC1	Cq2A	5651931	Cq2A_5651931	9.03e-08	T	C	intergenic_region	n.5651931T>C		C|intergenic_region|MODIFIER|CQ053254-CQ053256|CQ053254-CQ053256|intergenic_region|CQ053254-CQ053256|||n.5651931T>C||||||
PC1	Cq2A	5760278	Cq2A_5760278	5.38e-07	C	T	intergenic_region	n.5760278C>T		T|intergenic_region|MODIFIER|CQ053263-CQ053264|CQ053263-CQ053264|intergenic_region|CQ053263-CQ053264|||n.5760278C>T||||||
PC1	Cq2A	6753998	Cq2A_6753998	3.85e-07	G	A	intergenic_region	n.6753998G>A		A|intergenic_region|MODIFIER|CQ053330-CQ053331|CQ053330-CQ053331|intergenic_region|CQ053330-CQ053331|||n.6753998G>A||||||
PC1	Cq2A	6754010	Cq2A_6754010	7.29e-07	C	G	intergenic_region	n.6754010C>G		G|intergenic_region|MODIFIER|CQ053330-CQ053331|CQ053330-CQ053331|intergenic_region|CQ053330-CQ053331|||n.6754010C>G||||||
PC1	Cq2A	6786454	Cq2A_6786454	1.86e-07	C	T	downstream_gene_variant	MODIFIER	MODIFIER	c.*9586C>T
PC1	Cq2A	6793510	Cq2A_6793510	7.77e-07	G	A	upstream_gene_variant	intergenic_region	MODIFIER	MODIFIER
PC1	Cq2A	6794034	Cq2A_6794034	2.12e-09	C	T	upstream_gene_variant	intergenic_region	MODIFIER	MODIFIER
PC1	Cq2A	6851439	Cq2A_6851439	6.63e-07	G	A	upstream_gene_variant	MODIFIER	MODIFIER	c.-2989C>T
PC1	Cq2A	6851440	Cq2A_6851440	6.63e-07	T	A	upstream_gene_variant	MODIFIER	MODIFIER	c.-2990A>T
PC1	Cq2A	6851616	Cq2A_6851616	3.85e-07	A	T	upstream_gene_variant	MODIFIER	MODIFIER	c.-3166T>A
PC1	Cq2A	6854626	Cq2A_6854626	7.97e-07	A	C	intergenic_region	n.6854626A>C		C|intergenic_region|MODIFIER|CQ053341-CQ053342|CQ053341-CQ053342|intergenic_region|CQ053341-CQ053342|||n.6854626A>C||||||
PC1	Cq2A	6862369	Cq2A_6862369	2.16e-07	G	A	intergenic_region	n.6862369G>A		A|intergenic_region|MODIFIER|CQ053341-CQ053342|CQ053341-CQ053342|intergenic_region|CQ053341-CQ053342|||n.6862369G>A||||||
PC1	Cq2A	6862511	Cq2A_6862511	1.89e-08	A	T	intergenic_region	n.6862511A>T		T|intergenic_region|MODIFIER|CQ053341-CQ053342|CQ053341-CQ053342|intergenic_region|CQ053341-CQ053342|||n.6862511A>T||||||
PC1	Cq2A	6864907	Cq2A_6864907	8.54e-08	G	A	downstream_gene_variant	MODIFIER	MODIFIER	c.*6809C>T
PC1	Cq2A	6872063	Cq2A_6872063	6.4e-07	G	T	intron_variant	c.190-279C>A		T|intron_variant|MODIFIER|CQ053342|CQ053342|transcript|CQ053342-RA|protein_coding|2/3|c.190-279C>A||||||WARNING_TRANSCRIPT_NO_START_CODON
PC1	Cq2A	6872335	Cq2A_6872335	5.62e-09	A	T	intron_variant	c.189+446T>A		T|intron_variant|MODIFIER|CQ053342|CQ053342|transcript|CQ053342-RA|protein_coding|2/3|c.189+446T>A||||||WARNING_TRANSCRIPT_NO_START_CODON
PC1	Cq2A	6876410	Cq2A_6876410	5.78e-07	G	T	upstream_gene_variant	MODIFIER	MODIFIER	c.-3337C>A
PC1	Cq2A	6878191	Cq2A_6878191	3.59e-07	A	C	intergenic_region	n.6878191A>C		C|intergenic_region|MODIFIER|CQ053342-CQ053343|CQ053342-CQ053343|intergenic_region|CQ053342-CQ053343|||n.6878191A>C||||||
PC1	Cq2A	6879078	Cq2A_6879078	1.17e-07	A	G	intergenic_region	n.6879078A>G		G|intergenic_region|MODIFIER|CQ053342-CQ053343|CQ053342-CQ053343|intergenic_region|CQ053342-CQ053343|||n.6879078A>G||||||
PC1	Cq2A	6882028	Cq2A_6882028	3.05e-07	C	A	intergenic_region	n.6882028C>A		A|intergenic_region|MODIFIER|CQ053342-CQ053343|CQ053342-CQ053343|intergenic_region|CQ053342-CQ053343|||n.6882028C>A||||||
PC1	Cq2A	6886645	Cq2A_6886645	2.34e-07	C	A	intergenic_region	n.6886645C>A		A|intergenic_region|MODIFIER|CQ053342-CQ053343|CQ053342-CQ053343|intergenic_region|CQ053342-CQ053343|||n.6886645C>A||||||
PC1	Cq2A	6941626	Cq2A_6941626	8.52e-07	C	T	upstream_gene_variant	MODIFIER	MODIFIER	c.-3818C>T
PC1	Cq2A	6942068	Cq2A_6942068	6.72e-07	G	A	upstream_gene_variant	MODIFIER	MODIFIER	c.-3376G>A
PC1	Cq2A	6961685	Cq2A_6961685	6.99e-08	C	T	intergenic_region	n.6961685C>T		T|intergenic_region|MODIFIER|CQ053344-CQ053345|CQ053344-CQ053345|intergenic_region|CQ053344-CQ053345|||n.6961685C>T||||||
PC1	Cq2A	6962129	Cq2A_6962129	1.32e-07	C	T	intergenic_region	n.6962129C>T		T|intergenic_region|MODIFIER|CQ053344-CQ053345|CQ053344-CQ053345|intergenic_region|CQ053344-CQ053345|||n.6962129C>T||||||
PC1	Cq2A	6973369	Cq2A_6973369	4.64e-07	G	A	upstream_gene_variant	MODIFIER	MODIFIER	c.-1444G>A
PC1	Cq2A	6974314	Cq2A_6974314	3.34e-08	G	A	upstream_gene_variant	MODIFIER	MODIFIER	c.-499G>A
PC1	Cq2A	6988555	Cq2A_6988555	1.96e-07	G	T	downstream_gene_variant	MODIFIER	MODIFIER	c.*2060C>A
PC1	Cq2A	6992663	Cq2A_6992663	1.15e-07	T	C	5_prime_UTR_premature_start_codon_gain_variant	LOW	MODIFIER	c.-33A>G
PC1	Cq2A	7005292	Cq2A_7005292	4.01e-07	C	T	intergenic_region	n.7005292C>T		T|intergenic_region|MODIFIER|CQ053346-CQ053347|CQ053346-CQ053347|intergenic_region|CQ053346-CQ053347|||n.7005292C>T||||||
PC1	Cq2A	7006103	Cq2A_7006103	4.26e-07	A	G	intergenic_region	n.7006103A>G		G|intergenic_region|MODIFIER|CQ053346-CQ053347|CQ053346-CQ053347|intergenic_region|CQ053346-CQ053347|||n.7006103A>G||||||
PC1	Cq2A	7010882	Cq2A_7010882	8.35e-07	A	T	intergenic_region	n.7010882A>T		T|intergenic_region|MODIFIER|CQ053346-CQ053347|CQ053346-CQ053347|intergenic_region|CQ053346-CQ053347|||n.7010882A>T||||||
PC1	Cq2A	7013897	Cq2A_7013897	4.41e-07	C	G	intergenic_region	n.7013897C>G		G|intergenic_region|MODIFIER|CQ053346-CQ053347|CQ053346-CQ053347|intergenic_region|CQ053346-CQ053347|||n.7013897C>G||||||
PC1	Cq2A	7013936	Cq2A_7013936	7.07e-08	G	T	intergenic_region	n.7013936G>T		T|intergenic_region|MODIFIER|CQ053346-CQ053347|CQ053346-CQ053347|intergenic_region|CQ053346-CQ053347|||n.7013936G>T||||||
PC1	Cq2A	7016172	Cq2A_7016172	7.36e-07	G	T	intergenic_region	n.7016172G>T		T|intergenic_region|MODIFIER|CQ053346-CQ053347|CQ053346-CQ053347|intergenic_region|CQ053346-CQ053347|||n.7016172G>T||||||
PC1	Cq2A	7016184	Cq2A_7016184	7.31e-07	G	A	intergenic_region	n.7016184G>A		A|intergenic_region|MODIFIER|CQ053346-CQ053347|CQ053346-CQ053347|intergenic_region|CQ053346-CQ053347|||n.7016184G>A||||||
PC1	Cq2A	7030321	Cq2A_7030321	3.61e-08	C	A	intergenic_region	n.7030321C>A		A|intergenic_region|MODIFIER|CQ053346-CQ053347|CQ053346-CQ053347|intergenic_region|CQ053346-CQ053347|||n.7030321C>A||||||
PC1	Cq2A	7030354	Cq2A_7030354	3.96e-07	C	T	intergenic_region	n.7030354C>T		T|intergenic_region|MODIFIER|CQ053346-CQ053347|CQ053346-CQ053347|intergenic_region|CQ053346-CQ053347|||n.7030354C>T||||||
PC1	Cq2A	7032236	Cq2A_7032236	6.45e-07	T	A	intergenic_region	n.7032236T>A		A|intergenic_region|MODIFIER|CQ053346-CQ053347|CQ053346-CQ053347|intergenic_region|CQ053346-CQ053347|||n.7032236T>A||||||
PC1	Cq2A	7040638	Cq2A_7040638	3.58e-08	A	G	intergenic_region	n.7040638A>G		G|intergenic_region|MODIFIER|CQ053346-CQ053347|CQ053346-CQ053347|intergenic_region|CQ053346-CQ053347|||n.7040638A>G||||||
PC1	Cq2A	7055388	Cq2A_7055388	7.81e-07	C	T	upstream_gene_variant	MODIFIER	MODIFIER	c.-4996C>T
PC1	Cq2A	7060168	Cq2A_7060168	4.96e-07	G	A	upstream_gene_variant	MODIFIER	MODIFIER	c.-216G>A
PC1	Cq2A	7060403	Cq2A_7060403	1.44e-08	T	C	missense_variant	c.20T>C	p.Val7Ala	C|missense_variant|MODERATE|CQ053348|CQ053348|transcript|CQ053348-RA|protein_coding|1/2|c.20T>C|p.Val7Ala|20/357|20/357|7/118||
PC1	Cq2A	7066557	Cq2A_7066557	7.94e-07	C	T	intergenic_region	n.7066557C>T		T|intergenic_region|MODIFIER|CQ053348-CQ053349|CQ053348-CQ053349|intergenic_region|CQ053348-CQ053349|||n.7066557C>T||||||
PC1	Cq2A	7093949	Cq2A_7093949	1.01e-07	G	A	upstream_gene_variant	downstream_gene_variant	downstream_gene_variant	intergenic_region
PC1	Cq2A	7098628	Cq2A_7098628	2.33e-07	C	T	upstream_gene_variant	intron_variant	MODIFIER	MODIFIER
PC1	Cq2A	7098706	Cq2A_7098706	4.06e-07	A	G	upstream_gene_variant	intron_variant	MODIFIER	MODIFIER
PC1	Cq2A	7099741	Cq2A_7099741	2.38e-07	C	G	upstream_gene_variant	intergenic_region	MODIFIER	MODIFIER
PC1	Cq2A	7105111	Cq2A_7105111	9.95e-09	A	T	upstream_gene_variant	MODIFIER	MODIFIER	c.-1484T>A
PC1	Cq2A	7122834	Cq2A_7122834	1.08e-07	G	T	intergenic_region	n.7122834G>T		T|intergenic_region|MODIFIER|CQ053353-CQ053354|CQ053353-CQ053354|intergenic_region|CQ053353-CQ053354|||n.7122834G>T||||||
PC1	Cq2A	7126963	Cq2A_7126963	2.7e-07	T	G	intergenic_region	n.7126963T>G		G|intergenic_region|MODIFIER|CQ053353-CQ053354|CQ053353-CQ053354|intergenic_region|CQ053353-CQ053354|||n.7126963T>G||||||
PC1	Cq2A	7127355	Cq2A_7127355	3.81e-07	A	G	intergenic_region	n.7127355A>G		G|intergenic_region|MODIFIER|CQ053353-CQ053354|CQ053353-CQ053354|intergenic_region|CQ053353-CQ053354|||n.7127355A>G||||||
PC1	Cq2A	7143140	Cq2A_7143140	1.79e-07	C	A	downstream_gene_variant	MODIFIER	MODIFIER	c.*4467C>A
PC1	Cq2A	7144225	Cq2A_7144225	5.45e-07	C	G	intergenic_region	n.7144225C>G		G|intergenic_region|MODIFIER|CQ053354-CQ053355|CQ053354-CQ053355|intergenic_region|CQ053354-CQ053355|||n.7144225C>G||||||
PC1	Cq2A	7163401	Cq2A_7163401	3.34e-08	C	T	intergenic_region	n.7163401C>T		T|intergenic_region|MODIFIER|CQ053354-CQ053355|CQ053354-CQ053355|intergenic_region|CQ053354-CQ053355|||n.7163401C>T||||||
PC1	Cq2A	7164181	Cq2A_7164181	1.21e-09	T	C	intergenic_region	n.7164181T>C		C|intergenic_region|MODIFIER|CQ053354-CQ053355|CQ053354-CQ053355|intergenic_region|CQ053354-CQ053355|||n.7164181T>C||||||
PC1	Cq2A	7167115	Cq2A_7167115	2.18e-08	C	T	intergenic_region	n.7167115C>T		T|intergenic_region|MODIFIER|CQ053354-CQ053355|CQ053354-CQ053355|intergenic_region|CQ053354-CQ053355|||n.7167115C>T||||||
PC1	Cq2A	7169354	Cq2A_7169354	2.73e-07	T	C	upstream_gene_variant	downstream_gene_variant	intergenic_region	MODIFIER
PC1	Cq2A	7173793	Cq2A_7173793	3.1e-08	C	T	upstream_gene_variant	intron_variant	MODIFIER	MODIFIER
PC1	Cq2A	7177862	Cq2A_7177862	7.37e-08	G	A	upstream_gene_variant	intergenic_region	MODIFIER	MODIFIER
PC1	Cq2A	7192244	Cq2A_7192244	3.97e-07	T	C	upstream_gene_variant	intergenic_region	MODIFIER	MODIFIER
PC1	Cq2A	7198898	Cq2A_7198898	1.05e-07	C	A	upstream_gene_variant	intron_variant	MODIFIER	MODIFIER
PC1	Cq2A	7198999	Cq2A_7198999	1.09e-07	G	A	upstream_gene_variant	intron_variant	MODIFIER	MODIFIER
PC1	Cq2A	7286123	Cq2A_7286123	1.91e-07	C	A	downstream_gene_variant	intergenic_region	MODIFIER	MODIFIER
PC1	Cq2A	7286176	Cq2A_7286176	4.47e-08	T	A	downstream_gene_variant	intergenic_region	MODIFIER	MODIFIER
PC1	Cq2A	7289213	Cq2A_7289213	6.49e-07	A	T	missense_variant	MODERATE	MODIFIER	c.234T>A
PC1	Cq2A	7323600	Cq2A_7323600	1.2e-07	A	G	downstream_gene_variant	intergenic_region	MODIFIER	MODIFIER
PC1	Cq2A	7357372	Cq2A_7357372	5.15e-07	G	T	intron_variant	c.181-1455C>A		T|intron_variant|MODIFIER|CQ053378|CQ053378|transcript|CQ053378-RA|protein_coding|2/4|c.181-1455C>A||||||
PC1	Cq2A	7362204	Cq2A_7362204	2.76e-09	T	C	upstream_gene_variant	MODIFIER	MODIFIER	c.-1969A>G
PC1	Cq2A	7380626	Cq2A_7380626	5.45e-08	G	A	intergenic_region	n.7380626G>A		A|intergenic_region|MODIFIER|CQ053378-CQ053379|CQ053378-CQ053379|intergenic_region|CQ053378-CQ053379|||n.7380626G>A||||||
PC1	Cq2A	7383072	Cq2A_7383072	4.35e-08	T	C	intergenic_region	n.7383072T>C		C|intergenic_region|MODIFIER|CQ053378-CQ053379|CQ053378-CQ053379|intergenic_region|CQ053378-CQ053379|||n.7383072T>C||||||
PC1	Cq2A	7384707	Cq2A_7384707	3.52e-07	A	G	intergenic_region	n.7384707A>G		G|intergenic_region|MODIFIER|CQ053378-CQ053379|CQ053378-CQ053379|intergenic_region|CQ053378-CQ053379|||n.7384707A>G||||||
PC1	Cq2A	7394829	Cq2A_7394829	1.25e-07	C	T	downstream_gene_variant	MODIFIER	MODIFIER	c.*3720G>A
PC1	Cq2A	7395499	Cq2A_7395499	8.81e-07	A	G	downstream_gene_variant	MODIFIER	MODIFIER	c.*3050T>C
PC1	Cq2A	7396046	Cq2A_7396046	1.7e-07	T	G	downstream_gene_variant	MODIFIER	MODIFIER	c.*2503A>C
PC1	Cq2A	7397099	Cq2A_7397099	1e-08	A	G	downstream_gene_variant	MODIFIER	MODIFIER	c.*1450T>C
PC1	Cq2A	7422950	Cq2A_7422950	9.14e-07	G	C	downstream_gene_variant	MODIFIER	MODIFIER	c.*2268C>G
PC1	Cq2A	7425916	Cq2A_7425916	7.39e-08	C	T	intron_variant	c.1267-447G>A		T|intron_variant|MODIFIER|CQ053382|CQ053382|transcript|CQ053382-RA|protein_coding|8/9|c.1267-447G>A||||||
PC1	Cq2A	7432666	Cq2A_7432666	7.8e-07	C	G	upstream_gene_variant	intergenic_region	MODIFIER	MODIFIER
PC1	Cq2A	7449626	Cq2A_7449626	4.07e-07	C	G	upstream_gene_variant	MODIFIER	MODIFIER	c.-2878C>G
PC1	Cq2A	7449964	Cq2A_7449964	2.24e-09	A	G	upstream_gene_variant	MODIFIER	MODIFIER	c.-2540A>G
PC1	Cq2A	7468564	Cq2A_7468564	2.37e-09	C	A	downstream_gene_variant	intergenic_region	MODIFIER	MODIFIER
PC1	Cq2A	7485136	Cq2A_7485136	1.58e-08	C	T	intron_variant	c.268+403C>T		T|intron_variant|MODIFIER|CQ053386|CQ053386|transcript|CQ053386-RA|protein_coding|5/5|c.268+403C>T||||||
PC1	Cq2A	7499269	Cq2A_7499269	4.2e-07	T	C	missense_variant	MODERATE	MODIFIER	c.1409T>C
PC1	Cq2A	7510015	Cq2A_7510015	3.33e-09	G	A	upstream_gene_variant	intron_variant	MODIFIER	MODIFIER
PC1	Cq2A	7510216	Cq2A_7510216	2.87e-09	A	G	downstream_gene_variant	MODIFIER	MODIFIER	c.*2775T>C
PC1	Cq2A	7510350	Cq2A_7510350	5.46e-07	G	T	downstream_gene_variant	MODIFIER	MODIFIER	c.*2641C>A
PC1	Cq2A	7514348	Cq2A_7514348	1.95e-07	T	C	synonymous_variant	LOW	MODIFIER	c.468A>G
PC1	Cq2A	7515241	Cq2A_7515241	2.92e-07	G	C	downstream_gene_variant	MODIFIER	MODIFIER	c.*3882G>C
PC1	Cq2A	7522965	Cq2A_7522965	1.48e-07	C	G	upstream_gene_variant	MODIFIER	MODIFIER	c.-3624G>C
PC1	Cq2A	7523047	Cq2A_7523047	2.08e-08	G	A	upstream_gene_variant	MODIFIER	MODIFIER	c.-3706C>T
PC1	Cq2A	7523051	Cq2A_7523051	7.43e-07	A	G	upstream_gene_variant	MODIFIER	MODIFIER	c.-3710T>C
PC1	Cq2A	7523281	Cq2A_7523281	5.49e-08	T	C	upstream_gene_variant	MODIFIER	MODIFIER	c.-3940A>G
PC1	Cq2A	7523592	Cq2A_7523592	6e-09	G	T	upstream_gene_variant	MODIFIER	MODIFIER	c.-4251C>A
PC1	Cq2A	7524044	Cq2A_7524044	1.05e-07	T	C	upstream_gene_variant	MODIFIER	MODIFIER	c.-4703A>G
PC1	Cq2A	7524409	Cq2A_7524409	2.43e-09	G	C	upstream_gene_variant	MODIFIER	MODIFIER	c.-5068C>G
PC1	Cq2A	7525598	Cq2A_7525598	1.77e-10	G	A	intergenic_region	n.7525598G>A		A|intergenic_region|MODIFIER|CQ053390-CQ053391|CQ053390-CQ053391|intergenic_region|CQ053390-CQ053391|||n.7525598G>A||||||
PC1	Cq2A	7530144	Cq2A_7530144	1.31e-07	C	A	intergenic_region	n.7530144C>A		A|intergenic_region|MODIFIER|CQ053390-CQ053391|CQ053390-CQ053391|intergenic_region|CQ053390-CQ053391|||n.7530144C>A||||||
PC1	Cq2A	7530281	Cq2A_7530281	3.81e-07	T	C	intergenic_region	n.7530281T>C		C|intergenic_region|MODIFIER|CQ053390-CQ053391|CQ053390-CQ053391|intergenic_region|CQ053390-CQ053391|||n.7530281T>C||||||
PC1	Cq2A	7536436	Cq2A_7536436	2.4e-07	C	T	missense_variant	c.107C>T	p.Ser36Phe	T|missense_variant|MODERATE|CQ053391|CQ053391|transcript|CQ053391-RA|protein_coding|1/1|c.107C>T|p.Ser36Phe|107/411|107/411|36/136||
PC1	Cq2A	7537774	Cq2A_7537774	2.17e-07	A	C	downstream_gene_variant	MODIFIER	MODIFIER	c.*1034A>C
PC1	Cq2A	7558196	Cq2A_7558196	1.26e-07	T	C	intergenic_region	n.7558196T>C		C|intergenic_region|MODIFIER|CQ053391-CQ053392|CQ053391-CQ053392|intergenic_region|CQ053391-CQ053392|||n.7558196T>C||||||
PC1	Cq2A	7572066	Cq2A_7572066	7.75e-07	A	T	downstream_gene_variant	MODIFIER	MODIFIER	c.*2091T>A
PC1	Cq2A	7584887	Cq2A_7584887	2.75e-07	C	T	intron_variant	c.881-808G>A		T|intron_variant|MODIFIER|CQ053392|CQ053392|transcript|CQ053392-RA|protein_coding|8/24|c.881-808G>A||||||
PC1	Cq2A	7594264	Cq2A_7594264	8.73e-08	A	G	upstream_gene_variant	MODIFIER	MODIFIER	c.-3140T>C
PC1	Cq2A	7595645	Cq2A_7595645	6.84e-07	A	G	upstream_gene_variant	MODIFIER	MODIFIER	c.-4521T>C
PC1	Cq2A	7616222	Cq2A_7616222	6.97e-08	C	A	intergenic_region	n.7616222C>A		A|intergenic_region|MODIFIER|CQ053393-CQ053394|CQ053393-CQ053394|intergenic_region|CQ053393-CQ053394|||n.7616222C>A||||||
PC1	Cq2A	7616233	Cq2A_7616233	1.02e-08	T	G	intergenic_region	n.7616233T>G		G|intergenic_region|MODIFIER|CQ053393-CQ053394|CQ053393-CQ053394|intergenic_region|CQ053393-CQ053394|||n.7616233T>G||||||
PC1	Cq2A	7616292	Cq2A_7616292	1.25e-08	T	C	intergenic_region	n.7616292T>C		C|intergenic_region|MODIFIER|CQ053393-CQ053394|CQ053393-CQ053394|intergenic_region|CQ053393-CQ053394|||n.7616292T>C||||||
PC1	Cq2A	7641337	Cq2A_7641337	7.73e-09	A	G	intergenic_region	n.7641337A>G		G|intergenic_region|MODIFIER|CQ053394-CQ053395|CQ053394-CQ053395|intergenic_region|CQ053394-CQ053395|||n.7641337A>G||||||
PC1	Cq2A	7644519	Cq2A_7644519	6.26e-07	C	T	intergenic_region	n.7644519C>T		T|intergenic_region|MODIFIER|CQ053394-CQ053395|CQ053394-CQ053395|intergenic_region|CQ053394-CQ053395|||n.7644519C>T||||||
PC1	Cq2A	7646708	Cq2A_7646708	3.67e-08	A	G	intergenic_region	n.7646708A>G		G|intergenic_region|MODIFIER|CQ053394-CQ053395|CQ053394-CQ053395|intergenic_region|CQ053394-CQ053395|||n.7646708A>G||||||
PC1	Cq2A	7649289	Cq2A_7649289	1.68e-07	C	T	intergenic_region	n.7649289C>T		T|intergenic_region|MODIFIER|CQ053394-CQ053395|CQ053394-CQ053395|intergenic_region|CQ053394-CQ053395|||n.7649289C>T||||||
PC1	Cq2A	7654334	Cq2A_7654334	9.83e-09	T	C	intergenic_region	n.7654334T>C		C|intergenic_region|MODIFIER|CQ053394-CQ053395|CQ053394-CQ053395|intergenic_region|CQ053394-CQ053395|||n.7654334T>C||||||
PC1	Cq2A	7658051	Cq2A_7658051	3.75e-07	T	C	intergenic_region	n.7658051T>C		C|intergenic_region|MODIFIER|CQ053394-CQ053395|CQ053394-CQ053395|intergenic_region|CQ053394-CQ053395|||n.7658051T>C||||||
PC1	Cq2A	7682734	Cq2A_7682734	8.3e-08	A	G	intergenic_region	n.7682734A>G		G|intergenic_region|MODIFIER|CQ053394-CQ053395|CQ053394-CQ053395|intergenic_region|CQ053394-CQ053395|||n.7682734A>G||||||
PC1	Cq2A	7689768	Cq2A_7689768	3.79e-07	A	G	intergenic_region	n.7689768A>G		G|intergenic_region|MODIFIER|CQ053394-CQ053395|CQ053394-CQ053395|intergenic_region|CQ053394-CQ053395|||n.7689768A>G||||||
PC1	Cq2A	7693518	Cq2A_7693518	4.72e-08	T	C	intergenic_region	n.7693518T>C		C|intergenic_region|MODIFIER|CQ053394-CQ053395|CQ053394-CQ053395|intergenic_region|CQ053394-CQ053395|||n.7693518T>C||||||
PC1	Cq2A	7696937	Cq2A_7696937	3.41e-08	G	C	intergenic_region	n.7696937G>C		C|intergenic_region|MODIFIER|CQ053394-CQ053395|CQ053394-CQ053395|intergenic_region|CQ053394-CQ053395|||n.7696937G>C||||||
PC1	Cq2A	7700452	Cq2A_7700452	2.6e-07	A	T	intergenic_region	n.7700452A>T		T|intergenic_region|MODIFIER|CQ053394-CQ053395|CQ053394-CQ053395|intergenic_region|CQ053394-CQ053395|||n.7700452A>T||||||
PC1	Cq2A	7707152	Cq2A_7707152	6.61e-07	A	G	intergenic_region	n.7707152A>G		G|intergenic_region|MODIFIER|CQ053394-CQ053395|CQ053394-CQ053395|intergenic_region|CQ053394-CQ053395|||n.7707152A>G||||||
PC1	Cq2A	7711045	Cq2A_7711045	6.18e-07	A	G	upstream_gene_variant	MODIFIER	MODIFIER	c.-15782A>G
PC1	Cq2A	7717568	Cq2A_7717568	6.5e-07	T	G	5_prime_UTR_premature_start_codon_gain_variant	LOW	MODIFIER	c.-4573T>G
PC1	Cq2A	7737980	Cq2A_7737980	7.82e-07	C	T	intron_variant	c.300-327C>T		T|intron_variant|MODIFIER|CQ053396|CQ053396|transcript|CQ053396-RA|protein_coding|3/3|c.300-327C>T||||||
PC1	Cq2A	7738728	Cq2A_7738728	3.47e-08	G	C	3_prime_UTR_variant	c.*316G>C		C|3_prime_UTR_variant|MODIFIER|CQ053396|CQ053396|transcript|CQ053396-RA|protein_coding|4/4|c.*316G>C|||||316|
PC1	Cq2A	7738753	Cq2A_7738753	2.61e-11	T	A	3_prime_UTR_variant	c.*341T>A		A|3_prime_UTR_variant|MODIFIER|CQ053396|CQ053396|transcript|CQ053396-RA|protein_coding|4/4|c.*341T>A|||||341|
PC1	Cq2A	7739550	Cq2A_7739550	2.7e-08	G	A	downstream_gene_variant	MODIFIER	MODIFIER	c.*1138G>A
PC1	Cq2A	7741646	Cq2A_7741646	9.36e-08	C	G	downstream_gene_variant	MODIFIER	MODIFIER	c.*3234C>G
PC1	Cq2A	7741793	Cq2A_7741793	6.7e-07	A	G	downstream_gene_variant	MODIFIER	MODIFIER	c.*3381A>G
PC1	Cq2A	7748703	Cq2A_7748703	4.09e-08	G	T	intergenic_region	n.7748703G>T		T|intergenic_region|MODIFIER|CQ053396-CQ053397|CQ053396-CQ053397|intergenic_region|CQ053396-CQ053397|||n.7748703G>T||||||
PC1	Cq2A	7751984	Cq2A_7751984	6.12e-08	T	A	intergenic_region	n.7751984T>A		A|intergenic_region|MODIFIER|CQ053396-CQ053397|CQ053396-CQ053397|intergenic_region|CQ053396-CQ053397|||n.7751984T>A||||||
PC1	Cq2A	7751990	Cq2A_7751990	4.72e-08	A	C	intergenic_region	n.7751990A>C		C|intergenic_region|MODIFIER|CQ053396-CQ053397|CQ053396-CQ053397|intergenic_region|CQ053396-CQ053397|||n.7751990A>C||||||
PC1	Cq2A	7759768	Cq2A_7759768	5.32e-07	A	G	upstream_gene_variant	MODIFIER	MODIFIER	c.-2920A>G
PC1	Cq2A	7763997	Cq2A_7763997	1.18e-07	T	A	upstream_gene_variant	MODIFIER	MODIFIER	c.-1698T>A
PC1	Cq2A	7800764	Cq2A_7800764	2.63e-08	T	G	intergenic_region	n.7800764T>G		G|intergenic_region|MODIFIER|CQ053399-CQ053400|CQ053399-CQ053400|intergenic_region|CQ053399-CQ053400|||n.7800764T>G||||||
PC1	Cq2A	7804696	Cq2A_7804696	3.5e-07	A	T	intergenic_region	n.7804696A>T		T|intergenic_region|MODIFIER|CQ053399-CQ053400|CQ053399-CQ053400|intergenic_region|CQ053399-CQ053400|||n.7804696A>T||||||
PC1	Cq2A	7804697	Cq2A_7804697	3.5e-07	A	G	intergenic_region	n.7804697A>G		G|intergenic_region|MODIFIER|CQ053399-CQ053400|CQ053399-CQ053400|intergenic_region|CQ053399-CQ053400|||n.7804697A>G||||||
PC1	Cq2A	7814995	Cq2A_7814995	2.7e-07	C	A	intron_variant	c.*146-273G>T		A|intron_variant|MODIFIER|CQ053400|CQ053400|transcript|CQ053400-RA|protein_coding|8/9|c.*146-273G>T||||||
PC1	Cq2A	7835234	Cq2A_7835234	8.94e-07	A	G	upstream_gene_variant	MODIFIER	MODIFIER	c.-4975A>G
PC1	Cq2A	7844073	Cq2A_7844073	5.89e-07	A	G	downstream_gene_variant	MODIFIER	MODIFIER	c.*3793A>G
PC1	Cq2A	7984131	Cq2A_7984131	9.12e-07	T	G	intergenic_region	n.7984131T>G		G|intergenic_region|MODIFIER|CQ053410-CQ053411|CQ053410-CQ053411|intergenic_region|CQ053410-CQ053411|||n.7984131T>G||||||
PC1	Cq2A	8024999	Cq2A_8024999	2.71e-07	T	C	intergenic_region	n.8024999T>C		C|intergenic_region|MODIFIER|CQ053410-CQ053411|CQ053410-CQ053411|intergenic_region|CQ053410-CQ053411|||n.8024999T>C||||||
PC1	Cq2A	8052334	Cq2A_8052334	5.71e-07	T	C	intergenic_region	n.8052334T>C		C|intergenic_region|MODIFIER|CQ053410-CQ053411|CQ053410-CQ053411|intergenic_region|CQ053410-CQ053411|||n.8052334T>C||||||
PC1	Cq2A	8080505	Cq2A_8080505	6.2e-12	G	C	upstream_gene_variant	MODIFIER	MODIFIER	c.-2890C>G
PC1	Cq2A	8080510	Cq2A_8080510	7.54e-12	C	A	upstream_gene_variant	MODIFIER	MODIFIER	c.-2895G>T
PC1	Cq2A	8080517	Cq2A_8080517	9.37e-10	G	A	upstream_gene_variant	MODIFIER	MODIFIER	c.-2902C>T
PC1	Cq2A	8080536	Cq2A_8080536	1.36e-07	G	A	upstream_gene_variant	MODIFIER	MODIFIER	c.-2921C>T
PC1	Cq2A	8080642	Cq2A_8080642	5.24e-07	C	T	upstream_gene_variant	MODIFIER	MODIFIER	c.-3027G>A
PC1	Cq2A	8080661	Cq2A_8080661	8.96e-07	A	G	upstream_gene_variant	MODIFIER	MODIFIER	c.-3046T>C
PC1	Cq2A	8080689	Cq2A_8080689	7.39e-09	A	G	upstream_gene_variant	MODIFIER	MODIFIER	c.-3074T>C
PC1	Cq2A	8080691	Cq2A_8080691	7.39e-09	T	G	upstream_gene_variant	MODIFIER	MODIFIER	c.-3076A>C
PC1	Cq2A	8080697	Cq2A_8080697	6.8e-09	T	C	upstream_gene_variant	MODIFIER	MODIFIER	c.-3082A>G
PC1	Cq2A	8080706	Cq2A_8080706	1.22e-09	A	G	upstream_gene_variant	MODIFIER	MODIFIER	c.-3091T>C
PC1	Cq2A	8080707	Cq2A_8080707	9.32e-10	A	C	upstream_gene_variant	MODIFIER	MODIFIER	c.-3092T>G
PC1	Cq2A	8081365	Cq2A_8081365	5.61e-07	G	A	upstream_gene_variant	MODIFIER	MODIFIER	c.-3750C>T
PC1	Cq2A	8083242	Cq2A_8083242	2.6e-07	C	T	downstream_gene_variant	MODIFIER	MODIFIER	c.*3947G>A
PC1	Cq2A	8086774	Cq2A_8086774	5.11e-09	G	A	3_prime_UTR_variant	c.*415C>T		A|3_prime_UTR_variant|MODIFIER|CQ053414|CQ053414|transcript|CQ053414-RA|protein_coding|7/7|c.*415C>T|||||415|
PC1	Cq2A	8086999	Cq2A_8086999	4.39e-07	T	A	3_prime_UTR_variant	c.*190A>T		A|3_prime_UTR_variant|MODIFIER|CQ053414|CQ053414|transcript|CQ053414-RA|protein_coding|7/7|c.*190A>T|||||190|
PC1	Cq2A	8087067	Cq2A_8087067	3.42e-07	T	A	3_prime_UTR_variant	c.*122A>T		A|3_prime_UTR_variant|MODIFIER|CQ053414|CQ053414|transcript|CQ053414-RA|protein_coding|7/7|c.*122A>T|||||122|
PC1	Cq2A	8088428	Cq2A_8088428	3.43e-08	A	G	intron_variant	c.702+1018T>C		G|intron_variant|MODIFIER|CQ053414|CQ053414|transcript|CQ053414-RA|protein_coding|6/6|c.702+1018T>C||||||
PC1	Cq2A	8088438	Cq2A_8088438	8.27e-09	T	G	intron_variant	c.702+1008A>C		G|intron_variant|MODIFIER|CQ053414|CQ053414|transcript|CQ053414-RA|protein_coding|6/6|c.702+1008A>C||||||
PC1	Cq2A	8088548	Cq2A_8088548	1.94e-09	C	A	intron_variant	c.702+898G>T		A|intron_variant|MODIFIER|CQ053414|CQ053414|transcript|CQ053414-RA|protein_coding|6/6|c.702+898G>T||||||
PC1	Cq2A	8088607	Cq2A_8088607	2.54e-08	G	A	intron_variant	c.702+839C>T		A|intron_variant|MODIFIER|CQ053414|CQ053414|transcript|CQ053414-RA|protein_coding|6/6|c.702+839C>T||||||
PC1	Cq2A	8088627	Cq2A_8088627	4.62e-08	C	T	intron_variant	c.702+819G>A		T|intron_variant|MODIFIER|CQ053414|CQ053414|transcript|CQ053414-RA|protein_coding|6/6|c.702+819G>A||||||
PC1	Cq2A	8088946	Cq2A_8088946	2.56e-07	A	G	intron_variant	c.702+500T>C		G|intron_variant|MODIFIER|CQ053414|CQ053414|transcript|CQ053414-RA|protein_coding|6/6|c.702+500T>C||||||
PC1	Cq2A	8089503	Cq2A_8089503	1.92e-07	G	T	synonymous_variant	c.645C>A	p.Thr215Thr	T|synonymous_variant|LOW|CQ053414|CQ053414|transcript|CQ053414-RA|protein_coding|6/7|c.645C>A|p.Thr215Thr|825/1381|645/777|215/258||
PC1	Cq2A	8089602	Cq2A_8089602	5.88e-07	T	C	synonymous_variant	c.546A>G	p.Gln182Gln	C|synonymous_variant|LOW|CQ053414|CQ053414|transcript|CQ053414-RA|protein_coding|6/7|c.546A>G|p.Gln182Gln|726/1381|546/777|182/258||
PC1	Cq2A	8090049	Cq2A_8090049	3.93e-08	G	T	intron_variant	c.526-427C>A		T|intron_variant|MODIFIER|CQ053414|CQ053414|transcript|CQ053414-RA|protein_coding|5/6|c.526-427C>A||||||
PC1	Cq2A	8090430	Cq2A_8090430	1.22e-08	G	T	intron_variant	c.525+803C>A		T|intron_variant|MODIFIER|CQ053414|CQ053414|transcript|CQ053414-RA|protein_coding|5/6|c.525+803C>A||||||
PC1	Cq2A	8090474	Cq2A_8090474	2.72e-10	T	C	intron_variant	c.525+759A>G		C|intron_variant|MODIFIER|CQ053414|CQ053414|transcript|CQ053414-RA|protein_coding|5/6|c.525+759A>G||||||
PC1	Cq2A	8090512	Cq2A_8090512	3.58e-10	C	A	intron_variant	c.525+721G>T		A|intron_variant|MODIFIER|CQ053414|CQ053414|transcript|CQ053414-RA|protein_coding|5/6|c.525+721G>T||||||
PC1	Cq2A	8090579	Cq2A_8090579	1.61e-07	A	G	intron_variant	c.525+654T>C		G|intron_variant|MODIFIER|CQ053414|CQ053414|transcript|CQ053414-RA|protein_coding|5/6|c.525+654T>C||||||
PC1	Cq2A	8090614	Cq2A_8090614	4.03e-09	A	C	intron_variant	c.525+619T>G		C|intron_variant|MODIFIER|CQ053414|CQ053414|transcript|CQ053414-RA|protein_coding|5/6|c.525+619T>G||||||
PC1	Cq2A	8090653	Cq2A_8090653	6.85e-08	T	C	intron_variant	c.525+580A>G		C|intron_variant|MODIFIER|CQ053414|CQ053414|transcript|CQ053414-RA|protein_coding|5/6|c.525+580A>G||||||
PC1	Cq2A	8090684	Cq2A_8090684	3.9e-09	T	G	intron_variant	c.525+549A>C		G|intron_variant|MODIFIER|CQ053414|CQ053414|transcript|CQ053414-RA|protein_coding|5/6|c.525+549A>C||||||
PC1	Cq2A	8091344	Cq2A_8091344	8.97e-07	G	A	splice_region_variant&synonymous_variant	c.414C>T	p.Phe138Phe	A|splice_region_variant&synonymous_variant|LOW|CQ053414|CQ053414|transcript|CQ053414-RA|protein_coding|5/7|c.414C>T|p.Phe138Phe|594/1381|414/777|138/258||
PC1	Cq2A	8091446	Cq2A_8091446	1.04e-10	A	C	intron_variant	c.412-100T>G		C|intron_variant|MODIFIER|CQ053414|CQ053414|transcript|CQ053414-RA|protein_coding|4/6|c.412-100T>G||||||
PC1	Cq2A	8091617	Cq2A_8091617	2.46e-09	T	G	intron_variant	c.411+56A>C		G|intron_variant|MODIFIER|CQ053414|CQ053414|transcript|CQ053414-RA|protein_coding|4/6|c.411+56A>C||||||
PC1	Cq2A	8091745	Cq2A_8091745	2.92e-09	G	A	synonymous_variant	c.339C>T	p.Thr113Thr	A|synonymous_variant|LOW|CQ053414|CQ053414|transcript|CQ053414-RA|protein_coding|4/7|c.339C>T|p.Thr113Thr|519/1381|339/777|113/258||
PC1	Cq2A	8092111	Cq2A_8092111	7.6e-10	T	A	intron_variant	c.333-360A>T		A|intron_variant|MODIFIER|CQ053414|CQ053414|transcript|CQ053414-RA|protein_coding|3/6|c.333-360A>T||||||
PC1	Cq2A	8092198	Cq2A_8092198	3.93e-07	A	G	intron_variant	c.332+281T>C		G|intron_variant|MODIFIER|CQ053414|CQ053414|transcript|CQ053414-RA|protein_coding|3/6|c.332+281T>C||||||
PC1	Cq2A	8092231	Cq2A_8092231	3.12e-07	G	T	intron_variant	c.332+248C>A		T|intron_variant|MODIFIER|CQ053414|CQ053414|transcript|CQ053414-RA|protein_coding|3/6|c.332+248C>A||||||
PC1	Cq2A	8092408	Cq2A_8092408	3.67e-08	A	T	intron_variant	c.332+71T>A		T|intron_variant|MODIFIER|CQ053414|CQ053414|transcript|CQ053414-RA|protein_coding|3/6|c.332+71T>A||||||
PC1	Cq2A	8092409	Cq2A_8092409	9.32e-08	A	G	intron_variant	c.332+70T>C		G|intron_variant|MODIFIER|CQ053414|CQ053414|transcript|CQ053414-RA|protein_coding|3/6|c.332+70T>C||||||
PC1	Cq2A	8092442	Cq2A_8092442	1.26e-08	T	C	intron_variant	c.332+37A>G		C|intron_variant|MODIFIER|CQ053414|CQ053414|transcript|CQ053414-RA|protein_coding|3/6|c.332+37A>G||||||
PC1	Cq2A	8092470	Cq2A_8092470	1.3e-08	T	C	intron_variant	c.332+9A>G		C|intron_variant|MODIFIER|CQ053414|CQ053414|transcript|CQ053414-RA|protein_coding|3/6|c.332+9A>G||||||
PC1	Cq2A	8092545	Cq2A_8092545	8.98e-09	C	T	missense_variant	c.266G>A	p.Arg89Lys	T|missense_variant|MODERATE|CQ053414|CQ053414|transcript|CQ053414-RA|protein_coding|3/7|c.266G>A|p.Arg89Lys|446/1381|266/777|89/258||
PC1	Cq2A	8092678	Cq2A_8092678	1.83e-07	T	A	intron_variant	c.171-38A>T		A|intron_variant|MODIFIER|CQ053414|CQ053414|transcript|CQ053414-RA|protein_coding|2/6|c.171-38A>T||||||
PC1	Cq2A	8092739	Cq2A_8092739	7.59e-09	G	A	intron_variant	c.171-99C>T		A|intron_variant|MODIFIER|CQ053414|CQ053414|transcript|CQ053414-RA|protein_coding|2/6|c.171-99C>T||||||
PC1	Cq2A	8092767	Cq2A_8092767	4.55e-10	G	A	intron_variant	c.171-127C>T		A|intron_variant|MODIFIER|CQ053414|CQ053414|transcript|CQ053414-RA|protein_coding|2/6|c.171-127C>T||||||
PC1	Cq2A	8092770	Cq2A_8092770	1.16e-09	A	T	intron_variant	c.171-130T>A		T|intron_variant|MODIFIER|CQ053414|CQ053414|transcript|CQ053414-RA|protein_coding|2/6|c.171-130T>A||||||
PC1	Cq2A	8092791	Cq2A_8092791	2.2e-08	A	T	intron_variant	c.171-151T>A		T|intron_variant|MODIFIER|CQ053414|CQ053414|transcript|CQ053414-RA|protein_coding|2/6|c.171-151T>A||||||
PC1	Cq2A	8092835	Cq2A_8092835	5.14e-08	T	C	intron_variant	c.171-195A>G		C|intron_variant|MODIFIER|CQ053414|CQ053414|transcript|CQ053414-RA|protein_coding|2/6|c.171-195A>G||||||
PC1	Cq2A	8093035	Cq2A_8093035	8.42e-07	A	G	intron_variant	c.171-395T>C		G|intron_variant|MODIFIER|CQ053414|CQ053414|transcript|CQ053414-RA|protein_coding|2/6|c.171-395T>C||||||
PC1	Cq2A	8093181	Cq2A_8093181	9.71e-09	C	A	intron_variant	c.171-541G>T		A|intron_variant|MODIFIER|CQ053414|CQ053414|transcript|CQ053414-RA|protein_coding|2/6|c.171-541G>T||||||
PC1	Cq2A	8093443	Cq2A_8093443	2.19e-09	T	A	intron_variant	c.170+634A>T		A|intron_variant|MODIFIER|CQ053414|CQ053414|transcript|CQ053414-RA|protein_coding|2/6|c.170+634A>T||||||
PC1	Cq2A	8093485	Cq2A_8093485	1.99e-09	C	T	intron_variant	c.170+592G>A		T|intron_variant|MODIFIER|CQ053414|CQ053414|transcript|CQ053414-RA|protein_coding|2/6|c.170+592G>A||||||
PC1	Cq2A	8093529	Cq2A_8093529	5.24e-10	T	C	intron_variant	c.170+548A>G		C|intron_variant|MODIFIER|CQ053414|CQ053414|transcript|CQ053414-RA|protein_coding|2/6|c.170+548A>G||||||
PC1	Cq2A	8093547	Cq2A_8093547	5.86e-13	C	G	intron_variant	c.170+530G>C		G|intron_variant|MODIFIER|CQ053414|CQ053414|transcript|CQ053414-RA|protein_coding|2/6|c.170+530G>C||||||
PC1	Cq2A	8095642	Cq2A_8095642	1.41e-10	C	T	upstream_gene_variant	MODIFIER	MODIFIER	c.-1272G>A
PC1	Cq2A	8095650	Cq2A_8095650	2.7e-09	T	C	upstream_gene_variant	MODIFIER	MODIFIER	c.-1280A>G
PC1	Cq2A	8095656	Cq2A_8095656	2.51e-09	A	C	upstream_gene_variant	MODIFIER	MODIFIER	c.-1286T>G
PC1	Cq2A	8096468	Cq2A_8096468	8.81e-07	C	A	upstream_gene_variant	MODIFIER	MODIFIER	c.-2098G>T
PC1	Cq2A	8096902	Cq2A_8096902	8.67e-08	C	T	upstream_gene_variant	MODIFIER	MODIFIER	c.-2532G>A
PC1	Cq2A	8097511	Cq2A_8097511	9.9e-08	T	C	upstream_gene_variant	MODIFIER	MODIFIER	c.-3141A>G
PC1	Cq2A	8098058	Cq2A_8098058	6.28e-10	A	C	upstream_gene_variant	MODIFIER	MODIFIER	c.-3688T>G
PC1	Cq2A	8098368	Cq2A_8098368	2.48e-08	G	A	upstream_gene_variant	MODIFIER	MODIFIER	c.-3998C>T
PC1	Cq2A	8099002	Cq2A_8099002	7.19e-07	T	C	upstream_gene_variant	MODIFIER	MODIFIER	c.-4632A>G
PC1	Cq2A	8100362	Cq2A_8100362	4.25e-09	C	G	intergenic_region	n.8100362C>G		G|intergenic_region|MODIFIER|CQ053414-CQ053415|CQ053414-CQ053415|intergenic_region|CQ053414-CQ053415|||n.8100362C>G||||||
PC1	Cq2A	8100517	Cq2A_8100517	3.33e-07	C	T	intergenic_region	n.8100517C>T		T|intergenic_region|MODIFIER|CQ053414-CQ053415|CQ053414-CQ053415|intergenic_region|CQ053414-CQ053415|||n.8100517C>T||||||
PC1	Cq2A	8100740	Cq2A_8100740	4.42e-09	A	G	intergenic_region	n.8100740A>G		G|intergenic_region|MODIFIER|CQ053414-CQ053415|CQ053414-CQ053415|intergenic_region|CQ053414-CQ053415|||n.8100740A>G||||||
PC1	Cq2A	8100769	Cq2A_8100769	8.03e-09	G	A	intergenic_region	n.8100769G>A		A|intergenic_region|MODIFIER|CQ053414-CQ053415|CQ053414-CQ053415|intergenic_region|CQ053414-CQ053415|||n.8100769G>A||||||
PC1	Cq2A	8100801	Cq2A_8100801	4.5e-07	G	A	intergenic_region	n.8100801G>A		A|intergenic_region|MODIFIER|CQ053414-CQ053415|CQ053414-CQ053415|intergenic_region|CQ053414-CQ053415|||n.8100801G>A||||||
PC1	Cq2A	8100824	Cq2A_8100824	1.77e-08	G	A	intergenic_region	n.8100824G>A		A|intergenic_region|MODIFIER|CQ053414-CQ053415|CQ053414-CQ053415|intergenic_region|CQ053414-CQ053415|||n.8100824G>A||||||
PC1	Cq2A	8100988	Cq2A_8100988	6.88e-08	G	A	intergenic_region	n.8100988G>A		A|intergenic_region|MODIFIER|CQ053414-CQ053415|CQ053414-CQ053415|intergenic_region|CQ053414-CQ053415|||n.8100988G>A||||||
PC1	Cq2A	8101001	Cq2A_8101001	2.62e-08	A	G	intergenic_region	n.8101001A>G		G|intergenic_region|MODIFIER|CQ053414-CQ053415|CQ053414-CQ053415|intergenic_region|CQ053414-CQ053415|||n.8101001A>G||||||
PC1	Cq2A	8101026	Cq2A_8101026	2.55e-08	A	G	intergenic_region	n.8101026A>G		G|intergenic_region|MODIFIER|CQ053414-CQ053415|CQ053414-CQ053415|intergenic_region|CQ053414-CQ053415|||n.8101026A>G||||||
PC1	Cq2A	8101129	Cq2A_8101129	3.49e-09	G	C	intergenic_region	n.8101129G>C		C|intergenic_region|MODIFIER|CQ053414-CQ053415|CQ053414-CQ053415|intergenic_region|CQ053414-CQ053415|||n.8101129G>C||||||
PC1	Cq2A	8101350	Cq2A_8101350	1e-11	C	T	intergenic_region	n.8101350C>T		T|intergenic_region|MODIFIER|CQ053414-CQ053415|CQ053414-CQ053415|intergenic_region|CQ053414-CQ053415|||n.8101350C>T||||||
PC1	Cq2A	8101359	Cq2A_8101359	1.74e-10	A	G	intergenic_region	n.8101359A>G		G|intergenic_region|MODIFIER|CQ053414-CQ053415|CQ053414-CQ053415|intergenic_region|CQ053414-CQ053415|||n.8101359A>G||||||
PC1	Cq2A	8101405	Cq2A_8101405	9.47e-11	G	A	intergenic_region	n.8101405G>A		A|intergenic_region|MODIFIER|CQ053414-CQ053415|CQ053414-CQ053415|intergenic_region|CQ053414-CQ053415|||n.8101405G>A||||||
PC1	Cq2A	8101414	Cq2A_8101414	7.6e-09	A	G	intergenic_region	n.8101414A>G		G|intergenic_region|MODIFIER|CQ053414-CQ053415|CQ053414-CQ053415|intergenic_region|CQ053414-CQ053415|||n.8101414A>G||||||
PC1	Cq2A	8101912	Cq2A_8101912	4.69e-08	G	A	intergenic_region	n.8101912G>A		A|intergenic_region|MODIFIER|CQ053414-CQ053415|CQ053414-CQ053415|intergenic_region|CQ053414-CQ053415|||n.8101912G>A||||||
PC1	Cq2A	8101949	Cq2A_8101949	5.21e-09	G	A	intergenic_region	n.8101949G>A		A|intergenic_region|MODIFIER|CQ053414-CQ053415|CQ053414-CQ053415|intergenic_region|CQ053414-CQ053415|||n.8101949G>A||||||
PC1	Cq2A	8102372	Cq2A_8102372	2.89e-09	C	T	intergenic_region	n.8102372C>T		T|intergenic_region|MODIFIER|CQ053414-CQ053415|CQ053414-CQ053415|intergenic_region|CQ053414-CQ053415|||n.8102372C>T||||||
PC1	Cq2A	8102530	Cq2A_8102530	1.02e-09	A	G	intergenic_region	n.8102530A>G		G|intergenic_region|MODIFIER|CQ053414-CQ053415|CQ053414-CQ053415|intergenic_region|CQ053414-CQ053415|||n.8102530A>G||||||
PC1	Cq2A	8102563	Cq2A_8102563	1.66e-10	C	T	intergenic_region	n.8102563C>T		T|intergenic_region|MODIFIER|CQ053414-CQ053415|CQ053414-CQ053415|intergenic_region|CQ053414-CQ053415|||n.8102563C>T||||||
PC1	Cq2A	8102628	Cq2A_8102628	3.31e-07	C	T	intergenic_region	n.8102628C>T		T|intergenic_region|MODIFIER|CQ053414-CQ053415|CQ053414-CQ053415|intergenic_region|CQ053414-CQ053415|||n.8102628C>T||||||
PC1	Cq2A	8102644	Cq2A_8102644	3.83e-07	T	G	intergenic_region	n.8102644T>G		G|intergenic_region|MODIFIER|CQ053414-CQ053415|CQ053414-CQ053415|intergenic_region|CQ053414-CQ053415|||n.8102644T>G||||||
PC1	Cq2A	8102695	Cq2A_8102695	2.12e-08	G	A	intergenic_region	n.8102695G>A		A|intergenic_region|MODIFIER|CQ053414-CQ053415|CQ053414-CQ053415|intergenic_region|CQ053414-CQ053415|||n.8102695G>A||||||
PC1	Cq2A	8103082	Cq2A_8103082	5.77e-09	A	C	intergenic_region	n.8103082A>C		C|intergenic_region|MODIFIER|CQ053414-CQ053415|CQ053414-CQ053415|intergenic_region|CQ053414-CQ053415|||n.8103082A>C||||||
PC1	Cq2A	8103150	Cq2A_8103150	3.03e-07	C	A	intergenic_region	n.8103150C>A		A|intergenic_region|MODIFIER|CQ053414-CQ053415|CQ053414-CQ053415|intergenic_region|CQ053414-CQ053415|||n.8103150C>A||||||
PC1	Cq2A	8103153	Cq2A_8103153	3.03e-07	C	T	intergenic_region	n.8103153C>T		T|intergenic_region|MODIFIER|CQ053414-CQ053415|CQ053414-CQ053415|intergenic_region|CQ053414-CQ053415|||n.8103153C>T||||||
PC1	Cq2A	8103514	Cq2A_8103514	9.77e-09	C	A	intergenic_region	n.8103514C>A		A|intergenic_region|MODIFIER|CQ053414-CQ053415|CQ053414-CQ053415|intergenic_region|CQ053414-CQ053415|||n.8103514C>A||||||
PC1	Cq2A	8103734	Cq2A_8103734	3.8e-08	T	C	intergenic_region	n.8103734T>C		C|intergenic_region|MODIFIER|CQ053414-CQ053415|CQ053414-CQ053415|intergenic_region|CQ053414-CQ053415|||n.8103734T>C||||||
PC1	Cq2A	8103741	Cq2A_8103741	3.86e-08	C	T	intergenic_region	n.8103741C>T		T|intergenic_region|MODIFIER|CQ053414-CQ053415|CQ053414-CQ053415|intergenic_region|CQ053414-CQ053415|||n.8103741C>T||||||
PC1	Cq2A	8103985	Cq2A_8103985	1.29e-09	G	A	intergenic_region	n.8103985G>A		A|intergenic_region|MODIFIER|CQ053414-CQ053415|CQ053414-CQ053415|intergenic_region|CQ053414-CQ053415|||n.8103985G>A||||||
PC1	Cq2A	8104079	Cq2A_8104079	1.53e-07	T	G	intergenic_region	n.8104079T>G		G|intergenic_region|MODIFIER|CQ053414-CQ053415|CQ053414-CQ053415|intergenic_region|CQ053414-CQ053415|||n.8104079T>G||||||
PC1	Cq2A	8104427	Cq2A_8104427	2.56e-08	C	T	intergenic_region	n.8104427C>T		T|intergenic_region|MODIFIER|CQ053414-CQ053415|CQ053414-CQ053415|intergenic_region|CQ053414-CQ053415|||n.8104427C>T||||||
PC1	Cq2A	8104433	Cq2A_8104433	1.93e-09	G	A	intergenic_region	n.8104433G>A		A|intergenic_region|MODIFIER|CQ053414-CQ053415|CQ053414-CQ053415|intergenic_region|CQ053414-CQ053415|||n.8104433G>A||||||
PC1	Cq2A	8104537	Cq2A_8104537	4.03e-08	C	T	intergenic_region	n.8104537C>T		T|intergenic_region|MODIFIER|CQ053414-CQ053415|CQ053414-CQ053415|intergenic_region|CQ053414-CQ053415|||n.8104537C>T||||||
PC1	Cq2A	8104612	Cq2A_8104612	5.25e-07	A	G	intergenic_region	n.8104612A>G		G|intergenic_region|MODIFIER|CQ053414-CQ053415|CQ053414-CQ053415|intergenic_region|CQ053414-CQ053415|||n.8104612A>G||||||
PC1	Cq2A	8104773	Cq2A_8104773	3.36e-08	A	T	intergenic_region	n.8104773A>T		T|intergenic_region|MODIFIER|CQ053414-CQ053415|CQ053414-CQ053415|intergenic_region|CQ053414-CQ053415|||n.8104773A>T||||||
PC1	Cq2A	8105045	Cq2A_8105045	1.3e-08	A	C	intergenic_region	n.8105045A>C		C|intergenic_region|MODIFIER|CQ053414-CQ053415|CQ053414-CQ053415|intergenic_region|CQ053414-CQ053415|||n.8105045A>C||||||
PC1	Cq2A	8105049	Cq2A_8105049	6.65e-07	C	T	intergenic_region	n.8105049C>T		T|intergenic_region|MODIFIER|CQ053414-CQ053415|CQ053414-CQ053415|intergenic_region|CQ053414-CQ053415|||n.8105049C>T||||||
PC1	Cq2A	8105140	Cq2A_8105140	5.16e-08	G	A	intergenic_region	n.8105140G>A		A|intergenic_region|MODIFIER|CQ053414-CQ053415|CQ053414-CQ053415|intergenic_region|CQ053414-CQ053415|||n.8105140G>A||||||
PC1	Cq2A	8105521	Cq2A_8105521	4.01e-08	A	G	intergenic_region	n.8105521A>G		G|intergenic_region|MODIFIER|CQ053414-CQ053415|CQ053414-CQ053415|intergenic_region|CQ053414-CQ053415|||n.8105521A>G||||||
PC1	Cq2A	8105539	Cq2A_8105539	4.95e-09	C	T	intergenic_region	n.8105539C>T		T|intergenic_region|MODIFIER|CQ053414-CQ053415|CQ053414-CQ053415|intergenic_region|CQ053414-CQ053415|||n.8105539C>T||||||
PC1	Cq2A	8105579	Cq2A_8105579	5.64e-07	T	C	intergenic_region	n.8105579T>C		C|intergenic_region|MODIFIER|CQ053414-CQ053415|CQ053414-CQ053415|intergenic_region|CQ053414-CQ053415|||n.8105579T>C||||||
PC1	Cq2A	8105846	Cq2A_8105846	7.73e-10	G	A	intergenic_region	n.8105846G>A		A|intergenic_region|MODIFIER|CQ053414-CQ053415|CQ053414-CQ053415|intergenic_region|CQ053414-CQ053415|||n.8105846G>A||||||
PC1	Cq2A	8110071	Cq2A_8110071	9.03e-10	C	T	intergenic_region	n.8110071C>T		T|intergenic_region|MODIFIER|CQ053414-CQ053415|CQ053414-CQ053415|intergenic_region|CQ053414-CQ053415|||n.8110071C>T||||||
PC1	Cq2A	8111611	Cq2A_8111611	6.19e-07	T	G	intergenic_region	n.8111611T>G		G|intergenic_region|MODIFIER|CQ053414-CQ053415|CQ053414-CQ053415|intergenic_region|CQ053414-CQ053415|||n.8111611T>G||||||
PC1	Cq2A	8111634	Cq2A_8111634	4.85e-07	C	T	intergenic_region	n.8111634C>T		T|intergenic_region|MODIFIER|CQ053414-CQ053415|CQ053414-CQ053415|intergenic_region|CQ053414-CQ053415|||n.8111634C>T||||||
PC1	Cq2A	8111657	Cq2A_8111657	1.09e-07	T	C	intergenic_region	n.8111657T>C		C|intergenic_region|MODIFIER|CQ053414-CQ053415|CQ053414-CQ053415|intergenic_region|CQ053414-CQ053415|||n.8111657T>C||||||
PC1	Cq2A	8112095	Cq2A_8112095	9.14e-08	A	G	intergenic_region	n.8112095A>G		G|intergenic_region|MODIFIER|CQ053414-CQ053415|CQ053414-CQ053415|intergenic_region|CQ053414-CQ053415|||n.8112095A>G||||||
PC1	Cq2A	8112121	Cq2A_8112121	2.65e-08	T	A	intergenic_region	n.8112121T>A		A|intergenic_region|MODIFIER|CQ053414-CQ053415|CQ053414-CQ053415|intergenic_region|CQ053414-CQ053415|||n.8112121T>A||||||
PC1	Cq2A	8112137	Cq2A_8112137	2.81e-08	A	G	intergenic_region	n.8112137A>G		G|intergenic_region|MODIFIER|CQ053414-CQ053415|CQ053414-CQ053415|intergenic_region|CQ053414-CQ053415|||n.8112137A>G||||||
PC1	Cq2A	8112167	Cq2A_8112167	5.26e-07	A	C	intergenic_region	n.8112167A>C		C|intergenic_region|MODIFIER|CQ053414-CQ053415|CQ053414-CQ053415|intergenic_region|CQ053414-CQ053415|||n.8112167A>C||||||
PC1	Cq2A	8112202	Cq2A_8112202	1.11e-07	T	C	intergenic_region	n.8112202T>C		C|intergenic_region|MODIFIER|CQ053414-CQ053415|CQ053414-CQ053415|intergenic_region|CQ053414-CQ053415|||n.8112202T>C||||||
PC1	Cq2A	8112232	Cq2A_8112232	3.43e-07	T	C	intergenic_region	n.8112232T>C		C|intergenic_region|MODIFIER|CQ053414-CQ053415|CQ053414-CQ053415|intergenic_region|CQ053414-CQ053415|||n.8112232T>C||||||
PC1	Cq2A	8112234	Cq2A_8112234	3.43e-07	G	A	intergenic_region	n.8112234G>A		A|intergenic_region|MODIFIER|CQ053414-CQ053415|CQ053414-CQ053415|intergenic_region|CQ053414-CQ053415|||n.8112234G>A||||||
PC1	Cq2A	8112240	Cq2A_8112240	4.44e-07	C	T	intergenic_region	n.8112240C>T		T|intergenic_region|MODIFIER|CQ053414-CQ053415|CQ053414-CQ053415|intergenic_region|CQ053414-CQ053415|||n.8112240C>T||||||
PC1	Cq2A	8112737	Cq2A_8112737	6.87e-07	T	C	intergenic_region	n.8112737T>C		C|intergenic_region|MODIFIER|CQ053414-CQ053415|CQ053414-CQ053415|intergenic_region|CQ053414-CQ053415|||n.8112737T>C||||||
PC1	Cq2A	8113265	Cq2A_8113265	3.26e-08	T	G	intergenic_region	n.8113265T>G		G|intergenic_region|MODIFIER|CQ053414-CQ053415|CQ053414-CQ053415|intergenic_region|CQ053414-CQ053415|||n.8113265T>G||||||
PC1	Cq2A	8113712	Cq2A_8113712	2.61e-07	A	G	intergenic_region	n.8113712A>G		G|intergenic_region|MODIFIER|CQ053414-CQ053415|CQ053414-CQ053415|intergenic_region|CQ053414-CQ053415|||n.8113712A>G||||||
PC1	Cq2A	8114820	Cq2A_8114820	4.81e-08	C	T	intergenic_region	n.8114820C>T		T|intergenic_region|MODIFIER|CQ053414-CQ053415|CQ053414-CQ053415|intergenic_region|CQ053414-CQ053415|||n.8114820C>T||||||
PC1	Cq2A	8114856	Cq2A_8114856	1.31e-07	A	G	intergenic_region	n.8114856A>G		G|intergenic_region|MODIFIER|CQ053414-CQ053415|CQ053414-CQ053415|intergenic_region|CQ053414-CQ053415|||n.8114856A>G||||||
PC1	Cq2A	8114984	Cq2A_8114984	7.94e-07	T	C	intergenic_region	n.8114984T>C		C|intergenic_region|MODIFIER|CQ053414-CQ053415|CQ053414-CQ053415|intergenic_region|CQ053414-CQ053415|||n.8114984T>C||||||
PC1	Cq2A	8115362	Cq2A_8115362	8.14e-08	G	T	intergenic_region	n.8115362G>T		T|intergenic_region|MODIFIER|CQ053414-CQ053415|CQ053414-CQ053415|intergenic_region|CQ053414-CQ053415|||n.8115362G>T||||||
PC1	Cq2A	8115444	Cq2A_8115444	3.31e-10	G	A	intergenic_region	n.8115444G>A		A|intergenic_region|MODIFIER|CQ053414-CQ053415|CQ053414-CQ053415|intergenic_region|CQ053414-CQ053415|||n.8115444G>A||||||
PC1	Cq2A	8115470	Cq2A_8115470	3.79e-09	A	C	intergenic_region	n.8115470A>C		C|intergenic_region|MODIFIER|CQ053414-CQ053415|CQ053414-CQ053415|intergenic_region|CQ053414-CQ053415|||n.8115470A>C||||||
PC1	Cq2A	8115471	Cq2A_8115471	3.79e-09	T	C	intergenic_region	n.8115471T>C		C|intergenic_region|MODIFIER|CQ053414-CQ053415|CQ053414-CQ053415|intergenic_region|CQ053414-CQ053415|||n.8115471T>C||||||
PC1	Cq2A	8115621	Cq2A_8115621	7.89e-08	C	T	intergenic_region	n.8115621C>T		T|intergenic_region|MODIFIER|CQ053414-CQ053415|CQ053414-CQ053415|intergenic_region|CQ053414-CQ053415|||n.8115621C>T||||||
PC1	Cq2A	8116510	Cq2A_8116510	9.56e-08	C	G	intergenic_region	n.8116510C>G		G|intergenic_region|MODIFIER|CQ053414-CQ053415|CQ053414-CQ053415|intergenic_region|CQ053414-CQ053415|||n.8116510C>G||||||
PC1	Cq2A	8116626	Cq2A_8116626	6.81e-08	G	C	intergenic_region	n.8116626G>C		C|intergenic_region|MODIFIER|CQ053414-CQ053415|CQ053414-CQ053415|intergenic_region|CQ053414-CQ053415|||n.8116626G>C||||||
PC1	Cq2A	8116642	Cq2A_8116642	1.09e-11	T	C	intergenic_region	n.8116642T>C		C|intergenic_region|MODIFIER|CQ053414-CQ053415|CQ053414-CQ053415|intergenic_region|CQ053414-CQ053415|||n.8116642T>C||||||
PC1	Cq2A	8116664	Cq2A_8116664	2.62e-08	C	T	intergenic_region	n.8116664C>T		T|intergenic_region|MODIFIER|CQ053414-CQ053415|CQ053414-CQ053415|intergenic_region|CQ053414-CQ053415|||n.8116664C>T||||||
PC1	Cq2A	8116733	Cq2A_8116733	5.18e-09	A	G	intergenic_region	n.8116733A>G		G|intergenic_region|MODIFIER|CQ053414-CQ053415|CQ053414-CQ053415|intergenic_region|CQ053414-CQ053415|||n.8116733A>G||||||
PC1	Cq2A	8118388	Cq2A_8118388	2.78e-07	T	C	upstream_gene_variant	MODIFIER	MODIFIER	c.-4650T>C
PC1	Cq2A	8120066	Cq2A_8120066	8.57e-07	T	C	upstream_gene_variant	MODIFIER	MODIFIER	c.-2972T>C
PC1	Cq2A	8120797	Cq2A_8120797	2.11e-07	A	C	upstream_gene_variant	MODIFIER	MODIFIER	c.-2241A>C
PC1	Cq2A	8133976	Cq2A_8133976	2.95e-09	G	A	downstream_gene_variant	intergenic_region	MODIFIER	MODIFIER
PC1	Cq2A	8137455	Cq2A_8137455	7.76e-09	C	T	missense_variant	MODERATE	MODIFIER	c.44G>A
PC1	Cq2A	8137928	Cq2A_8137928	2.99e-08	G	A	upstream_gene_variant	intergenic_region	MODIFIER	MODIFIER
PC1	Cq2A	8139292	Cq2A_8139292	1.25e-07	G	A	upstream_gene_variant	MODIFIER	MODIFIER	c.-1794C>T
PC1	Cq2A	8139322	Cq2A_8139322	5.14e-07	T	C	upstream_gene_variant	MODIFIER	MODIFIER	c.-1824A>G
PC1	Cq2A	8140192	Cq2A_8140192	1.77e-07	C	T	upstream_gene_variant	MODIFIER	MODIFIER	c.-2694G>A
PC1	Cq2A	8142666	Cq2A_8142666	7.36e-07	G	T	intergenic_region	n.8142666G>T		T|intergenic_region|MODIFIER|CQ053417-CQ053418|CQ053417-CQ053418|intergenic_region|CQ053417-CQ053418|||n.8142666G>T||||||
PC1	Cq2A	8143502	Cq2A_8143502	2.38e-07	T	C	intergenic_region	n.8143502T>C		C|intergenic_region|MODIFIER|CQ053417-CQ053418|CQ053417-CQ053418|intergenic_region|CQ053417-CQ053418|||n.8143502T>C||||||
PC1	Cq2A	8146043	Cq2A_8146043	1.4e-07	G	A	intergenic_region	n.8146043G>A		A|intergenic_region|MODIFIER|CQ053417-CQ053418|CQ053417-CQ053418|intergenic_region|CQ053417-CQ053418|||n.8146043G>A||||||
PC1	Cq2A	8146197	Cq2A_8146197	7.48e-08	G	A	intergenic_region	n.8146197G>A		A|intergenic_region|MODIFIER|CQ053417-CQ053418|CQ053417-CQ053418|intergenic_region|CQ053417-CQ053418|||n.8146197G>A||||||
PC1	Cq2A	8146209	Cq2A_8146209	6.33e-08	G	A	intergenic_region	n.8146209G>A		A|intergenic_region|MODIFIER|CQ053417-CQ053418|CQ053417-CQ053418|intergenic_region|CQ053417-CQ053418|||n.8146209G>A||||||
PC1	Cq2A	8153843	Cq2A_8153843	5.59e-07	C	A	upstream_gene_variant	MODIFIER	MODIFIER	c.-2567C>A
PC1	Cq2A	8153878	Cq2A_8153878	6.04e-08	C	T	upstream_gene_variant	MODIFIER	MODIFIER	c.-2532C>T
PC1	Cq2A	8161689	Cq2A_8161689	7.23e-09	T	C	missense_variant	c.2255T>C	p.Leu752Pro	C|missense_variant|MODERATE|CQ053418|CQ053418|transcript|CQ053418-RA|protein_coding|6/13|c.2255T>C|p.Leu752Pro|2255/7459|2255/4635|752/1544||
PC1	Cq2A	8164912	Cq2A_8164912	1.12e-07	A	G	missense_variant	c.3494A>G	p.Gln1165Arg	G|missense_variant|MODERATE|CQ053418|CQ053418|transcript|CQ053418-RA|protein_coding|8/13|c.3494A>G|p.Gln1165Arg|3494/7459|3494/4635|1165/1544||
PC1	Cq2A	8595866	Cq2A_8595866	6.04e-08	T	C	intergenic_region	n.8595866T>C		C|intergenic_region|MODIFIER|CQ053441-CQ053442|CQ053441-CQ053442|intergenic_region|CQ053441-CQ053442|||n.8595866T>C||||||
PC1	Cq2A	8800991	Cq2A_8800991	1.97e-07	A	C	intron_variant	c.1078+78T>G		C|intron_variant|MODIFIER|CQ053451|CQ053451|transcript|CQ053451-RA|protein_coding|2/10|c.1078+78T>G||||||
PC1	Cq2A	8807067	Cq2A_8807067	7.3e-08	A	C	upstream_gene_variant	MODIFIER	MODIFIER	c.-3598T>G
PC1	Cq2A	11627727	Cq2A_11627727	1.39e-07	C	T	intergenic_region	n.11627727C>T		T|intergenic_region|MODIFIER|CQ053573-CQ053574|CQ053573-CQ053574|intergenic_region|CQ053573-CQ053574|||n.11627727C>T||||||
PC1	Cq2A	14040475	Cq2A_14040475	9.58e-09	T	G	intergenic_region	n.14040475T>G		G|intergenic_region|MODIFIER|CQ053679-CQ053680|CQ053679-CQ053680|intergenic_region|CQ053679-CQ053680|||n.14040475T>G||||||
PC1	Cq2A	16014258	Cq2A_16014258	2.43e-10	A	C	intergenic_region	n.16014258A>C		C|intergenic_region|MODIFIER|CQ053762-CQ053764|CQ053762-CQ053764|intergenic_region|CQ053762-CQ053764|||n.16014258A>C||||||
PC1	Cq2A	16127074	Cq2A_16127074	8.92e-07	T	C	intergenic_region	n.16127074T>C		C|intergenic_region|MODIFIER|CQ053764-CQ053765|CQ053764-CQ053765|intergenic_region|CQ053764-CQ053765|||n.16127074T>C||||||
PC1	Cq2A	19163084	Cq2A_19163084	1.45e-07	A	G	downstream_gene_variant	MODIFIER	MODIFIER	c.*1731T>C
PC1	Cq2A	19443558	Cq2A_19443558	9.14e-07	A	G	intergenic_region	n.19443558A>G		G|intergenic_region|MODIFIER|CQ053857-CQ053858|CQ053857-CQ053858|intergenic_region|CQ053857-CQ053858|||n.19443558A>G||||||
PC1	Cq2A	20357805	Cq2A_20357805	6.38e-07	T	C	intergenic_region	n.20357805T>C		C|intergenic_region|MODIFIER|CQ053884-CQ053885|CQ053884-CQ053885|intergenic_region|CQ053884-CQ053885|||n.20357805T>C||||||
PC1	Cq2A	20978396	Cq2A_20978396	9.27e-07	T	C	intergenic_region	n.20978396T>C		C|intergenic_region|MODIFIER|CQ053896-CQ053897|CQ053896-CQ053897|intergenic_region|CQ053896-CQ053897|||n.20978396T>C||||||
PC1	Cq2A	34714337	Cq2A_34714337	1.23e-09	C	T	intron_variant	c.864+14C>T		T|intron_variant|MODIFIER|CQ054216|CQ054216|transcript|CQ054216-RA|protein_coding|13/21|c.864+14C>T||||||
PC1	Cq2A	35525531	Cq2A_35525531	1.21e-09	G	C	downstream_gene_variant	MODIFIER	MODIFIER	c.*2850G>C
PC1	Cq2A	35706947	Cq2A_35706947	7.8e-07	A	C	intergenic_region	n.35706947A>C		C|intergenic_region|MODIFIER|CQ054257-CQ054258|CQ054257-CQ054258|intergenic_region|CQ054257-CQ054258|||n.35706947A>C||||||
PC1	Cq2A	35725840	Cq2A_35725840	2.75e-07	T	G	upstream_gene_variant	intergenic_region	MODIFIER	MODIFIER
PC1	Cq2A	35730326	Cq2A_35730326	1.86e-07	C	G	intron_variant	c.122+167C>G		G|intron_variant|MODIFIER|CQ054260|CQ054260|transcript|CQ054260-RA|protein_coding|3/13|c.122+167C>G||||||
PC1	Cq2A	35738860	Cq2A_35738860	1.28e-07	T	C	downstream_gene_variant	MODIFIER	MODIFIER	c.*2525A>G
PC1	Cq2A	35751065	Cq2A_35751065	2.61e-09	A	T	intergenic_region	n.35751065A>T		T|intergenic_region|MODIFIER|CQ054261-CQ054262|CQ054261-CQ054262|intergenic_region|CQ054261-CQ054262|||n.35751065A>T||||||
PC1	Cq2A	35759986	Cq2A_35759986	5.57e-07	T	A	intergenic_region	n.35759986T>A		A|intergenic_region|MODIFIER|CQ054261-CQ054262|CQ054261-CQ054262|intergenic_region|CQ054261-CQ054262|||n.35759986T>A||||||
PC1	Cq2A	35760067	Cq2A_35760067	2.34e-08	G	C	intergenic_region	n.35760067G>C		C|intergenic_region|MODIFIER|CQ054261-CQ054262|CQ054261-CQ054262|intergenic_region|CQ054261-CQ054262|||n.35760067G>C||||||
PC1	Cq2A	35772394	Cq2A_35772394	6.23e-07	T	G	intergenic_region	n.35772394T>G		G|intergenic_region|MODIFIER|CQ054261-CQ054262|CQ054261-CQ054262|intergenic_region|CQ054261-CQ054262|||n.35772394T>G||||||
PC1	Cq2A	35779950	Cq2A_35779950	5.05e-07	A	T	intergenic_region	n.35779950A>T		T|intergenic_region|MODIFIER|CQ054261-CQ054262|CQ054261-CQ054262|intergenic_region|CQ054261-CQ054262|||n.35779950A>T||||||
PC1	Cq2A	35819227	Cq2A_35819227	7.13e-07	G	A	upstream_gene_variant	MODIFIER	MODIFIER	c.-1838C>T
PC1	Cq3A	45179672	Cq3A_45179672	4.52e-07	A	G	intergenic_region	n.45179672A>G		G|intergenic_region|MODIFIER|CQ046078-CQ046079|CQ046078-CQ046079|intergenic_region|CQ046078-CQ046079|||n.45179672A>G||||||
PC1	Cq3A	45769981	Cq3A_45769981	8.22e-07	A	G	intergenic_region	n.45769981A>G		G|intergenic_region|MODIFIER|CQ046105-CQ046106|CQ046105-CQ046106|intergenic_region|CQ046105-CQ046106|||n.45769981A>G||||||
PC1	Cq3A	46829349	Cq3A_46829349	7.86e-07	C	T	intergenic_region	n.46829349C>T		T|intergenic_region|MODIFIER|CQ046146-CQ046147|CQ046146-CQ046147|intergenic_region|CQ046146-CQ046147|||n.46829349C>T||||||
PC1	Cq3A	47025259	Cq3A_47025259	5.87e-07	C	G	intergenic_region	n.47025259C>G		G|intergenic_region|MODIFIER|CQ046149-CQ046150|CQ046149-CQ046150|intergenic_region|CQ046149-CQ046150|||n.47025259C>G||||||
PC1	Cq3A	47115698	Cq3A_47115698	6.93e-07	T	G	intergenic_region	n.47115698T>G		G|intergenic_region|MODIFIER|CQ046149-CQ046150|CQ046149-CQ046150|intergenic_region|CQ046149-CQ046150|||n.47115698T>G||||||
PC1	Cq3A	47119966	Cq3A_47119966	7.2e-07	A	G	intergenic_region	n.47119966A>G		G|intergenic_region|MODIFIER|CQ046149-CQ046150|CQ046149-CQ046150|intergenic_region|CQ046149-CQ046150|||n.47119966A>G||||||
PC1	Cq3A	47238725	Cq3A_47238725	6.25e-07	T	G	intergenic_region	n.47238725T>G		G|intergenic_region|MODIFIER|CQ046151-CQ046152|CQ046151-CQ046152|intergenic_region|CQ046151-CQ046152|||n.47238725T>G||||||
PC1	Cq4A	4052433	Cq4A_4052433	5.79e-07	T	C	intron_variant	c.790+219A>G		C|intron_variant|MODIFIER|CQ035362|CQ035362|transcript|CQ035362-RA|protein_coding|2/2|c.790+219A>G||||||
PC1	Cq4A	7884904	Cq4A_7884904	4.39e-07	A	G	missense_variant	MODERATE	MODIFIER	c.31A>G
PC1	Cq4A	9204407	Cq4A_9204407	1.93e-08	T	C	intergenic_region	n.9204407T>C		C|intergenic_region|MODIFIER|CQ035900-CQ035901|CQ035900-CQ035901|intergenic_region|CQ035900-CQ035901|||n.9204407T>C||||||
PC1	Cq4A	21379455	Cq4A_21379455	2.97e-08	G	T	intergenic_region	n.21379455G>T		T|intergenic_region|MODIFIER|CQ036431-CQ036432|CQ036431-CQ036432|intergenic_region|CQ036431-CQ036432|||n.21379455G>T||||||
PC1	Cq4A	53584255	Cq4A_53584255	2.93e-07	A	G	3_prime_UTR_variant	c.*39A>G		G|3_prime_UTR_variant|MODIFIER|CQ037458|CQ037458|transcript|CQ037458-RA|protein_coding|3/4|c.*39A>G|||||39|
PC1	Cq4A	53733986	Cq4A_53733986	7.6e-07	G	A	upstream_gene_variant	intergenic_region	MODIFIER	MODIFIER
PC1	Cq5A	8834321	Cq5A_8834321	4.74e-07	C	A	intergenic_region	n.8834321C>A		A|intergenic_region|MODIFIER|CQ029696-CQ029697|CQ029696-CQ029697|intergenic_region|CQ029696-CQ029697|||n.8834321C>A||||||
PC1	Cq6A	13911706	Cq6A_13911706	4.99e-07	A	T	intergenic_region	n.13911706A>T		T|intergenic_region|MODIFIER|CQ026315-CQ026316|CQ026315-CQ026316|intergenic_region|CQ026315-CQ026316|||n.13911706A>T||||||
PC1	Cq6A	13925586	Cq6A_13925586	2.02e-07	G	C	intergenic_region	n.13925586G>C		C|intergenic_region|MODIFIER|CQ026315-CQ026316|CQ026315-CQ026316|intergenic_region|CQ026315-CQ026316|||n.13925586G>C||||||
PC1	Cq6A	13971037	Cq6A_13971037	1.46e-07	A	C	intron_variant	c.361-2307A>C		C|intron_variant|MODIFIER|CQ026316|CQ026316|transcript|CQ026316-RA|protein_coding|3/4|c.361-2307A>C||||||
PC1	Cq6A	13991758	Cq6A_13991758	3.46e-08	C	A	intron_variant	c.578-29C>A		A|intron_variant|MODIFIER|CQ026317|CQ026317|transcript|CQ026317-RA|protein_coding|2/9|c.578-29C>A||||||
PC1	Cq6A	13993522	Cq6A_13993522	2.11e-08	G	A	intron_variant	c.987-39G>A		A|intron_variant|MODIFIER|CQ026317|CQ026317|transcript|CQ026317-RA|protein_coding|6/9|c.987-39G>A||||||
PC1	Cq6A	14002252	Cq6A_14002252	1.63e-07	T	A	intergenic_region	n.14002252T>A		A|intergenic_region|MODIFIER|CQ026317-CQ026318|CQ026317-CQ026318|intergenic_region|CQ026317-CQ026318|||n.14002252T>A||||||
PC1	Cq6A	14092563	Cq6A_14092563	6.09e-07	C	T	intergenic_region	n.14092563C>T		T|intergenic_region|MODIFIER|CQ026320-CQ026321|CQ026320-CQ026321|intergenic_region|CQ026320-CQ026321|||n.14092563C>T||||||
PC1	Cq6A	14143276	Cq6A_14143276	1.6e-07	A	G	missense_variant	c.329A>G	p.His110Arg	G|missense_variant|MODERATE|CQ026321|CQ026321|transcript|CQ026321-RA|protein_coding|3/10|c.329A>G|p.His110Arg|329/969|329/969|110/322||
PC1	Cq6A	14164315	Cq6A_14164315	1.49e-07	C	T	intergenic_region	n.14164315C>T		T|intergenic_region|MODIFIER|CQ026321-CQ026322|CQ026321-CQ026322|intergenic_region|CQ026321-CQ026322|||n.14164315C>T||||||
PC1	Cq6A	14210269	Cq6A_14210269	3.81e-07	T	C	upstream_gene_variant	intergenic_region	MODIFIER	MODIFIER
PC1	Cq6A	14233434	Cq6A_14233434	6.5e-07	T	C	intergenic_region	n.14233434T>C		C|intergenic_region|MODIFIER|CQ026325-CQ026326|CQ026325-CQ026326|intergenic_region|CQ026325-CQ026326|||n.14233434T>C||||||
PC1	Cq6A	14239695	Cq6A_14239695	6.24e-07	T	C	intergenic_region	n.14239695T>C		C|intergenic_region|MODIFIER|CQ026325-CQ026326|CQ026325-CQ026326|intergenic_region|CQ026325-CQ026326|||n.14239695T>C||||||
PC1	Cq6A	14239727	Cq6A_14239727	2.17e-07	A	T	intergenic_region	n.14239727A>T		T|intergenic_region|MODIFIER|CQ026325-CQ026326|CQ026325-CQ026326|intergenic_region|CQ026325-CQ026326|||n.14239727A>T||||||
PC1	Cq6A	14240253	Cq6A_14240253	3.72e-07	C	T	intergenic_region	n.14240253C>T		T|intergenic_region|MODIFIER|CQ026325-CQ026326|CQ026325-CQ026326|intergenic_region|CQ026325-CQ026326|||n.14240253C>T||||||
PC1	Cq6A	14278159	Cq6A_14278159	5.93e-08	T	C	downstream_gene_variant	intergenic_region	MODIFIER	MODIFIER
PC1	Cq6A	14350146	Cq6A_14350146	2.76e-08	G	T	intergenic_region	n.14350146G>T		T|intergenic_region|MODIFIER|CQ026328-CQ026329|CQ026328-CQ026329|intergenic_region|CQ026328-CQ026329|||n.14350146G>T||||||
PC1	Cq6A	14357251	Cq6A_14357251	5.15e-07	G	A	intergenic_region	n.14357251G>A		A|intergenic_region|MODIFIER|CQ026328-CQ026329|CQ026328-CQ026329|intergenic_region|CQ026328-CQ026329|||n.14357251G>A||||||
PC1	Cq6A	65207547	Cq6A_65207547	3.57e-08	C	T	upstream_gene_variant	MODIFIER	MODIFIER	c.-4217C>T
PC1	Cq6A	65643054	Cq6A_65643054	3.71e-07	C	T	downstream_gene_variant	MODIFIER	MODIFIER	c.*2387C>T
PC1	Cq7A	31015319	Cq7A_31015319	7.68e-07	C	T	intergenic_region	n.31015319C>T		T|intergenic_region|MODIFIER|CQ042853-CQ042854|CQ042853-CQ042854|intergenic_region|CQ042853-CQ042854|||n.31015319C>T||||||
PC1	Cq7A	49428147	Cq7A_49428147	3.28e-07	G	T	downstream_gene_variant	MODIFIER	MODIFIER	c.*167G>T
PC1	Cq7A	49680236	Cq7A_49680236	2.79e-07	C	T	intergenic_region	n.49680236C>T		T|intergenic_region|MODIFIER|CQ043268-CQ043269|CQ043268-CQ043269|intergenic_region|CQ043268-CQ043269|||n.49680236C>T||||||
PC1	Cq8A	35159906	Cq8A_35159906	1.28e-08	T	C	intergenic_region	n.35159906T>C		C|intergenic_region|MODIFIER|CQ039432-CQ039433|CQ039432-CQ039433|intergenic_region|CQ039432-CQ039433|||n.35159906T>C||||||
PC1	Cq8A	35258219	Cq8A_35258219	1.82e-07	C	T	intron_variant	c.501+227C>T		T|intron_variant|MODIFIER|CQ039435|CQ039435|transcript|CQ039435-RA|protein_coding|4/8|c.501+227C>T||||||
PC1	Cq8A	35269073	Cq8A_35269073	8.44e-07	C	T	downstream_gene_variant	intergenic_region	MODIFIER	MODIFIER
PC1	Cq8A	35286897	Cq8A_35286897	4.22e-07	G	T	intergenic_region	n.35286897G>T		T|intergenic_region|MODIFIER|CQ039436-CQ039437|CQ039436-CQ039437|intergenic_region|CQ039436-CQ039437|||n.35286897G>T||||||
PC1	Cq8A	35314850	Cq8A_35314850	7.47e-07	A	C	intergenic_region	n.35314850A>C		C|intergenic_region|MODIFIER|CQ039436-CQ039437|CQ039436-CQ039437|intergenic_region|CQ039436-CQ039437|||n.35314850A>C||||||
PC1	Cq8A	35360611	Cq8A_35360611	7.59e-07	C	T	intergenic_region	n.35360611C>T		T|intergenic_region|MODIFIER|CQ039436-CQ039437|CQ039436-CQ039437|intergenic_region|CQ039436-CQ039437|||n.35360611C>T||||||
PC1	Cq8A	35488532	Cq8A_35488532	1.85e-08	C	T	intergenic_region	n.35488532C>T		T|intergenic_region|MODIFIER|CQ039439-CQ039440|CQ039439-CQ039440|intergenic_region|CQ039439-CQ039440|||n.35488532C>T||||||
PC1	Cq8A	35928007	Cq8A_35928007	1.99e-07	G	T	intergenic_region	n.35928007G>T		T|intergenic_region|MODIFIER|CQ039450-CQ039451|CQ039450-CQ039451|intergenic_region|CQ039450-CQ039451|||n.35928007G>T||||||
PC1	Cq8A	36176151	Cq8A_36176151	9.9e-09	C	T	intergenic_region	n.36176151C>T		T|intergenic_region|MODIFIER|CQ039463-CQ039464|CQ039463-CQ039464|intergenic_region|CQ039463-CQ039464|||n.36176151C>T||||||
PC1	Cq8A	36228418	Cq8A_36228418	4.3e-07	C	A	intergenic_region	n.36228418C>A		A|intergenic_region|MODIFIER|CQ039464-CQ039465|CQ039464-CQ039465|intergenic_region|CQ039464-CQ039465|||n.36228418C>A||||||
PC1	Cq9A	12884587	Cq9A_12884587	1.44e-07	A	G	intergenic_region	n.12884587A>G		G|intergenic_region|MODIFIER|CQ050519-CQ050520|CQ050519-CQ050520|intergenic_region|CQ050519-CQ050520|||n.12884587A>G||||||
PC1	Cq9A	42320500	Cq9A_42320500	6.32e-07	T	C	intergenic_region	n.42320500T>C		C|intergenic_region|MODIFIER|CQ051418-CQ051419|CQ051418-CQ051419|intergenic_region|CQ051418-CQ051419|||n.42320500T>C||||||
PC1	Cq2B	883786	Cq2B_883786	2.25e-07	T	A	intergenic_region	n.883786T>A		A|intergenic_region|MODIFIER|CQ013132-CQ013133|CQ013132-CQ013133|intergenic_region|CQ013132-CQ013133|||n.883786T>A||||||
PC1	Cq2B	19242162	Cq2B_19242162	1.21e-07	G	T	intergenic_region	n.19242162G>T		T|intergenic_region|MODIFIER|CQ014124-CQ014125|CQ014124-CQ014125|intergenic_region|CQ014124-CQ014125|||n.19242162G>T||||||
PC1	Cq3B	1376257	Cq3B_1376257	1.4e-08	T	G	downstream_gene_variant	MODIFIER	MODIFIER	c.*2409T>G
PC1	Cq3B	1625507	Cq3B_1625507	2.98e-07	A	T	downstream_gene_variant	MODIFIER	MODIFIER	c.*3561T>A
PC1	Cq3B	65336061	Cq3B_65336061	1.5e-08	A	T	intergenic_region	n.65336061A>T		T|intergenic_region|MODIFIER|CQ019016-CQ019017|CQ019016-CQ019017|intergenic_region|CQ019016-CQ019017|||n.65336061A>T||||||
PC1	Cq3B	65336064	Cq3B_65336064	1.49e-08	A	G	intergenic_region	n.65336064A>G		G|intergenic_region|MODIFIER|CQ019016-CQ019017|CQ019016-CQ019017|intergenic_region|CQ019016-CQ019017|||n.65336064A>G||||||
PC1	Cq3B	65336089	Cq3B_65336089	3.32e-07	T	C	intergenic_region	n.65336089T>C		C|intergenic_region|MODIFIER|CQ019016-CQ019017|CQ019016-CQ019017|intergenic_region|CQ019016-CQ019017|||n.65336089T>C||||||
PC1	Cq3B	65336102	Cq3B_65336102	6.91e-08	C	T	intergenic_region	n.65336102C>T		T|intergenic_region|MODIFIER|CQ019016-CQ019017|CQ019016-CQ019017|intergenic_region|CQ019016-CQ019017|||n.65336102C>T||||||
PC1	Cq4B	3070104	Cq4B_3070104	6.7e-08	G	A	upstream_gene_variant	intergenic_region	MODIFIER	MODIFIER
PC1	Cq4B	66684739	Cq4B_66684739	2.75e-07	C	T	5_prime_UTR_variant	upstream_gene_variant	MODIFIER	MODIFIER
PC1	Cq5B	101698	Cq5B_101698	4.29e-07	A	G	downstream_gene_variant	MODIFIER	MODIFIER	c.*3588A>G
PC1	Cq5B	372139	Cq5B_372139	3.04e-08	A	G	downstream_gene_variant	MODIFIER	MODIFIER	c.*3223T>C
PC1	Cq5B	388782	Cq5B_388782	4.93e-07	T	C	intergenic_region	n.388782T>C		C|intergenic_region|MODIFIER|CQ003500-CQ003501|CQ003500-CQ003501|intergenic_region|CQ003500-CQ003501|||n.388782T>C||||||
PC1	Cq5B	1129011	Cq5B_1129011	8.48e-07	A	T	intergenic_region	n.1129011A>T		T|intergenic_region|MODIFIER|CQ003579-CQ003580|CQ003579-CQ003580|intergenic_region|CQ003579-CQ003580|||n.1129011A>T||||||
PC1	Cq5B	8348919	Cq5B_8348919	6.27e-07	G	A	intergenic_region	n.8348919G>A		A|intergenic_region|MODIFIER|CQ004294-CQ004295|CQ004294-CQ004295|intergenic_region|CQ004294-CQ004295|||n.8348919G>A||||||
PC1	Cq5B	34472487	Cq5B_34472487	4.91e-07	T	A	downstream_gene_variant	MODIFIER	MODIFIER	c.*2423A>T
PC1	Cq6B	32260765	Cq6B_32260765	5.03e-07	C	T	intergenic_region	n.32260765C>T		T|intergenic_region|MODIFIER|CQ001265-CQ001268|CQ001265-CQ001268|intergenic_region|CQ001265-CQ001268|||n.32260765C>T||||||
PC1	Cq7B	21322742	Cq7B_21322742	7.81e-07	A	G	intergenic_region	n.21322742A>G		G|intergenic_region|MODIFIER|CQ008825-CQ008826|CQ008825-CQ008826|intergenic_region|CQ008825-CQ008826|||n.21322742A>G||||||
PC1	Cq7B	24551921	Cq7B_24551921	1.45e-08	C	T	upstream_gene_variant	MODIFIER	MODIFIER	c.-4244G>A
PC1	Cq7B	24553956	Cq7B_24553956	2.23e-08	G	T	intergenic_region	n.24553956G>T		T|intergenic_region|MODIFIER|CQ008906-CQ008907|CQ008906-CQ008907|intergenic_region|CQ008906-CQ008907|||n.24553956G>T||||||
PC1	Cq7B	24557223	Cq7B_24557223	2.18e-09	T	C	intergenic_region	n.24557223T>C		C|intergenic_region|MODIFIER|CQ008906-CQ008907|CQ008906-CQ008907|intergenic_region|CQ008906-CQ008907|||n.24557223T>C||||||
PC1	Cq7B	24557871	Cq7B_24557871	5.12e-08	C	T	intergenic_region	n.24557871C>T		T|intergenic_region|MODIFIER|CQ008906-CQ008907|CQ008906-CQ008907|intergenic_region|CQ008906-CQ008907|||n.24557871C>T||||||
PC1	Cq7B	24559874	Cq7B_24559874	2.66e-08	G	T	intergenic_region	n.24559874G>T		T|intergenic_region|MODIFIER|CQ008906-CQ008907|CQ008906-CQ008907|intergenic_region|CQ008906-CQ008907|||n.24559874G>T||||||
PC1	Cq7B	24561219	Cq7B_24561219	1.75e-10	G	A	upstream_gene_variant	MODIFIER	MODIFIER	c.-3982G>A
PC1	Cq7B	24565101	Cq7B_24565101	1.76e-09	A	T	upstream_gene_variant	MODIFIER	MODIFIER	c.-100A>T
PC1	Cq7B	24569568	Cq7B_24569568	5.63e-09	A	C	downstream_gene_variant	MODIFIER	MODIFIER	c.*1734A>C
PC1	Cq7B	24582552	Cq7B_24582552	1.34e-07	G	A	intergenic_region	n.24582552G>A		A|intergenic_region|MODIFIER|CQ008907-CQ008908|CQ008907-CQ008908|intergenic_region|CQ008907-CQ008908|||n.24582552G>A||||||
PC1	Cq7B	24585396	Cq7B_24585396	3.99e-07	T	G	intergenic_region	n.24585396T>G		G|intergenic_region|MODIFIER|CQ008907-CQ008908|CQ008907-CQ008908|intergenic_region|CQ008907-CQ008908|||n.24585396T>G||||||
PC1	Cq7B	24589263	Cq7B_24589263	4.02e-10	G	A	intergenic_region	n.24589263G>A		A|intergenic_region|MODIFIER|CQ008907-CQ008908|CQ008907-CQ008908|intergenic_region|CQ008907-CQ008908|||n.24589263G>A||||||
PC1	Cq7B	24594006	Cq7B_24594006	8.36e-08	G	A	upstream_gene_variant	MODIFIER	MODIFIER	c.-3885G>A
PC1	Cq7B	24621794	Cq7B_24621794	5.37e-11	A	G	missense_variant	c.457A>G	p.Thr153Ala	G|missense_variant|MODERATE|CQ008912|CQ008912|transcript|CQ008912-RA|protein_coding|7/11|c.457A>G|p.Thr153Ala|457/774|457/774|153/257||
PC1	Cq8B	49318134	Cq8B_49318134	8.87e-08	C	G	missense_variant	c.33G>C	p.Lys11Asn	G|missense_variant|MODERATE|CQ011649|CQ011649|transcript|CQ011649-RA|protein_coding|1/2|c.33G>C|p.Lys11Asn|33/729|33/729|11/242||
PC1	Cq8B	58960558	Cq8B_58960558	2.9e-07	A	T	intron_variant	c.354+3528T>A		T|intron_variant|MODIFIER|CQ011895|CQ011895|transcript|CQ011895-RA|protein_coding|2/11|c.354+3528T>A||||||
PC1	Cq8B	59025351	Cq8B_59025351	5.99e-07	A	G	downstream_gene_variant	MODIFIER	MODIFIER	c.*863A>G
PC1	Cq8B	59622032	Cq8B_59622032	4.59e-08	A	G	downstream_gene_variant	MODIFIER	MODIFIER	c.*7131A>G
PC1	Cq9B	11443528	Cq9B_11443528	9.16e-08	G	A	upstream_gene_variant	MODIFIER	MODIFIER	c.-3914G>A
PC1	Cq9B	54926539	Cq9B_54926539	6.96e-07	G	T	intergenic_region	n.54926539G>T		T|intergenic_region|MODIFIER|CQ034379-CQ034380|CQ034379-CQ034380|intergenic_region|CQ034379-CQ034380|||n.54926539G>T||||||
PC1	Cq9B	55005013	Cq9B_55005013	3.67e-07	G	A	intergenic_region	n.55005013G>A		A|intergenic_region|MODIFIER|CQ034381-CQ034382|CQ034381-CQ034382|intergenic_region|CQ034381-CQ034382|||n.55005013G>A||||||
PC1	Cq9B	55005014	Cq9B_55005014	3.66e-07	T	A	intergenic_region	n.55005014T>A		A|intergenic_region|MODIFIER|CQ034381-CQ034382|CQ034381-CQ034382|intergenic_region|CQ034381-CQ034382|||n.55005014T>A||||||
PC1	Cq9B	55201181	Cq9B_55201181	3.57e-08	G	A	intergenic_region	n.55201181G>A		A|intergenic_region|MODIFIER|CQ034384-CQ034385|CQ034384-CQ034385|intergenic_region|CQ034384-CQ034385|||n.55201181G>A||||||
PC1	Cq9B	55271672	Cq9B_55271672	8.05e-07	C	T	intergenic_region	n.55271672C>T		T|intergenic_region|MODIFIER|CQ034388-CQ034390|CQ034388-CQ034390|intergenic_region|CQ034388-CQ034390|||n.55271672C>T||||||
PC1	Cq9B	55277131	Cq9B_55277131	2.27e-07	C	G	intergenic_region	n.55277131C>G		G|intergenic_region|MODIFIER|CQ034388-CQ034390|CQ034388-CQ034390|intergenic_region|CQ034388-CQ034390|||n.55277131C>G||||||
PC1	Cq9B	55304038	Cq9B_55304038	1.49e-07	G	A	intergenic_region	n.55304038G>A		A|intergenic_region|MODIFIER|CQ034390-CQ034391|CQ034390-CQ034391|intergenic_region|CQ034390-CQ034391|||n.55304038G>A||||||
PC1	Cq9B	55425561	Cq9B_55425561	2.52e-08	G	T	downstream_gene_variant	MODIFIER	MODIFIER	c.*464G>T
PC1	Cq9B	55772584	Cq9B_55772584	4.81e-07	A	T	intergenic_region	n.55772584A>T		T|intergenic_region|MODIFIER|CQ034403-CQ034404|CQ034403-CQ034404|intergenic_region|CQ034403-CQ034404|||n.55772584A>T||||||
PC2	Cq6A	41620518	Cq6A_41620518	8.35e-07	G	T	intergenic_region	n.41620518G>T		T|intergenic_region|MODIFIER|CQ026965-CQ026966|CQ026965-CQ026966|intergenic_region|CQ026965-CQ026966|||n.41620518G>T||||||
PC2	Cq9A	18470498	Cq9A_18470498	3.54e-07	C	T	intergenic_region	n.18470498C>T		T|intergenic_region|MODIFIER|CQ050675-CQ050676|CQ050675-CQ050676|intergenic_region|CQ050675-CQ050676|||n.18470498C>T||||||
PC2	Cq9A	42918187	Cq9A_42918187	1.38e-07	G	A	upstream_gene_variant	MODIFIER	MODIFIER	c.-5059C>T
PC2	Cq1B	13931540	Cq1B_13931540	3.69e-07	T	C	intergenic_region	n.13931540T>C		C|intergenic_region|MODIFIER|CQ023322-CQ023323|CQ023322-CQ023323|intergenic_region|CQ023322-CQ023323|||n.13931540T>C||||||
PC2	Cq3B	47874578	Cq3B_47874578	3.37e-07	C	A	intergenic_region	n.47874578C>A		A|intergenic_region|MODIFIER|CQ018254-CQ018255|CQ018254-CQ018255|intergenic_region|CQ018254-CQ018255|||n.47874578C>A||||||
PC2	Cq3B	47887692	Cq3B_47887692	7e-07	A	T	intergenic_region	n.47887692A>T		T|intergenic_region|MODIFIER|CQ018254-CQ018255|CQ018254-CQ018255|intergenic_region|CQ018254-CQ018255|||n.47887692A>T||||||
PC2	Cq4B	68468580	Cq4B_68468580	5.82e-07	T	A	intron_variant	c.207+657T>A		A|intron_variant|MODIFIER|CQ022480|CQ022480|transcript|CQ022480-RA|protein_coding|2/9|c.207+657T>A||||||
PC2	Cq5B	38973400	Cq5B_38973400	9.03e-07	C	T	intergenic_region	n.38973400C>T		T|intergenic_region|MODIFIER|CQ005258-CQ005259|CQ005258-CQ005259|intergenic_region|CQ005258-CQ005259|||n.38973400C>T||||||
PC2	Cq5B	68830056	Cq5B_68830056	2.26e-07	C	T	downstream_gene_variant	MODIFIER	MODIFIER	c.*6018G>A
PC2	Cq5B	68830060	Cq5B_68830060	1.52e-07	C	T	downstream_gene_variant	MODIFIER	MODIFIER	c.*6014G>A
PC2	Cq6B	17114807	Cq6B_17114807	2.37e-07	G	A	intergenic_region	n.17114807G>A		A|intergenic_region|MODIFIER|CQ000970-CQ000971|CQ000970-CQ000971|intergenic_region|CQ000970-CQ000971|||n.17114807G>A||||||
PC2	Cq6B	50719216	Cq6B_50719216	8.4e-07	G	T	intergenic_region	n.50719216G>T		T|intergenic_region|MODIFIER|CQ001434-CQ001435|CQ001434-CQ001435|intergenic_region|CQ001434-CQ001435|||n.50719216G>T||||||
PC2	Cq8B	49018648	Cq8B_49018648	7.01e-07	C	T	intergenic_region	n.49018648C>T		T|intergenic_region|MODIFIER|CQ011641-CQ011642|CQ011641-CQ011642|intergenic_region|CQ011641-CQ011642|||n.49018648C>T||||||
PC2	Cq8B	49533441	Cq8B_49533441	2.09e-08	G	A	intergenic_region	n.49533441G>A		A|intergenic_region|MODIFIER|CQ011656-CQ011657|CQ011656-CQ011657|intergenic_region|CQ011656-CQ011657|||n.49533441G>A||||||
PC2	Cq8B	49551145	Cq8B_49551145	3.42e-07	G	T	intergenic_region	n.49551145G>T		T|intergenic_region|MODIFIER|CQ011656-CQ011657|CQ011656-CQ011657|intergenic_region|CQ011656-CQ011657|||n.49551145G>T||||||
PC2	Cq8B	49633554	Cq8B_49633554	8.54e-07	A	T	intergenic_region	n.49633554A>T		T|intergenic_region|MODIFIER|CQ011657-CQ011658|CQ011657-CQ011658|intergenic_region|CQ011657-CQ011658|||n.49633554A>T||||||
PC2	Cq8B	49638583	Cq8B_49638583	4.83e-07	A	G	intergenic_region	n.49638583A>G		G|intergenic_region|MODIFIER|CQ011657-CQ011658|CQ011657-CQ011658|intergenic_region|CQ011657-CQ011658|||n.49638583A>G||||||
PC2	Cq8B	49638599	Cq8B_49638599	1.71e-07	C	T	intergenic_region	n.49638599C>T		T|intergenic_region|MODIFIER|CQ011657-CQ011658|CQ011657-CQ011658|intergenic_region|CQ011657-CQ011658|||n.49638599C>T||||||
PC2	Cq8B	49642054	Cq8B_49642054	9.35e-07	G	A	intergenic_region	n.49642054G>A		A|intergenic_region|MODIFIER|CQ011657-CQ011658|CQ011657-CQ011658|intergenic_region|CQ011657-CQ011658|||n.49642054G>A||||||
PC2	Cq8B	49674519	Cq8B_49674519	2.15e-07	C	T	intergenic_region	n.49674519C>T		T|intergenic_region|MODIFIER|CQ011657-CQ011658|CQ011657-CQ011658|intergenic_region|CQ011657-CQ011658|||n.49674519C>T||||||
PC2	Cq8B	49707454	Cq8B_49707454	6.55e-07	T	C	intron_variant	c.1476+1121T>C		C|intron_variant|MODIFIER|CQ011658|CQ011658|transcript|CQ011658-RA|protein_coding|5/6|c.1476+1121T>C||||||
PC2	Cq8B	49787472	Cq8B_49787472	2.57e-07	T	C	intergenic_region	n.49787472T>C		C|intergenic_region|MODIFIER|CQ011659-CQ011660|CQ011659-CQ011660|intergenic_region|CQ011659-CQ011660|||n.49787472T>C||||||
PC2	Cq8B	49839020	Cq8B_49839020	5.32e-08	G	A	intergenic_region	n.49839020G>A		A|intergenic_region|MODIFIER|CQ011659-CQ011660|CQ011659-CQ011660|intergenic_region|CQ011659-CQ011660|||n.49839020G>A||||||
PC2	Cq8B	49863863	Cq8B_49863863	3.9e-07	T	A	intergenic_region	n.49863863T>A		A|intergenic_region|MODIFIER|CQ011659-CQ011660|CQ011659-CQ011660|intergenic_region|CQ011659-CQ011660|||n.49863863T>A||||||
PC2	Cq8B	49947676	Cq8B_49947676	9.4e-08	C	G	synonymous_variant	c.1488G>C	p.Val496Val	G|synonymous_variant|LOW|CQ011662|CQ011662|transcript|CQ011662-RA|protein_coding|11/17|c.1488G>C|p.Val496Val|1633/3056|1488/2427|496/808||
PC2	Cq8B	50075213	Cq8B_50075213	8.47e-07	T	C	intergenic_region	n.50075213T>C		C|intergenic_region|MODIFIER|CQ011662-CQ011663|CQ011662-CQ011663|intergenic_region|CQ011662-CQ011663|||n.50075213T>C||||||
PC2	Cq8B	50082281	Cq8B_50082281	2.43e-07	C	T	intergenic_region	n.50082281C>T		T|intergenic_region|MODIFIER|CQ011662-CQ011663|CQ011662-CQ011663|intergenic_region|CQ011662-CQ011663|||n.50082281C>T||||||
PC2	Cq8B	50088679	Cq8B_50088679	5.57e-07	G	T	intergenic_region	n.50088679G>T		T|intergenic_region|MODIFIER|CQ011662-CQ011663|CQ011662-CQ011663|intergenic_region|CQ011662-CQ011663|||n.50088679G>T||||||
PC2	Cq8B	50166459	Cq8B_50166459	3.4e-07	A	G	intergenic_region	n.50166459A>G		G|intergenic_region|MODIFIER|CQ011662-CQ011663|CQ011662-CQ011663|intergenic_region|CQ011662-CQ011663|||n.50166459A>G||||||
PC2	Cq8B	50224721	Cq8B_50224721	5.41e-07	T	C	intergenic_region	n.50224721T>C		C|intergenic_region|MODIFIER|CQ011662-CQ011663|CQ011662-CQ011663|intergenic_region|CQ011662-CQ011663|||n.50224721T>C||||||
PC2	Cq8B	50262864	Cq8B_50262864	9.05e-07	A	G	intergenic_region	n.50262864A>G		G|intergenic_region|MODIFIER|CQ011662-CQ011663|CQ011662-CQ011663|intergenic_region|CQ011662-CQ011663|||n.50262864A>G||||||
PC2	Cq8B	50292948	Cq8B_50292948	1.49e-08	C	G	missense_variant	c.606G>C	p.Lys202Asn	G|missense_variant|MODERATE|CQ011664|CQ011664|transcript|CQ011664-RA|protein_coding|3/4|c.606G>C|p.Lys202Asn|868/1726|606/786|202/261||
PC2	Cq8B	50292961	Cq8B_50292961	1.37e-08	T	G	missense_variant	c.593A>C	p.Lys198Thr	G|missense_variant|MODERATE|CQ011664|CQ011664|transcript|CQ011664-RA|protein_coding|3/4|c.593A>C|p.Lys198Thr|855/1726|593/786|198/261||
PC2	Cq8B	50335561	Cq8B_50335561	1.13e-07	G	A	intergenic_region	n.50335561G>A		A|intergenic_region|MODIFIER|CQ011666-CQ011667|CQ011666-CQ011667|intergenic_region|CQ011666-CQ011667|||n.50335561G>A||||||
PC2	Cq8B	50382663	Cq8B_50382663	5.97e-07	A	T	intergenic_region	n.50382663A>T		T|intergenic_region|MODIFIER|CQ011666-CQ011667|CQ011666-CQ011667|intergenic_region|CQ011666-CQ011667|||n.50382663A>T||||||
PC2	Cq8B	50382966	Cq8B_50382966	1.45e-07	C	G	intergenic_region	n.50382966C>G		G|intergenic_region|MODIFIER|CQ011666-CQ011667|CQ011666-CQ011667|intergenic_region|CQ011666-CQ011667|||n.50382966C>G||||||
PC2	Cq8B	50418860	Cq8B_50418860	7.44e-08	G	A	intergenic_region	n.50418860G>A		A|intergenic_region|MODIFIER|CQ011666-CQ011667|CQ011666-CQ011667|intergenic_region|CQ011666-CQ011667|||n.50418860G>A||||||
PC2	Cq8B	50430524	Cq8B_50430524	5.37e-07	G	A	intergenic_region	n.50430524G>A		A|intergenic_region|MODIFIER|CQ011666-CQ011667|CQ011666-CQ011667|intergenic_region|CQ011666-CQ011667|||n.50430524G>A||||||
PC2	Cq8B	50466479	Cq8B_50466479	6.74e-08	G	A	intergenic_region	n.50466479G>A		A|intergenic_region|MODIFIER|CQ011666-CQ011667|CQ011666-CQ011667|intergenic_region|CQ011666-CQ011667|||n.50466479G>A||||||
PC2	Cq8B	69035836	Cq8B_69035836	2.24e-07	T	A	downstream_gene_variant	MODIFIER	MODIFIER	c.*2370T>A
PC2	Cq9B	3299705	Cq9B_3299705	5.64e-07	G	A	upstream_gene_variant	MODIFIER	MODIFIER	c.-4865G>A
PC2	Cq9B	3299707	Cq9B_3299707	5.64e-07	A	G	upstream_gene_variant	MODIFIER	MODIFIER	c.-4863A>G

## Sheet: Supplementary file 1f
Table S6: Summary of MTA associated with days to flowering, days to maturity, and plant height identified on chromosome Cq2A
Chromosome	Position	Marker	DTF	DTM	PH	PL
			P-value
Cq2A	4242017	02:4242017	3.14596e-08	6.8549e-10	2.91282e-08	4.42933e-07
Cq2A	4406829	02:4406829	1.62921e-08	8.55741e-10	5.91164e-08	2.8267e-07
Cq2A	8080505	02:8080505	4.52019e-07	2.00855e-11	3.69134e-08	8.19605e-08
Cq2A	8080510	02:8080510	5.12684e-07	1.83216e-11	7.20801e-08	7.5807e-08
Cq2A	8093547	02:8093547	4.6569e-09	3.96159e-14	1.42421e-08	1.50123e-07
Cq2A	8101350	02:8101350	4.0814e-07	4.05878e-12	9.24933e-08	1.46176e-07
Cq2A	8116642	02:8116642	3.86745e-08	3.43006e-09	1.87831e-08	7.67234e-07

## Sheet: Supplementary file 1g
Table S7: Candidate genes located in the 50kb flanking regions of significantly associated loci of the multivariate GWAS analysis
Trait/PC	Chromosme	Start	End	ID	Function
PC1	Cq6B	32223088	32223348	ID=CQ001266-RA	Protein of unknown function
PC1	Cq6B	32226583	32226798	ID=CQ001267-RA	Protein of unknown function
PC1	Cq6B	32221538	32235081	ID=CQ001265-RA	Similar to Gba2: Non-lysosomal glucosylceramidase (Rattus norvegicus OX%3D10116)
PC1	Cq6B	32292403	32296334	ID=CQ001269-RA	Protein of unknown function
PC1	Cq6B	32284024	32285532	ID=CQ001268-RA	Protein of unknown function
PC1	Cq5B	81647	81829	ID=CQ003473-RA	Protein of unknown function									c.115+142C>T	.	.	A|upstream_gene_variant|MODIFIER|CQ053085|CQ053085|transcript|CQ053085-RA|protein_coding||c.-4635G>A|||||4635|	A|intron_variant|MODIFIER|CQ053084|CQ053084|transcript|CQ053084-RA|protein_coding|2/15|c.115+142C>T||||||
PC1	Cq5B	73466	79821	ID=CQ003472-RA	Similar to Ddx59: Probable ATP-dependent RNA helicase DDX59 (Mus musculus OX%3D10090)
PC1	Cq5B	51892	56225	ID=CQ003470-RA	Protein of unknown function
PC1	Cq5B	71866	72339	ID=CQ003471-RA	Protein of unknown function									MODIFIER	c.-1138T>C	c.*1010T>C	c.77-26A>G	.	.	.	G|upstream_gene_variant|MODIFIER|CQ053087|CQ053087|transcript|CQ053087-RA|protein_coding||c.-1138T>C|||||1138|	G|downstream_gene_variant|MODIFIER|CQ053089|CQ053089|transcript|CQ053089-RA|protein_coding||c.*1010T>C|||||1010|	G|intron_variant|MODIFIER|CQ053088|CQ053088|transcript|CQ053088-RA|protein_coding|1/2|c.77-26A>G||||||
PC1	Cq5B	129374	130929	ID=CQ003476-RA	Protein of unknown function
PC1	Cq5B	145857	148462	ID=CQ003478-RA	Similar to L-lactate dehydrogenase A (Hordeum vulgare OX%3D4513)									MODIFIER	c.-4643A>C	c.*2443A>C	n.4179125A>C	.	.	.	C|upstream_gene_variant|MODIFIER|CQ053127|CQ053127|transcript|CQ053127-RA|protein_coding||c.-4643A>C|||||4493|	C|downstream_gene_variant|MODIFIER|CQ053126|CQ053126|transcript|CQ053126-RA|protein_coding||c.*2443A>C|||||2100|	C|intergenic_region|MODIFIER|CQ053126-CQ053127|CQ053126-CQ053127|intergenic_region|CQ053126-CQ053127|||n.4179125A>C||||||
PC1	Cq5B	95753	98110	ID=CQ003474-RA	Similar to SCL6: Scarecrow-like protein 6 (Arabidopsis thaliana OX%3D3702)
PC1	Cq5B	149465	153170	ID=CQ003479-RA	Similar to At5g47570: NADH dehydrogenase [ubiquinone] 1 beta subcomplex subunit 8%2C mitochondrial (Arabidopsis thaliana OX%3D3702)									n.4406829G>C	.	.	C|upstream_gene_variant|MODIFIER|CQ053143|CQ053143|transcript|CQ053143-RA|protein_coding||c.-5099C>G|||||4703|	C|intergenic_region|MODIFIER|CQ053143-CQ053144|CQ053143-CQ053144|intergenic_region|CQ053143-CQ053144|||n.4406829G>C||||||
PC1	Cq5B	122207	127169	ID=CQ003475-RA	Similar to ATG8F: Autophagy-related protein 8f (Arabidopsis thaliana OX%3D3702)
PC1	Cq5B	132325	136421	ID=CQ003477-RA	Protein of unknown function
PC1	Cq5B	349177	353607	ID=CQ003494-RA	Similar to At1g63370: Flavin-containing monooxygenase FMO GS-OX-like 5 (Arabidopsis thaliana OX%3D3702)
PC1	Cq5B	368334	375017	ID=CQ003498-RA	Similar to 3-oxoacyl-[acyl-carrier-protein] synthase III%2C chloroplastic (Spinacia oleracea OX%3D3562)
PC1	Cq5B	379916	380665	ID=CQ003500-RA	Similar to INP1: Protein INAPERTURATE POLLEN1 (Arabidopsis thaliana OX%3D3702)									c.1160-337G>A	.	.	T|downstream_gene_variant|MODIFIER|CQ053334|CQ053334|transcript|CQ053334-RA|protein_coding||c.*9586C>T|||||2811|	T|intron_variant|MODIFIER|CQ053336|CQ053336|transcript|CQ053336-RA|protein_coding|7/7|c.1160-337G>A||||||
PC1	Cq5B	374111	378093	ID=CQ003499-RA	Similar to GT19: Probable xyloglucan galactosyltransferase GT19 (Arabidopsis thaliana OX%3D3702)									MODIFIER	c.-2382C>T	c.*3135C>T	n.6793510G>A	.	.	.	A|upstream_gene_variant|MODIFIER|CQ053336|CQ053336|transcript|CQ053336-RA|protein_coding||c.-2382C>T|||||1700|	A|downstream_gene_variant|MODIFIER|CQ053337|CQ053337|transcript|CQ053337-RA|protein_coding||c.*3135C>T|||||2275|	A|intergenic_region|MODIFIER|CQ053336-CQ053337|CQ053336-CQ053337|intergenic_region|CQ053336-CQ053337|||n.6793510G>A||||||
PC1	Cq5B	352217	355581	ID=CQ003495-RA	Protein of unknown function									MODIFIER	c.-2906G>A	c.*2611G>A	n.6794034C>T	.	.	.	T|upstream_gene_variant|MODIFIER|CQ053336|CQ053336|transcript|CQ053336-RA|protein_coding||c.-2906G>A|||||2224|	T|downstream_gene_variant|MODIFIER|CQ053337|CQ053337|transcript|CQ053337-RA|protein_coding||c.*2611G>A|||||1751|	T|intergenic_region|MODIFIER|CQ053336-CQ053337|CQ053336-CQ053337|intergenic_region|CQ053336-CQ053337|||n.6794034C>T||||||
PC1	Cq5B	356924	358260	ID=CQ003496-RA	Similar to MLP31: MLP-like protein 31 (Arabidopsis thaliana OX%3D3702)									n.6851439G>A	.	.	A|upstream_gene_variant|MODIFIER|CQ053341|CQ053341|transcript|CQ053341-RA|protein_coding||c.-2989C>T|||||2989|WARNING_TRANSCRIPT_NO_STOP_CODON	A|intergenic_region|MODIFIER|CQ053341-CQ053342|CQ053341-CQ053342|intergenic_region|CQ053341-CQ053342|||n.6851439G>A||||||
PC1	Cq5B	321661	329953	ID=CQ003491-RA	Similar to APT3: Adenine phosphoribosyltransferase 3 (Arabidopsis thaliana OX%3D3702)									n.6851440T>A	.	.	A|upstream_gene_variant|MODIFIER|CQ053341|CQ053341|transcript|CQ053341-RA|protein_coding||c.-2990A>T|||||2990|WARNING_TRANSCRIPT_NO_STOP_CODON	A|intergenic_region|MODIFIER|CQ053341-CQ053342|CQ053341-CQ053342|intergenic_region|CQ053341-CQ053342|||n.6851440T>A||||||
PC1	Cq5B	337053	342610	ID=CQ003493-RA	Protein of unknown function									n.6851616A>T	.	.	T|upstream_gene_variant|MODIFIER|CQ053341|CQ053341|transcript|CQ053341-RA|protein_coding||c.-3166T>A|||||3166|WARNING_TRANSCRIPT_NO_STOP_CODON	T|intergenic_region|MODIFIER|CQ053341-CQ053342|CQ053341-CQ053342|intergenic_region|CQ053341-CQ053342|||n.6851616A>T||||||
PC1	Cq5B	335500	336513	ID=CQ003492-RA	Similar to Protein WRKY1 (Zea mays OX%3D4577)
PC1	Cq5B	427575	432619	ID=CQ003505-RA	Similar to SKU5: Monocopper oxidase-like protein SKU5 (Arabidopsis thaliana OX%3D3702)
PC1	Cq5B	407769	416129	ID=CQ003502-RA	Similar to tal: Transaldolase (Histophilus somni (strain 2336) OX%3D228400)
PC1	Cq5B	403701	406821	ID=CQ003501-RA	Similar to TPPG: Probable trehalose-phosphate phosphatase G (Arabidopsis thaliana OX%3D3702)									n.6864907G>A	.	.	A|downstream_gene_variant|MODIFIER|CQ053342|CQ053342|transcript|CQ053342-RA|protein_coding||c.*6809C>T|||||4408|WARNING_TRANSCRIPT_NO_START_CODON	A|intergenic_region|MODIFIER|CQ053341-CQ053342|CQ053341-CQ053342|intergenic_region|CQ053341-CQ053342|||n.6864907G>A||||||
PC1	Cq5B	416610	417080	ID=CQ003503-RA	Similar to BFRUCT3: Acid beta-fructofuranosidase 3%2C vacuolar (Arabidopsis thaliana OX%3D3702)
PC1	Cq5B	418511	420011	ID=CQ003504-RA	Similar to Acid beta-fructofuranosidase 2%2C vacuolar (Rosa hybrid cultivar OX%3D128735)
PC1	Cq5B	434675	434794	ID=CQ003506-RA	Similar to rps12-B: 30S ribosomal protein S12-B%2C chloroplastic (Populus trichocarpa OX%3D3694)									n.6876410G>T	.	.	T|upstream_gene_variant|MODIFIER|CQ053342|CQ053342|transcript|CQ053342-RA|protein_coding||c.-3337C>A|||||3337|WARNING_TRANSCRIPT_NO_START_CODON	T|intergenic_region|MODIFIER|CQ053342-CQ053343|CQ053342-CQ053343|intergenic_region|CQ053342-CQ053343|||n.6876410G>T||||||
PC1	Cq5B	1071386	1086003	ID=CQ003574-RA	Similar to MED34: Mediator of RNA polymerase II transcription subunit 34 (Arabidopsis thaliana OX%3D3702)
PC1	Cq5B	1091138	1096253	ID=CQ003576-RA	Protein of unknown function
PC1	Cq5B	1158553	1174626	ID=CQ003580-RA	Similar to Alpha-glucosidase 2 (Bacillus thermoamyloliquefaciens OX%3D1425)
PC1	Cq5B	1103850	1114247	ID=CQ003578-RA	Similar to PGIC: Glucose-6-phosphate isomerase%2C cytosolic (Spinacia oleracea OX%3D3562)
PC1	Cq5B	1096837	1101862	ID=CQ003577-RA	Similar to UBA2C: UBP1-associated protein 2C (Arabidopsis thaliana OX%3D3702)									n.6941626C>T	.	.	T|upstream_gene_variant|MODIFIER|CQ053343|CQ053343|transcript|CQ053343-RA|protein_coding||c.-3818C>T|||||3568|	T|intergenic_region|MODIFIER|CQ053342-CQ053343|CQ053342-CQ053343|intergenic_region|CQ053342-CQ053343|||n.6941626C>T||||||
PC1	Cq5B	1115203	1116682	ID=CQ003579-RA	Similar to Deoxyuridine 5'-triphosphate nucleotidohydrolase (Solanum lycopersicum OX%3D4081)									n.6942068G>A	.	.	A|upstream_gene_variant|MODIFIER|CQ053343|CQ053343|transcript|CQ053343-RA|protein_coding||c.-3376G>A|||||3126|	A|intergenic_region|MODIFIER|CQ053342-CQ053343|CQ053342-CQ053343|intergenic_region|CQ053342-CQ053343|||n.6942068G>A||||||
PC1	Cq5B	8368523	8368840	ID=CQ004295-RA	Similar to RHA1B: E3 ubiquitin-protein ligase RHA1B (Arabidopsis thaliana OX%3D3702)
PC1	Cq5B	8308907	8313049	ID=CQ004294-RA	Similar to At1g63850: BTB/POZ domain-containing protein At1g63850 (Arabidopsis thaliana OX%3D3702)
PC1	Cq5B	8293293	8303115	ID=CQ004293-RA	Protein of unknown function									n.6973369G>A	.	.	A|upstream_gene_variant|MODIFIER|CQ053345|CQ053345|transcript|CQ053345-RA|protein_coding||c.-1444G>A|||||1444|	A|intergenic_region|MODIFIER|CQ053344-CQ053345|CQ053344-CQ053345|intergenic_region|CQ053344-CQ053345|||n.6973369G>A||||||
PC1	Cq5B	8396997	8405972	ID=CQ004297-RA	Protein of unknown function									n.6974314G>A	.	.	A|upstream_gene_variant|MODIFIER|CQ053345|CQ053345|transcript|CQ053345-RA|protein_coding||c.-499G>A|||||499|	A|intergenic_region|MODIFIER|CQ053344-CQ053345|CQ053344-CQ053345|intergenic_region|CQ053344-CQ053345|||n.6974314G>A||||||
PC1	Cq5B	8390700	8391221	ID=CQ004296-RA	Similar to RHA1B: E3 ubiquitin-protein ligase RHA1B (Arabidopsis thaliana OX%3D3702)									n.6988555G>T	.	.	T|downstream_gene_variant|MODIFIER|CQ053346|CQ053346|transcript|CQ053346-RA|protein_coding||c.*2060C>A|||||1750|	T|intergenic_region|MODIFIER|CQ053345-CQ053346|CQ053345-CQ053346|intergenic_region|CQ053345-CQ053346|||n.6988555G>T||||||
PC1	Cq5B	34433268	34434621	ID=CQ005210-RA	Similar to FRS12: Protein FAR1-RELATED SEQUENCE 12 (Arabidopsis thaliana OX%3D3702)									c.-33A>G	.	.	C|5_prime_UTR_premature_start_codon_gain_variant|LOW|CQ053346|CQ053346|transcript|CQ053346-RA|protein_coding|1/3|c.-33A>G||||||	C|5_prime_UTR_variant|MODIFIER|CQ053346|CQ053346|transcript|CQ053346-RA|protein_coding|1/3|c.-33A>G|||||33|
PC1	Cq5B	34443718	34451023	ID=CQ005211-RA	Similar to ATJ13: Chaperone protein dnaJ 13 (Arabidopsis thaliana OX%3D3702)
PC1	Cq5B	34422822	34425550	ID=CQ005209-RA	Protein of unknown function
PC1	Cq5B	34499261	34505035	ID=CQ005213-RA	Similar to HINT4: Bifunctional adenosine 5'-phosphosulfate phosphorylase/adenylylsulfatase HINT4 (Arabidopsis thaliana OX%3D3702)
PC1	Cq5B	34510011	34511498	ID=CQ005214-RA	Similar to At4g16563: Probable aspartyl protease At4g16563 (Arabidopsis thaliana OX%3D3702)
PC1	Cq5B	34474674	34492051	ID=CQ005212-RA	Similar to PRMT16: Protein arginine N-methyltransferase 1.6 (Arabidopsis thaliana OX%3D3702)
PC1	Cq7B	21309217	21309459	ID=CQ008825-RA	Protein of unknown function
PC1	Cq7B	24565201	24567834	ID=CQ008907-RA	Similar to FRS6: Protein FAR1-RELATED SEQUENCE 6 (Arabidopsis thaliana OX%3D3702)
PC1	Cq7B	24545188	24547874	ID=CQ008906-RA	Protein of unknown function
PC1	Cq7B	24523779	24524507	ID=CQ008905-RA	Protein of unknown function
PC1	Cq7B	24597891	24599010	ID=CQ008908-RA	Protein of unknown function
PC1	Cq7B	24630158	24630400	ID=CQ008913-RA	Protein of unknown function
PC1	Cq7B	24617022	24628404	ID=CQ008912-RA	Similar to THO1: THO complex subunit 1 (Arabidopsis thaliana OX%3D3702)									n.7055388C>T	.	.	T|upstream_gene_variant|MODIFIER|CQ053348|CQ053348|transcript|CQ053348-RA|protein_coding||c.-4996C>T|||||4996|	T|intergenic_region|MODIFIER|CQ053347-CQ053348|CQ053347-CQ053348|intergenic_region|CQ053347-CQ053348|||n.7055388C>T||||||
PC1	Cq7B	24608920	24612505	ID=CQ008911-RA	Similar to THO1: THO complex subunit 1 (Arabidopsis thaliana OX%3D3702)									n.7060168G>A	.	.	A|upstream_gene_variant|MODIFIER|CQ053348|CQ053348|transcript|CQ053348-RA|protein_coding||c.-216G>A|||||216|	A|intergenic_region|MODIFIER|CQ053347-CQ053348|CQ053347-CQ053348|intergenic_region|CQ053347-CQ053348|||n.7060168G>A||||||
PC1	Cq7B	24599096	24600142	ID=CQ008909-RA	Protein of unknown function
PC1	Cq7B	24637175	24642696	ID=CQ008915-RA	Similar to TRM9: tRNA (carboxymethyluridine(34)-5-O)-methyltransferase (Arabidopsis thaliana OX%3D3702)
PC1	Cq7B	24603064	24606786	ID=CQ008910-RA	Protein of unknown function									MODIFIER	MODIFIER	MODIFIER	MODIFIER	MODIFIER	c.-939C>T	c.*4799G>A	c.*316C>T	c.*433C>T	n.7093949G>A	.	.	.	.	.	A|upstream_gene_variant|MODIFIER|CQ053350|CQ053350|transcript|CQ053350-RA|protein_coding||c.-939C>T|||||939|	A|downstream_gene_variant|MODIFIER|CQ053349|CQ053349|transcript|CQ053349-RA|protein_coding||c.*4799G>A|||||4799|	A|downstream_gene_variant|MODIFIER|CQ053351|CQ053351|transcript|CQ053351-RA|protein_coding||c.*316C>T|||||316|	A|downstream_gene_variant|MODIFIER|CQ053352|CQ053352|transcript|CQ053352-RA|protein_coding||c.*433C>T|||||433|	A|intergenic_region|MODIFIER|CQ053350-CQ053351|CQ053350-CQ053351|intergenic_region|CQ053350-CQ053351|||n.7093949G>A||||||
PC1	Cq7B	24632906	24633688	ID=CQ008914-RA	Similar to CPL4: RNA polymerase II C-terminal domain phosphatase-like 4 (Arabidopsis thaliana OX%3D3702)									MODIFIER	c.-4265G>A	c.*3302G>A	c.272+520G>A	.	.	.	T|upstream_gene_variant|MODIFIER|CQ053351|CQ053351|transcript|CQ053351-RA|protein_coding||c.-4265G>A|||||4265|	T|downstream_gene_variant|MODIFIER|CQ053353|CQ053353|transcript|CQ053353-RA|protein_coding||c.*3302G>A|||||3082|	T|intron_variant|MODIFIER|CQ053352|CQ053352|transcript|CQ053352-RA|protein_coding|3/3|c.272+520G>A||||||
PC1	Cq8B	49283209	49287847	ID=CQ011645-RA	Similar to At1g48405: Kinase-interacting family protein (Arabidopsis thaliana OX%3D3702)									MODIFIER	c.-4343T>C	c.*3224T>C	c.272+442T>C	.	.	.	G|upstream_gene_variant|MODIFIER|CQ053351|CQ053351|transcript|CQ053351-RA|protein_coding||c.-4343T>C|||||4343|	G|downstream_gene_variant|MODIFIER|CQ053353|CQ053353|transcript|CQ053353-RA|protein_coding||c.*3224T>C|||||3004|	G|intron_variant|MODIFIER|CQ053352|CQ053352|transcript|CQ053352-RA|protein_coding|3/3|c.272+442T>C||||||
PC1	Cq8B	49268067	49268849	ID=CQ011644-RA	Protein of unknown function									MODIFIER	c.-184G>C	c.*2189G>C	n.7099741C>G	.	.	.	G|upstream_gene_variant|MODIFIER|CQ053352|CQ053352|transcript|CQ053352-RA|protein_coding||c.-184G>C|||||184|	G|downstream_gene_variant|MODIFIER|CQ053353|CQ053353|transcript|CQ053353-RA|protein_coding||c.*2189G>C|||||1969|	G|intergenic_region|MODIFIER|CQ053352-CQ053353|CQ053352-CQ053353|intergenic_region|CQ053352-CQ053353|||n.7099741C>G||||||
PC1	Cq8B	49310811	49312655	ID=CQ011648-RA	Protein of unknown function									n.7105111A>T	.	.	T|upstream_gene_variant|MODIFIER|CQ053353|CQ053353|transcript|CQ053353-RA|protein_coding||c.-1484T>A|||||1213|	T|intergenic_region|MODIFIER|CQ053353-CQ053354|CQ053353-CQ053354|intergenic_region|CQ053353-CQ053354|||n.7105111A>T||||||
PC1	Cq8B	49296290	49299512	ID=CQ011647-RA	Protein of unknown function
PC1	Cq8B	49288588	49296750	ID=CQ011646-RA	Similar to AtMg00310: Uncharacterized mitochondrial protein AtMg00310 (Arabidopsis thaliana OX%3D3702)
PC1	Cq8B	49317396	49318166	ID=CQ011649-RA	Similar to FRS4: Protein FAR1-RELATED SEQUENCE 4 (Arabidopsis thaliana OX%3D3702)
PC1	Cq8B	58925067	58925579	ID=CQ011894-RA	Protein of unknown function									n.7143140C>A	.	.	A|downstream_gene_variant|MODIFIER|CQ053354|CQ053354|transcript|CQ053354-RA|protein_coding||c.*4467C>A|||||4233|	A|intergenic_region|MODIFIER|CQ053354-CQ053355|CQ053354-CQ053355|intergenic_region|CQ053354-CQ053355|||n.7143140C>A||||||
PC1	Cq8B	58944313	58964990	ID=CQ011895-RA	Similar to ASI1: Protein ANTI-SILENCING 1 (Arabidopsis thaliana OX%3D3702)
PC1	Cq8B	58908718	58912925	ID=CQ011893-RA	Similar to At4g33920: Probable protein phosphatase 2C 63 (Arabidopsis thaliana OX%3D3702)
PC1	Cq8B	58984078	58989853	ID=CQ011896-RA	Similar to PAP28: Probable inactive purple acid phosphatase 28 (Arabidopsis thaliana OX%3D3702)
PC1	Cq8B	58990814	59008198	ID=CQ011897-RA	Similar to TT9: Protein TRANSPARENT TESTA 9 (Arabidopsis thaliana OX%3D3702)
PC1	Cq8B	59024225	59024488	ID=CQ011898-RA	Protein of unknown function									MODIFIER	MODIFIER	MODIFIER	c.-2791T>C	c.*3017A>G	c.*3455A>G	n.7169354T>C	.	.	.	.	C|upstream_gene_variant|MODIFIER|CQ053355|CQ053355|transcript|CQ053355-RA|protein_coding||c.-2791T>C|||||2791|WARNING_TRANSCRIPT_MULTIPLE_STOP_CODONS	C|downstream_gene_variant|MODIFIER|CQ053356|CQ053356|transcript|CQ053356-RA|protein_coding||c.*3017A>G|||||3017|WARNING_TRANSCRIPT_MULTIPLE_STOP_CODONS	C|downstream_gene_variant|MODIFIER|CQ053357|CQ053357|transcript|CQ053357-RA|protein_coding||c.*3455A>G|||||3455|WARNING_TRANSCRIPT_NO_START_CODON	C|intergenic_region|MODIFIER|CQ053354-CQ053355|CQ053354-CQ053355|intergenic_region|CQ053354-CQ053355|||n.7169354T>C||||||
PC1	Cq8B	59576325	59585681	ID=CQ011910-RA	Similar to PIRL6: Plant intracellular Ras-group-related LRR protein 6 (Arabidopsis thaliana OX%3D3702)									MODIFIER	c.-1353G>A	c.*1579C>T	c.201+118G>A	.	.	.	T|upstream_gene_variant|MODIFIER|CQ053356|CQ053356|transcript|CQ053356-RA|protein_coding||c.-1353G>A|||||1353|WARNING_TRANSCRIPT_MULTIPLE_STOP_CODONS	T|downstream_gene_variant|MODIFIER|CQ053355|CQ053355|transcript|CQ053355-RA|protein_coding||c.*1579C>T|||||1579|WARNING_TRANSCRIPT_MULTIPLE_STOP_CODONS	T|intron_variant|MODIFIER|CQ053357|CQ053357|transcript|CQ053357-RA|protein_coding|2/3|c.201+118G>A||||||WARNING_TRANSCRIPT_NO_START_CODON
PC1	Cq8B	59610705	59618367	ID=CQ011911-RA	Similar to At4g29890: Choline monooxygenase%2C chloroplastic (Arabidopsis thaliana OX%3D3702)									MODIFIER	c.-3646C>T	c.*1380C>T	n.7177862G>A	.	.	.	A|upstream_gene_variant|MODIFIER|CQ053357|CQ053357|transcript|CQ053357-RA|protein_coding||c.-3646C>T|||||3646|WARNING_TRANSCRIPT_NO_START_CODON	A|downstream_gene_variant|MODIFIER|CQ053358|CQ053358|transcript|CQ053358-RA|protein_coding||c.*1380C>T|||||1380|	A|intergenic_region|MODIFIER|CQ053357-CQ053358|CQ053357-CQ053358|intergenic_region|CQ053357-CQ053358|||n.7177862G>A||||||
PC1	Cq8B	59640814	59641721	ID=CQ011912-RA	Protein of unknown function									MODIFIER	c.-1099T>C	c.*3471A>G	n.7192244T>C	.	.	.	C|upstream_gene_variant|MODIFIER|CQ053359|CQ053359|transcript|CQ053359-RA|protein_coding||c.-1099T>C|||||697|	C|downstream_gene_variant|MODIFIER|CQ053360|CQ053360|transcript|CQ053360-RA|protein_coding||c.*3471A>G|||||2965|	C|intergenic_region|MODIFIER|CQ053358-CQ053359|CQ053358-CQ053359|intergenic_region|CQ053358-CQ053359|||n.7192244T>C||||||
PC1	Cq8B	59657935	59660949	ID=CQ011914-RA	Protein of unknown function									MODIFIER	c.-1970G>T	c.*2240G>T	c.466-277C>A	.	.	.	A|upstream_gene_variant|MODIFIER|CQ053360|CQ053360|transcript|CQ053360-RA|protein_coding||c.-1970G>T|||||1970|	A|downstream_gene_variant|MODIFIER|CQ053361|CQ053361|transcript|CQ053361-RA|protein_coding||c.*2240G>T|||||2240|	A|intron_variant|MODIFIER|CQ053359|CQ053359|transcript|CQ053359-RA|protein_coding|1/1|c.466-277C>A||||||
PC1	Cq2B	841233	841607	ID=CQ013131-RA	Similar to SBT1.7: Subtilisin-like protease SBT1.7 (Arabidopsis thaliana OX%3D3702)									MODIFIER	c.-2071C>T	c.*2139C>T	c.466-176G>A	.	.	.	A|upstream_gene_variant|MODIFIER|CQ053360|CQ053360|transcript|CQ053360-RA|protein_coding||c.-2071C>T|||||2071|	A|downstream_gene_variant|MODIFIER|CQ053361|CQ053361|transcript|CQ053361-RA|protein_coding||c.*2139C>T|||||2139|	A|intron_variant|MODIFIER|CQ053359|CQ053359|transcript|CQ053359-RA|protein_coding|1/1|c.466-176G>A||||||
PC1	Cq2B	867568	867928	ID=CQ013132-RA	Protein of unknown function									MODIFIER	c.*2637G>T	c.*3336G>T	n.7286123C>A	.	.	.	A|downstream_gene_variant|MODIFIER|CQ053371|CQ053371|transcript|CQ053371-RA|protein_coding||c.*2637G>T|||||2637|	A|downstream_gene_variant|MODIFIER|CQ053372|CQ053372|transcript|CQ053372-RA|protein_coding||c.*3336G>T|||||3336|	A|intergenic_region|MODIFIER|CQ053370-CQ053371|CQ053370-CQ053371|intergenic_region|CQ053370-CQ053371|||n.7286123C>A||||||
PC1	Cq2B	910916	911344	ID=CQ013134-RA	Protein of unknown function									MODIFIER	c.*2584A>T	c.*3283A>T	n.7286176T>A	.	.	.	A|downstream_gene_variant|MODIFIER|CQ053371|CQ053371|transcript|CQ053371-RA|protein_coding||c.*2584A>T|||||2584|	A|downstream_gene_variant|MODIFIER|CQ053372|CQ053372|transcript|CQ053372-RA|protein_coding||c.*3283A>T|||||3283|	A|intergenic_region|MODIFIER|CQ053370-CQ053371|CQ053370-CQ053371|intergenic_region|CQ053370-CQ053371|||n.7286176T>A||||||
PC1	Cq2B	897866	898204	ID=CQ013133-RA	Protein of unknown function									c.*246T>A	p.Phe78Leu	.	T|missense_variant|MODERATE|CQ053371|CQ053371|transcript|CQ053371-RA|protein_coding|1/1|c.234T>A|p.Phe78Leu|234/687|234/687|78/228||	T|downstream_gene_variant|MODIFIER|CQ053372|CQ053372|transcript|CQ053372-RA|protein_coding||c.*246T>A|||||246|
PC1	Cq2B	19198534	19199237	ID=CQ014124-RA	Protein of unknown function									MODIFIER	c.*801T>C	c.*1645T>C	n.7323600A>G	.	.	.	G|downstream_gene_variant|MODIFIER|CQ053374|CQ053374|transcript|CQ053374-RA|protein_coding||c.*801T>C|||||801|	G|downstream_gene_variant|MODIFIER|CQ053375|CQ053375|transcript|CQ053375-RA|protein_coding||c.*1645T>C|||||1645|	G|intergenic_region|MODIFIER|CQ053373-CQ053374|CQ053373-CQ053374|intergenic_region|CQ053373-CQ053374|||n.7323600A>G||||||
PC1	Cq2B	19273443	19280504	ID=CQ014126-RA	Similar to ABCI19: ABC transporter I family member 19 (Arabidopsis thaliana OX%3D3702)
PC1	Cq2B	19251473	19252648	ID=CQ014125-RA	Protein of unknown function									n.7362204T>C	.	.	C|upstream_gene_variant|MODIFIER|CQ053378|CQ053378|transcript|CQ053378-RA|protein_coding||c.-1969A>G|||||1969|	C|intergenic_region|MODIFIER|CQ053378-CQ053379|CQ053378-CQ053379|intergenic_region|CQ053378-CQ053379|||n.7362204T>C||||||
PC1	Cq3B	1384108	1385901	ID=CQ016591-RA	Similar to TBL4: Protein trichome birefringence-like 4 (Arabidopsis thaliana OX%3D3702)
PC1	Cq3B	1344300	1349248	ID=CQ016585-RA	Protein of unknown function
PC1	Cq3B	1369064	1374017	ID=CQ016589-RA	Protein of unknown function
PC1	Cq3B	1342194	1343081	ID=CQ016584-RA	Protein of unknown function									n.7394829C>T	.	.	T|downstream_gene_variant|MODIFIER|CQ053379|CQ053379|transcript|CQ053379-RA|protein_coding||c.*3720G>A|||||3720|	T|intergenic_region|MODIFIER|CQ053378-CQ053379|CQ053378-CQ053379|intergenic_region|CQ053378-CQ053379|||n.7394829C>T||||||
PC1	Cq3B	1330290	1333593	ID=CQ016582-RA	Protein of unknown function									n.7395499A>G	.	.	G|downstream_gene_variant|MODIFIER|CQ053379|CQ053379|transcript|CQ053379-RA|protein_coding||c.*3050T>C|||||3050|	G|intergenic_region|MODIFIER|CQ053378-CQ053379|CQ053378-CQ053379|intergenic_region|CQ053378-CQ053379|||n.7395499A>G||||||
PC1	Cq3B	1360017	1365900	ID=CQ016587-RA	Similar to FRS11: Protein FAR1-RELATED SEQUENCE 11 (Arabidopsis thaliana OX%3D3702)									n.7396046T>G	.	.	G|downstream_gene_variant|MODIFIER|CQ053379|CQ053379|transcript|CQ053379-RA|protein_coding||c.*2503A>C|||||2503|	G|intergenic_region|MODIFIER|CQ053378-CQ053379|CQ053378-CQ053379|intergenic_region|CQ053378-CQ053379|||n.7396046T>G||||||
PC1	Cq3B	1335259	1341136	ID=CQ016583-RA	Similar to FRS11: Protein FAR1-RELATED SEQUENCE 11 (Arabidopsis thaliana OX%3D3702)									n.7397099A>G	.	.	G|downstream_gene_variant|MODIFIER|CQ053379|CQ053379|transcript|CQ053379-RA|protein_coding||c.*1450T>C|||||1450|	G|intergenic_region|MODIFIER|CQ053378-CQ053379|CQ053378-CQ053379|intergenic_region|CQ053378-CQ053379|||n.7397099A>G||||||
PC1	Cq3B	1322505	1328979	ID=CQ016581-RA	Similar to IMPA1: Importin subunit alpha-1 (Arabidopsis thaliana OX%3D3702)									n.7422950G>C	.	.	C|downstream_gene_variant|MODIFIER|CQ053382|CQ053382|transcript|CQ053382-RA|protein_coding||c.*2268C>G|||||1697|	C|intergenic_region|MODIFIER|CQ053381-CQ053382|CQ053381-CQ053382|intergenic_region|CQ053381-CQ053382|||n.7422950G>C||||||
PC1	Cq3B	1374132	1383096	ID=CQ016590-RA	Similar to AMSH3: AMSH-like ubiquitin thioesterase 3 (Arabidopsis thaliana OX%3D3702)
PC1	Cq3B	1349363	1358338	ID=CQ016586-RA	Similar to AMSH3: AMSH-like ubiquitin thioesterase 3 (Arabidopsis thaliana OX%3D3702)									MODIFIER	c.-593G>C	c.*768G>C	n.7432666C>G	.	.	.	G|upstream_gene_variant|MODIFIER|CQ053382|CQ053382|transcript|CQ053382-RA|protein_coding||c.-593G>C|||||166|	G|downstream_gene_variant|MODIFIER|CQ053383|CQ053383|transcript|CQ053383-RA|protein_coding||c.*768G>C|||||130|	G|intergenic_region|MODIFIER|CQ053382-CQ053383|CQ053382-CQ053383|intergenic_region|CQ053382-CQ053383|||n.7432666C>G||||||
PC1	Cq3B	1367071	1367480	ID=CQ016588-RA	Protein of unknown function									n.7449626C>G	.	.	G|upstream_gene_variant|MODIFIER|CQ053384|CQ053384|transcript|CQ053384-RA|protein_coding||c.-2878C>G|||||2317|	G|intergenic_region|MODIFIER|CQ053383-CQ053384|CQ053383-CQ053384|intergenic_region|CQ053383-CQ053384|||n.7449626C>G||||||
PC1	Cq3B	1420991	1422108	ID=CQ016597-RA	Similar to CYC2: Iridoid synthase CYC2 (Camptotheca acuminata OX%3D16922)									n.7449964A>G	.	.	G|upstream_gene_variant|MODIFIER|CQ053384|CQ053384|transcript|CQ053384-RA|protein_coding||c.-2540A>G|||||1979|	G|intergenic_region|MODIFIER|CQ053383-CQ053384|CQ053383-CQ053384|intergenic_region|CQ053383-CQ053384|||n.7449964A>G||||||
PC1	Cq3B	1411063	1412486	ID=CQ016595-RA	Similar to CEP1: KDEL-tailed cysteine endopeptidase CEP1 (Arabidopsis thaliana OX%3D3702)									MODIFIER	c.*5623C>A	c.*418C>A	n.7468564C>A	.	.	.	A|downstream_gene_variant|MODIFIER|CQ053384|CQ053384|transcript|CQ053384-RA|protein_coding||c.*5623C>A|||||4986|	A|downstream_gene_variant|MODIFIER|CQ053385|CQ053385|transcript|CQ053385-RA|protein_coding||c.*418C>A|||||259|	A|intergenic_region|MODIFIER|CQ053385-CQ053386|CQ053385-CQ053386|intergenic_region|CQ053385-CQ053386|||n.7468564C>A||||||
PC1	Cq3B	1387662	1390464	ID=CQ016592-RA	Protein of unknown function
PC1	Cq3B	1407106	1409479	ID=CQ016594-RA	Similar to TBL4: Protein trichome birefringence-like 4 (Arabidopsis thaliana OX%3D3702)									c.*2589A>G	p.Ile470Thr	.	C|missense_variant|MODERATE|CQ053387|CQ053387|transcript|CQ053387-RA|protein_coding|6/9|c.1409T>C|p.Ile470Thr|1529/3950|1409/2043|470/680||	C|downstream_gene_variant|MODIFIER|CQ053388|CQ053388|transcript|CQ053388-RA|protein_coding||c.*2589A>G|||||2337|
PC1	Cq3B	1412463	1419487	ID=CQ016596-RA	Similar to PPR40: Putative pentatricopeptide repeat-containing protein At3g16890%2C mitochondrial (Arabidopsis thaliana OX%3D3702)									MODIFIER	c.-5049C>T	c.*2976C>T	c.455-613G>A	.	.	.	A|upstream_gene_variant|MODIFIER|CQ053388|CQ053388|transcript|CQ053388-RA|protein_coding||c.-5049C>T|||||4844|	A|downstream_gene_variant|MODIFIER|CQ053390|CQ053390|transcript|CQ053390-RA|protein_coding||c.*2976C>T|||||2285|	A|intron_variant|MODIFIER|CQ053389|CQ053389|transcript|CQ053389-RA|protein_coding|2/4|c.455-613G>A||||||
PC1	Cq3B	1422308	1426968	ID=CQ016598-RA	Protein of unknown function									c.455-412A>G	.	.	G|downstream_gene_variant|MODIFIER|CQ053390|CQ053390|transcript|CQ053390-RA|protein_coding||c.*2775T>C|||||2084|	G|intron_variant|MODIFIER|CQ053389|CQ053389|transcript|CQ053389-RA|protein_coding|2/4|c.455-412A>G||||||
PC1	Cq3B	1392562	1395957	ID=CQ016593-RA	Similar to At2g40430: Ribosome biogenesis protein NOP53 (Arabidopsis thaliana OX%3D3702)									c.455-278G>T	.	.	T|downstream_gene_variant|MODIFIER|CQ053390|CQ053390|transcript|CQ053390-RA|protein_coding||c.*2641C>A|||||1950|	T|intron_variant|MODIFIER|CQ053389|CQ053389|transcript|CQ053389-RA|protein_coding|2/4|c.455-278G>T||||||
PC1	Cq3B	1561135	1582641	ID=CQ016608-RA	Similar to smek1: Serine/threonine-protein phosphatase 4 regulatory subunit 3 (Danio rerio OX%3D7955)									c.*2989T>C	p.Glu156Glu	.	C|synonymous_variant|LOW|CQ053390|CQ053390|transcript|CQ053390-RA|protein_coding|7/8|c.468A>G|p.Glu156Glu|868/2045|468/954|156/317||	C|downstream_gene_variant|MODIFIER|CQ053389|CQ053389|transcript|CQ053389-RA|protein_coding||c.*2989T>C|||||2517|
PC1	Cq3B	1590361	1592817	ID=CQ016609-RA	Similar to OEP162: Outer envelope pore protein 16-2%2C chloroplastic (Arabidopsis thaliana OX%3D3702)									c.211-105C>G	.	.	C|downstream_gene_variant|MODIFIER|CQ053389|CQ053389|transcript|CQ053389-RA|protein_coding||c.*3882G>C|||||3410|	C|intron_variant|MODIFIER|CQ053390|CQ053390|transcript|CQ053390-RA|protein_coding|4/7|c.211-105C>G||||||
PC1	Cq3B	1660595	1664759	ID=CQ016615-RA	Protein of unknown function									n.7522965C>G	.	.	G|upstream_gene_variant|MODIFIER|CQ053390|CQ053390|transcript|CQ053390-RA|protein_coding||c.-3624G>C|||||3224|	G|intergenic_region|MODIFIER|CQ053390-CQ053391|CQ053390-CQ053391|intergenic_region|CQ053390-CQ053391|||n.7522965C>G||||||
PC1	Cq3B	1615369	1618734	ID=CQ016611-RA	Similar to NRPB9A: DNA-directed RNA polymerases II%2C IV and V subunit 9A (Arabidopsis thaliana OX%3D3702)									n.7523047G>A	.	.	A|upstream_gene_variant|MODIFIER|CQ053390|CQ053390|transcript|CQ053390-RA|protein_coding||c.-3706C>T|||||3306|	A|intergenic_region|MODIFIER|CQ053390-CQ053391|CQ053390-CQ053391|intergenic_region|CQ053390-CQ053391|||n.7523047G>A||||||
PC1	Cq3B	1654726	1655421	ID=CQ016613-RA	Similar to ERF017: Ethylene-responsive transcription factor ERF017 (Arabidopsis thaliana OX%3D3702)									n.7523051A>G	.	.	G|upstream_gene_variant|MODIFIER|CQ053390|CQ053390|transcript|CQ053390-RA|protein_coding||c.-3710T>C|||||3310|	G|intergenic_region|MODIFIER|CQ053390-CQ053391|CQ053390-CQ053391|intergenic_region|CQ053390-CQ053391|||n.7523051A>G||||||
PC1	Cq3B	1672001	1672498	ID=CQ016616-RA	Similar to BZIP53: bZIP transcription factor 53 (Arabidopsis thaliana OX%3D3702)									n.7523281T>C	.	.	C|upstream_gene_variant|MODIFIER|CQ053390|CQ053390|transcript|CQ053390-RA|protein_coding||c.-3940A>G|||||3540|	C|intergenic_region|MODIFIER|CQ053390-CQ053391|CQ053390-CQ053391|intergenic_region|CQ053390-CQ053391|||n.7523281T>C||||||
PC1	Cq3B	1628423	1647032	ID=CQ016612-RA	Similar to Phip: PH-interacting protein (Mus musculus OX%3D10090)									n.7523592G>T	.	.	T|upstream_gene_variant|MODIFIER|CQ053390|CQ053390|transcript|CQ053390-RA|protein_coding||c.-4251C>A|||||3851|	T|intergenic_region|MODIFIER|CQ053390-CQ053391|CQ053390-CQ053391|intergenic_region|CQ053390-CQ053391|||n.7523592G>T||||||
PC1	Cq3B	1658372	1659914	ID=CQ016614-RA	Protein of unknown function									n.7524044T>C	.	.	C|upstream_gene_variant|MODIFIER|CQ053390|CQ053390|transcript|CQ053390-RA|protein_coding||c.-4703A>G|||||4303|	C|intergenic_region|MODIFIER|CQ053390-CQ053391|CQ053390-CQ053391|intergenic_region|CQ053390-CQ053391|||n.7524044T>C||||||
PC1	Cq3B	1611499	1613228	ID=CQ016610-RA	Similar to NRPB9B: DNA-directed RNA polymerases II%2C IV and V subunit 9B (Arabidopsis thaliana OX%3D3702)									n.7524409G>C	.	.	C|upstream_gene_variant|MODIFIER|CQ053390|CQ053390|transcript|CQ053390-RA|protein_coding||c.-5068C>G|||||4668|	C|intergenic_region|MODIFIER|CQ053390-CQ053391|CQ053390-CQ053391|intergenic_region|CQ053390-CQ053391|||n.7524409G>C||||||
PC1	Cq3B	65288333	65288931	ID=CQ019013-RA	Protein of unknown function
PC1	Cq3B	65305382	65310882	ID=CQ019016-RA	Similar to PIN3: Auxin efflux carrier component 3 (Arabidopsis thaliana OX%3D3702)
PC1	Cq3B	65285208	65288041	ID=CQ019012-RA	Similar to LST8-1: Target of rapamycin complex subunit LST8-1 (Arabidopsis thaliana OX%3D3702)
PC1	Cq3B	65293748	65296247	ID=CQ019015-RA	Similar to LST8: Target of rapamycin complex subunit LST8 (Oryza sativa subsp. japonica OX%3D39947)
PC1	Cq3B	65290012	65291566	ID=CQ019014-RA	Similar to LST8: Target of rapamycin complex subunit LST8 (Oryza sativa subsp. japonica OX%3D39947)									n.7537774A>C	.	.	C|downstream_gene_variant|MODIFIER|CQ053391|CQ053391|transcript|CQ053391-RA|protein_coding||c.*1034A>C|||||1034|	C|intergenic_region|MODIFIER|CQ053391-CQ053392|CQ053391-CQ053392|intergenic_region|CQ053391-CQ053392|||n.7537774A>C||||||
PC1	Cq3B	65349412	65350042	ID=CQ019017-RA	Protein of unknown function
PC1	Cq4B	3035839	3043063	ID=CQ019939-RA	Similar to SCAB1: Stomatal closure-related actin-binding protein 1 (Arabidopsis thaliana OX%3D3702)									n.7572066A>T	.	.	T|downstream_gene_variant|MODIFIER|CQ053392|CQ053392|transcript|CQ053392-RA|protein_coding||c.*2091T>A|||||1466|	T|intergenic_region|MODIFIER|CQ053391-CQ053392|CQ053391-CQ053392|intergenic_region|CQ053391-CQ053392|||n.7572066A>T||||||
PC1	Cq4B	3027218	3029635	ID=CQ019936-RA	Similar to PCMP-H8: Pentatricopeptide repeat-containing protein At1g18485 (Arabidopsis thaliana OX%3D3702)
PC1	Cq4B	3071502	3072120	ID=CQ019941-RA	Similar to MOCS2: Molybdopterin synthase catalytic subunit (Arabidopsis thaliana OX%3D3702)									n.7594264A>G	.	.	G|upstream_gene_variant|MODIFIER|CQ053392|CQ053392|transcript|CQ053392-RA|protein_coding||c.-3140T>C|||||2697|	G|intergenic_region|MODIFIER|CQ053392-CQ053393|CQ053392-CQ053393|intergenic_region|CQ053392-CQ053393|||n.7594264A>G||||||
PC1	Cq4B	3032793	3032978	ID=CQ019938-RA	Protein of unknown function									n.7595645A>G	.	.	G|upstream_gene_variant|MODIFIER|CQ053392|CQ053392|transcript|CQ053392-RA|protein_coding||c.-4521T>C|||||4078|	G|intergenic_region|MODIFIER|CQ053392-CQ053393|CQ053392-CQ053393|intergenic_region|CQ053392-CQ053393|||n.7595645A>G||||||
PC1	Cq4B	3028256	3034317	ID=CQ019937-RA	Protein of unknown function
PC1	Cq4B	3071346	3075911	ID=CQ019940-RA	Similar to G2/mitotic-specific cyclin S13-6 (Glycine max OX%3D3847)
PC1	Cq4B	3100871	3102139	ID=CQ019942-RA	Similar to At5g26960: F-box/kelch-repeat protein At5g26960 (Arabidopsis thaliana OX%3D3702)
PC1	Cq4B	3103356	3109534	ID=CQ019943-RA	Similar to eif2b3: Translation initiation factor eIF-2B subunit gamma (Dictyostelium discoideum OX%3D44689)
PC1	Cq4B	3112681	3118151	ID=CQ019944-RA	Similar to NFS2: Cysteine desulfurase 1%2C chloroplastic (Arabidopsis thaliana OX%3D3702)
PC1	Cq4B	66667335	66668024	ID=CQ022295-RA	Protein of unknown function
PC1	Cq4B	66643023	66647877	ID=CQ022291-RA	Protein of unknown function
PC1	Cq4B	66667074	66684862	ID=CQ022294-RA	Similar to At4g21880: Pentatricopeptide repeat-containing protein At4g21880%2C mitochondrial (Arabidopsis thaliana OX%3D3702)
PC1	Cq4B	66649254	66653626	ID=CQ022292-RA	Similar to ITN1: Ankyrin repeat-containing protein ITN1 (Arabidopsis thaliana OX%3D3702)
PC1	Cq4B	66655814	66665054	ID=CQ022293-RA	Similar to FIE2: Polycomb group protein FIE1 (Oryza sativa subsp. japonica OX%3D39947)
PC1	Cq4B	66687399	66688060	ID=CQ022297-RA	Protein of unknown function
PC1	Cq4B	66689863	66690246	ID=CQ022298-RA	Protein of unknown function
PC1	Cq4B	66727646	66729965	ID=CQ022301-RA	Protein of unknown function
PC1	Cq4B	66686081	66686734	ID=CQ022296-RA	Protein of unknown function
PC1	Cq4B	66719060	66719695	ID=CQ022300-RA	Similar to NDR1: Protein NDR1 (Arabidopsis thaliana OX%3D3702)
PC1	Cq4B	66690282	66691143	ID=CQ022299-RA	Similar to FRS8: Protein FAR1-RELATED SEQUENCE 8 (Arabidopsis thaliana OX%3D3702)									n.7711045A>G	.	.	G|upstream_gene_variant|MODIFIER|CQ053395|CQ053395|transcript|CQ053395-RA|protein_coding||c.-15782A>G|||||1484|	G|intergenic_region|MODIFIER|CQ053394-CQ053395|CQ053394-CQ053395|intergenic_region|CQ053394-CQ053395|||n.7711045A>G||||||
PC1	Cq6A	13876965	13877492	ID=CQ026315-RA	Similar to At3g55350: Protein ALP1-like (Arabidopsis thaliana OX%3D3702)									c.-4573T>G	.	.	G|5_prime_UTR_premature_start_codon_gain_variant|LOW|CQ053395|CQ053395|transcript|CQ053395-RA|protein_coding|4/19|c.-4573T>G||||||	G|5_prime_UTR_variant|MODIFIER|CQ053395|CQ053395|transcript|CQ053395-RA|protein_coding|4/19|c.-4573T>G|||||9259|
PC1	Cq6A	14046832	14048586	ID=CQ026318-RA	Similar to GLOX: Aldehyde oxidase GLOX (Vitis pseudoreticulata OX%3D231512)
PC1	Cq6A	13989681	13994662	ID=CQ026317-RA	Similar to TLP1: Protein TWIN LOV 1 (Arabidopsis thaliana OX%3D3702)
PC1	Cq6A	14051313	14056169	ID=CQ026319-RA	Protein of unknown function
PC1	Cq6A	13962391	13973908	ID=CQ026316-RA	Similar to NPF4.6: Protein NRT1/ PTR FAMILY 4.6 (Arabidopsis thaliana OX%3D3702)									n.7739550G>A	.	.	A|downstream_gene_variant|MODIFIER|CQ053396|CQ053396|transcript|CQ053396-RA|protein_coding||c.*1138G>A|||||686|	A|intergenic_region|MODIFIER|CQ053396-CQ053397|CQ053396-CQ053397|intergenic_region|CQ053396-CQ053397|||n.7739550G>A||||||
PC1	Cq6A	14059135	14060358	ID=CQ026320-RA	Protein of unknown function									n.7741646C>G	.	.	G|downstream_gene_variant|MODIFIER|CQ053396|CQ053396|transcript|CQ053396-RA|protein_coding||c.*3234C>G|||||2782|	G|intergenic_region|MODIFIER|CQ053396-CQ053397|CQ053396-CQ053397|intergenic_region|CQ053396-CQ053397|||n.7741646C>G||||||
PC1	Cq6A	14141499	14145653	ID=CQ026321-RA	Similar to NRPE1: DNA-directed RNA polymerase V subunit 1 (Arabidopsis thaliana OX%3D3702)									n.7741793A>G	.	.	G|downstream_gene_variant|MODIFIER|CQ053396|CQ053396|transcript|CQ053396-RA|protein_coding||c.*3381A>G|||||2929|	G|intergenic_region|MODIFIER|CQ053396-CQ053397|CQ053396-CQ053397|intergenic_region|CQ053396-CQ053397|||n.7741793A>G||||||
PC1	Cq6A	14170915	14179953	ID=CQ026322-RA	Similar to PIX7: Probable serine/threonine-protein kinase PIX7 (Arabidopsis thaliana OX%3D3702)
PC1	Cq6A	14181790	14187781	ID=CQ026323-RA	Protein of unknown function
PC1	Cq6A	14278592	14279207	ID=CQ026326-RA	Similar to PURA2: Adenylosuccinate synthetase 2%2C chloroplastic (Ricinus communis OX%3D3988)
PC1	Cq6A	14279789	14280086	ID=CQ026327-RA	Protein of unknown function									n.7759768A>G	.	.	G|upstream_gene_variant|MODIFIER|CQ053397|CQ053397|transcript|CQ053397-RA|protein_coding||c.-2920A>G|||||2848|	G|intergenic_region|MODIFIER|CQ053396-CQ053397|CQ053396-CQ053397|intergenic_region|CQ053396-CQ053397|||n.7759768A>G||||||
PC1	Cq6A	14204897	14206526	ID=CQ026324-RA	Similar to ndhD: NAD(P)H-quinone oxidoreductase chain 4%2C chloroplastic (Spinacia oleracea OX%3D3562)									c.265-451T>A	.	.	A|upstream_gene_variant|MODIFIER|CQ053398|CQ053398|transcript|CQ053398-RA|protein_coding||c.-1698T>A|||||1492|	A|intron_variant|MODIFIER|CQ053397|CQ053397|transcript|CQ053397-RA|protein_coding|2/3|c.265-451T>A||||||
PC1	Cq6A	14302823	14305434	ID=CQ026328-RA	Similar to Os03g0733400: Zinc finger BED domain-containing protein RICESLEEPER 2 (Oryza sativa subsp. japonica OX%3D39947)
PC1	Cq6A	65165040	65170356	ID=CQ028701-RA	Similar to FH6: Formin-like protein 6 (Arabidopsis thaliana OX%3D3702)
PC1	Cq6A	65154135	65167665	ID=CQ028700-RA	Similar to At1g11820: Glucan endo-1%2C3-beta-glucosidase 1 (Arabidopsis thaliana OX%3D3702)
PC1	Cq6A	65174654	65178956	ID=CQ028702-RA	Similar to BT4: BTB/POZ and TAZ domain-containing protein 4 (Arabidopsis thaliana OX%3D3702)
PC1	Cq6A	65187820	65190726	ID=CQ028703-RA	Similar to CYCD5-1: Cyclin-D5-1 (Arabidopsis thaliana OX%3D3702)									c.202-1107T>C	.	.	G|upstream_gene_variant|MODIFIER|CQ053403|CQ053403|transcript|CQ053403-RA|protein_coding||c.-4975A>G|||||4975|WARNING_TRANSCRIPT_MULTIPLE_STOP_CODONS	G|intron_variant|MODIFIER|CQ053402|CQ053402|transcript|CQ053402-RA|protein_coding|1/7|c.202-1107T>C||||||
PC1	Cq6A	65237289	65243242	ID=CQ028706-RA	Similar to ncapg2: Condensin-2 complex subunit G2 (Xenopus laevis OX%3D8355)									n.7844073A>G	.	.	G|downstream_gene_variant|MODIFIER|CQ053403|CQ053403|transcript|CQ053403-RA|protein_coding||c.*3793A>G|||||3793|WARNING_TRANSCRIPT_MULTIPLE_STOP_CODONS	G|intergenic_region|MODIFIER|CQ053403-CQ053404|CQ053403-CQ053404|intergenic_region|CQ053403-CQ053404|||n.7844073A>G||||||
PC1	Cq6A	65208424	65217446	ID=CQ028704-RA	Similar to DDB_G0284757: OTU domain-containing protein DDB_G0284757 (Dictyostelium discoideum OX%3D44689)
PC1	Cq6A	65242083	65249024	ID=CQ028707-RA	Similar to ACA2: Calcium-transporting ATPase 2%2C plasma membrane-type (Arabidopsis thaliana OX%3D3702)
PC1	Cq6A	65230796	65232714	ID=CQ028705-RA	Similar to At3g28410: Putative F-box/LRR-repeat protein At3g28410 (Arabidopsis thaliana OX%3D3702)
PC1	Cq6A	65634304	65635715	ID=CQ028736-RA	Similar to PSK3: Phytosulfokines 3 (Arabidopsis thaliana OX%3D3702)									n.8080505G>C	.	.	C|upstream_gene_variant|MODIFIER|CQ053413|CQ053413|transcript|CQ053413-RA|protein_coding||c.-2890C>G|||||2699|	C|intergenic_region|MODIFIER|CQ053413-CQ053414|CQ053413-CQ053414|intergenic_region|CQ053413-CQ053414|||n.8080505G>C||||||
PC1	Cq6A	65597318	65598658	ID=CQ028732-RA	Similar to PP2A10: Protein PHLOEM PROTEIN 2-LIKE A10 (Arabidopsis thaliana OX%3D3702)									n.8080510C>A	.	.	A|upstream_gene_variant|MODIFIER|CQ053413|CQ053413|transcript|CQ053413-RA|protein_coding||c.-2895G>T|||||2704|	A|intergenic_region|MODIFIER|CQ053413-CQ053414|CQ053413-CQ053414|intergenic_region|CQ053413-CQ053414|||n.8080510C>A||||||
PC1	Cq6A	65638665	65641343	ID=CQ028737-RA	Protein of unknown function									n.8080517G>A	.	.	A|upstream_gene_variant|MODIFIER|CQ053413|CQ053413|transcript|CQ053413-RA|protein_coding||c.-2902C>T|||||2711|	A|intergenic_region|MODIFIER|CQ053413-CQ053414|CQ053413-CQ053414|intergenic_region|CQ053413-CQ053414|||n.8080517G>A||||||
PC1	Cq6A	65624642	65625097	ID=CQ028735-RA	Protein of unknown function									n.8080536G>A	.	.	A|upstream_gene_variant|MODIFIER|CQ053413|CQ053413|transcript|CQ053413-RA|protein_coding||c.-2921C>T|||||2730|	A|intergenic_region|MODIFIER|CQ053413-CQ053414|CQ053413-CQ053414|intergenic_region|CQ053413-CQ053414|||n.8080536G>A||||||
PC1	Cq6A	65667644	65672132	ID=CQ028738-RA	Similar to GRF1: Growth-regulating factor 1 (Arabidopsis thaliana OX%3D3702)									n.8080642C>T	.	.	T|upstream_gene_variant|MODIFIER|CQ053413|CQ053413|transcript|CQ053413-RA|protein_coding||c.-3027G>A|||||2836|	T|intergenic_region|MODIFIER|CQ053413-CQ053414|CQ053413-CQ053414|intergenic_region|CQ053413-CQ053414|||n.8080642C>T||||||
PC1	Cq6A	65677339	65679153	ID=CQ028739-RA	Similar to PXC2: Leucine-rich repeat receptor-like protein kinase PXC2 (Arabidopsis thaliana OX%3D3702)									n.8080661A>G	.	.	G|upstream_gene_variant|MODIFIER|CQ053413|CQ053413|transcript|CQ053413-RA|protein_coding||c.-3046T>C|||||2855|	G|intergenic_region|MODIFIER|CQ053413-CQ053414|CQ053413-CQ053414|intergenic_region|CQ053413-CQ053414|||n.8080661A>G||||||
PC1	Cq6A	65602912	65603922	ID=CQ028733-RA	Similar to BZIP2: bZIP transcription factor 2 (Arabidopsis thaliana OX%3D3702)									n.8080689A>G	.	.	G|upstream_gene_variant|MODIFIER|CQ053413|CQ053413|transcript|CQ053413-RA|protein_coding||c.-3074T>C|||||2883|	G|intergenic_region|MODIFIER|CQ053413-CQ053414|CQ053413-CQ053414|intergenic_region|CQ053413-CQ053414|||n.8080689A>G||||||
PC1	Cq6A	65616783	65617706	ID=CQ028734-RA	Similar to Os03g0622100: B3 domain-containing protein Os03g0622100 (Oryza sativa subsp. japonica OX%3D39947)									n.8080691T>G	.	.	G|upstream_gene_variant|MODIFIER|CQ053413|CQ053413|transcript|CQ053413-RA|protein_coding||c.-3076A>C|||||2885|	G|intergenic_region|MODIFIER|CQ053413-CQ053414|CQ053413-CQ053414|intergenic_region|CQ053413-CQ053414|||n.8080691T>G||||||
PC1	Cq5A	8822341	8823438	ID=CQ029695-RA	Similar to At1g50680: AP2/ERF and B3 domain-containing transcription factor At1g50680 (Arabidopsis thaliana OX%3D3702)									n.8080697T>C	.	.	C|upstream_gene_variant|MODIFIER|CQ053413|CQ053413|transcript|CQ053413-RA|protein_coding||c.-3082A>G|||||2891|	C|intergenic_region|MODIFIER|CQ053413-CQ053414|CQ053413-CQ053414|intergenic_region|CQ053413-CQ053414|||n.8080697T>C||||||
PC1	Cq5A	8824729	8826126	ID=CQ029696-RA	Similar to At5g41330: BTB/POZ domain-containing protein At5g41330 (Arabidopsis thaliana OX%3D3702)									n.8080706A>G	.	.	G|upstream_gene_variant|MODIFIER|CQ053413|CQ053413|transcript|CQ053413-RA|protein_coding||c.-3091T>C|||||2900|	G|intergenic_region|MODIFIER|CQ053413-CQ053414|CQ053413-CQ053414|intergenic_region|CQ053413-CQ053414|||n.8080706A>G||||||
PC1	Cq5A	8816992	8820716	ID=CQ029694-RA	Similar to At1g76660: Uncharacterized protein At1g76660 (Arabidopsis thaliana OX%3D3702)									n.8080707A>C	.	.	C|upstream_gene_variant|MODIFIER|CQ053413|CQ053413|transcript|CQ053413-RA|protein_coding||c.-3092T>G|||||2901|	C|intergenic_region|MODIFIER|CQ053413-CQ053414|CQ053413-CQ053414|intergenic_region|CQ053413-CQ053414|||n.8080707A>C||||||
PC1	Cq5A	8798322	8805879	ID=CQ029693-RA	Similar to MPA1: Puromycin-sensitive aminopeptidase (Arabidopsis thaliana OX%3D3702)									n.8081365G>A	.	.	A|upstream_gene_variant|MODIFIER|CQ053413|CQ053413|transcript|CQ053413-RA|protein_coding||c.-3750C>T|||||3559|	A|intergenic_region|MODIFIER|CQ053413-CQ053414|CQ053413-CQ053414|intergenic_region|CQ053413-CQ053414|||n.8081365G>A||||||
PC1	Cq5A	8850069	8851649	ID=CQ029697-RA	Similar to CYP86A22: Cytochrome P450 86A22 (Petunia hybrida OX%3D4102)									n.8083242C>T	.	.	T|downstream_gene_variant|MODIFIER|CQ053414|CQ053414|transcript|CQ053414-RA|protein_coding||c.*3947G>A|||||3523|	T|intergenic_region|MODIFIER|CQ053413-CQ053414|CQ053413-CQ053414|intergenic_region|CQ053413-CQ053414|||n.8083242C>T||||||
PC1	Cq5A	8871739	8872324	ID=CQ029698-RA	Protein of unknown function
PC1	Cq5A	8878269	8887057	ID=CQ029699-RA	Similar to YDA: Mitogen-activated protein kinase kinase kinase YODA (Arabidopsis thaliana OX%3D3702)
PC1	Cq9B	11479525	11482394	ID=CQ033449-RA	Similar to AOP1.2: Probable 2-oxoglutarate-dependent dioxygenase AOP1.2 (Arabidopsis thaliana OX%3D3702)
PC1	Cq9B	11432459	11436816	ID=CQ033446-RA	Similar to IAA26: Auxin-responsive protein IAA26 (Arabidopsis thaliana OX%3D3702)
PC1	Cq9B	11446246	11448599	ID=CQ033447-RA	Similar to Putative AC transposase (Zea mays OX%3D4577)
PC1	Cq9B	11451549	11462061	ID=CQ033448-RA	Similar to At3g59200: F-box/LRR-repeat protein At3g59200 (Arabidopsis thaliana OX%3D3702)
PC1	Cq9B	54882968	54885380	ID=CQ034379-RA	Similar to PIP2-7: Aquaporin PIP2-7 (Zea mays OX%3D4577)
PC1	Cq9B	54958020	54959048	ID=CQ034381-RA	Protein of unknown function
PC1	Cq9B	54953815	54954000	ID=CQ034380-RA	Protein of unknown function
PC1	Cq9B	55036140	55036331	ID=CQ034382-RA	Protein of unknown function
PC1	Cq9B	55170883	55171407	ID=CQ034384-RA	Protein of unknown function
PC1	Cq9B	55228791	55230855	ID=CQ034386-RA	Protein of unknown function
PC1	Cq9B	55252384	55252641	ID=CQ034389-RA	Protein of unknown function
PC1	Cq9B	55232603	55235853	ID=CQ034387-RA	Protein of unknown function
PC1	Cq9B	55244597	55252878	ID=CQ034388-RA	Similar to REV: Homeobox-leucine zipper protein REVOLUTA (Arabidopsis thaliana OX%3D3702)
PC1	Cq9B	55209814	55216895	ID=CQ034385-RA	Similar to gba_locus_10451: CASP-like protein 5A1 (Ginkgo biloba OX%3D3311)
PC1	Cq9B	55342153	55342335	ID=CQ034393-RA	Protein of unknown function
PC1	Cq9B	55295951	55296930	ID=CQ034390-RA	Protein of unknown function
PC1	Cq9B	55340602	55357123	ID=CQ034392-RA	Similar to PPP6R3: Serine/threonine-protein phosphatase 6 regulatory subunit 3 (Gallus gallus OX%3D9031)
PC1	Cq9B	55332134	55337022	ID=CQ034391-RA	Similar to DRB2: Double-stranded RNA-binding protein 2 (Arabidopsis thaliana OX%3D3702)
PC1	Cq9B	55423218	55425097	ID=CQ034395-RA	Protein of unknown function
PC1	Cq9B	55459406	55459627	ID=CQ034396-RA	Similar to UBL5: Ubiquitin-like protein 5 (Arabidopsis thaliana OX%3D3702)
PC1	Cq9B	55462248	55476946	ID=CQ034397-RA	Similar to TPST: Protein-tyrosine sulfotransferase (Arabidopsis thaliana OX%3D3702)
PC1	Cq9B	55406619	55409215	ID=CQ034394-RA	Similar to Os03g0733400: Zinc finger BED domain-containing protein RICESLEEPER 2 (Oryza sativa subsp. japonica OX%3D39947)
PC1	Cq9B	55752634	55760866	ID=CQ034403-RA	Protein of unknown function
PC1	Cq9B	55779329	55779511	ID=CQ034404-RA	Protein of unknown function
PC1	Cq9B	55807310	55815248	ID=CQ034407-RA	Similar to BANGLUC: Glucan endo-1%2C3-beta-glucosidase (Musa acuminata OX%3D4641)
PC1	Cq4A	4010808	4012850	ID=CQ035359-RA	Similar to DRP4C: Dynamin-related protein 4C (Arabidopsis thaliana OX%3D3702)
PC1	Cq4A	4065472	4074840	ID=CQ035366-RA	Similar to PEL1: Protein PELOTA 1 (Arabidopsis thaliana OX%3D3702)
PC1	Cq4A	4085344	4087576	ID=CQ035369-RA	Protein of unknown function
PC1	Cq4A	4017193	4020307	ID=CQ035360-RA	Similar to WAKL8: Wall-associated receptor kinase-like 8 (Arabidopsis thaliana OX%3D3702)
PC1	Cq4A	4025181	4026843	ID=CQ035361-RA	Similar to CRLK1: Calcium/calmodulin-regulated receptor-like kinase 1 (Arabidopsis thaliana OX%3D3702)
PC1	Cq4A	4081070	4083212	ID=CQ035368-RA	Protein of unknown function
PC1	Cq4A	4051599	4062329	ID=CQ035362-RA	Similar to WAKL8: Wall-associated receptor kinase-like 8 (Arabidopsis thaliana OX%3D3702)
PC1	Cq4A	4076198	4076824	ID=CQ035367-RA	Protein of unknown function
PC1	Cq4A	4062450	4062864	ID=CQ035363-RA	Protein of unknown function
PC1	Cq4A	4102423	4103561	ID=CQ035372-RA	Similar to At4g13230: Uncharacterized protein At4g13230 (Arabidopsis thaliana OX%3D3702)
PC1	Cq4A	4090962	4095642	ID=CQ035370-RA	Protein of unknown function
PC1	Cq4A	4095834	4099396	ID=CQ035371-RA	Protein of unknown function
PC1	Cq4A	7865280	7870007	ID=CQ035776-RA	Similar to ppx: Exopolyphosphatase (Pseudomonas aeruginosa OX%3D287)
PC1	Cq4A	7846663	7855024	ID=CQ035775-RA	Similar to EXD3: Exonuclease mut-7 homolog (Homo sapiens OX%3D9606)
PC1	Cq4A	7826518	7837816	ID=CQ035773-RA	Similar to At1g12700: Putative pentatricopeptide repeat-containing protein At1g12700%2C mitochondrial (Arabidopsis thaliana OX%3D3702)
PC1	Cq4A	7842398	7845638	ID=CQ035774-RA	Protein of unknown function
PC1	Cq4A	7924154	7926926	ID=CQ035782-RA	Similar to CBP60B: Calmodulin-binding protein 60 B (Arabidopsis thaliana OX%3D3702)									n.8095642C>T	.	.	T|upstream_gene_variant|MODIFIER|CQ053414|CQ053414|transcript|CQ053414-RA|protein_coding||c.-1272G>A|||||1092|	T|intergenic_region|MODIFIER|CQ053414-CQ053415|CQ053414-CQ053415|intergenic_region|CQ053414-CQ053415|||n.8095642C>T||||||
PC1	Cq4A	7917387	7920556	ID=CQ035780-RA	Similar to CBP60B: Calmodulin-binding protein 60 B (Arabidopsis thaliana OX%3D3702)									n.8095650T>C	.	.	C|upstream_gene_variant|MODIFIER|CQ053414|CQ053414|transcript|CQ053414-RA|protein_coding||c.-1280A>G|||||1100|	C|intergenic_region|MODIFIER|CQ053414-CQ053415|CQ053414-CQ053415|intergenic_region|CQ053414-CQ053415|||n.8095650T>C||||||
PC1	Cq4A	7884671	7889652	ID=CQ035778-RA	Similar to CBP60D: Calmodulin-binding protein 60 D (Arabidopsis thaliana OX%3D3702)									n.8095656A>C	.	.	C|upstream_gene_variant|MODIFIER|CQ053414|CQ053414|transcript|CQ053414-RA|protein_coding||c.-1286T>G|||||1106|	C|intergenic_region|MODIFIER|CQ053414-CQ053415|CQ053414-CQ053415|intergenic_region|CQ053414-CQ053415|||n.8095656A>C||||||
PC1	Cq4A	7877411	7881857	ID=CQ035777-RA	Similar to CBP60D: Calmodulin-binding protein 60 D (Arabidopsis thaliana OX%3D3702)									n.8096468C>A	.	.	A|upstream_gene_variant|MODIFIER|CQ053414|CQ053414|transcript|CQ053414-RA|protein_coding||c.-2098G>T|||||1918|	A|intergenic_region|MODIFIER|CQ053414-CQ053415|CQ053414-CQ053415|intergenic_region|CQ053414-CQ053415|||n.8096468C>A||||||
PC1	Cq4A	7893848	7894891	ID=CQ035779-RA	Similar to CBP60C: Calmodulin-binding protein 60 C (Arabidopsis thaliana OX%3D3702)									n.8096902C>T	.	.	T|upstream_gene_variant|MODIFIER|CQ053414|CQ053414|transcript|CQ053414-RA|protein_coding||c.-2532G>A|||||2352|	T|intergenic_region|MODIFIER|CQ053414-CQ053415|CQ053414-CQ053415|intergenic_region|CQ053414-CQ053415|||n.8096902C>T||||||
PC1	Cq4A	7920567	7923547	ID=CQ035781-RA	Protein of unknown function									n.8097511T>C	.	.	C|upstream_gene_variant|MODIFIER|CQ053414|CQ053414|transcript|CQ053414-RA|protein_coding||c.-3141A>G|||||2961|	C|intergenic_region|MODIFIER|CQ053414-CQ053415|CQ053414-CQ053415|intergenic_region|CQ053414-CQ053415|||n.8097511T>C||||||
PC1	Cq4A	9185230	9187772	ID=CQ035900-RA	Protein of unknown function									n.8098058A>C	.	.	C|upstream_gene_variant|MODIFIER|CQ053414|CQ053414|transcript|CQ053414-RA|protein_coding||c.-3688T>G|||||3508|	C|intergenic_region|MODIFIER|CQ053414-CQ053415|CQ053414-CQ053415|intergenic_region|CQ053414-CQ053415|||n.8098058A>C||||||
PC1	Cq4A	9224324	9226640	ID=CQ035902-RA	Similar to SDS: Cyclin-SDS (Arabidopsis thaliana OX%3D3702)									n.8098368G>A	.	.	A|upstream_gene_variant|MODIFIER|CQ053414|CQ053414|transcript|CQ053414-RA|protein_coding||c.-3998C>T|||||3818|	A|intergenic_region|MODIFIER|CQ053414-CQ053415|CQ053414-CQ053415|intergenic_region|CQ053414-CQ053415|||n.8098368G>A||||||
PC1	Cq4A	9243649	9257061	ID=CQ035905-RA	Protein of unknown function									n.8099002T>C	.	.	C|upstream_gene_variant|MODIFIER|CQ053414|CQ053414|transcript|CQ053414-RA|protein_coding||c.-4632A>G|||||4452|	C|intergenic_region|MODIFIER|CQ053414-CQ053415|CQ053414-CQ053415|intergenic_region|CQ053414-CQ053415|||n.8099002T>C||||||
PC1	Cq4A	9234891	9240580	ID=CQ035904-RA	Similar to CUL1: Cullin-1 (Arabidopsis thaliana OX%3D3702)
PC1	Cq4A	9214971	9223331	ID=CQ035901-RA	Similar to CYCH1-1: Cyclin-H1-1 (Arabidopsis thaliana OX%3D3702)
PC1	Cq4A	9231556	9232377	ID=CQ035903-RA	Protein of unknown function
PC1	Cq4A	21529098	21529523	ID=CQ036434-RA	Similar to RPS17D: 40S ribosomal protein S17-4 (Arabidopsis thaliana OX%3D3702)
PC1	Cq4A	53582530	53584664	ID=CQ037458-RA	Similar to NAC072: NAC domain-containing protein 72 (Arabidopsis thaliana OX%3D3702)
PC1	Cq4A	53559169	53563611	ID=CQ037457-RA	Similar to ABCG9: ABC transporter G family member 9 (Arabidopsis thaliana OX%3D3702)
PC1	Cq4A	53528537	53535419	ID=CQ037455-RA	Similar to CIP7: COP1-interacting protein 7 (Arabidopsis thaliana OX%3D3702)
PC1	Cq4A	53549819	53554922	ID=CQ037456-RA	Similar to BGLU47: Beta-glucosidase 47 (Arabidopsis thaliana OX%3D3702)
PC1	Cq4A	53626893	53628560	ID=CQ037460-RA	Similar to Putative AC transposase (Zea mays OX%3D4577)
PC1	Cq4A	53692975	53696459	ID=CQ037466-RA	Similar to menG: Demethylmenaquinone methyltransferase (Lactobacillus johnsonii (strain CNCM I-12250 / La1 / NCC 533) OX%3D257314)
PC1	Cq4A	53753071	53761974	ID=CQ037469-RA	Similar to CYP37: Peptidyl-prolyl cis-trans isomerase CYP37%2C chloroplastic (Arabidopsis thaliana OX%3D3702)
PC1	Cq4A	53769604	53775024	ID=CQ037471-RA	Similar to PXMP2: Peroxisomal membrane protein 2 (Bos taurus OX%3D9913)
PC1	Cq4A	53761450	53762525	ID=CQ037470-RA	Protein of unknown function
PC1	Cq4A	53707939	53730401	ID=CQ037467-RA	Similar to TRS130: Trafficking protein particle complex II-specific subunit 130 homolog (Arabidopsis thaliana OX%3D3702)
PC1	Cq4A	53731043	53731447	ID=CQ037468-RA	Protein of unknown function
PC1	Cq4A	53776981	53777100	ID=CQ037472-RA	Protein of unknown function
PC1	Cq8A	35105145	35111060	ID=CQ039428-RA	Similar to BUB3.2: Mitotic checkpoint protein BUB3.2 (Arabidopsis thaliana OX%3D3702)
PC1	Cq8A	35144900	35145616	ID=CQ039431-RA	Similar to ZAT10: Zinc finger protein ZAT10 (Arabidopsis thaliana OX%3D3702)
PC1	Cq8A	35115546	35121041	ID=CQ039430-RA	Similar to CLPR1: ATP-dependent Clp protease proteolytic subunit-related protein 1%2C chloroplastic (Arabidopsis thaliana OX%3D3702)
PC1	Cq8A	35113326	35114078	ID=CQ039429-RA	Protein of unknown function
PC1	Cq8A	35150516	35150716	ID=CQ039432-RA	Protein of unknown function
PC1	Cq8A	35168618	35181376	ID=CQ039433-RA	Similar to PLPBP: Pyridoxal phosphate homeostasis protein (Bos taurus OX%3D9913)
PC1	Cq8A	35254998	35265918	ID=CQ039435-RA	Similar to rlmN1: Dual-specificity RNA methyltransferase RlmN 1 (Myxococcus xanthus (strain DK 1622) OX%3D246197)
PC1	Cq8A	35272052	35273368	ID=CQ039436-RA	Protein of unknown function
PC1	Cq8A	35182743	35183114	ID=CQ039434-RA	Protein of unknown function
PC1	Cq8A	35469845	35476449	ID=CQ039439-RA	Protein of unknown function
PC1	Cq8A	35457512	35460010	ID=CQ039438-RA	Protein of unknown function
PC1	Cq8A	35412485	35419207	ID=CQ039437-RA	Protein of unknown function
PC1	Cq8A	35510263	35518994	ID=CQ039440-RA	Protein of unknown function
PC1	Cq8A	35535826	35539519	ID=CQ039441-RA	Protein of unknown function
PC1	Cq8A	35951667	35955943	ID=CQ039452-RA	Similar to Triose phosphate/phosphate translocator%2C chloroplastic (Pisum sativum OX%3D3888)
PC1	Cq8A	35938828	35938977	ID=CQ039451-RA	Protein of unknown function
PC1	Cq8A	36117235	36130315	ID=CQ039462-RA	Similar to trm10: tRNA (guanine(9)-N1)-methyltransferase (Schizosaccharomyces pombe (strain 972 / ATCC 24843) OX%3D284812)
PC1	Cq8A	36132019	36141749	ID=CQ039463-RA	Similar to rplA: 50S ribosomal protein L1 (Rhodospirillum centenum (strain ATCC 51521 / SW) OX%3D414684)
PC1	Cq8A	36204220	36219074	ID=CQ039464-RA	Similar to MEFG2: Elongation factor G-2%2C mitochondrial (Arabidopsis thaliana OX%3D3702)
PC1	Cq8A	36264737	36278060	ID=CQ039466-RA	Protein of unknown function
PC1	Cq8A	36240156	36241007	ID=CQ039465-RA	Similar to SOT6: Cytosolic sulfotransferase 6 (Arabidopsis thaliana OX%3D3702)
PC1	Cq7A	30982749	30984182	ID=CQ042852-RA	Protein of unknown function
PC1	Cq7A	31038333	31044556	ID=CQ042854-RA	Similar to CRPK1: Cold-responsive protein kinase 1 (Arabidopsis thaliana OX%3D3702)
PC1	Cq7A	30984674	30990387	ID=CQ042853-RA	Similar to LOG2: Probable E3 ubiquitin-protein ligase LOG2 (Arabidopsis thaliana OX%3D3702)
PC1	Cq7A	49426436	49427980	ID=CQ043255-RA	Similar to Os03g0733400: Zinc finger BED domain-containing protein RICESLEEPER 2 (Oryza sativa subsp. japonica OX%3D39947)
PC1	Cq7A	49474868	49481243	ID=CQ043257-RA	Protein of unknown function
PC1	Cq7A	49412047	49420226	ID=CQ043253-RA	Similar to CSLA9: Glucomannan 4-beta-mannosyltransferase 9 (Arabidopsis thaliana OX%3D3702)
PC1	Cq7A	49435428	49437575	ID=CQ043256-RA	Similar to Os03g0733400: Zinc finger BED domain-containing protein RICESLEEPER 2 (Oryza sativa subsp. japonica OX%3D39947)
PC1	Cq7A	49422051	49422734	ID=CQ043254-RA	Similar to PRXIIE: Peroxiredoxin-2E%2C chloroplastic (Arabidopsis thaliana OX%3D3702)
PC1	Cq7A	49665090	49665784	ID=CQ043268-RA	Similar to Putative AC transposase (Zea mays OX%3D4577)
PC1	Cq7A	49705692	49717297	ID=CQ043269-RA	Similar to ROS1A: Protein ROS1A (Oryza sativa subsp. japonica OX%3D39947)
PC1	Cq7A	49717986	49719632	ID=CQ043270-RA	Similar to ROS1A: Protein ROS1A (Oryza sativa subsp. japonica OX%3D39947)
PC1	Cq3A	45161071	45165457	ID=CQ046077-RA	Similar to SCL30A: Serine/arginine-rich SC35-like splicing factor SCL30A (Arabidopsis thaliana OX%3D3702)
PC1	Cq3A	45123679	45132003	ID=CQ046076-RA	Similar to UTP6: U3 small nucleolar RNA-associated protein 6 homolog (Homo sapiens OX%3D9606)
PC1	Cq3A	45166637	45167297	ID=CQ046078-RA	Similar to RALF: Rapid alkalinization factor (Nicotiana tabacum OX%3D4097)
PC1	Cq3A	45219464	45220780	ID=CQ046083-RA	Similar to WTF9: Protein WHAT'S THIS FACTOR 9%2C mitochondrial (Arabidopsis thaliana OX%3D3702)
PC1	Cq3A	45199876	45203187	ID=CQ046080-RA	Protein of unknown function
PC1	Cq3A	45227553	45235527	ID=CQ046084-RA	Similar to RH37: DEAD-box ATP-dependent RNA helicase 37 (Arabidopsis thaliana OX%3D3702)
PC1	Cq3A	45210473	45210784	ID=CQ046082-RA	Similar to Histone H4 (Glycine max OX%3D3847)
PC1	Cq3A	45197612	45197872	ID=CQ046079-RA	Protein of unknown function
PC1	Cq3A	45208090	45208149	ID=CQ046081-RA	Protein of unknown function
PC1	Cq3A	45754690	45760489	ID=CQ046105-RA	Similar to HAT14: Homeobox-leucine zipper protein HAT14 (Arabidopsis thaliana OX%3D3702)
PC1	Cq3A	45749177	45750253	ID=CQ046104-RA	Protein of unknown function
PC1	Cq3A	46866180	46881365	ID=CQ046147-RA	Protein of unknown function
PC1	Cq3A	46804941	46805903	ID=CQ046146-RA	Protein of unknown function
PC1	Cq3A	47008485	47008792	ID=CQ046149-RA	Protein of unknown function
PC1	Cq3A	47155998	47156788	ID=CQ046150-RA	Protein of unknown function
PC1	Cq3A	47281557	47283371	ID=CQ046153-RA	Similar to RPL21A: 60S ribosomal protein L21-1 (Arabidopsis thaliana OX%3D3702)
PC1	Cq3A	47220985	47221548	ID=CQ046151-RA	Similar to DIR21: Dirigent protein 21 (Arabidopsis thaliana OX%3D3702)
PC1	Cq3A	47255721	47258992	ID=CQ046152-RA	Similar to DIR23: Dirigent protein 23 (Arabidopsis thaliana OX%3D3702)
PC1	Cq1A	12582866	12584023	ID=CQ048174-RA	Similar to ATL54: RING-H2 finger protein ATL54 (Arabidopsis thaliana OX%3D3702)
PC1	Cq1A	12626703	12630141	ID=CQ048176-RA	Protein of unknown function
PC1	Cq1A	12645503	12646779	ID=CQ048178-RA	Similar to Blue copper protein (Pisum sativum OX%3D3888)
PC1	Cq1A	12590063	12590380	ID=CQ048175-RA	Protein of unknown function
PC1	Cq1A	12630887	12643686	ID=CQ048177-RA	Similar to CP33: RNA-binding protein CP33%2C chloroplastic (Arabidopsis thaliana OX%3D3702)									n.8118388T>C	.	.	C|upstream_gene_variant|MODIFIER|CQ053415|CQ053415|transcript|CQ053415-RA|protein_coding||c.-4650T>C|||||4198|	C|intergenic_region|MODIFIER|CQ053414-CQ053415|CQ053414-CQ053415|intergenic_region|CQ053414-CQ053415|||n.8118388T>C||||||
PC1	Cq1A	12656496	12657114	ID=CQ048180-RA	Protein of unknown function									n.8120066T>C	.	.	C|upstream_gene_variant|MODIFIER|CQ053415|CQ053415|transcript|CQ053415-RA|protein_coding||c.-2972T>C|||||2520|	C|intergenic_region|MODIFIER|CQ053414-CQ053415|CQ053414-CQ053415|intergenic_region|CQ053414-CQ053415|||n.8120066T>C||||||
PC1	Cq1A	12657525	12658158	ID=CQ048182-RA	Protein of unknown function									n.8120797A>C	.	.	C|upstream_gene_variant|MODIFIER|CQ053415|CQ053415|transcript|CQ053415-RA|protein_coding||c.-2241A>C|||||1789|	C|intergenic_region|MODIFIER|CQ053414-CQ053415|CQ053414-CQ053415|intergenic_region|CQ053414-CQ053415|||n.8120797A>C||||||
PC1	Cq1A	12658702	12658940	ID=CQ048183-RA	Protein of unknown function									MODIFIER	c.*839G>A	c.*3452C>T	n.8133976G>A	.	.	.	A|downstream_gene_variant|MODIFIER|CQ053415|CQ053415|transcript|CQ053415-RA|protein_coding||c.*839G>A|||||464|	A|downstream_gene_variant|MODIFIER|CQ053417|CQ053417|transcript|CQ053417-RA|protein_coding||c.*3452C>T|||||3452|WARNING_TRANSCRIPT_INCOMPLETE	A|intergenic_region|MODIFIER|CQ053415-CQ053417|CQ053415-CQ053417|intergenic_region|CQ053415-CQ053417|||n.8133976G>A||||||
PC1	Cq1A	12650030	12650449	ID=CQ048179-RA	Protein of unknown function									c.*4318C>T	p.Arg15Lys	.	T|missense_variant|MODERATE|CQ053417|CQ053417|transcript|CQ053417-RA|protein_coding|1/1|c.44G>A|p.Arg15Lys|44/71|44/71|15/22||WARNING_TRANSCRIPT_INCOMPLETE	T|downstream_gene_variant|MODIFIER|CQ053415|CQ053415|transcript|CQ053415-RA|protein_coding||c.*4318C>T|||||3943|
PC1	Cq1A	12657137	12657482	ID=CQ048181-RA	Protein of unknown function									MODIFIER	c.-430C>T	c.*4791G>A	n.8137928G>A	.	.	.	A|upstream_gene_variant|MODIFIER|CQ053417|CQ053417|transcript|CQ053417-RA|protein_coding||c.-430C>T|||||430|WARNING_TRANSCRIPT_INCOMPLETE	A|downstream_gene_variant|MODIFIER|CQ053415|CQ053415|transcript|CQ053415-RA|protein_coding||c.*4791G>A|||||4416|	A|intergenic_region|MODIFIER|CQ053417-CQ053418|CQ053417-CQ053418|intergenic_region|CQ053417-CQ053418|||n.8137928G>A||||||
PC1	Cq9A	12835443	12837526	ID=CQ050518-RA	Protein of unknown function									n.8139292G>A	.	.	A|upstream_gene_variant|MODIFIER|CQ053417|CQ053417|transcript|CQ053417-RA|protein_coding||c.-1794C>T|||||1794|WARNING_TRANSCRIPT_INCOMPLETE	A|intergenic_region|MODIFIER|CQ053417-CQ053418|CQ053417-CQ053418|intergenic_region|CQ053417-CQ053418|||n.8139292G>A||||||
PC1	Cq9A	12869701	12870907	ID=CQ050519-RA	Similar to CINV2: Alkaline/neutral invertase CINV2 (Arabidopsis thaliana OX%3D3702)									n.8139322T>C	.	.	C|upstream_gene_variant|MODIFIER|CQ053417|CQ053417|transcript|CQ053417-RA|protein_coding||c.-1824A>G|||||1824|WARNING_TRANSCRIPT_INCOMPLETE	C|intergenic_region|MODIFIER|CQ053417-CQ053418|CQ053417-CQ053418|intergenic_region|CQ053417-CQ053418|||n.8139322T>C||||||
PC1	Cq9A	12834469	12834763	ID=CQ050517-RA	Protein of unknown function									n.8140192C>T	.	.	T|upstream_gene_variant|MODIFIER|CQ053417|CQ053417|transcript|CQ053417-RA|protein_coding||c.-2694G>A|||||2694|WARNING_TRANSCRIPT_INCOMPLETE	T|intergenic_region|MODIFIER|CQ053417-CQ053418|CQ053417-CQ053418|intergenic_region|CQ053417-CQ053418|||n.8140192C>T||||||
PC1	Cq9A	12911982	12928226	ID=CQ050521-RA	Similar to LARP1A: La-related protein 1A (Arabidopsis thaliana OX%3D3702)
PC1	Cq9A	12901190	12911381	ID=CQ050520-RA	Similar to AIR3: Subtilisin-like protease SBT5.3 (Arabidopsis thaliana OX%3D3702)
PC1	Cq9A	42367637	42371066	ID=CQ051421-RA	Protein of unknown function
PC1	Cq9A	42287642	42291747	ID=CQ051416-RA	Similar to At1g60420: Probable nucleoredoxin 1 (Arabidopsis thaliana OX%3D3702)
PC1	Cq9A	42304330	42308033	ID=CQ051418-RA	Similar to Vacuolar-processing enzyme (Citrus sinensis OX%3D2711)
PC1	Cq9A	42296440	42297594	ID=CQ051417-RA	Protein of unknown function									n.8153843C>A	.	.	A|upstream_gene_variant|MODIFIER|CQ053418|CQ053418|transcript|CQ053418-RA|protein_coding||c.-2567C>A|||||2567|	A|intergenic_region|MODIFIER|CQ053417-CQ053418|CQ053417-CQ053418|intergenic_region|CQ053417-CQ053418|||n.8153843C>A||||||
PC1	Cq9A	42367223	42367525	ID=CQ051420-RA	Protein of unknown function									n.8153878C>T	.	.	T|upstream_gene_variant|MODIFIER|CQ053418|CQ053418|transcript|CQ053418-RA|protein_coding||c.-2532C>T|||||2532|	T|intergenic_region|MODIFIER|CQ053417-CQ053418|CQ053417-CQ053418|intergenic_region|CQ053417-CQ053418|||n.8153878C>T||||||
PC1	Cq9A	42342355	42343755	ID=CQ051419-RA	Protein of unknown function
PC1	Cq2A	3219270	3222804	ID=CQ053049-RA	Similar to TLP1: Thaumatin-like protein 1 (Arabidopsis thaliana OX%3D3702)
PC1	Cq2A	3233640	3235957	ID=CQ053051-RA	Similar to At5g43822: Uncharacterized protein At5g43822 (Arabidopsis thaliana OX%3D3702)
PC1	Cq2A	3221194	3229333	ID=CQ053050-RA	Similar to BIN4: DNA-binding protein BIN4 (Arabidopsis thaliana OX%3D3702)
PC1	Cq2A	3256876	3277471	ID=CQ053052-RA	Similar to At3g47200: UPF0481 protein At3g47200 (Arabidopsis thaliana OX%3D3702)									n.8807067A>C	.	.	C|upstream_gene_variant|MODIFIER|CQ053451|CQ053451|transcript|CQ053451-RA|protein_coding||c.-3598T>G|||||3393|	C|intergenic_region|MODIFIER|CQ053451-CQ053452|CQ053451-CQ053452|intergenic_region|CQ053451-CQ053452|||n.8807067A>C||||||
PC1	Cq2A	3316502	3320999	ID=CQ053056-RA	Similar to OCP3: Protein OVEREXPRESSOR OF CATIONIC PEROXIDASE 3 (Arabidopsis thaliana OX%3D3702)
PC1	Cq2A	3321473	3335307	ID=CQ053057-RA	Similar to TFCE: Tubulin-folding cofactor E (Arabidopsis thaliana OX%3D3702)
PC1	Cq2A	3307448	3315643	ID=CQ053055-RA	Protein of unknown function
PC1	Cq2A	3295734	3300679	ID=CQ053053-RA	Similar to At3g47200: UPF0481 protein At3g47200 (Arabidopsis thaliana OX%3D3702)
PC1	Cq2A	3302849	3303586	ID=CQ053054-RA	Similar to At3g47200: UPF0481 protein At3g47200 (Arabidopsis thaliana OX%3D3702)									n.19163084A>G	.	.	G|downstream_gene_variant|MODIFIER|CQ053853|CQ053853|transcript|CQ053853-RA|protein_coding||c.*1731T>C|||||589|	G|intergenic_region|MODIFIER|CQ053852-CQ053853|CQ053852-CQ053853|intergenic_region|CQ053852-CQ053853|||n.19163084A>G||||||
PC1	Cq2A	3578862	3587107	ID=CQ053080-RA	Similar to XCC3184: Macro domain-containing protein XCC3184 (Xanthomonas campestris pv. campestris (strain ATCC 33913 / DSM 3586 / NCPPB 528 / LMG 568 / P 25) OX%3D190485)
PC1	Cq2A	3611056	3613112	ID=CQ053082-RA	Similar to EXPA4: Expansin-A4 (Oryza sativa subsp. japonica OX%3D39947)
PC1	Cq2A	3659153	3661376	ID=CQ053085-RA	Protein of unknown function
PC1	Cq2A	3638006	3655304	ID=CQ053084-RA	Similar to SNX13: Sorting nexin-13 (Homo sapiens OX%3D9606)
PC1	Cq2A	3616414	3623332	ID=CQ053083-RA	Similar to EXPA8: Expansin-A8 (Arabidopsis thaliana OX%3D3702)									n.35525531G>C	.	.	C|downstream_gene_variant|MODIFIER|CQ054247|CQ054247|transcript|CQ054247-RA|protein_coding||c.*2850G>C|||||2481|	C|intergenic_region|MODIFIER|CQ054247-CQ054248|CQ054247-CQ054248|intergenic_region|CQ054247-CQ054248|||n.35525531G>C||||||
PC1	Cq2A	3677904	3678107	ID=CQ053086-RA	Protein of unknown function
PC1	Cq2A	3779106	3779726	ID=CQ053091-RA	Similar to ATL73: RING-H2 finger protein ATL73 (Arabidopsis thaliana OX%3D3702)									MODIFIER	c.-4275A>C	c.-3940T>G	n.35725840T>G	.	.	.	G|upstream_gene_variant|MODIFIER|CQ054259|CQ054259|transcript|CQ054259-RA|protein_coding||c.-4275A>C|||||4275|	G|upstream_gene_variant|MODIFIER|CQ054260|CQ054260|transcript|CQ054260-RA|protein_coding||c.-3940T>G|||||3209|	G|intergenic_region|MODIFIER|CQ054259-CQ054260|CQ054259-CQ054260|intergenic_region|CQ054259-CQ054260|||n.35725840T>G||||||
PC1	Cq2A	3731391	3732229	ID=CQ053088-RA	Protein of unknown function
PC1	Cq2A	3762447	3764962	ID=CQ053090-RA	Similar to UBC25: Probable ubiquitin-conjugating enzyme E2 25 (Arabidopsis thaliana OX%3D3702)									c.870+119T>C	.	.	C|downstream_gene_variant|MODIFIER|CQ054261|CQ054261|transcript|CQ054261-RA|protein_coding||c.*2525A>G|||||1826|	C|intron_variant|MODIFIER|CQ054260|CQ054260|transcript|CQ054260-RA|protein_coding|11/13|c.870+119T>C||||||
PC1	Cq2A	3780251	3783492	ID=CQ053092-RA	Similar to CHI3: Probable chalcone--flavonone isomerase 3 (Arabidopsis thaliana OX%3D3702)
PC1	Cq2A	3732703	3735280	ID=CQ053089-RA	Similar to BZIP18: bZIP transcription factor 18 (Arabidopsis thaliana OX%3D3702)
PC1	Cq2A	3723246	3730555	ID=CQ053087-RA	Similar to LBD4: LOB domain-containing protein 4 (Arabidopsis thaliana OX%3D3702)
PC1	Cq2A	3870313	3875151	ID=CQ053099-RA	Similar to ARR17: Two-component response regulator ARR17 (Arabidopsis thaliana OX%3D3702)
PC1	Cq2A	3805402	3810616	ID=CQ053094-RA	Protein of unknown function
PC1	Cq2A	3880005	3886083	ID=CQ053101-RA	Protein of unknown function									n.35819227G>A	.	.	A|upstream_gene_variant|MODIFIER|CQ054263|CQ054263|transcript|CQ054263-RA|protein_coding||c.-1838C>T|||||1838|	A|intergenic_region|MODIFIER|CQ054263-CQ054264|CQ054263-CQ054264|intergenic_region|CQ054263-CQ054264|||n.35819227G>A||||||
PC1	Cq2A	3819036	3830812	ID=CQ053096-RA	Similar to PUB62: U-box domain-containing protein 62 (Arabidopsis thaliana OX%3D3702)
PC1	Cq2A	3846793	3855706	ID=CQ053098-RA	Similar to At4g13780: Methionine--tRNA ligase%2C cytoplasmic (Arabidopsis thaliana OX%3D3702)
PC1	Cq2A	3835908	3840583	ID=CQ053097-RA	Similar to IRK: Probable LRR receptor-like serine/threonine-protein kinase IRK (Arabidopsis thaliana OX%3D3702)
PC1	Cq2A	3879781	3879918	ID=CQ053100-RA	Protein of unknown function
PC1	Cq2A	4174217	4177025	ID=CQ053126-RA	Similar to MES17: Methylesterase 17 (Arabidopsis thaliana OX%3D3702)
PC1	Cq2A	4166527	4171312	ID=CQ053125-RA	Similar to MES17: Methylesterase 17 (Arabidopsis thaliana OX%3D3702)
PC1	Cq2A	4183618	4189386	ID=CQ053127-RA	Similar to MES17: Methylesterase 17 (Arabidopsis thaliana OX%3D3702)
PC1	Cq2A	4141231	4147481	ID=CQ053123-RA	Similar to EDR4: Protein ENHANCED DISEASE RESISTANCE 4 (Arabidopsis thaliana OX%3D3702)
PC1	Cq2A	4157449	4160680	ID=CQ053124-RA	Similar to NET4A: Protein NETWORKED 4A (Arabidopsis thaliana OX%3D3702)									c.*3409A>G	p.Met11Val	.	G|missense_variant|MODERATE|CQ035778|CQ035778|transcript|CQ035778-RA|protein_coding|1/5|c.31A>G|p.Met11Val|234/2229|31/1350|11/449||	G|downstream_gene_variant|MODIFIER|CQ035777|CQ035777|transcript|CQ035777-RA|protein_coding||c.*3409A>G|||||3047|
PC1	Cq2A	4282681	4284714	ID=CQ053139-RA	Similar to At5g39980: Pentatricopeptide repeat-containing protein At5g39980%2C chloroplastic (Arabidopsis thaliana OX%3D3702)
PC1	Cq2A	4217222	4220859	ID=CQ053129-RA	Similar to ATPK2: Serine/threonine-protein kinase AtPK2/AtPK19 (Arabidopsis thaliana OX%3D3702)
PC1	Cq2A	4270907	4271119	ID=CQ053138-RA	Protein of unknown function
PC1	Cq2A	4224820	4225268	ID=CQ053131-RA	Protein of unknown function									MODIFIER	c.-3910C>T	c.*2539G>A	n.53733986G>A	.	.	.	A|upstream_gene_variant|MODIFIER|CQ037467|CQ037467|transcript|CQ037467-RA|protein_coding||c.-3910C>T|||||3585|	A|downstream_gene_variant|MODIFIER|CQ037468|CQ037468|transcript|CQ037468-RA|protein_coding||c.*2539G>A|||||2539|	A|intergenic_region|MODIFIER|CQ037468-CQ037469|CQ037468-CQ037469|intergenic_region|CQ037468-CQ037469|||n.53733986G>A||||||
PC1	Cq2A	4241290	4248576	ID=CQ053133-RA	Similar to At5g58300: Probable inactive receptor kinase At5g58300 (Arabidopsis thaliana OX%3D3702)
PC1	Cq2A	4230819	4232552	ID=CQ053132-RA	Similar to TRX9: Thioredoxin H9 (Arabidopsis thaliana OX%3D3702)
PC1	Cq2A	4269786	4278482	ID=CQ053137-RA	Protein of unknown function
PC1	Cq2A	4189518	4193964	ID=CQ053128-RA	Similar to D4H: Deacetoxyvindoline 4-hydroxylase (Catharanthus roseus OX%3D4058)
PC1	Cq2A	4220746	4229578	ID=CQ053130-RA	Similar to EIF2B: Eukaryotic translation initiation factor 2 subunit beta (Arabidopsis thaliana OX%3D3702)
PC1	Cq2A	4255695	4256807	ID=CQ053134-RA	Similar to At2g39020: Probable acetyltransferase NATA1-like (Arabidopsis thaliana OX%3D3702)
PC1	Cq2A	4257086	4258119	ID=CQ053135-RA	Protein of unknown function
PC1	Cq2A	4259514	4260197	ID=CQ053136-RA	Protein of unknown function
PC1	Cq2A	4371397	4377448	ID=CQ053142-RA	Similar to EXPB2: Putative expansin-B2 (Arabidopsis thaliana OX%3D3702)
PC1	Cq2A	4447862	4459206	ID=CQ053148-RA	Similar to At3g28580: AAA-ATPase At3g28580 (Arabidopsis thaliana OX%3D3702)
PC1	Cq2A	4397434	4402126	ID=CQ053143-RA	Similar to At3g28580: AAA-ATPase At3g28580 (Arabidopsis thaliana OX%3D3702)									MODIFIER	c.-3743A>G	c.*1323T>C	n.14210269T>C	.	.	.	C|upstream_gene_variant|MODIFIER|CQ026324|CQ026324|transcript|CQ026324-RA|protein_coding||c.-3743A>G|||||3743|	C|downstream_gene_variant|MODIFIER|CQ026325|CQ026325|transcript|CQ026325-RA|protein_coding||c.*1323T>C|||||1323|WARNING_TRANSCRIPT_INCOMPLETE	C|intergenic_region|MODIFIER|CQ026325-CQ026326|CQ026325-CQ026326|intergenic_region|CQ026325-CQ026326|||n.14210269T>C||||||
PC1	Cq2A	4434540	4438528	ID=CQ053147-RA	Similar to At3g28580: AAA-ATPase At3g28580 (Arabidopsis thaliana OX%3D3702)
PC1	Cq2A	5627624	5629813	ID=CQ053253-RA	Similar to At3g14460: Putative disease resistance protein At3g14460 (Arabidopsis thaliana OX%3D3702)
PC1	Cq2A	5671122	5674016	ID=CQ053258-RA	Protein of unknown function
PC1	Cq2A	5680660	5684765	ID=CQ053260-RA	Similar to PIP5K6: Phosphatidylinositol 4-phosphate 5-kinase 6 (Arabidopsis thaliana OX%3D3702)
PC1	Cq2A	5631811	5633139	ID=CQ053255-RA	Protein of unknown function									MODIFIER	c.*433A>G	c.*1630A>G	n.14278159T>C	.	.	.	C|downstream_gene_variant|MODIFIER|CQ026326|CQ026326|transcript|CQ026326-RA|protein_coding||c.*433A>G|||||433|WARNING_TRANSCRIPT_NO_STOP_CODON	C|downstream_gene_variant|MODIFIER|CQ026327|CQ026327|transcript|CQ026327-RA|protein_coding||c.*1630A>G|||||1630|	C|intergenic_region|MODIFIER|CQ026325-CQ026326|CQ026325-CQ026326|intergenic_region|CQ026325-CQ026326|||n.14278159T>C||||||
PC1	Cq2A	5612129	5618335	ID=CQ053250-RA	Similar to AGD11: Probable ADP-ribosylation factor GTPase-activating protein AGD11 (Arabidopsis thaliana OX%3D3702)
PC1	Cq2A	5623604	5625049	ID=CQ053251-RA	Similar to At4g14490: FHA domain-containing protein At4g14490 (Arabidopsis thaliana OX%3D3702)
PC1	Cq2A	5631115	5639944	ID=CQ053254-RA	Similar to AED3: Aspartyl protease AED3 (Arabidopsis thaliana OX%3D3702)									n.65207547C>T	.	.	T|upstream_gene_variant|MODIFIER|CQ028704|CQ028704|transcript|CQ028704-RA|protein_coding||c.-4217C>T|||||877|	T|intergenic_region|MODIFIER|CQ028703-CQ028704|CQ028703-CQ028704|intergenic_region|CQ028703-CQ028704|||n.65207547C>T||||||
PC1	Cq2A	5599947	5604472	ID=CQ053249-RA	Similar to PYRE-F: Uridine 5'-monophosphate synthase (Arabidopsis thaliana OX%3D3702)									n.65643054C>T	.	.	T|downstream_gene_variant|MODIFIER|CQ028737|CQ028737|transcript|CQ028737-RA|protein_coding||c.*2387C>T|||||1711|	T|intergenic_region|MODIFIER|CQ028737-CQ028738|CQ028737-CQ028738|intergenic_region|CQ028737-CQ028738|||n.65643054C>T||||||
PC1	Cq2A	5658224	5664953	ID=CQ053256-RA	Similar to HPAT3: Hydroxyproline O-arabinosyltransferase 3 (Arabidopsis thaliana OX%3D3702)
PC1	Cq2A	5674770	5677592	ID=CQ053259-RA	Similar to NQR: NADPH:quinone oxidoreductase (Arabidopsis thaliana OX%3D3702)									n.49428147G>T	.	.	T|downstream_gene_variant|MODIFIER|CQ043255|CQ043255|transcript|CQ043255-RA|protein_coding||c.*167G>T|||||167|WARNING_TRANSCRIPT_NO_STOP_CODON	T|intergenic_region|MODIFIER|CQ043255-CQ043256|CQ043255-CQ043256|intergenic_region|CQ043255-CQ043256|||n.49428147G>T||||||
PC1	Cq2A	5665169	5670319	ID=CQ053257-RA	Similar to NQR: NADPH:quinone oxidoreductase (Arabidopsis thaliana OX%3D3702)
PC1	Cq2A	5626857	5627226	ID=CQ053252-RA	Protein of unknown function
PC1	Cq2A	5685831	5692203	ID=CQ053261-RA	Protein of unknown function
PC1	Cq2A	5770606	5777299	ID=CQ053264-RA	Similar to LAF3: Protein LONG AFTER FAR-RED 3 (Arabidopsis thaliana OX%3D3702)									MODIFIER	c.*3495C>T	c.*3655G>A	n.35269073C>T	.	.	.	T|downstream_gene_variant|MODIFIER|CQ039435|CQ039435|transcript|CQ039435-RA|protein_coding||c.*3495C>T|||||3155|	T|downstream_gene_variant|MODIFIER|CQ039436|CQ039436|transcript|CQ039436-RA|protein_coding||c.*3655G>A|||||2979|	T|intergenic_region|MODIFIER|CQ039435-CQ039436|CQ039435-CQ039436|intergenic_region|CQ039435-CQ039436|||n.35269073C>T||||||
PC1	Cq2A	5751375	5751946	ID=CQ053262-RA	Protein of unknown function
PC1	Cq2A	5753937	5754706	ID=CQ053263-RA	Protein of unknown function
PC1	Cq2A	5784522	5799109	ID=CQ053265-RA	Similar to lacZ: Beta-galactosidase (Photobacterium profundum (strain SS9) OX%3D298386)
PC1	Cq2A	6774118	6783643	ID=CQ053334-RA	Similar to PUS7: Multisubstrate pseudouridine synthase 7 (Saccharomyces cerevisiae (strain ATCC 204508 / S288c) OX%3D559292)
PC1	Cq2A	6739637	6741402	ID=CQ053328-RA	Similar to Os03g0708600: DEAD-box ATP-dependent RNA helicase 21 (Oryza sativa subsp. japonica OX%3D39947)
PC1	Cq2A	6742558	6743358	ID=CQ053329-RA	Similar to SOT15: Cytosolic sulfotransferase 15 (Arabidopsis thaliana OX%3D3702)
PC1	Cq2A	6759325	6764447	ID=CQ053331-RA	Similar to COX15: Cytochrome c oxidase assembly protein COX15 (Arabidopsis thaliana OX%3D3702)
PC1	Cq2A	6769066	6771755	ID=CQ053333-RA	Similar to MPH1: Protein MAINTENANCE OF PSII UNDER HIGH LIGHT 1 (Arabidopsis thaliana OX%3D3702)
PC1	Cq2A	6694507	6704561	ID=CQ053325-RA	Similar to RPPL1: Putative disease resistance RPP13-like protein 1 (Arabidopsis thaliana OX%3D3702)
PC1	Cq2A	6744375	6747851	ID=CQ053330-RA	Protein of unknown function
PC1	Cq2A	6762749	6766992	ID=CQ053332-RA	Protein of unknown function
PC1	Cq2A	6730596	6736588	ID=CQ053327-RA	Similar to RPPL1: Putative disease resistance RPP13-like protein 1 (Arabidopsis thaliana OX%3D3702)									c.1317+222A>C	.	.	G|downstream_gene_variant|MODIFIER|CQ016589|CQ016589|transcript|CQ016589-RA|protein_coding||c.*2409T>G|||||2240|	G|intron_variant|MODIFIER|CQ016590|CQ016590|transcript|CQ016590-RA|protein_coding|14/15|c.1317+222A>C||||||
PC1	Cq2A	6774525	6775727	ID=CQ053335-RA	Similar to KIN17: KIN17-like protein (Arabidopsis thaliana OX%3D3702)									n.1625507A>T	.	.	T|downstream_gene_variant|MODIFIER|CQ016612|CQ016612|transcript|CQ016612-RA|protein_coding||c.*3561T>A|||||2916|	T|intergenic_region|MODIFIER|CQ016611-CQ016612|CQ016611-CQ016612|intergenic_region|CQ016611-CQ016612|||n.1625507A>T||||||
PC1	Cq2A	6705593	6705595	ID=CQ053326-RA	Protein of unknown function
PC1	Cq2A	6810442	6811032	ID=CQ053338-RA	Similar to ATL69: Putative RING-H2 finger protein ATL69 (Arabidopsis thaliana OX%3D3702)
PC1	Cq2A	6822997	6830159	ID=CQ053340-RA	Similar to RGA1: Putative disease resistance protein RGA1 (Solanum bulbocastanum OX%3D147425)
PC1	Cq2A	6795785	6802415	ID=CQ053337-RA	Similar to chmp7: Charged multivesicular body protein 7 (Xenopus laevis OX%3D8355)
PC1	Cq2A	6785477	6791810	ID=CQ053336-RA	Similar to At1g74320: Probable choline kinase 2 (Arabidopsis thaliana OX%3D3702)									MODIFIER	c.-1398G>A	c.*2643C>T	n.3070104G>A	.	.	.	A|upstream_gene_variant|MODIFIER|CQ019941|CQ019941|transcript|CQ019941-RA|protein_coding||c.-1398G>A|||||1398|	A|downstream_gene_variant|MODIFIER|CQ019940|CQ019940|transcript|CQ019940-RA|protein_coding||c.*2643C>T|||||1242|	A|intergenic_region|MODIFIER|CQ019939-CQ019940|CQ019939-CQ019940|intergenic_region|CQ019939-CQ019940|||n.3070104G>A||||||
PC1	Cq2A	6813255	6817334	ID=CQ053339-RA	Similar to SOT14: Cytosolic sulfotransferase 14 (Arabidopsis thaliana OX%3D3702)									MODIFIER	c.-387G>A	c.-1342C>T	c.-2660C>T	.	.	.	T|5_prime_UTR_variant|MODIFIER|CQ022294|CQ022294|transcript|CQ022294-RA|protein_coding|1/16|c.-387G>A|||||387|	T|upstream_gene_variant|MODIFIER|CQ022296|CQ022296|transcript|CQ022296-RA|protein_coding||c.-1342C>T|||||1342|	T|upstream_gene_variant|MODIFIER|CQ022297|CQ022297|transcript|CQ022297-RA|protein_coding||c.-2660C>T|||||2660|WARNING_TRANSCRIPT_NO_START_CODON
PC1	Cq2A	6869315	6873073	ID=CQ053342-RA	Protein of unknown function									n.101698A>G	.	.	G|downstream_gene_variant|MODIFIER|CQ003474|CQ003474|transcript|CQ003474-RA|protein_coding||c.*3588A>G|||||3588|	G|intergenic_region|MODIFIER|CQ003474-CQ003475|CQ003474-CQ003475|intergenic_region|CQ003474-CQ003475|||n.101698A>G||||||
PC1	Cq2A	6845796	6848450	ID=CQ053341-RA	Similar to At5g58770: Dehydrodolichyl diphosphate synthase 2 (Arabidopsis thaliana OX%3D3702)									c.487-340A>G	.	.	G|downstream_gene_variant|MODIFIER|CQ003499|CQ003499|transcript|CQ003499-RA|protein_coding||c.*3223T>C|||||1972|	G|intron_variant|MODIFIER|CQ003498|CQ003498|transcript|CQ003498-RA|protein_coding|4/9|c.487-340A>G||||||
PC1	Cq2A	6945194	6947349	ID=CQ053343-RA	Similar to CYP71A6: Cytochrome P450 71A6 (Fragment) (Nepeta racemosa OX%3D54731)
PC1	Cq2A	6953101	6955548	ID=CQ053344-RA	Similar to uppS: Tritrans%2Cpolycis-undecaprenyl-diphosphate synthase (geranylgeranyl-diphosphate specific) (Methanothermobacter thermautotrophicus (strain ATCC 29096 / DSM 1053 / JCM 10044 / NBRC 100330 / Delta H) OX%3D187420)
PC1	Cq2A	6990305	6992966	ID=CQ053346-RA	Similar to At5g58770: Dehydrodolichyl diphosphate synthase 2 (Arabidopsis thaliana OX%3D3702)
PC1	Cq2A	7136706	7138907	ID=CQ053354-RA	Similar to CYP71A6: Cytochrome P450 71A6 (Fragment) (Nepeta racemosa OX%3D54731)									n.34472487T>A	.	.	A|downstream_gene_variant|MODIFIER|CQ005212|CQ005212|transcript|CQ005212-RA|protein_coding||c.*2423A>T|||||2187|	A|intergenic_region|MODIFIER|CQ005211-CQ005212|CQ005211-CQ005212|intergenic_region|CQ005211-CQ005212|||n.34472487T>A||||||
PC1	Cq2A	7088719	7089150	ID=CQ053349-RA	Similar to At5g58770: Dehydrodolichyl diphosphate synthase 2 (Arabidopsis thaliana OX%3D3702)
PC1	Cq2A	7047457	7047876	ID=CQ053347-RA	Similar to At5g58770: Dehydrodolichyl diphosphate synthase 2 (Arabidopsis thaliana OX%3D3702)
PC1	Cq2A	7060384	7061378	ID=CQ053348-RA	Similar to At5g58770: Dehydrodolichyl diphosphate synthase 2 (Arabidopsis thaliana OX%3D3702)									n.24551921C>T	.	.	T|upstream_gene_variant|MODIFIER|CQ008906|CQ008906|transcript|CQ008906-RA|protein_coding||c.-4244G>A|||||4047|	T|intergenic_region|MODIFIER|CQ008906-CQ008907|CQ008906-CQ008907|intergenic_region|CQ008906-CQ008907|||n.24551921C>T||||||
PC1	Cq2A	7101710	7103898	ID=CQ053353-RA	Similar to CYP71A4: Cytochrome P450 71A4 (Solanum melongena OX%3D4111)
PC1	Cq2A	7172809	7174216	ID=CQ053357-RA	Protein of unknown function
PC1	Cq2A	7091943	7093010	ID=CQ053350-RA	Similar to SOT5: Cytosolic sulfotransferase 5 (Arabidopsis thaliana OX%3D3702)
PC1	Cq2A	7094382	7099557	ID=CQ053352-RA	Similar to At5g58770: Dehydrodolichyl diphosphate synthase 2 (Arabidopsis thaliana OX%3D3702)
PC1	Cq2A	6974813	6975434	ID=CQ053345-RA	Protein of unknown function									n.24561219G>A	.	.	A|upstream_gene_variant|MODIFIER|CQ008907|CQ008907|transcript|CQ008907-RA|protein_coding||c.-3982G>A|||||3982|	A|intergenic_region|MODIFIER|CQ008906-CQ008907|CQ008906-CQ008907|intergenic_region|CQ008906-CQ008907|||n.24561219G>A||||||
PC1	Cq2A	7094265	7094363	ID=CQ053351-RA	Protein of unknown function									n.24565101A>T	.	.	T|upstream_gene_variant|MODIFIER|CQ008907|CQ008907|transcript|CQ008907-RA|protein_coding||c.-100A>T|||||100|	T|intergenic_region|MODIFIER|CQ008906-CQ008907|CQ008906-CQ008907|intergenic_region|CQ008906-CQ008907|||n.24565101A>T||||||
PC1	Cq2A	7192941	7199810	ID=CQ053359-RA	Protein of unknown function									n.24569568A>C	.	.	C|downstream_gene_variant|MODIFIER|CQ008907|CQ008907|transcript|CQ008907-RA|protein_coding||c.*1734A>C|||||1734|	C|intergenic_region|MODIFIER|CQ008907-CQ008908|CQ008907-CQ008908|intergenic_region|CQ008907-CQ008908|||n.24569568A>C||||||
PC1	Cq2A	7215563	7217873	ID=CQ053363-RA	Similar to At5g58770: Dehydrodolichyl diphosphate synthase 2 (Arabidopsis thaliana OX%3D3702)
PC1	Cq2A	7195209	7196928	ID=CQ053360-RA	Protein of unknown function
PC1	Cq2A	7211112	7212134	ID=CQ053362-RA	Similar to SOT15: Cytosolic sulfotransferase 15 (Arabidopsis thaliana OX%3D3702)
PC1	Cq2A	7277125	7277418	ID=CQ053369-RA	Similar to RAB11D: Ras-related protein Rab11D (Lotus japonicus OX%3D34305)									n.24594006G>A	.	.	A|upstream_gene_variant|MODIFIER|CQ008908|CQ008908|transcript|CQ008908-RA|protein_coding||c.-3885G>A|||||3885|	A|intergenic_region|MODIFIER|CQ008907-CQ008908|CQ008907-CQ008908|intergenic_region|CQ008907-CQ008908|||n.24594006G>A||||||
PC1	Cq2A	7230529	7230852	ID=CQ053367-RA	Protein of unknown function
PC1	Cq2A	7179242	7186484	ID=CQ053358-RA	Similar to CBL1: Calcineurin B-like protein 1 (Arabidopsis thaliana OX%3D3702)
PC1	Cq2A	7235540	7236265	ID=CQ053368-RA	Similar to COX1: Cytochrome c oxidase subunit 1 (Oryza sativa subsp. japonica OX%3D39947)
PC1	Cq2A	7201138	7201539	ID=CQ053361-RA	Similar to SOT12: Cytosolic sulfotransferase 12 (Arabidopsis thaliana OX%3D3702)									n.59025351A>G	.	.	G|downstream_gene_variant|MODIFIER|CQ011898|CQ011898|transcript|CQ011898-RA|protein_coding||c.*863A>G|||||863|	G|intergenic_region|MODIFIER|CQ011898-CQ011899|CQ011898-CQ011899|intergenic_region|CQ011898-CQ011899|||n.59025351A>G||||||
PC1	Cq2A	7278235	7278378	ID=CQ053370-RA	Similar to Cytochrome P450 CYP72A219 (Panax ginseng OX%3D4054)									n.59622032A>G	.	.	G|downstream_gene_variant|MODIFIER|CQ011911|CQ011911|transcript|CQ011911-RA|protein_coding||c.*7131A>G|||||3665|	G|intergenic_region|MODIFIER|CQ011911-CQ011912|CQ011911-CQ011912|intergenic_region|CQ011911-CQ011912|||n.59622032A>G||||||
PC1	Cq2A	7325245	7326285	ID=CQ053375-RA	Similar to SOT5: Cytosolic sulfotransferase 5 (Arabidopsis thaliana OX%3D3702)									n.11443528G>A	.	.	A|upstream_gene_variant|MODIFIER|CQ033447|CQ033447|transcript|CQ033447-RA|protein_coding||c.-3914G>A|||||2718|	A|intergenic_region|MODIFIER|CQ033446-CQ033447|CQ033446-CQ033447|intergenic_region|CQ033446-CQ033447|||n.11443528G>A||||||
PC1	Cq2A	7354365	7360235	ID=CQ053378-RA	Protein of unknown function
PC1	Cq2A	7343966	7344646	ID=CQ053377-RA	Similar to SOT15: Cytosolic sulfotransferase 15 (Arabidopsis thaliana OX%3D3702)
PC1	Cq2A	7288760	7289446	ID=CQ053371-RA	Similar to SOT15: Cytosolic sulfotransferase 15 (Arabidopsis thaliana OX%3D3702)
PC1	Cq2A	7289459	7291706	ID=CQ053372-RA	Similar to SOT5: Cytosolic sulfotransferase 5 (Arabidopsis thaliana OX%3D3702)
PC1	Cq2A	7314416	7314991	ID=CQ053373-RA	Similar to SOT15: Cytosolic sulfotransferase 15 (Arabidopsis thaliana OX%3D3702)
PC1	Cq2A	7330486	7331127	ID=CQ053376-RA	Similar to SOT4: Cytosolic sulfotransferase 4 (Arabidopsis thaliana OX%3D3702)
PC1	Cq2A	7324401	7325166	ID=CQ053374-RA	Protein of unknown function
PC1	Cq2A	7465030	7468305	ID=CQ053385-RA	Similar to CYP98A2: Cytochrome P450 98A2 (Glycine max OX%3D3847)									n.55425561G>T	.	.	T|downstream_gene_variant|MODIFIER|CQ034395|CQ034395|transcript|CQ034395-RA|protein_coding||c.*464G>T|||||464|	T|intergenic_region|MODIFIER|CQ034395-CQ034396|CQ034395-CQ034396|intergenic_region|CQ034395-CQ034396|||n.55425561G>T||||||
PC1	Cq2A	7451943	7463578	ID=CQ053384-RA	Similar to Cyp4d2: Cytochrome P450 4d2 (Drosophila melanogaster OX%3D7227)
PC1	Cq2A	7414867	7415877	ID=CQ053381-RA	Similar to CXE6: Probable carboxylesterase 6 (Arabidopsis thaliana OX%3D3702)
PC1	Cq2A	7424647	7432500	ID=CQ053382-RA	Similar to MAP65-5: 65-kDa microtubule-associated protein 5 (Arabidopsis thaliana OX%3D3702)
PC1	Cq2A	7432796	7439523	ID=CQ053383-RA	Similar to PBC1: Proteasome subunit beta type-3-A (Arabidopsis thaliana OX%3D3702)									c.343-309G>A	.	.	A|upstream_gene_variant|MODIFIER|CQ051475|CQ051475|transcript|CQ051475-RA|protein_coding||c.-5059C>T|||||4506|	A|intron_variant|MODIFIER|CQ051476|CQ051476|transcript|CQ051476-RA|protein_coding|1/1|c.343-309G>A||||||
PC1	Cq2A	7398549	7403957	ID=CQ053379-RA	Similar to SOT6: Cytosolic sulfotransferase 6 (Arabidopsis thaliana OX%3D3702)
PC1	Cq2A	7404199	7404633	ID=CQ053380-RA	Similar to SOT13: Cytosolic sulfotransferase 13 (Arabidopsis thaliana OX%3D3702)
PC1	Cq2A	7495566	7502740	ID=CQ053387-RA	Similar to PRMT3: Probable protein arginine N-methyltransferase 3 (Oryza sativa subsp. japonica OX%3D39947)
PC1	Cq2A	7507489	7511831	ID=CQ053389-RA	Similar to CYS6: Cysteine proteinase inhibitor 6 (Arabidopsis thaliana OX%3D3702)
PC1	Cq2A	7482181	7486293	ID=CQ053386-RA	Protein of unknown function
PC1	Cq2A	7501606	7505171	ID=CQ053388-RA	Similar to FH20: Formin-like protein 20 (Arabidopsis thaliana OX%3D3702)									n.68830056C>T	.	.	T|downstream_gene_variant|MODIFIER|CQ006034|CQ006034|transcript|CQ006034-RA|protein_coding||c.*6018G>A|||||4751|	T|intergenic_region|MODIFIER|CQ006033-CQ006034|CQ006033-CQ006034|intergenic_region|CQ006033-CQ006034|||n.68830056C>T||||||
PC1	Cq2A	7512300	7519741	ID=CQ053390-RA	Similar to Drap1: Dr1-associated corepressor (Rattus norvegicus OX%3D10116)									n.68830060C>T	.	.	T|downstream_gene_variant|MODIFIER|CQ006034|CQ006034|transcript|CQ006034-RA|protein_coding||c.*6014G>A|||||4747|	T|intergenic_region|MODIFIER|CQ006033-CQ006034|CQ006033-CQ006034|intergenic_region|CQ006033-CQ006034|||n.68830060C>T||||||
PC1	Cq2A	7536330	7536740	ID=CQ053391-RA	Similar to ZFP1: Zinc finger protein 1 (Arabidopsis thaliana OX%3D3702)
PC1	Cq2A	7602717	7609003	ID=CQ053393-RA	Similar to MED15A: Mediator of RNA polymerase II transcription subunit 15a (Arabidopsis thaliana OX%3D3702)
PC1	Cq2A	7573532	7591567	ID=CQ053392-RA	Protein of unknown function
PC1	Cq2A	7632020	7635799	ID=CQ053394-RA	Similar to VTE5: Phytol kinase 1%2C chloroplastic (Arabidopsis thaliana OX%3D3702)
PC1	Cq2A	7712529	7732371	ID=CQ053395-RA	Similar to eda: 2-dehydro-3-deoxy-phosphogluconate aldolase (Pseudomonas aeruginosa (strain ATCC 15692 / DSM 22644 / CIP 104116 / JCM 14847 / LMG 12228 / 1C / PRS 101 / PAO1) OX%3D208964)
PC1	Cq2A	7734794	7738864	ID=CQ053396-RA	Protein of unknown function
PC1	Cq2A	7765489	7775065	ID=CQ053398-RA	Similar to Smyd4: SET and MYND domain-containing protein 4 (Mus musculus OX%3D10090)
PC1	Cq2A	7762616	7764602	ID=CQ053397-RA	Protein of unknown function
PC1	Cq2A	7775234	7781428	ID=CQ053399-RA	Similar to CIP7: COP1-interacting protein 7 (Arabidopsis thaliana OX%3D3702)
PC1	Cq2A	7825371	7829542	ID=CQ053401-RA	Similar to At3g22470: Pentatricopeptide repeat-containing protein At3g22470%2C mitochondrial (Arabidopsis thaliana OX%3D3702)
PC1	Cq2A	7849299	7849563	ID=CQ053404-RA	Protein of unknown function
PC1	Cq2A	7812092	7823782	ID=CQ053400-RA	Protein of unknown function
PC1	Cq2A	7830882	7838564	ID=CQ053402-RA	Protein of unknown function
PC1	Cq2A	7879501	7889574	ID=CQ053405-RA	Similar to CYP714A1: Cytochrome P450 714A1 (Arabidopsis thaliana OX%3D3702)
PC1	Cq2A	7945509	7971215	ID=CQ053409-RA	Similar to At5g23430: Katanin p80 WD40 repeat-containing subunit B1 homolog (Arabidopsis thaliana OX%3D3702)
PC1	Cq2A	7889428	7894486	ID=CQ053406-RA	Similar to yugF: Uncharacterized hydrolase YugF (Bacillus subtilis (strain 168) OX%3D224308)
PC1	Cq2A	7971307	7971537	ID=CQ053410-RA	Protein of unknown function
PC1	Cq2A	8059648	8063024	ID=CQ053411-RA	Similar to ATG18D: Autophagy-related protein 18d (Arabidopsis thaliana OX%3D3702)
PC1	Cq2A	8064256	8065876	ID=CQ053412-RA	Similar to ATG18C: Autophagy-related protein 18c (Arabidopsis thaliana OX%3D3702)
PC1	Cq2A	8076143	8077806	ID=CQ053413-RA	Protein of unknown function
PC1	Cq2A	8184007	8185937	ID=CQ053419-RA	Similar to XTH23: Probable xyloglucan endotransglucosylase/hydrolase protein 23 (Arabidopsis thaliana OX%3D3702)
PC1	Cq2A	8122586	8133512	ID=CQ053415-RA	Protein of unknown function
PC1	Cq2A	8156410	8172793	ID=CQ053418-RA	Protein of unknown function
PC1	Cq2A	8187151	8187778	ID=CQ053420-RA	Similar to XTH23: Probable xyloglucan endotransglucosylase/hydrolase protein 23 (Arabidopsis thaliana OX%3D3702)
PC1	Cq2A	8086765	8094550	ID=CQ053414-RA	Similar to GLX2-2: Hydroxyacylglutathione hydrolase cytoplasmic (Arabidopsis thaliana OX%3D3702)
PC1	Cq2A	8197694	8208815	ID=CQ053422-RA	Similar to ytfP: Uncharacterized protein YtfP (Bacillus subtilis (strain 168) OX%3D224308)
PC1	Cq2A	8191736	8198778	ID=CQ053421-RA	Protein of unknown function
PC1	Cq2A	8583133	8586102	ID=CQ053439-RA	Similar to Pectate lyase (Lilium longiflorum OX%3D4690)
PC1	Cq2A	8545139	8548052	ID=CQ053437-RA	Similar to HIR1: Hypersensitive-induced reaction 1 protein (Capsicum annuum OX%3D4072)
PC1	Cq2A	8548504	8552294	ID=CQ053438-RA	Similar to Mitochondrial outer membrane protein porin of 34 kDa (Solanum tuberosum OX%3D4113)									n.69035836T>A	.	.	A|downstream_gene_variant|MODIFIER|CQ012530|CQ012530|transcript|CQ012530-RA|protein_coding||c.*2370T>A|||||2087|	A|intergenic_region|MODIFIER|CQ012530-CQ012531|CQ012530-CQ012531|intergenic_region|CQ012530-CQ012531|||n.69035836T>A||||||
PC1	Cq2A	8632147	8645277	ID=CQ053442-RA	Similar to sconB: Probable E3 ubiquitin ligase complex SCF subunit sconB (Arthroderma otae (strain ATCC MYA-4605 / CBS 113480) OX%3D554155)									c.538+1392C>T	.	.	A|upstream_gene_variant|MODIFIER|CQ032652|CQ032652|transcript|CQ032652-RA|protein_coding||c.-4865G>A|||||4865|	A|intron_variant|MODIFIER|CQ032651|CQ032651|transcript|CQ032651-RA|protein_coding|2/5|c.538+1392C>T||||||
PC1	Cq2A	8587285	8589327	ID=CQ053441-RA	Protein of unknown function									c.538+1390T>C	.	.	G|upstream_gene_variant|MODIFIER|CQ032652|CQ032652|transcript|CQ032652-RA|protein_coding||c.-4863A>G|||||4863|	G|intron_variant|MODIFIER|CQ032651|CQ032651|transcript|CQ032651-RA|protein_coding|2/5|c.538+1390T>C||||||
PC1	Cq2A	8584767	8587029	ID=CQ053440-RA	Protein of unknown function
PC1	Cq2A	8779431	8783499	ID=CQ053450-RA	Similar to WRKY72: Probable WRKY transcription factor 72 (Arabidopsis thaliana OX%3D3702)
PC1	Cq2A	8755992	8763403	ID=CQ053448-RA	Similar to PCO2: Plant cysteine oxidase 2 (Arabidopsis thaliana OX%3D3702)
PC1	Cq2A	8769252	8769501	ID=CQ053449-RA	Protein of unknown function
PC1	Cq2A	8844119	8845156	ID=CQ053453-RA	Similar to SNRNP40: U5 small nuclear ribonucleoprotein 40 kDa protein (Bos taurus OX%3D9913)
PC1	Cq2A	8846451	8862904	ID=CQ053454-RA	Similar to GATB: Glutamyl-tRNA(Gln) amidotransferase subunit B%2C chloroplastic/mitochondrial (Ricinus communis OX%3D3988)
PC1	Cq2A	8789850	8803674	ID=CQ053451-RA	Similar to RCOM_0855130: Translation factor GUF1 homolog%2C mitochondrial (Ricinus communis OX%3D3988)
PC1	Cq2A	8816915	8818880	ID=CQ053452-RA	Similar to At4g14103: F-box/LRR-repeat protein At4g14103 (Arabidopsis thaliana OX%3D3702)
PC1	Cq2A	11587955	11588143	ID=CQ053573-RA	Protein of unknown function
PC1	Cq2A	11583265	11584469	ID=CQ053572-RA	Similar to HYP1: CSC1-like protein HYP1 (Arabidopsis thaliana OX%3D3702)
PC1	Cq2A	11580076	11580910	ID=CQ053571-RA	Similar to HYP1: CSC1-like protein HYP1 (Arabidopsis thaliana OX%3D3702)
PC1	Cq2A	11655756	11659124	ID=CQ053575-RA	Similar to OHP1: Light-harvesting complex-like protein OHP1%2C chloroplastic (Arabidopsis thaliana OX%3D3702)
PC1	Cq2A	11649338	11653861	ID=CQ053574-RA	Similar to At3g19330: UPF0496 protein At3g19330 (Arabidopsis thaliana OX%3D3702)
PC1	Cq2A	11657918	11664895	ID=CQ053576-RA	Protein of unknown function
PC1	Cq2A	13989726	13992117	ID=CQ053676-RA	Protein of unknown function
PC1	Cq2A	14078912	14081677	ID=CQ053680-RA	Similar to RPS19A: 40S ribosomal protein S19-1 (Arabidopsis thaliana OX%3D3702)
PC1	Cq2A	13991198	13991440	ID=CQ053677-RA	Similar to CRR7: Protein CHLORORESPIRATORY REDUCTION 7%2C chloroplastic (Arabidopsis thaliana OX%3D3702)
PC1	Cq2A	15953446	15964845	ID=CQ053761-RA	Similar to DOT2: SART-1 family protein DOT2 (Arabidopsis thaliana OX%3D3702)
PC1	Cq2A	15966838	15968130	ID=CQ053763-RA	Similar to At1g75140: Uncharacterized membrane protein At1g75140 (Arabidopsis thaliana OX%3D3702)
PC1	Cq2A	15965581	15983037	ID=CQ053762-RA	Protein of unknown function
PC1	Cq2A	16218453	16219237	ID=CQ053765-RA	Protein of unknown function
PC1	Cq2A	19163673	19166543	ID=CQ053853-RA	Protein of unknown function
PC1	Cq2A	19149459	19150884	ID=CQ053852-RA	Protein of unknown function
PC1	Cq2A	19404506	19406558	ID=CQ053857-RA	Similar to BSK5: Serine/threonine-protein kinase BSK5 (Arabidopsis thaliana OX%3D3702)
PC1	Cq2A	20375675	20380797	ID=CQ053885-RA	Similar to POPTR_0012s05040g: L-Ala-D/L-amino acid epimerase (Populus trichocarpa OX%3D3694)
PC1	Cq2A	20385053	20385340	ID=CQ053886-RA	Similar to Probable non-specific lipid-transfer protein AKCS9 (Vigna unguiculata OX%3D3917)
PC1	Cq2A	20308522	20308953	ID=CQ053883-RA	Protein of unknown function
PC1	Cq2A	20308959	20311442	ID=CQ053884-RA	Protein of unknown function
PC1	Cq2A	20386405	20386644	ID=CQ053887-RA	Protein of unknown function
PC1	Cq2A	20923927	20924314	ID=CQ053896-RA	Protein of unknown function
PC1	Cq2A	34710778	34718778	ID=CQ054216-RA	Similar to V-type proton ATPase catalytic subunit A (Beta vulgaris OX%3D161934)
PC1	Cq2A	34734199	34738352	ID=CQ054217-RA	Protein of unknown function
PC1	Cq2A	34747696	34748264	ID=CQ054219-RA	Protein of unknown function
PC1	Cq2A	34737947	34745299	ID=CQ054218-RA	Similar to PYD1: Dihydropyrimidine dehydrogenase (NADP(+))%2C chloroplastic (Arabidopsis thaliana OX%3D3702)
PC1	Cq2A	34747909	34748252	ID=CQ054220-RA	Protein of unknown function
PC1	Cq2A	35506408	35513840	ID=CQ054246-RA	Protein of unknown function
PC1	Cq2A	35534022	35535486	ID=CQ054248-RA	Similar to ivns1abpa: Influenza virus NS1A-binding protein homolog A (Danio rerio OX%3D7955)
PC1	Cq2A	35500431	35502746	ID=CQ054245-RA	Similar to NPF2.6: Protein NRT1/ PTR FAMILY 2.6 (Arabidopsis thaliana OX%3D3702)
PC1	Cq2A	35518665	35523050	ID=CQ054247-RA	Similar to ARP1: Probable RNA-binding protein ARP1 (Arabidopsis thaliana OX%3D3702)
PC1	Cq2A	35714235	35715641	ID=CQ054258-RA	Similar to CIPK4: CBL-interacting serine/threonine-protein kinase 4 (Arabidopsis thaliana OX%3D3702)
PC1	Cq2A	35729049	35740121	ID=CQ054260-RA	Similar to DDB_G0281815: Golgi to ER traffic protein 4 homolog (Dictyostelium discoideum OX%3D44689)
PC1	Cq2A	35740686	35744824	ID=CQ054261-RA	Protein of unknown function
PC1	Cq2A	35719576	35721565	ID=CQ054259-RA	Protein of unknown function
PC1	Cq2A	35804401	35806524	ID=CQ054262-RA	Similar to At2g16880: Pentatricopeptide repeat-containing protein At2g16880 (Arabidopsis thaliana OX%3D3702)
PC1	Cq2A	35827003	35827398	ID=CQ054266-RA	Protein of unknown function
PC1	Cq2A	35825547	35825759	ID=CQ054265-RA	Similar to RPP13L4: Disease resistance RPP13-like protein 4 (Arabidopsis thaliana OX%3D3702)
PC1	Cq2A	35824240	35824603	ID=CQ054264-RA	Protein of unknown function
PC1	Cq2A	35827403	35827702	ID=CQ054267-RA	Similar to RGA2: Disease resistance protein RGA2 (Solanum bulbocastanum OX%3D147425)
PC1	Cq2A	35810916	35817389	ID=CQ054263-RA	Similar to ACD6: Protein ACCELERATED CELL DEATH 6 (Arabidopsis thaliana OX%3D3702)
PC1	Cq2A	35853043	35853917	ID=CQ054270-RA	Protein of unknown function
PC1	Cq2A	35861117	35861458	ID=CQ054273-RA	Protein of unknown function
PC1	Cq2A	35830717	35830914	ID=CQ054268-RA	Protein of unknown function
PC1	Cq2A	35831024	35831080	ID=CQ054269-RA	Protein of unknown function
PC2	Cq6B	17134827	17141565	ID=CQ000972-RA	Protein of unknown function
PC2	Cq6B	17131575	17132217	ID=CQ000971-RA	Protein of unknown function
PC2	Cq6B	17141217	17141599	ID=CQ000973-RA	Protein of unknown function
PC2	Cq6B	50954830	50957076	ID=CQ001442-RA	Similar to At5g39840: DExH-box ATP-dependent RNA helicase DExH18%2C mitochondrial (Arabidopsis thaliana OX%3D3702)
PC2	Cq5B	39070022	39072040	ID=CQ005259-RA	Similar to PUMP1: Mitochondrial uncoupling protein 1 (Arabidopsis thaliana OX%3D3702)
PC2	Cq5B	68808880	68813385	ID=CQ006031-RA	Similar to At5g07800: Flavin-containing monooxygenase FMO GS-OX-like 9 (Arabidopsis thaliana OX%3D3702)
PC2	Cq5B	68786305	68790219	ID=CQ006027-RA	Similar to UNE10: Transcription factor UNE10 (Arabidopsis thaliana OX%3D3702)
PC2	Cq5B	68796527	68796796	ID=CQ006029-RA	Protein of unknown function
PC2	Cq5B	68816986	68822401	ID=CQ006033-RA	Protein of unknown function
PC2	Cq5B	68811297	68815962	ID=CQ006032-RA	Protein of unknown function
PC2	Cq5B	68834807	68841498	ID=CQ006034-RA	Similar to ASY1: Meiosis-specific protein ASY1 (Arabidopsis thaliana OX%3D3702)
PC2	Cq5B	68801869	68806762	ID=CQ006030-RA	Protein of unknown function
PC2	Cq5B	68793369	68798805	ID=CQ006028-RB	Protein of unknown function
PC2	Cq5B	68793369	68797204	ID=CQ006028-RA	Protein of unknown function
PC2	Cq5B	68873804	68888180	ID=CQ006035-RA	Protein of unknown function
PC2	Cq8B	48925833	48926142	ID=CQ011641-RA	Protein of unknown function
PC2	Cq8B	49482287	49489012	ID=CQ011655-RA	Protein of unknown function
PC2	Cq8B	49504588	49512498	ID=CQ011656-RA	Similar to STR8: Rhodanese-like domain-containing protein 8%2C chloroplastic (Arabidopsis thaliana OX%3D3702)
PC2	Cq8B	49579189	49579936	ID=CQ011657-RA	Protein of unknown function
PC2	Cq8B	49701984	49711366	ID=CQ011658-RA	Similar to EMB2271: U3 snoRNP-associated protein-like EMB2271 (Arabidopsis thaliana OX%3D3702)
PC2	Cq8B	49712687	49713340	ID=CQ011659-RA	Protein of unknown function
PC2	Cq8B	49909827	49919783	ID=CQ011660-RA	Similar to NUP1: Nuclear pore complex protein NUP1 (Arabidopsis thaliana OX%3D3702)
PC2	Cq8B	49940813	49959918	ID=CQ011662-RA	Similar to wdr75: WD repeat-containing protein 75 (Danio rerio OX%3D7955)
PC2	Cq8B	49925530	49926216	ID=CQ011661-RA	Protein of unknown function
PC2	Cq8B	50268066	50276712	ID=CQ011663-RA	Similar to CAX5: Vacuolar cation/proton exchanger 5 (Arabidopsis thaliana OX%3D3702)
PC2	Cq8B	50318143	50320984	ID=CQ011666-RA	Protein of unknown function
PC2	Cq8B	50310603	50311656	ID=CQ011665-RA	Protein of unknown function
PC2	Cq8B	50291724	50295441	ID=CQ011664-RA	Protein of unknown function
PC2	Cq8B	50536535	50556201	ID=CQ011667-RA	Similar to At5g44450: Alpha N-terminal protein methyltransferase 1 (Arabidopsis thaliana OX%3D3702)
PC2	Cq8B	69042669	69044556	ID=CQ012531-RA	Similar to AZI1: pEARLI1-like lipid transfer protein 1 (Arabidopsis thaliana OX%3D3702)
PC2	Cq8B	69028038	69033749	ID=CQ012530-RA	Similar to PFP-ALPHA1: Pyrophosphate--fructose 6-phosphate 1-phosphotransferase subunit alpha 1 (Arabidopsis thaliana OX%3D3702)
PC2	Cq8B	69073697	69079789	ID=CQ012534-RA	Similar to RFS6: Probable galactinol--sucrose galactosyltransferase 6 (Arabidopsis thaliana OX%3D3702)
PC2	Cq8B	68984085	68994830	ID=CQ012526-RA	Similar to At5g35200: Putative clathrin assembly protein At5g35200 (Arabidopsis thaliana OX%3D3702)
PC2	Cq8B	68996007	68999637	ID=CQ012527-RA	Protein of unknown function
PC2	Cq8B	69000775	69016003	ID=CQ012528-RA	Protein of unknown function
PC2	Cq8B	69047435	69055649	ID=CQ012532-RA	Similar to cnot10-b: CCR4-NOT transcription complex subunit 10-B (Xenopus laevis OX%3D8355)
PC2	Cq8B	69057610	69064521	ID=CQ012533-RA	Similar to Rif1: Telomere-associated protein RIF1 (Mus musculus OX%3D10090)
PC2	Cq8B	69017026	69020540	ID=CQ012529-RA	Similar to VAMP711: Vesicle-associated membrane protein 711 (Arabidopsis thaliana OX%3D3702)
[truncated: 47 more rows]

## Sheet: Supplementary file 1h
Table S8: Daily temprature, precipitation, humidity, radiation and wind speed during the cultivation seasons 2018 and 2019 in Kiel, Germany
[truncated: 398 more rows]
